# Supplementary material for: Dissecting Metabolism of Leaf Nodules in Ardisia crenata and Psychotria punctata
Source: PubMed Central journal article supplement (PMC8362603; doi:10.3389/fmolb.2021.683671), 2021-07-30

# Catechin\_RT:17.81\_min\_m/z:291.0863

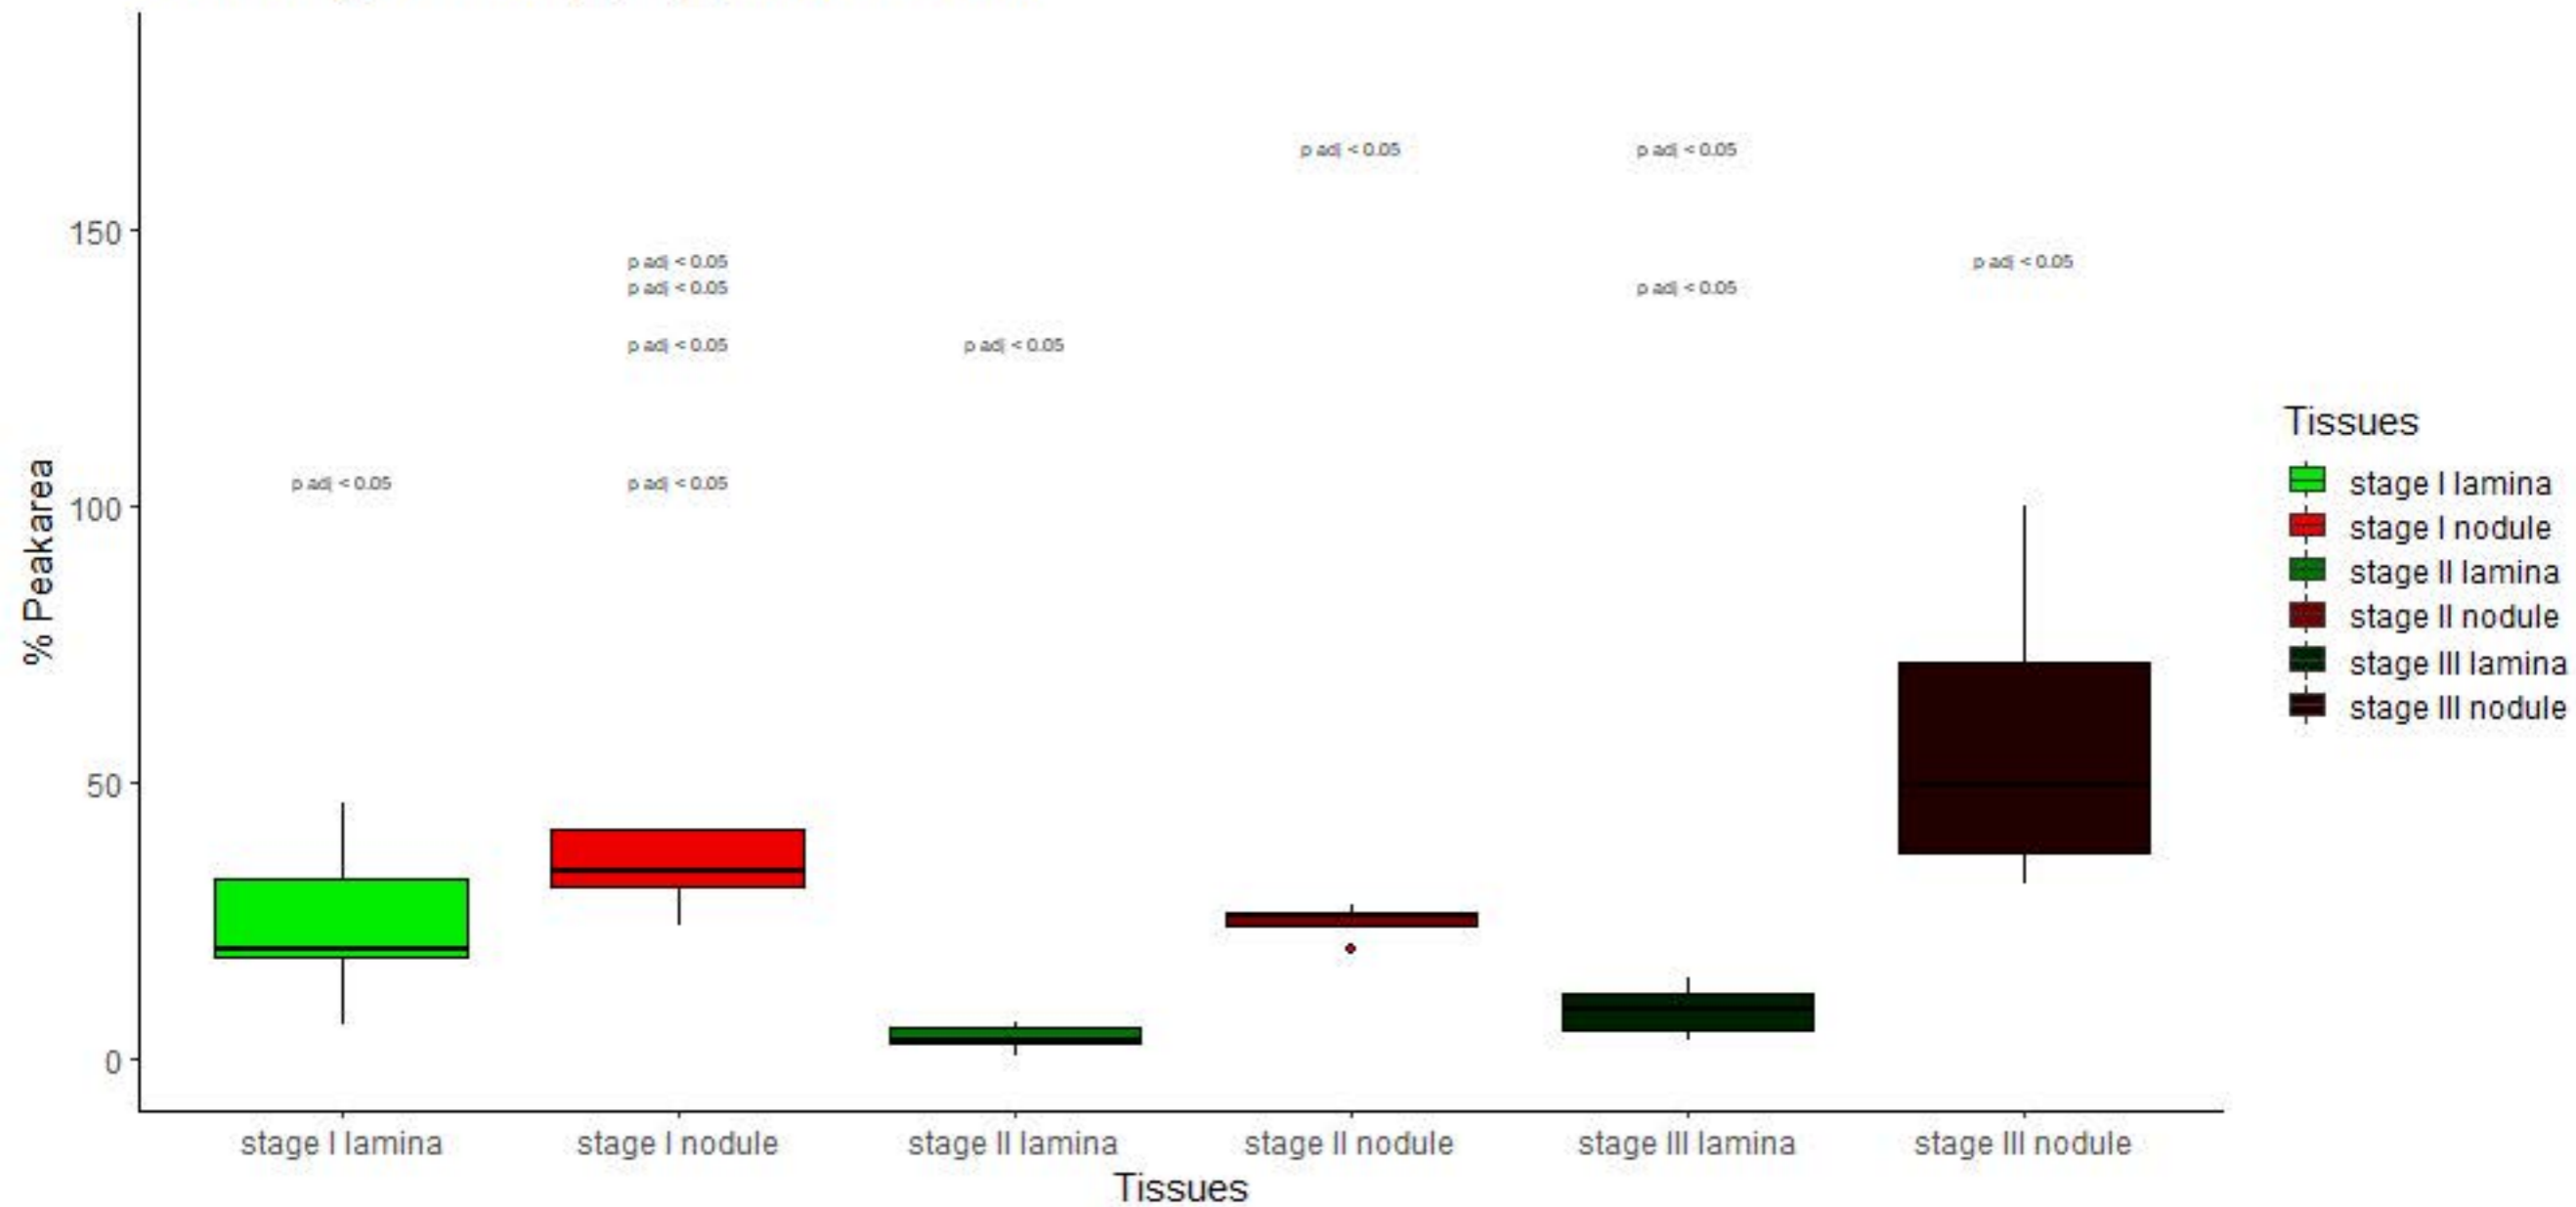

# Epicatechin\_RT:19.47\_min\_m/z:291.0863

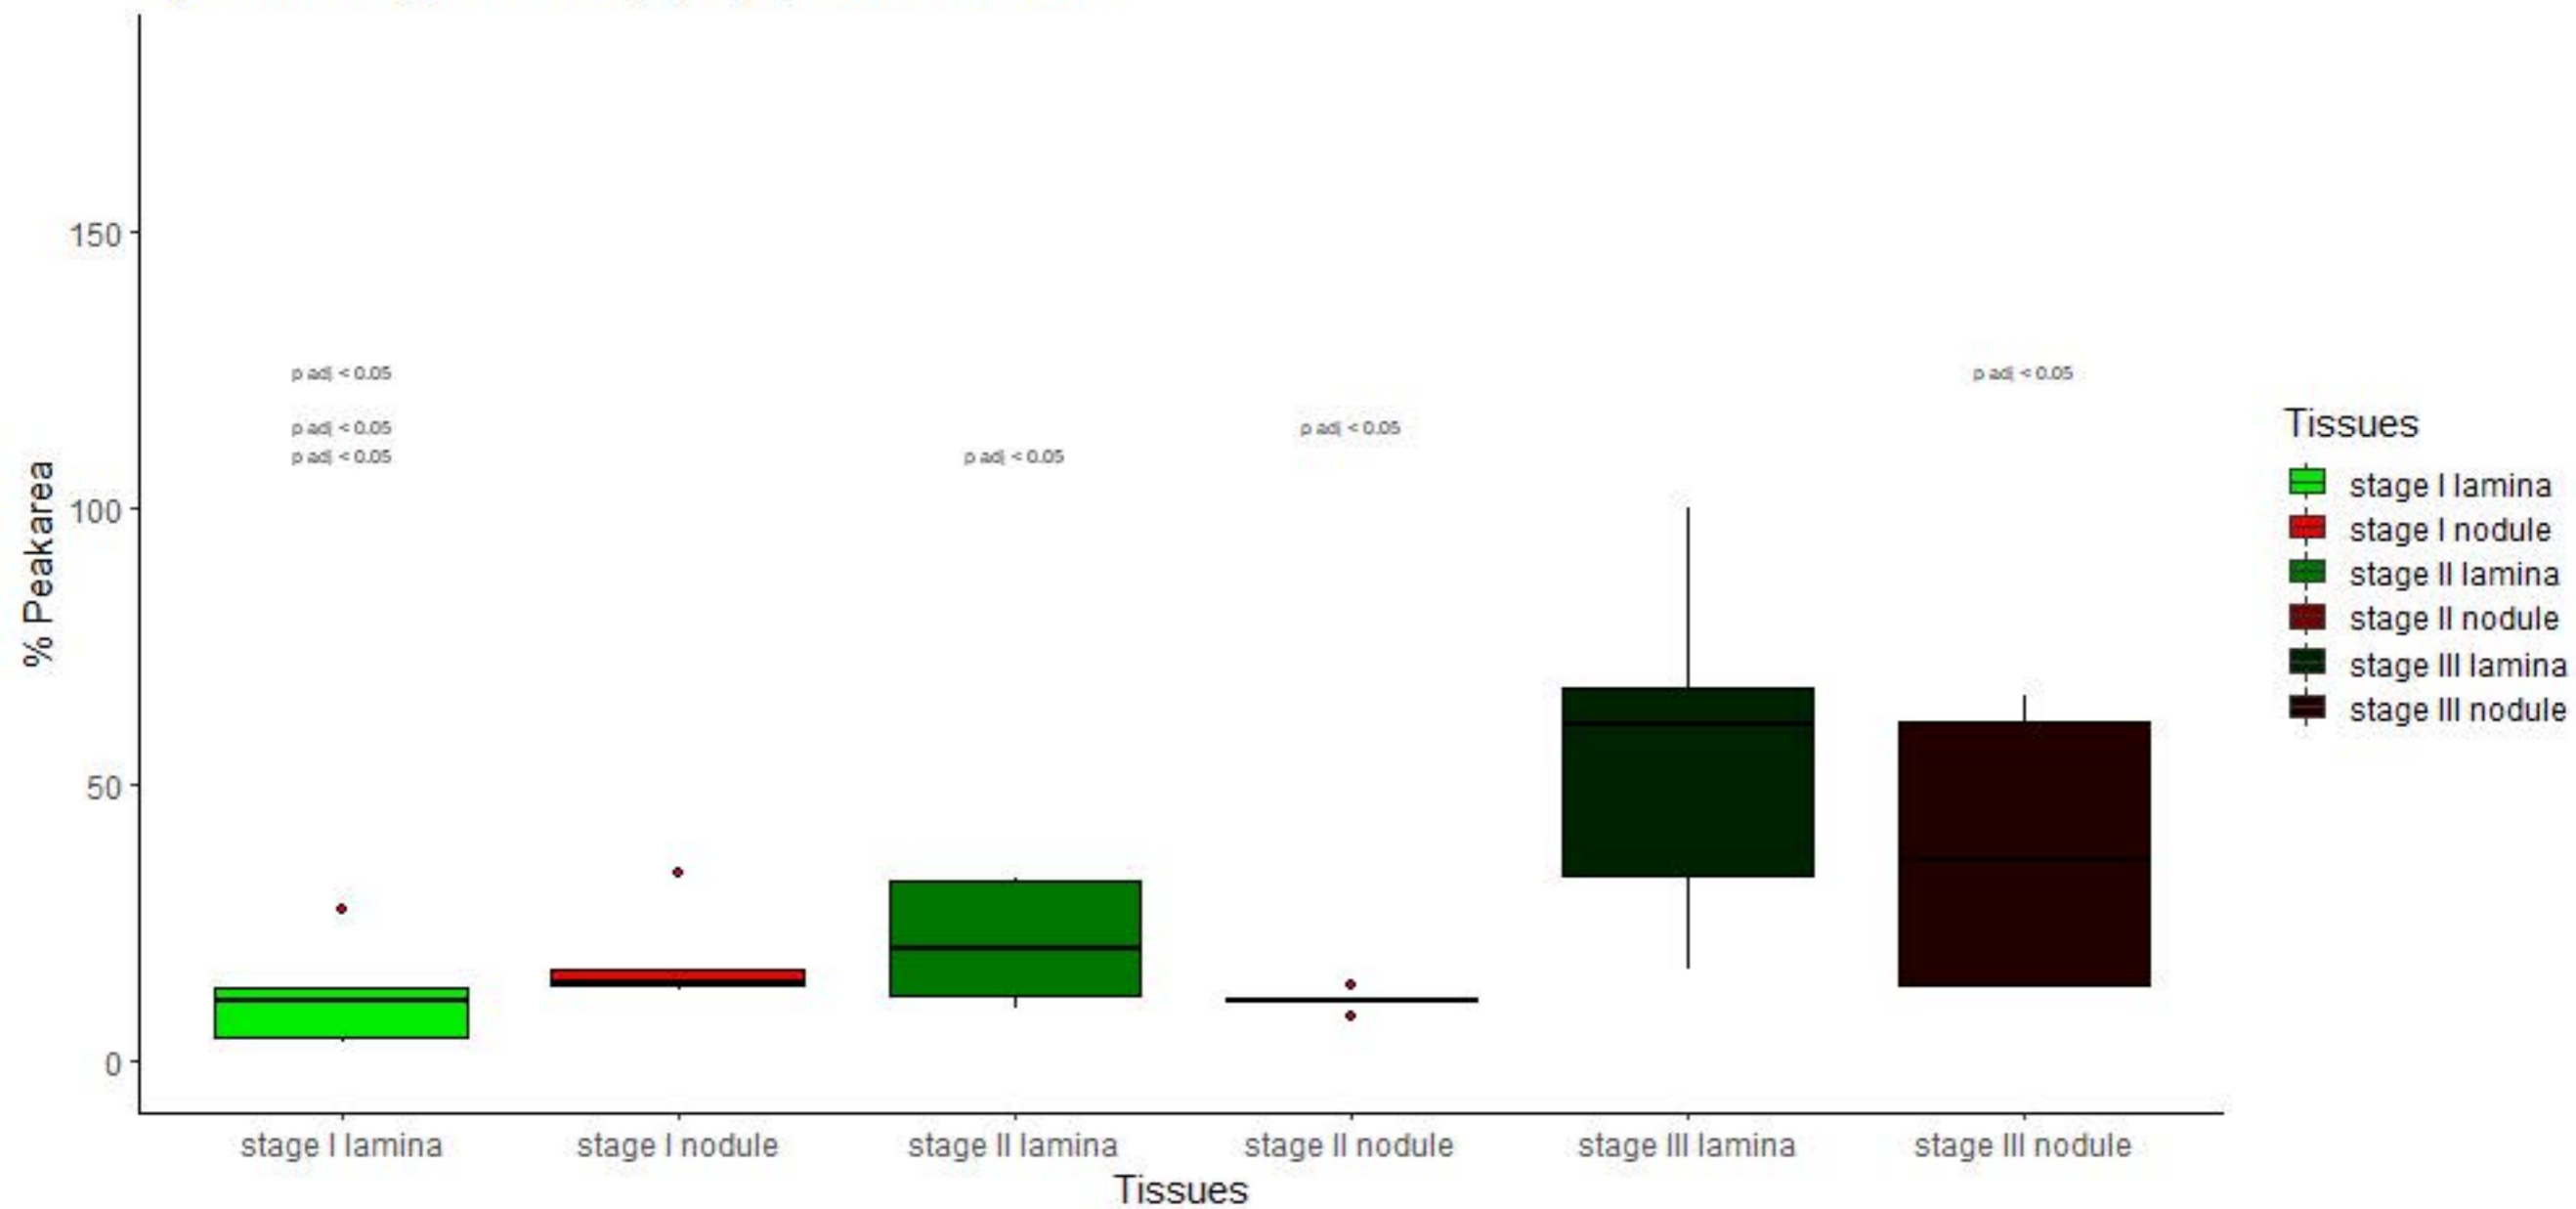

# Epigallocatechin\_gallate\_RT:19.75\_min\_m/z:459.0922

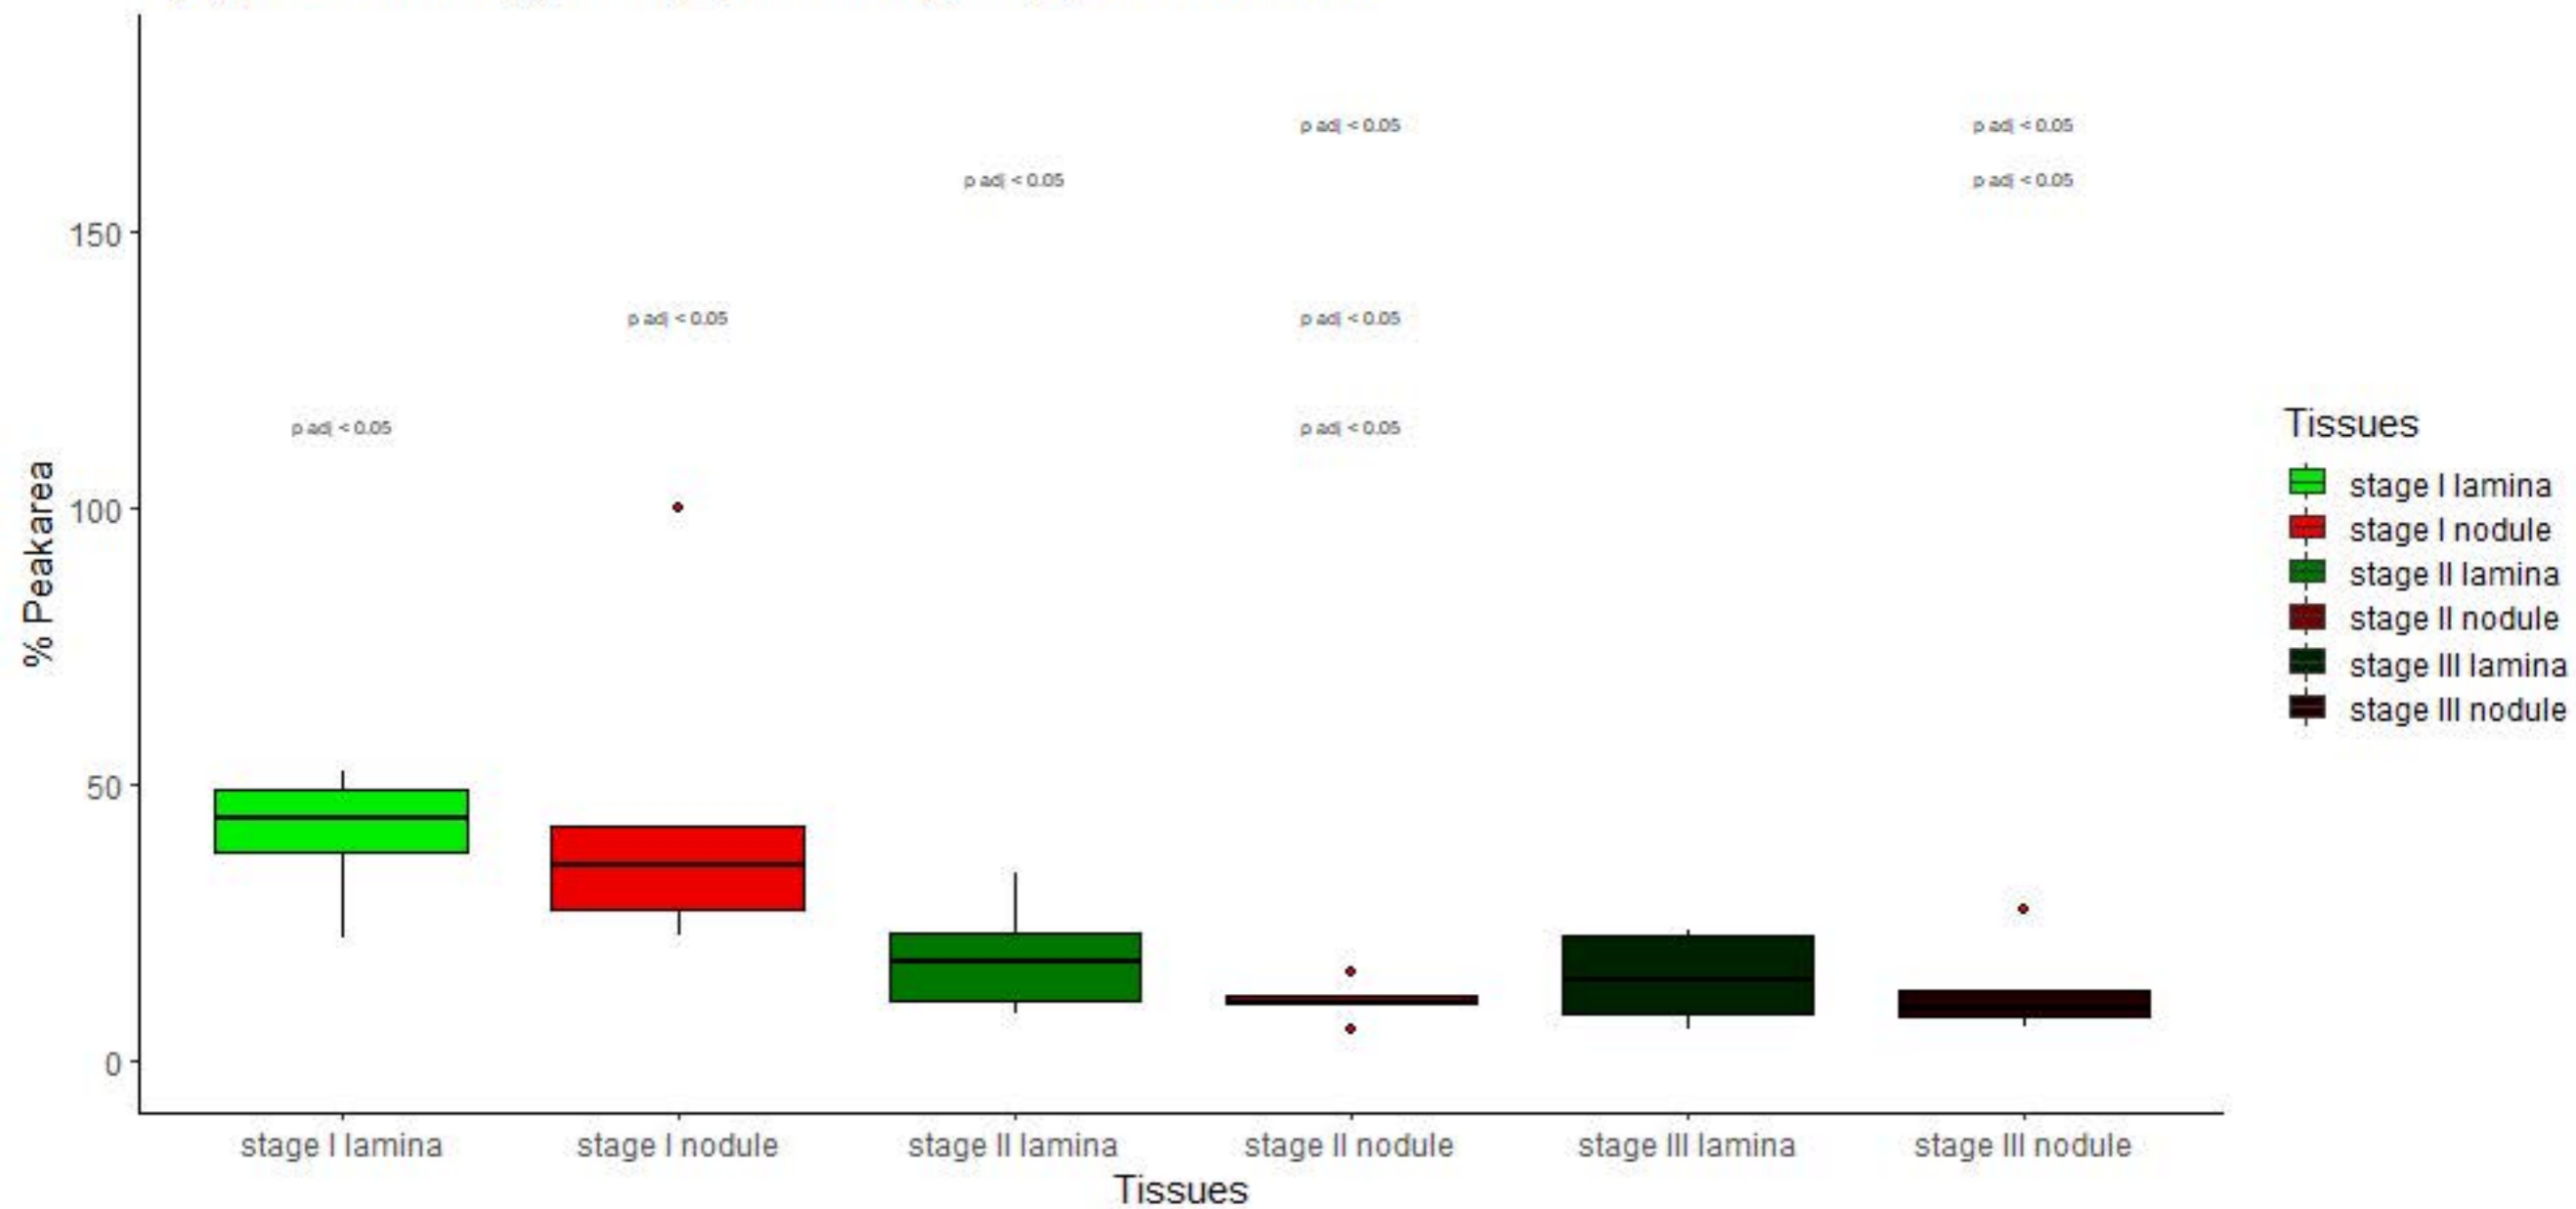

# Quercetin\_RT:20.72\_min\_m/z:303.0499

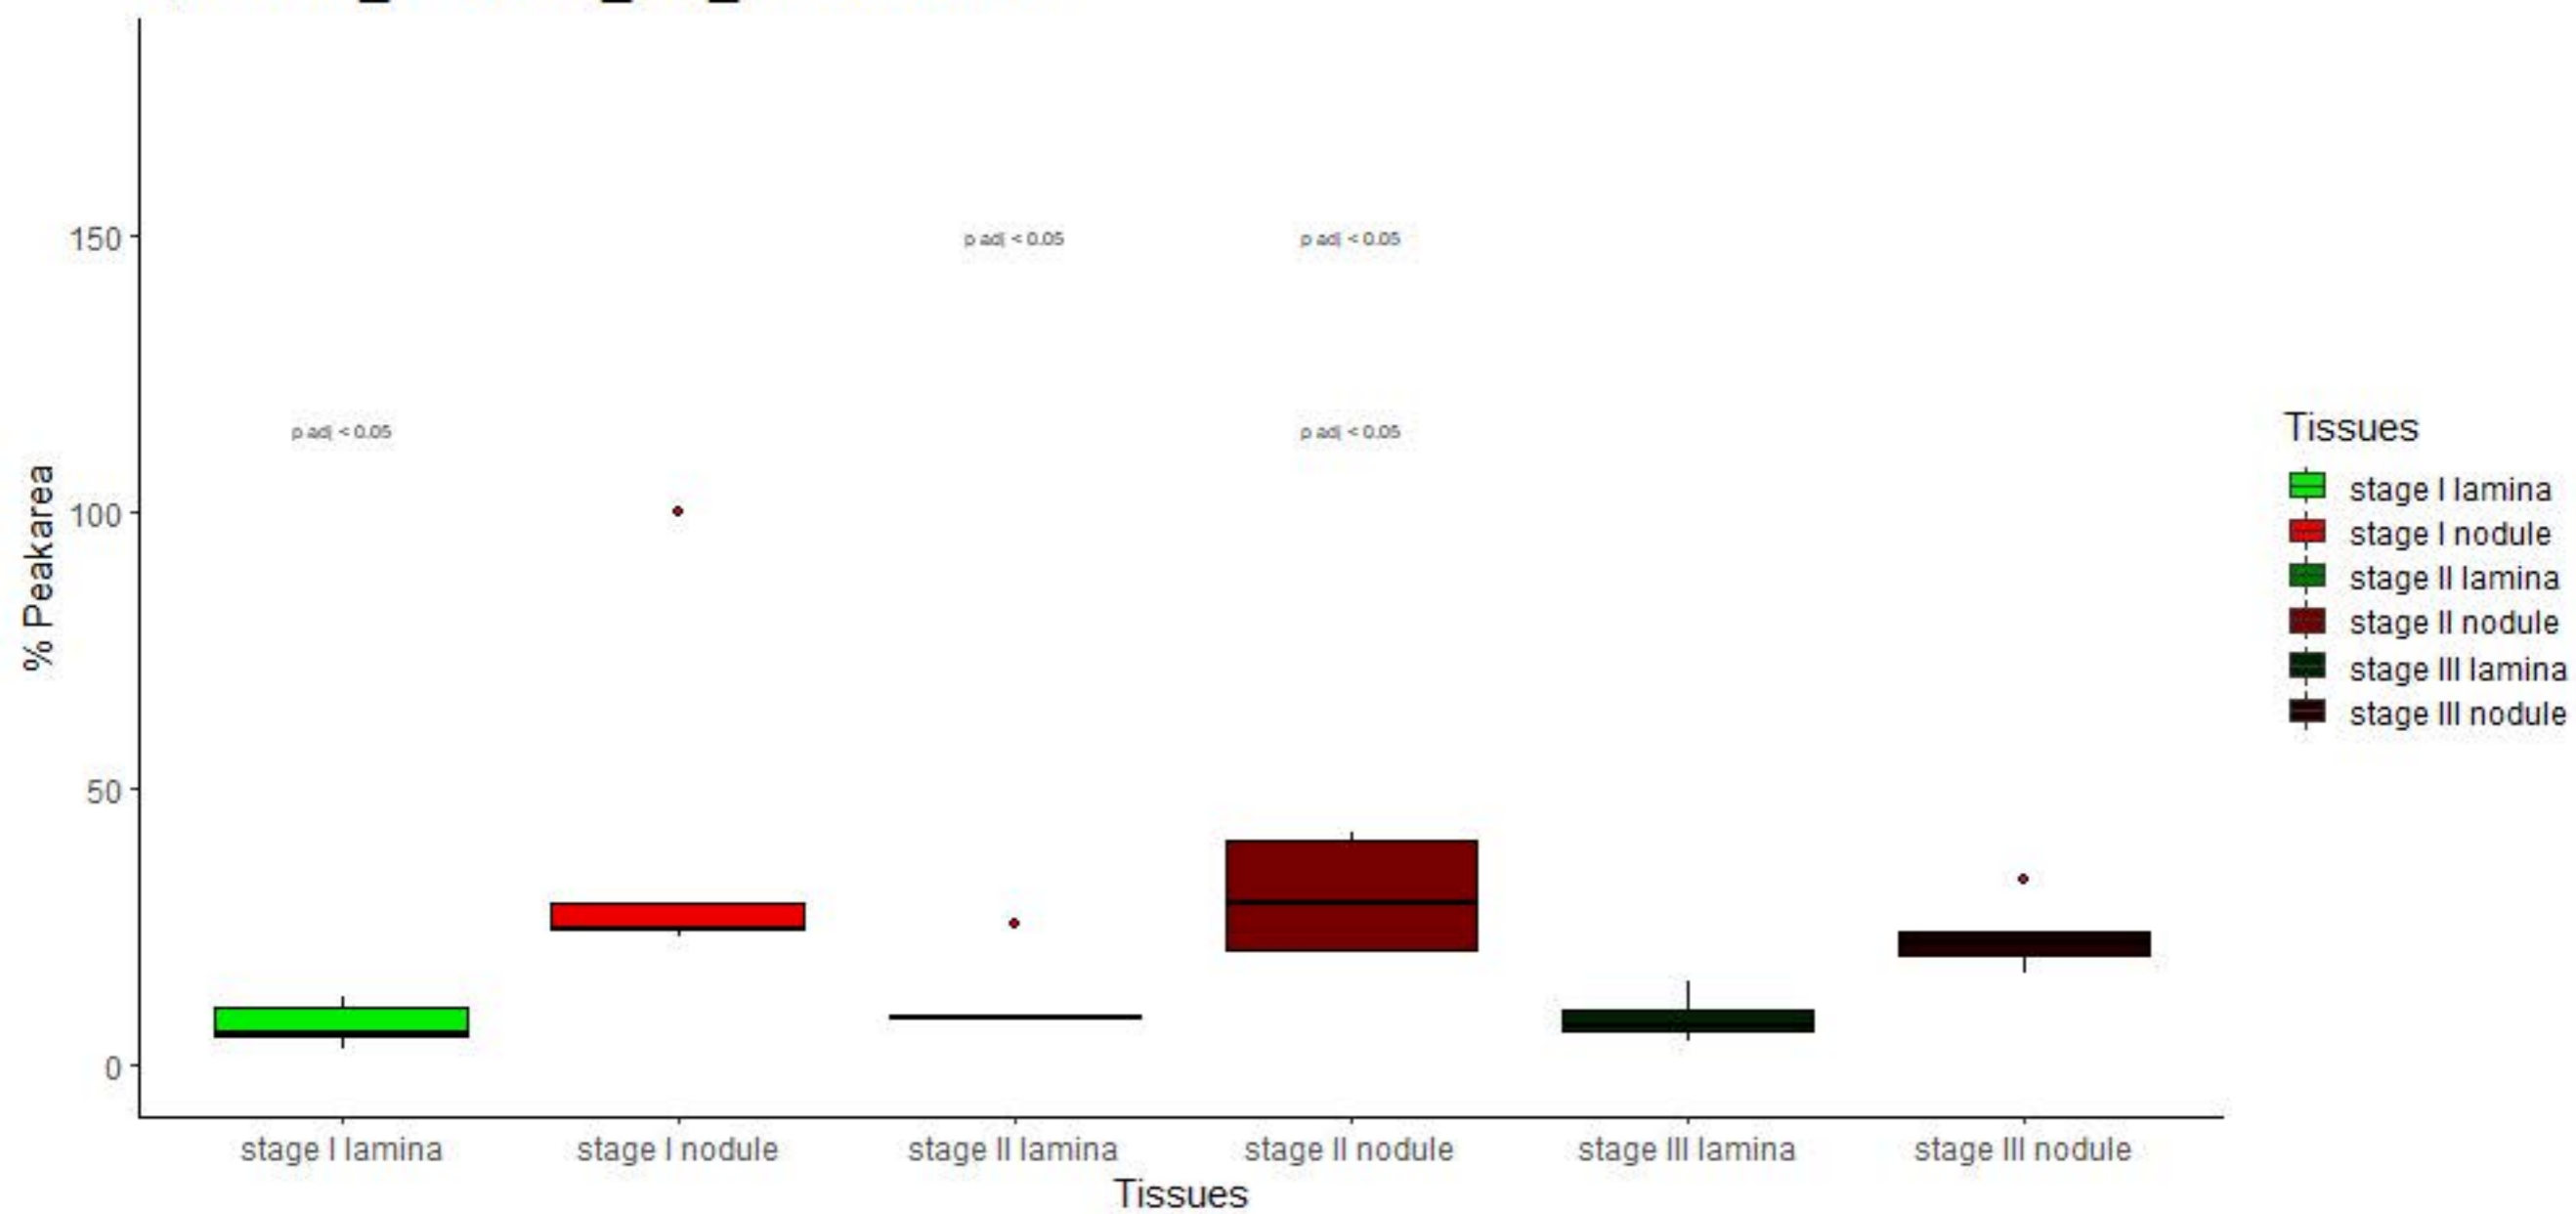

# Kaempferol\_dihexoside\_RT:22.01\_min\_m/z:611.1607

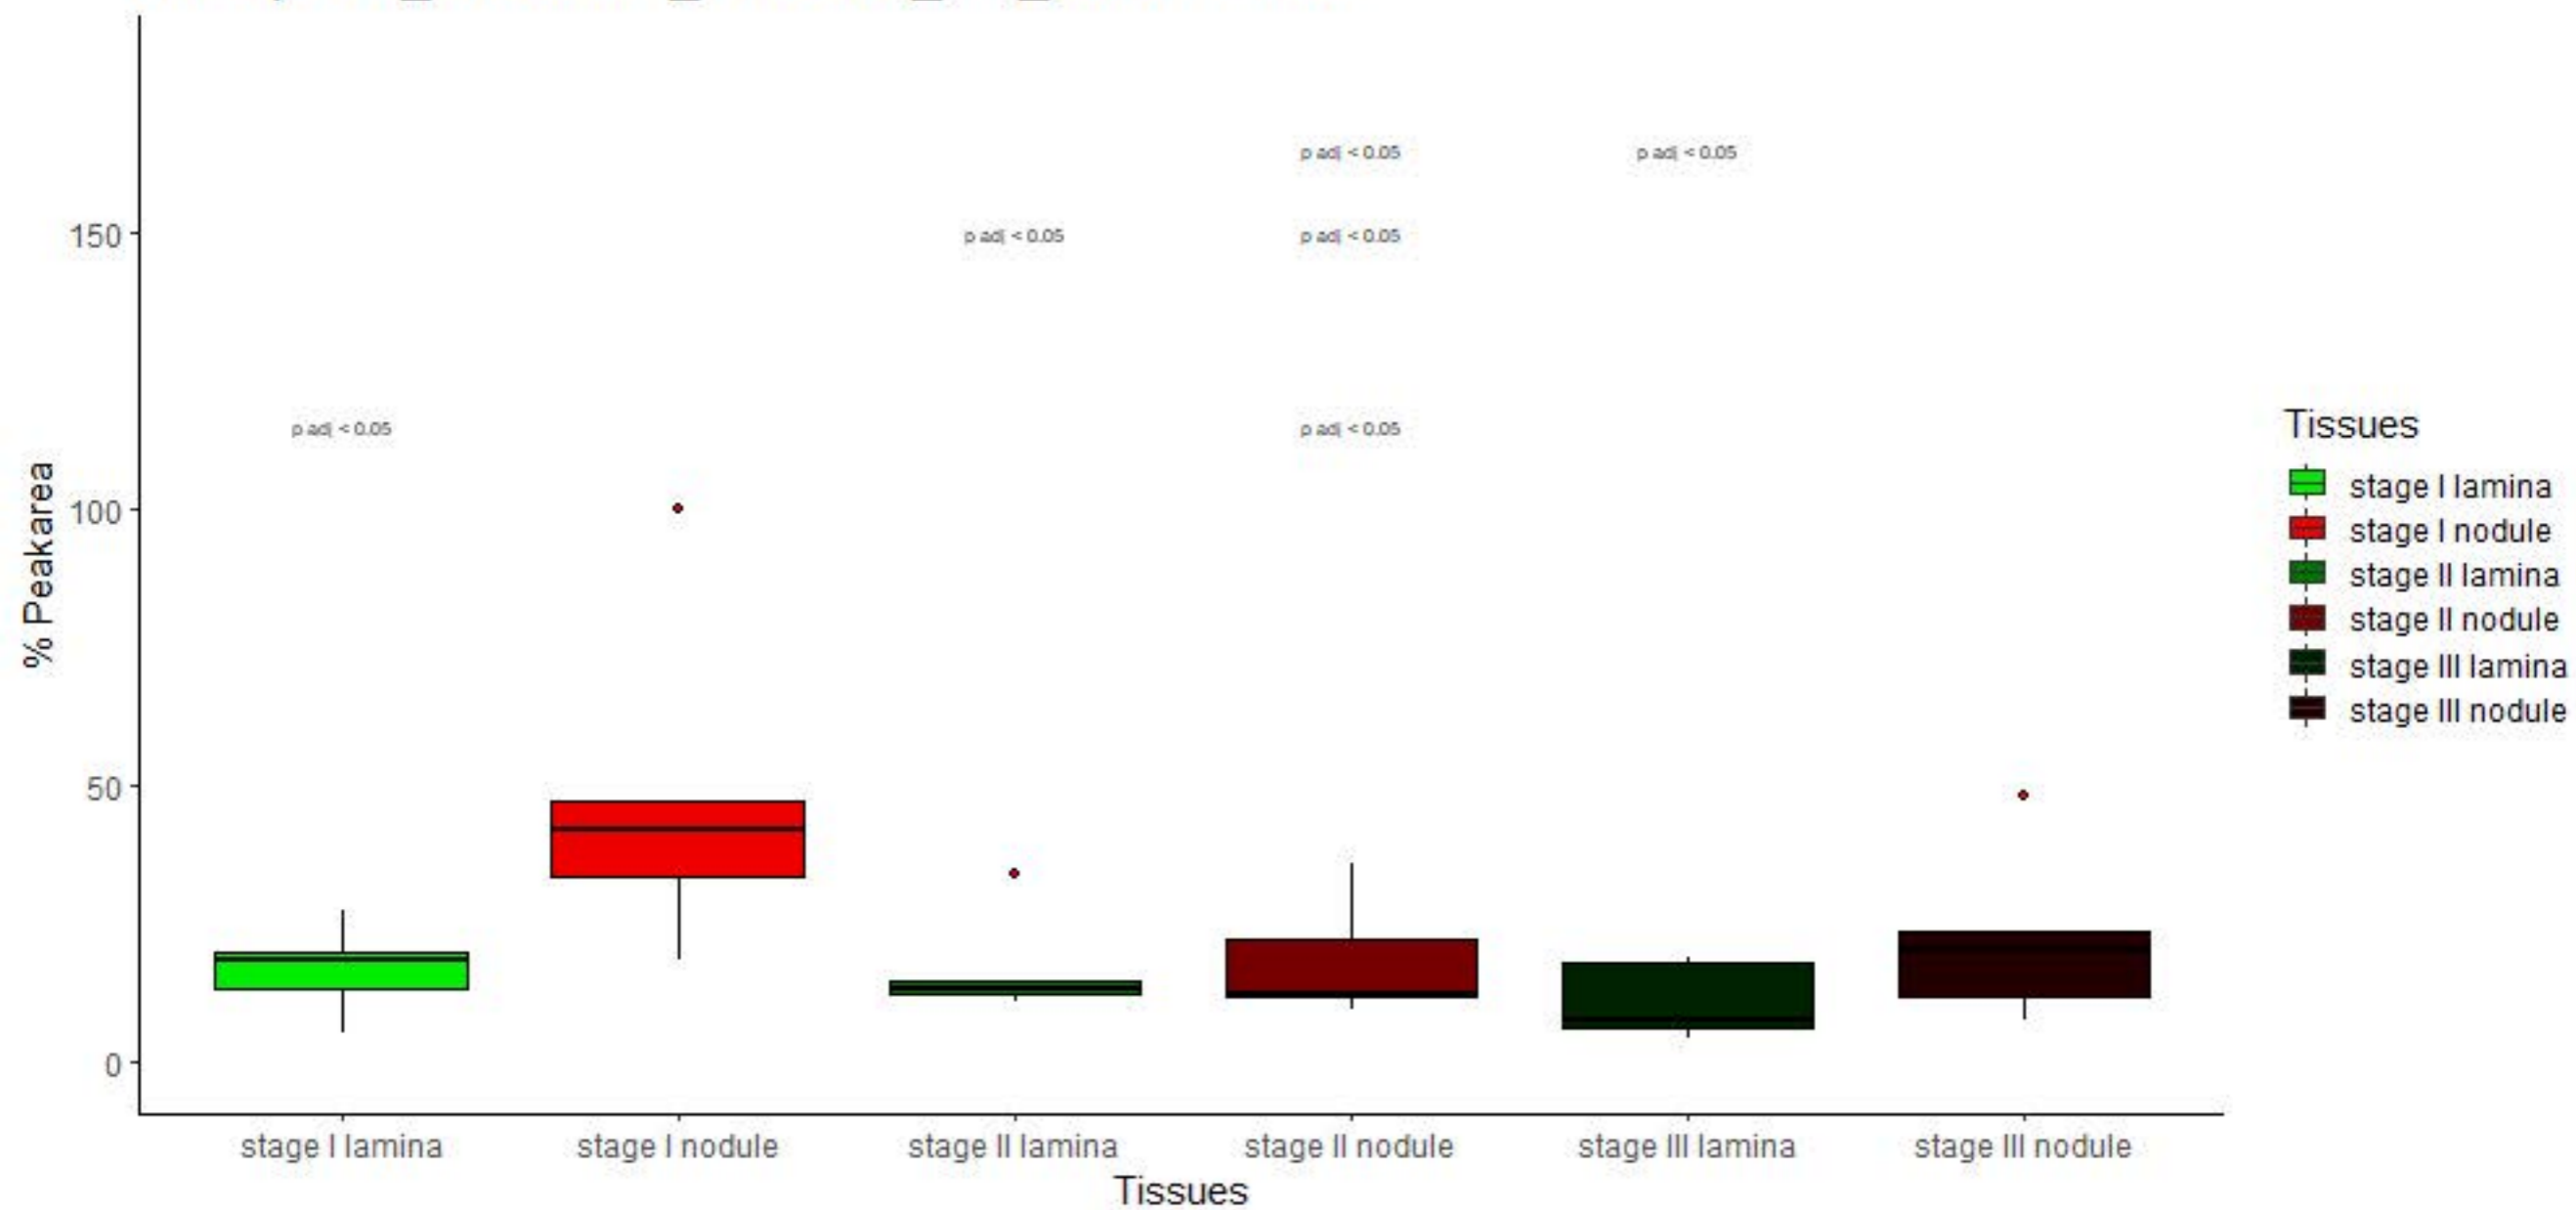

# Epicatechin 3'O-3-hydroxy-2-methyl\_propanoate\_RT:22.23\_min\_m/z:377.1230

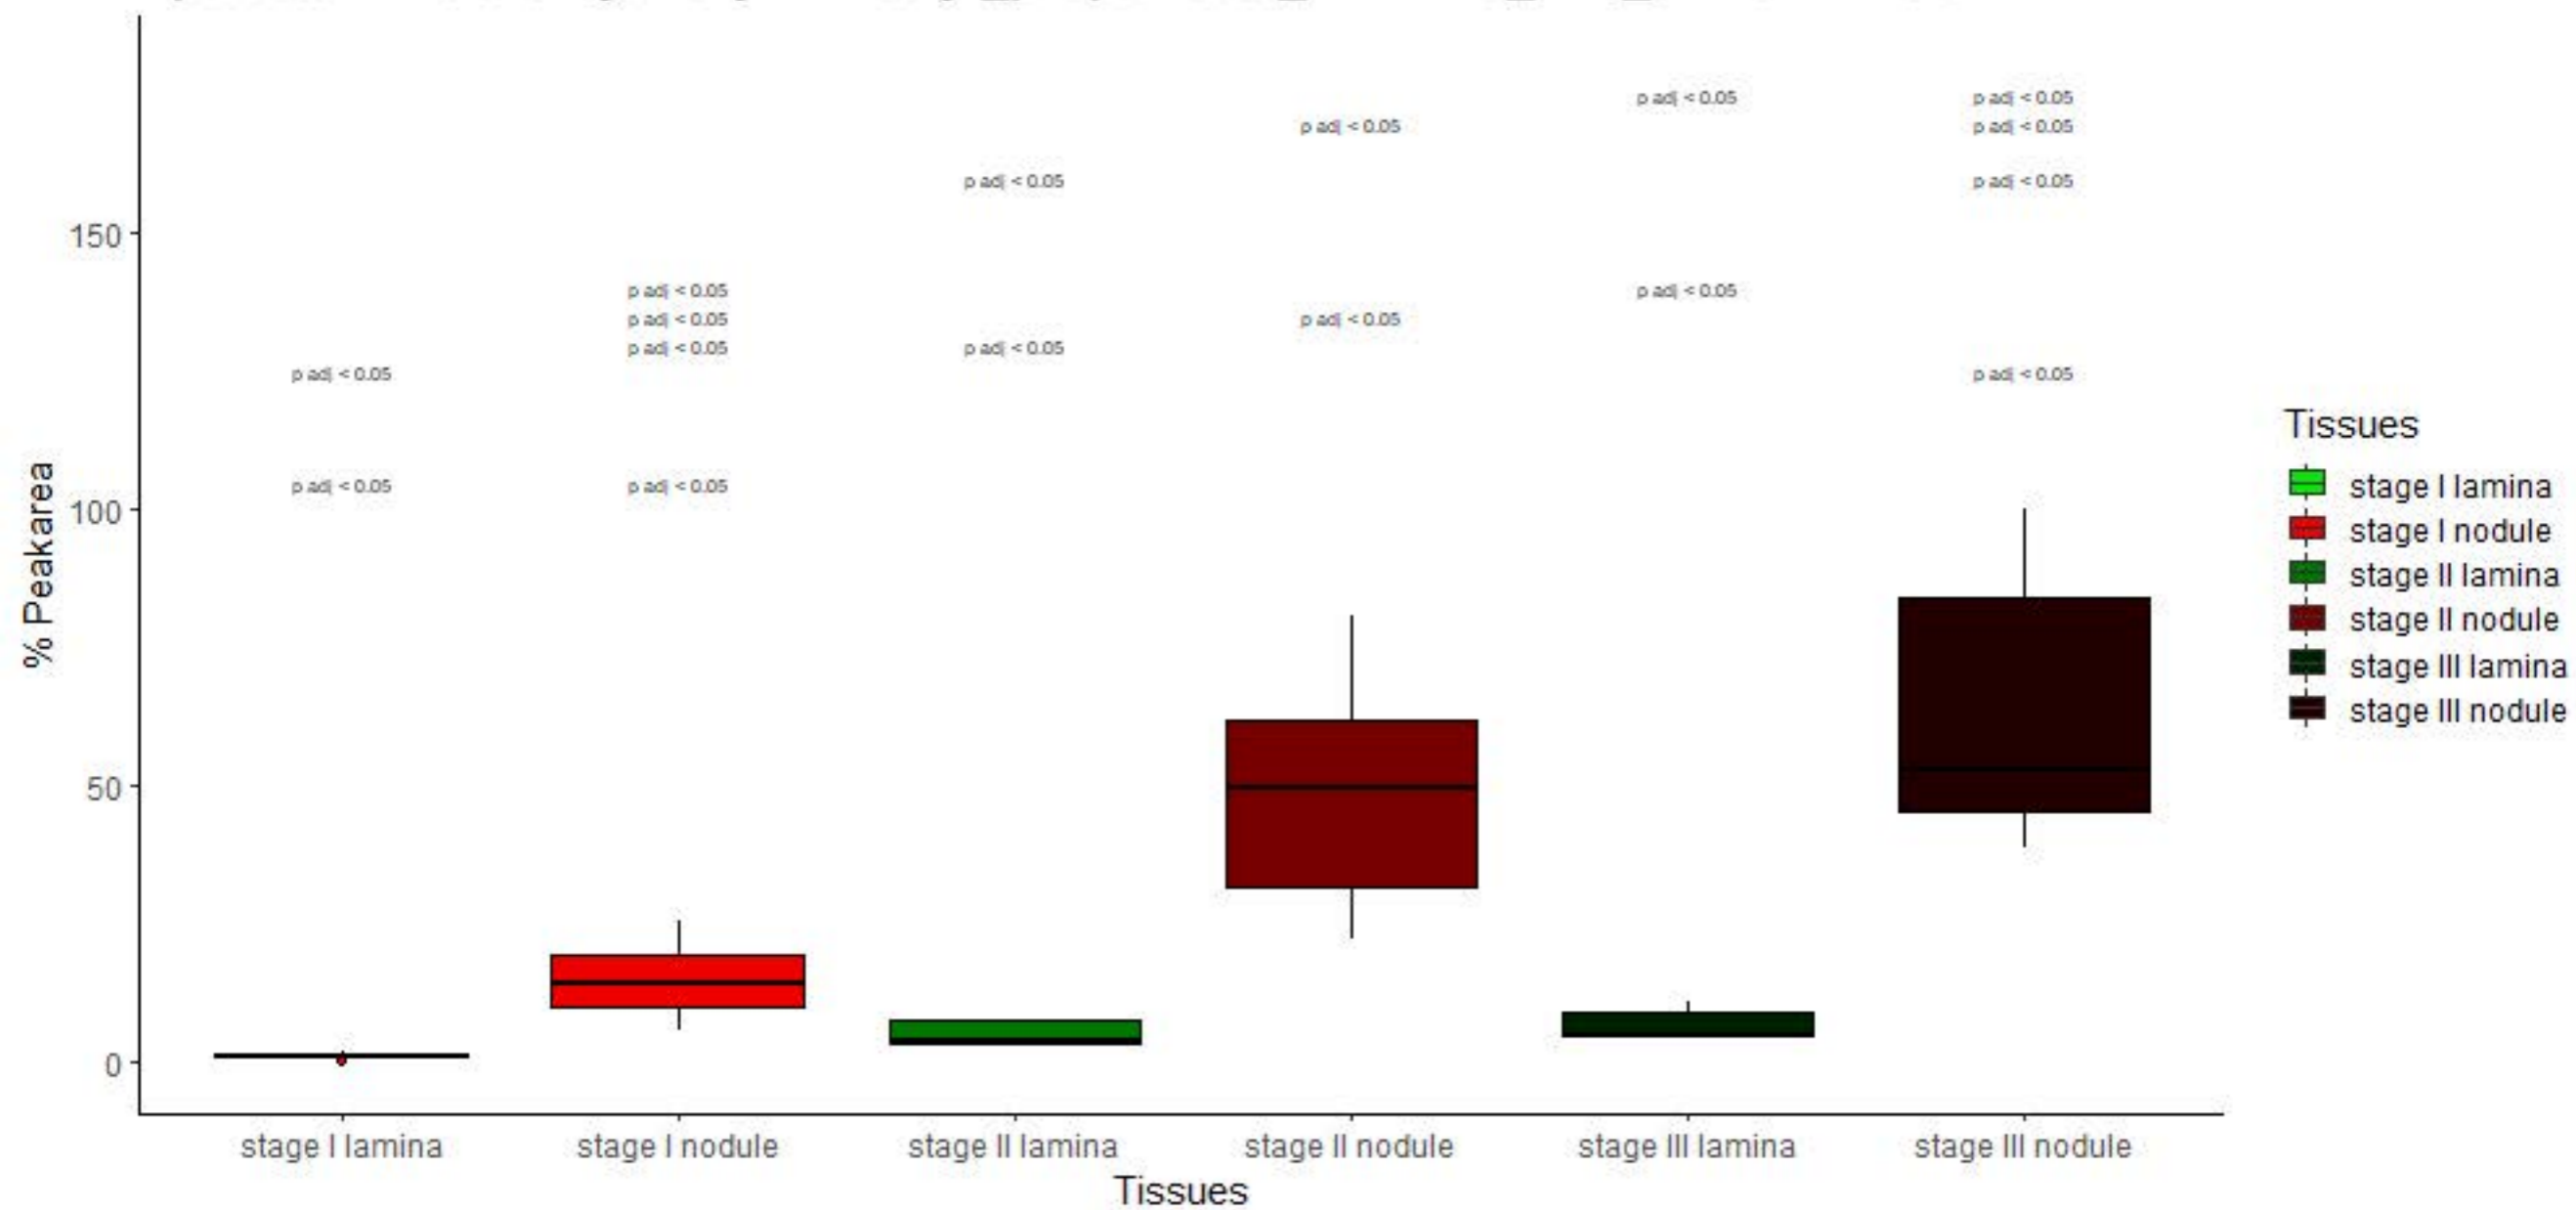

# Kaempferol\_O-glucoside\_RT:23.82\_min\_m/z:449.1078

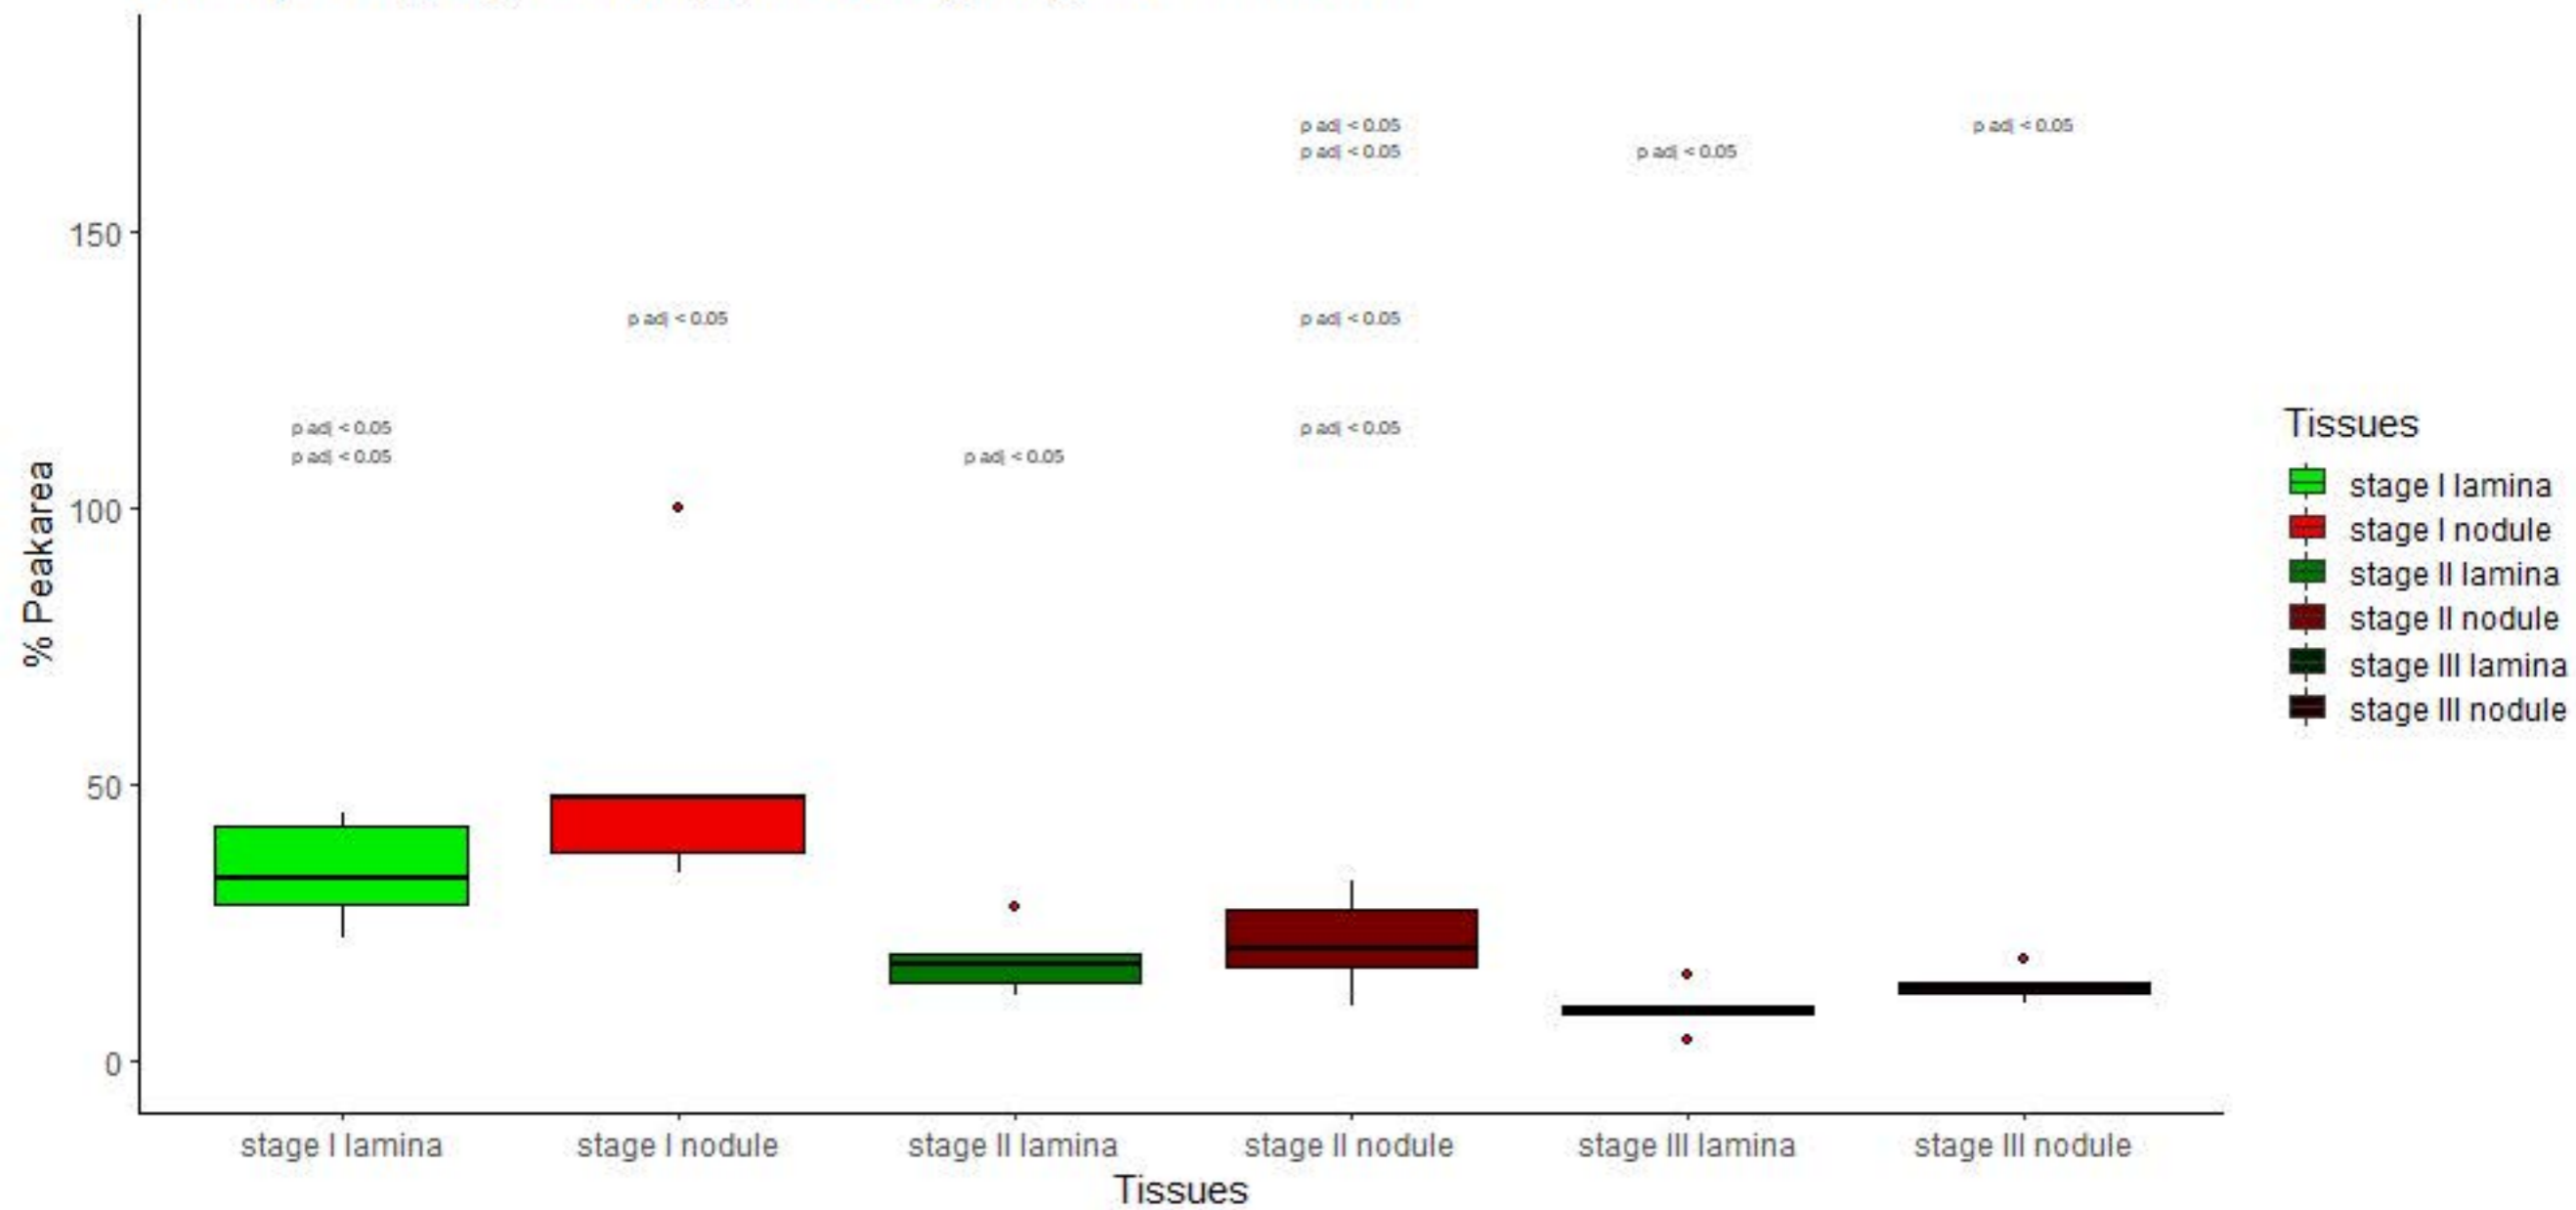

# Kaempferol\_O-rutinoside\_RT:22.84\_min\_m/z:595.1658

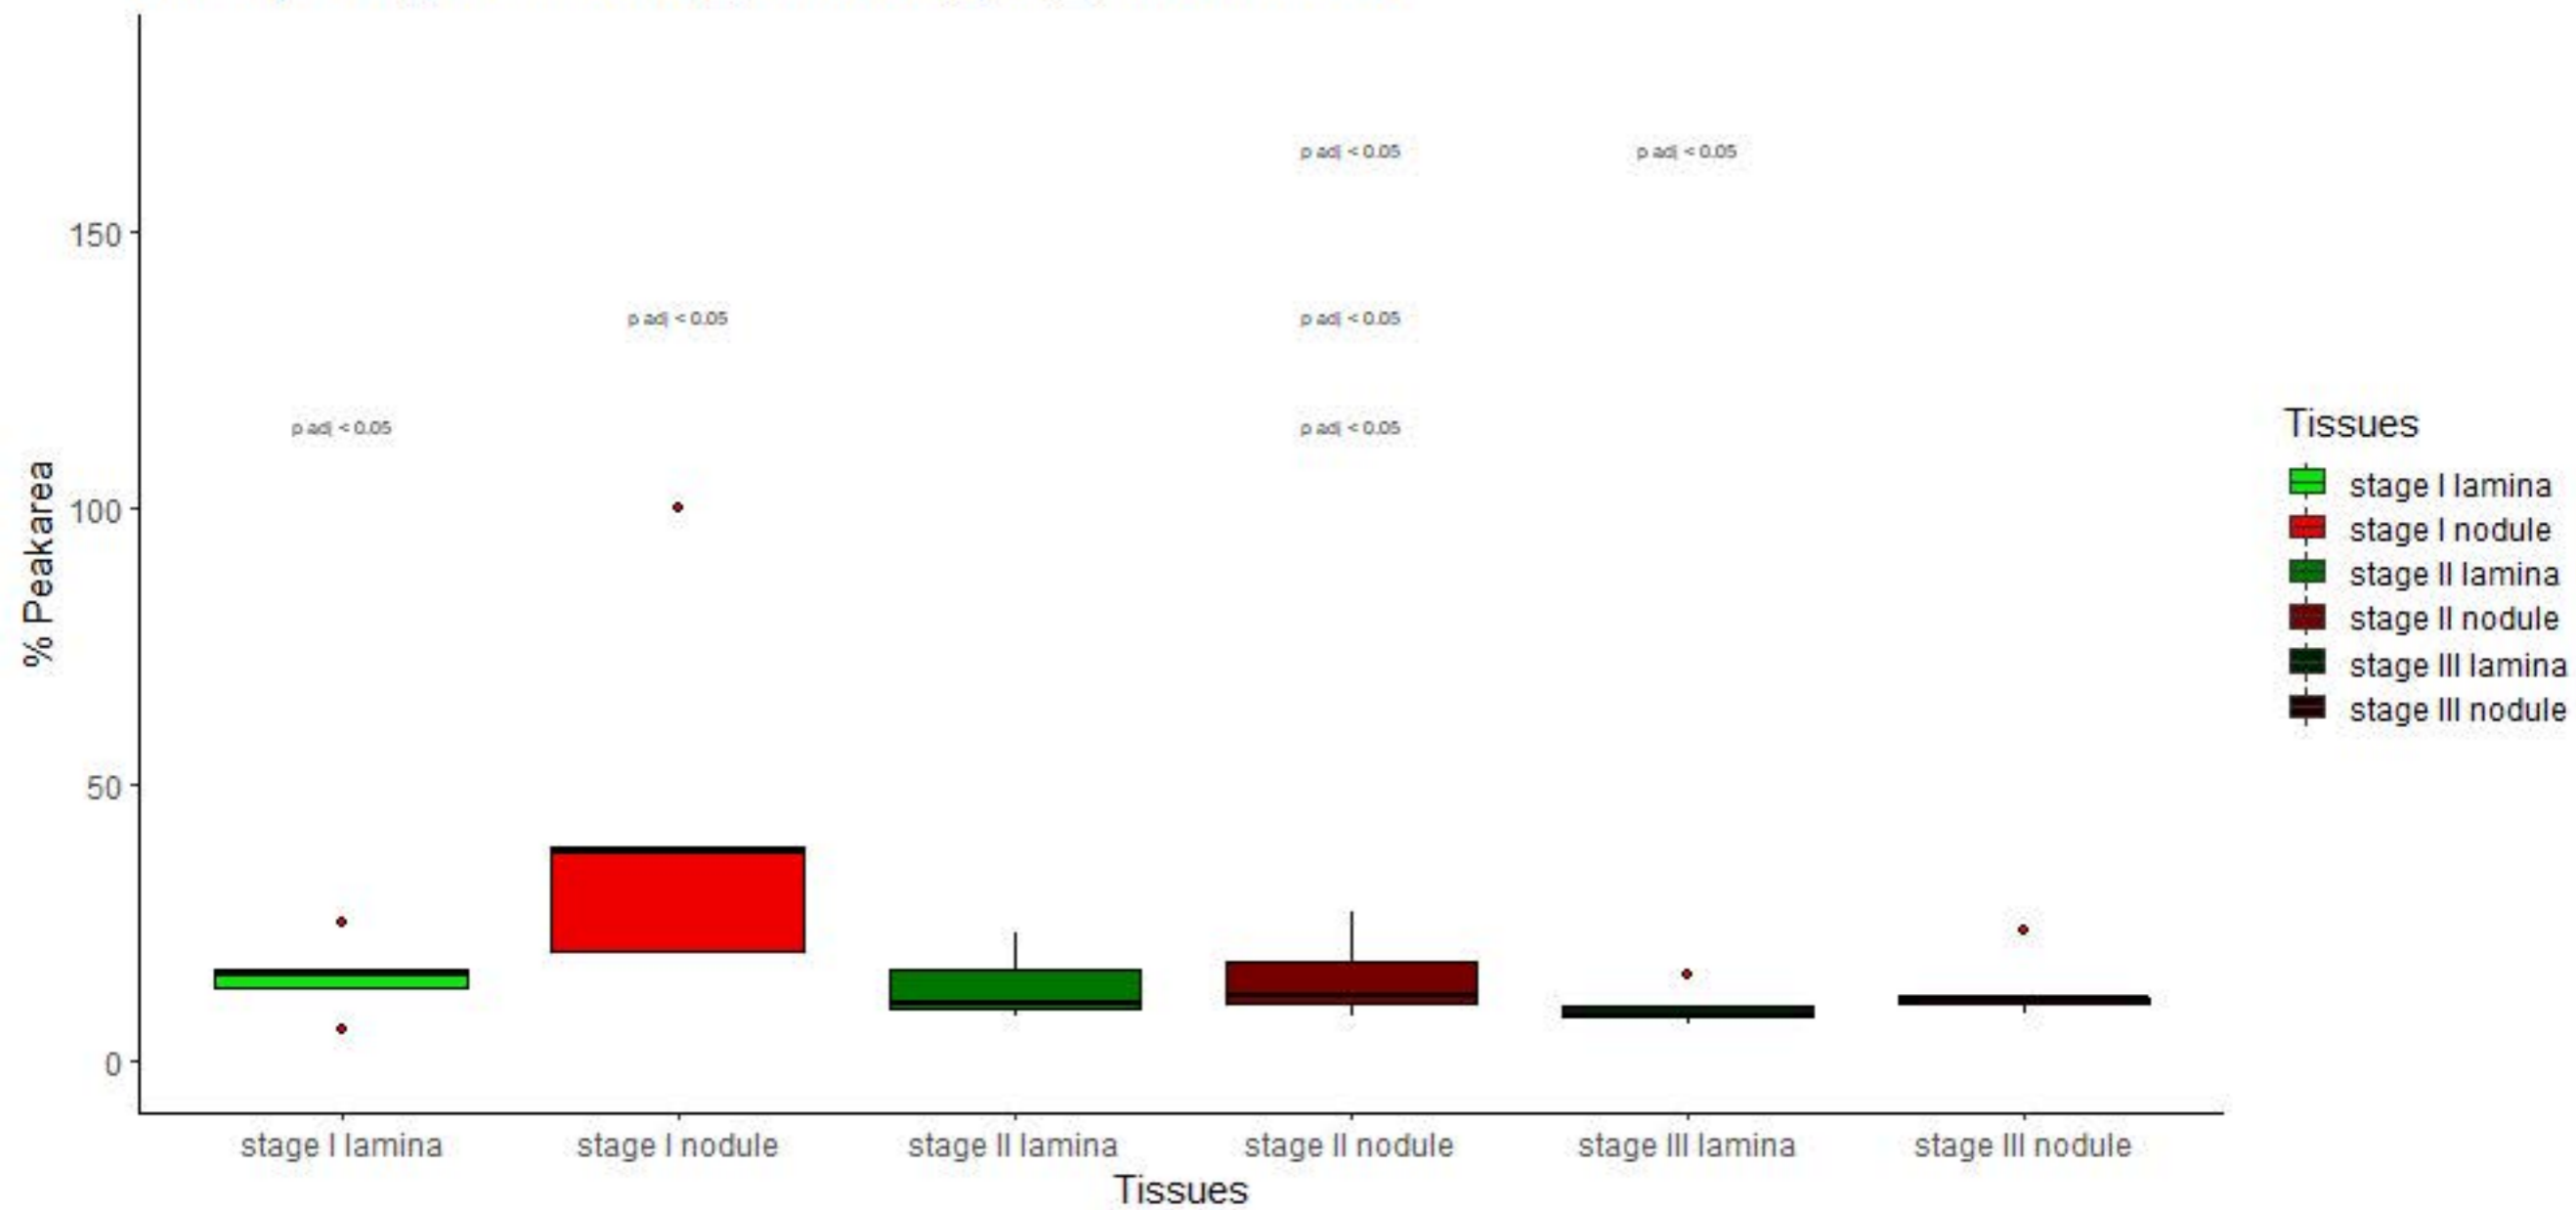



# Epigallocatechine\_RT:14.70\_min\_m/z:307.0812

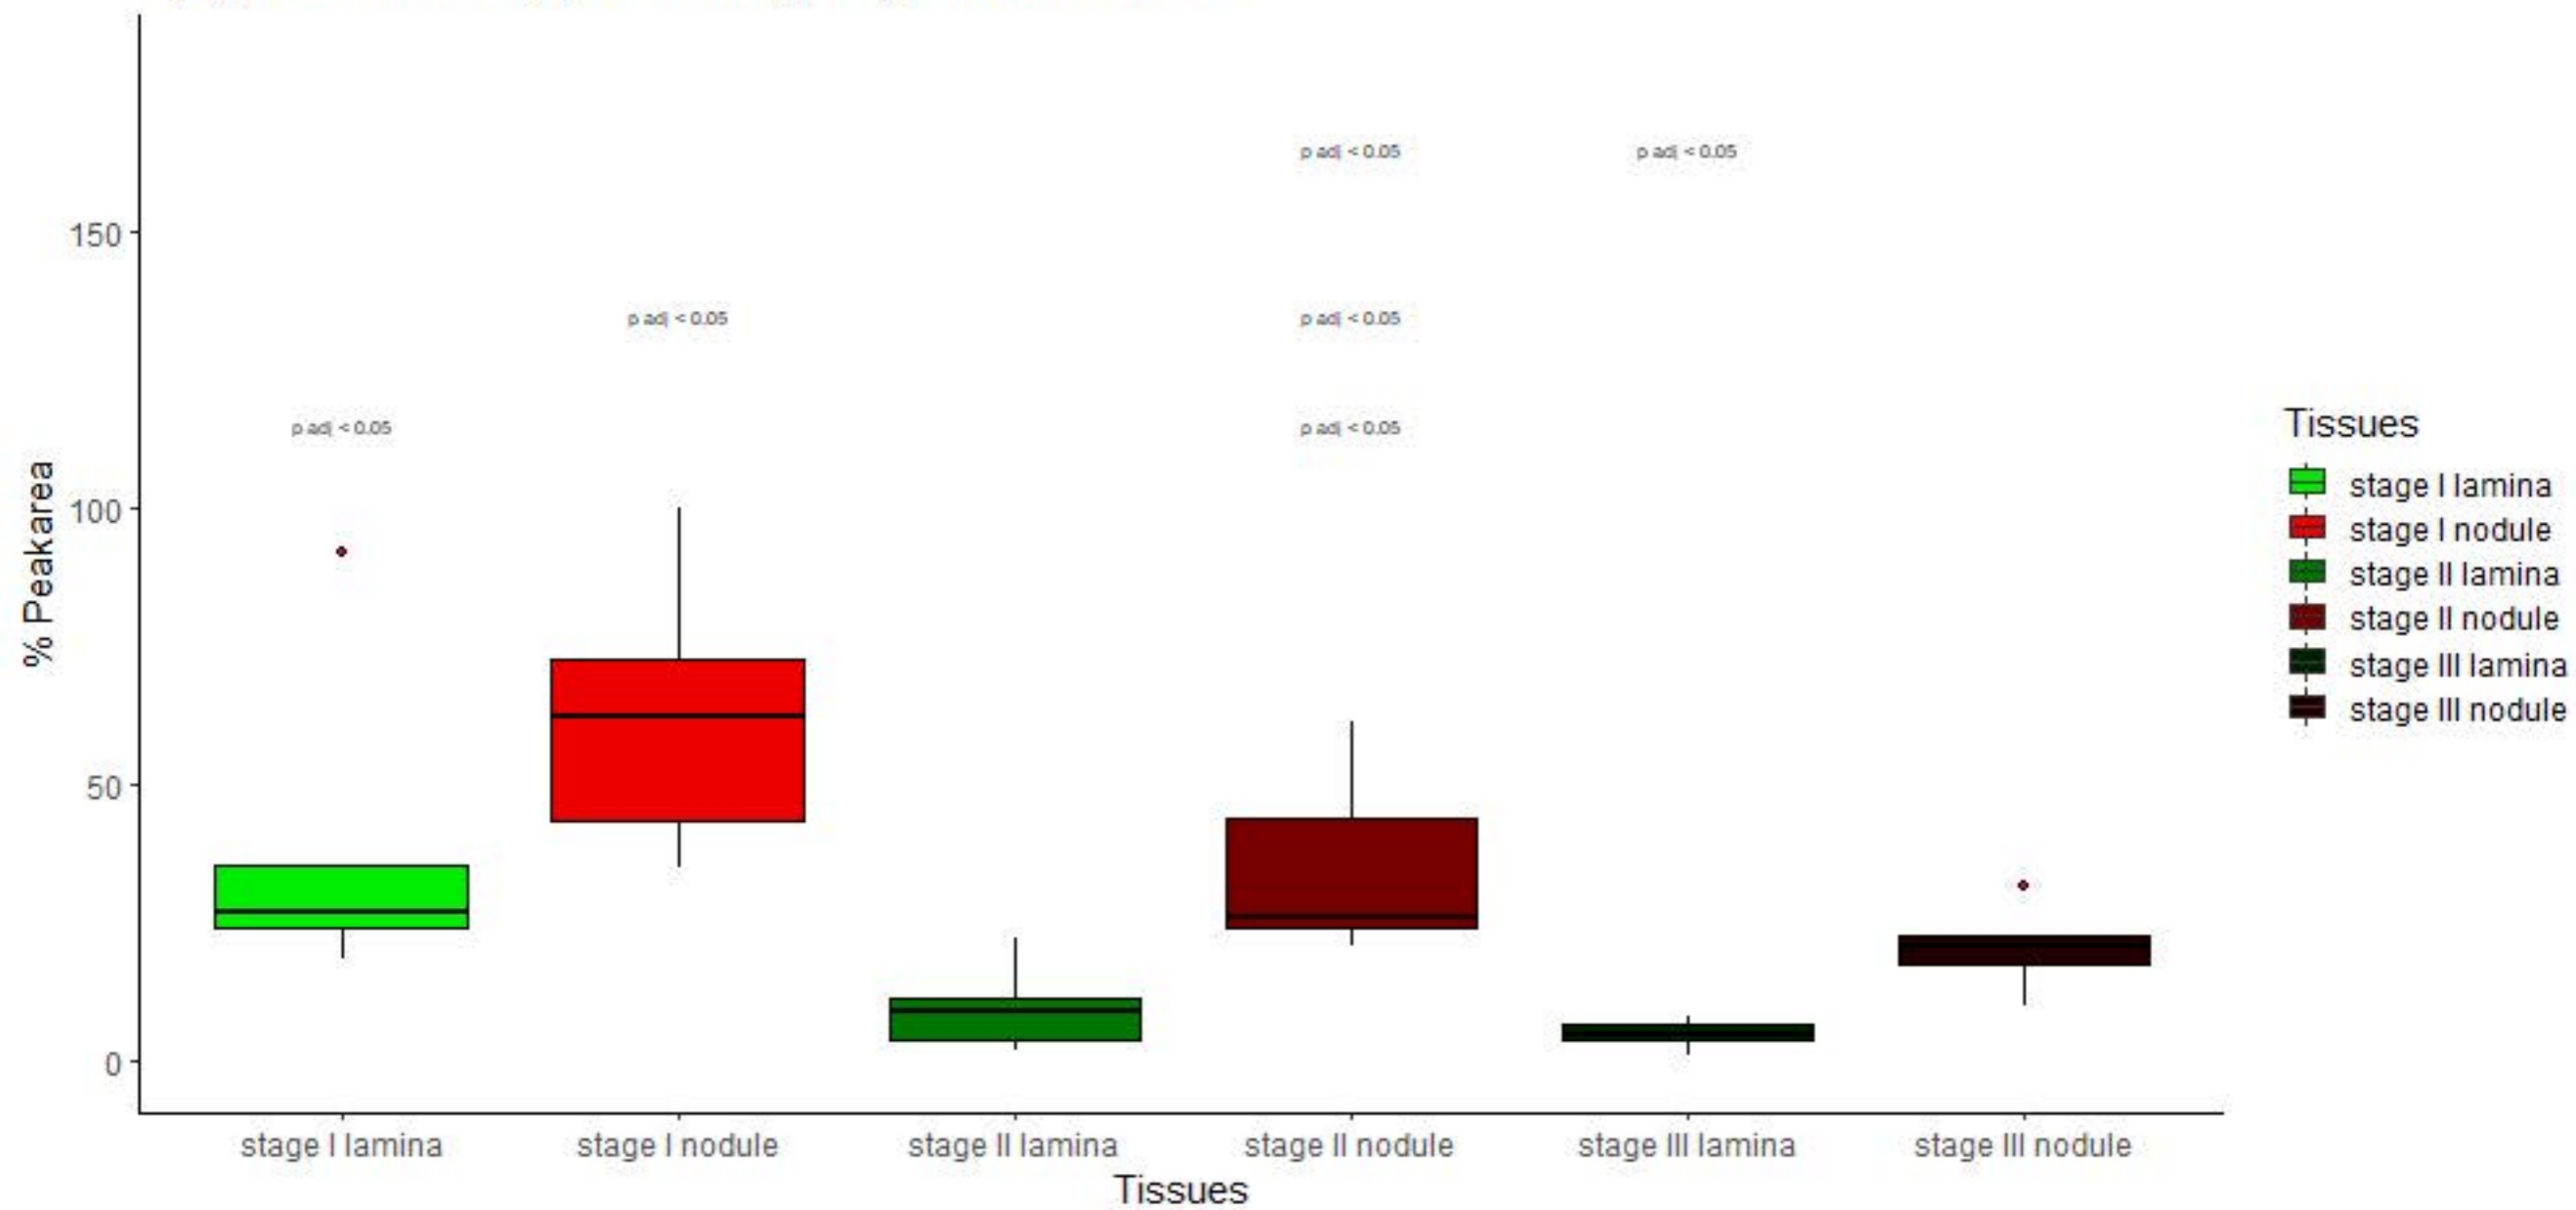

# Quercetin\_RT:20.24\_min\_m/z:303.0499

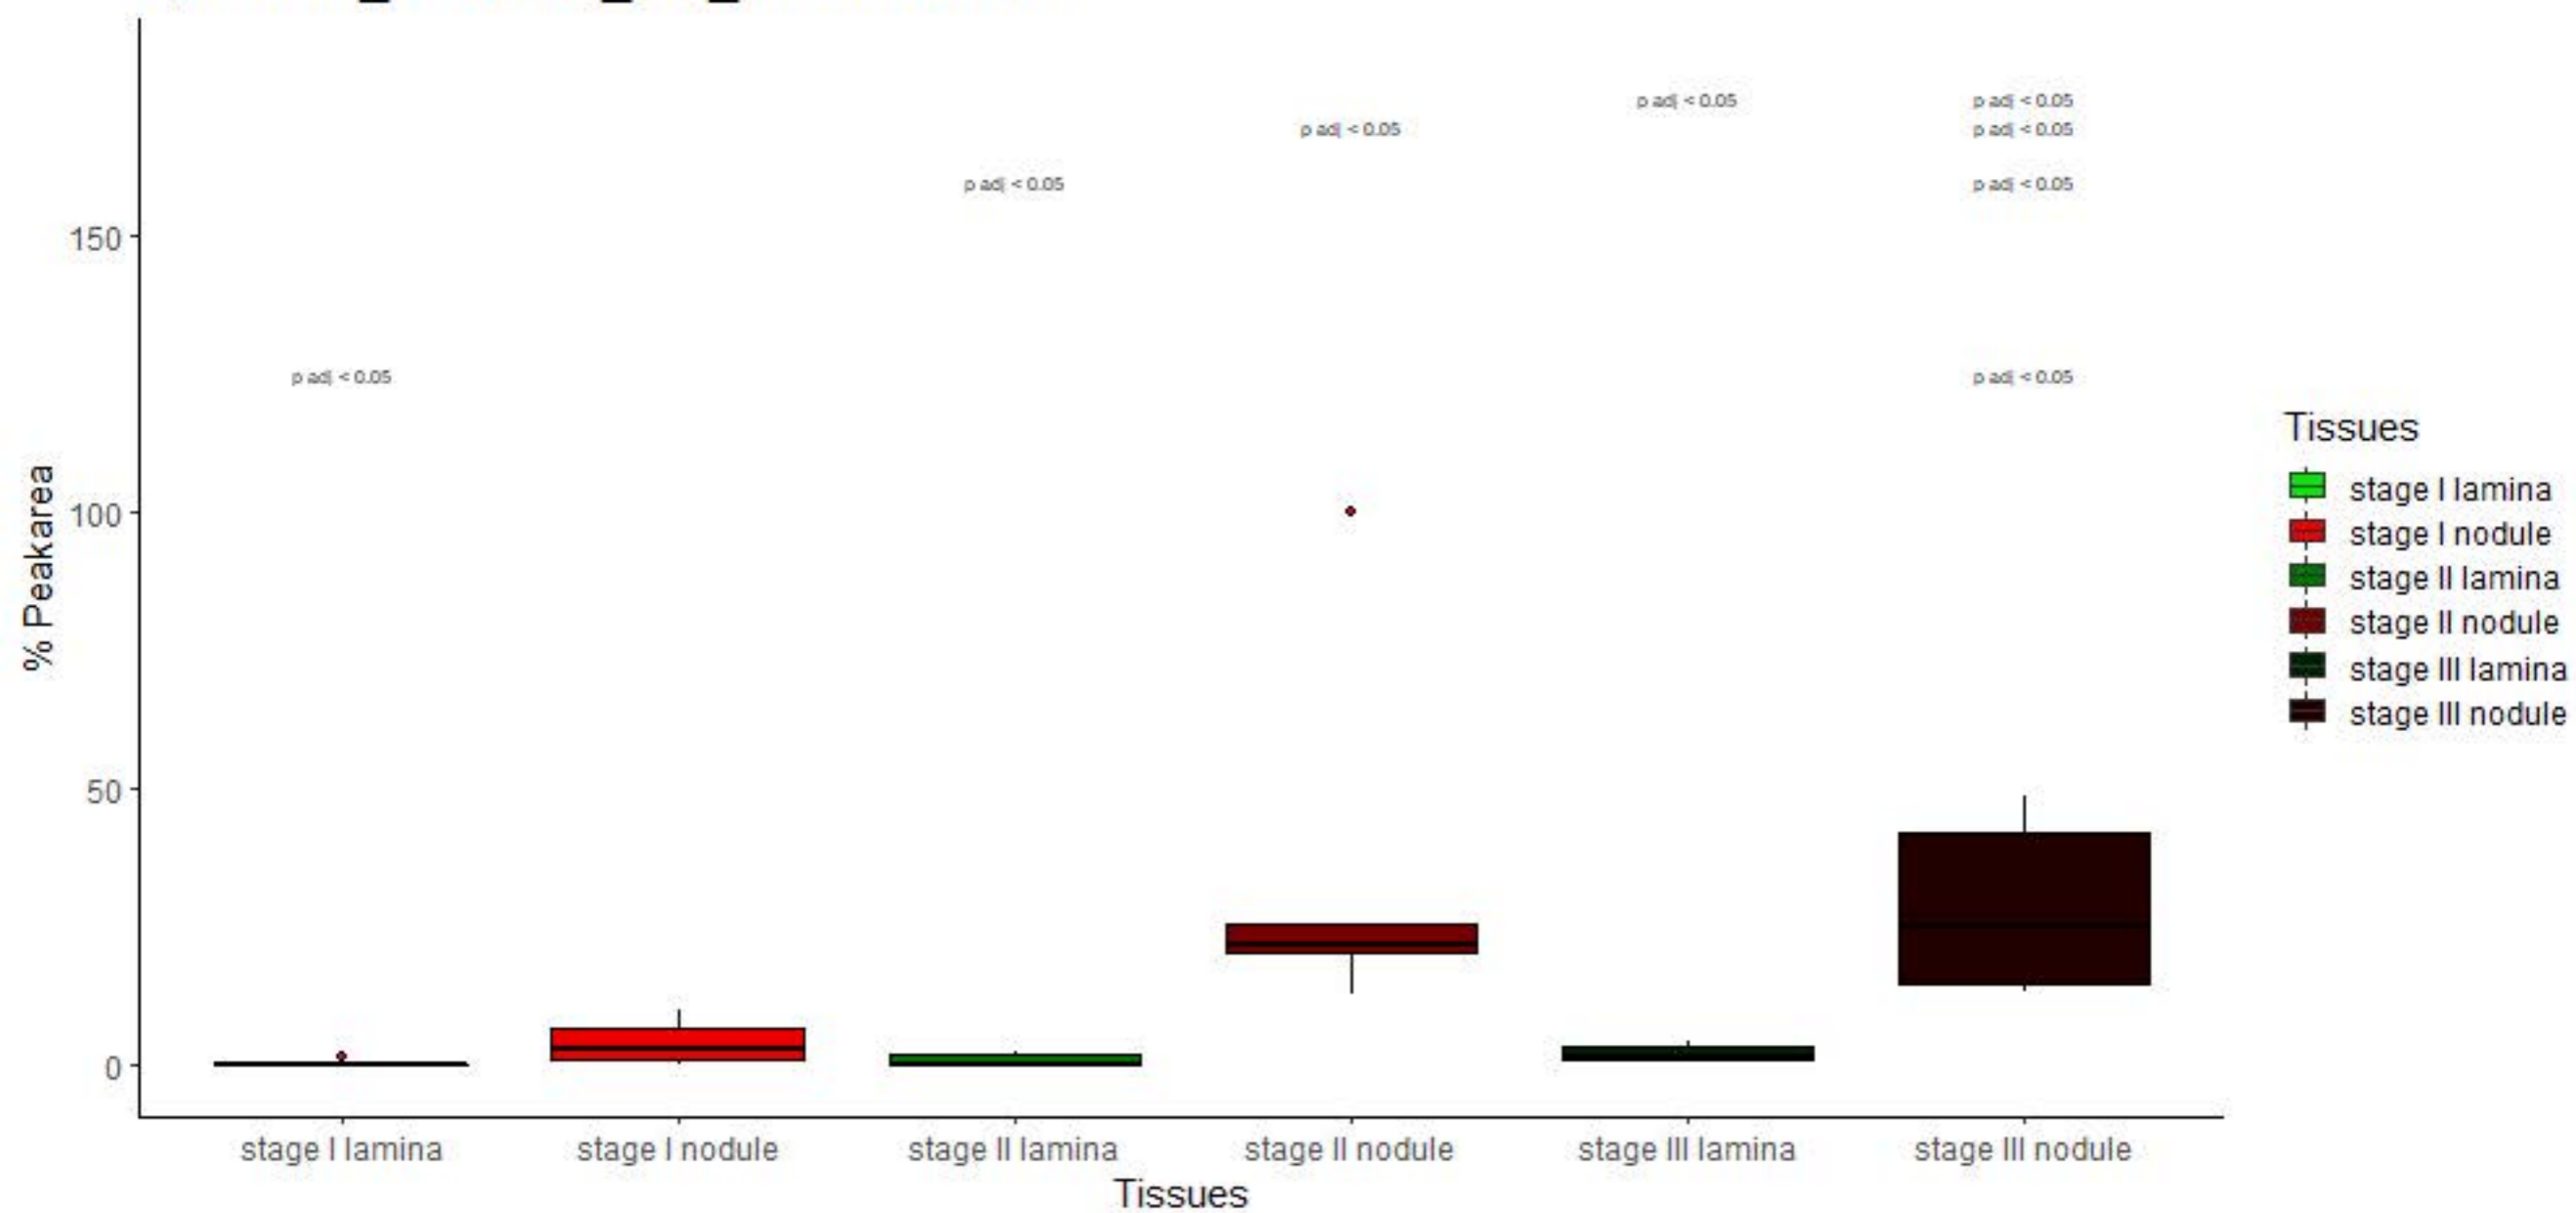

# Isoquercetin\_RT:20.20\_min\_m/z:465.1028

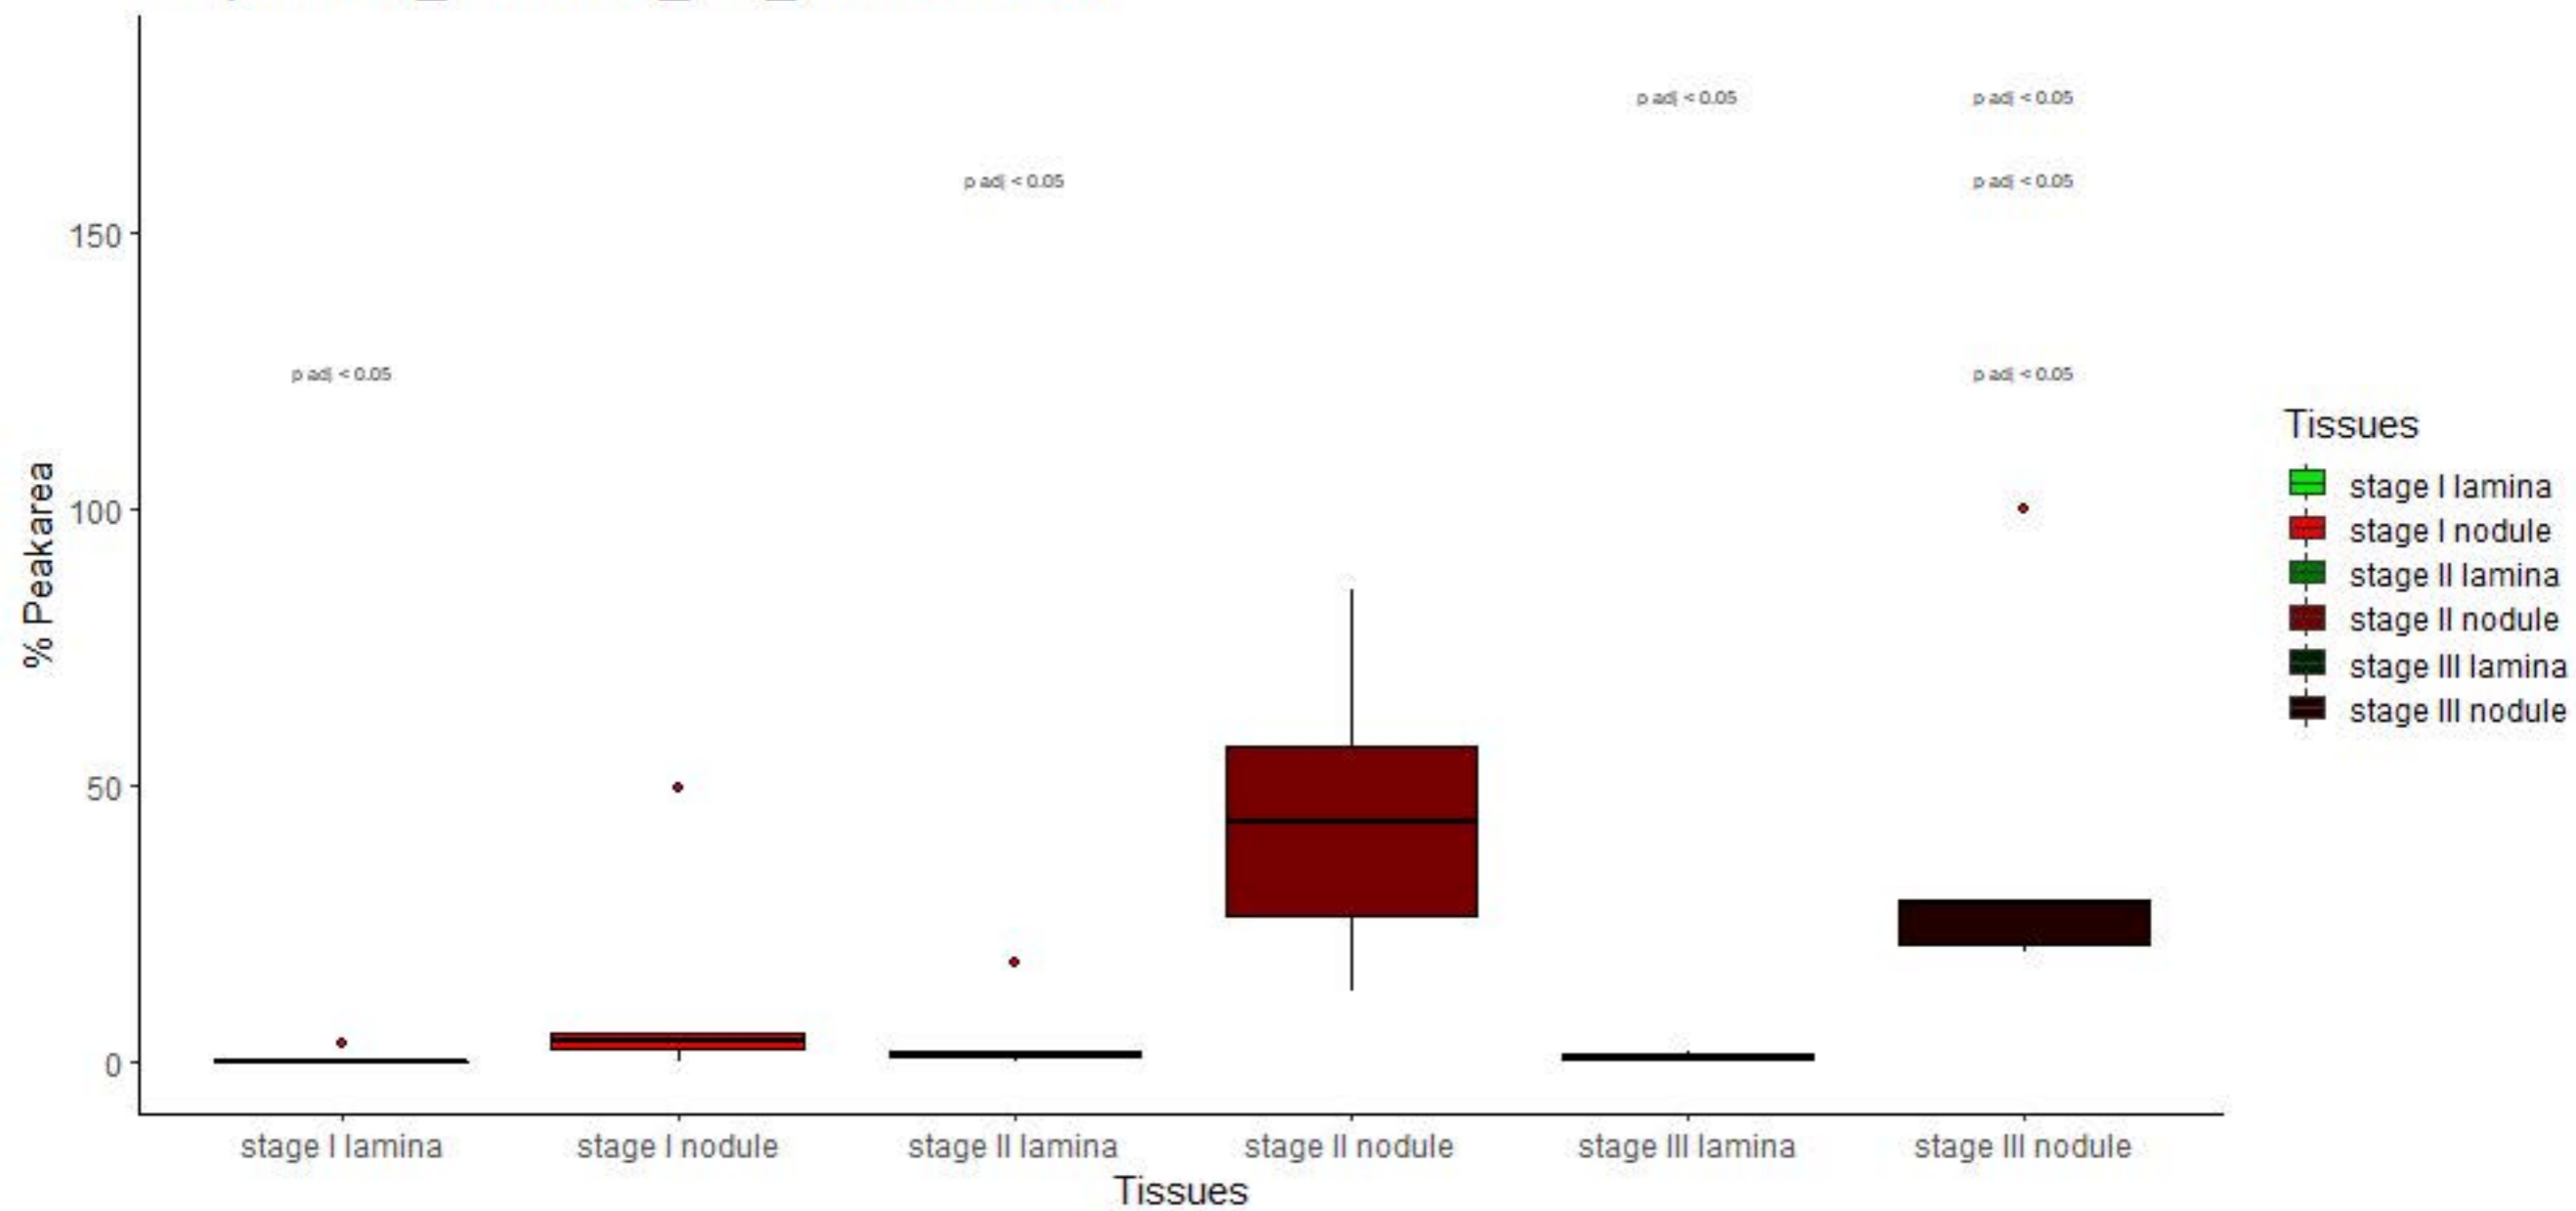

GSH\_RT:3.62\_min\_m/z:308.0911

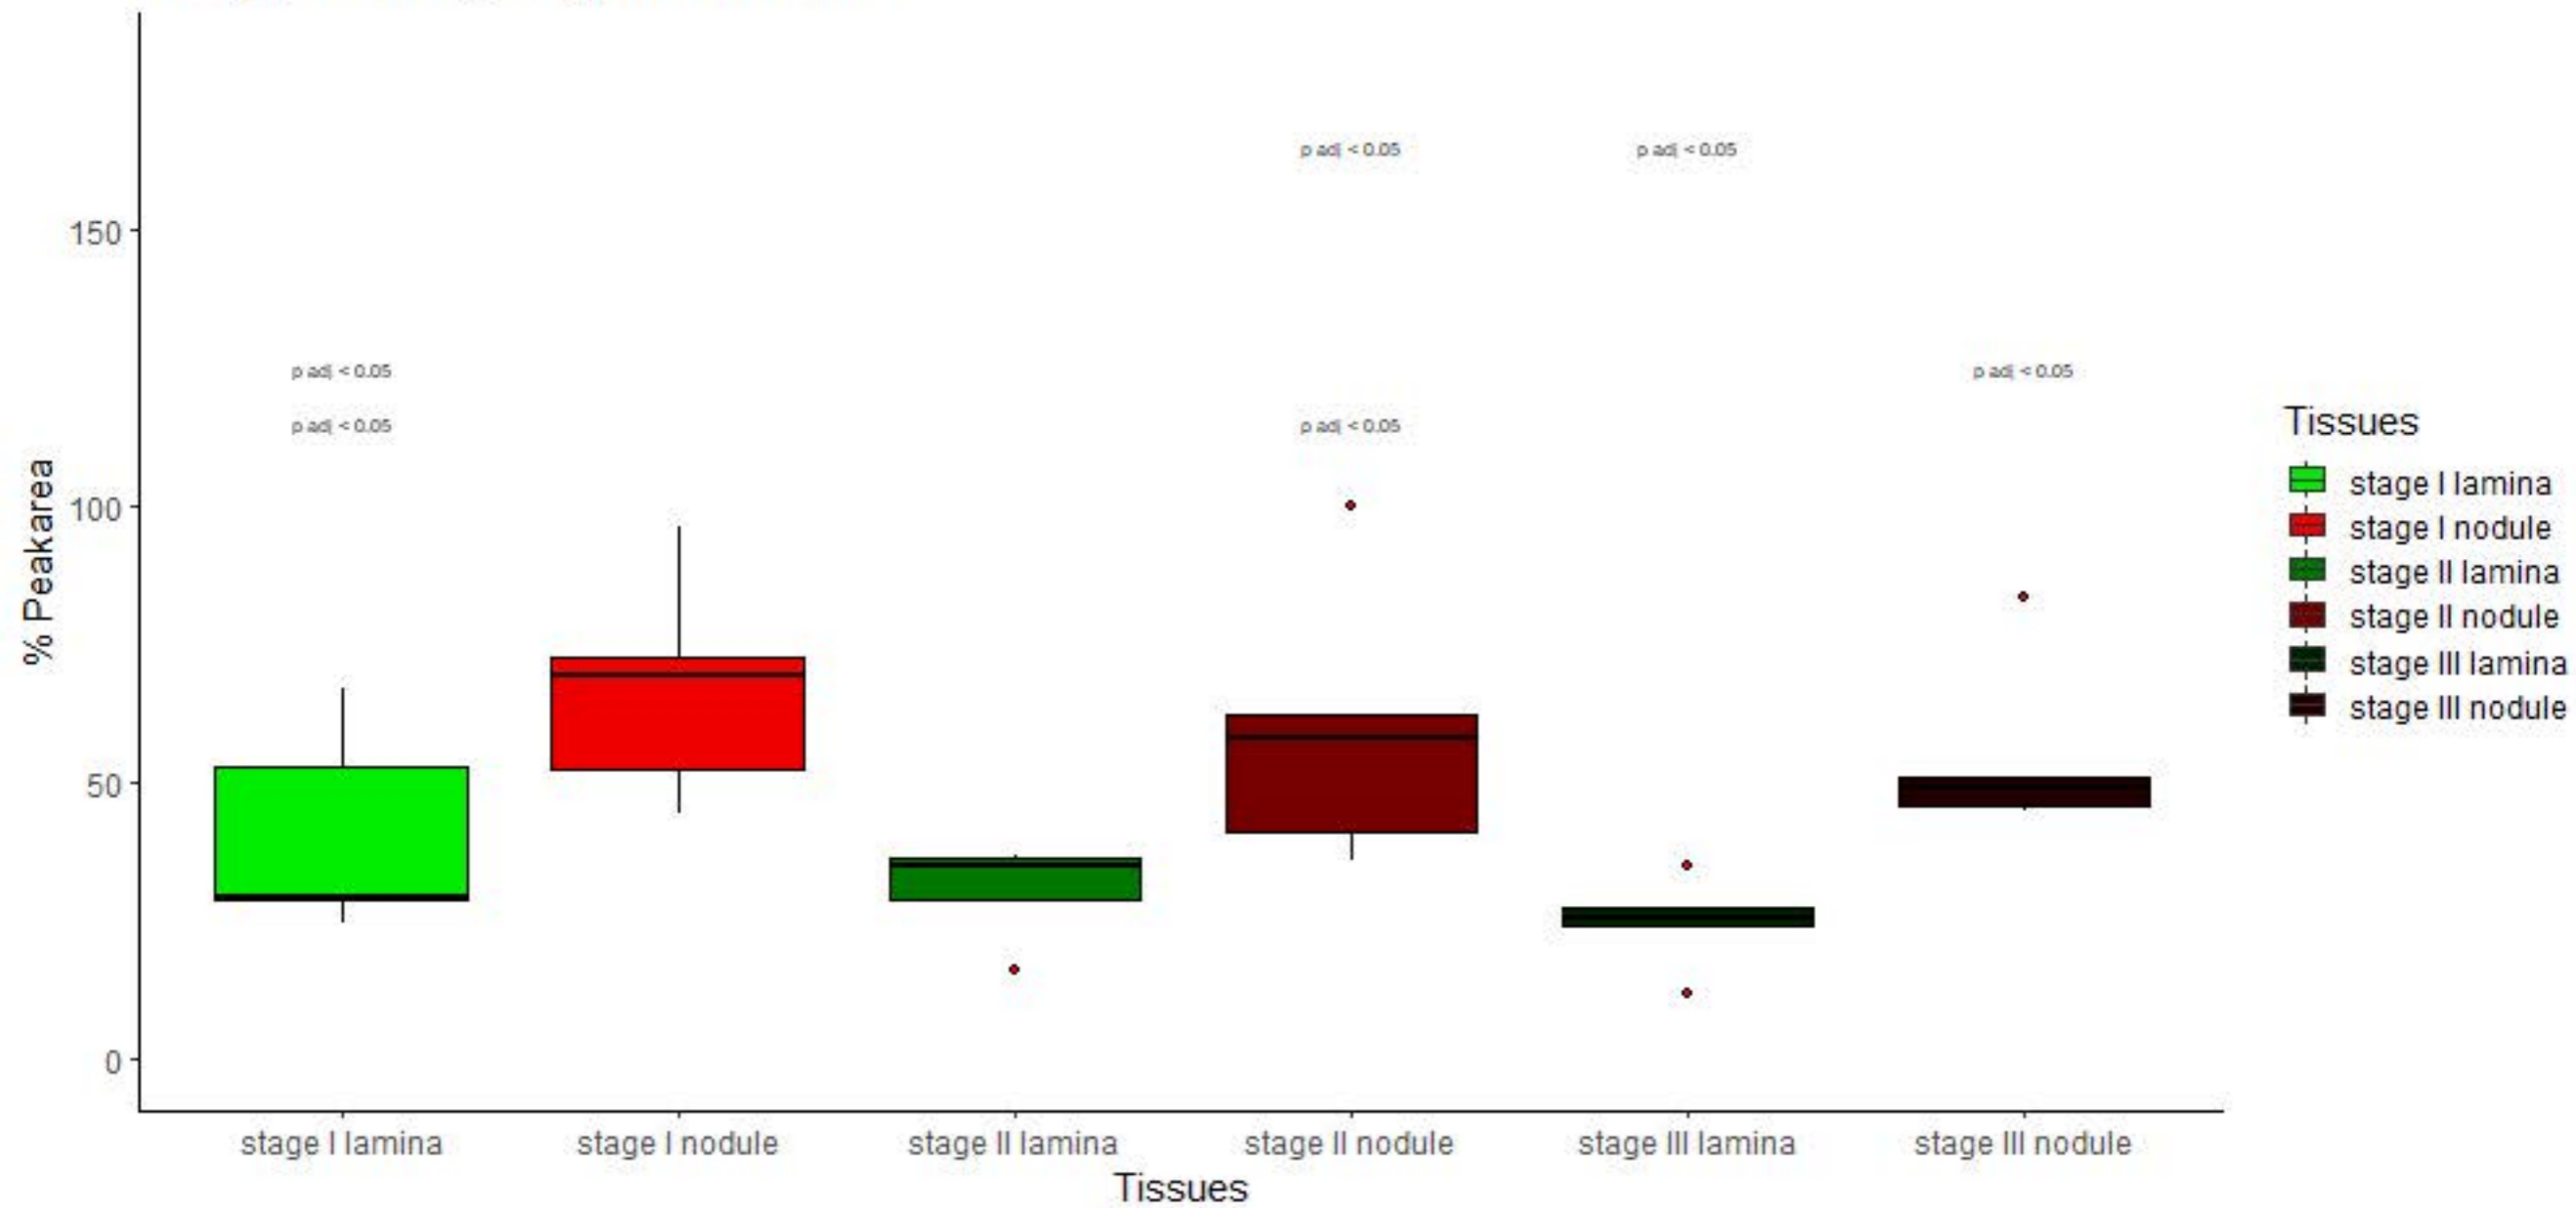

GSSG\_RT:6.09\_min\_m/z:613.1592

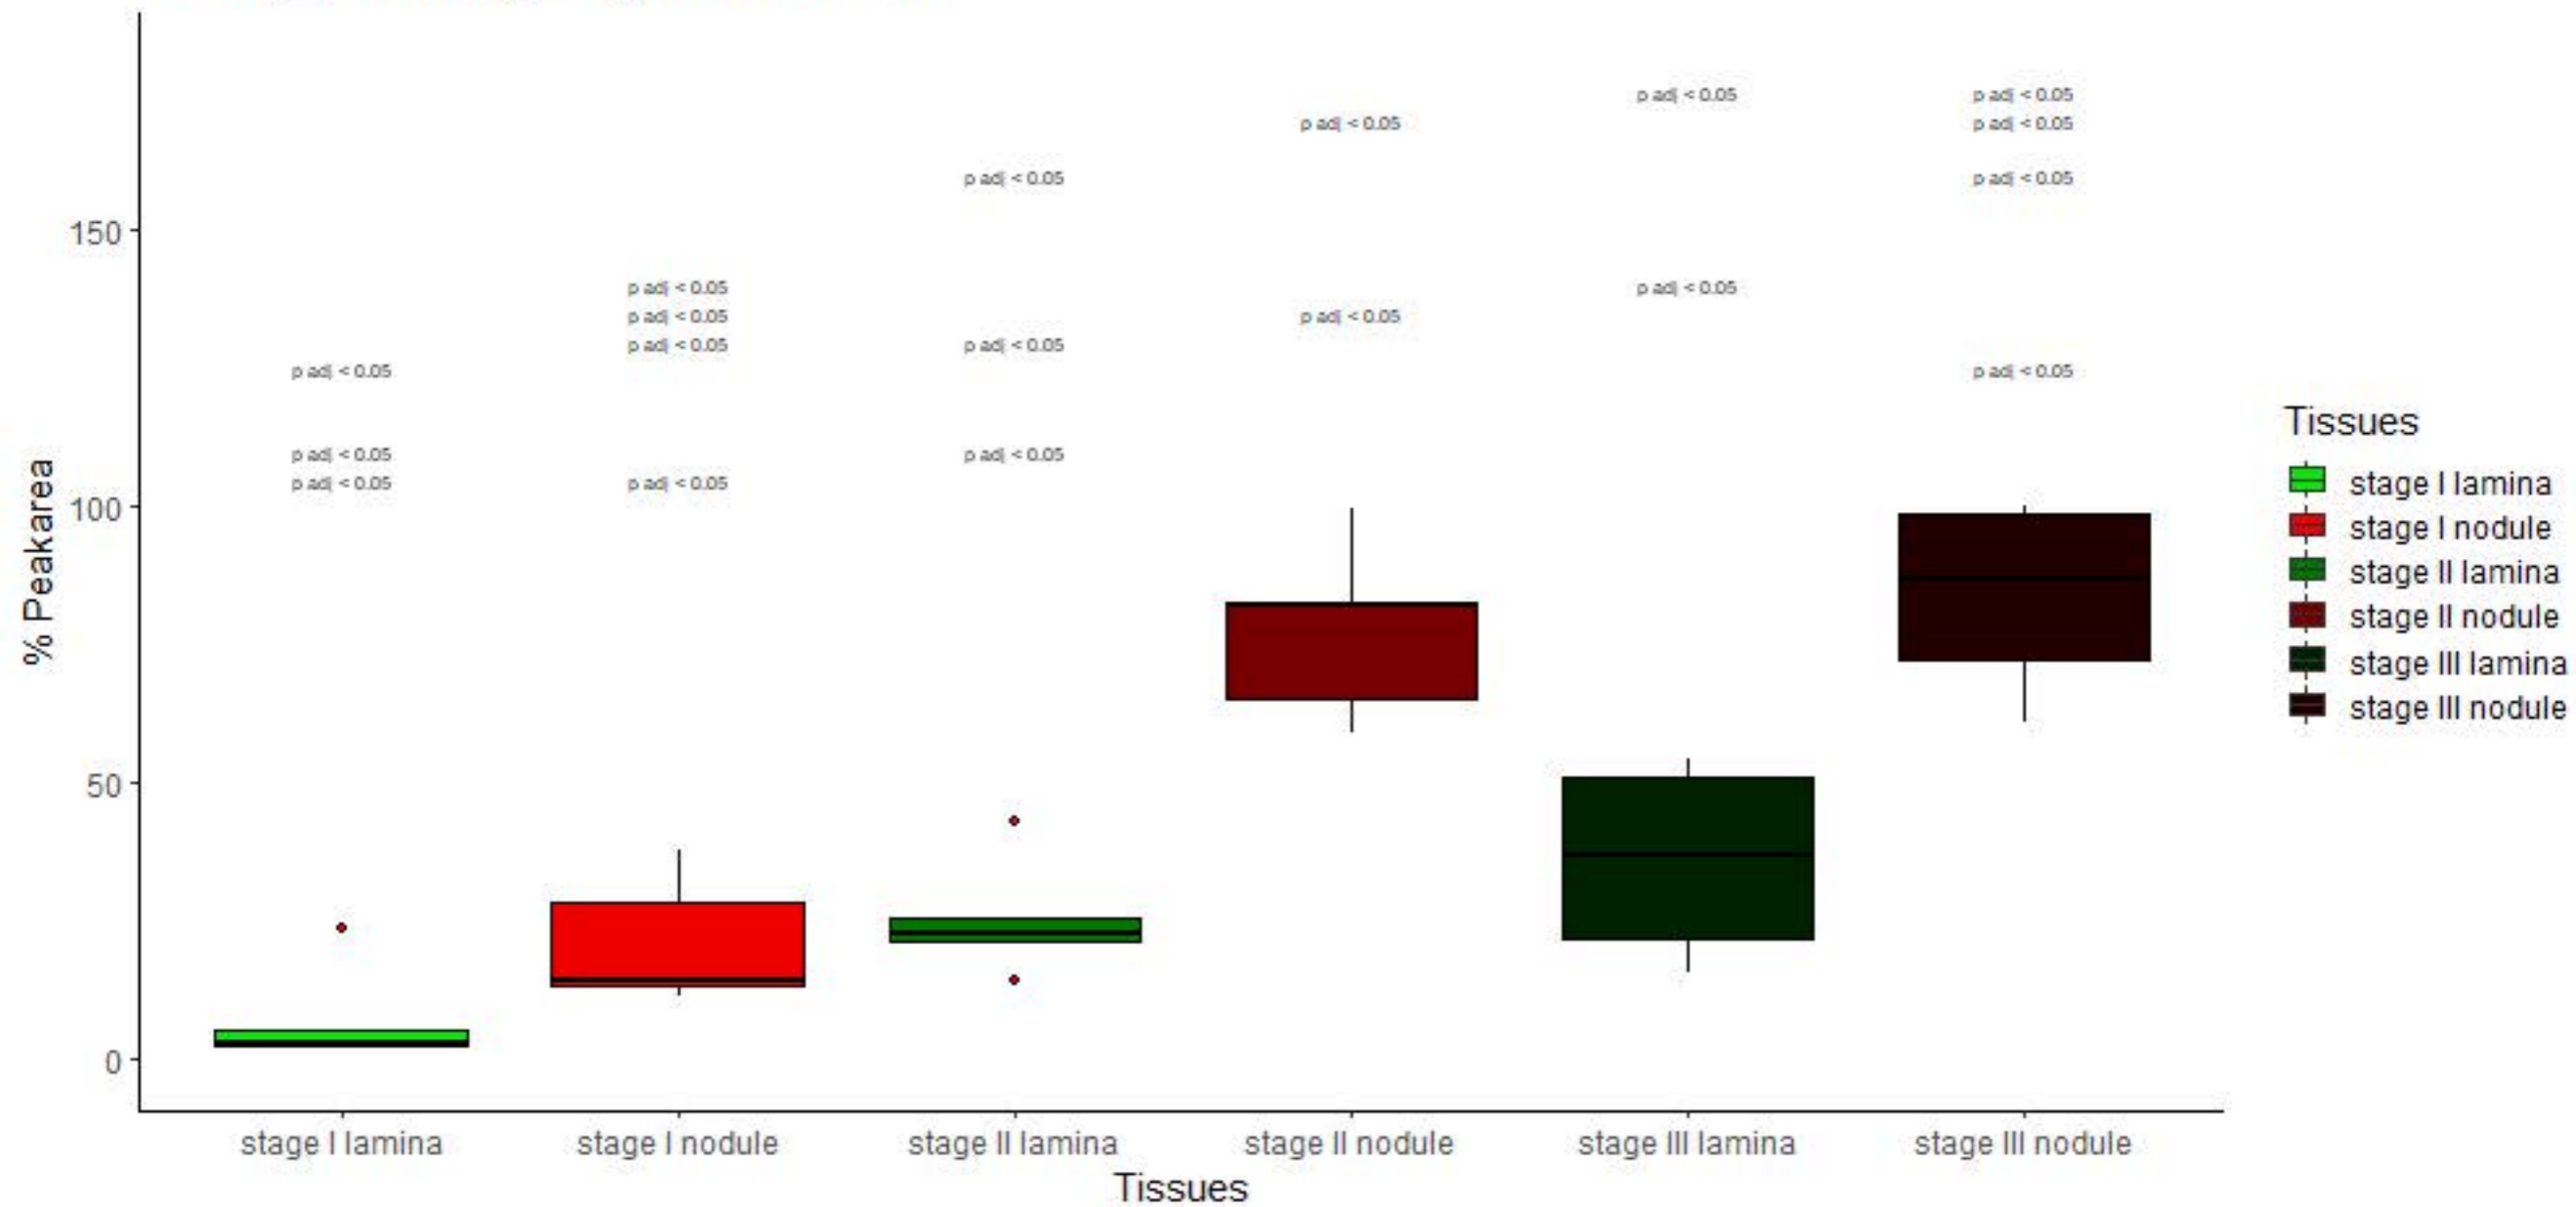

# Ophthalmic\_acid\_RT:4.05\_min\_m/z:290.1347

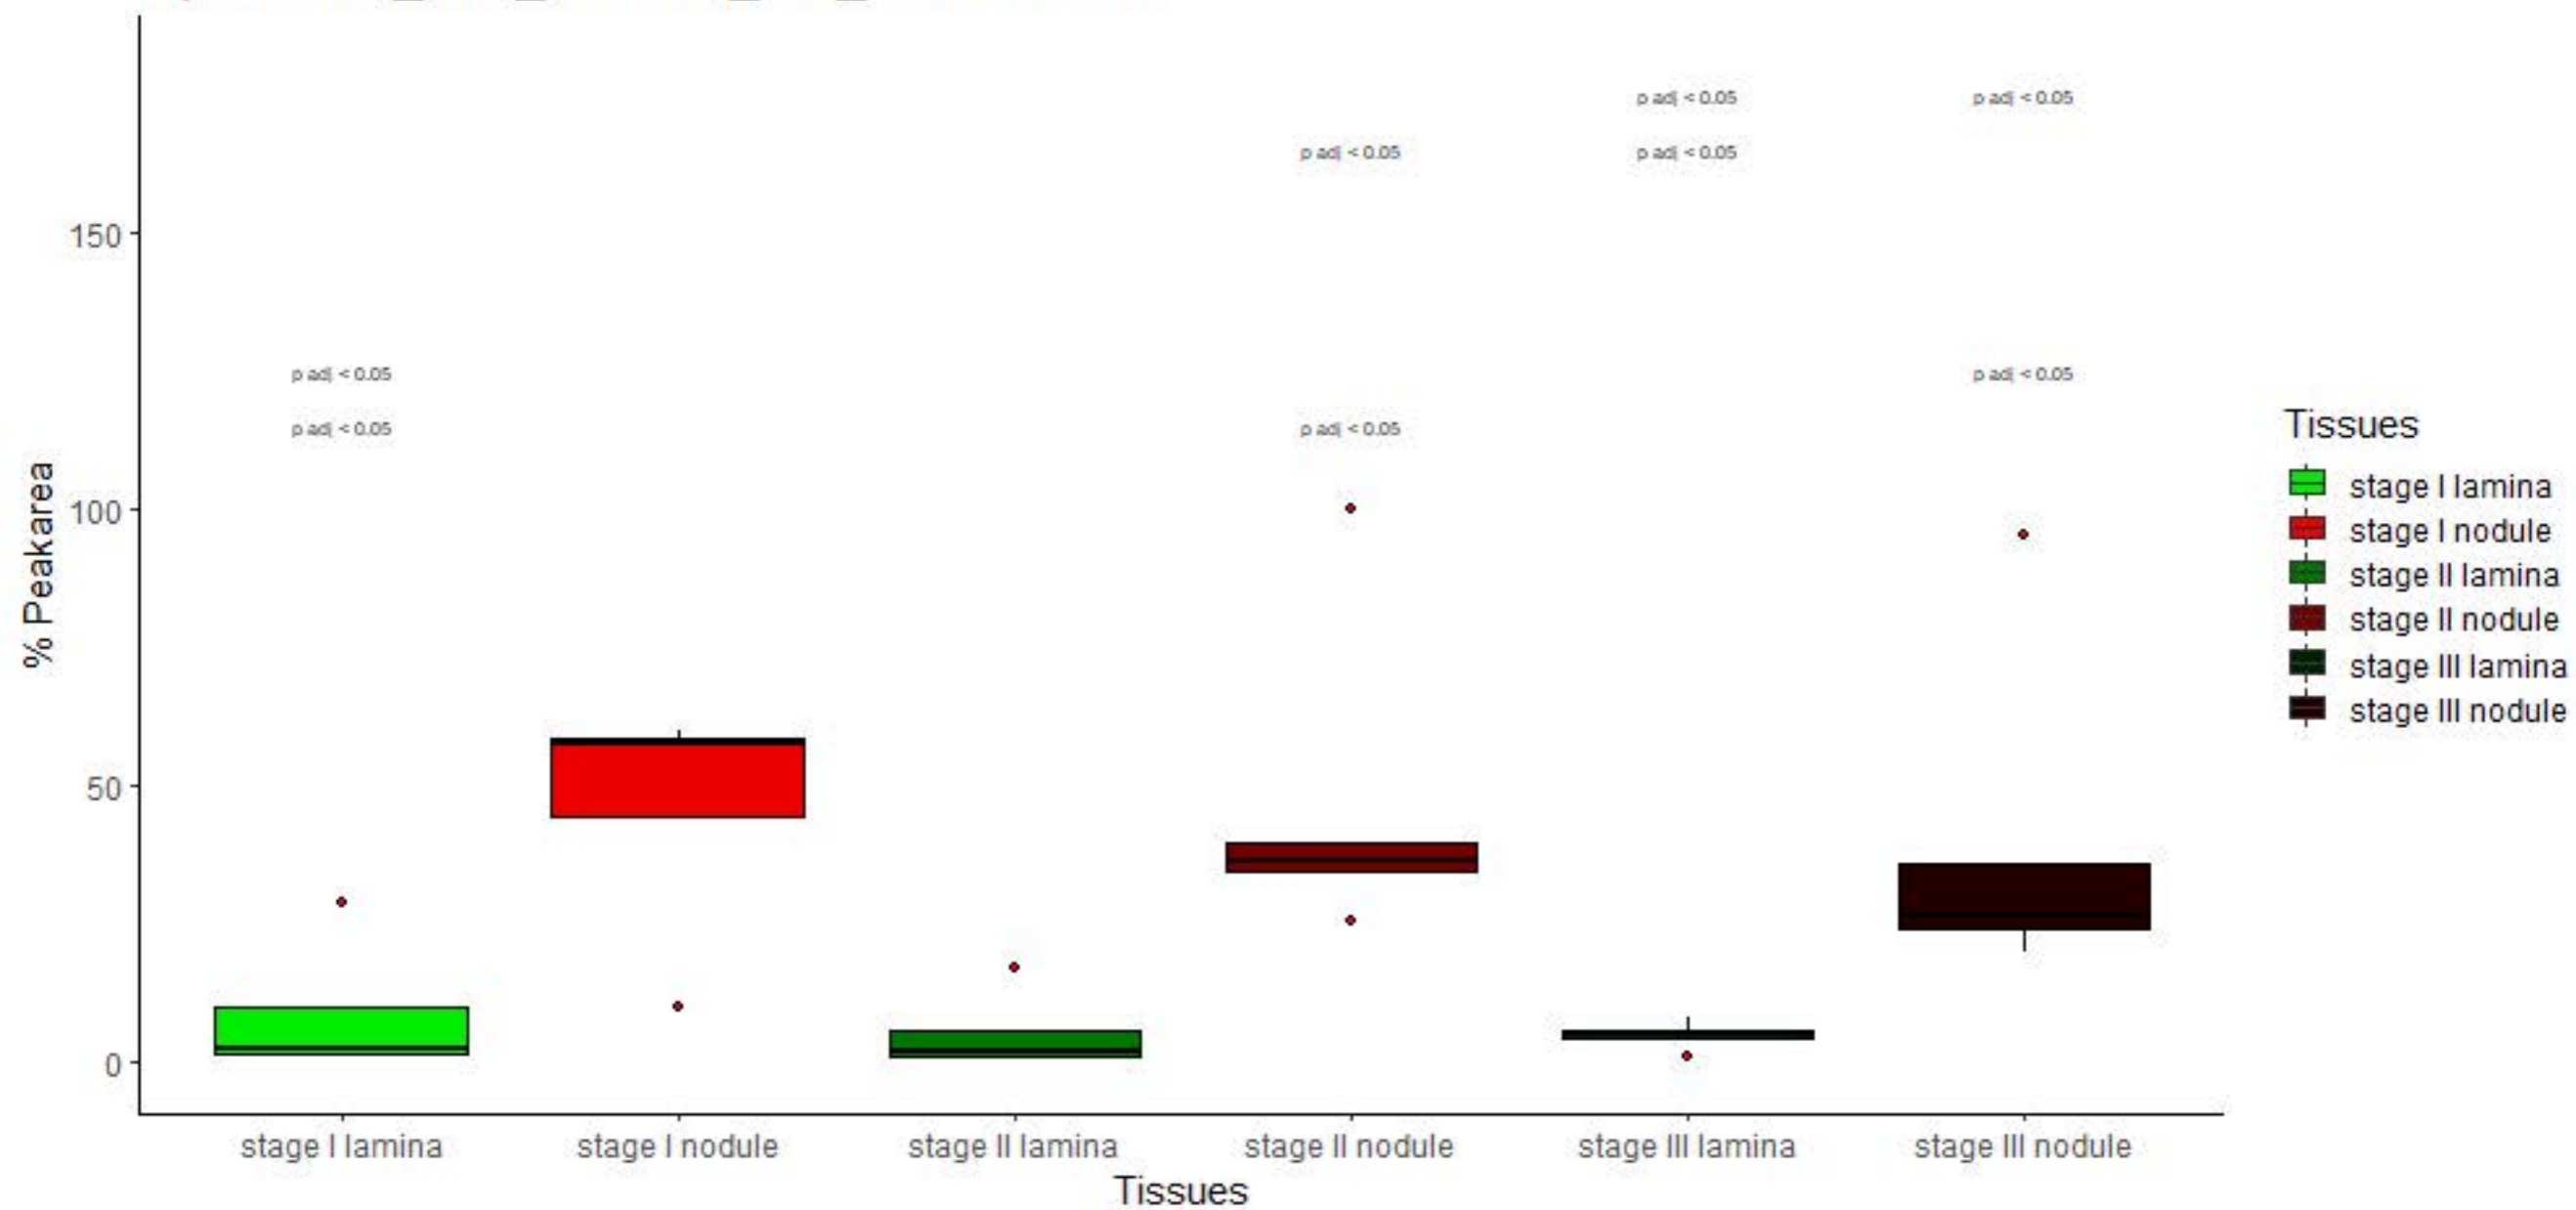

# Glutamic\_acid\_RT:2.38\_min\_m/z:148.0604

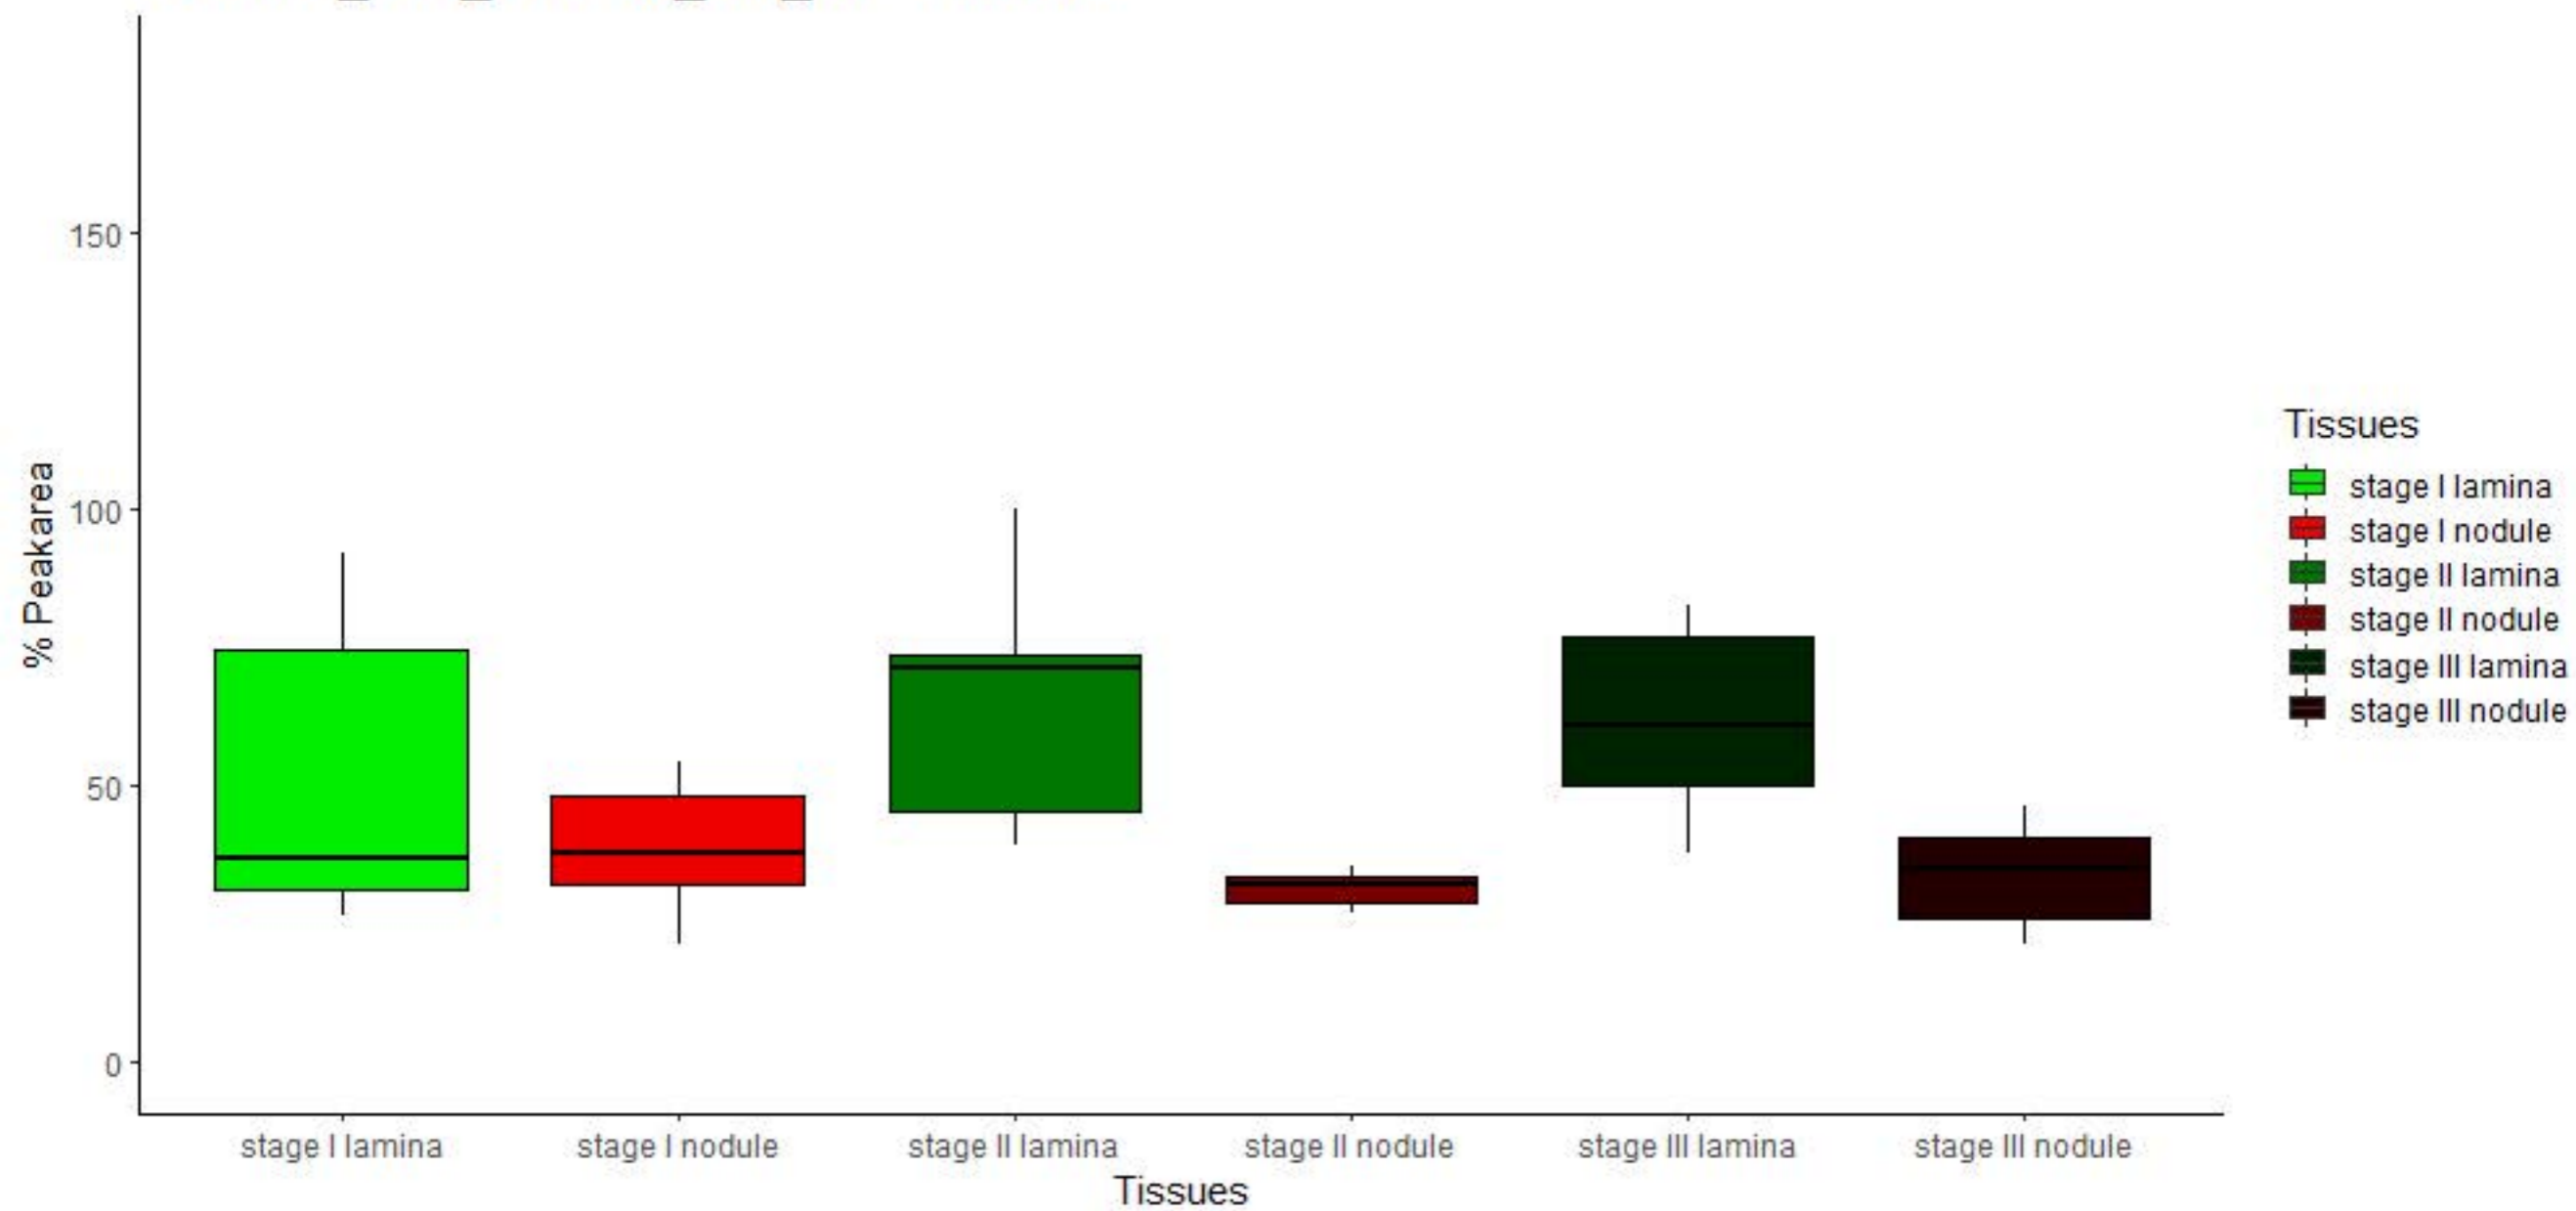

# Spermidine\_RT:2.24\_min\_m/z:146.1652

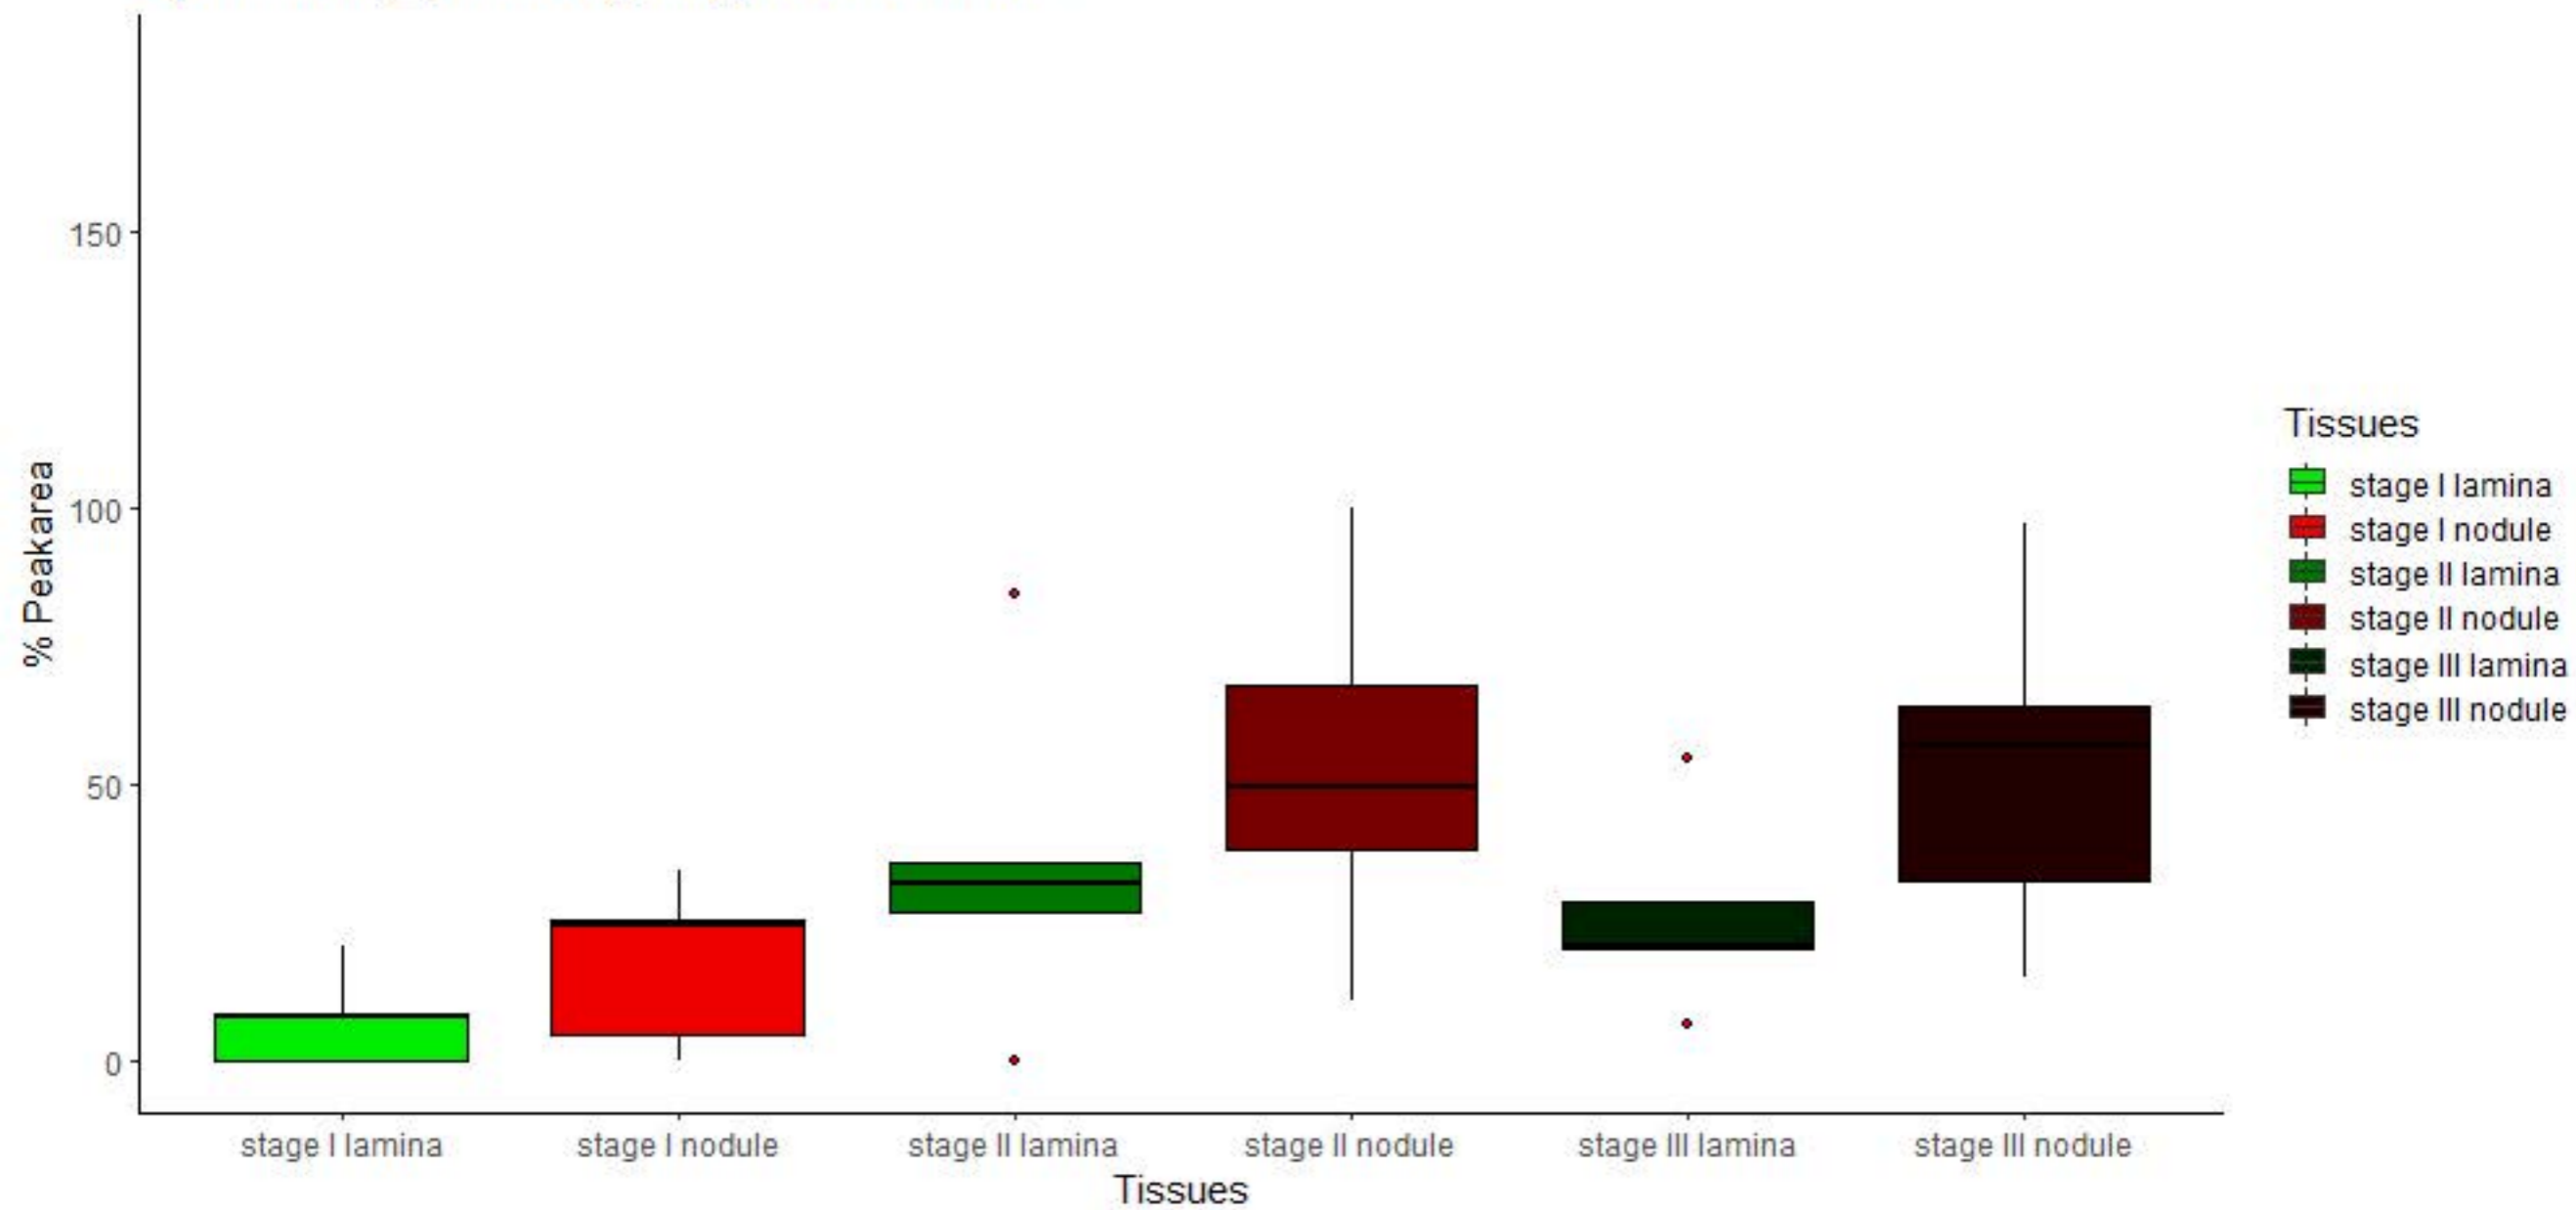



Proline\_RT:2.47\_min\_m/z:116.0706

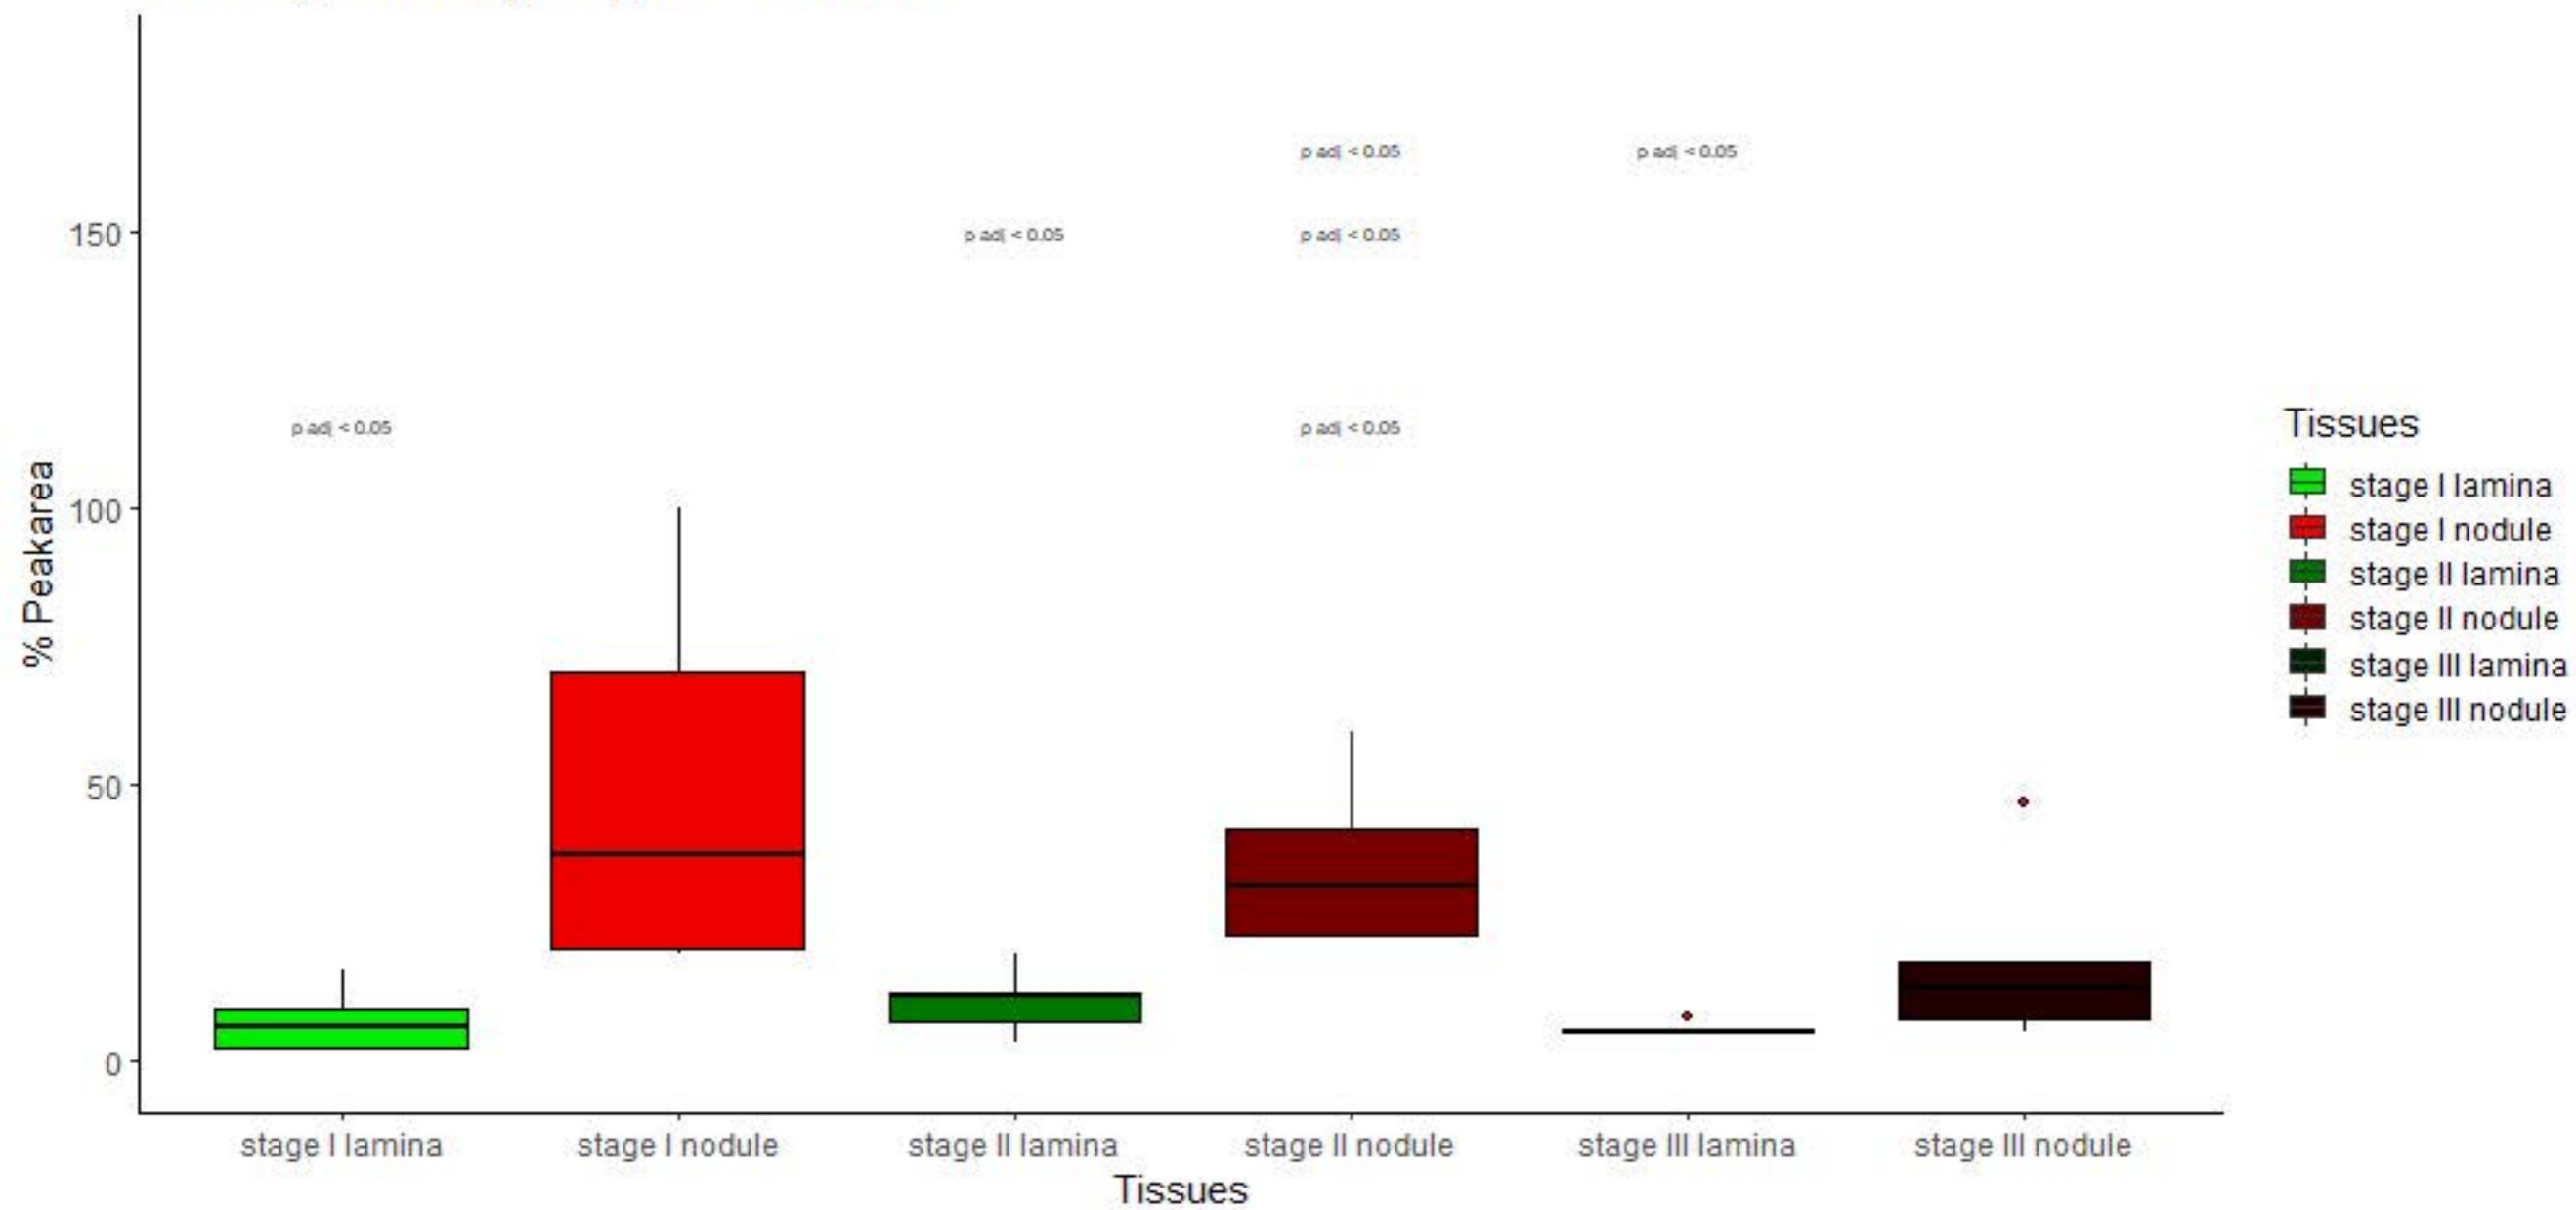

# Trimethyllysine\_RT:2.18\_min\_m/z:189.1598

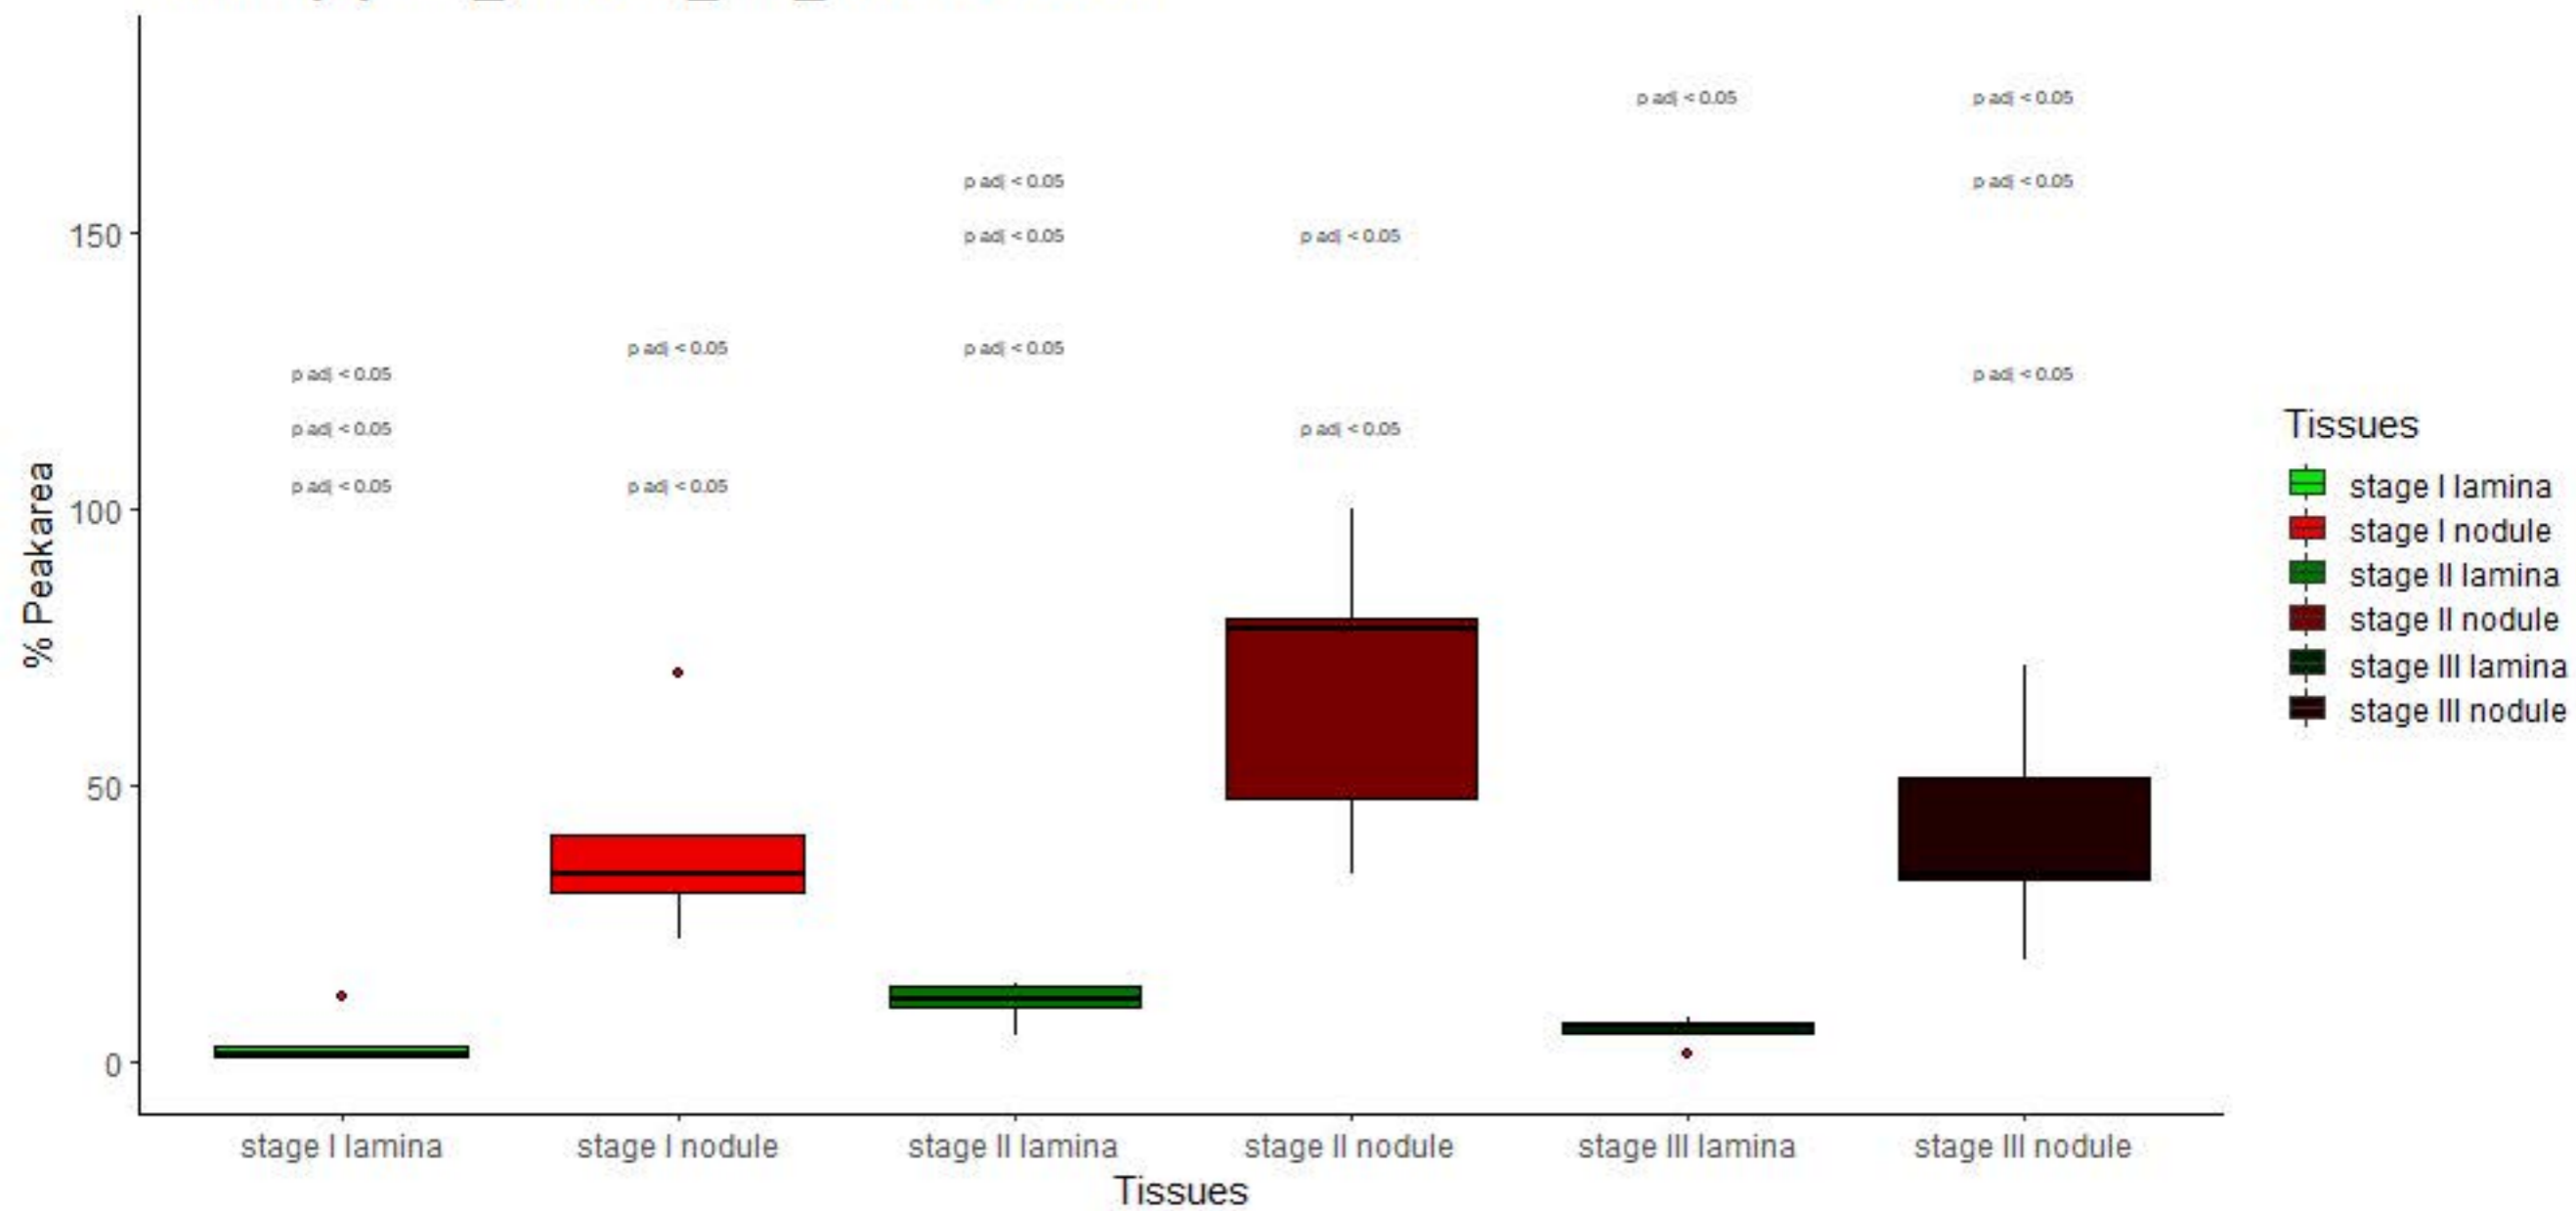

## Tryptophan\_RT:16.29\_min\_m/z:205.0972

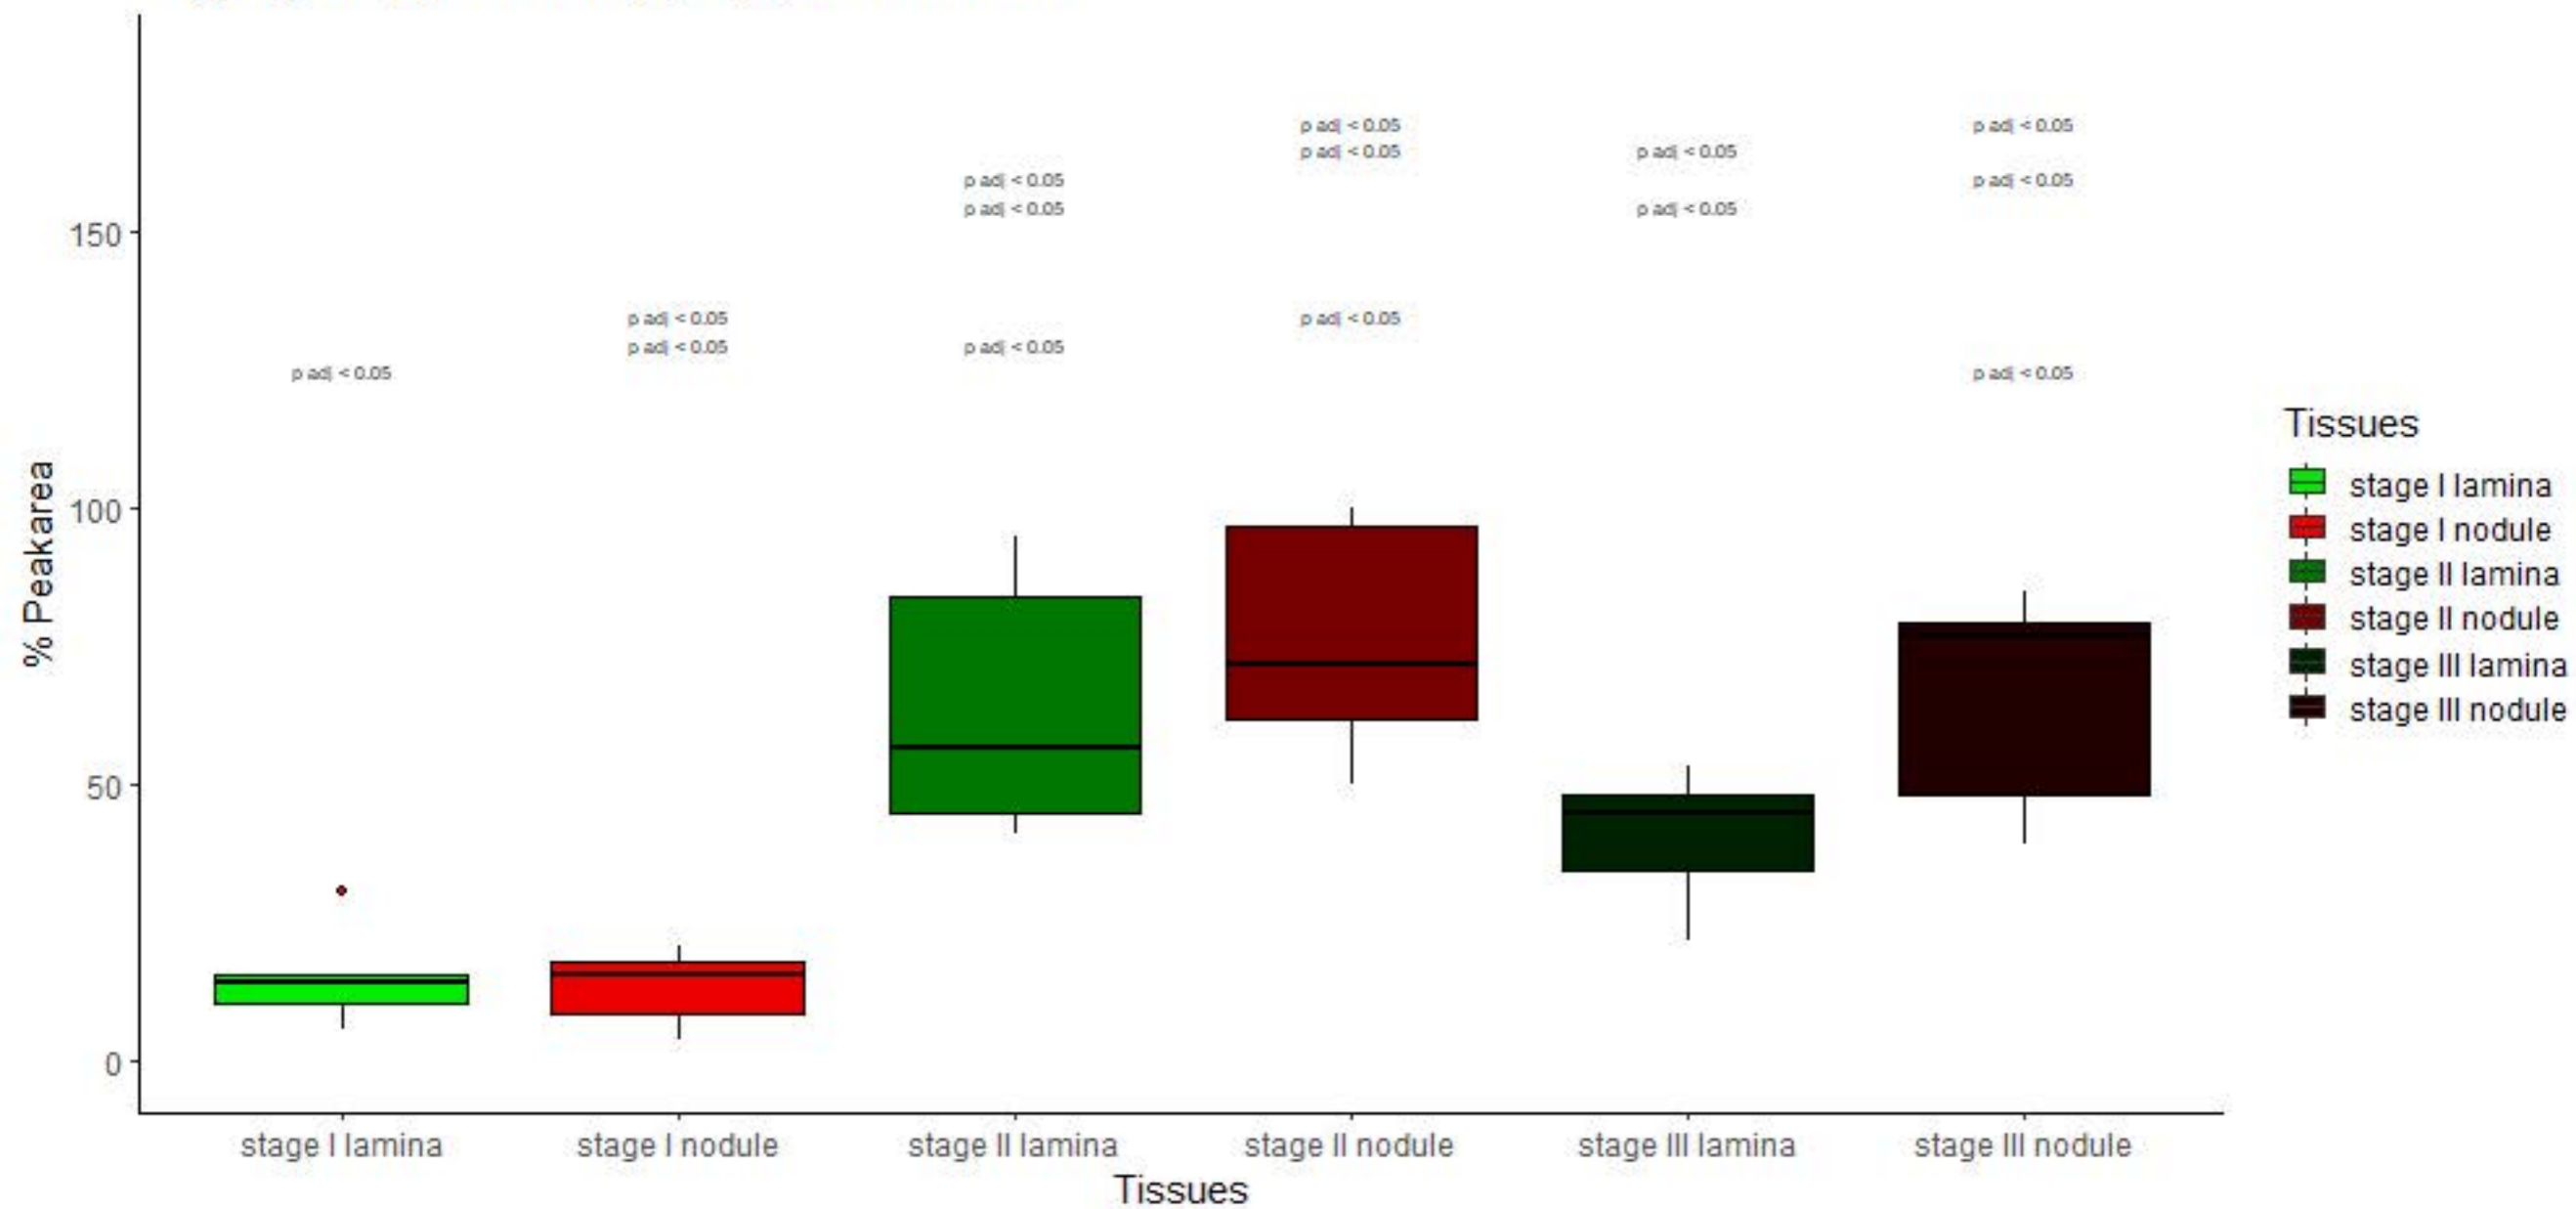

# Pantothenic\_acid\_RT:14.18\_min\_m/z:220.1180

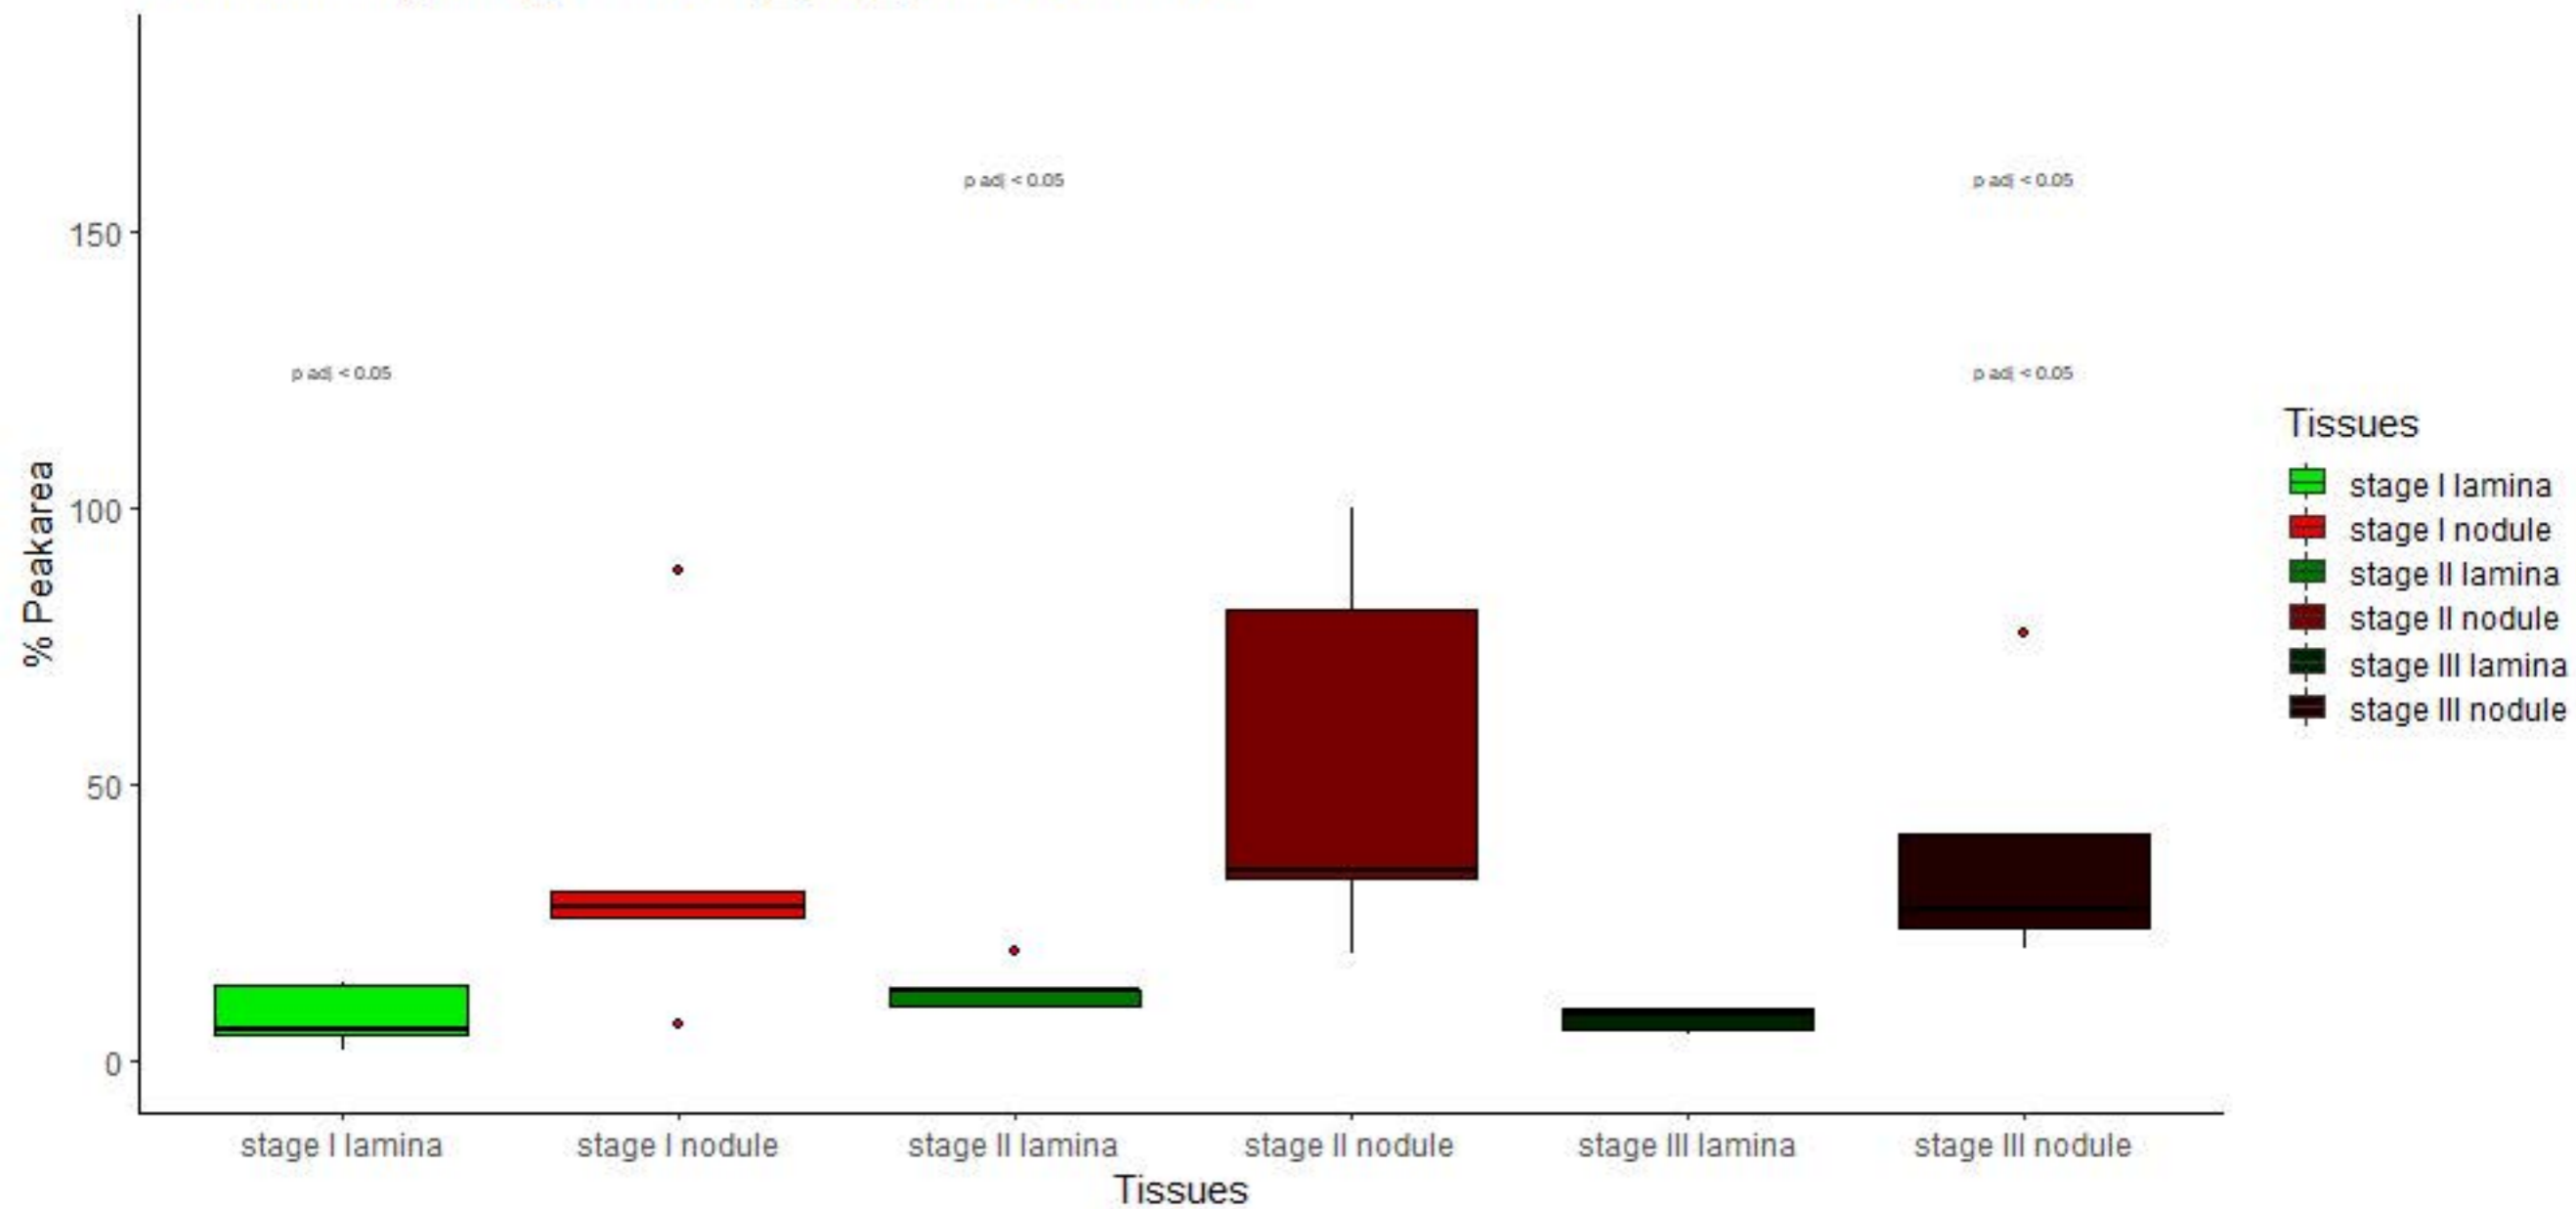

NAD<sup>+</sup>\_RT:4.23\_min\_m/z:664.1164

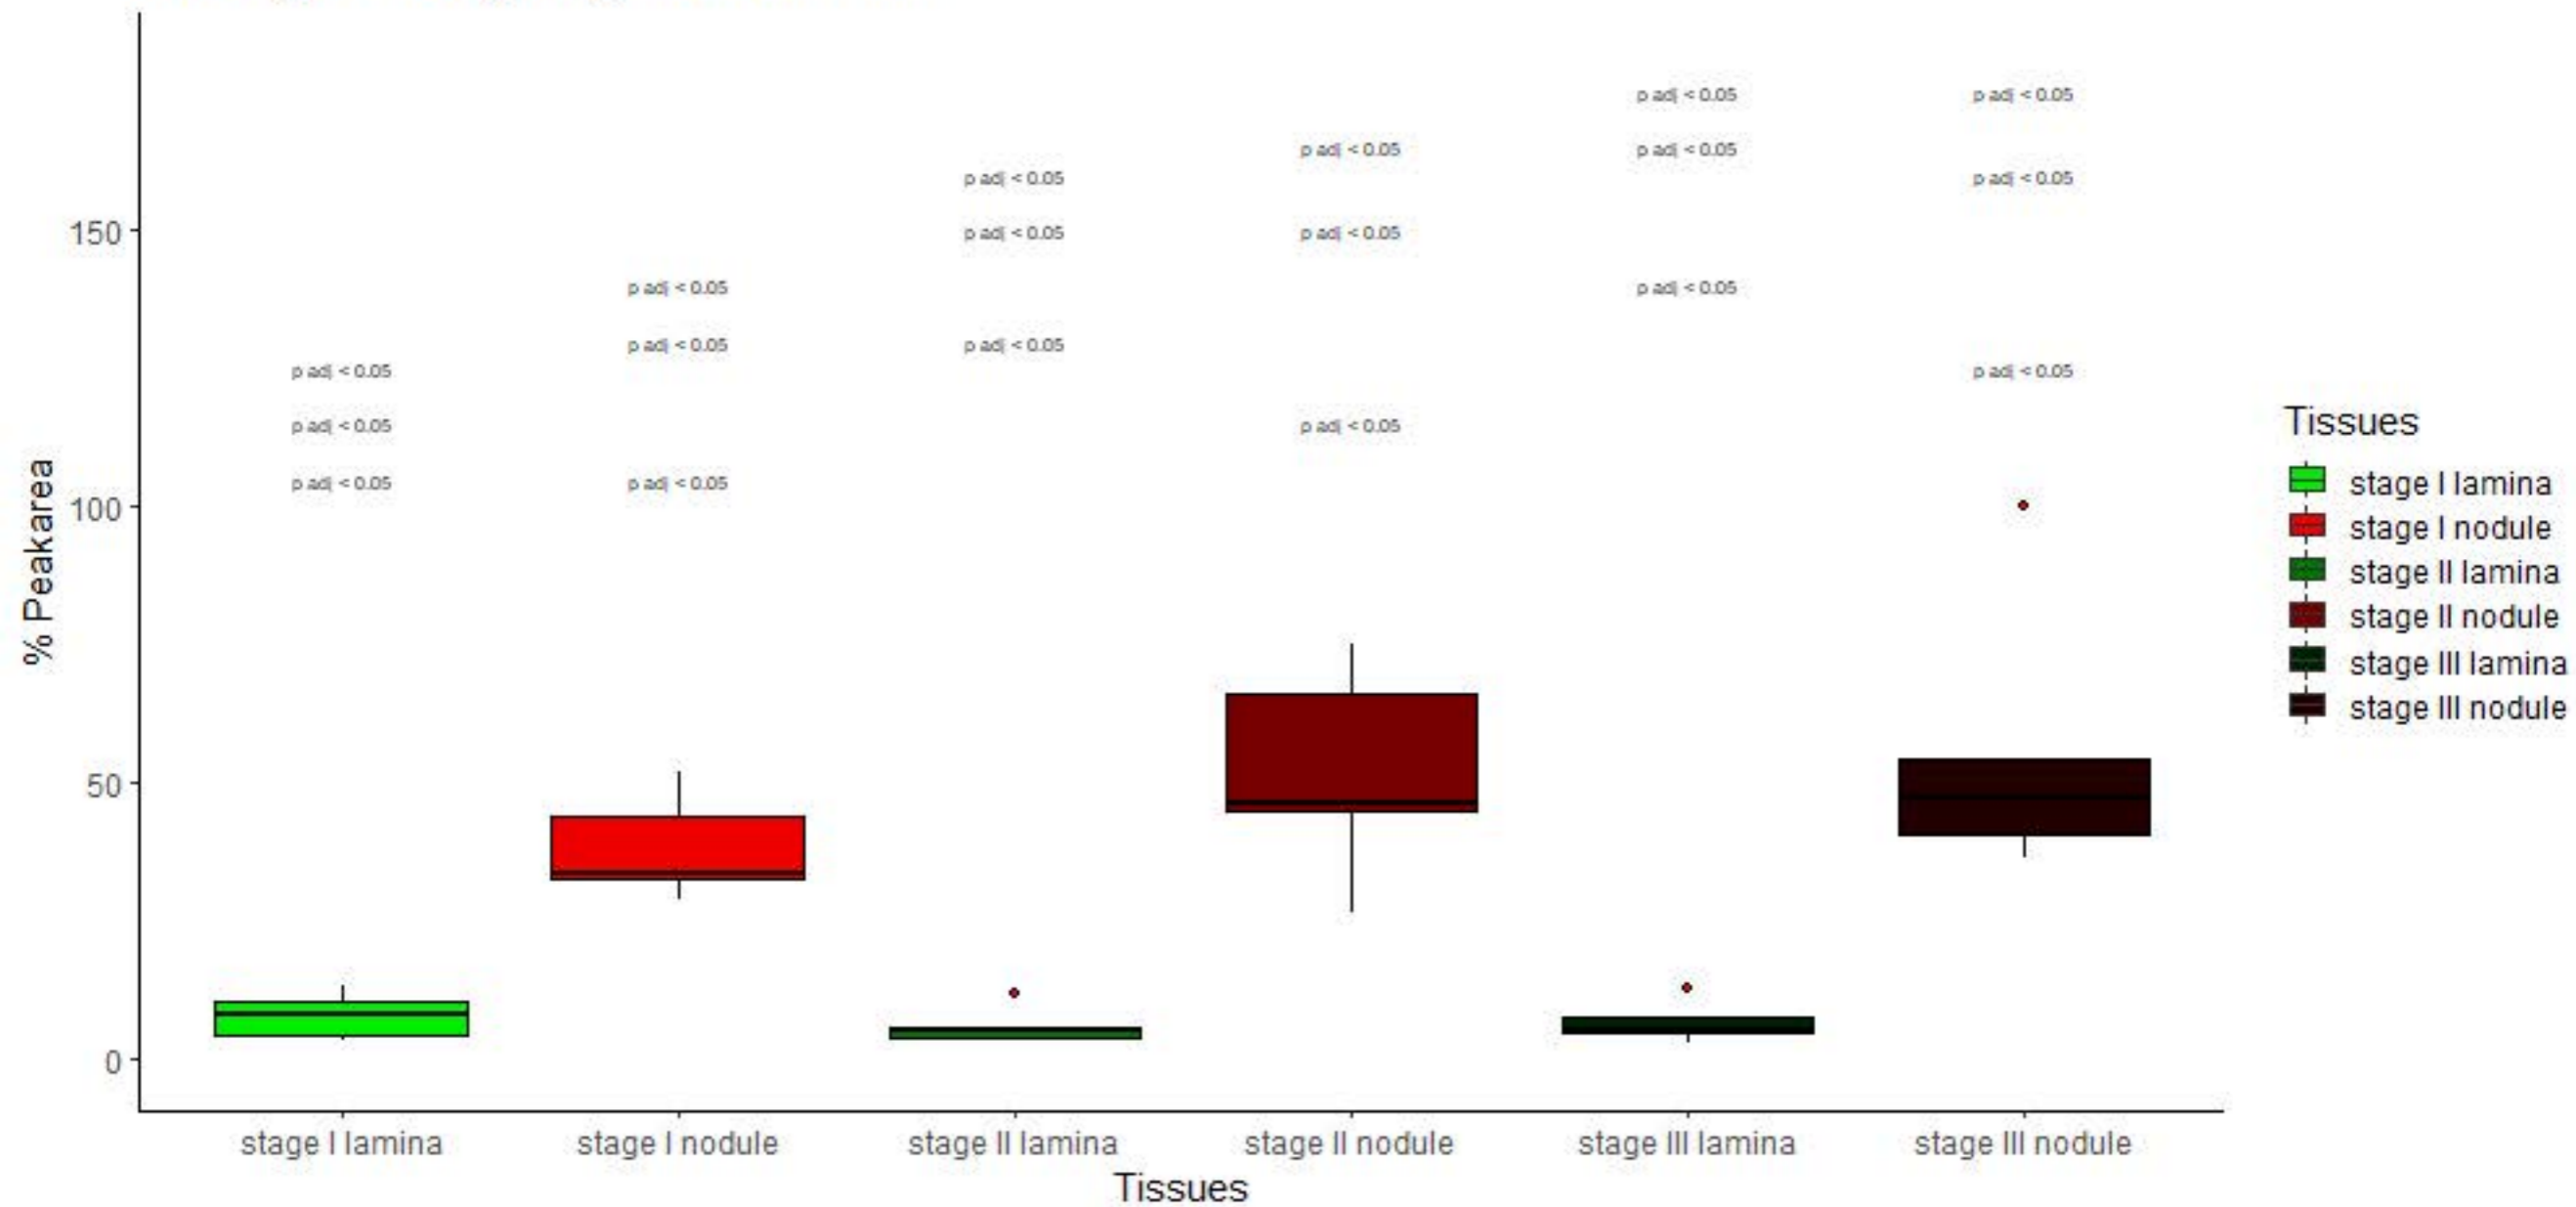

## Nicotinate\_D-ribonucleoside\_RT:2.81\_min\_m/z:256.0816

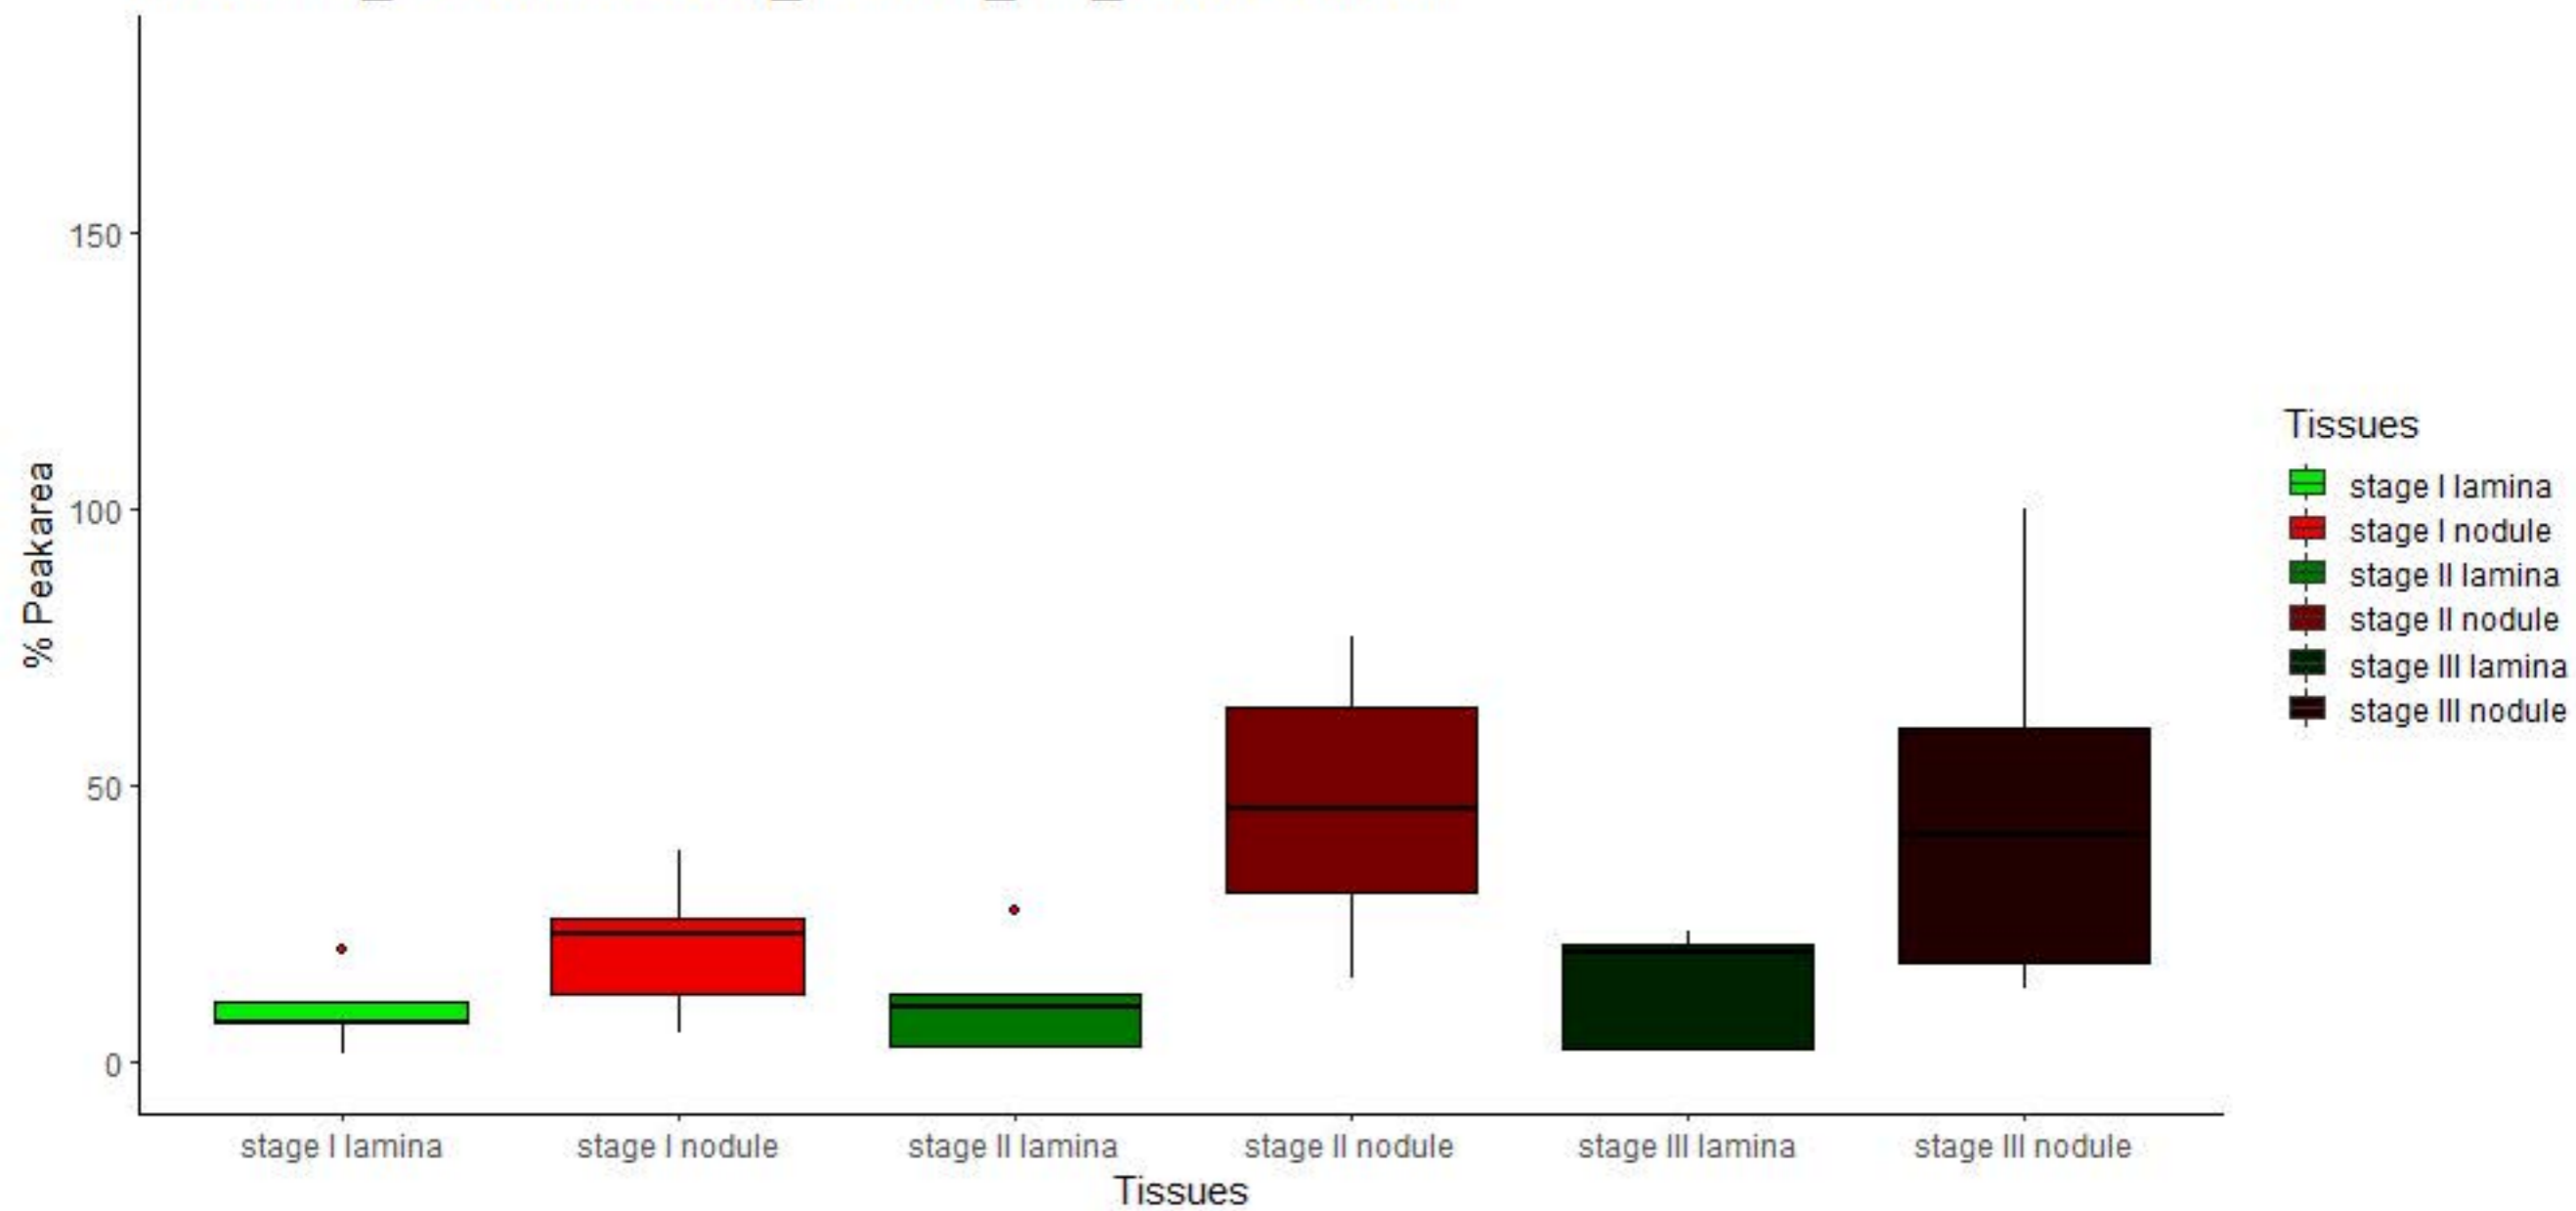

# Riboflavin-5'-phosphate\_RT:17.84\_min\_m/z:457.1119

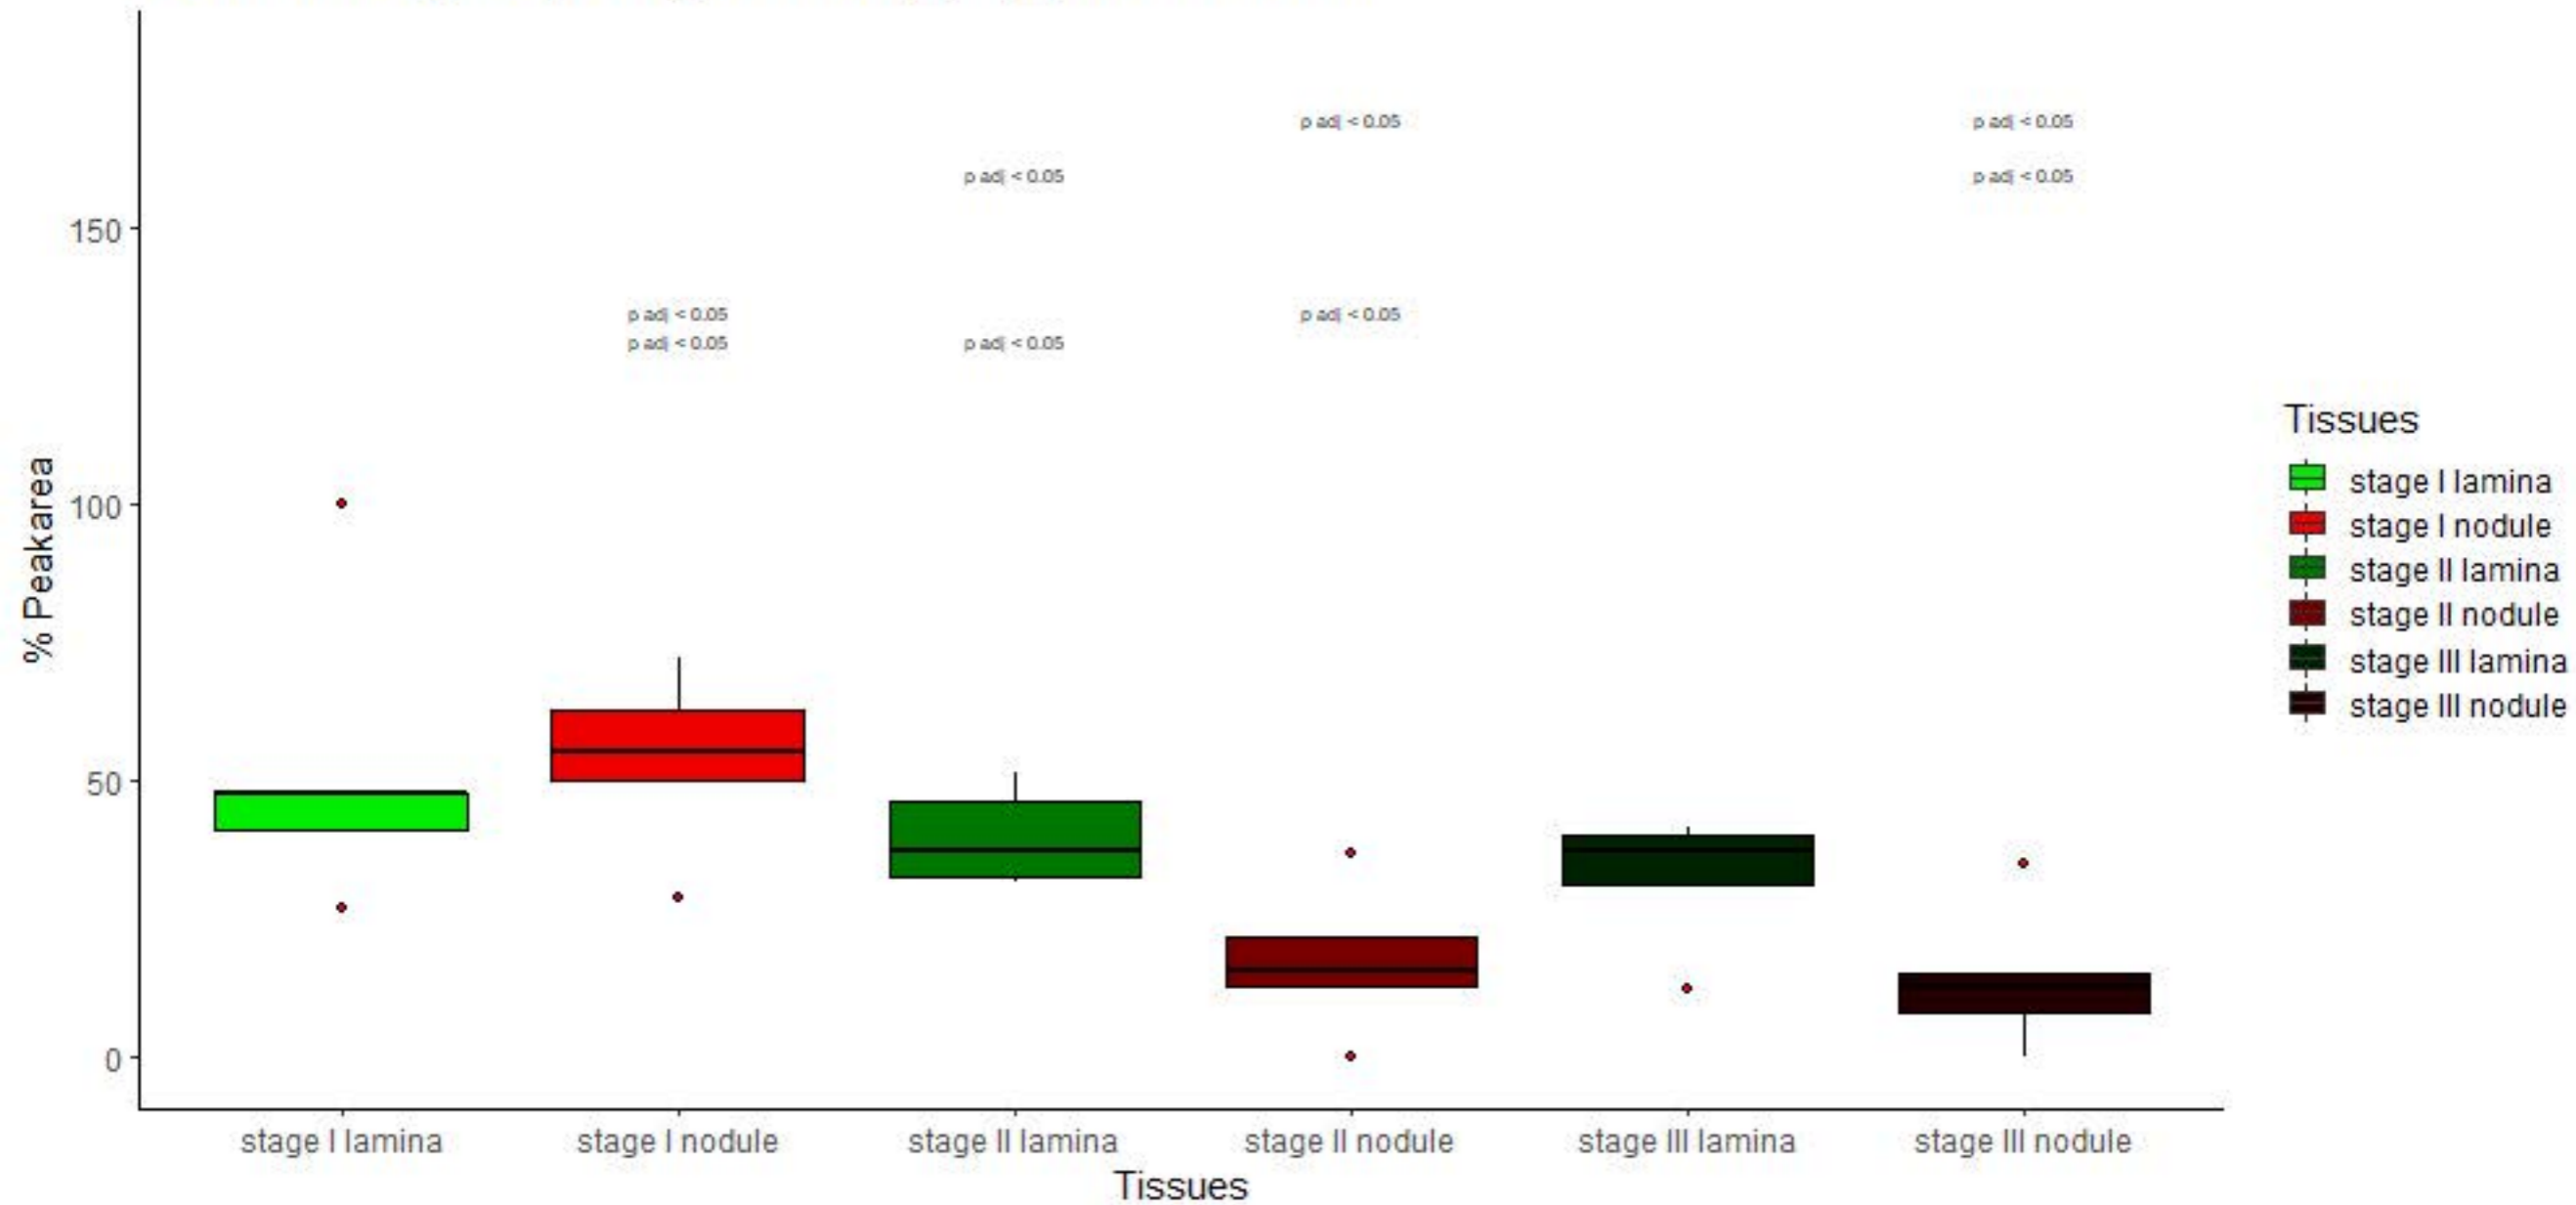

# Leukopterin\_RT:4.48\_min\_m/z:196.0465

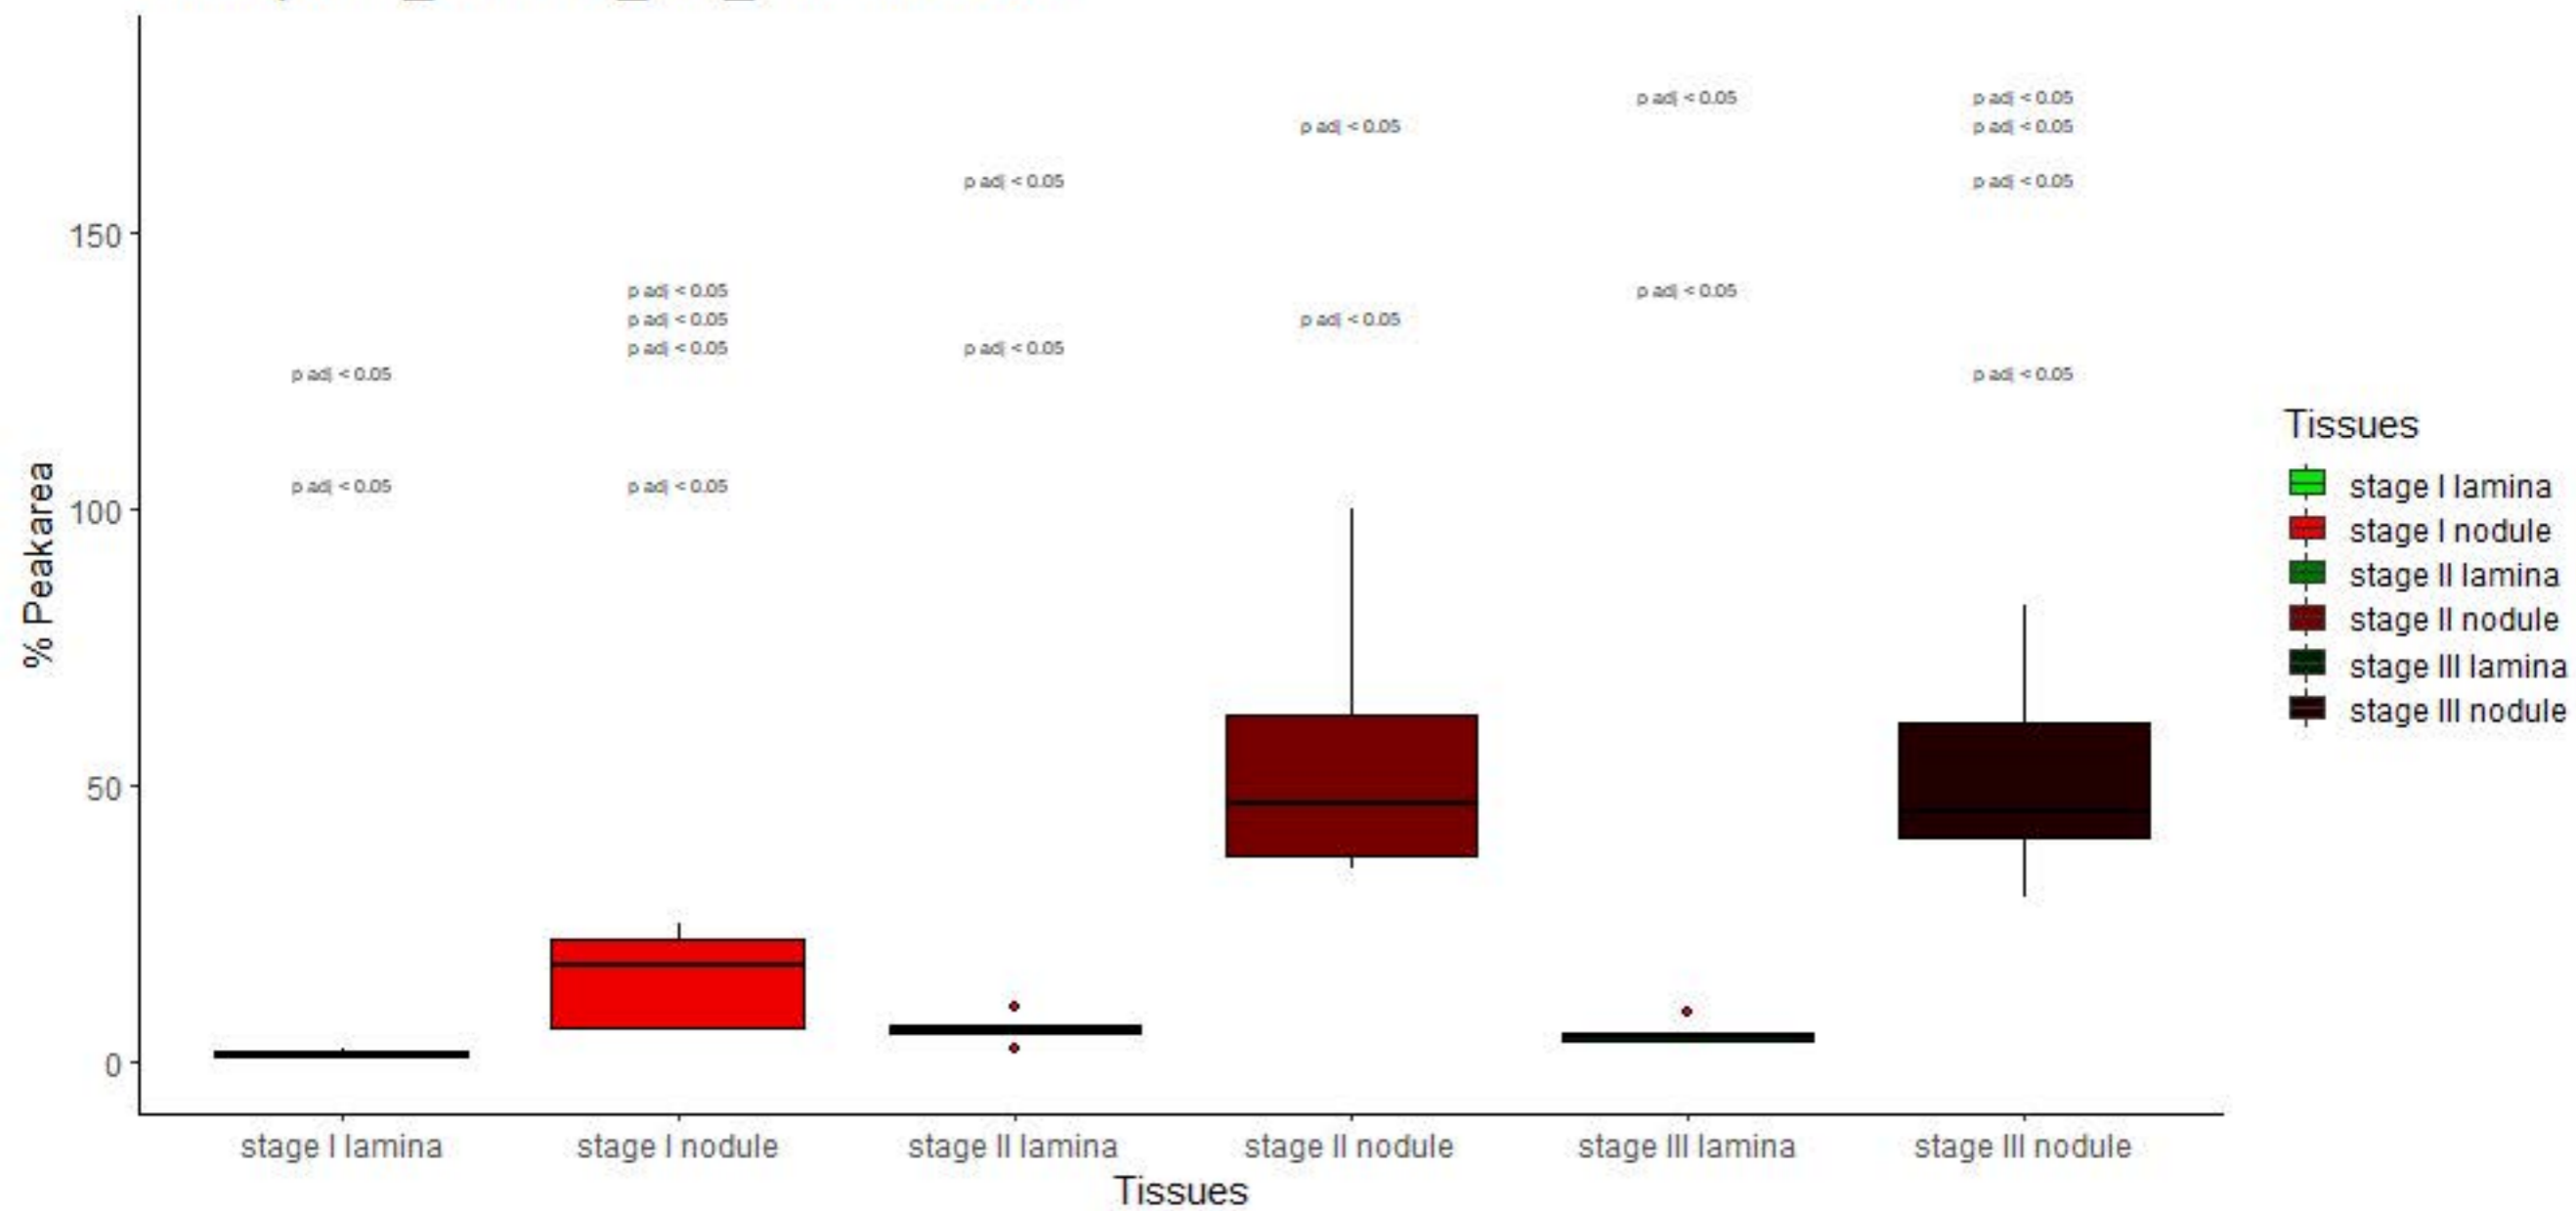



# Adenosine\_RT:8.09\_min\_m/z:268.1040

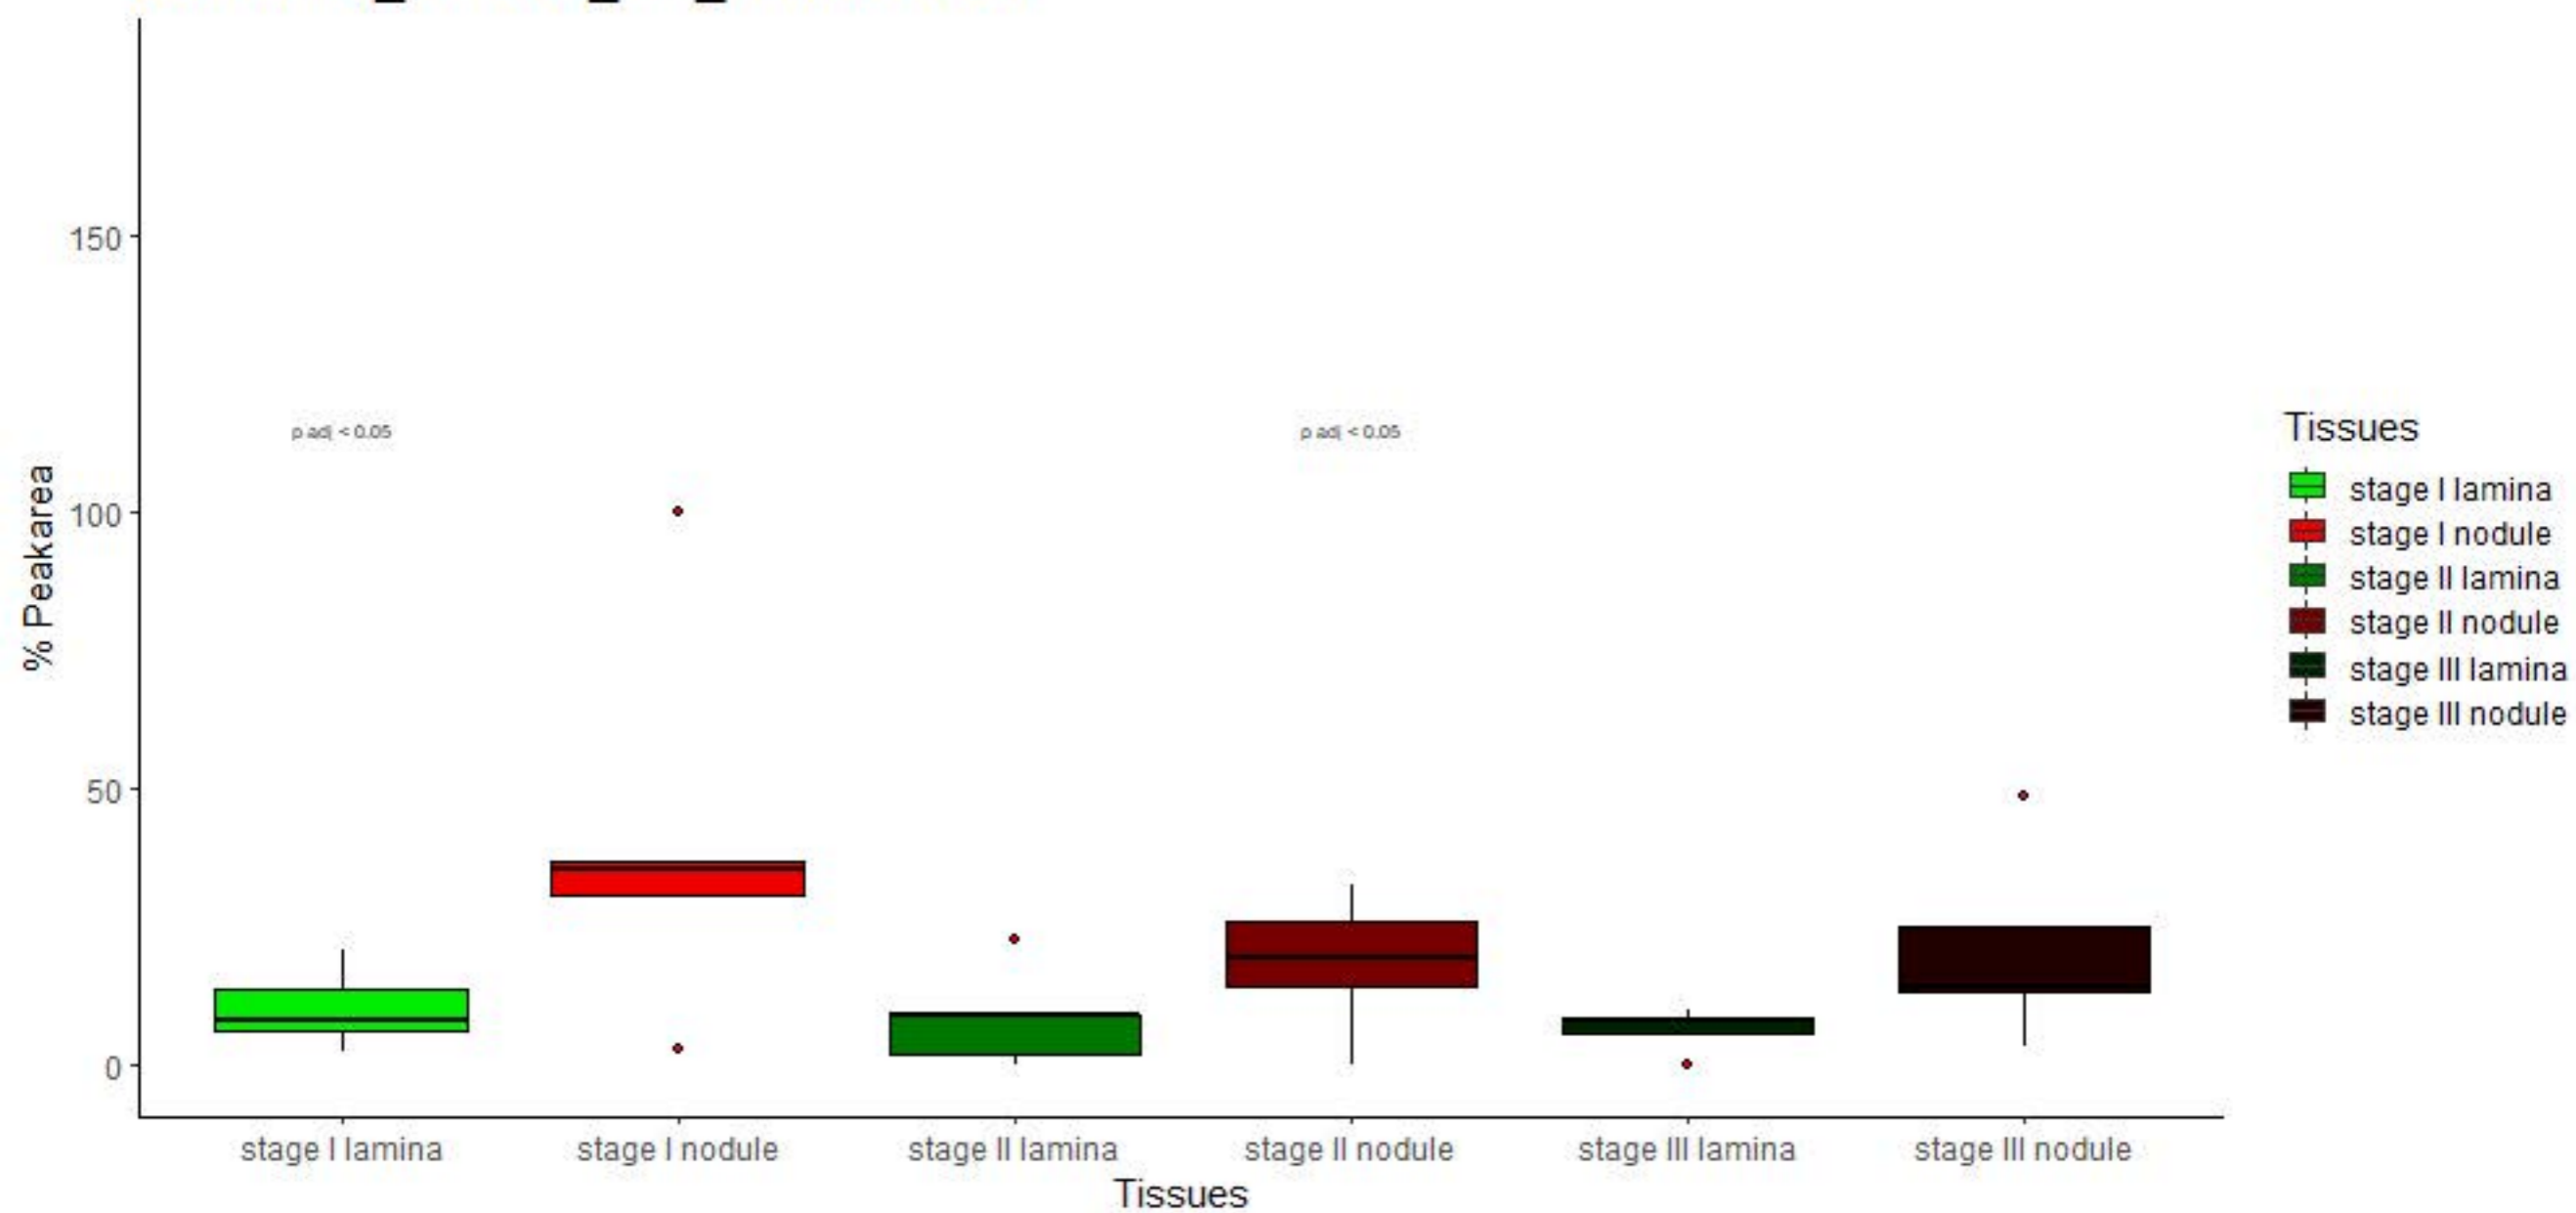

## Adenosine\_monophosphate\_RT:3.30\_min\_m/z:348.0704

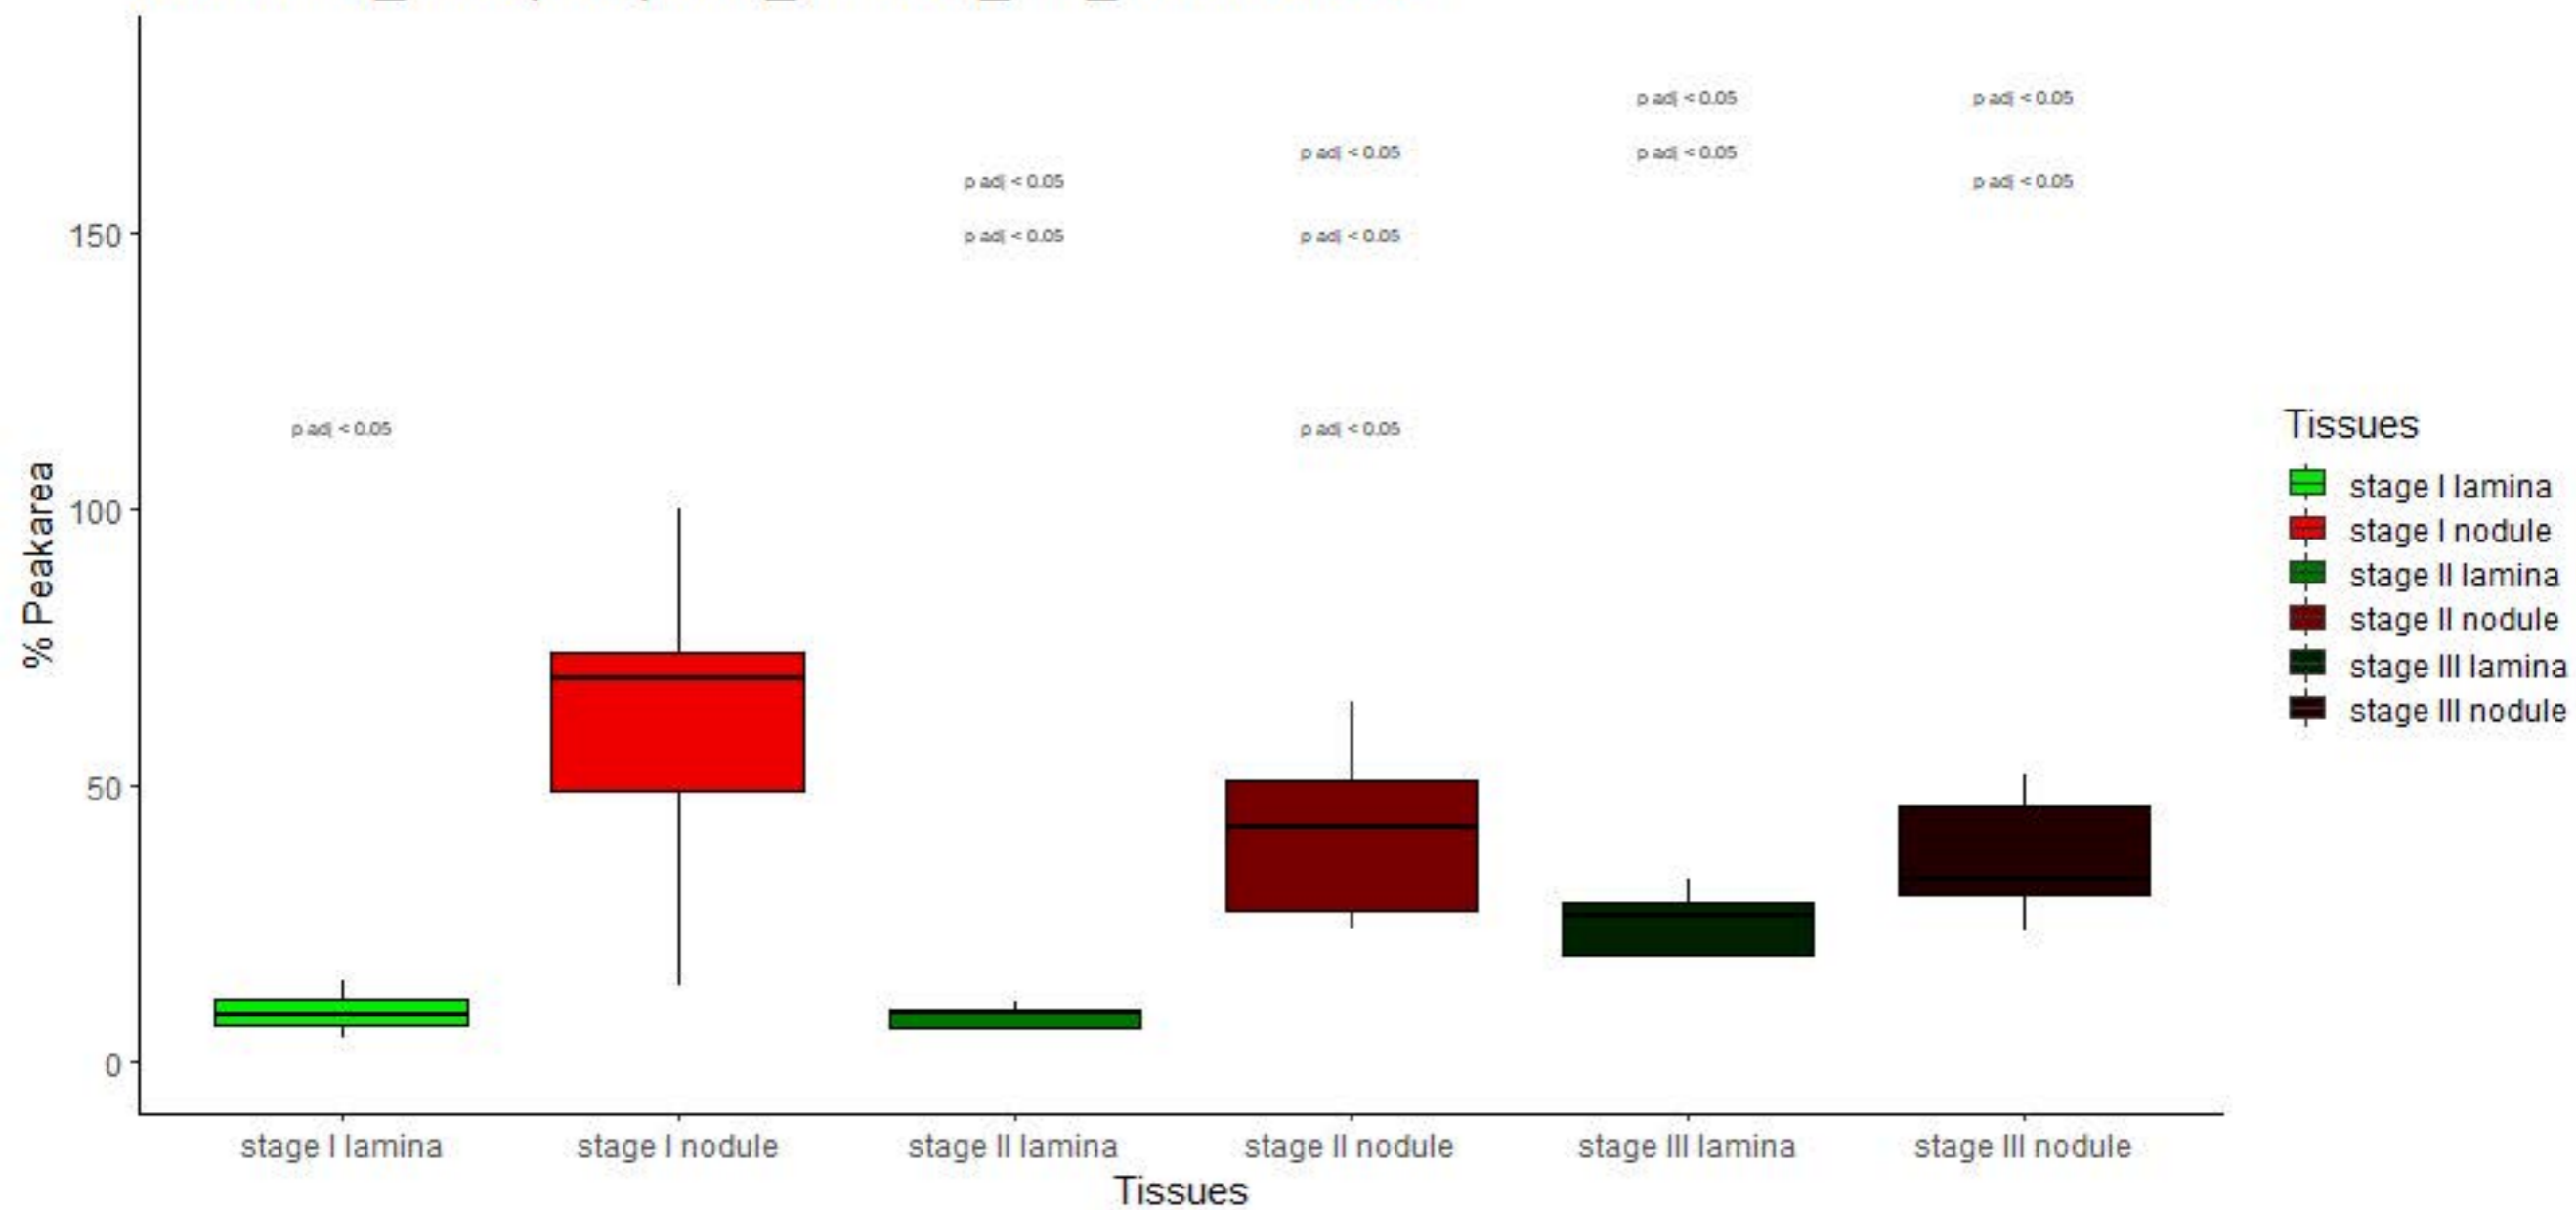

# Guanosine\_RT:9.92\_min\_m/z:284.0989

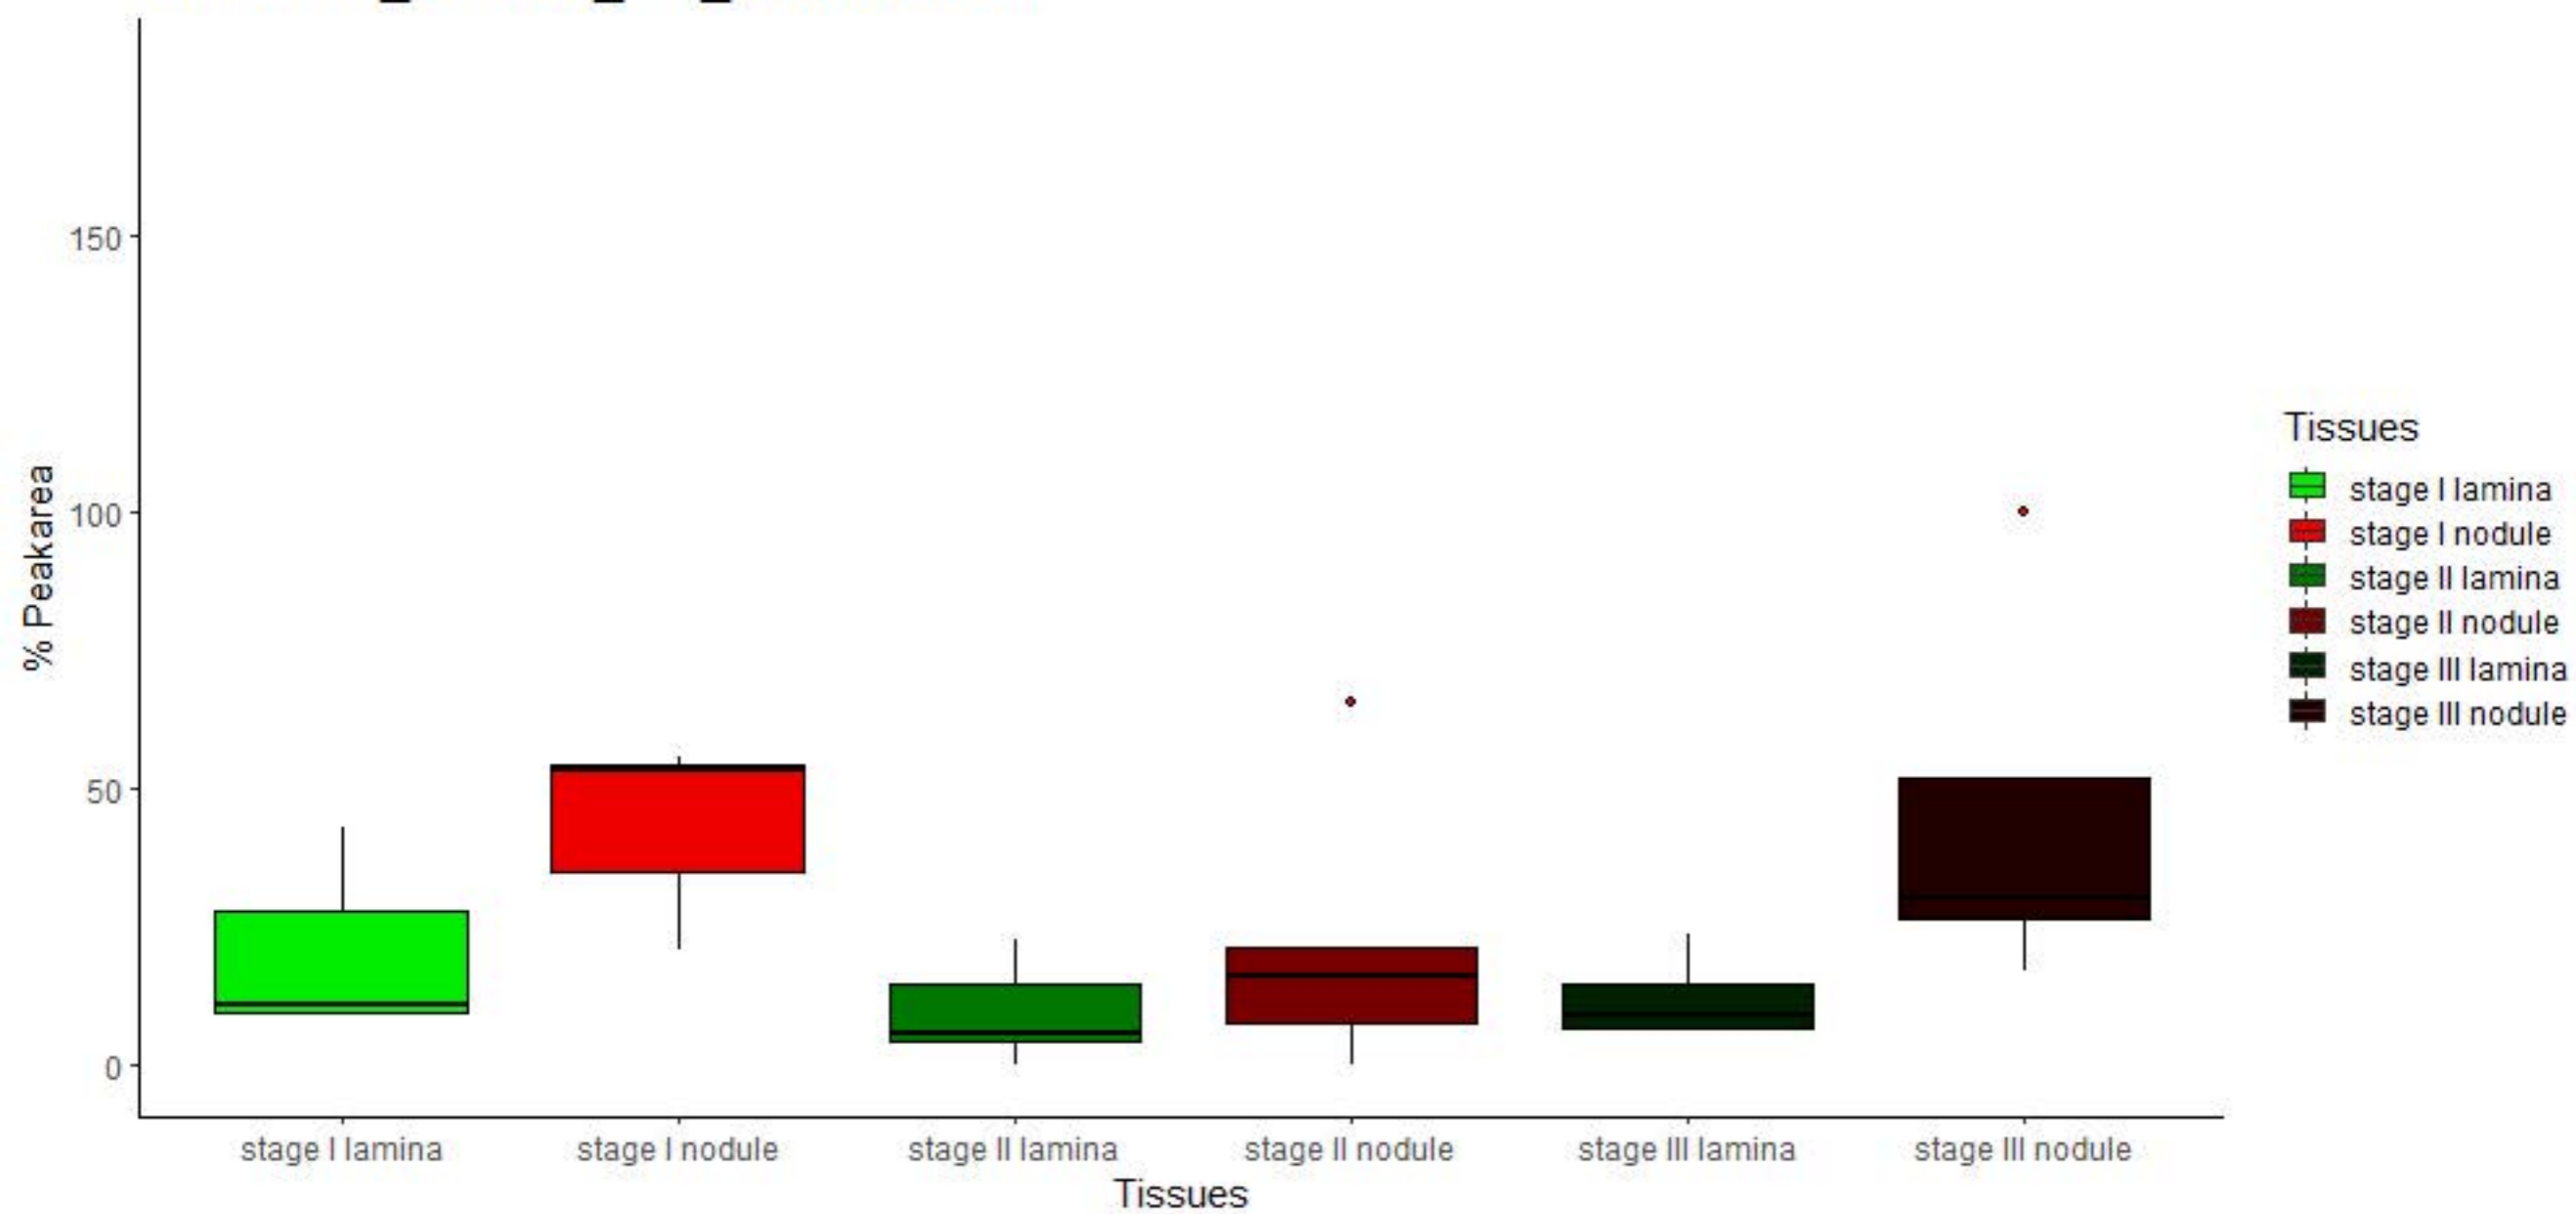

# Guanosine\_monophosphate\_RT:3.43\_min\_m/z:364.0653

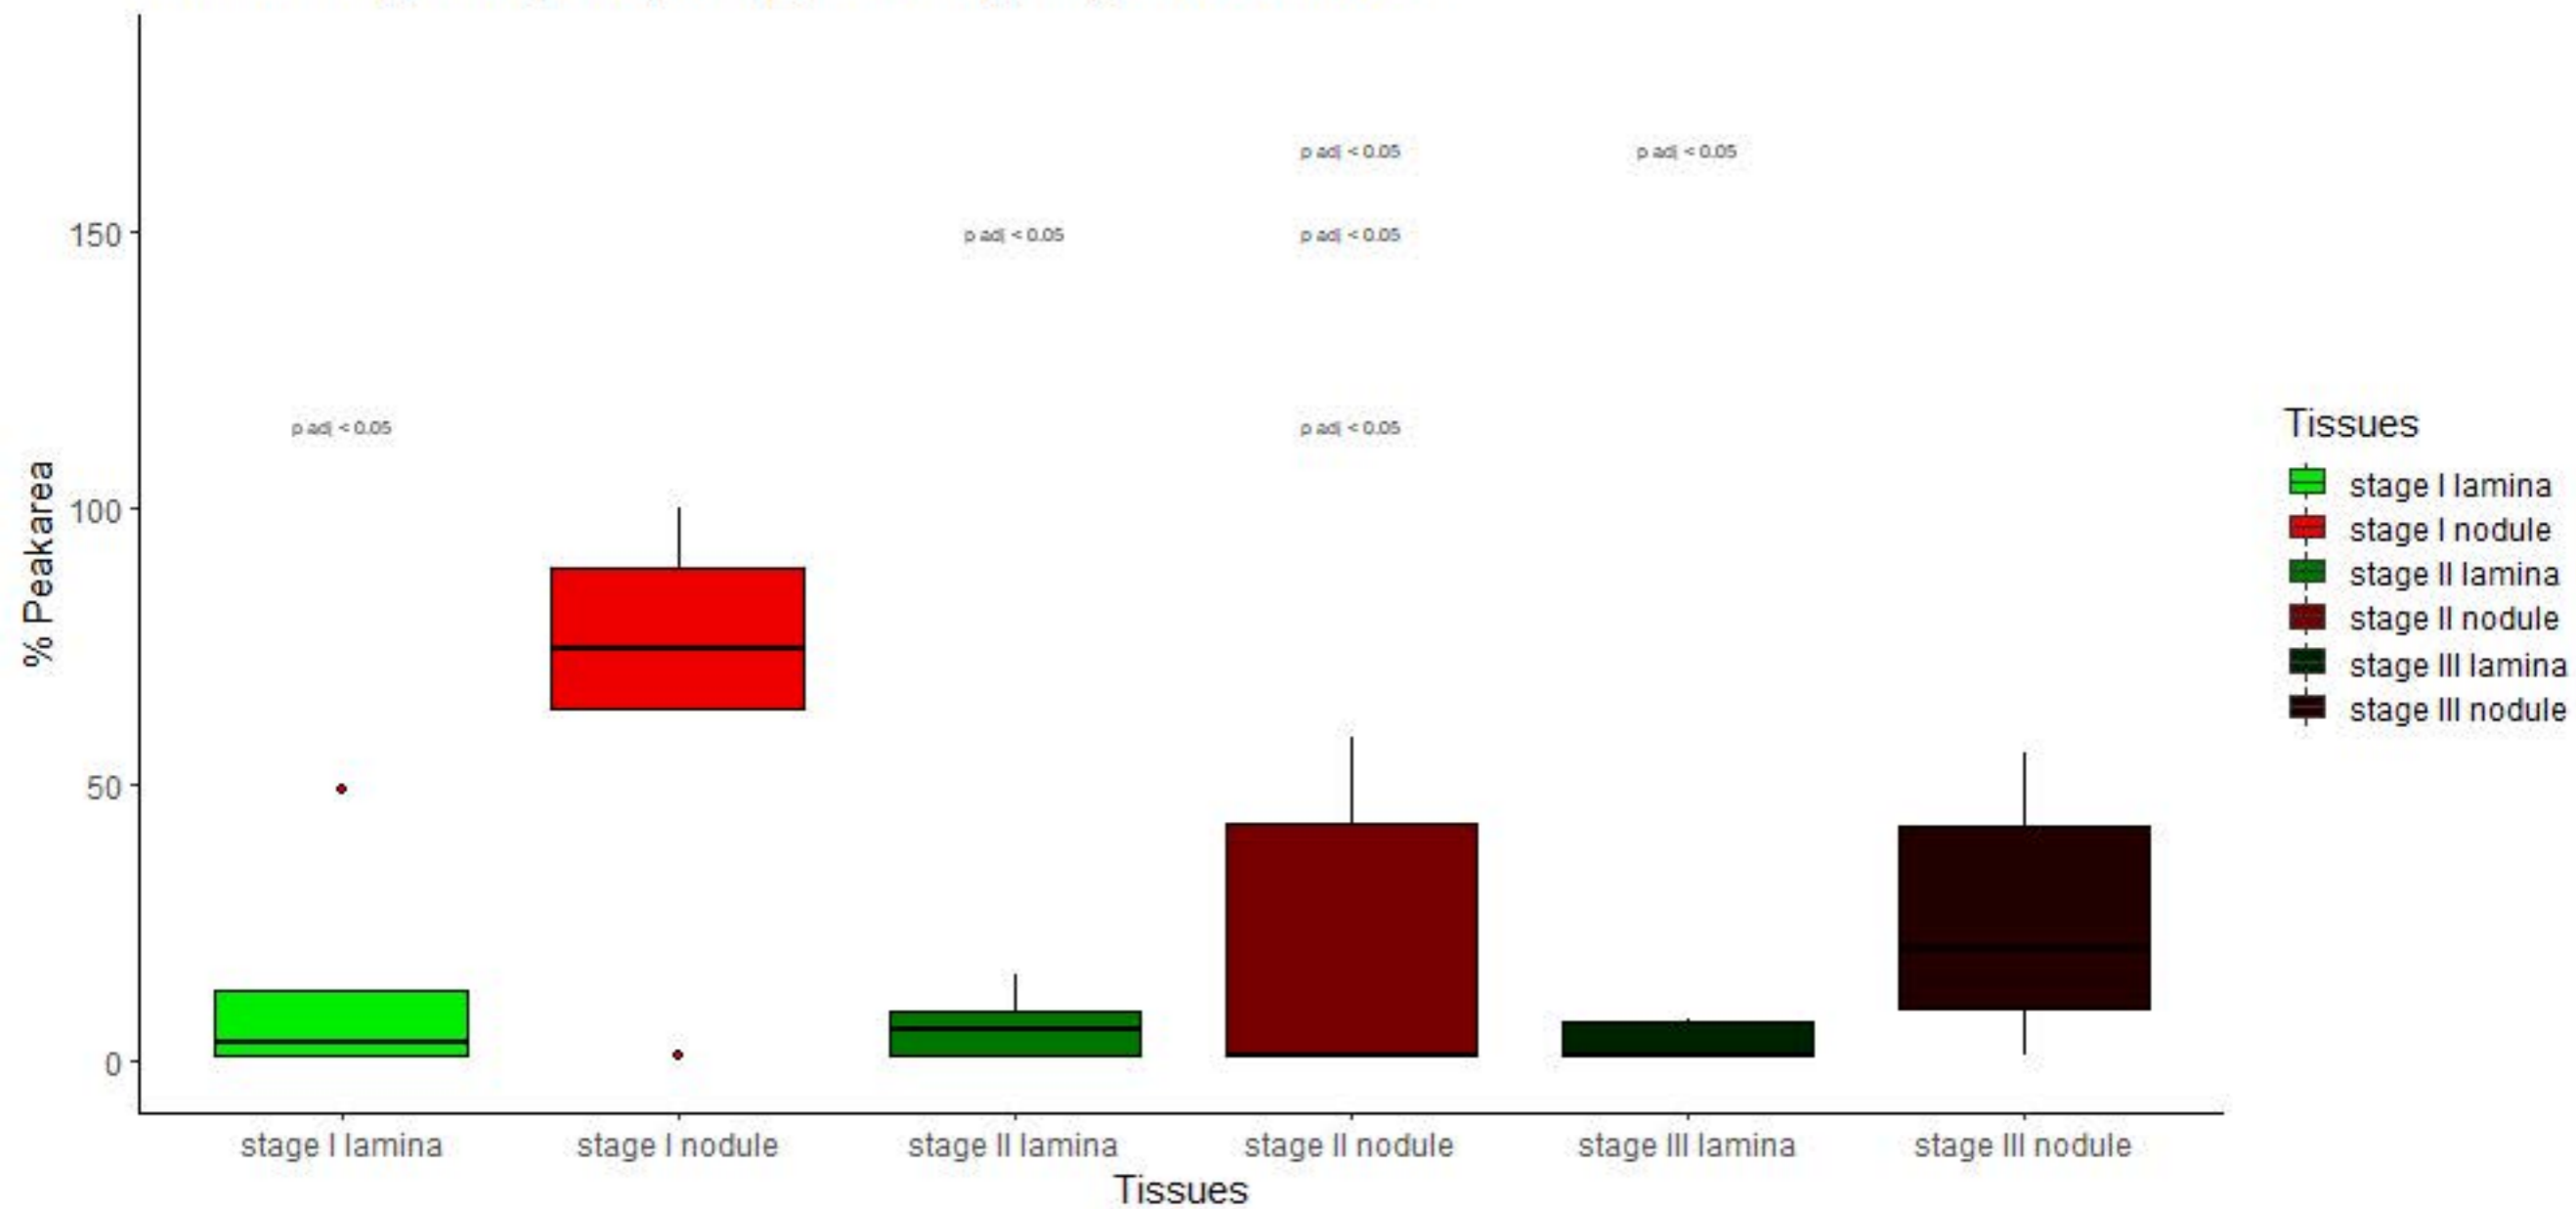

# Cyclic\_ADP\_Ribose\_RT:4.23\_min\_m/z:542.0680

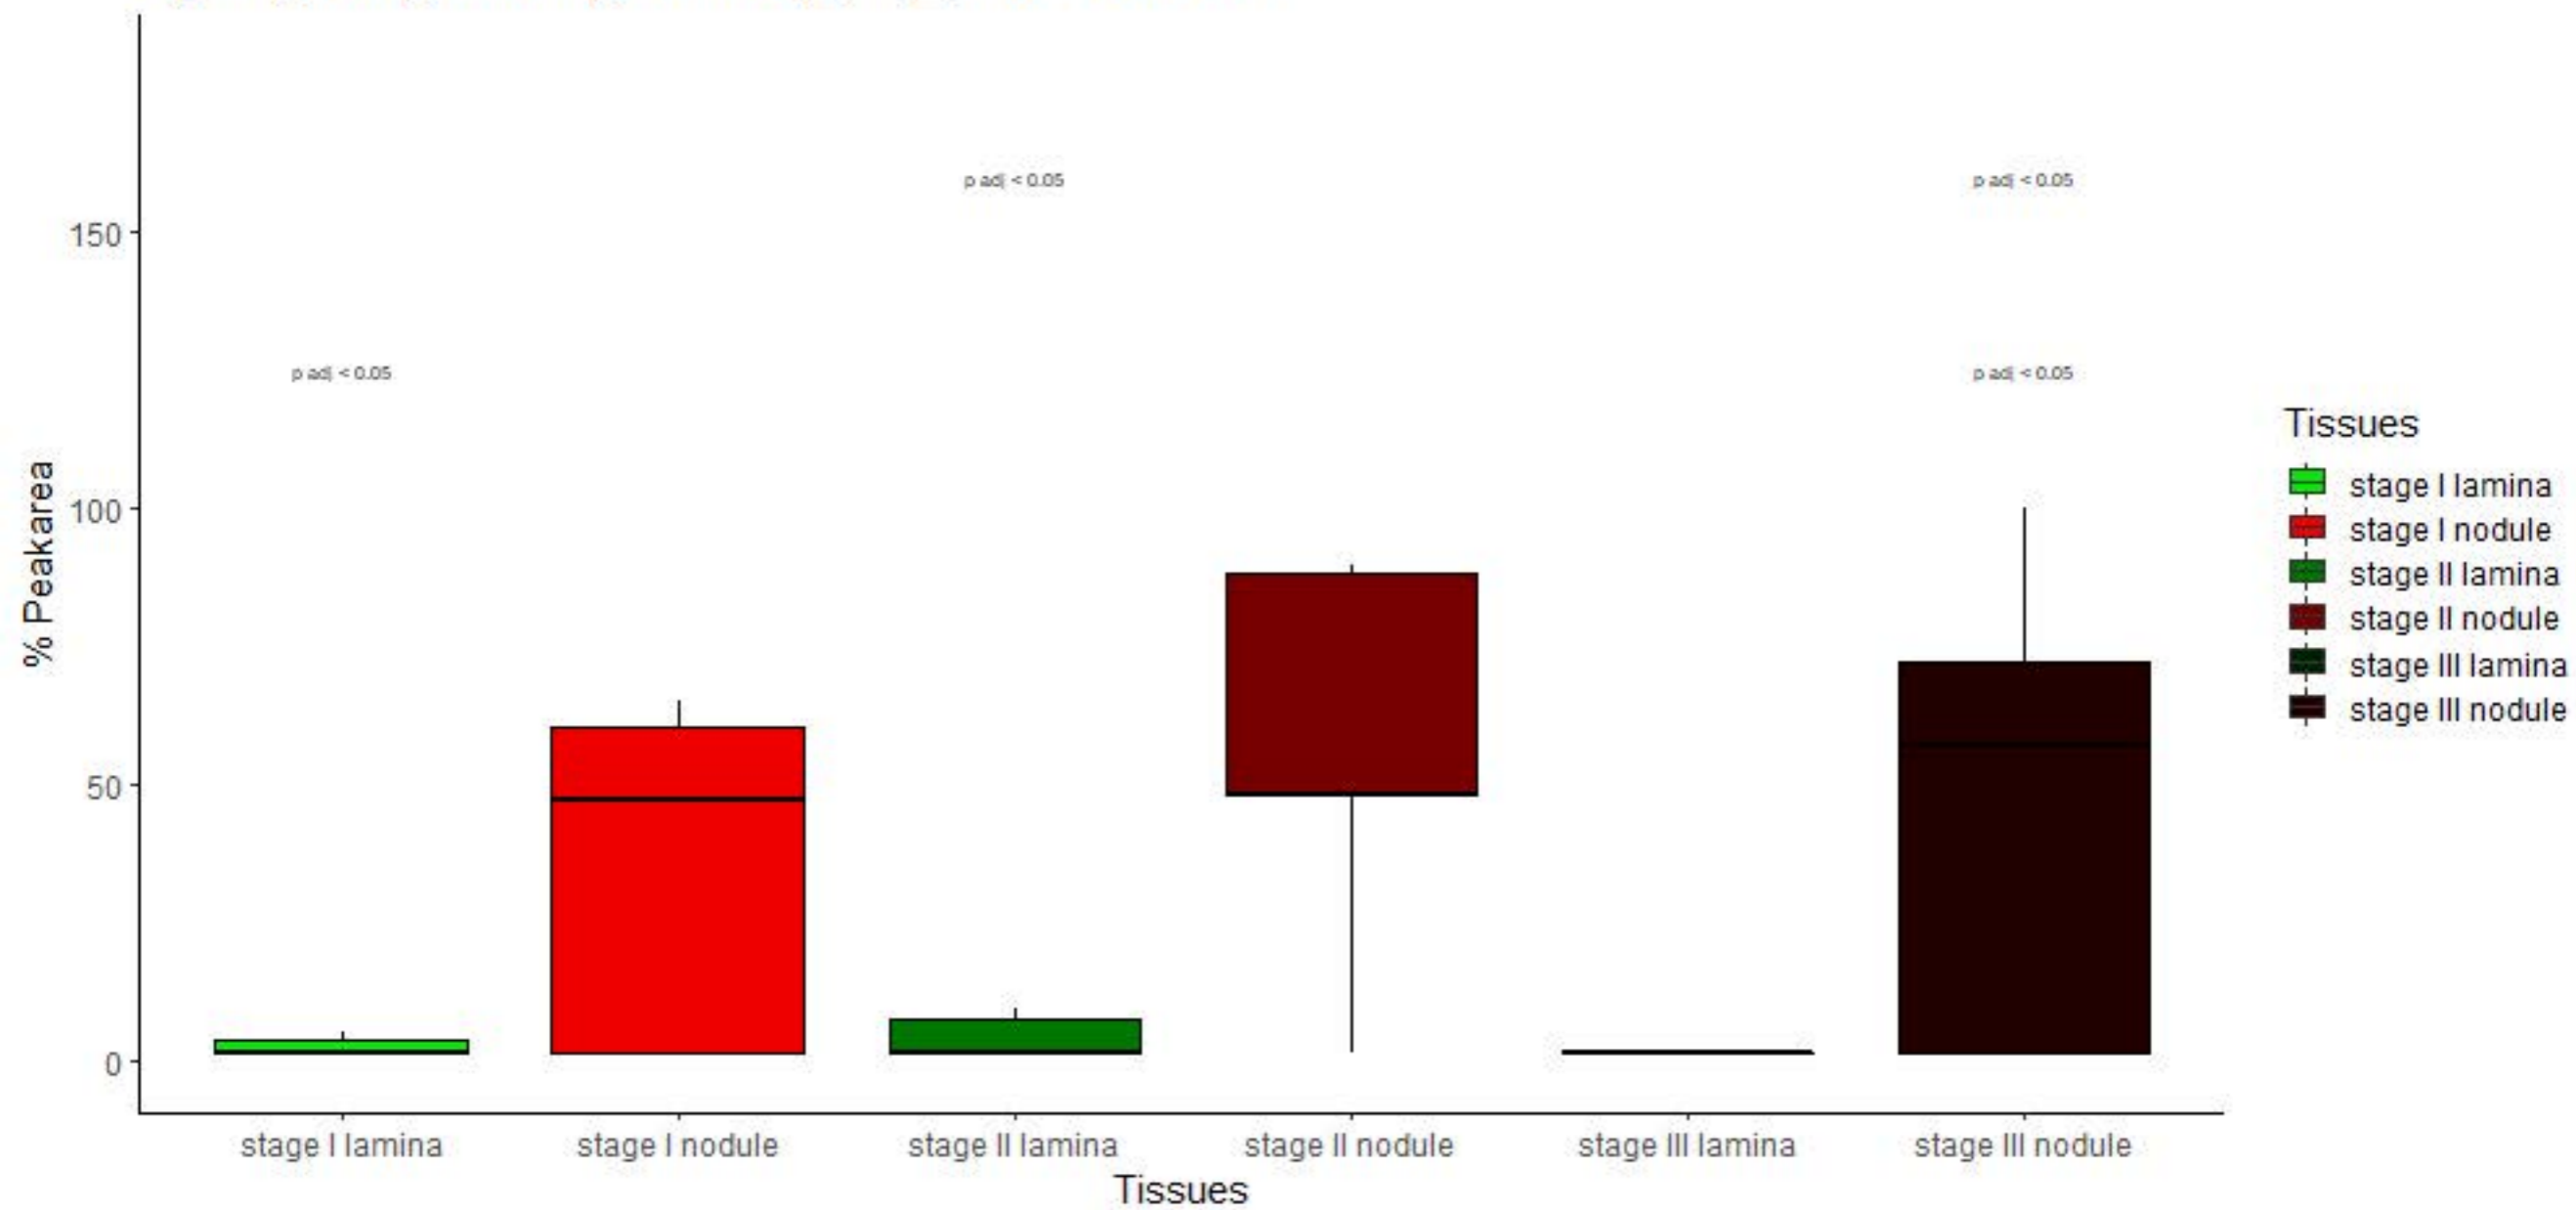



## Putative\_aminosugar\_RT:14.47\_min\_m/z:851.3517

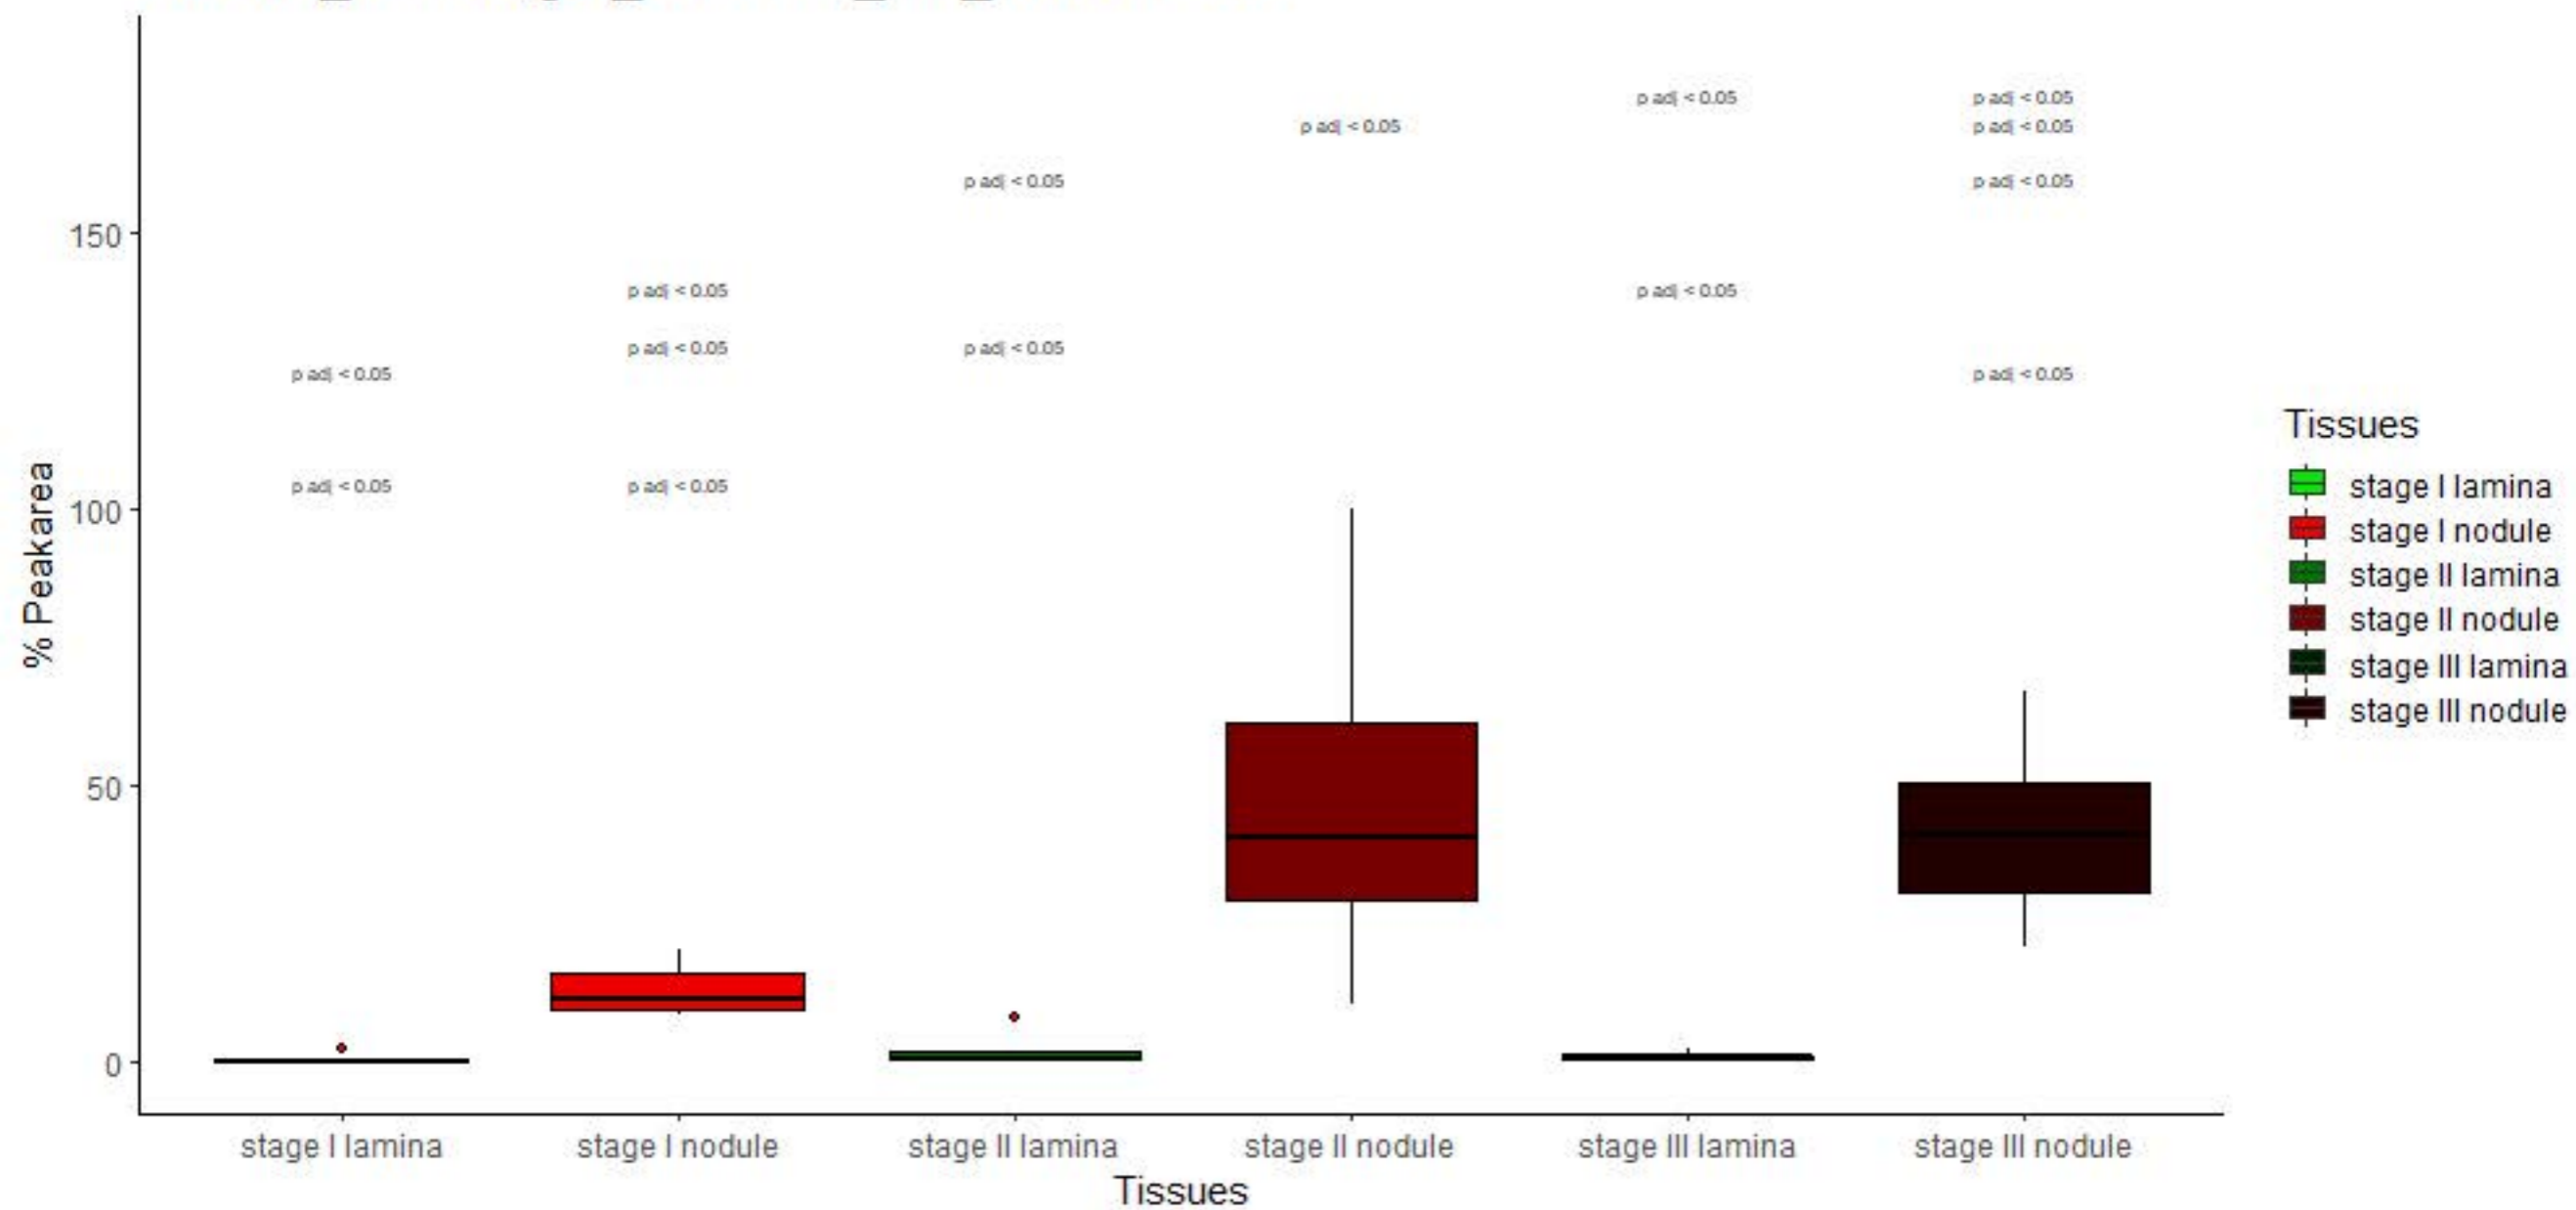

# Putative\_aminosugar\_RT:15.31\_min\_m/z:719.3095

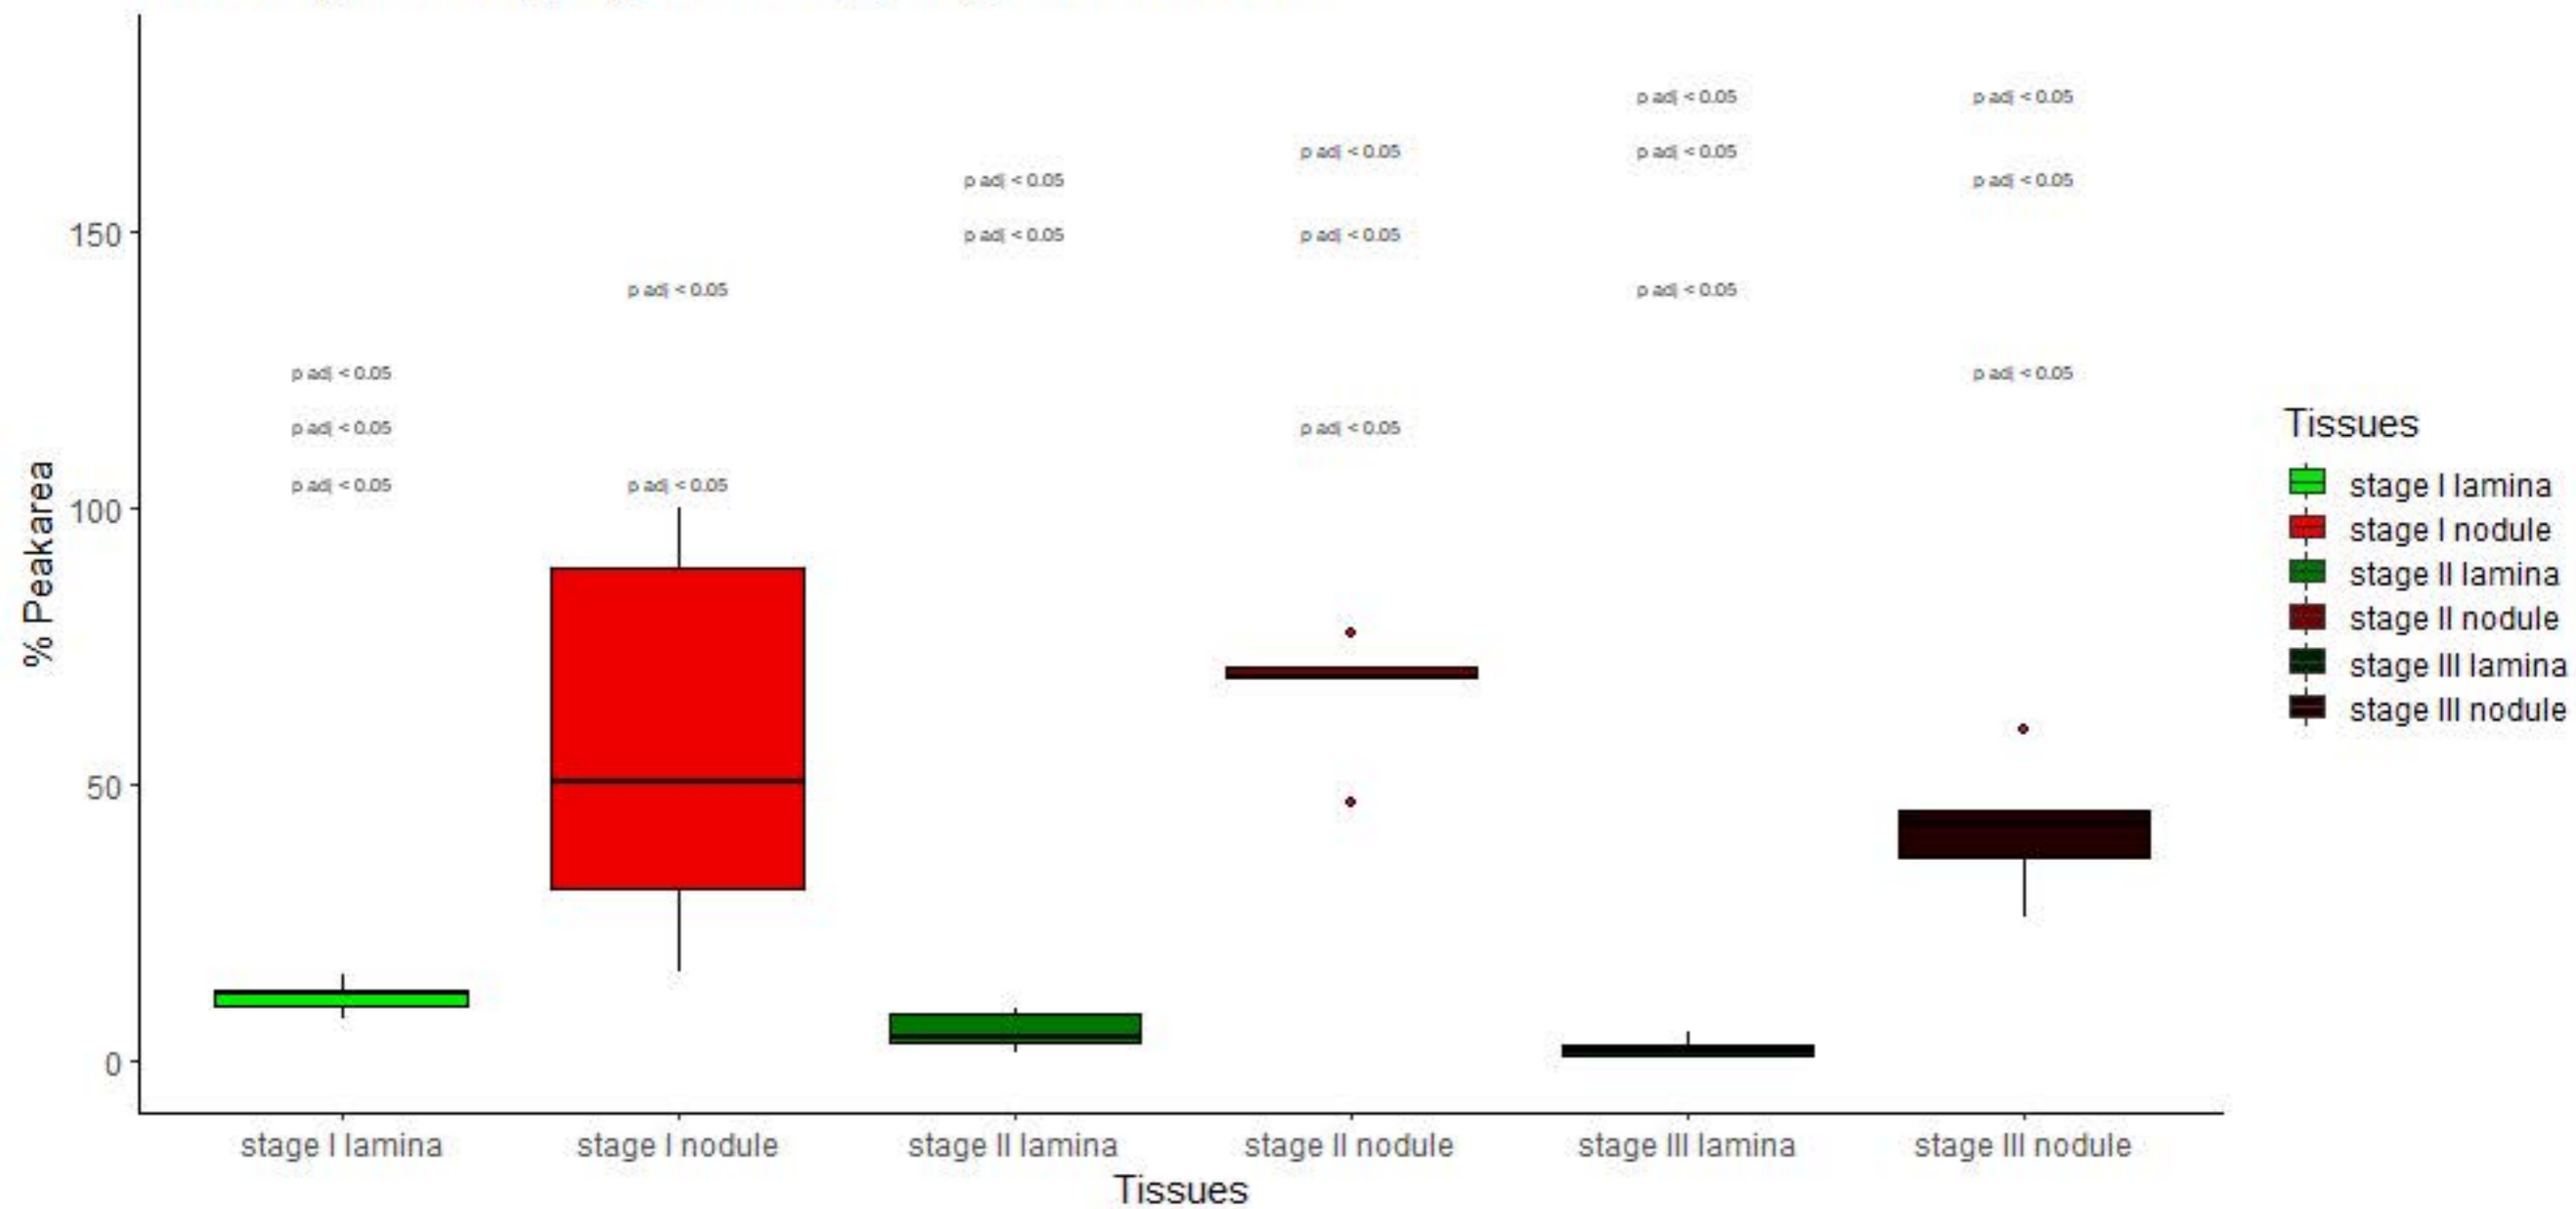



# Putative\_aminosugar\_RT:15.31\_min\_m/z:922.3883

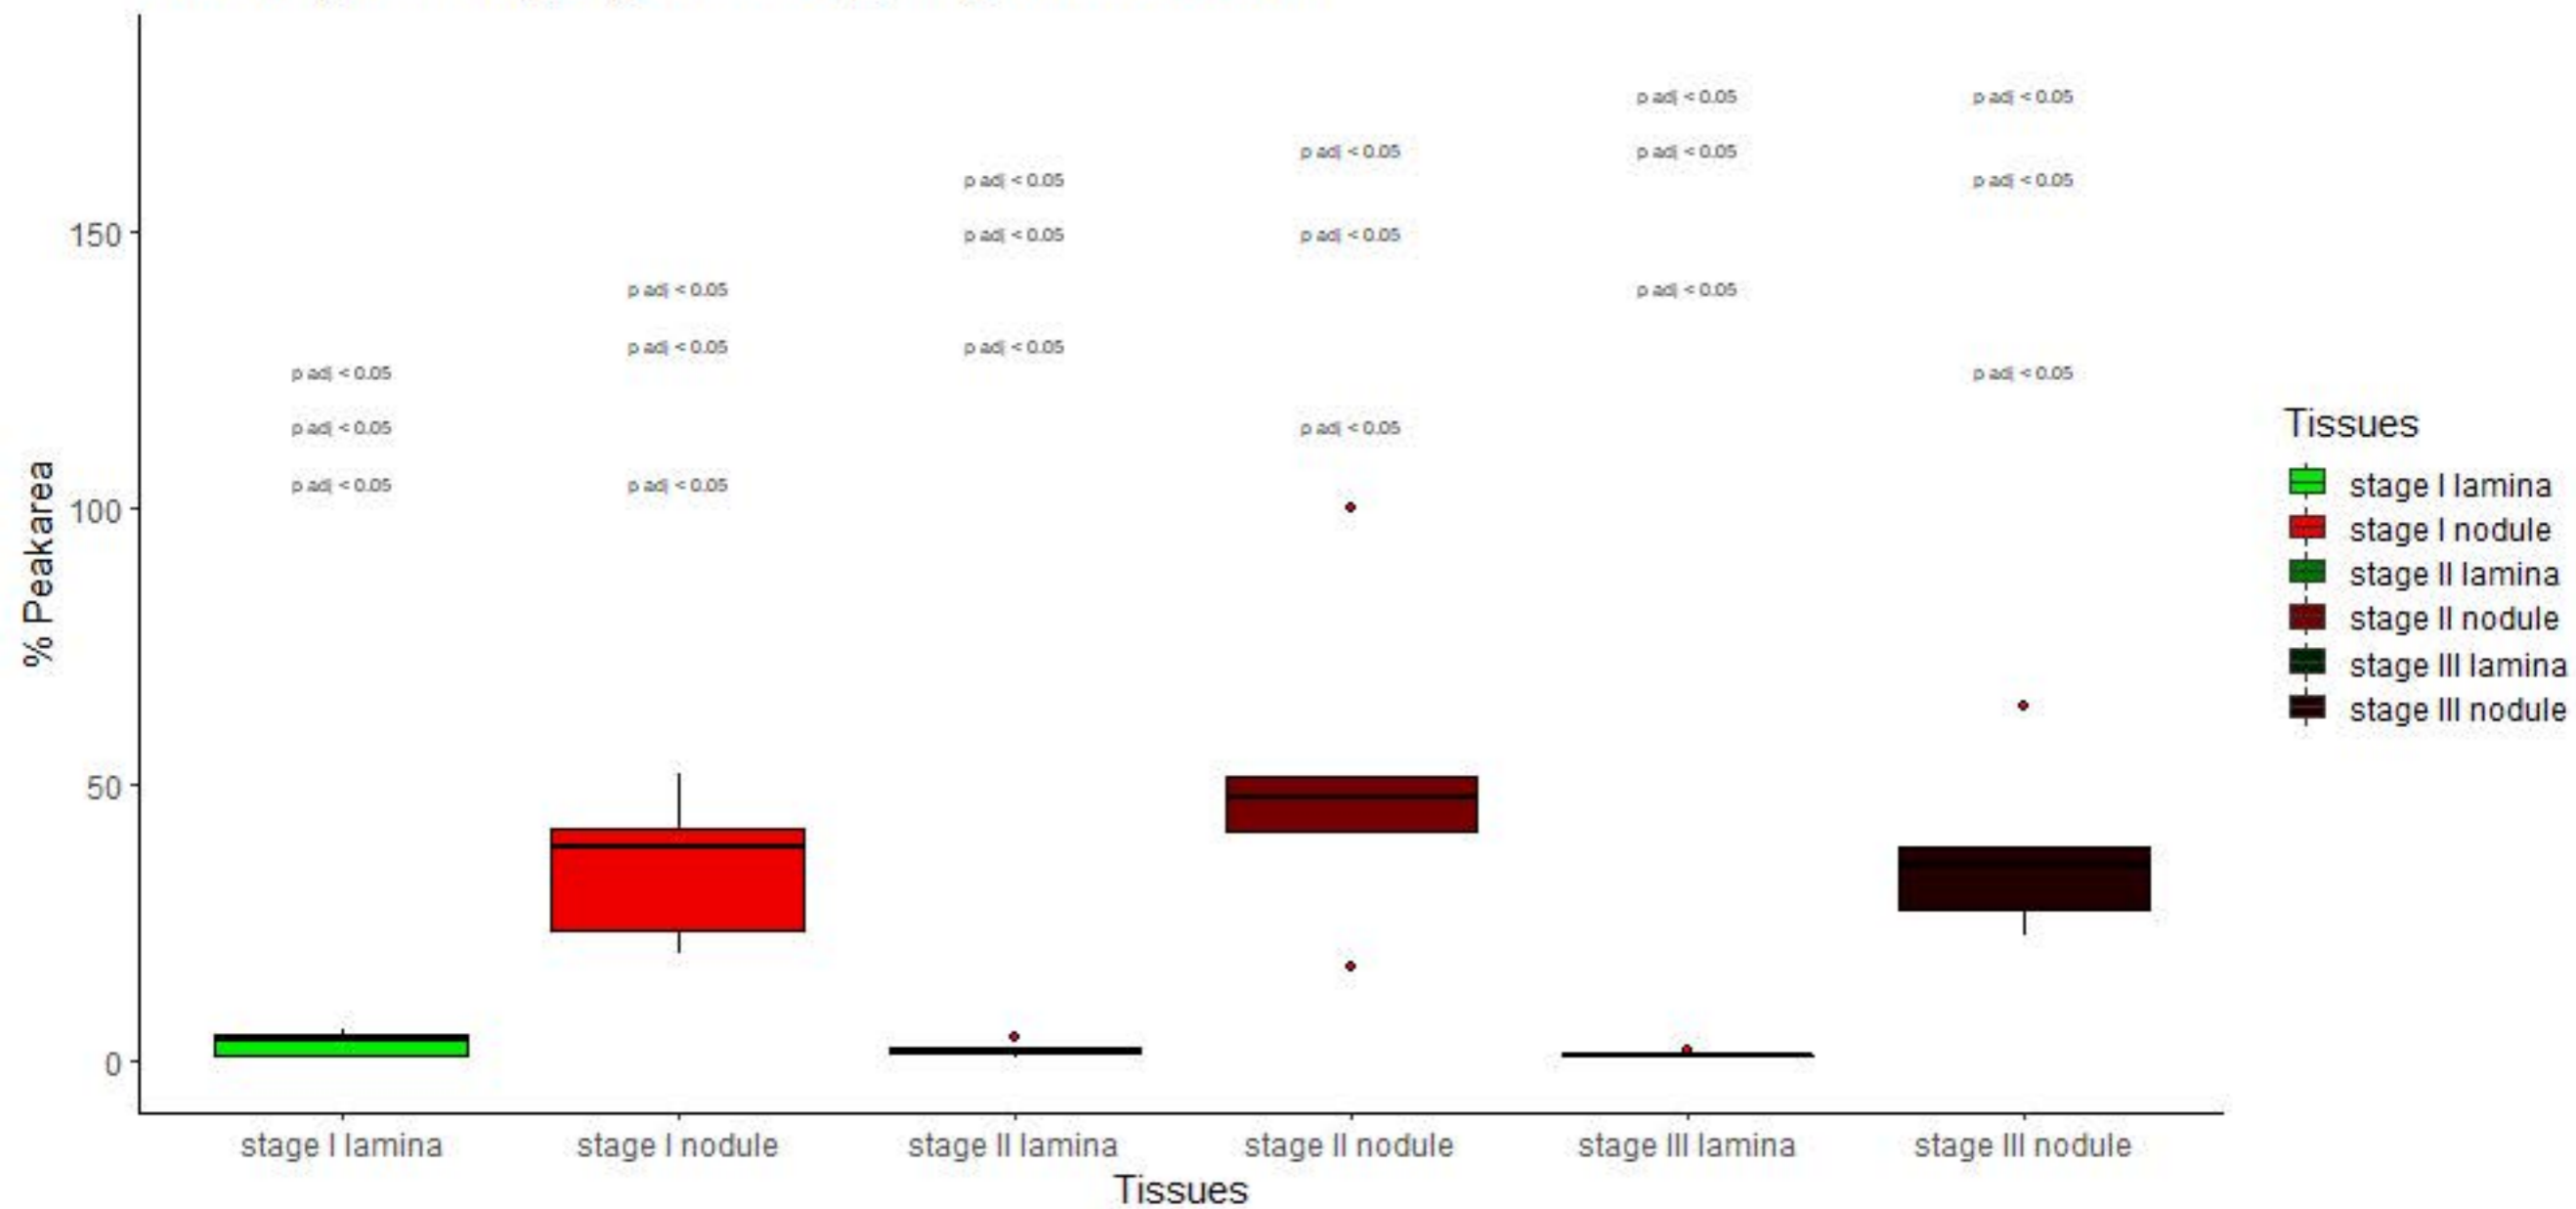



# Putative\_aminosugar\_RT:15.83\_min\_m/z:993.4261

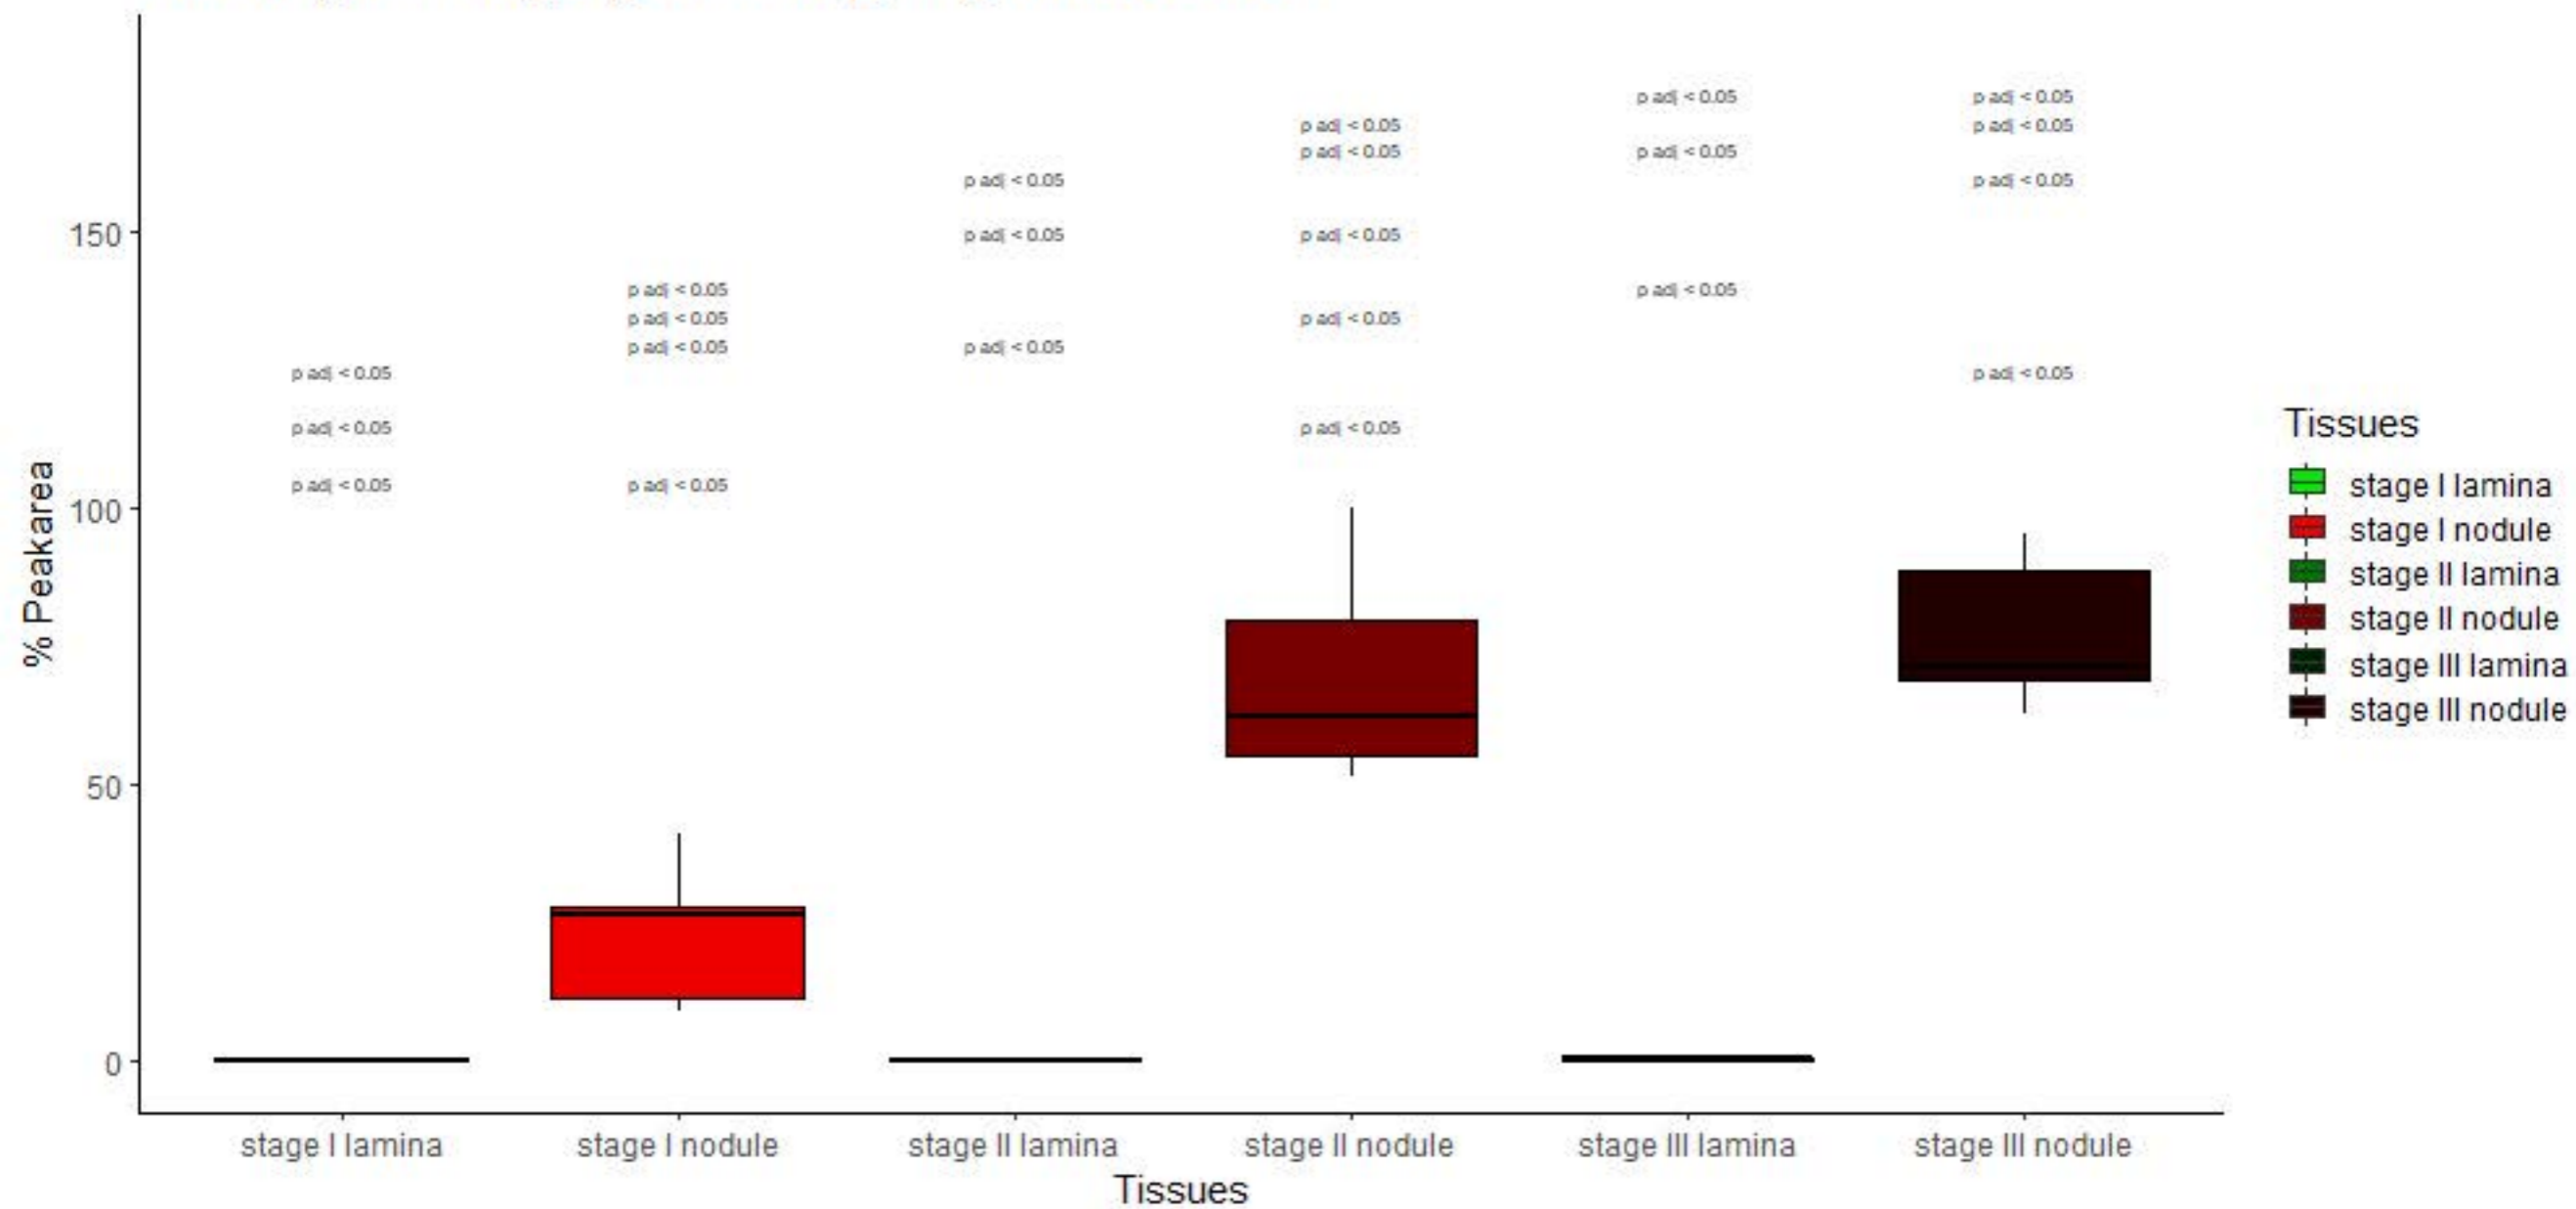

Putative\_aminosugar\_RT:16.28\_min\_m/z:680.2769

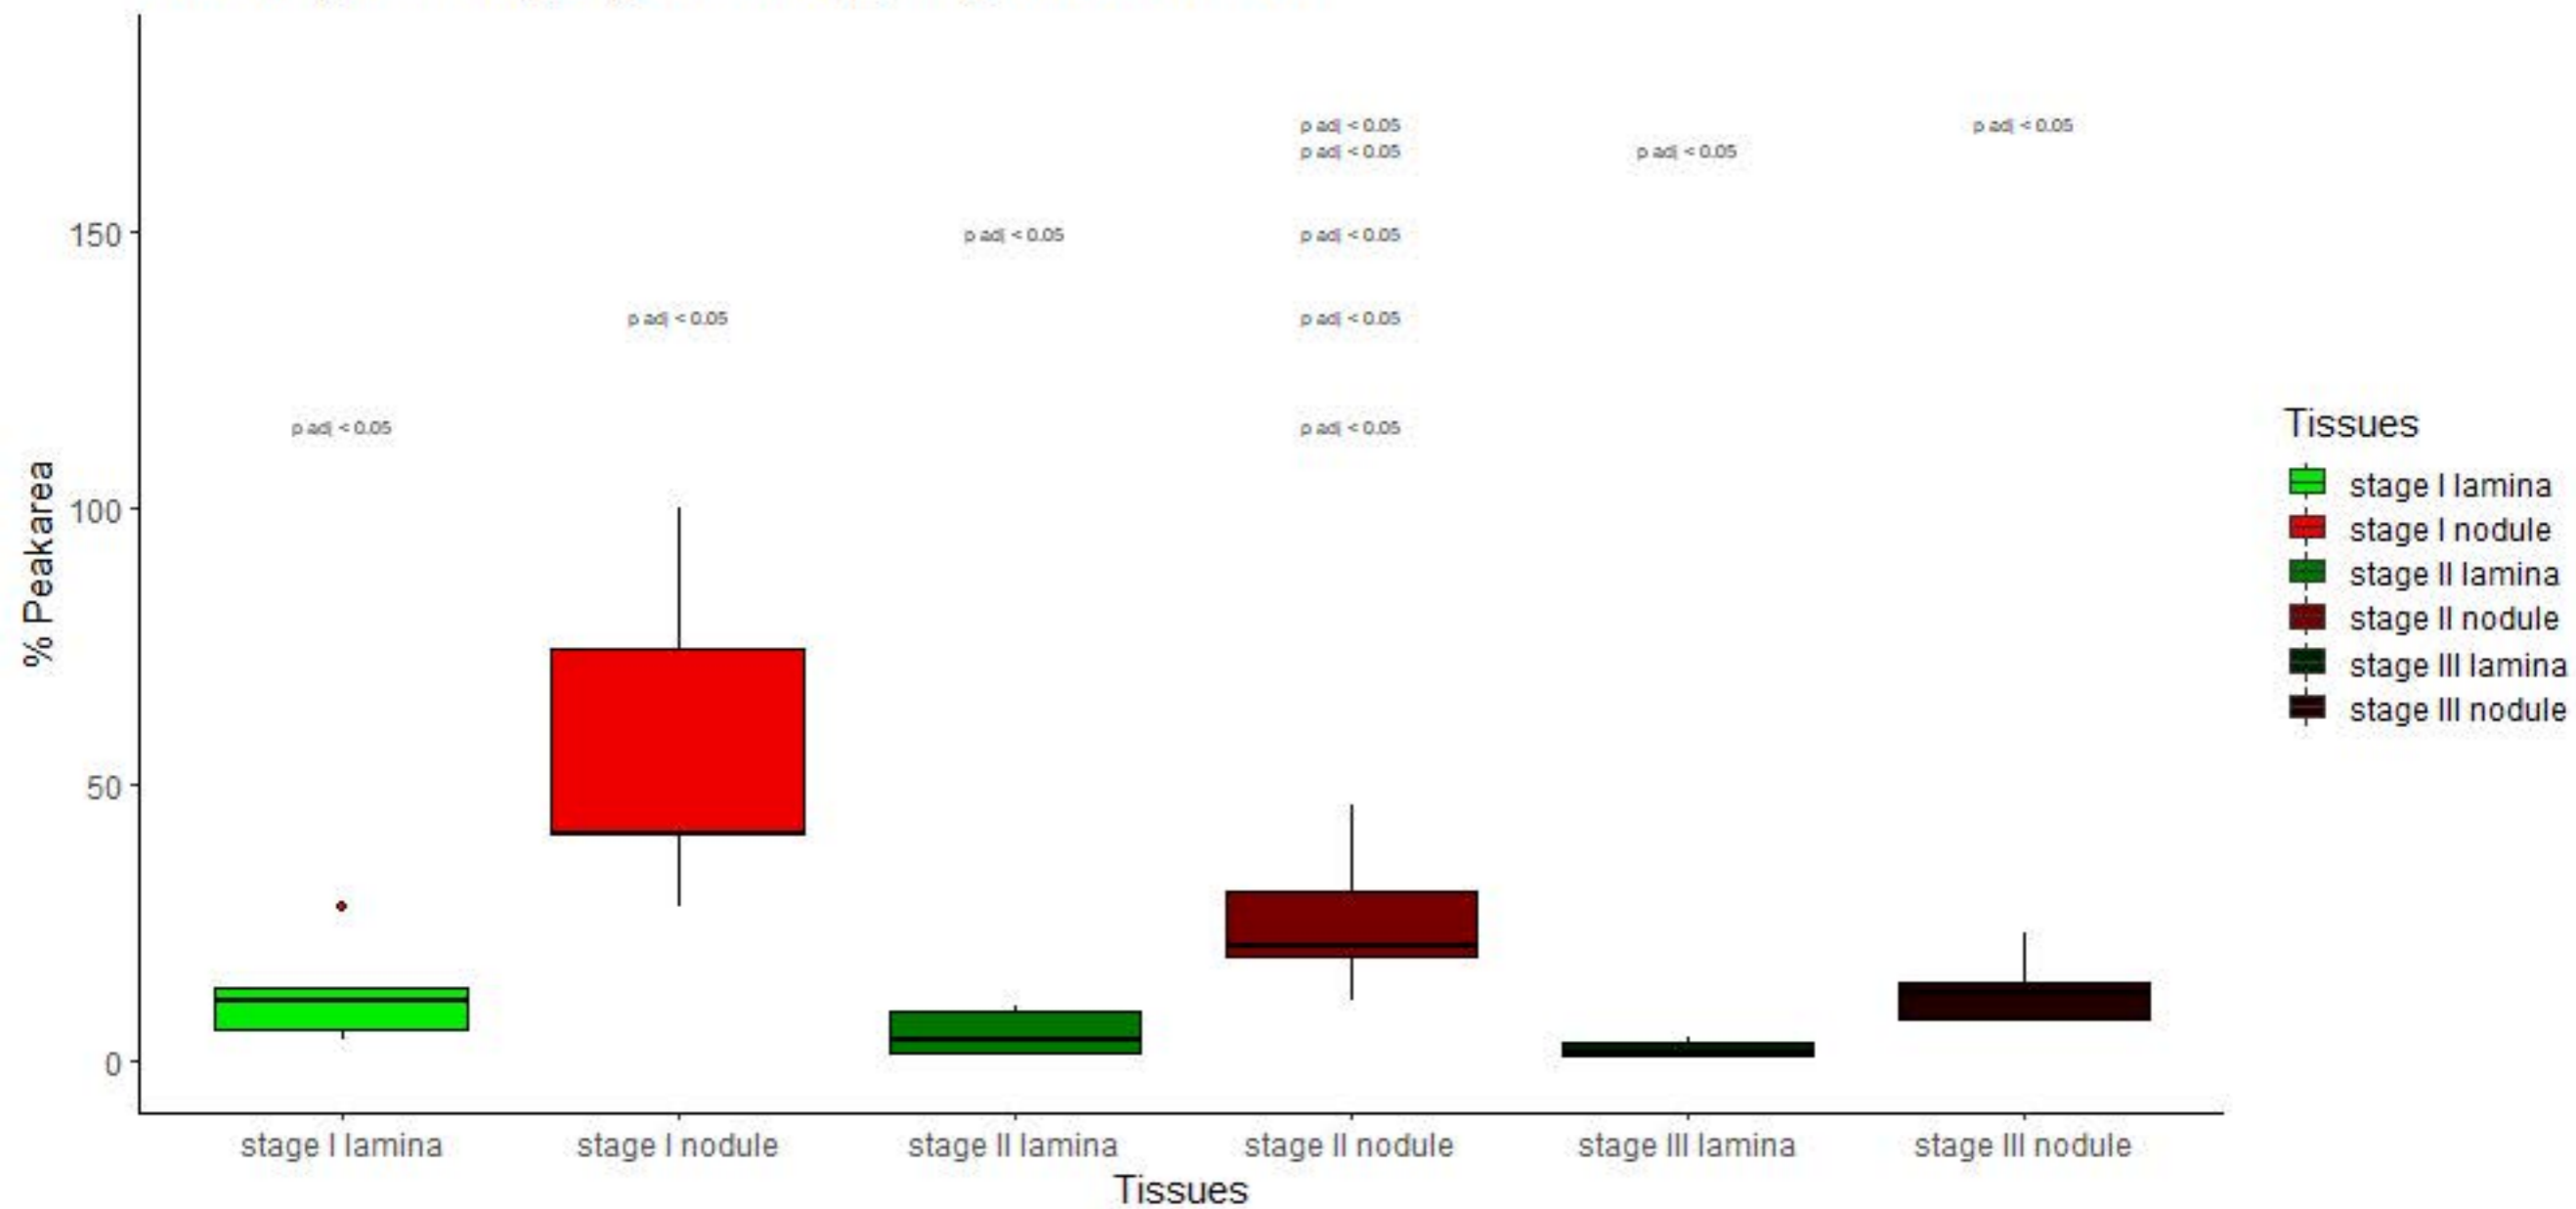

Putative\_aminosugar\_RT:16.29\_min\_m/z:476.1871

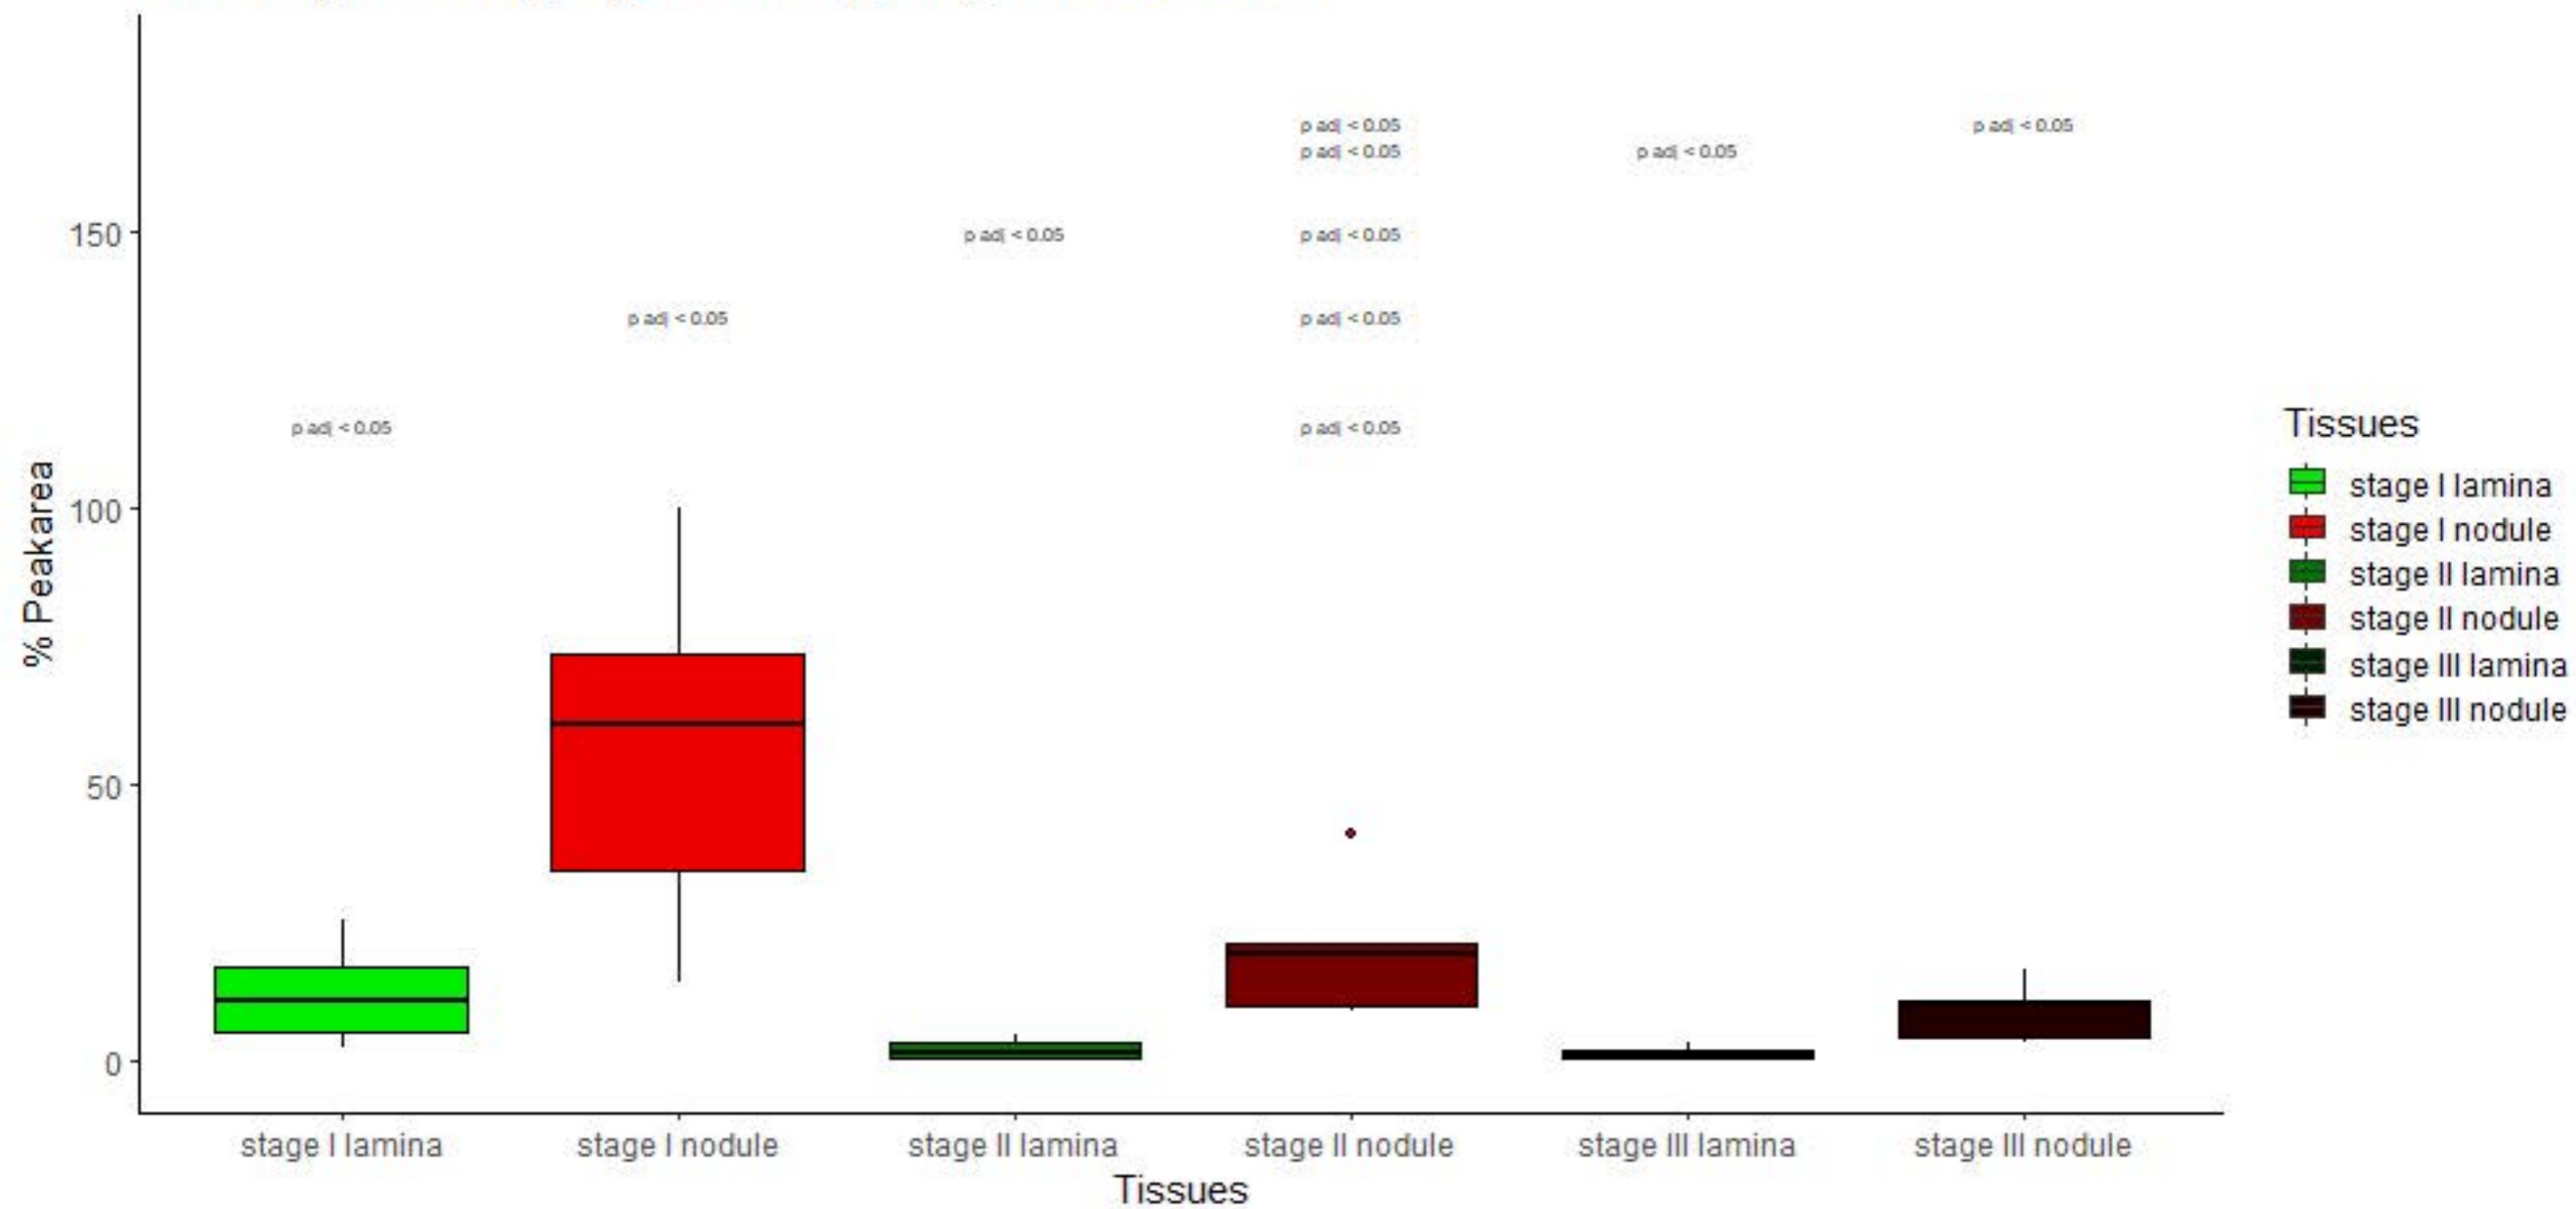

Putative\_aminosugar\_RT:16.36\_min\_m/z:679.2664

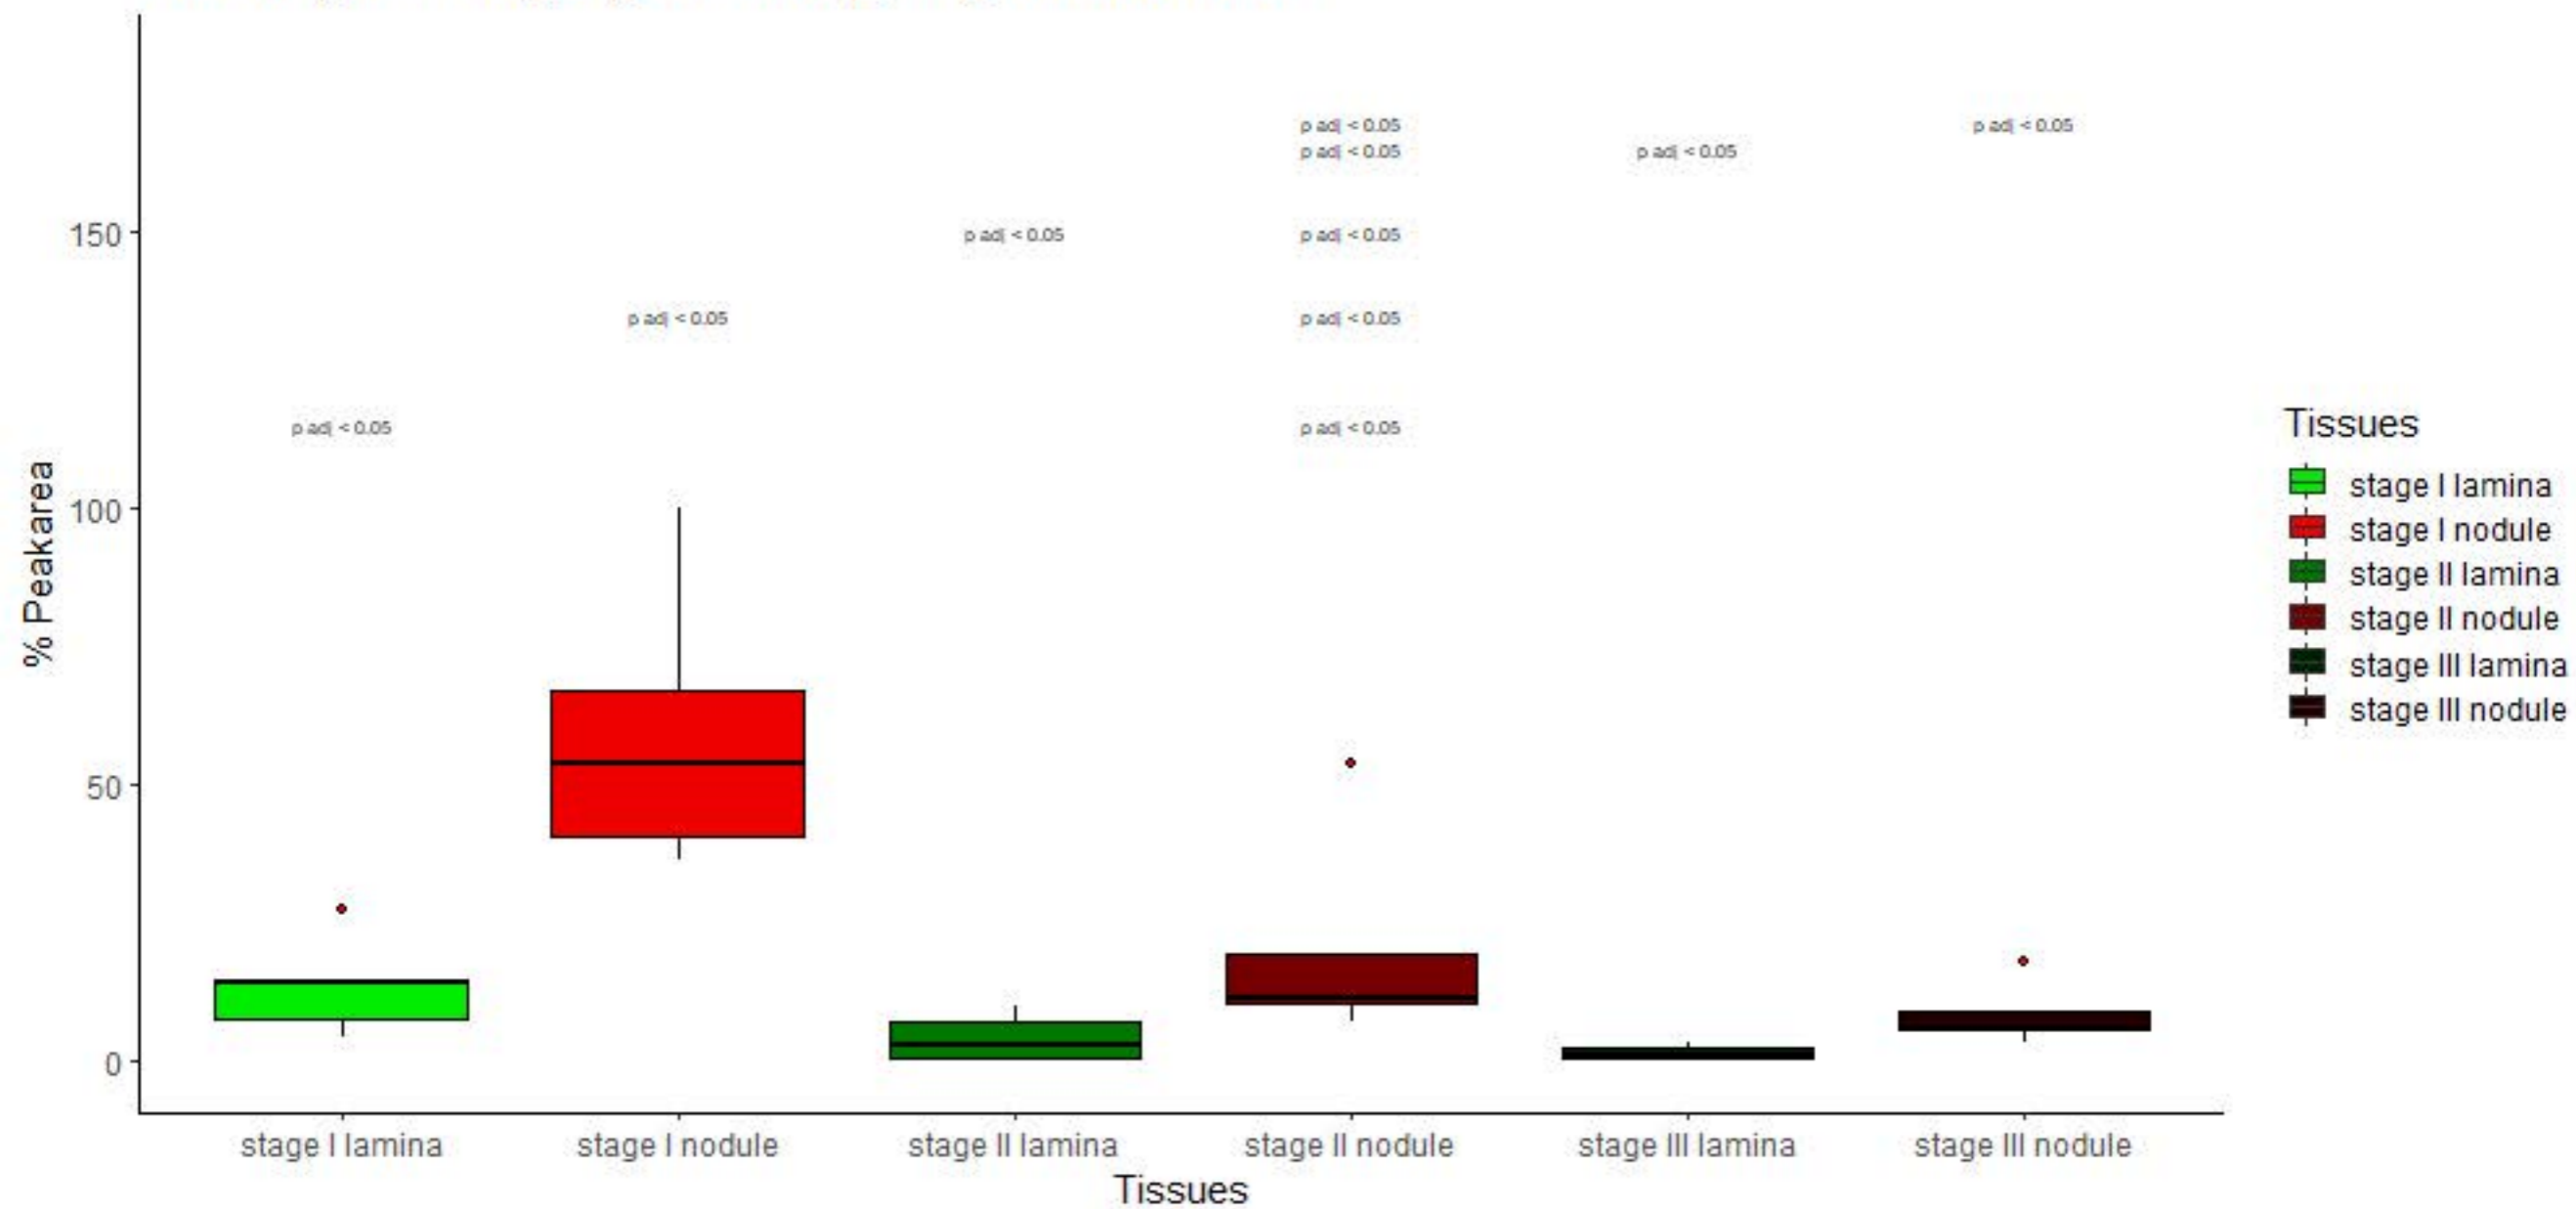

# Putative\_aminosugar\_RT:13.96\_min\_m/z:647.2878

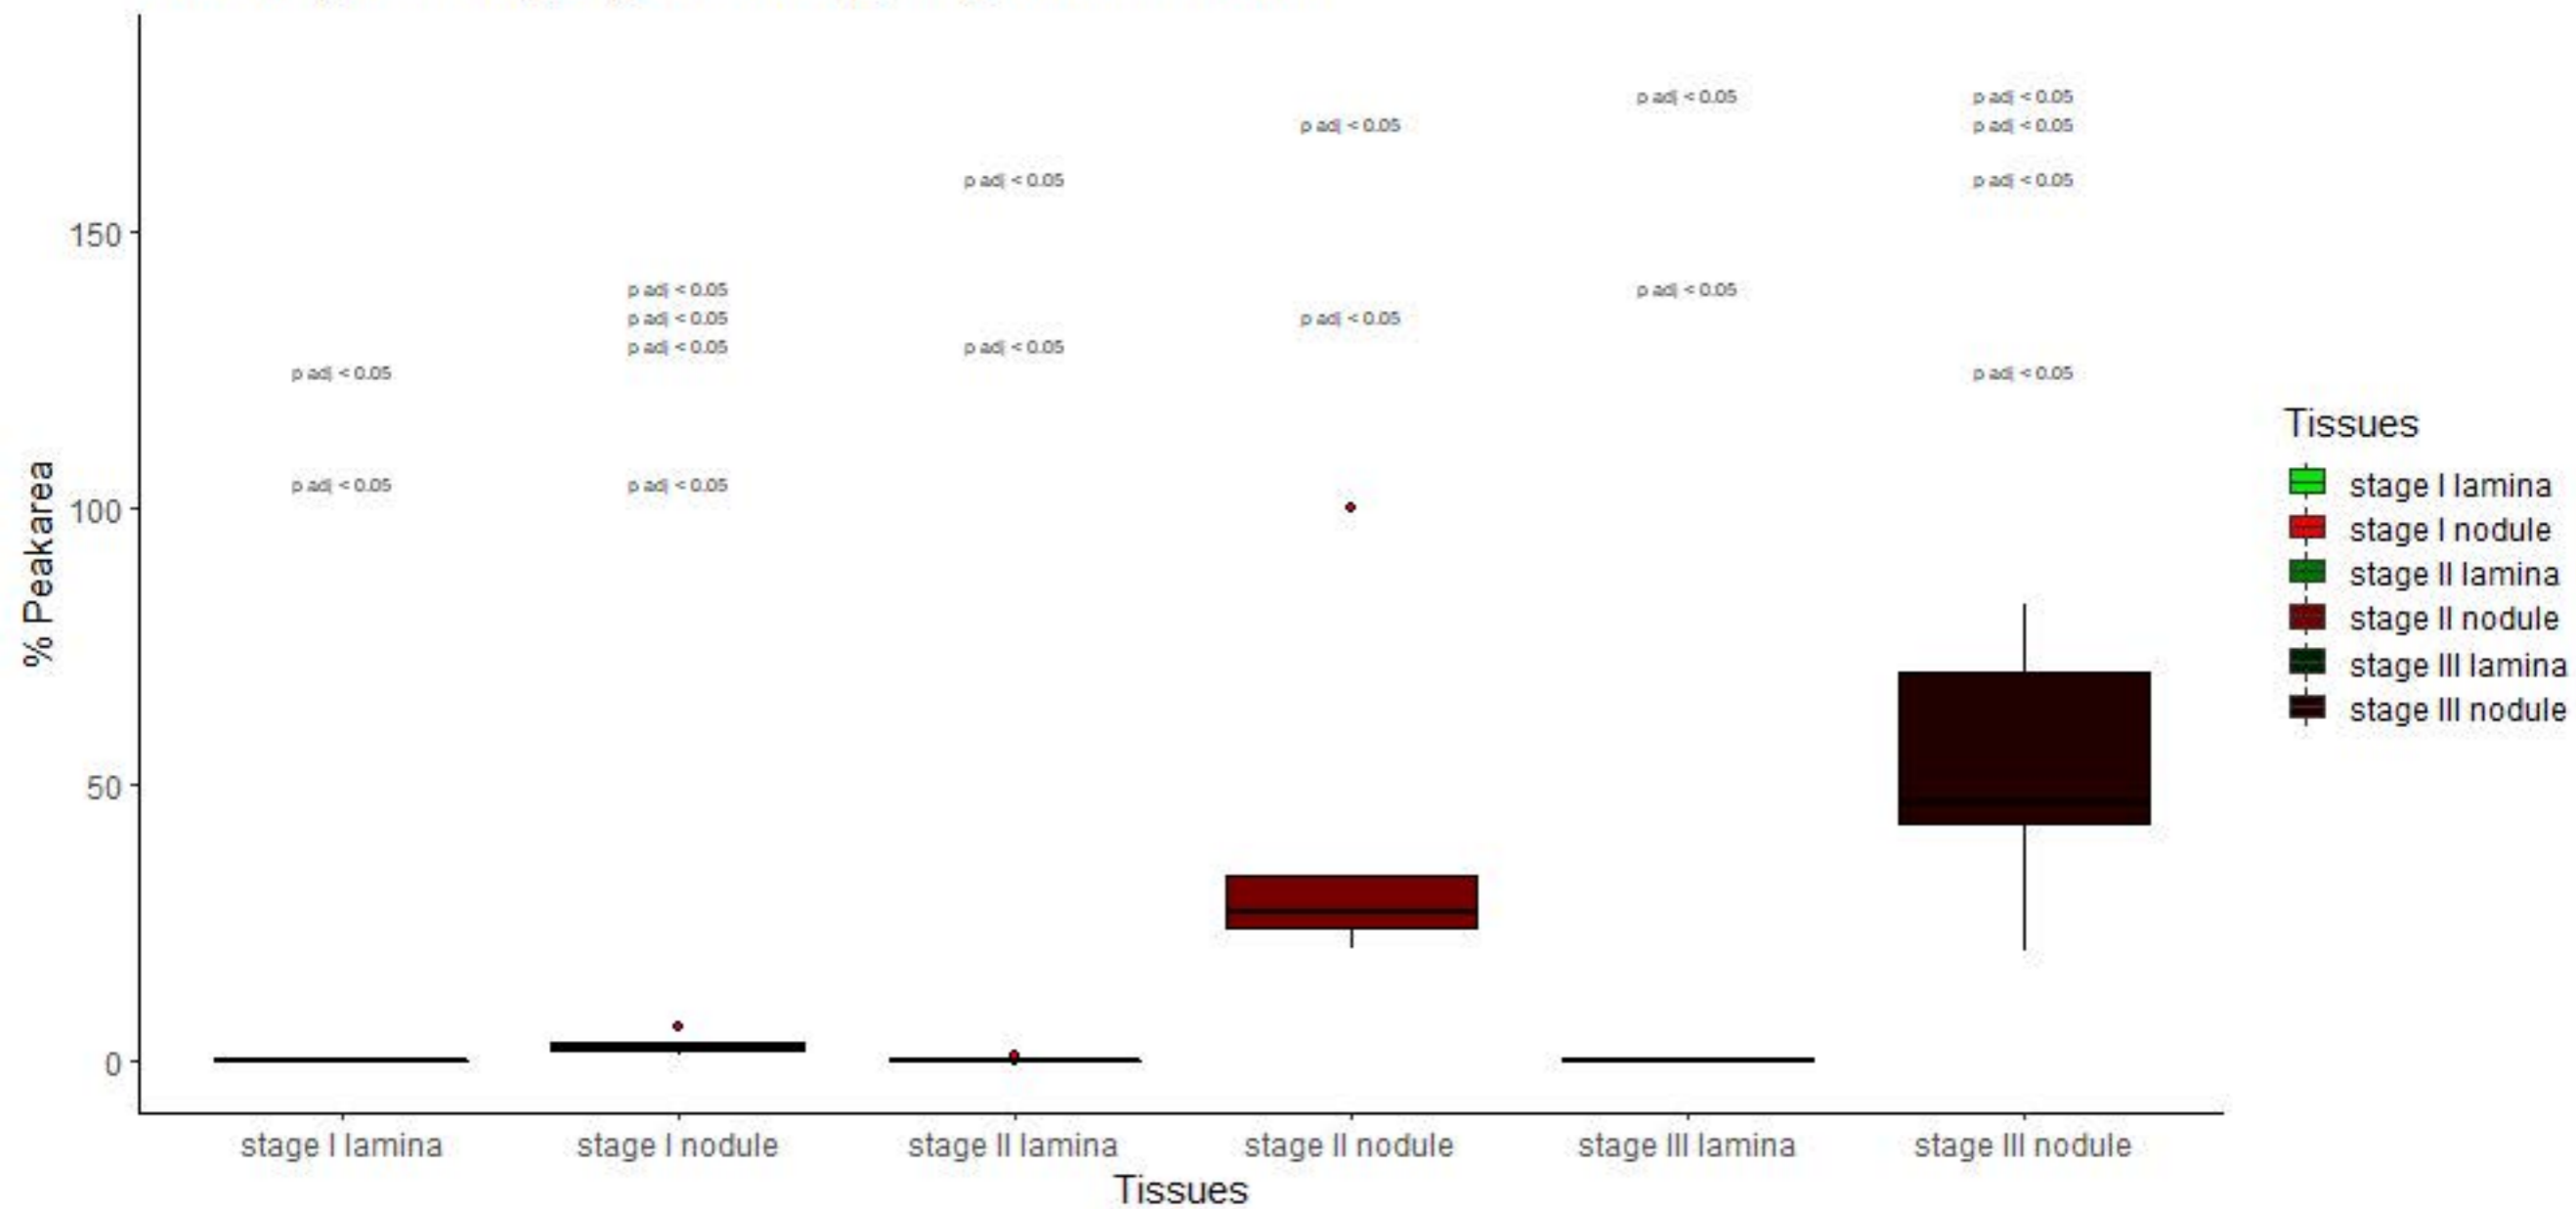

## Putative\_aminosugar\_RT:14.38\_min\_m/z:850.3661

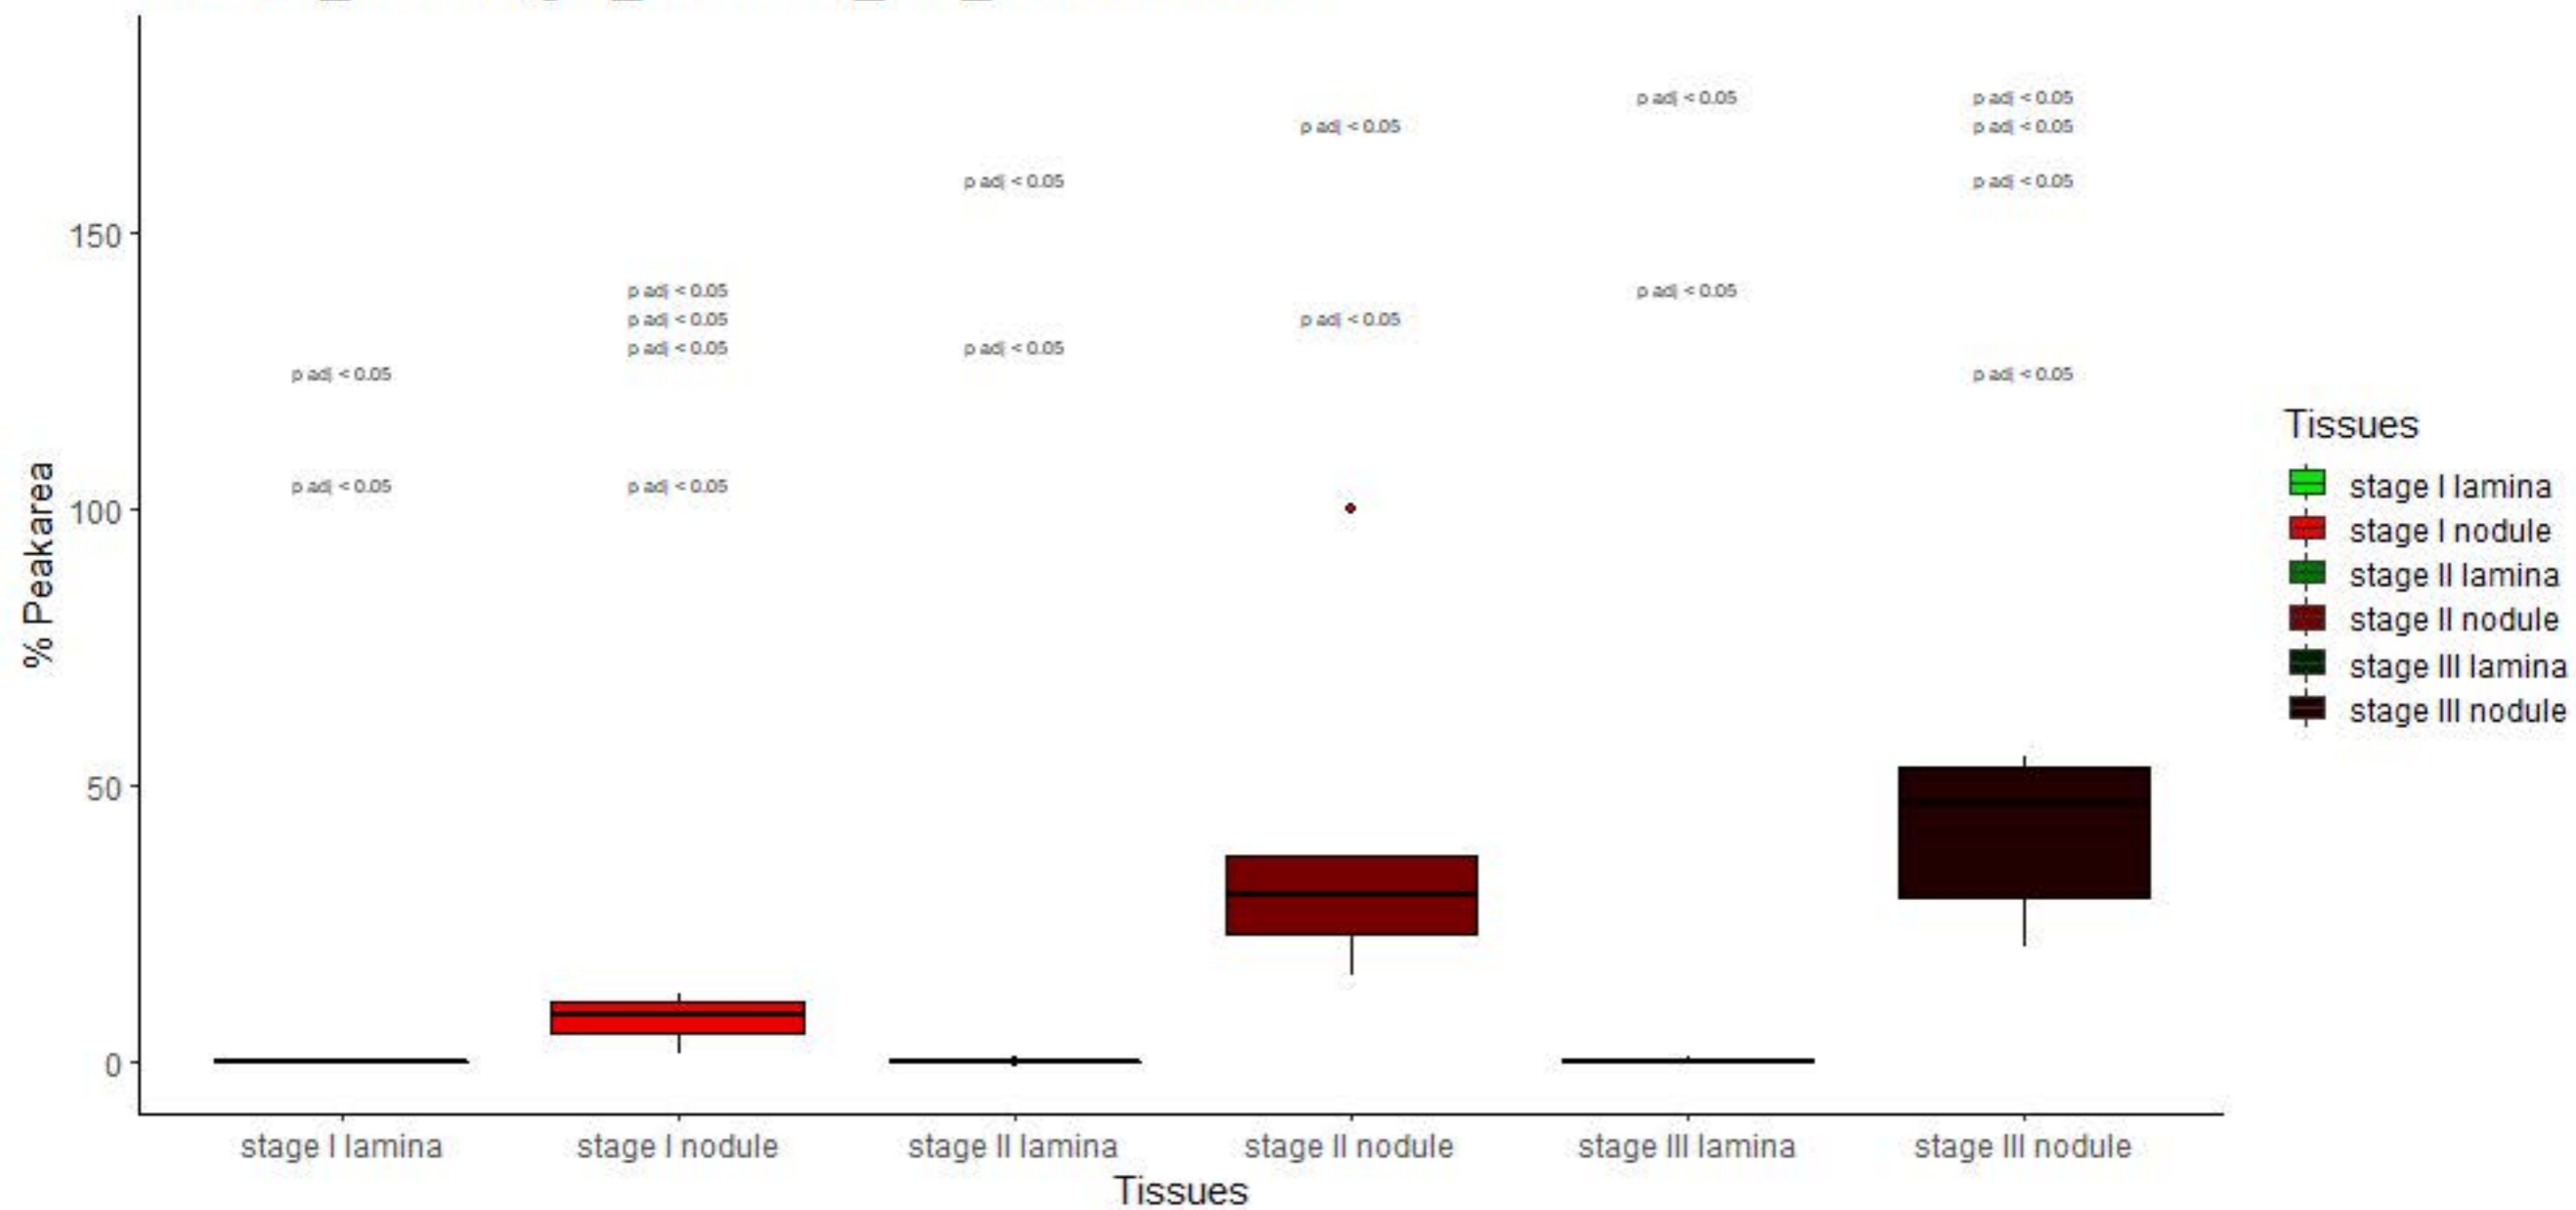



## Putative\_aminosugar\_RT:15.56\_min\_m/z:892.3788

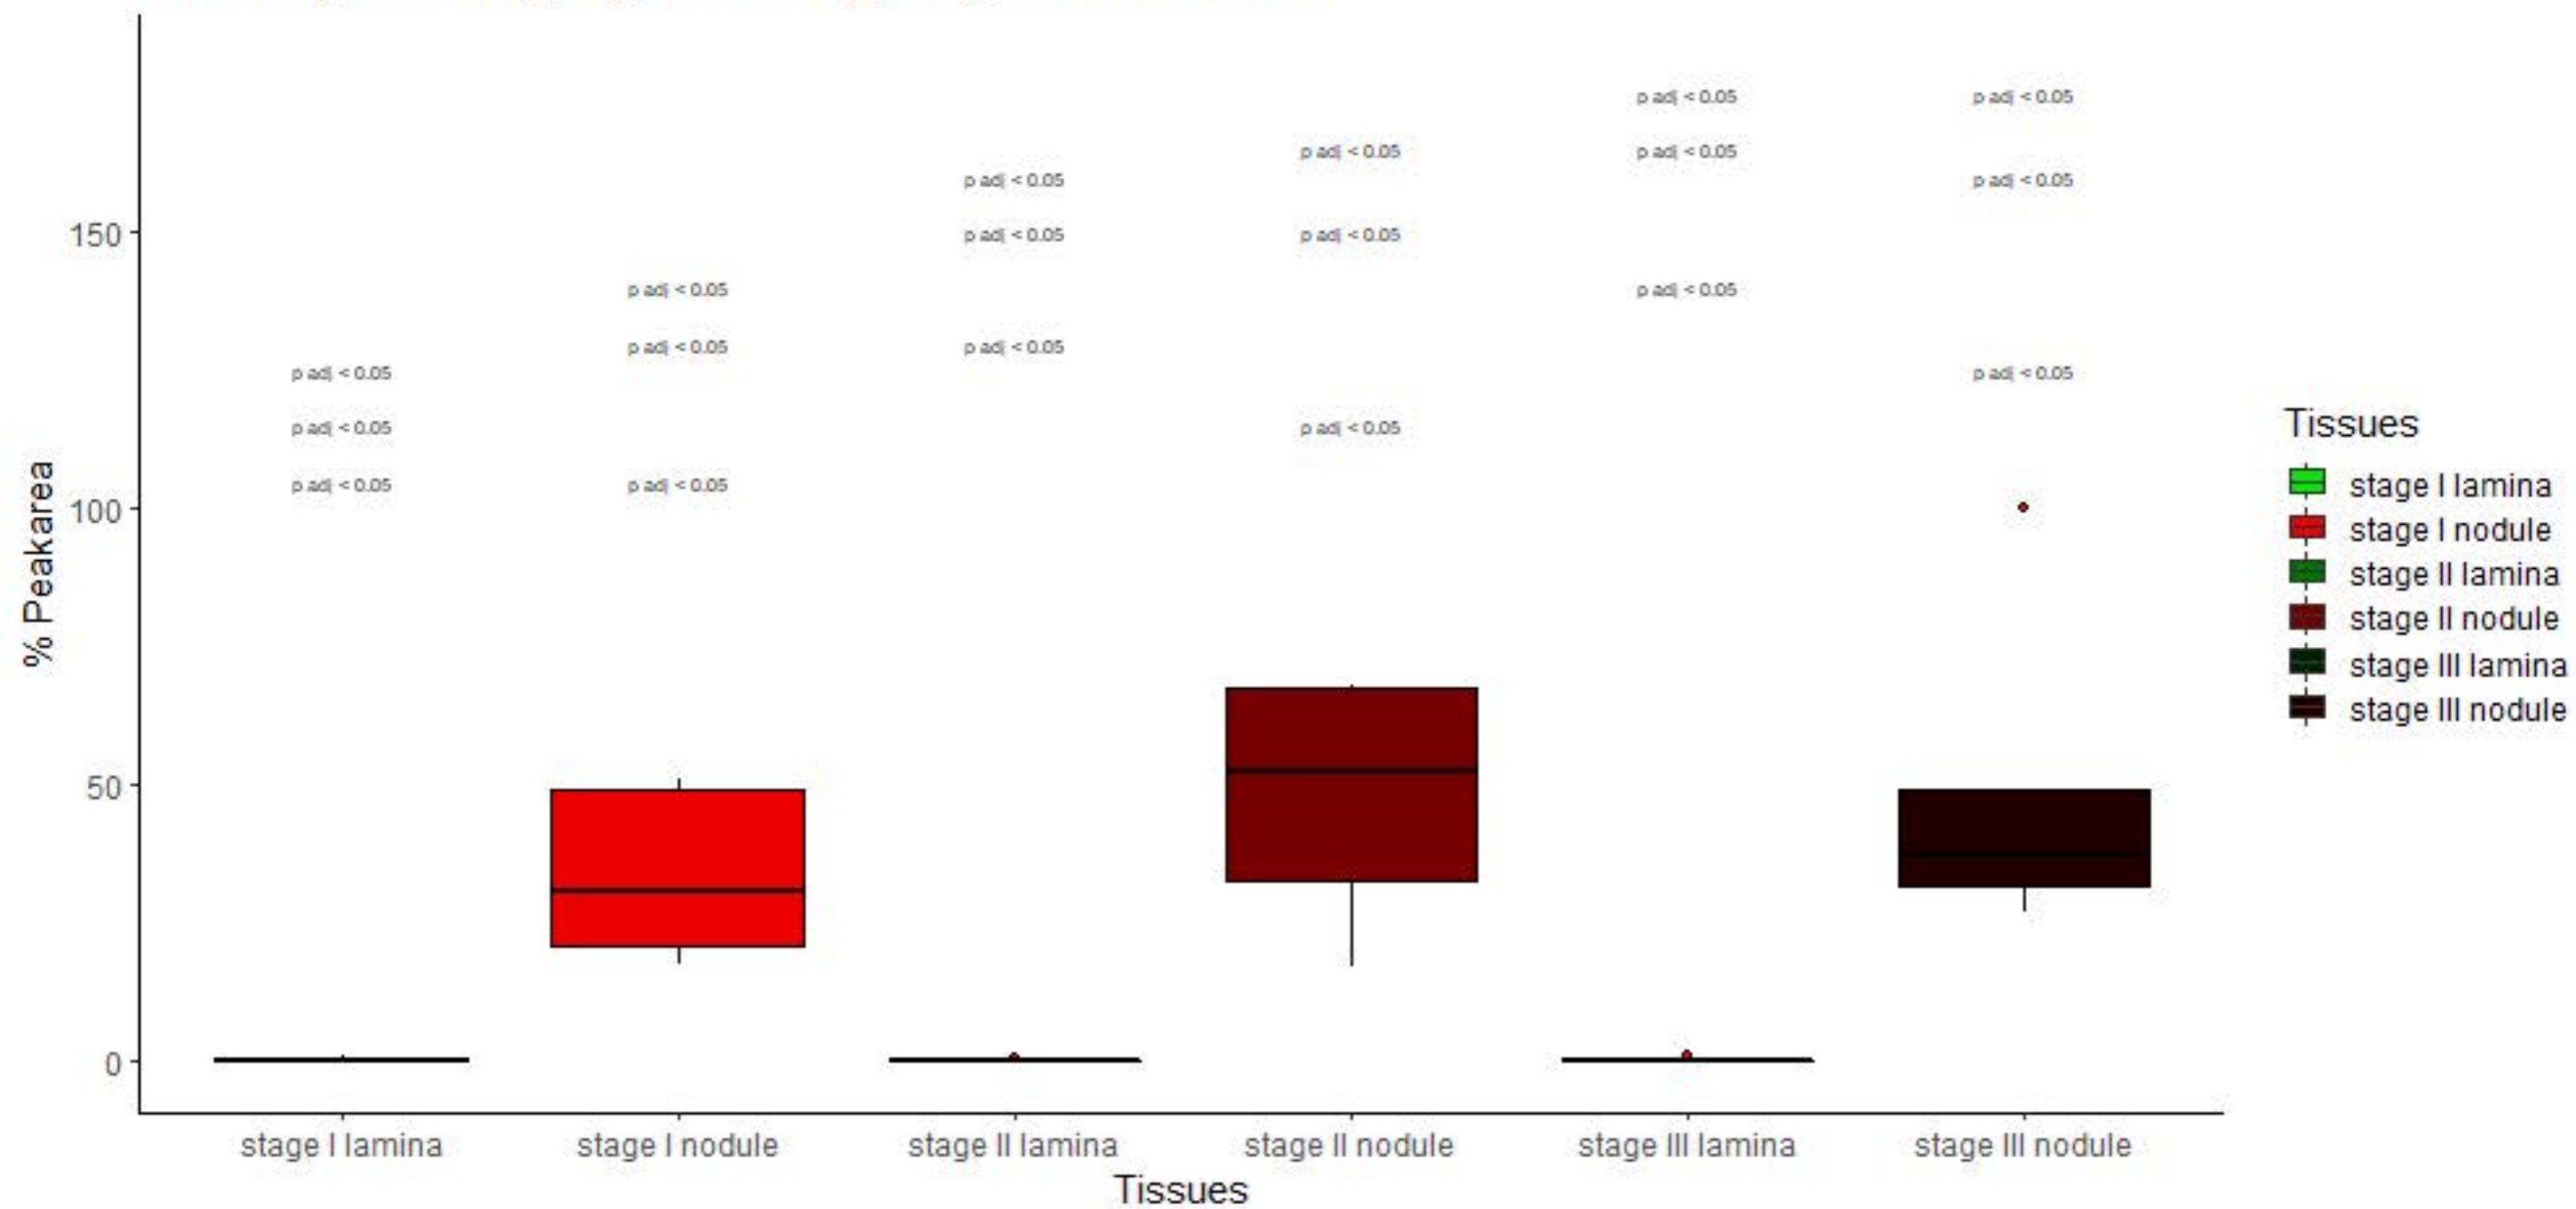

## Putative\_aminosugar\_RT:15.24\_min\_m/z:689.2983

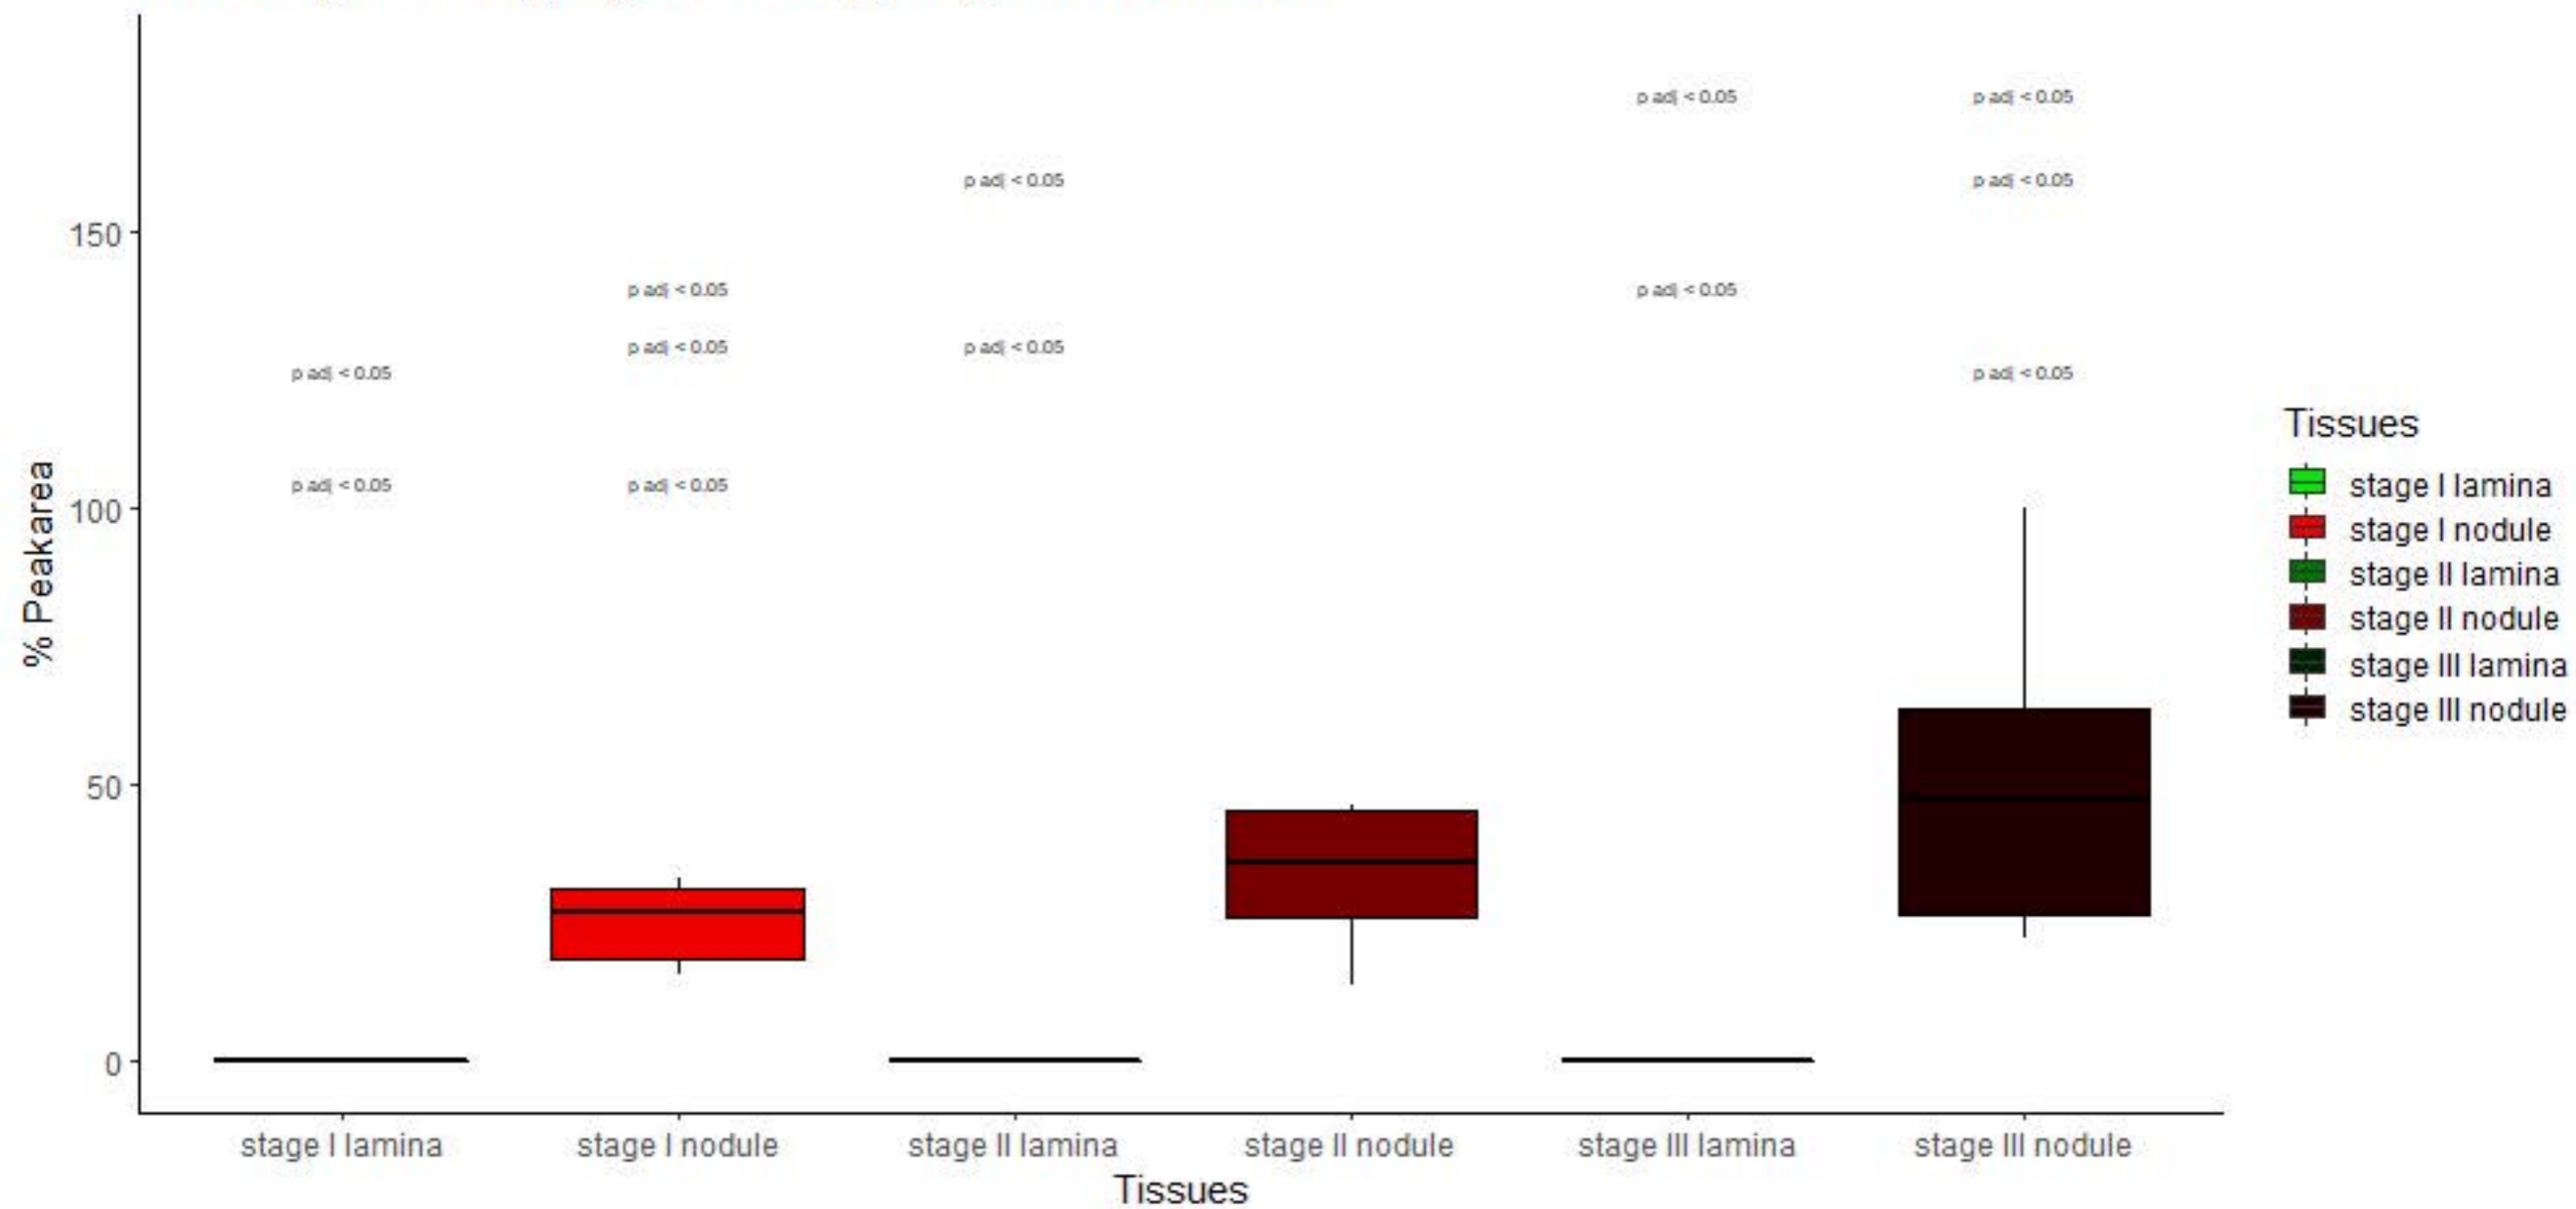

## Putative\_aminosugar\_RT:14.14\_min\_m/z:648.2713

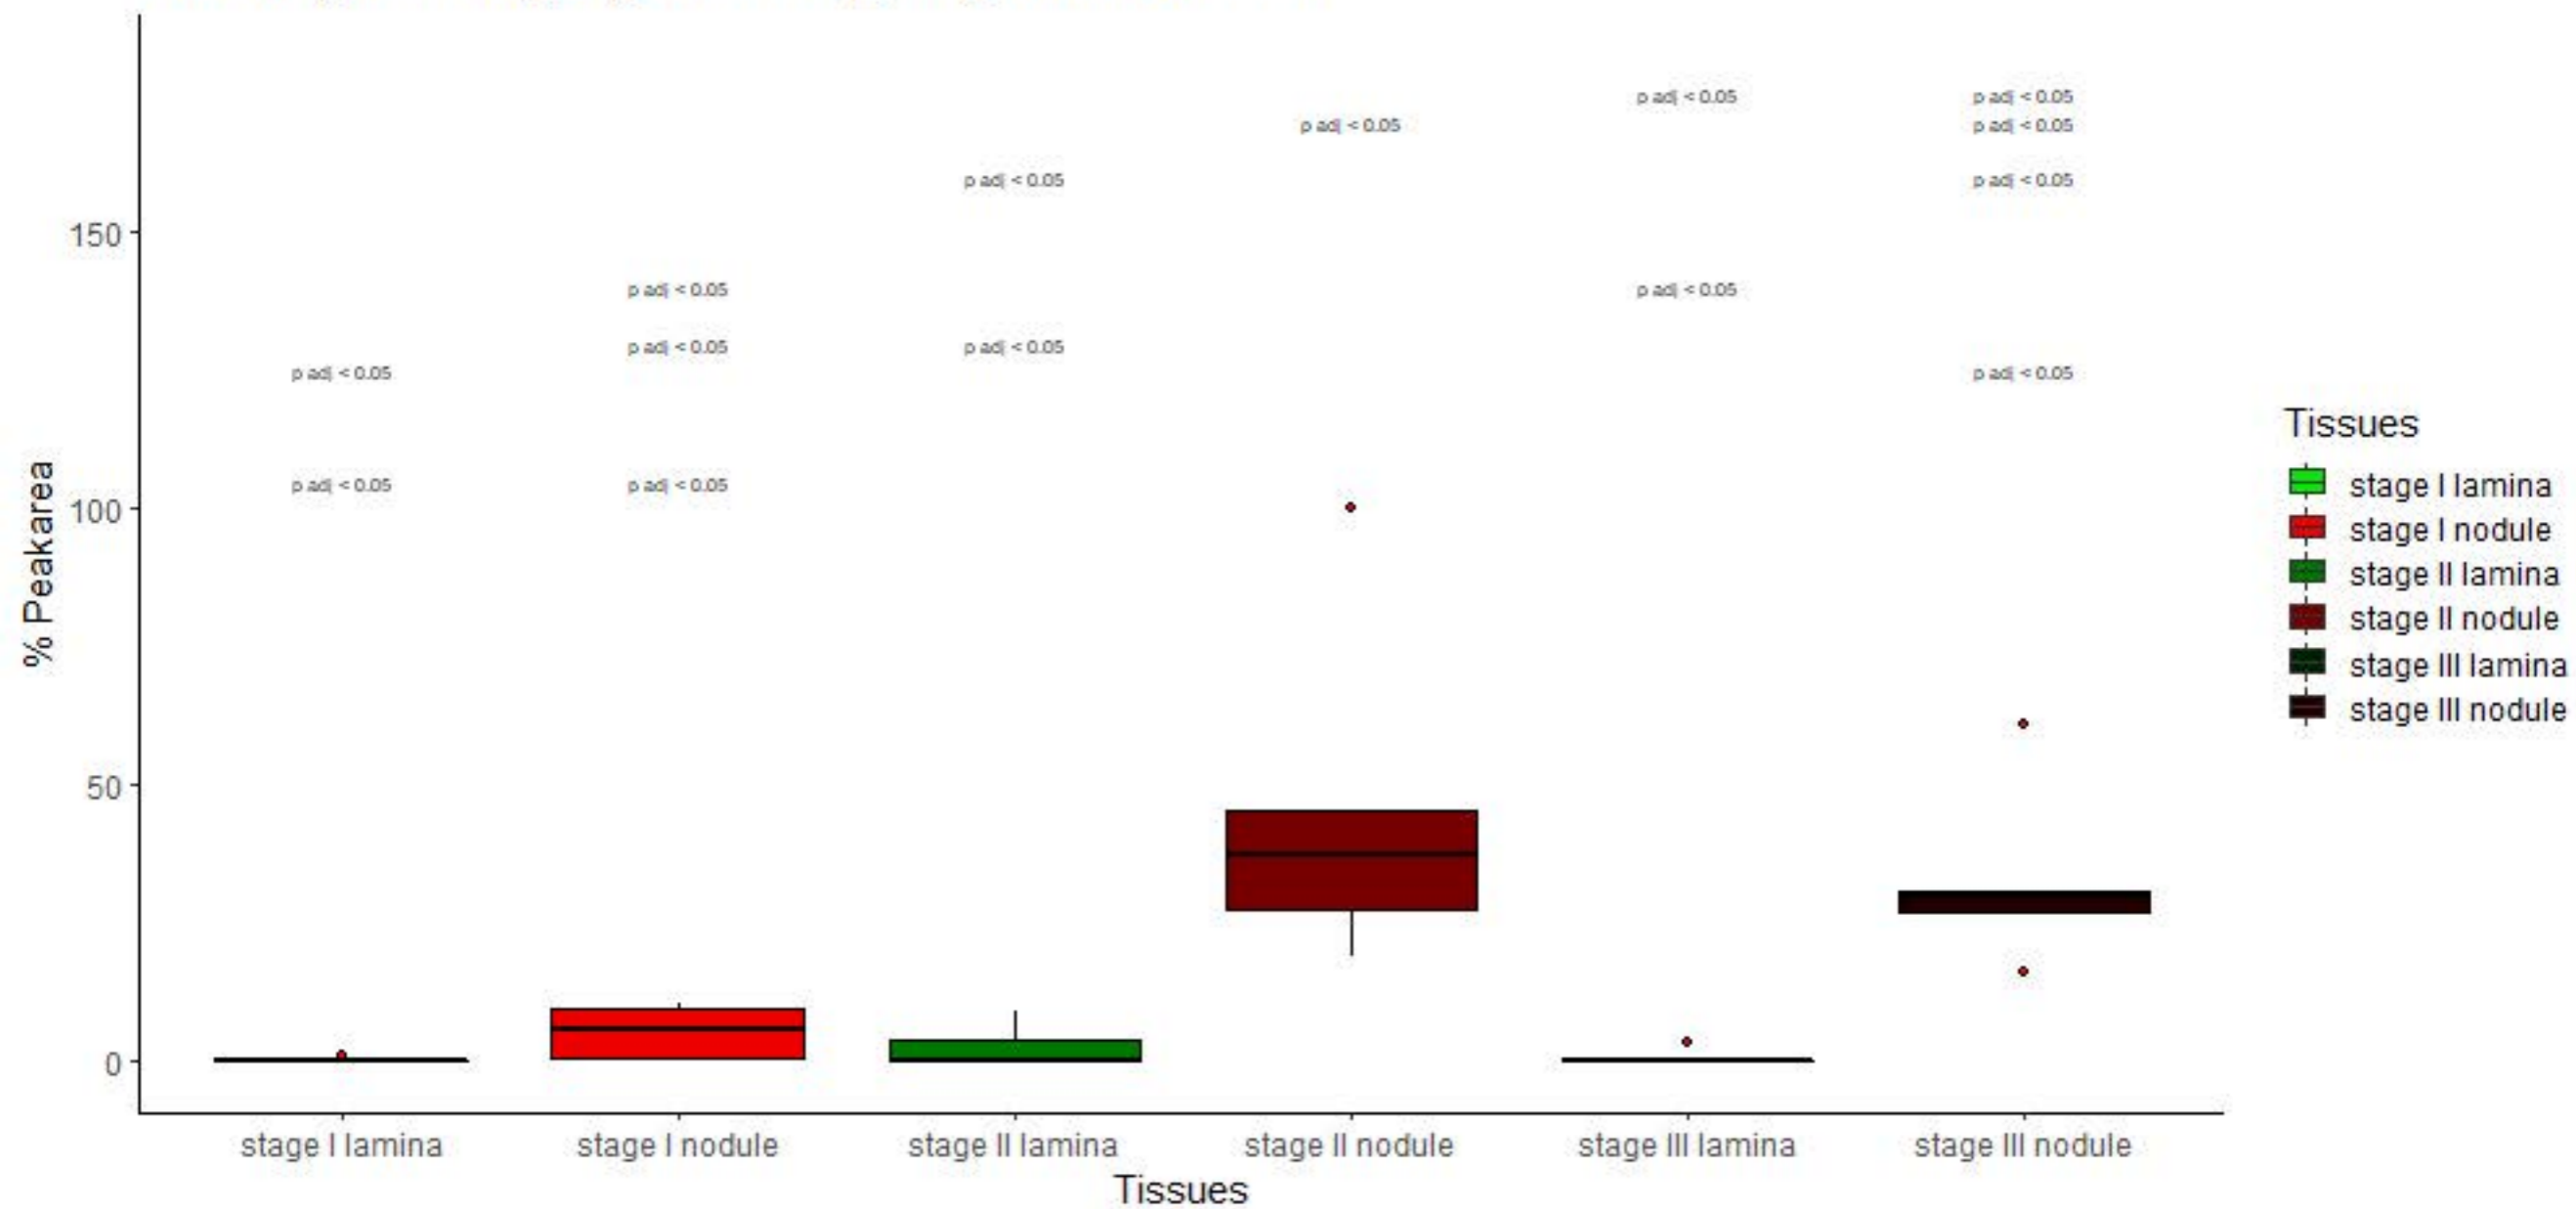

FR900359\_RT:48.38\_min\_m/z:1002.5394

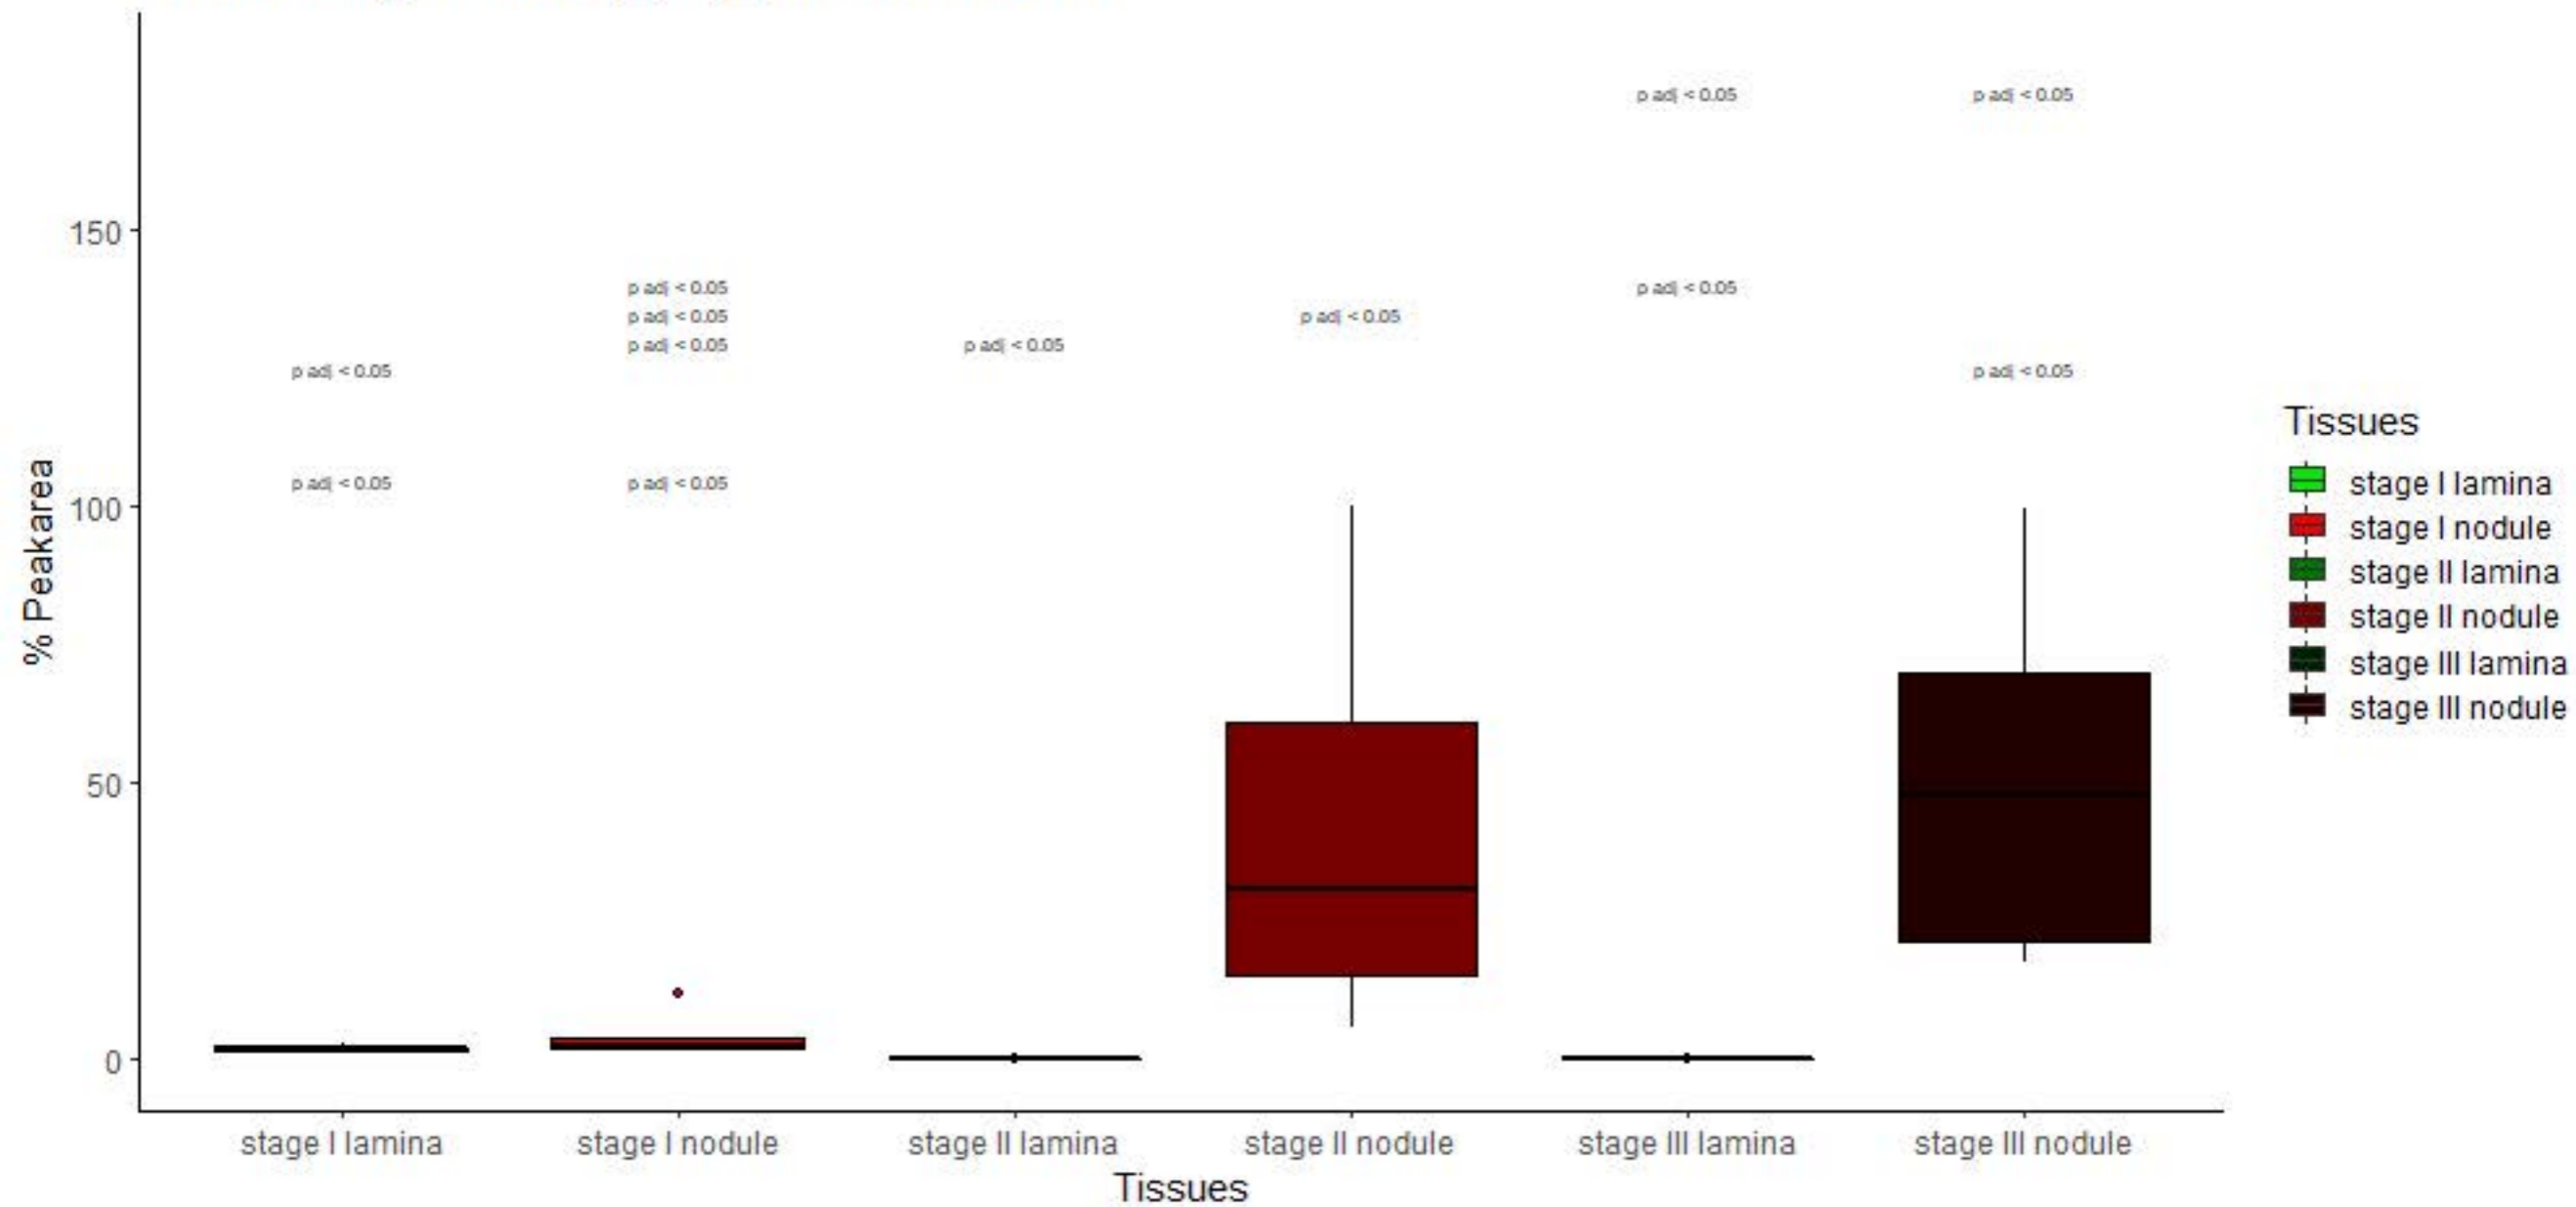

## AC-1\_RT:44.25\_min\_m/z:1032.5500

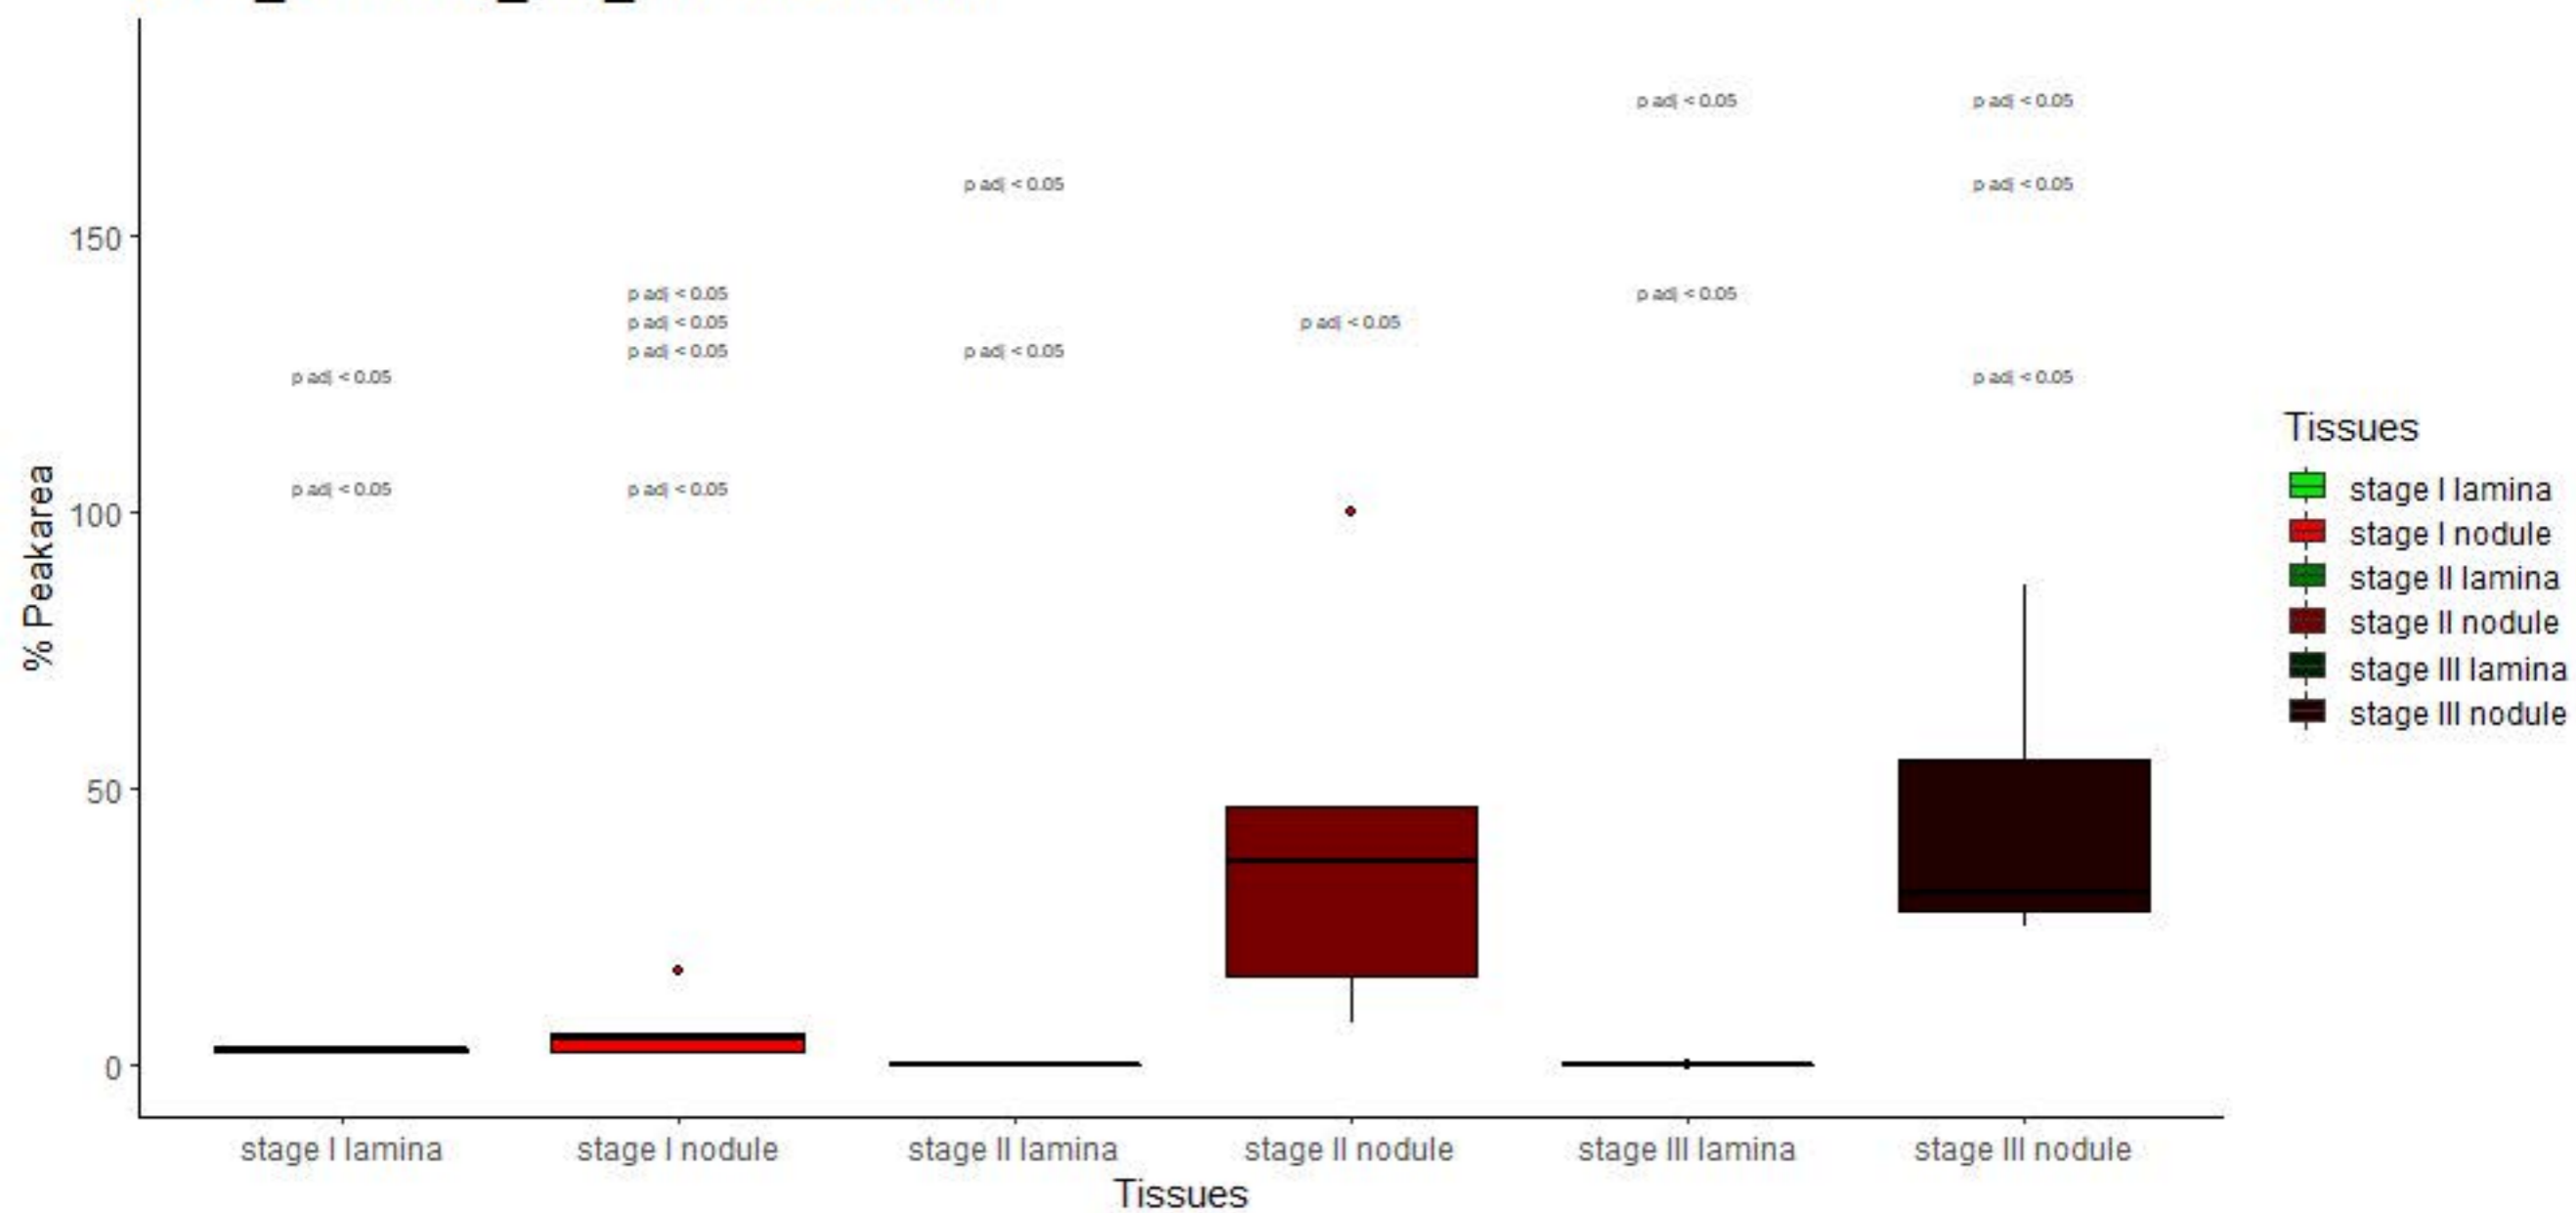

AC-SC\_RT:39.74\_min\_m/z:817.4342

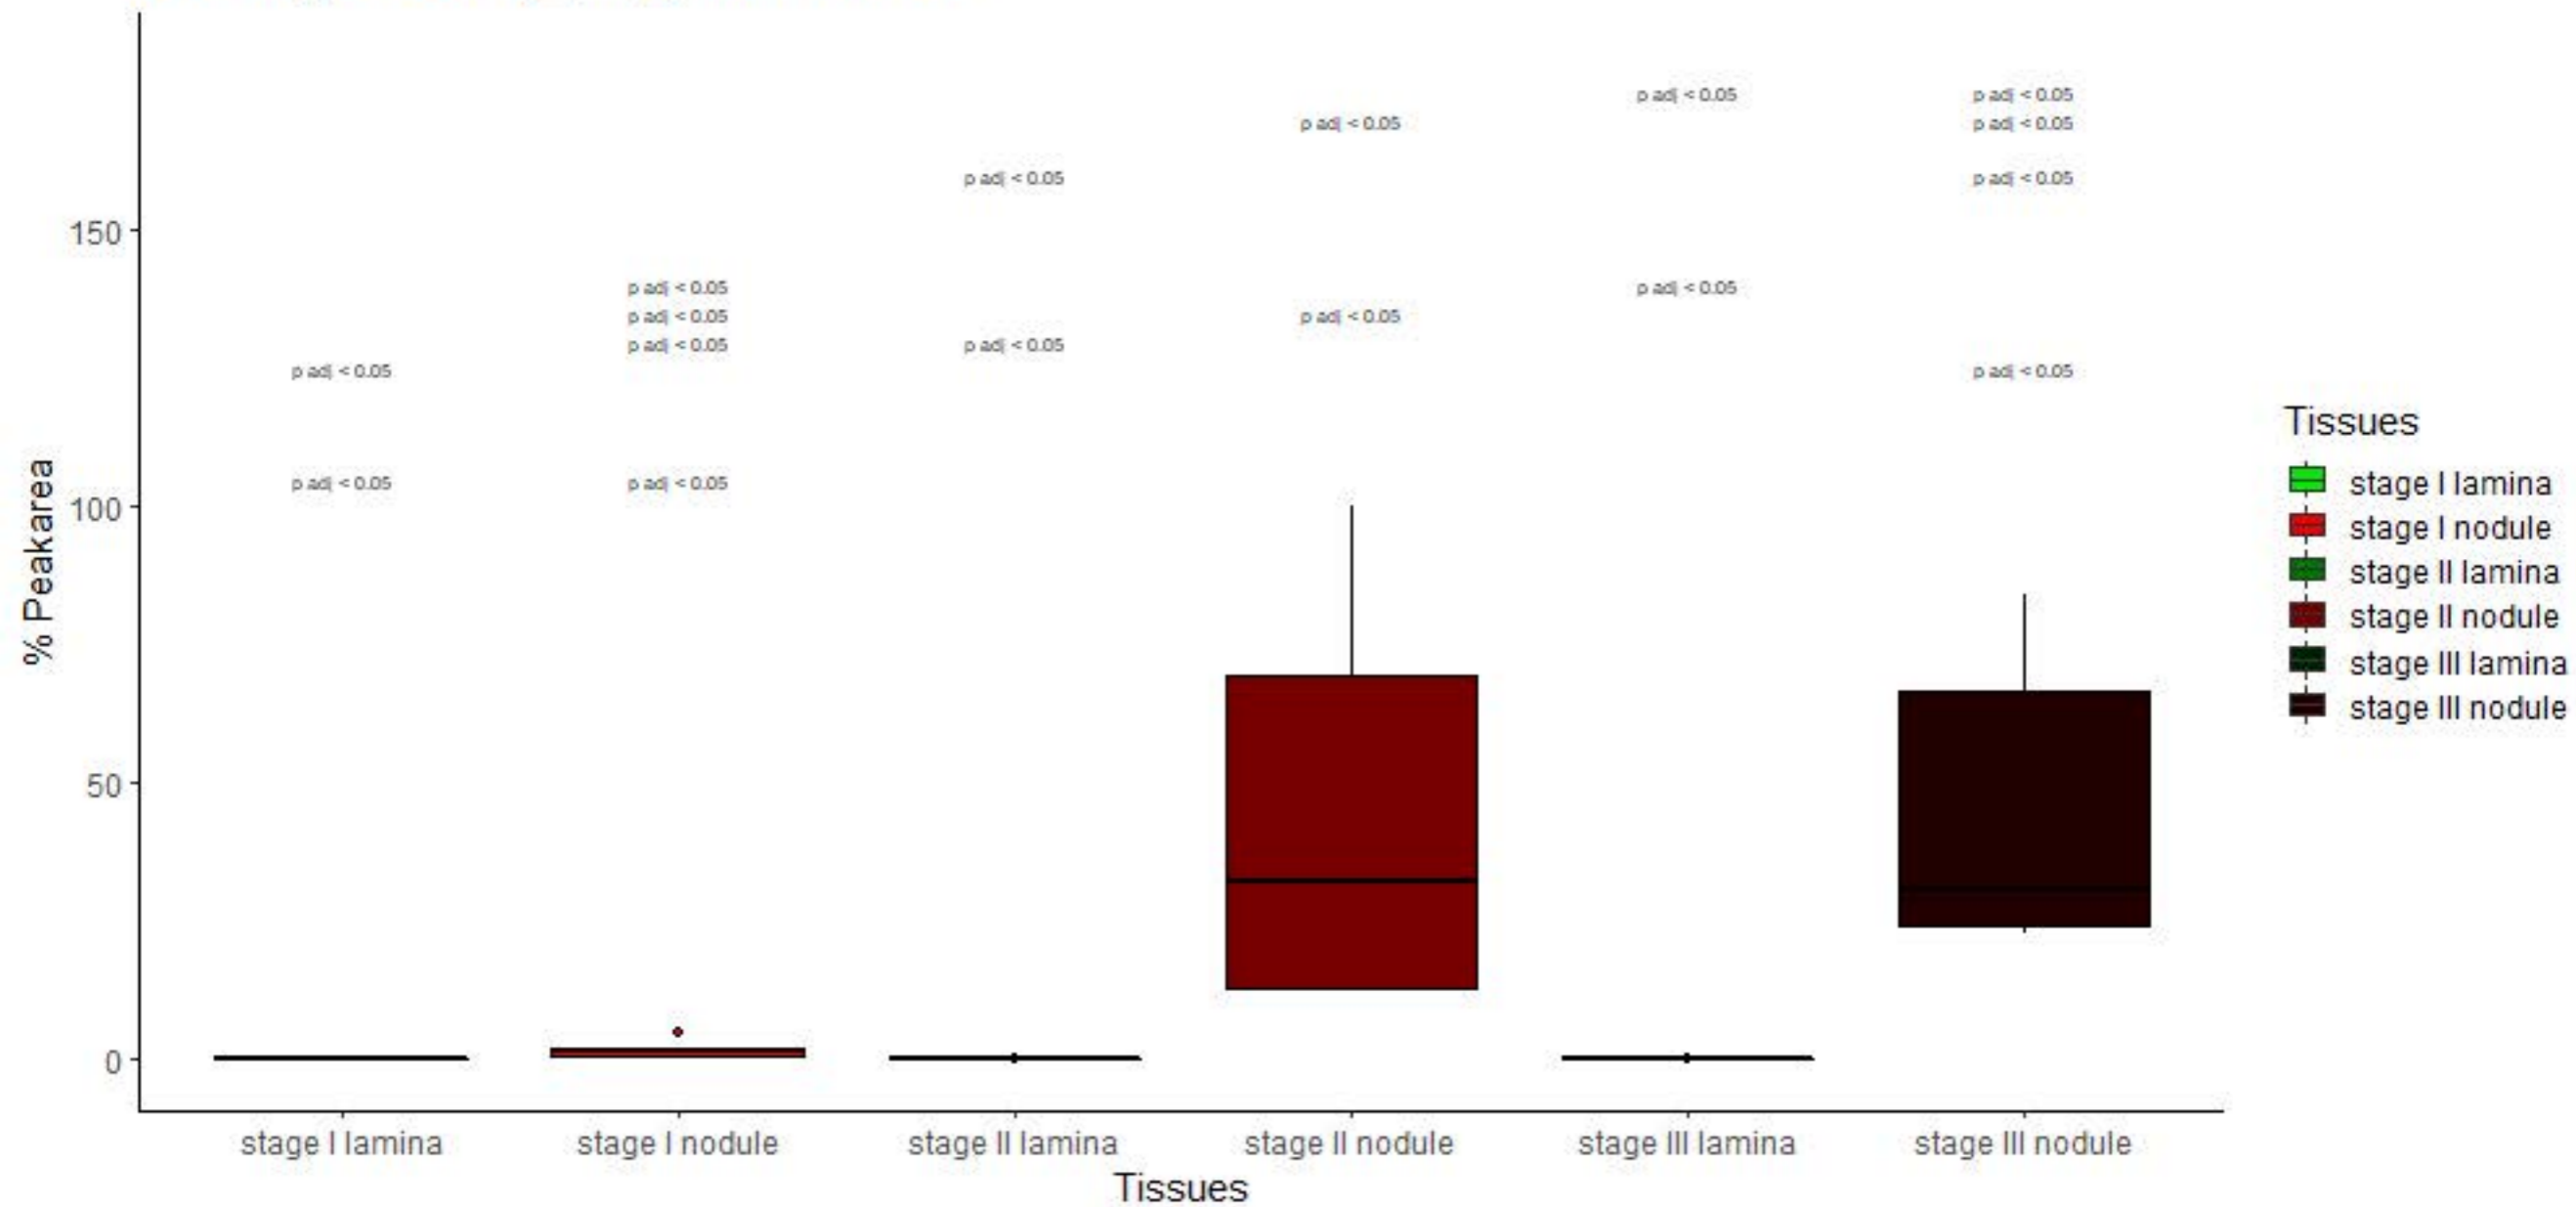

# Putative\_cyclic-depsipeptide\_RT:35.12\_min\_m/z:1123.5715

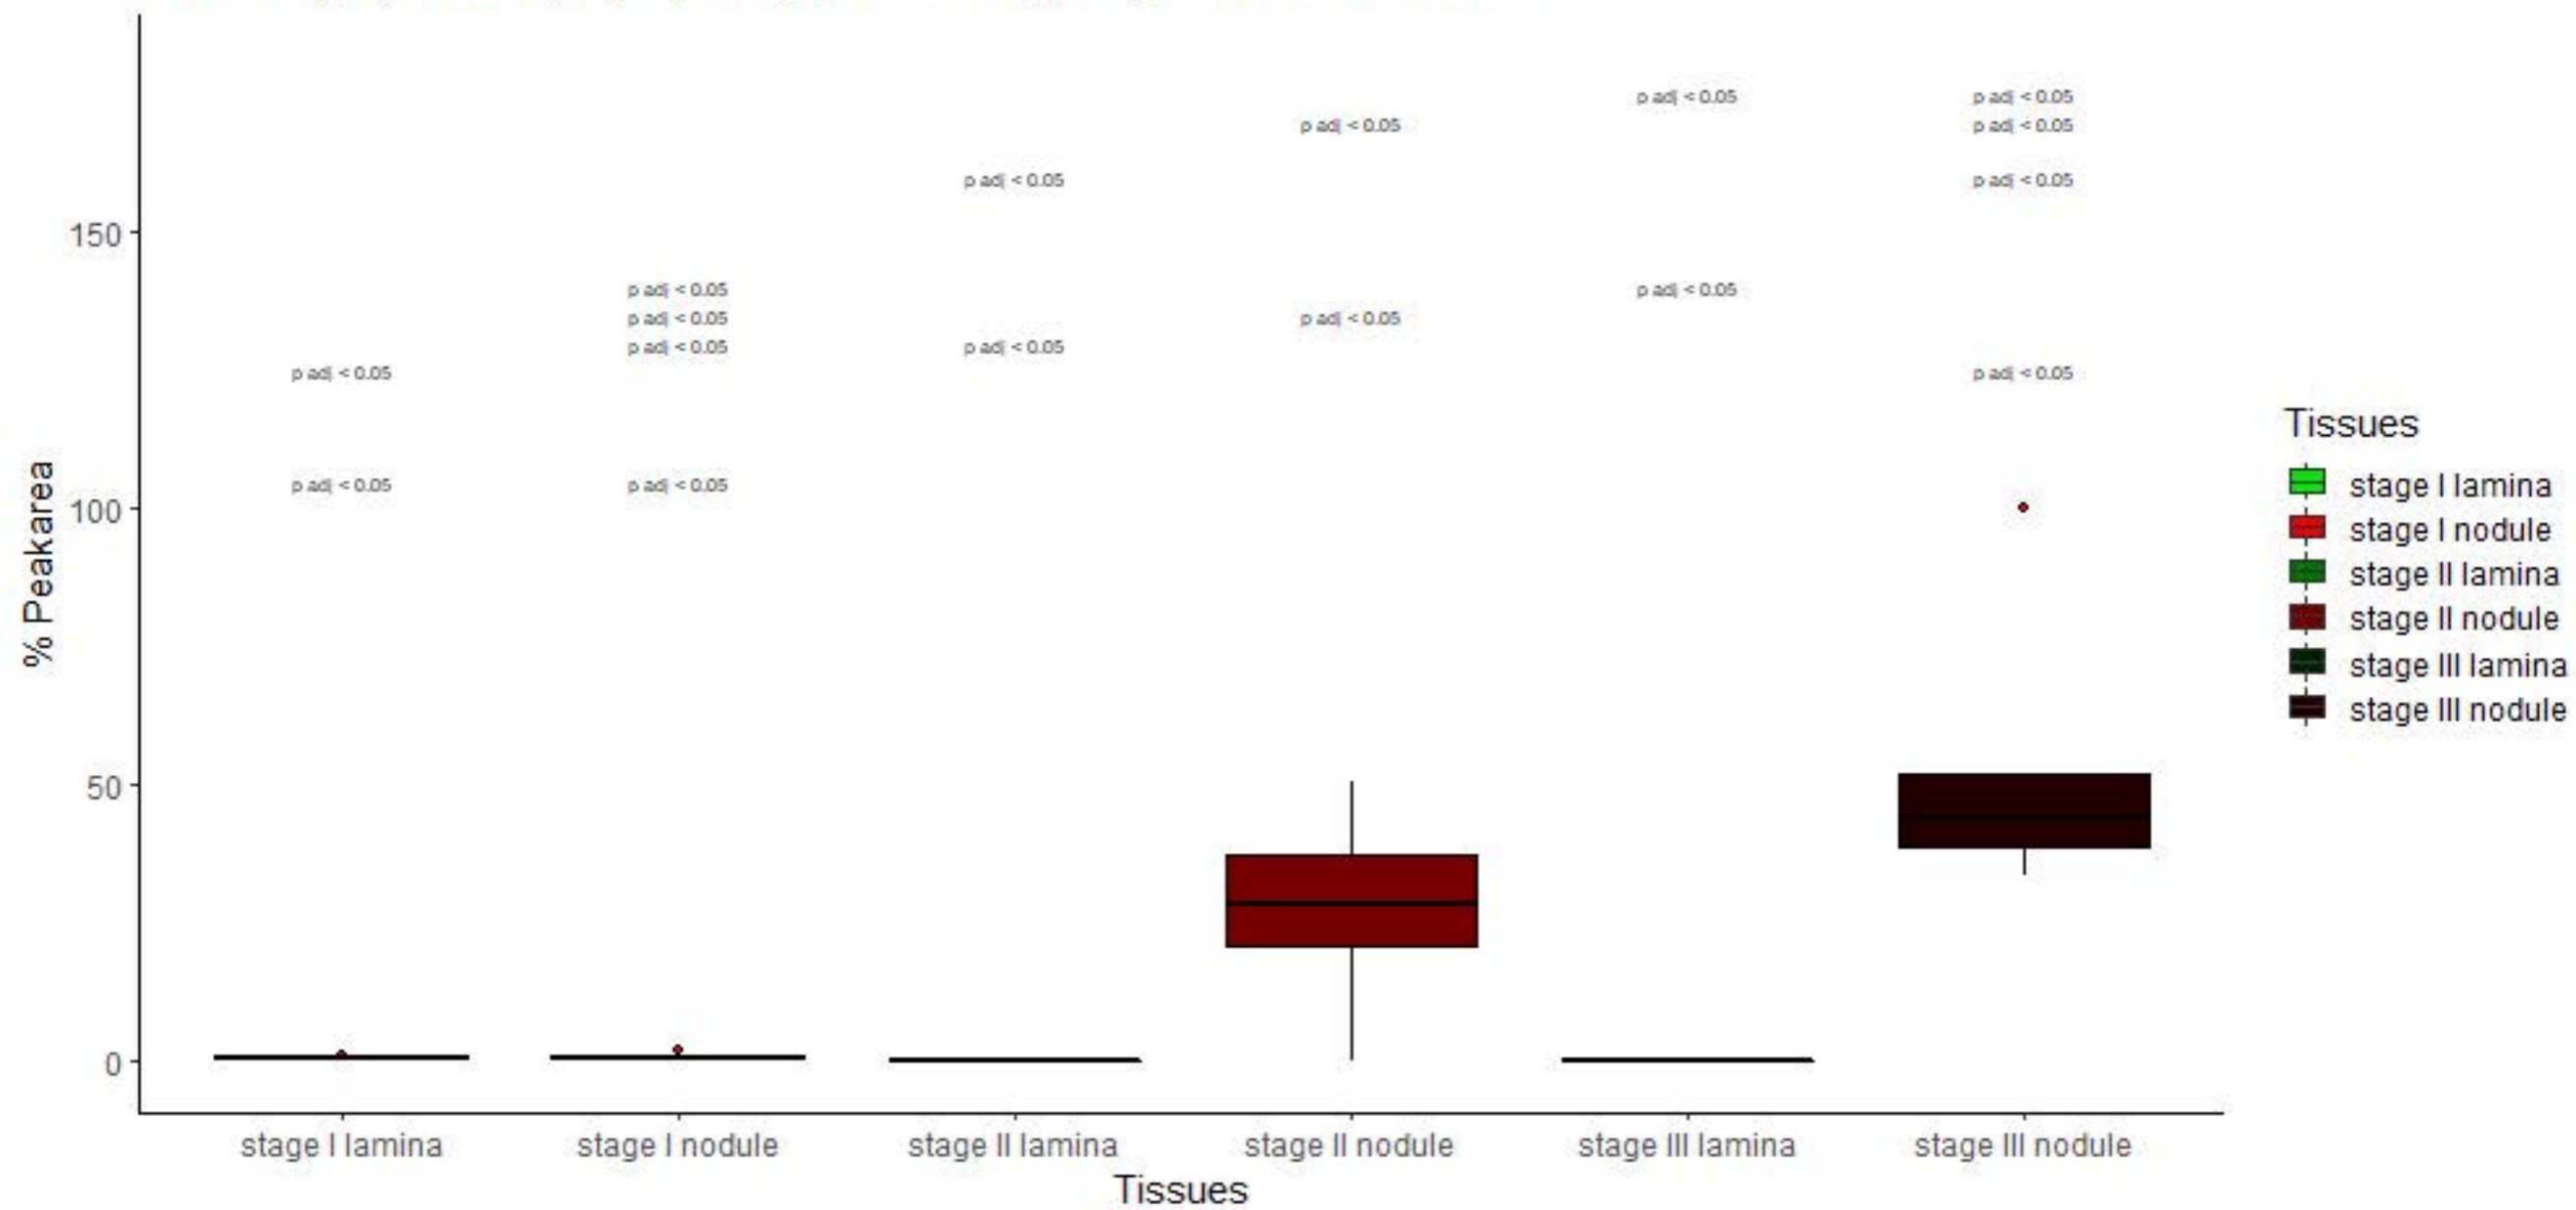

# Putative\_cyclic-depsipeptide\_RT:37.36\_min\_m/z:1123.5723

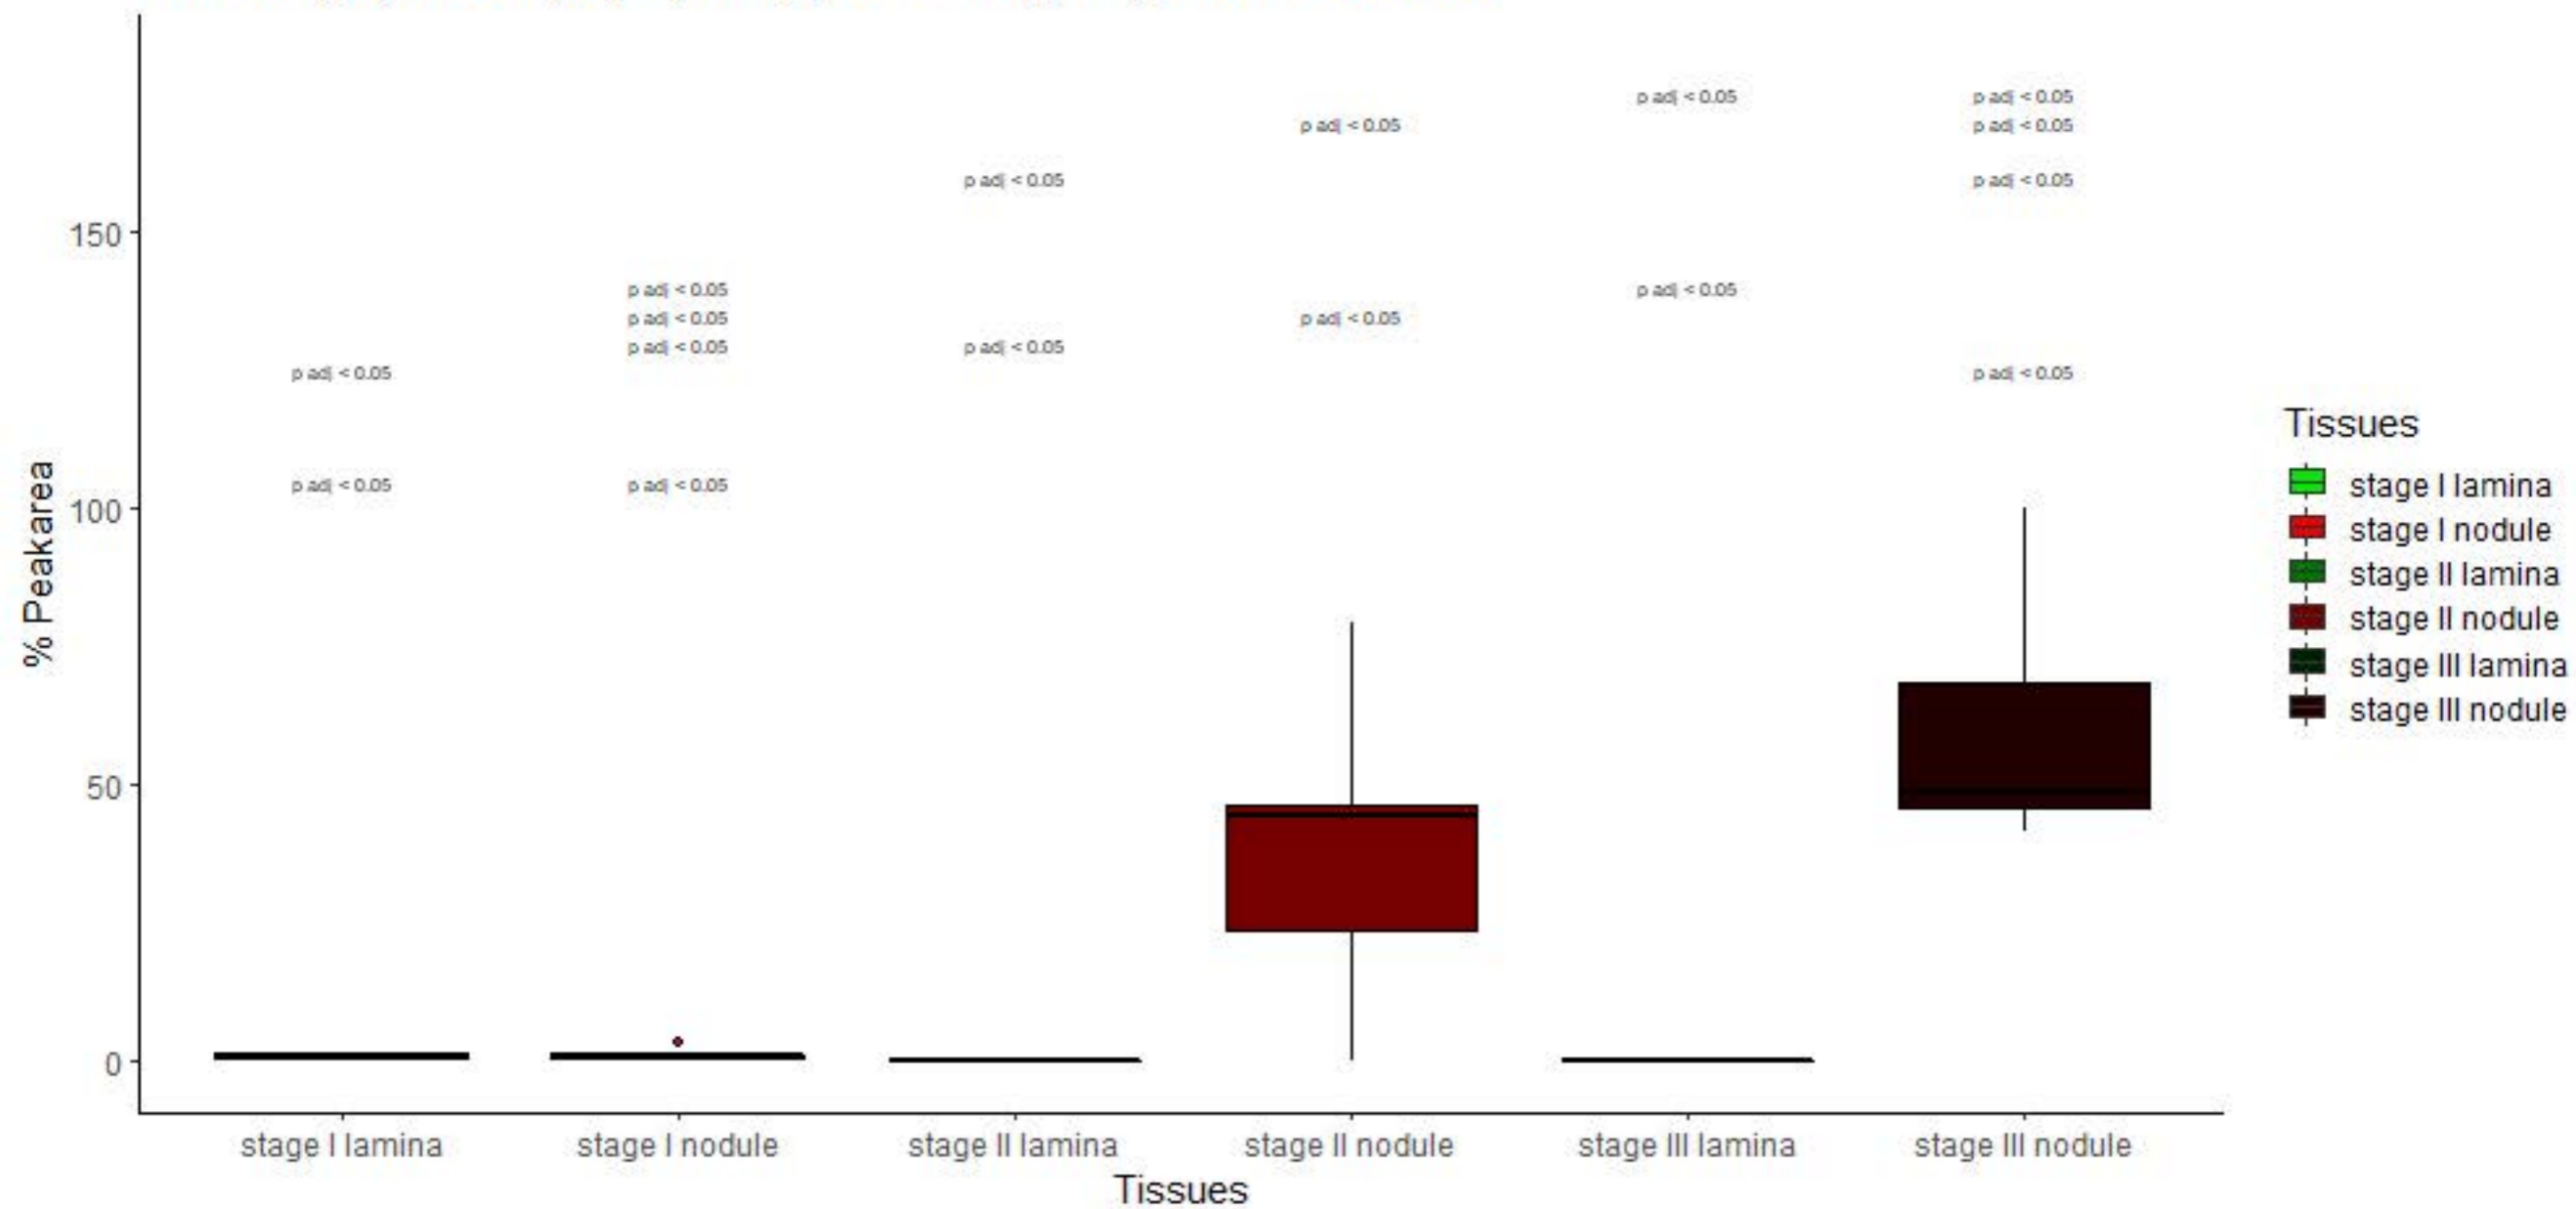



# Putative\_cyclic-depsipeptide\_RT:42.33\_min\_m/z:988.5237

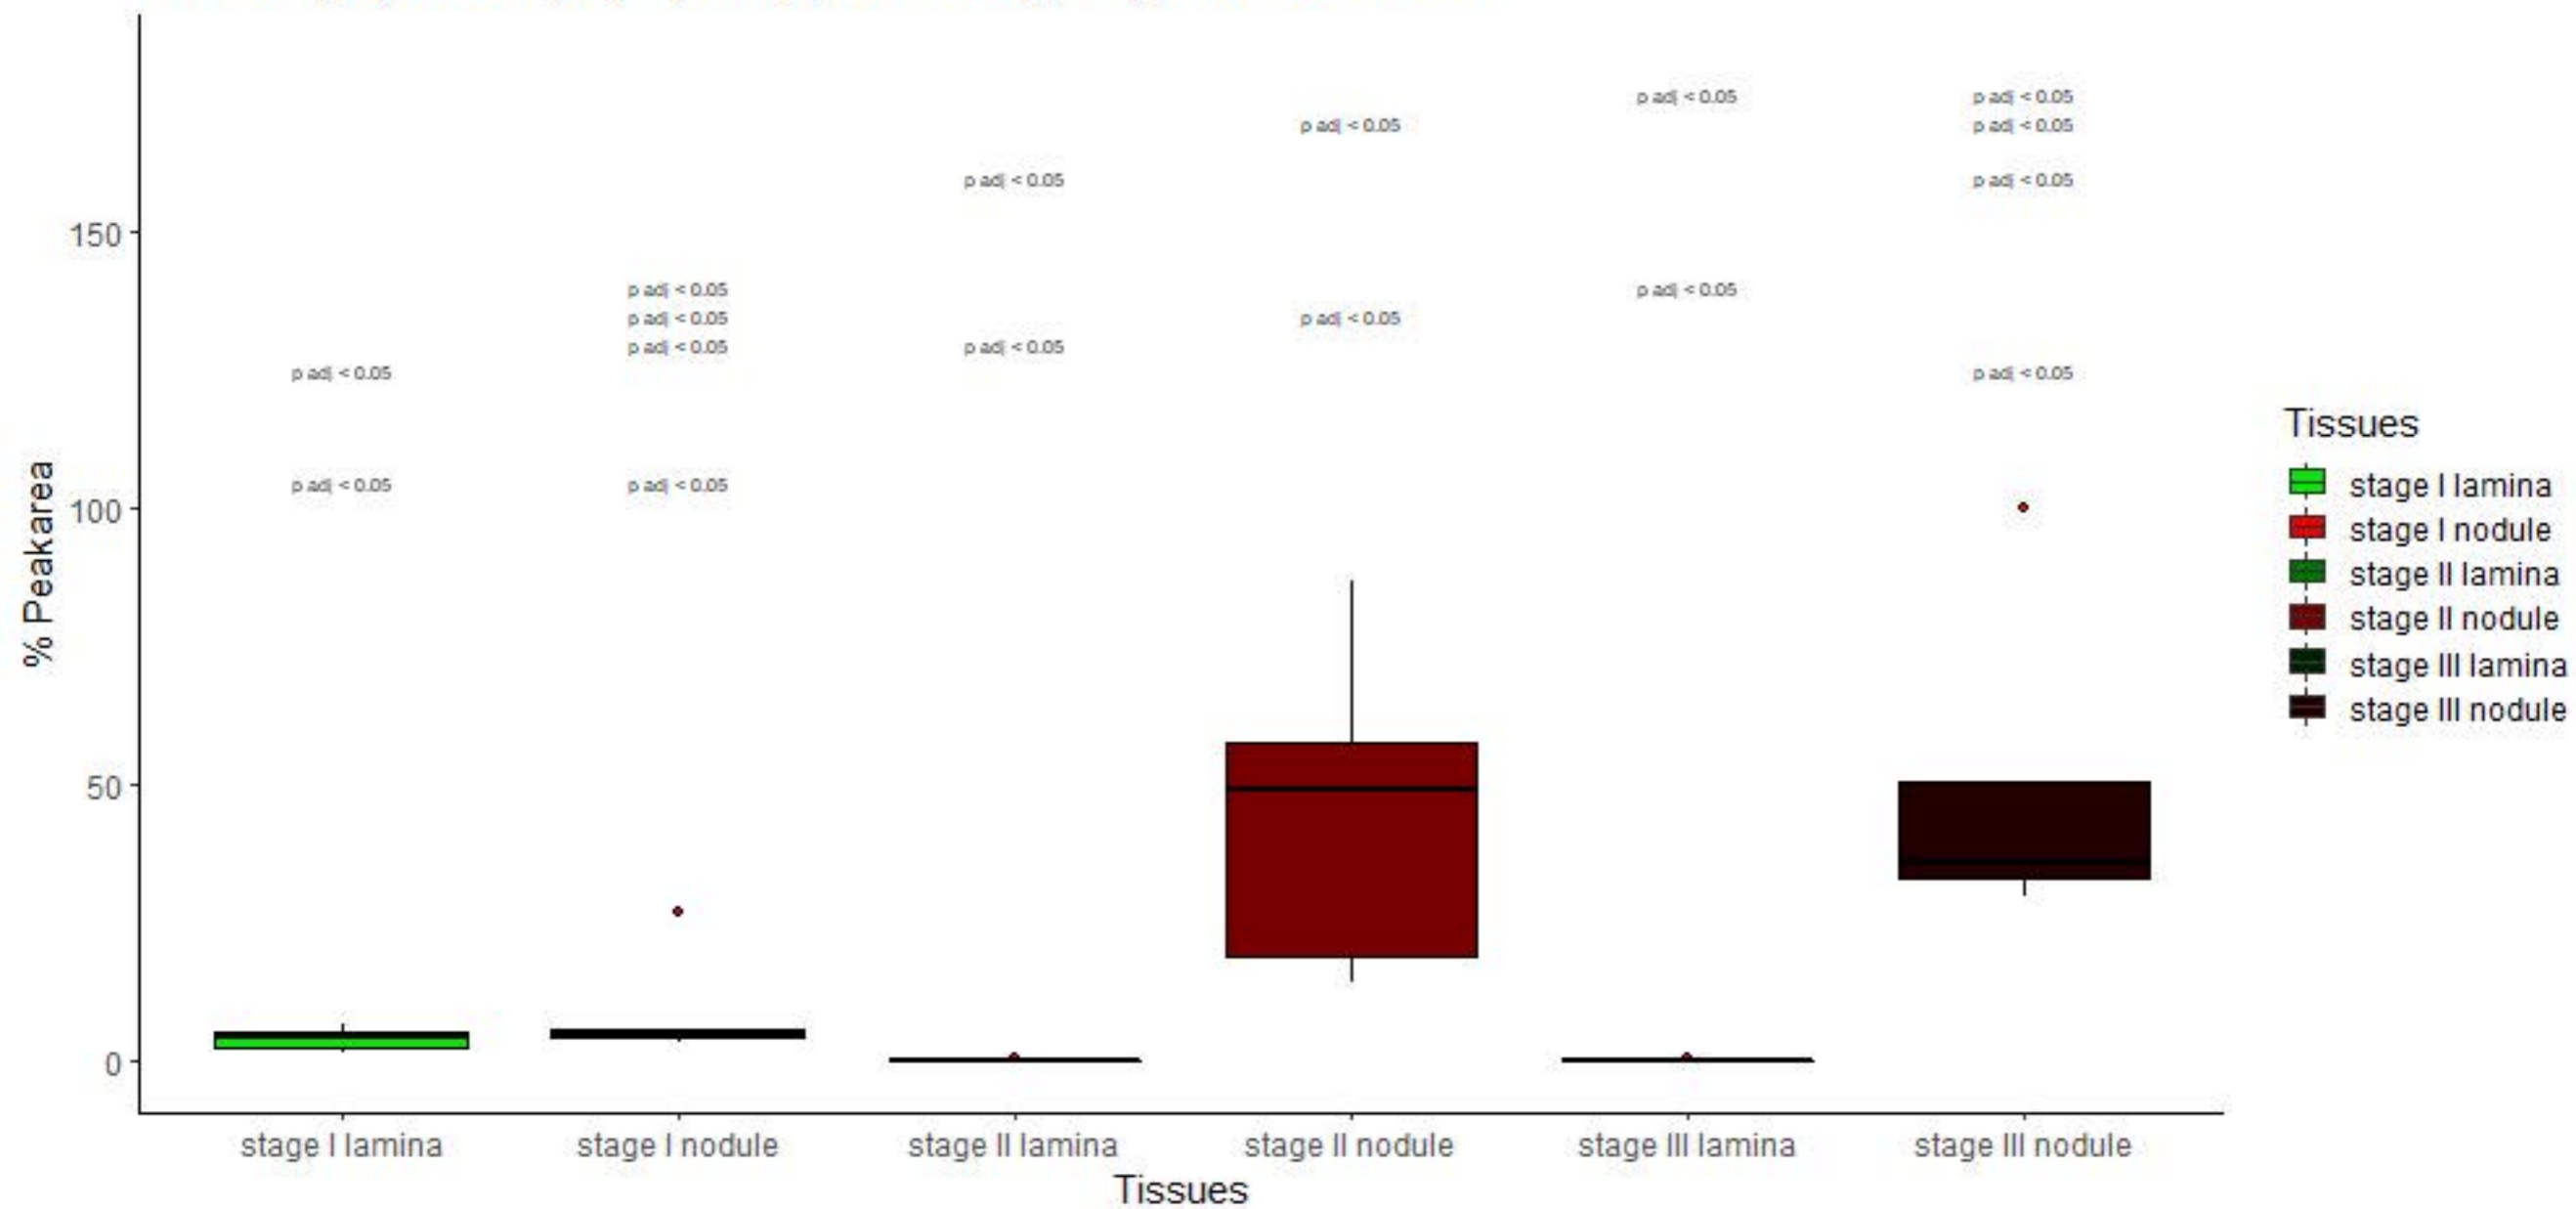

# Putative\_cyclic-depsipeptide\_RT:45.46\_min\_m/z:988.5237

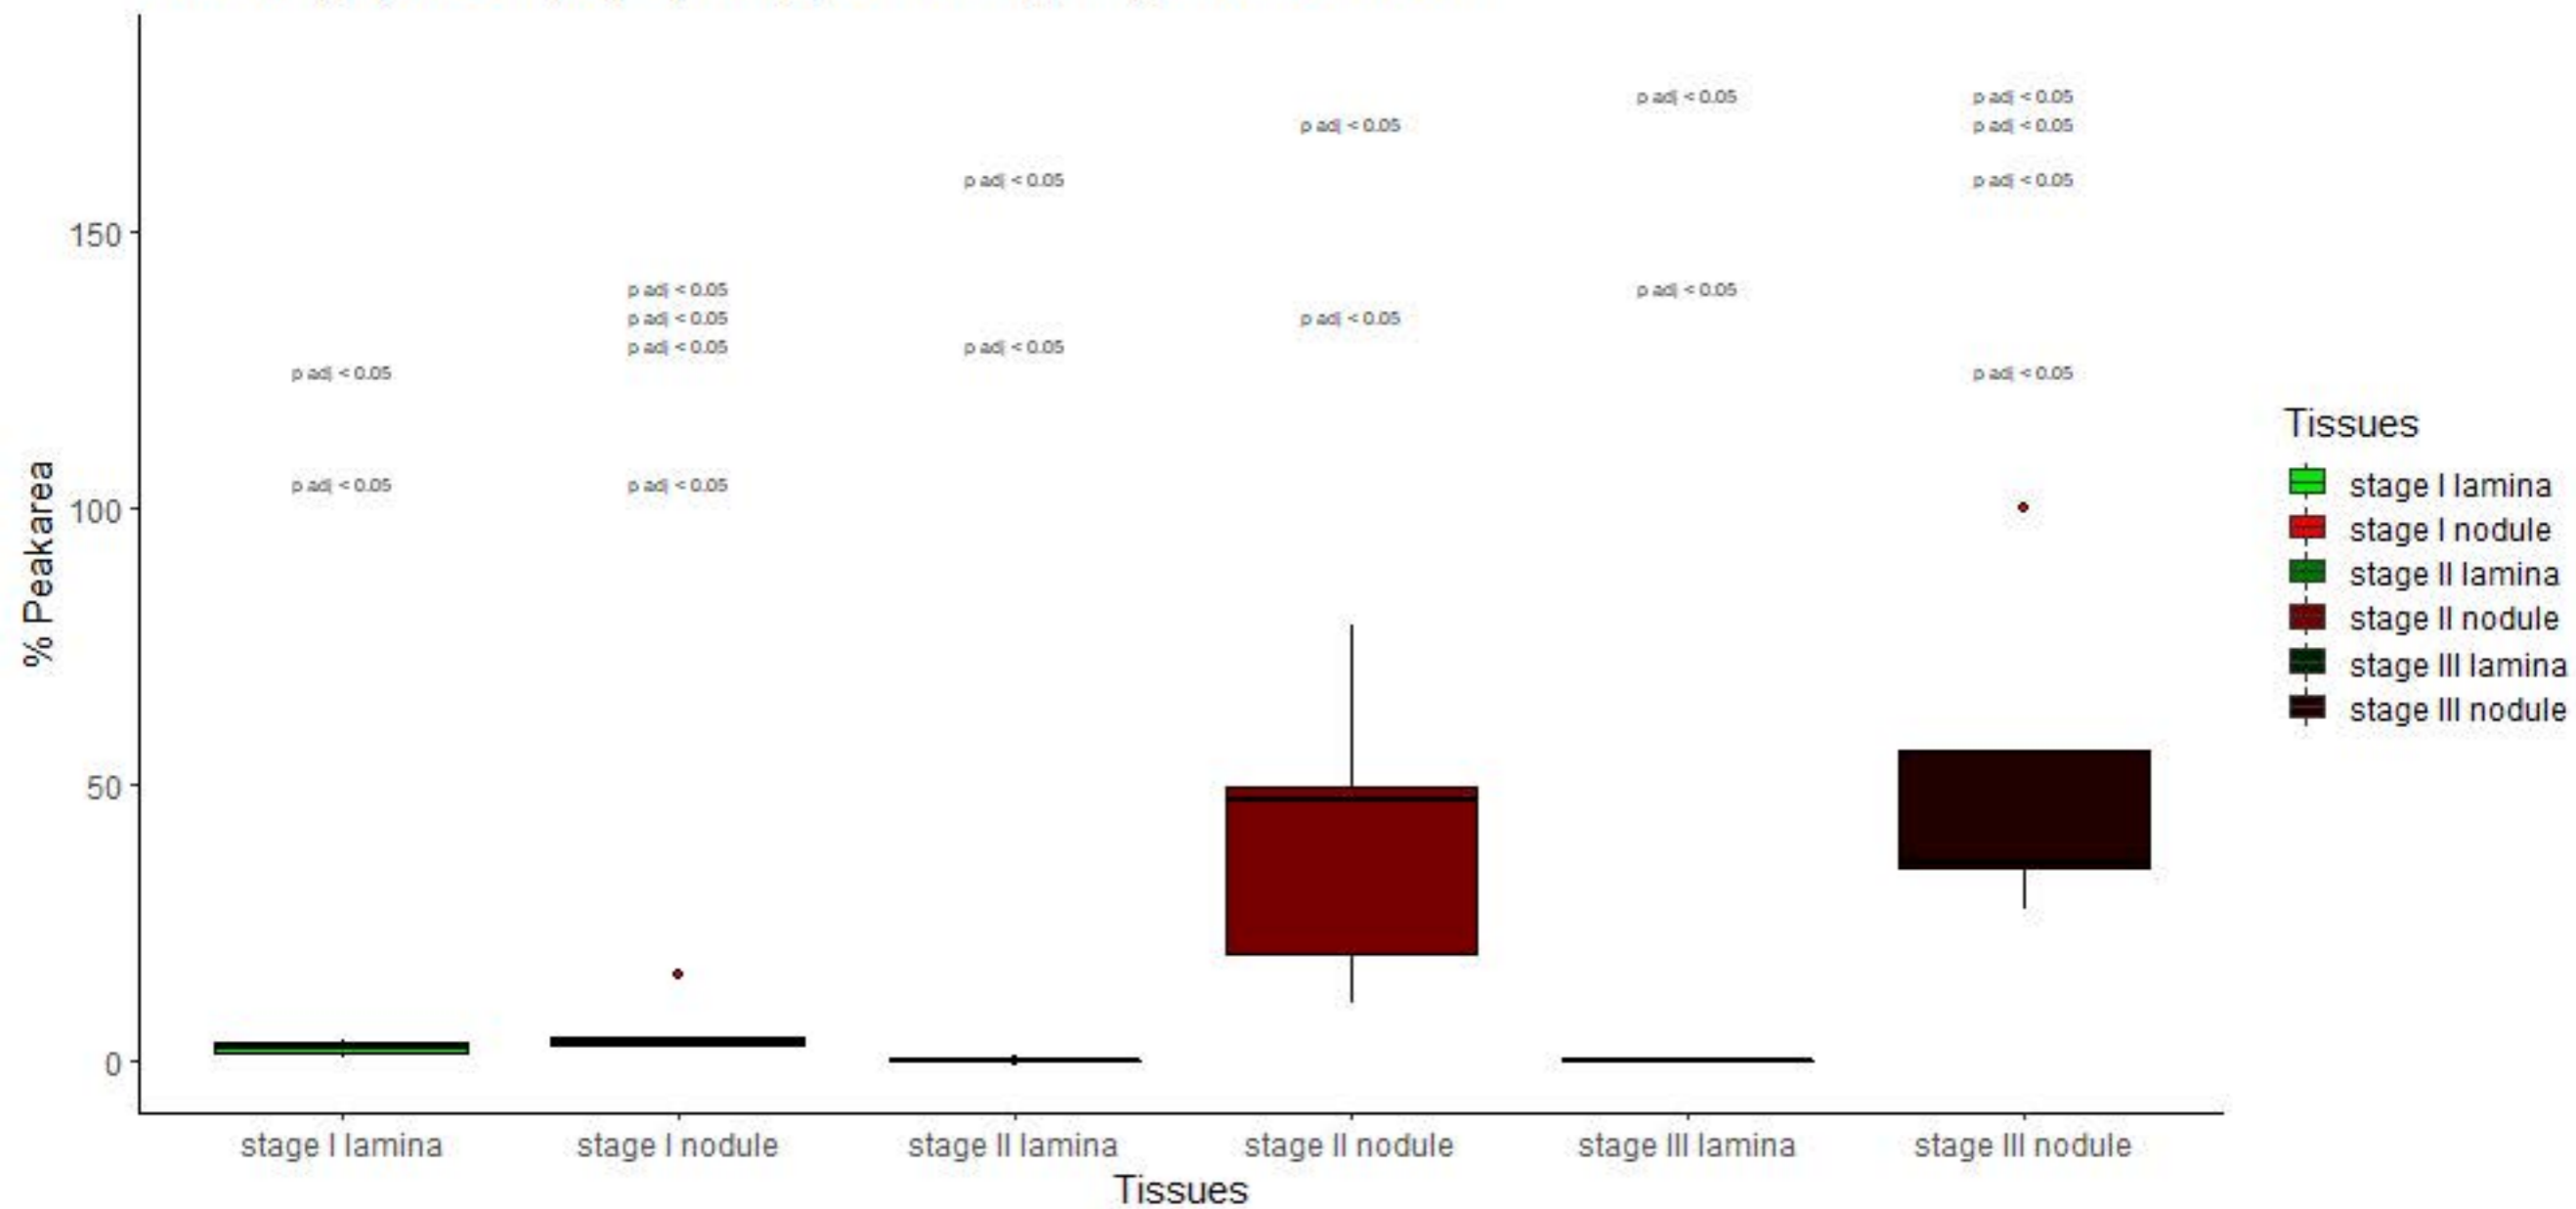

# Putative\_cyclic-depsipeptide\_RT:31.76\_min\_m/z:1123.5748

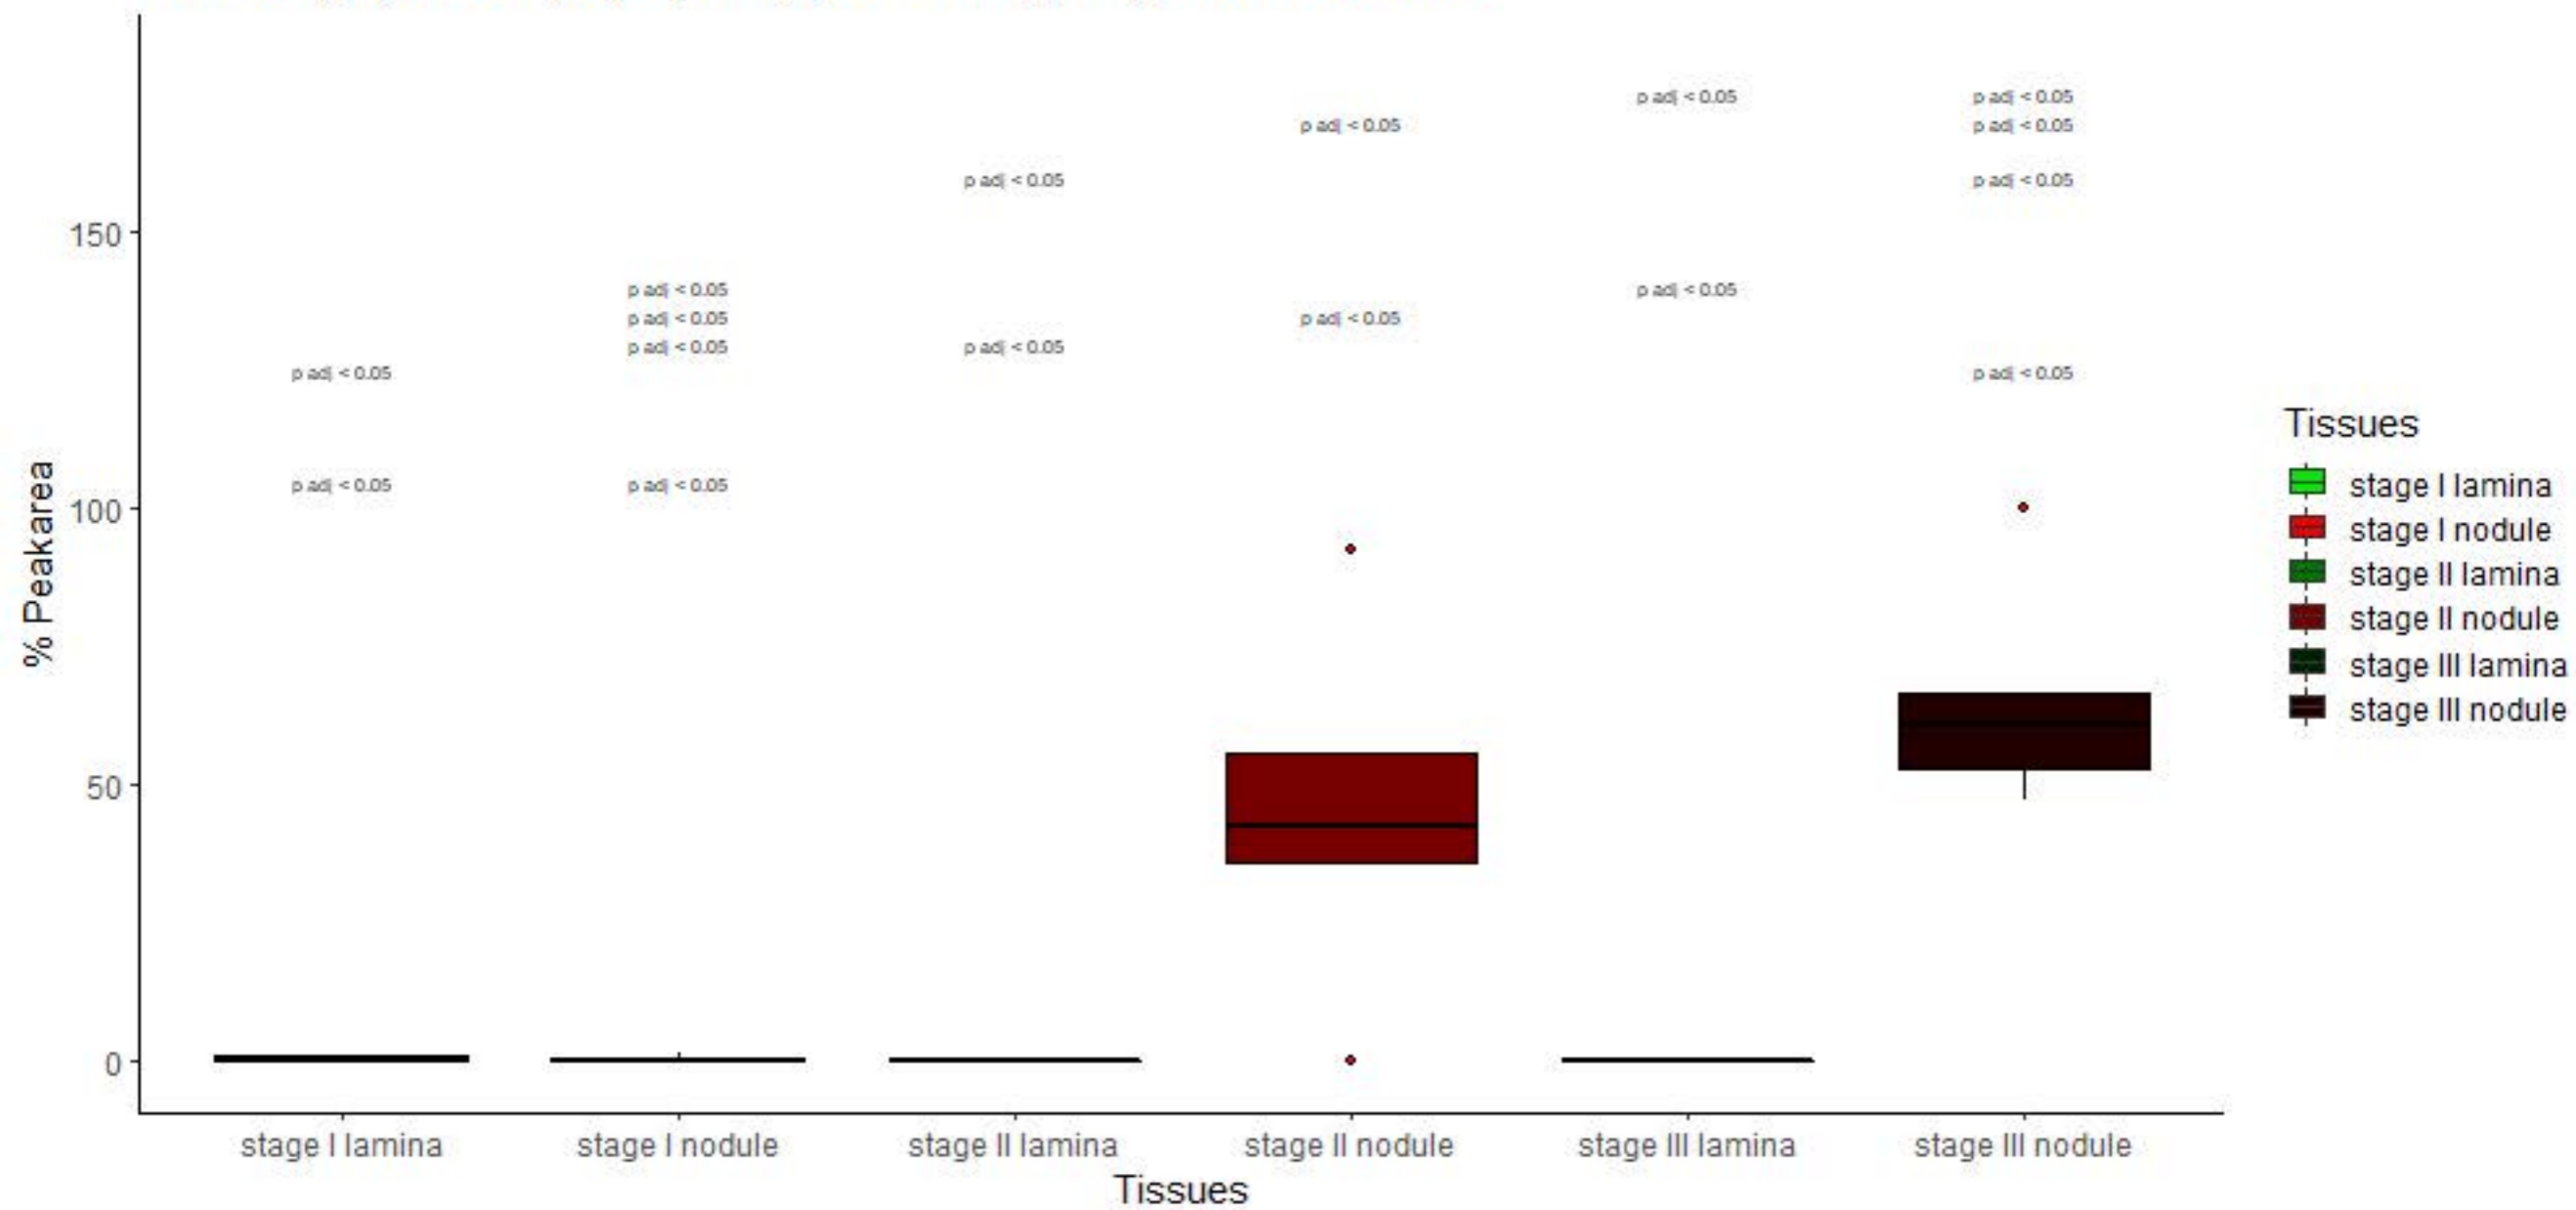

# Phosphoric acid

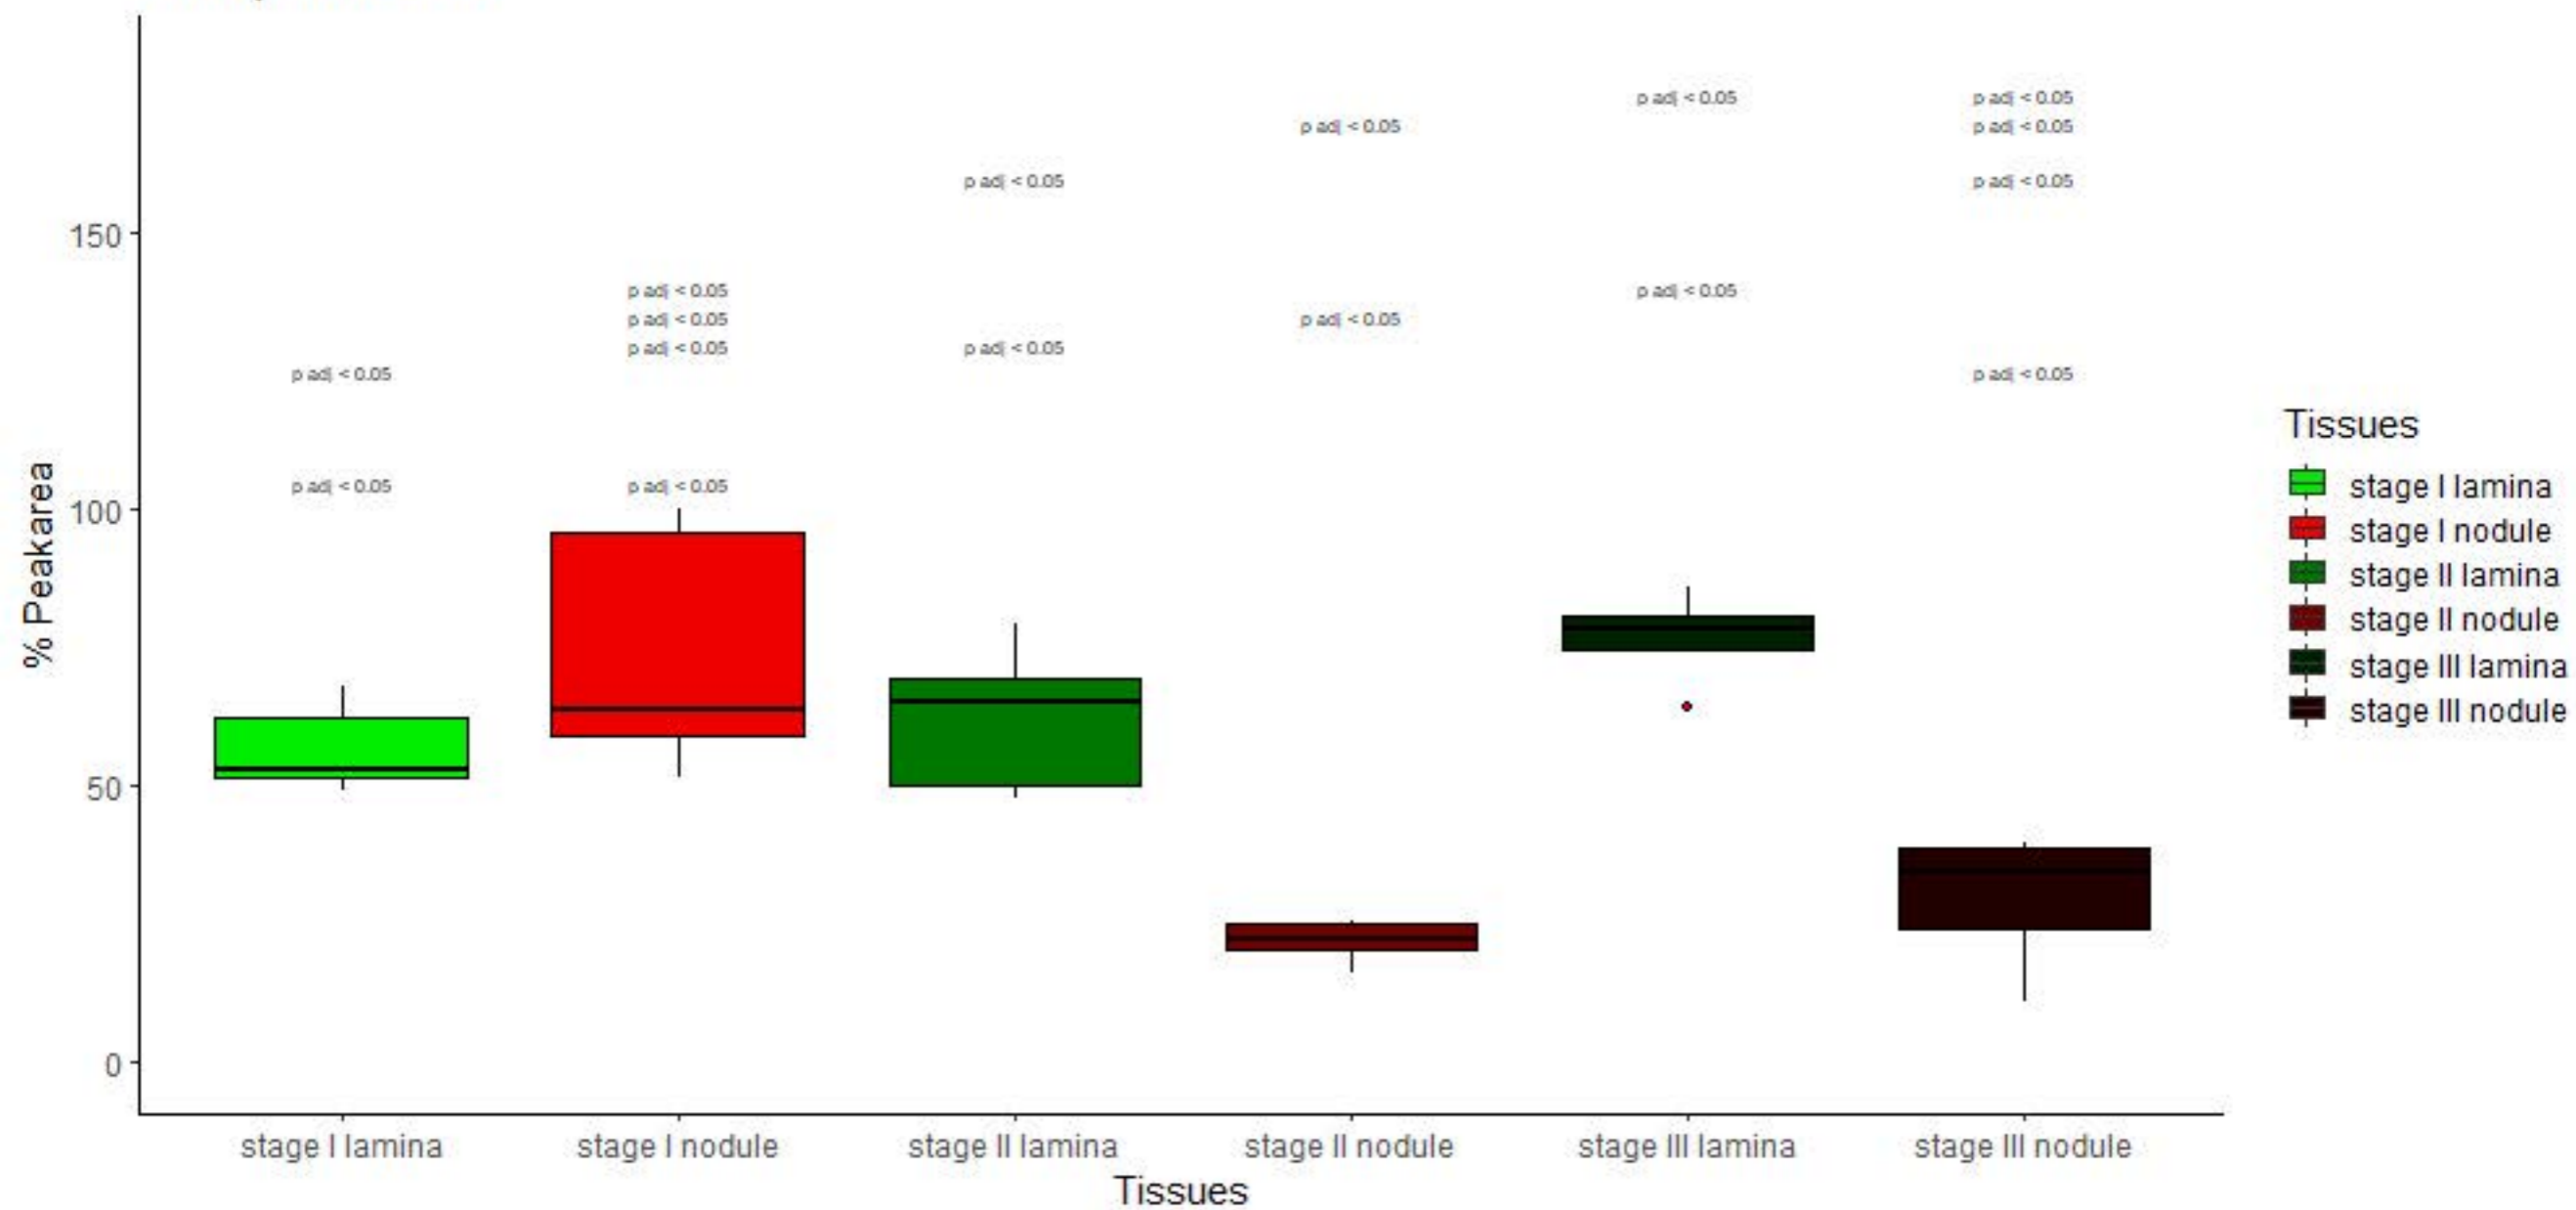

# Malonic acid

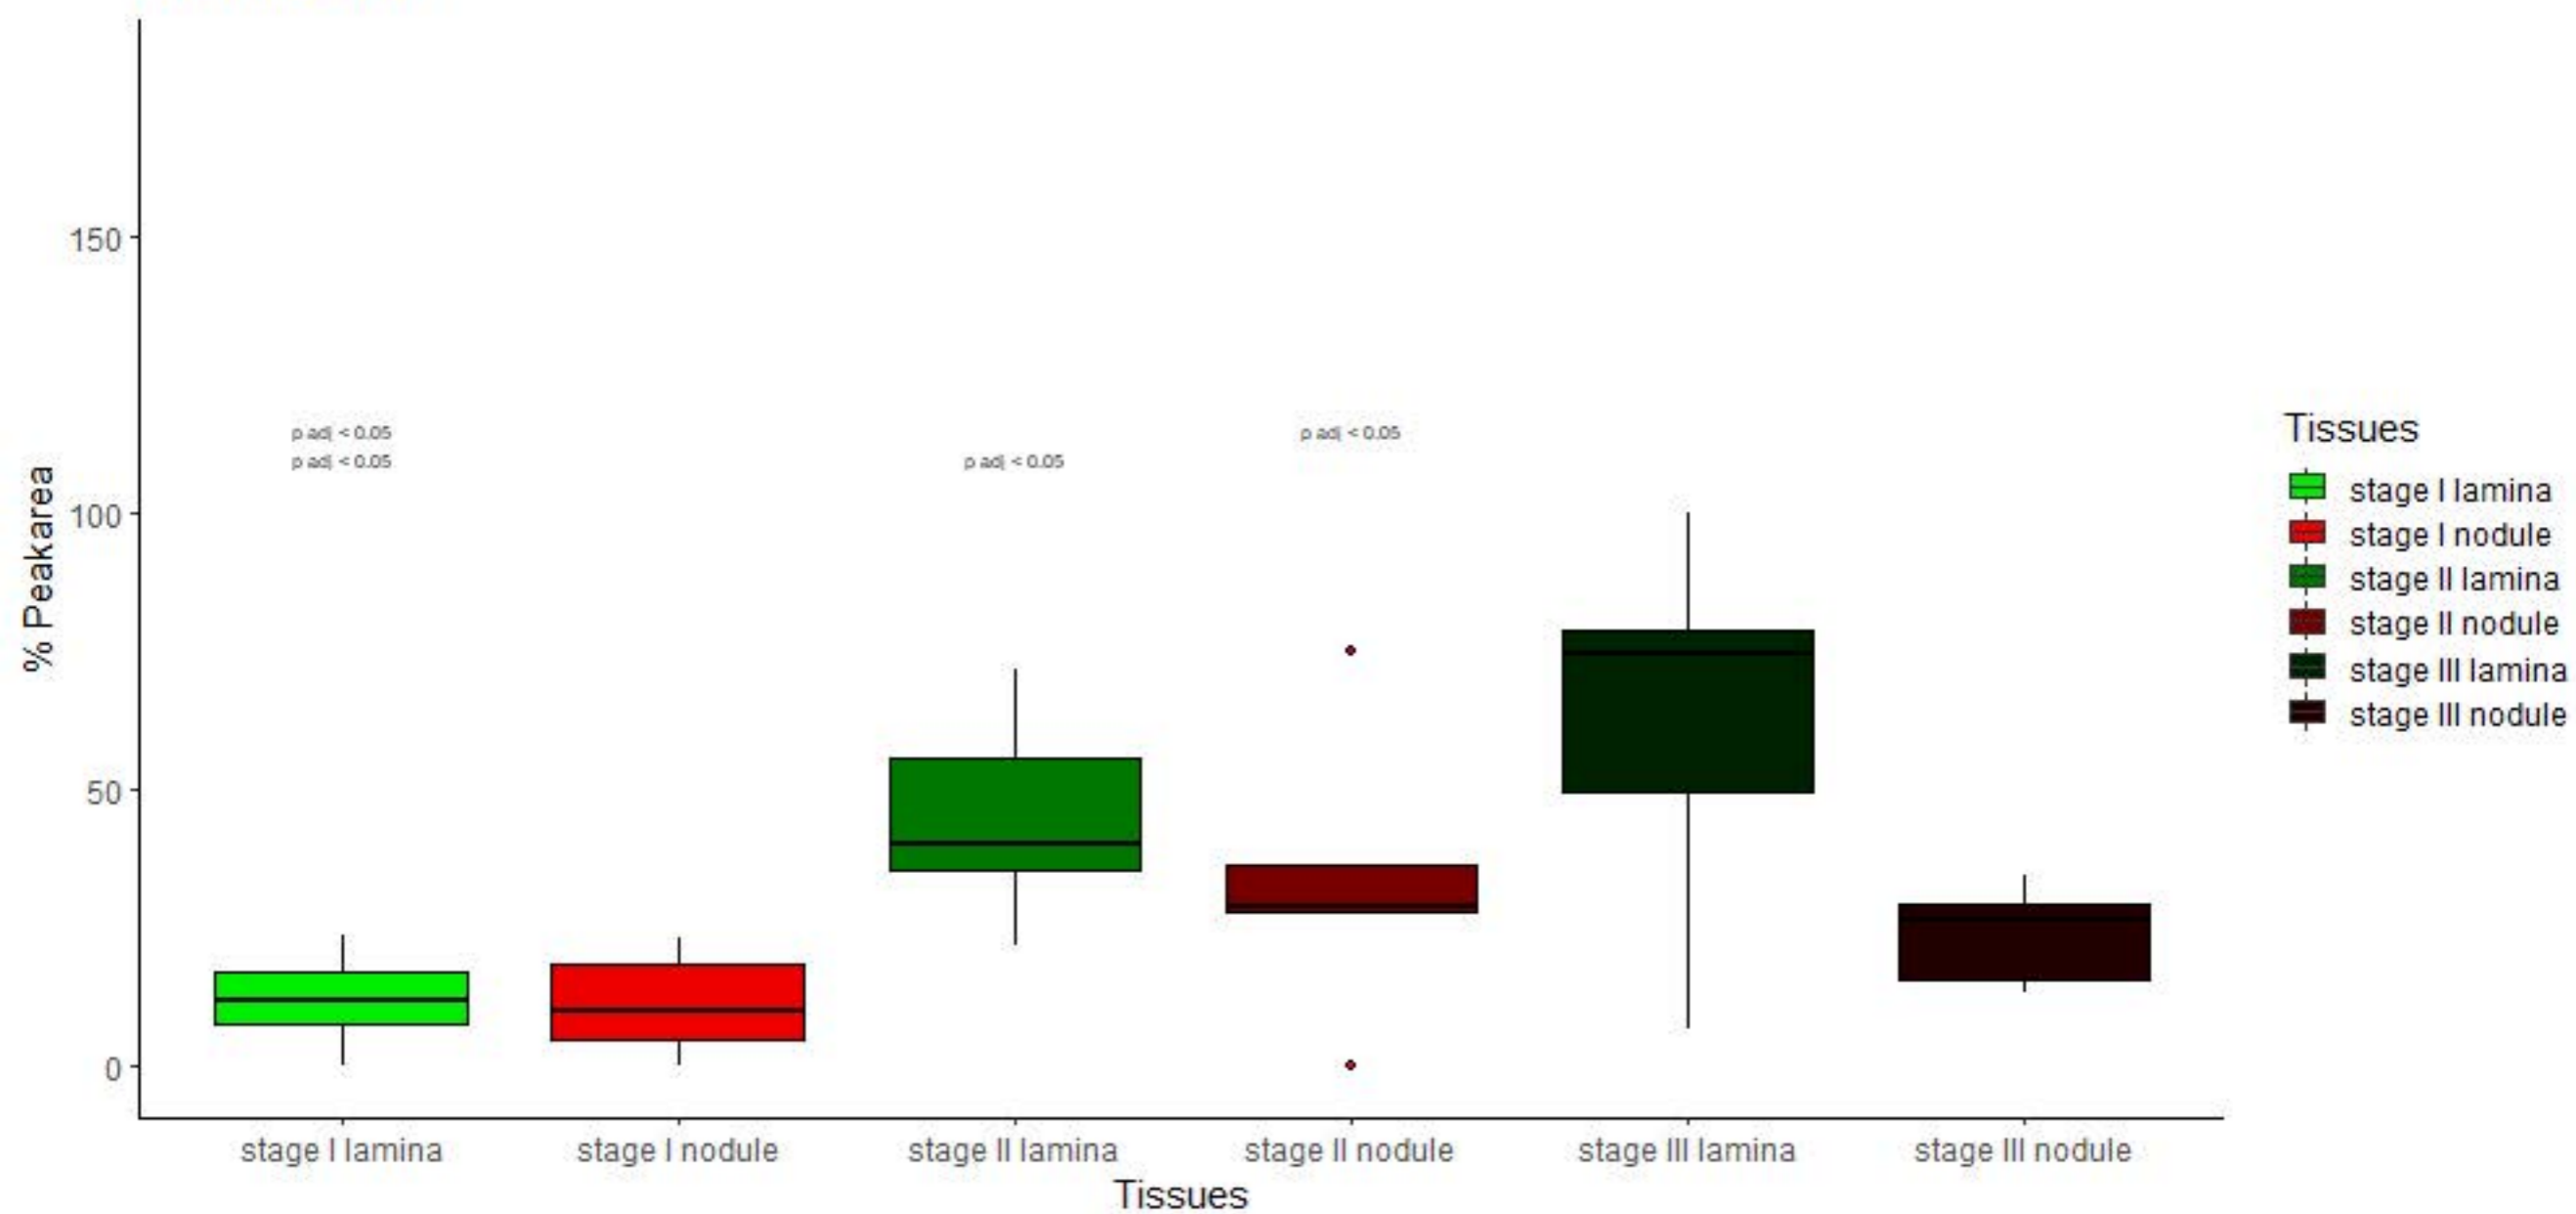

# Hexaric acid 1

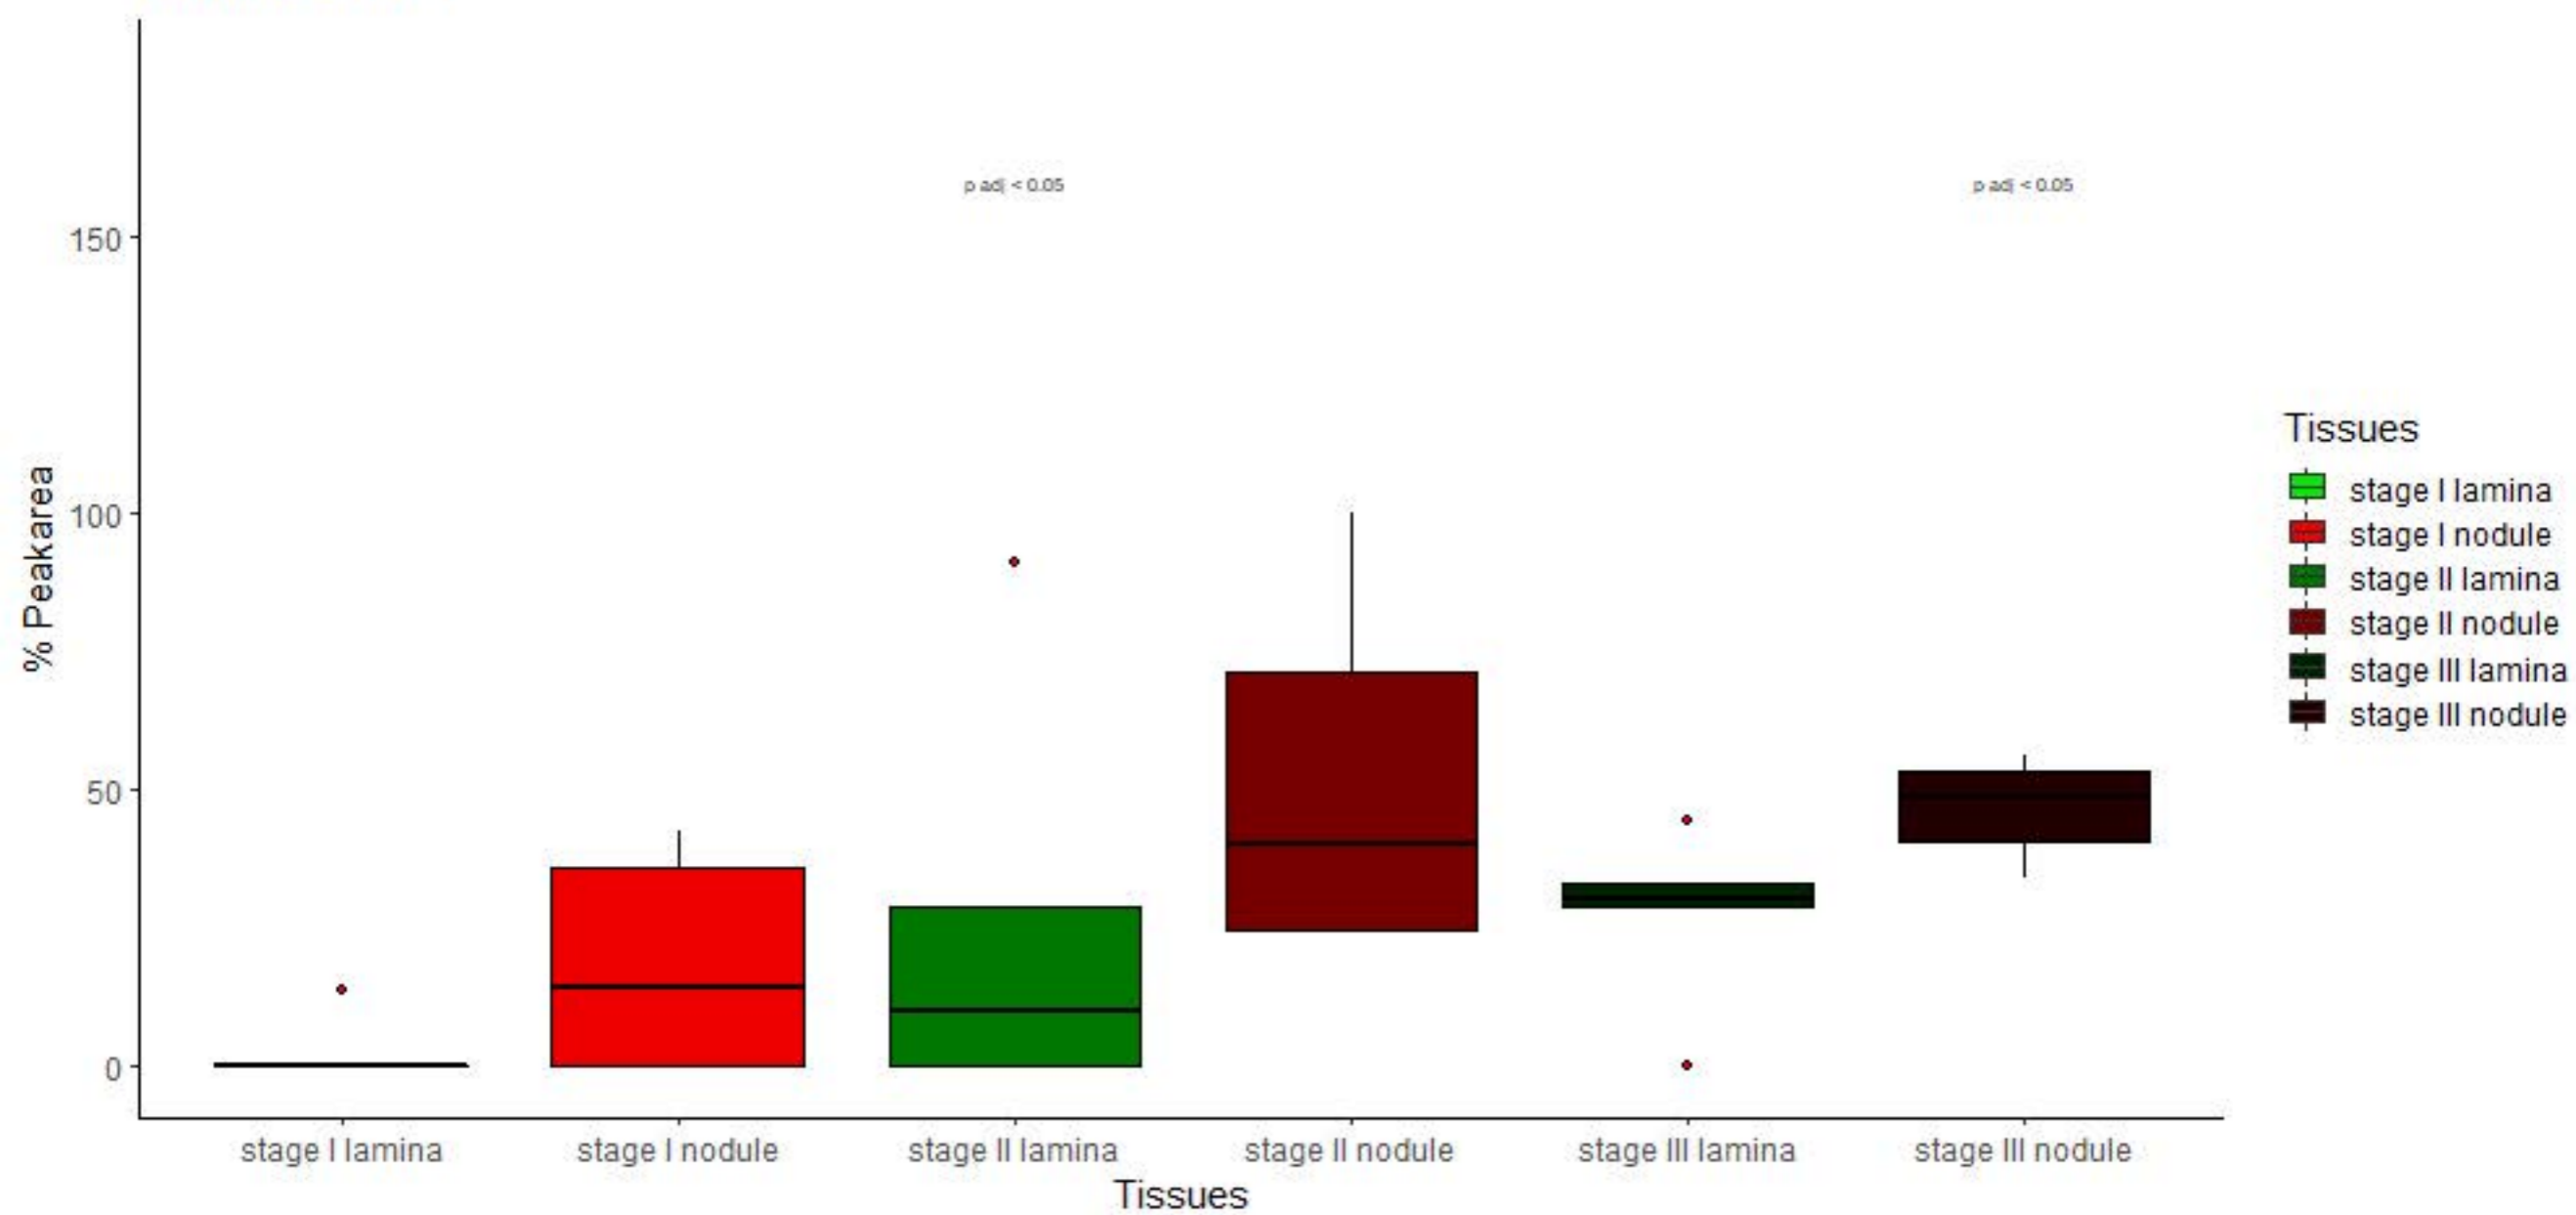

# Hexaric acid 2

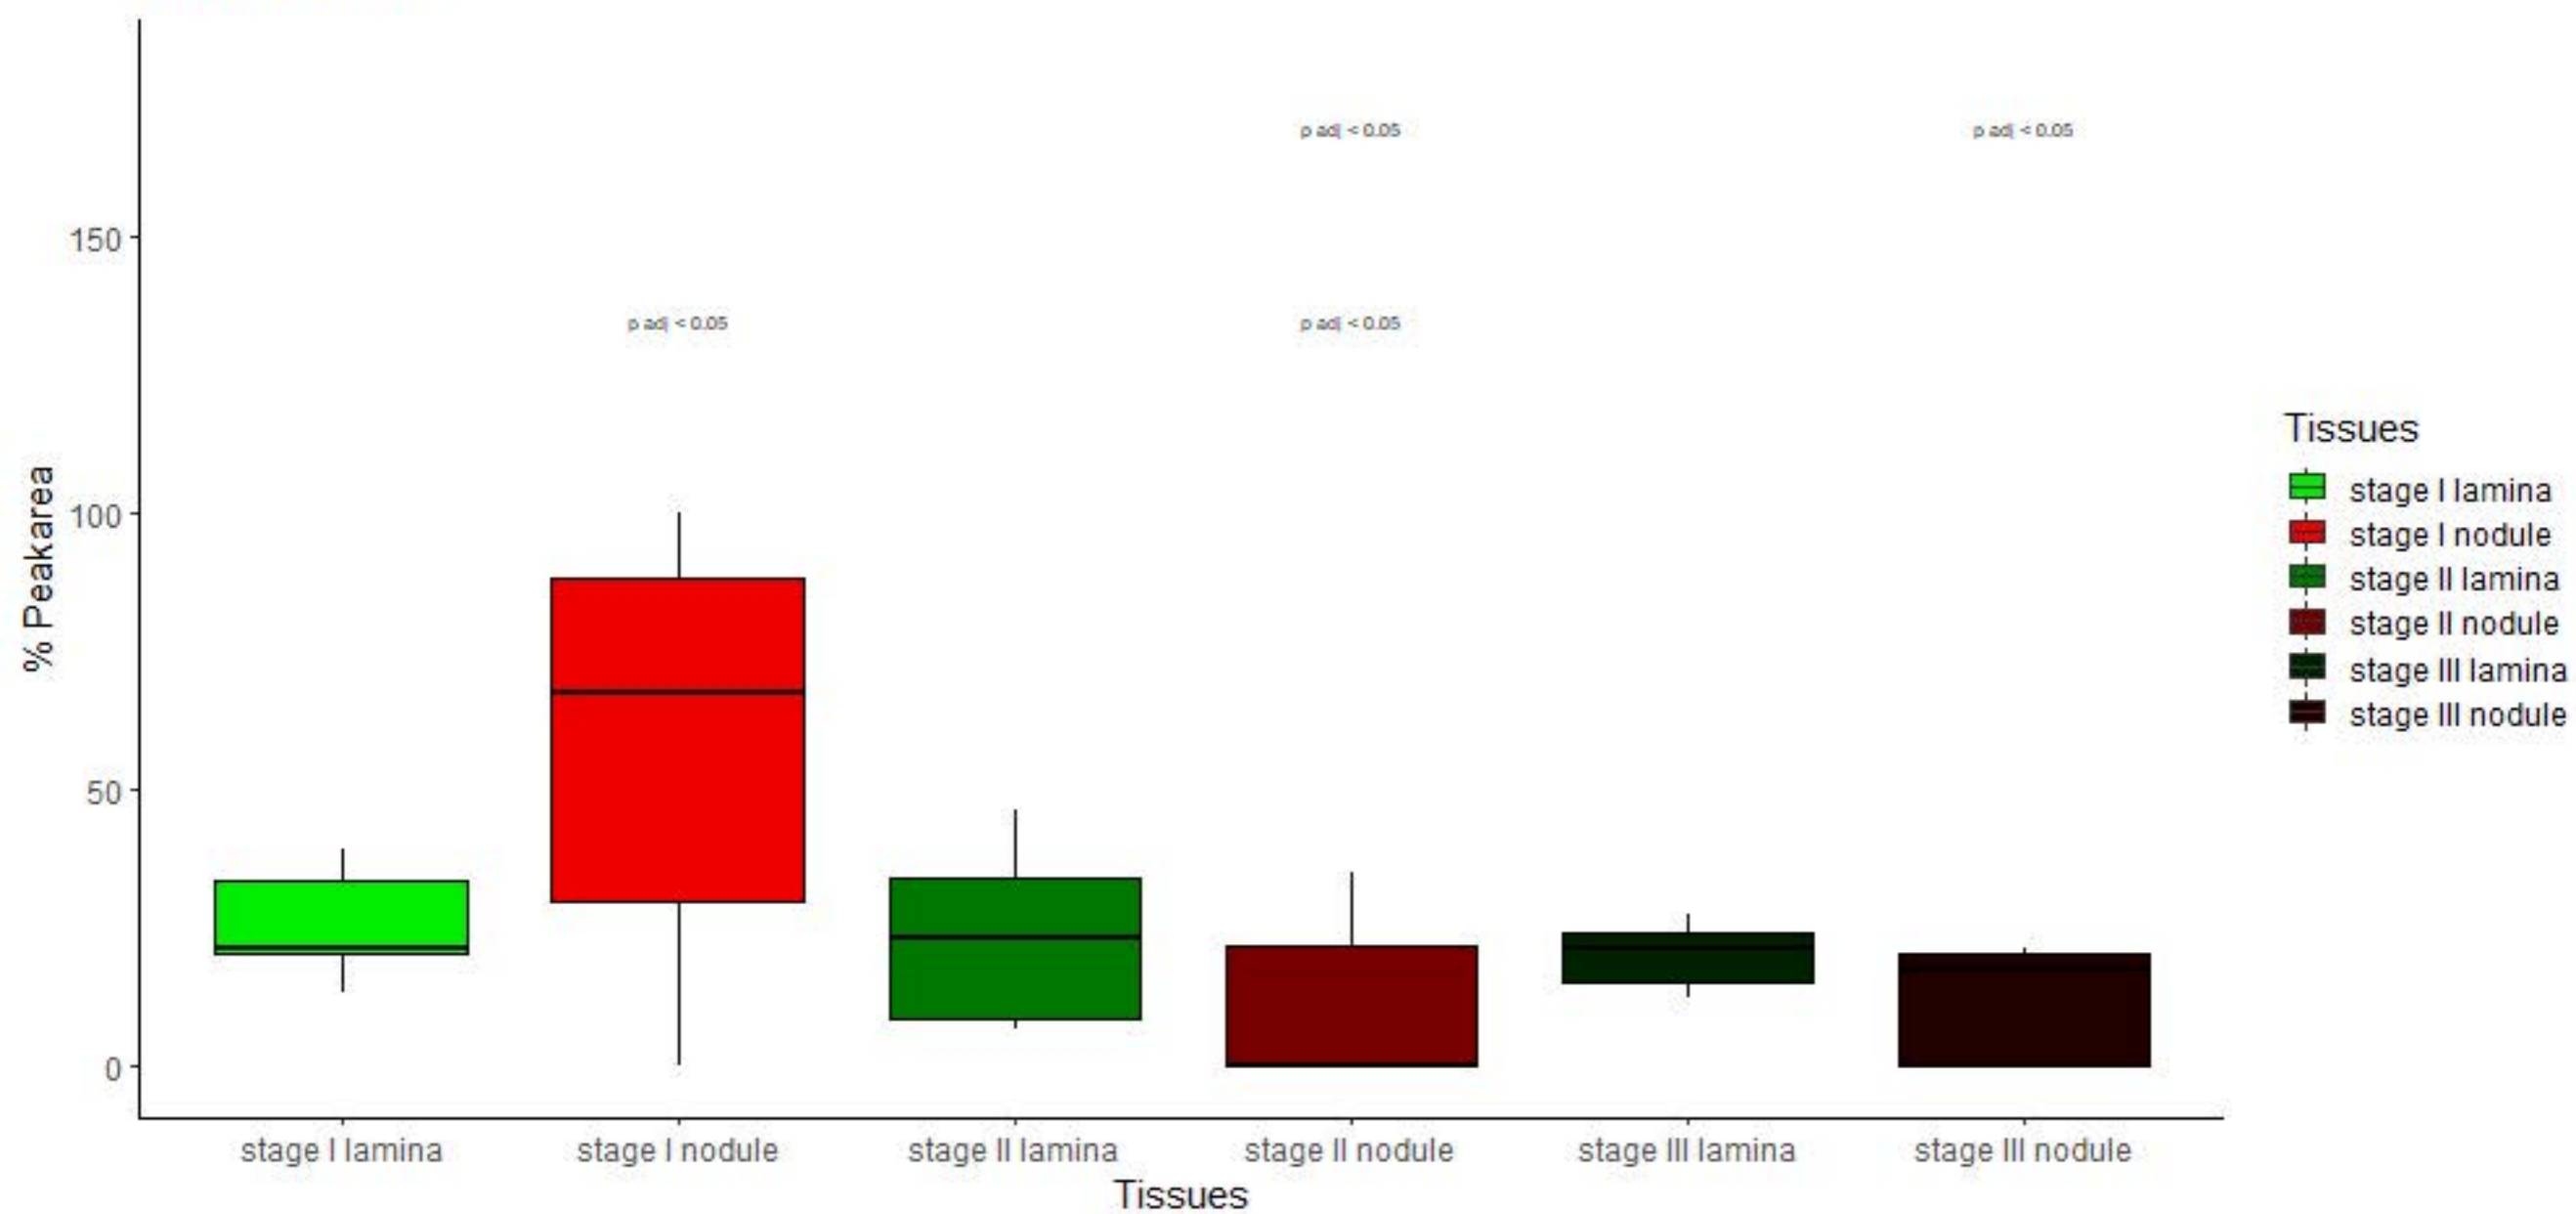

# Succinic acid

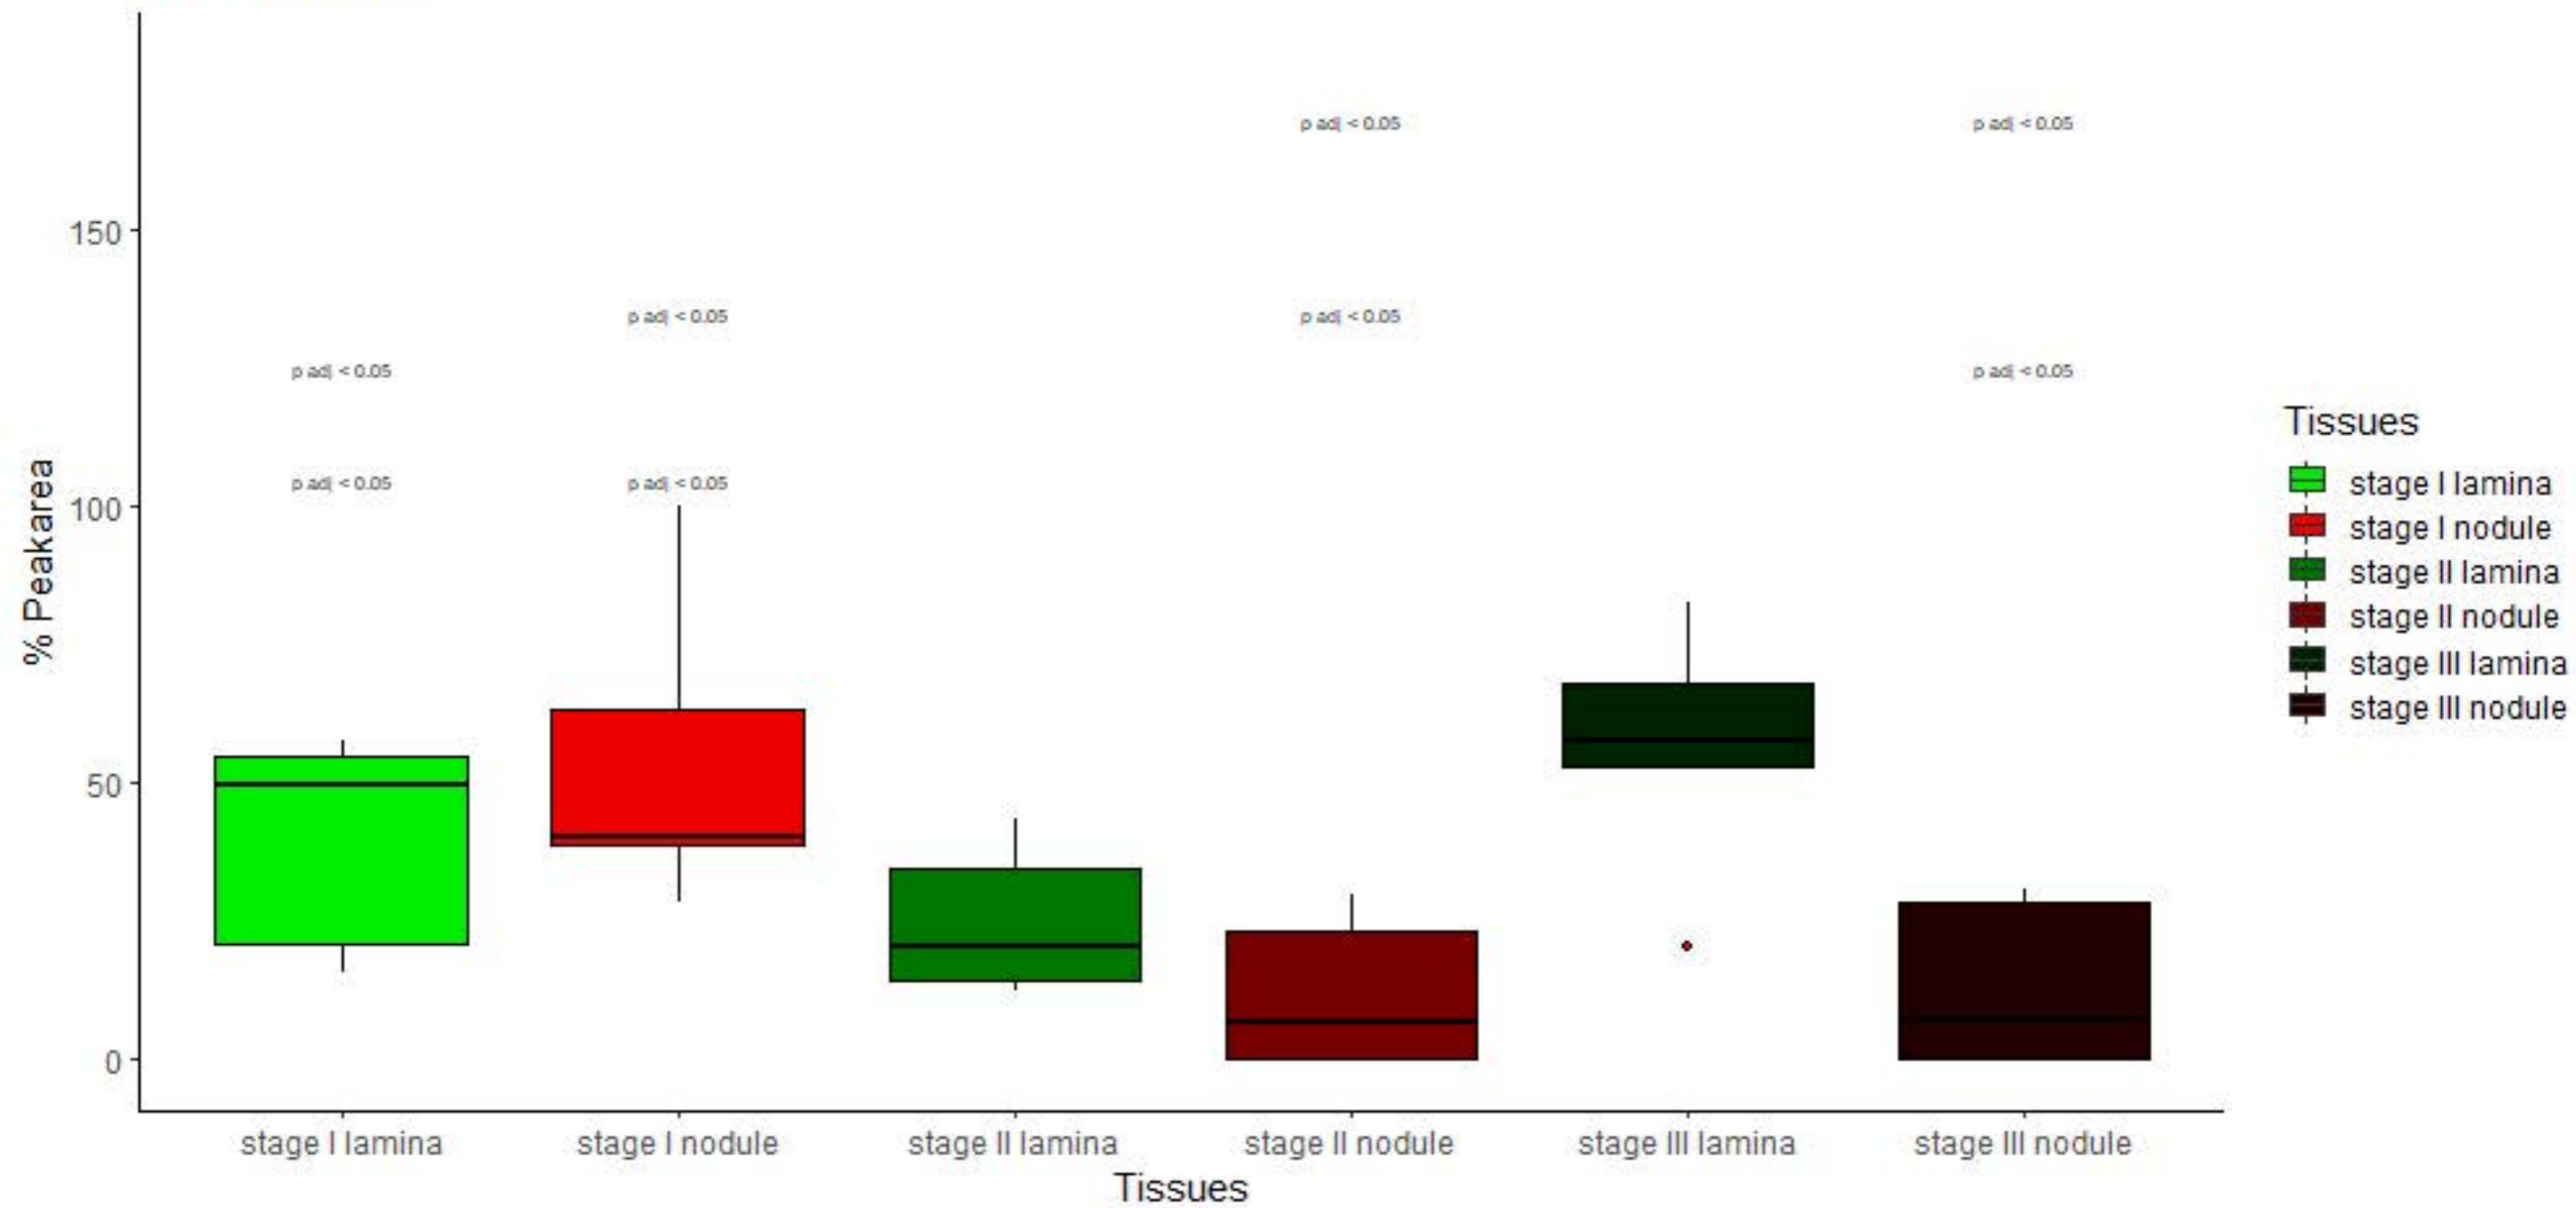



# Malic acid S50

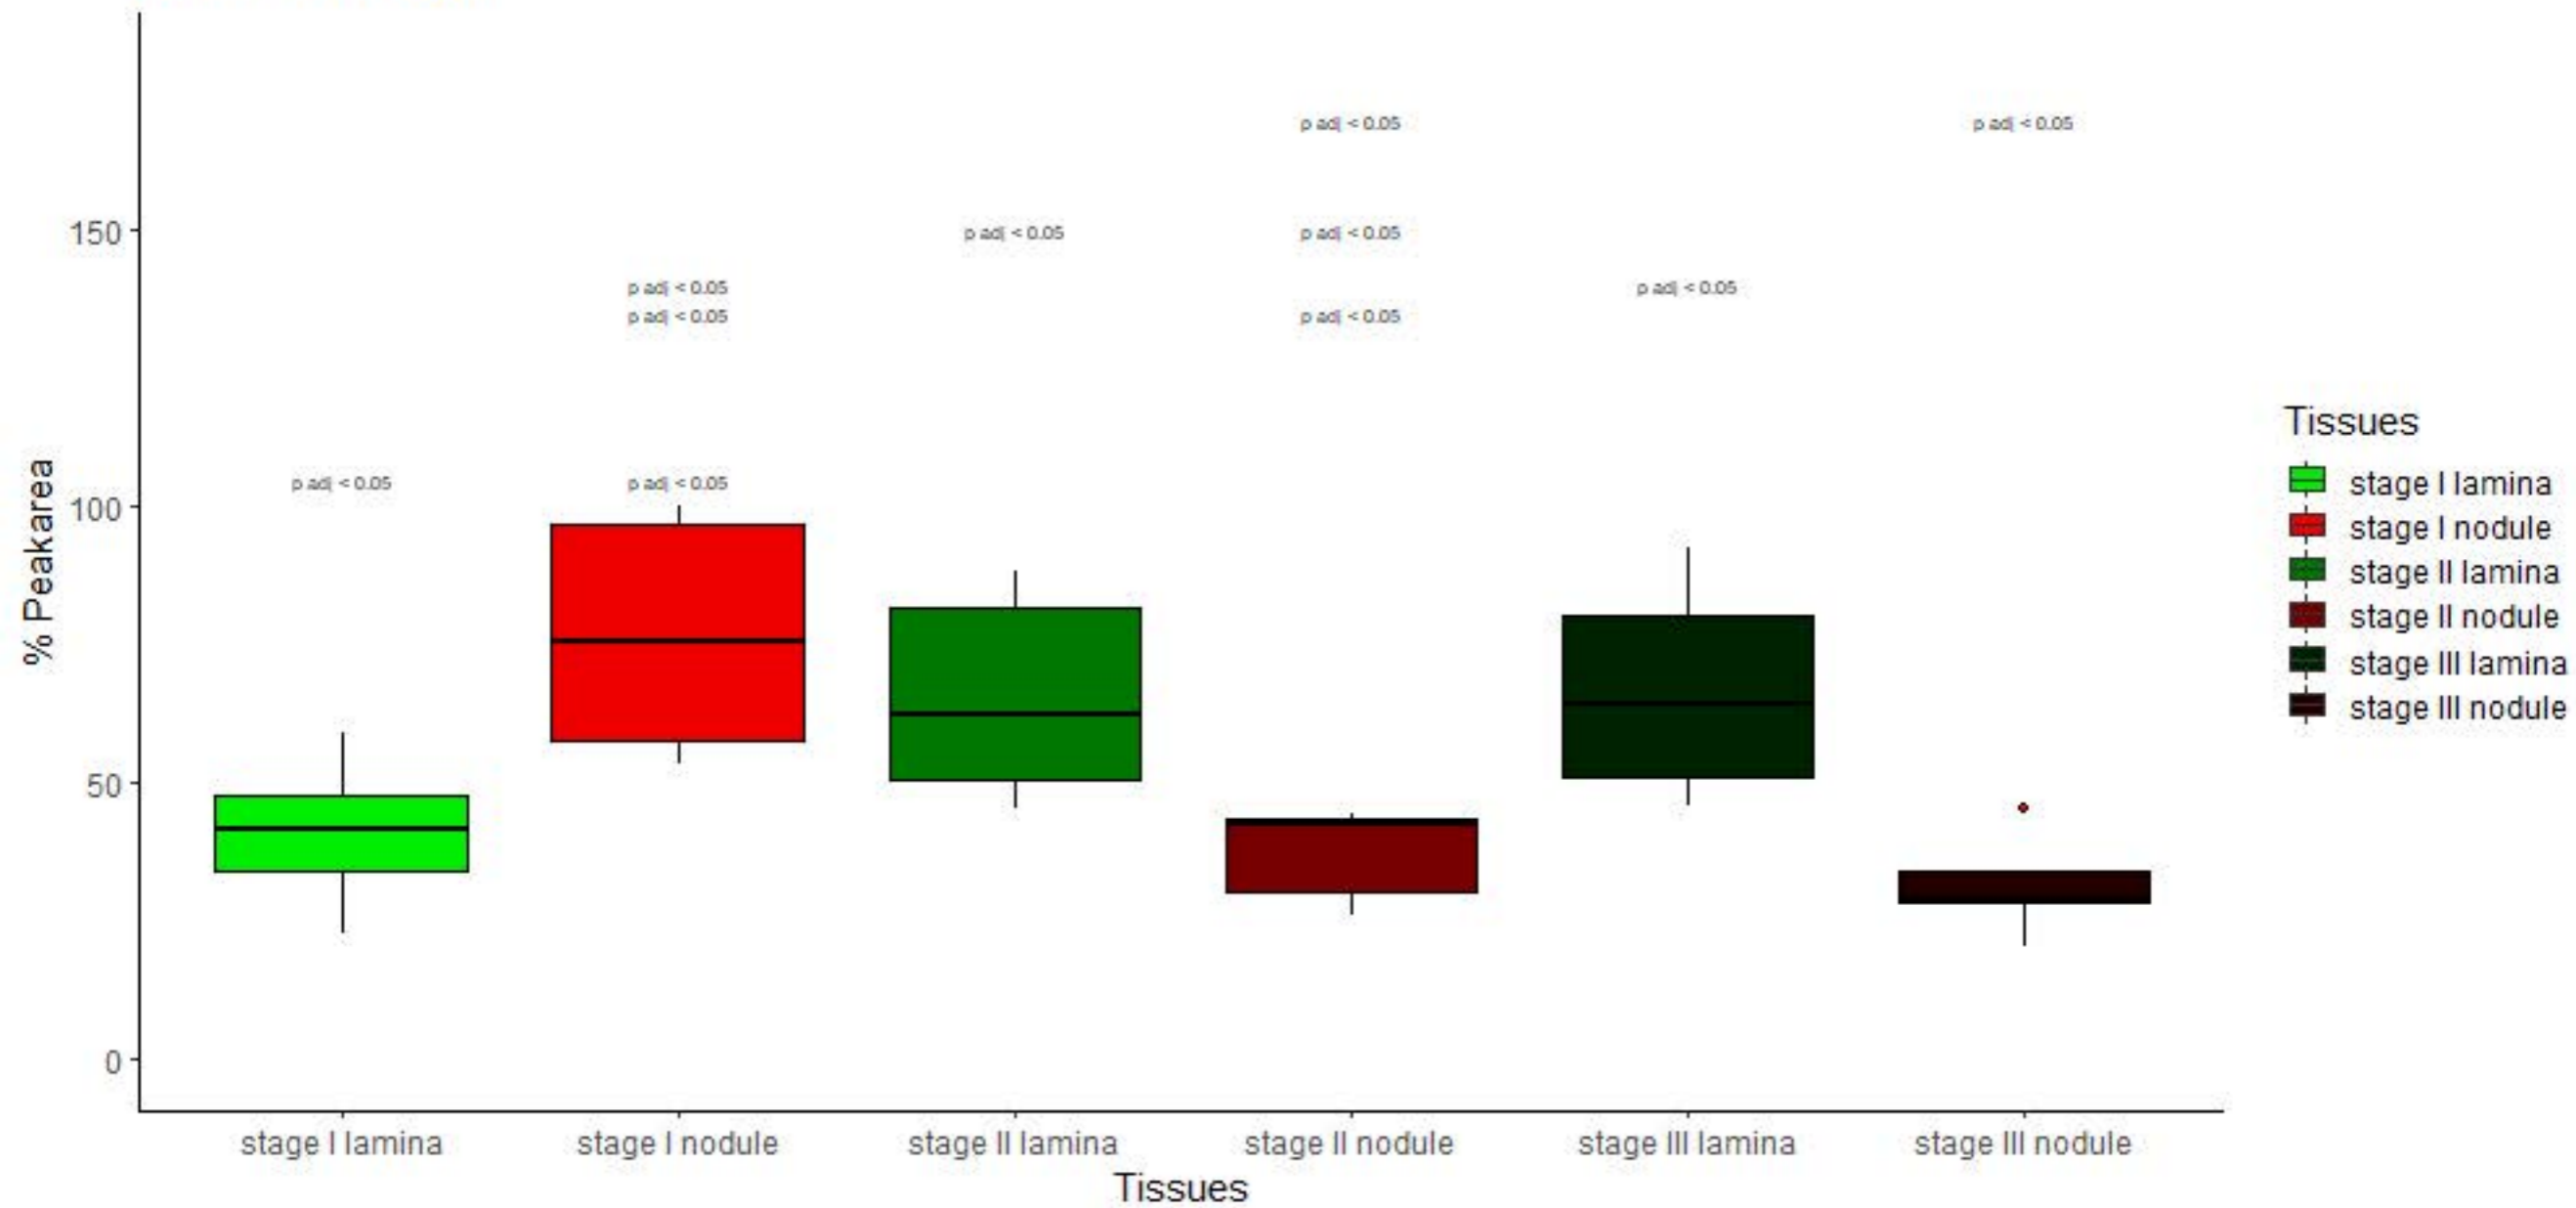

# Citric acid

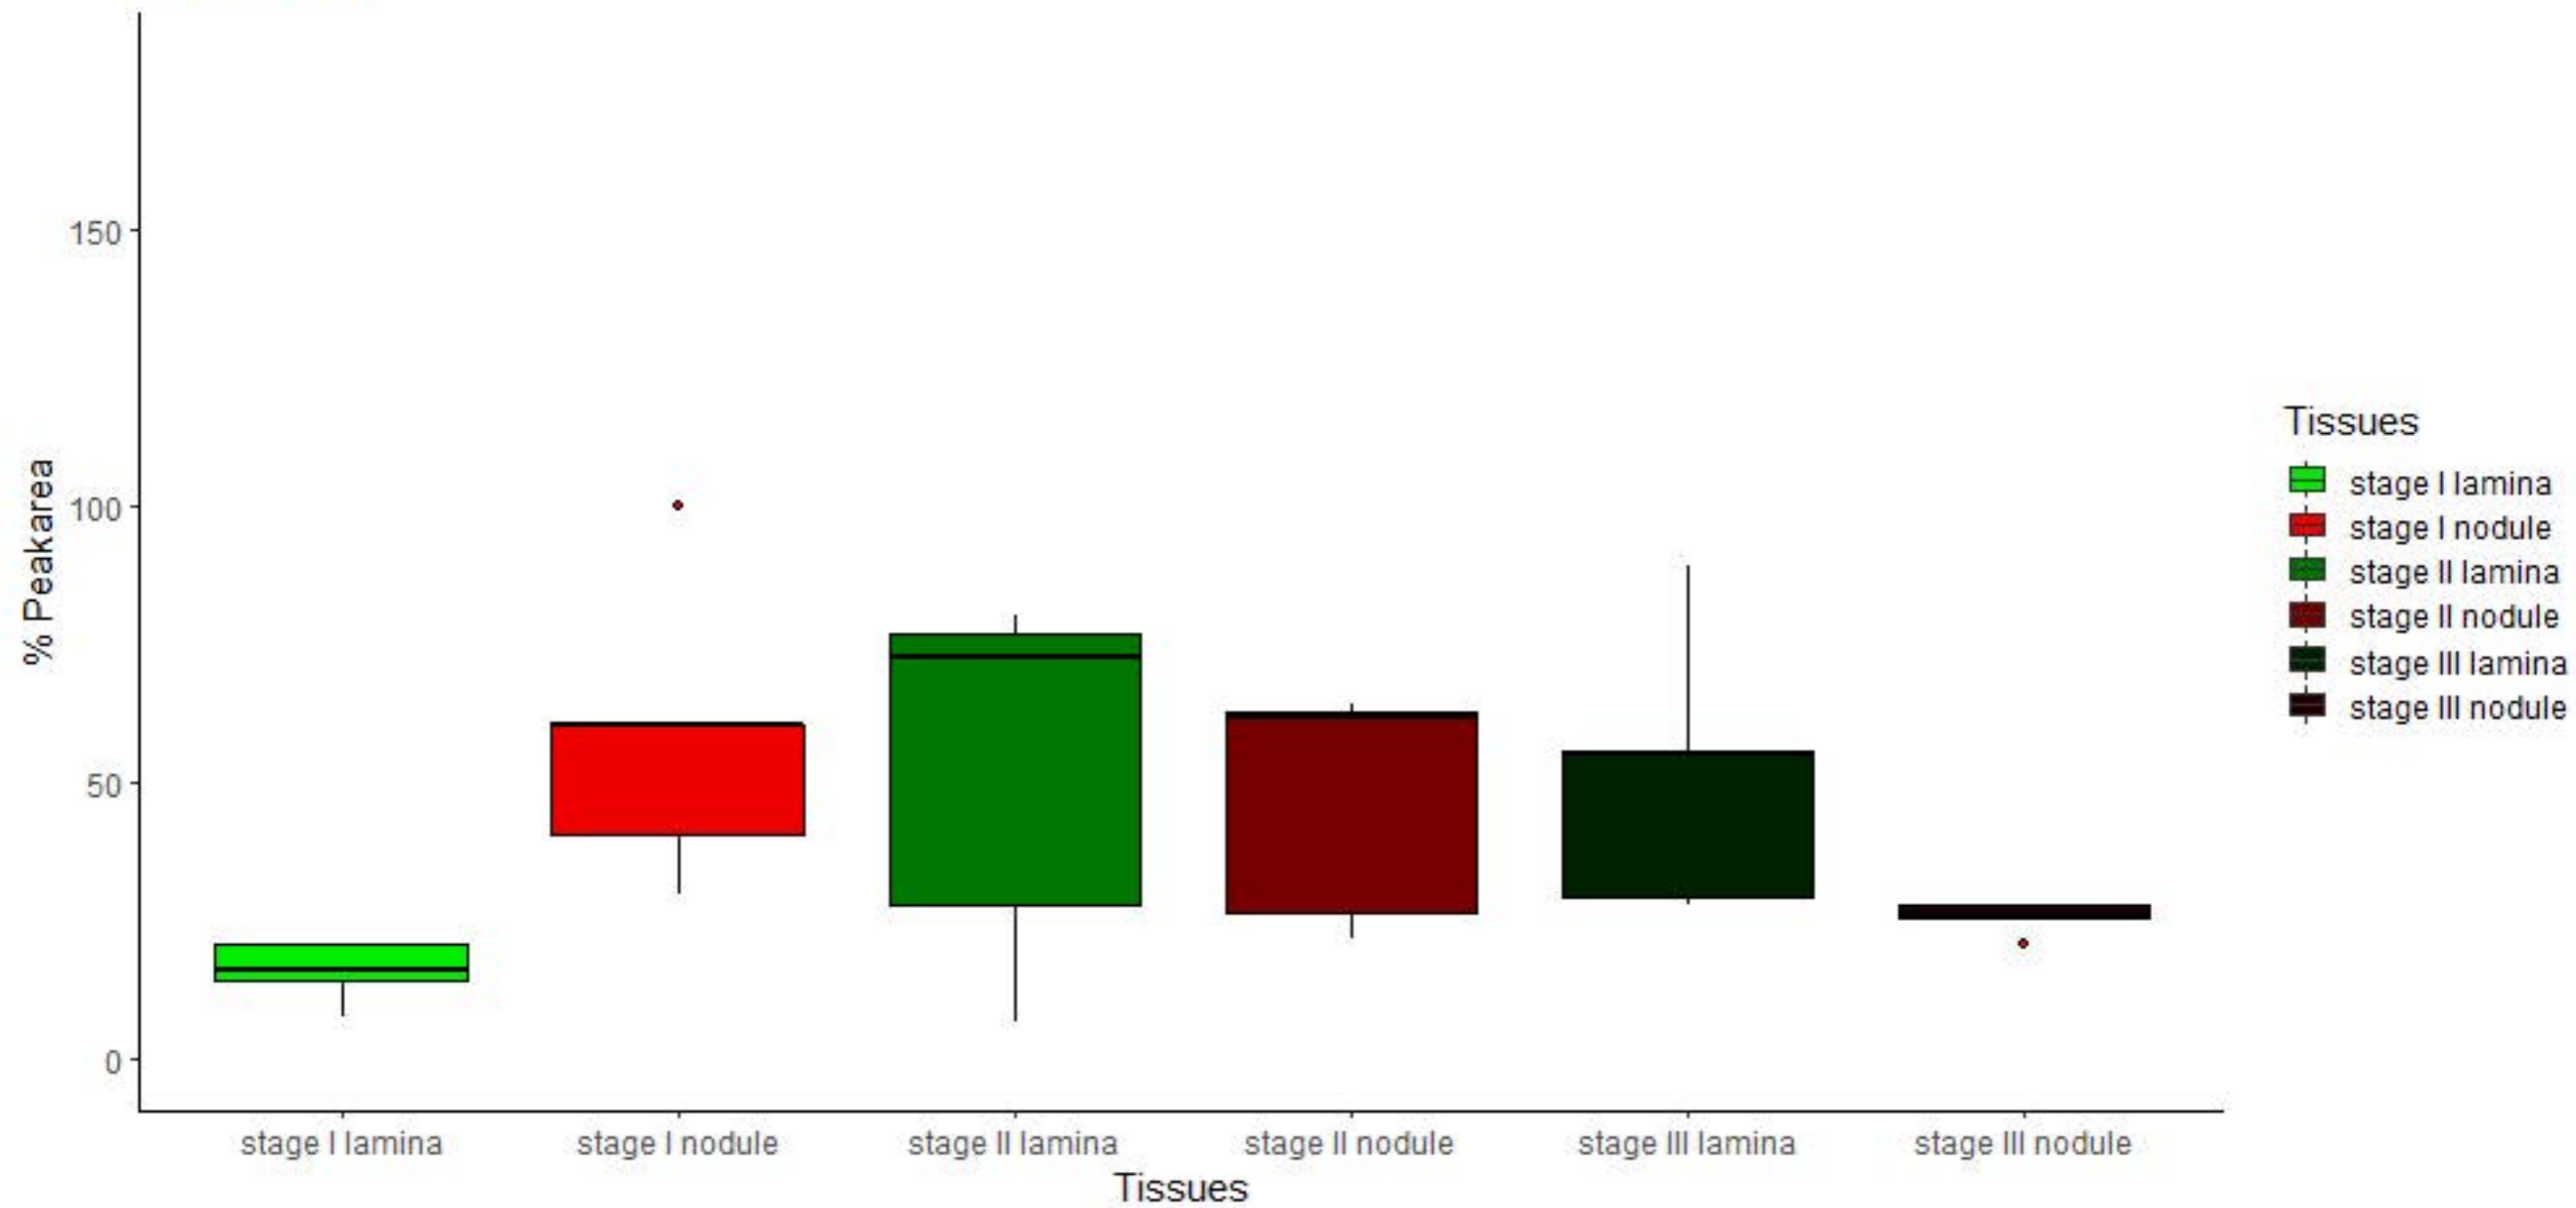

# Citric acid, 2-methyl-

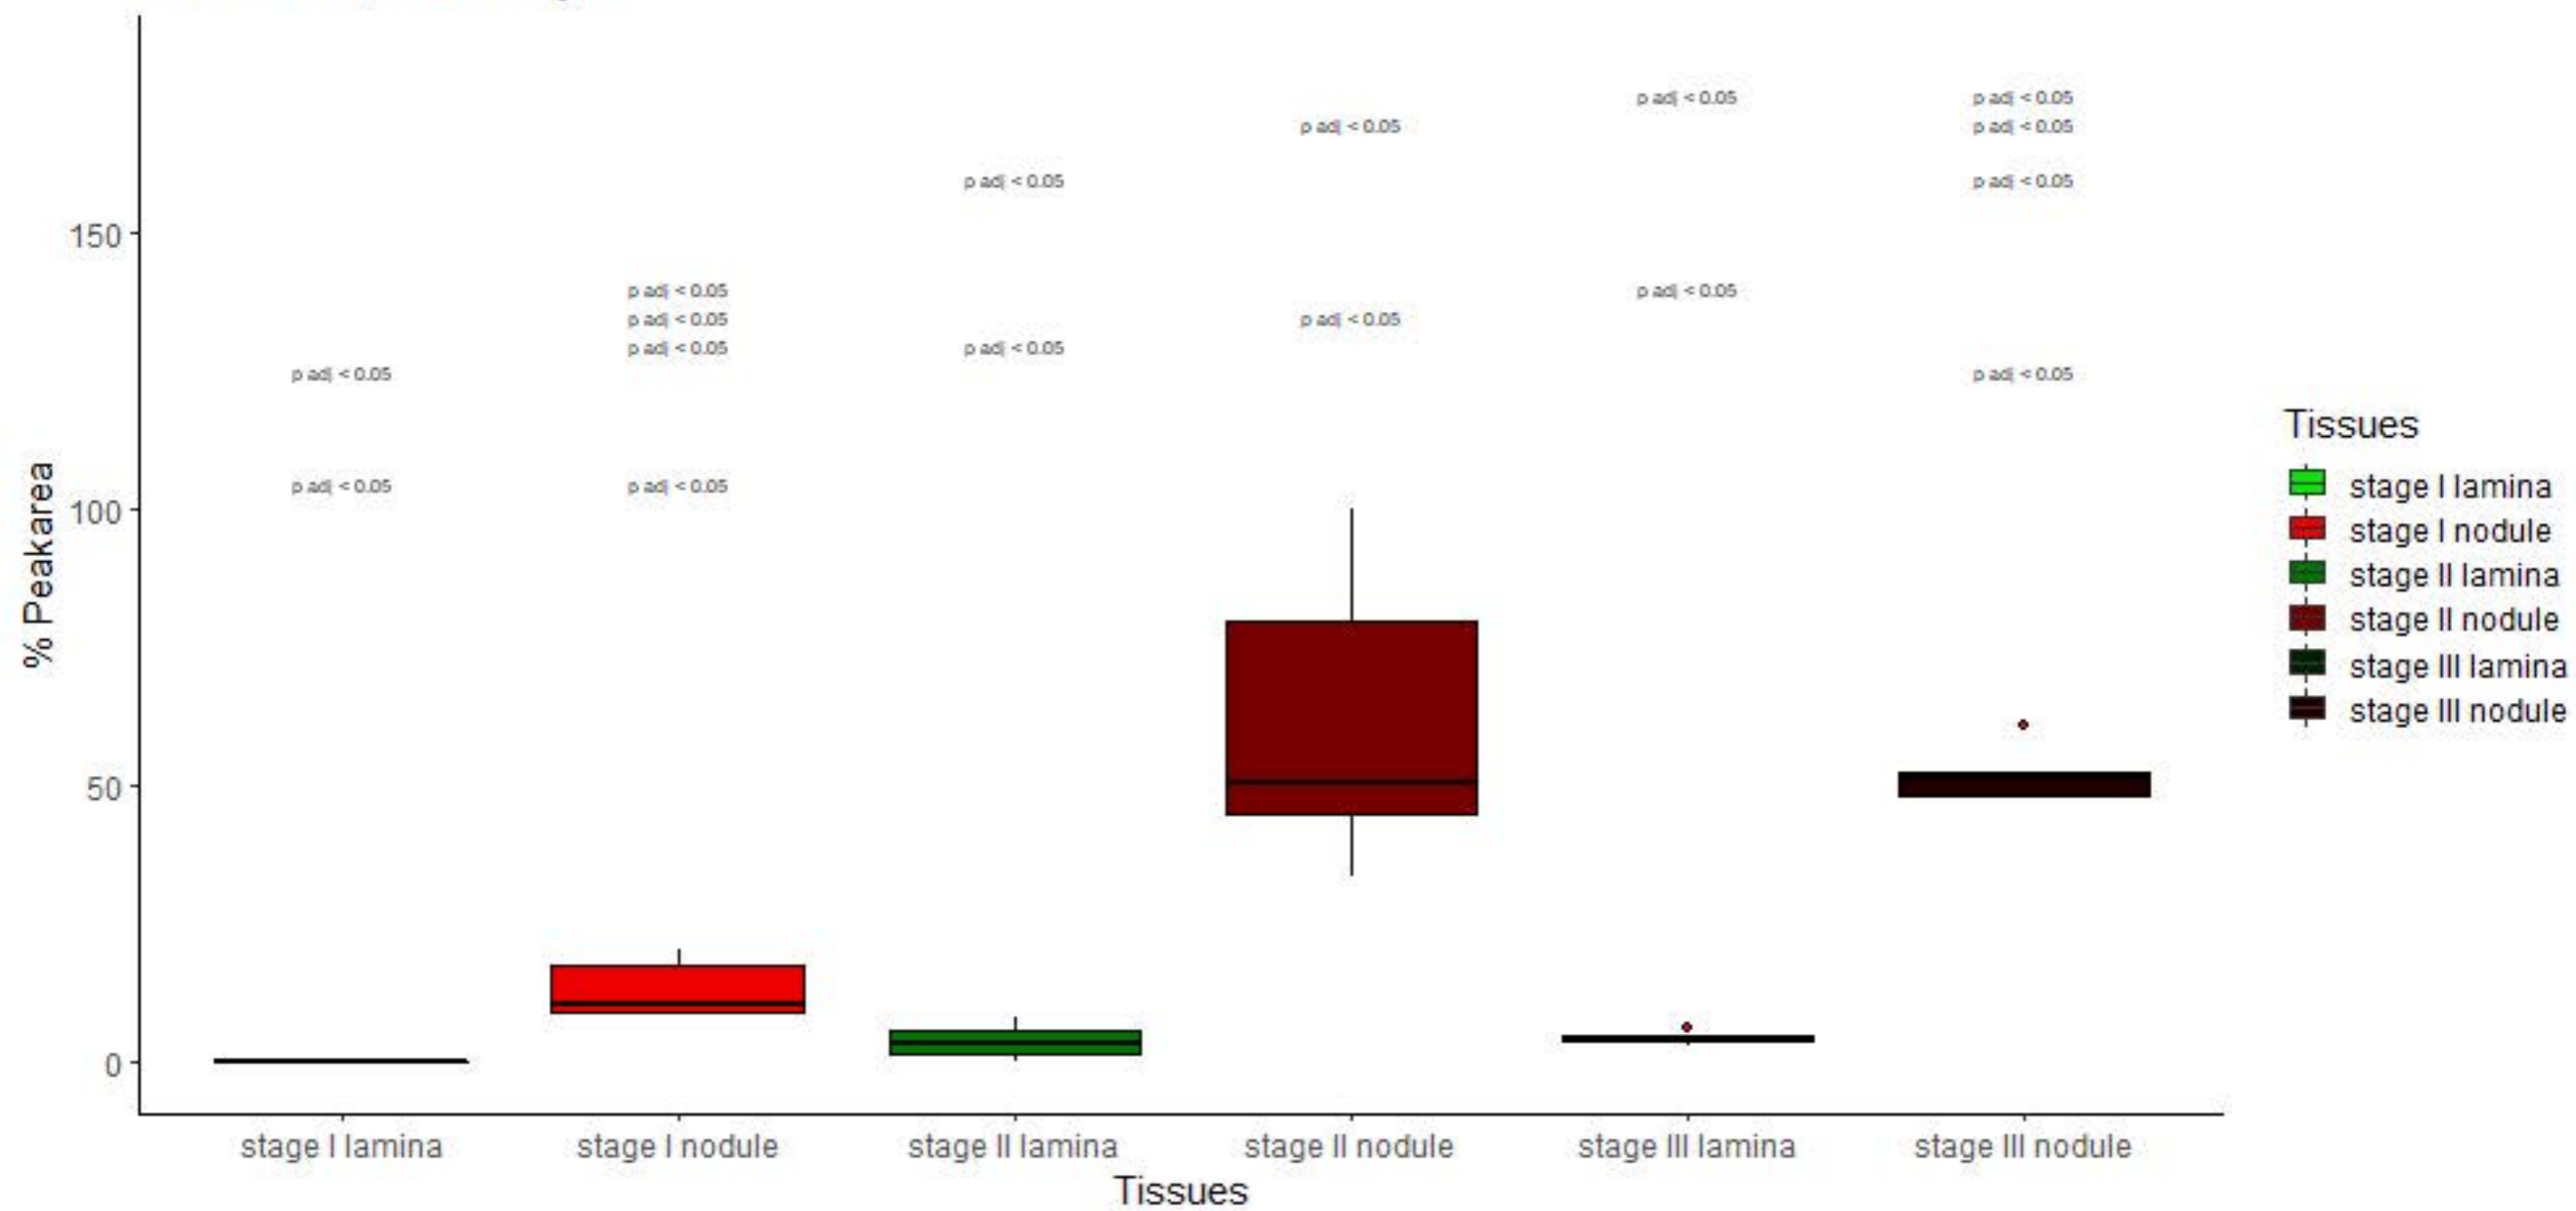

# Glycolic acid

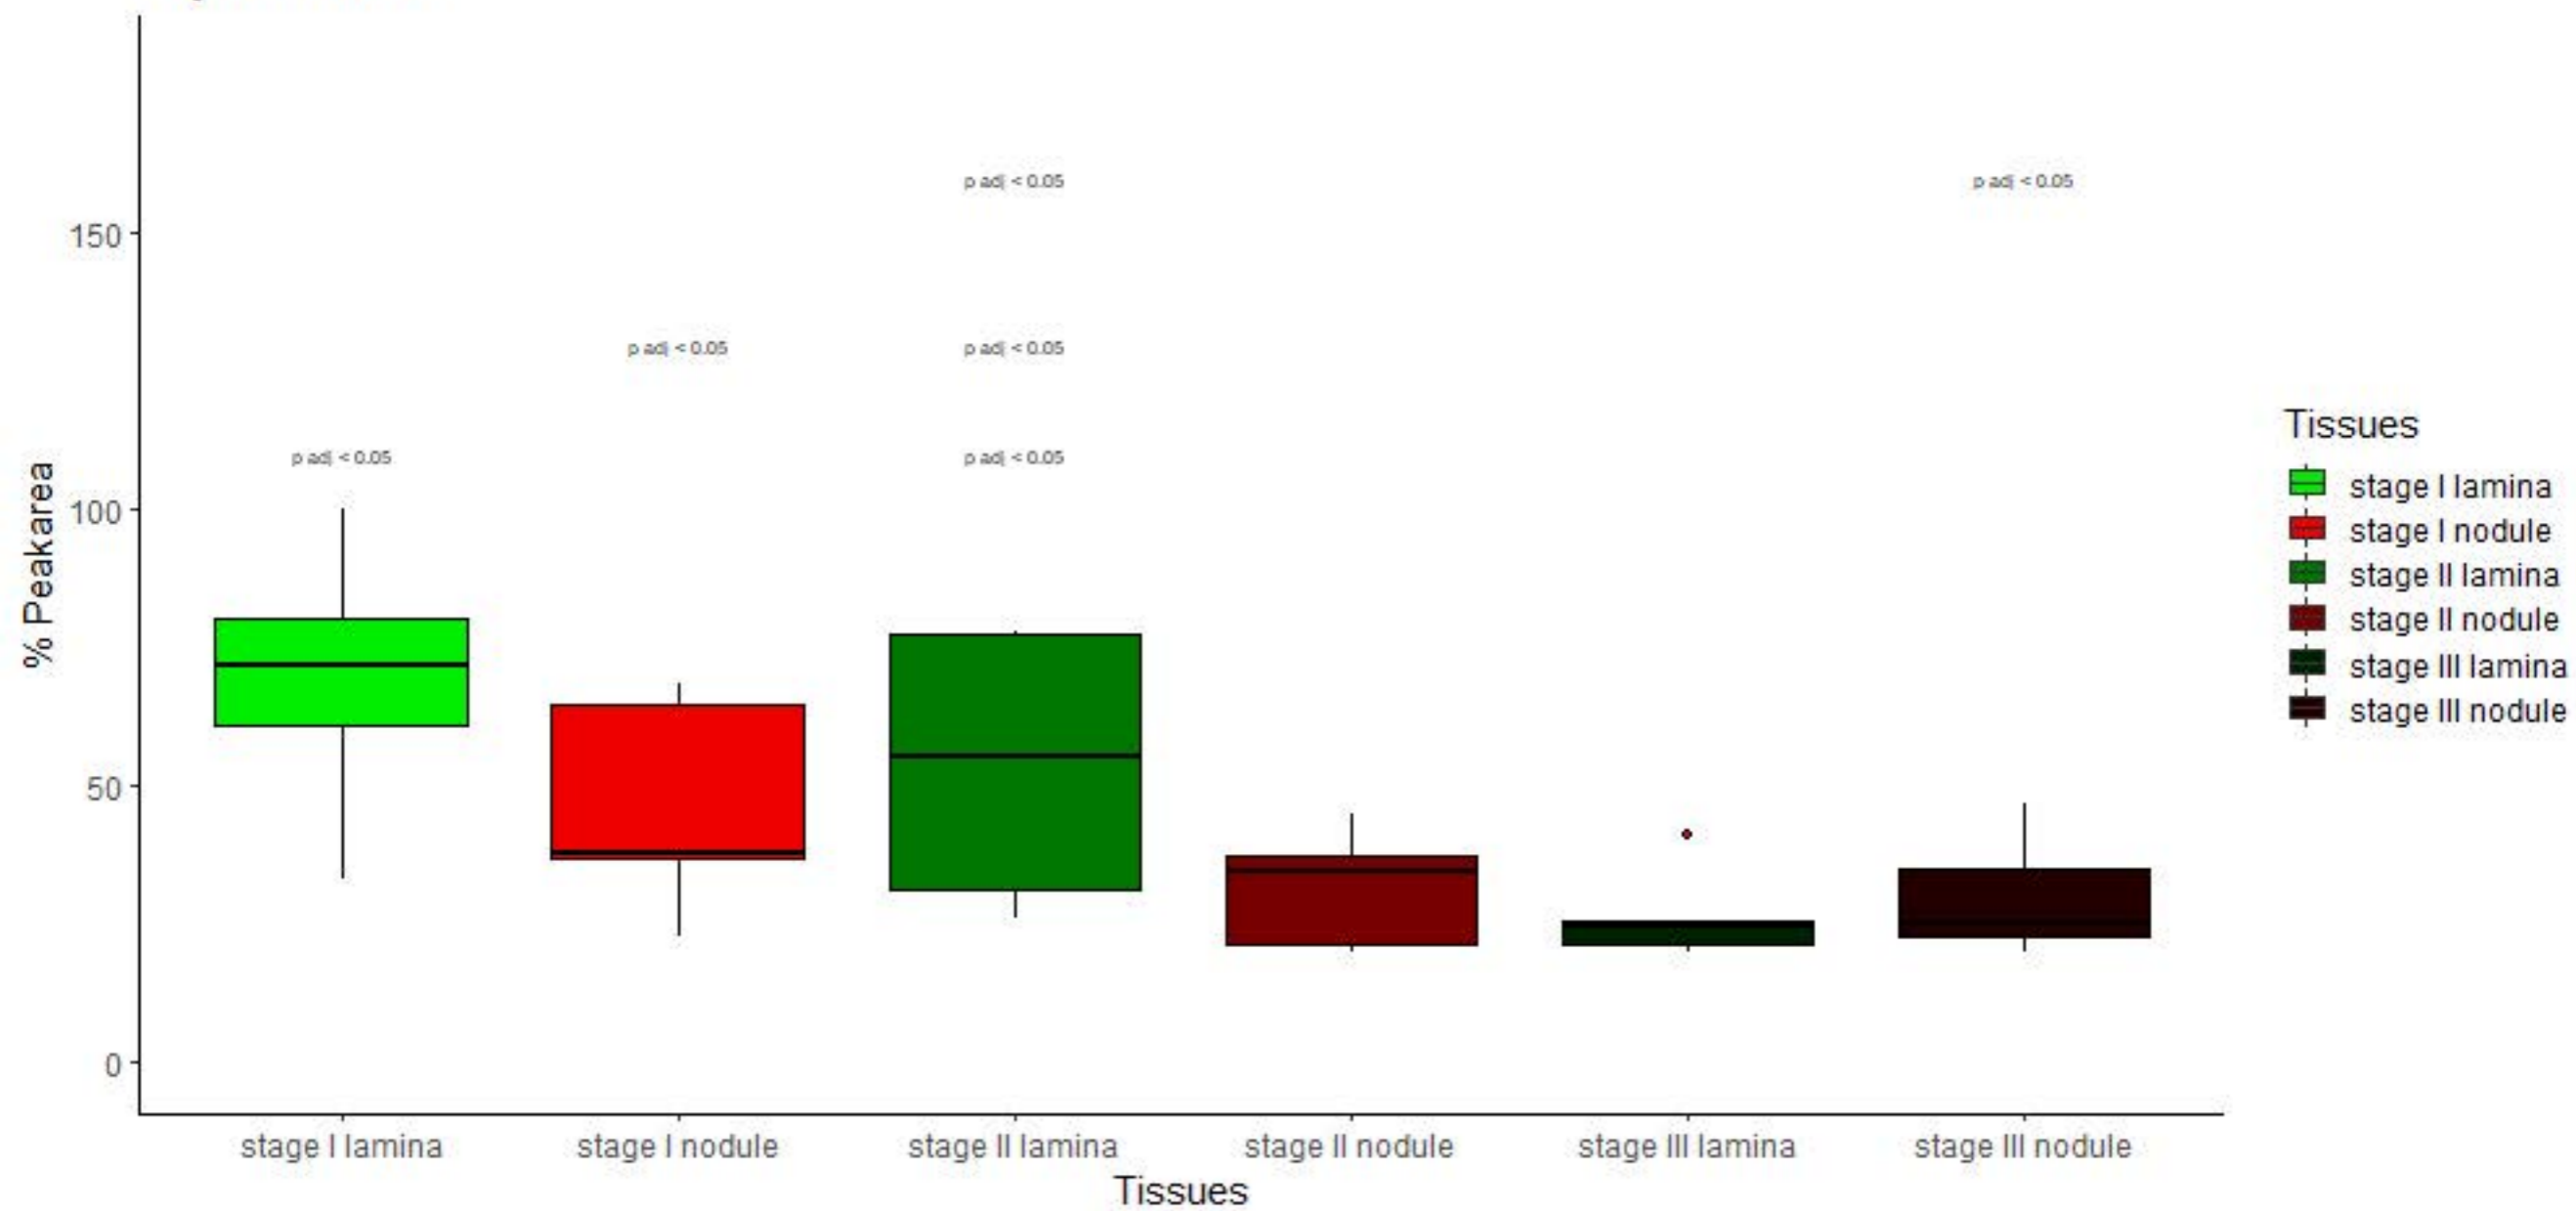

# Ascorbic acid

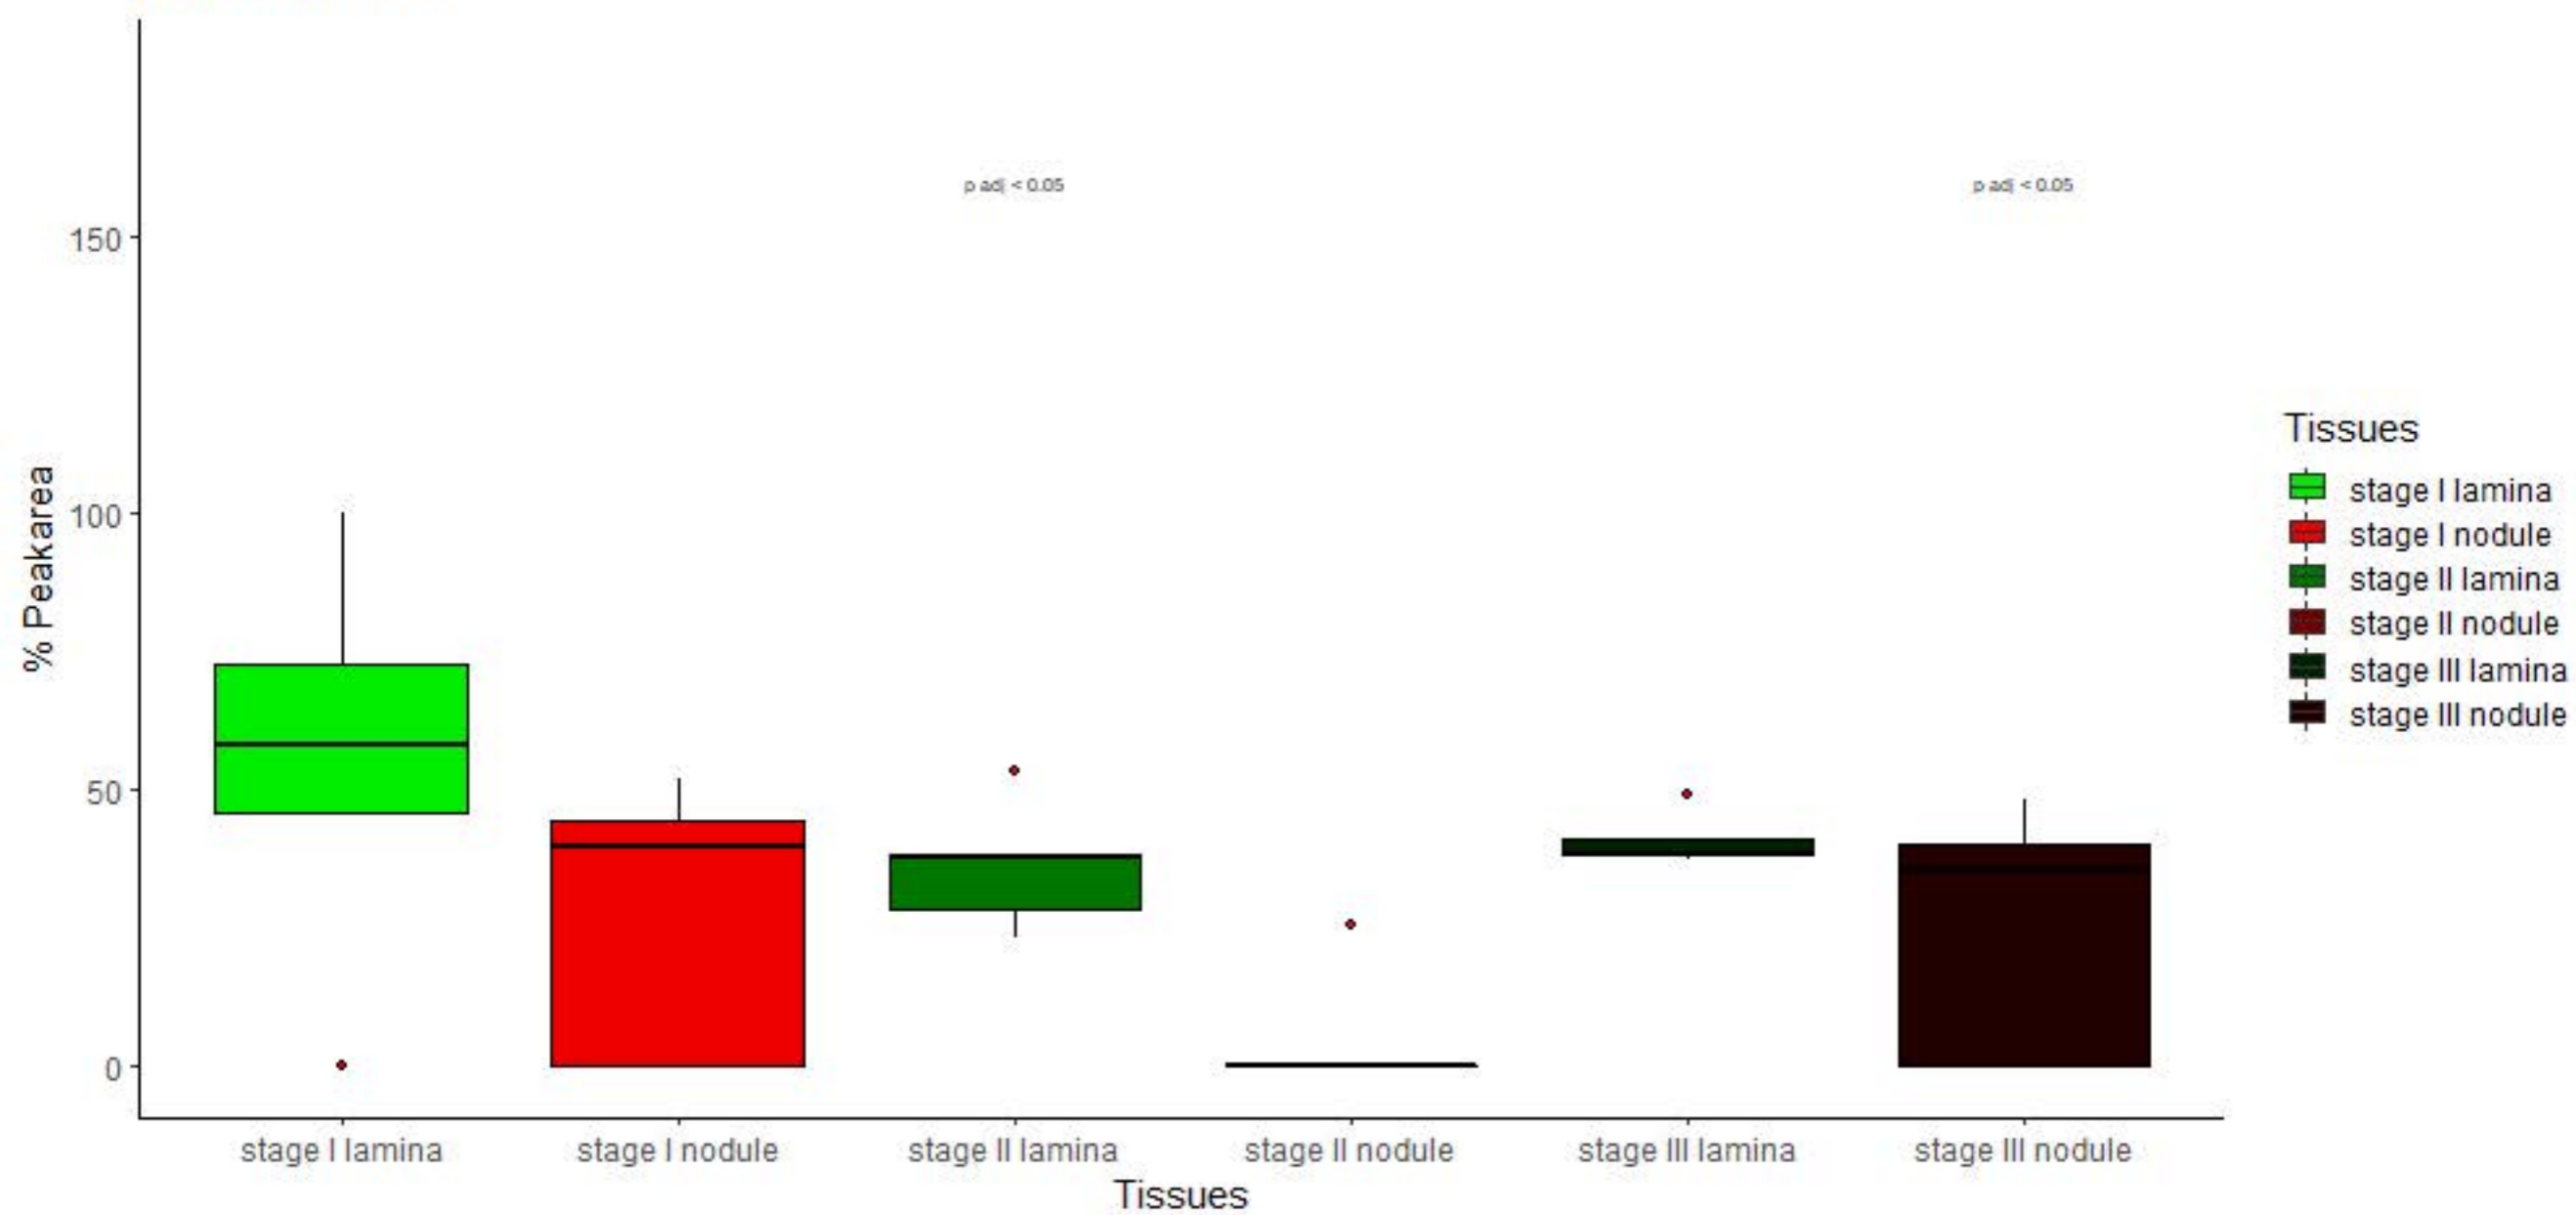

# Dehydroascorbic acid dimer

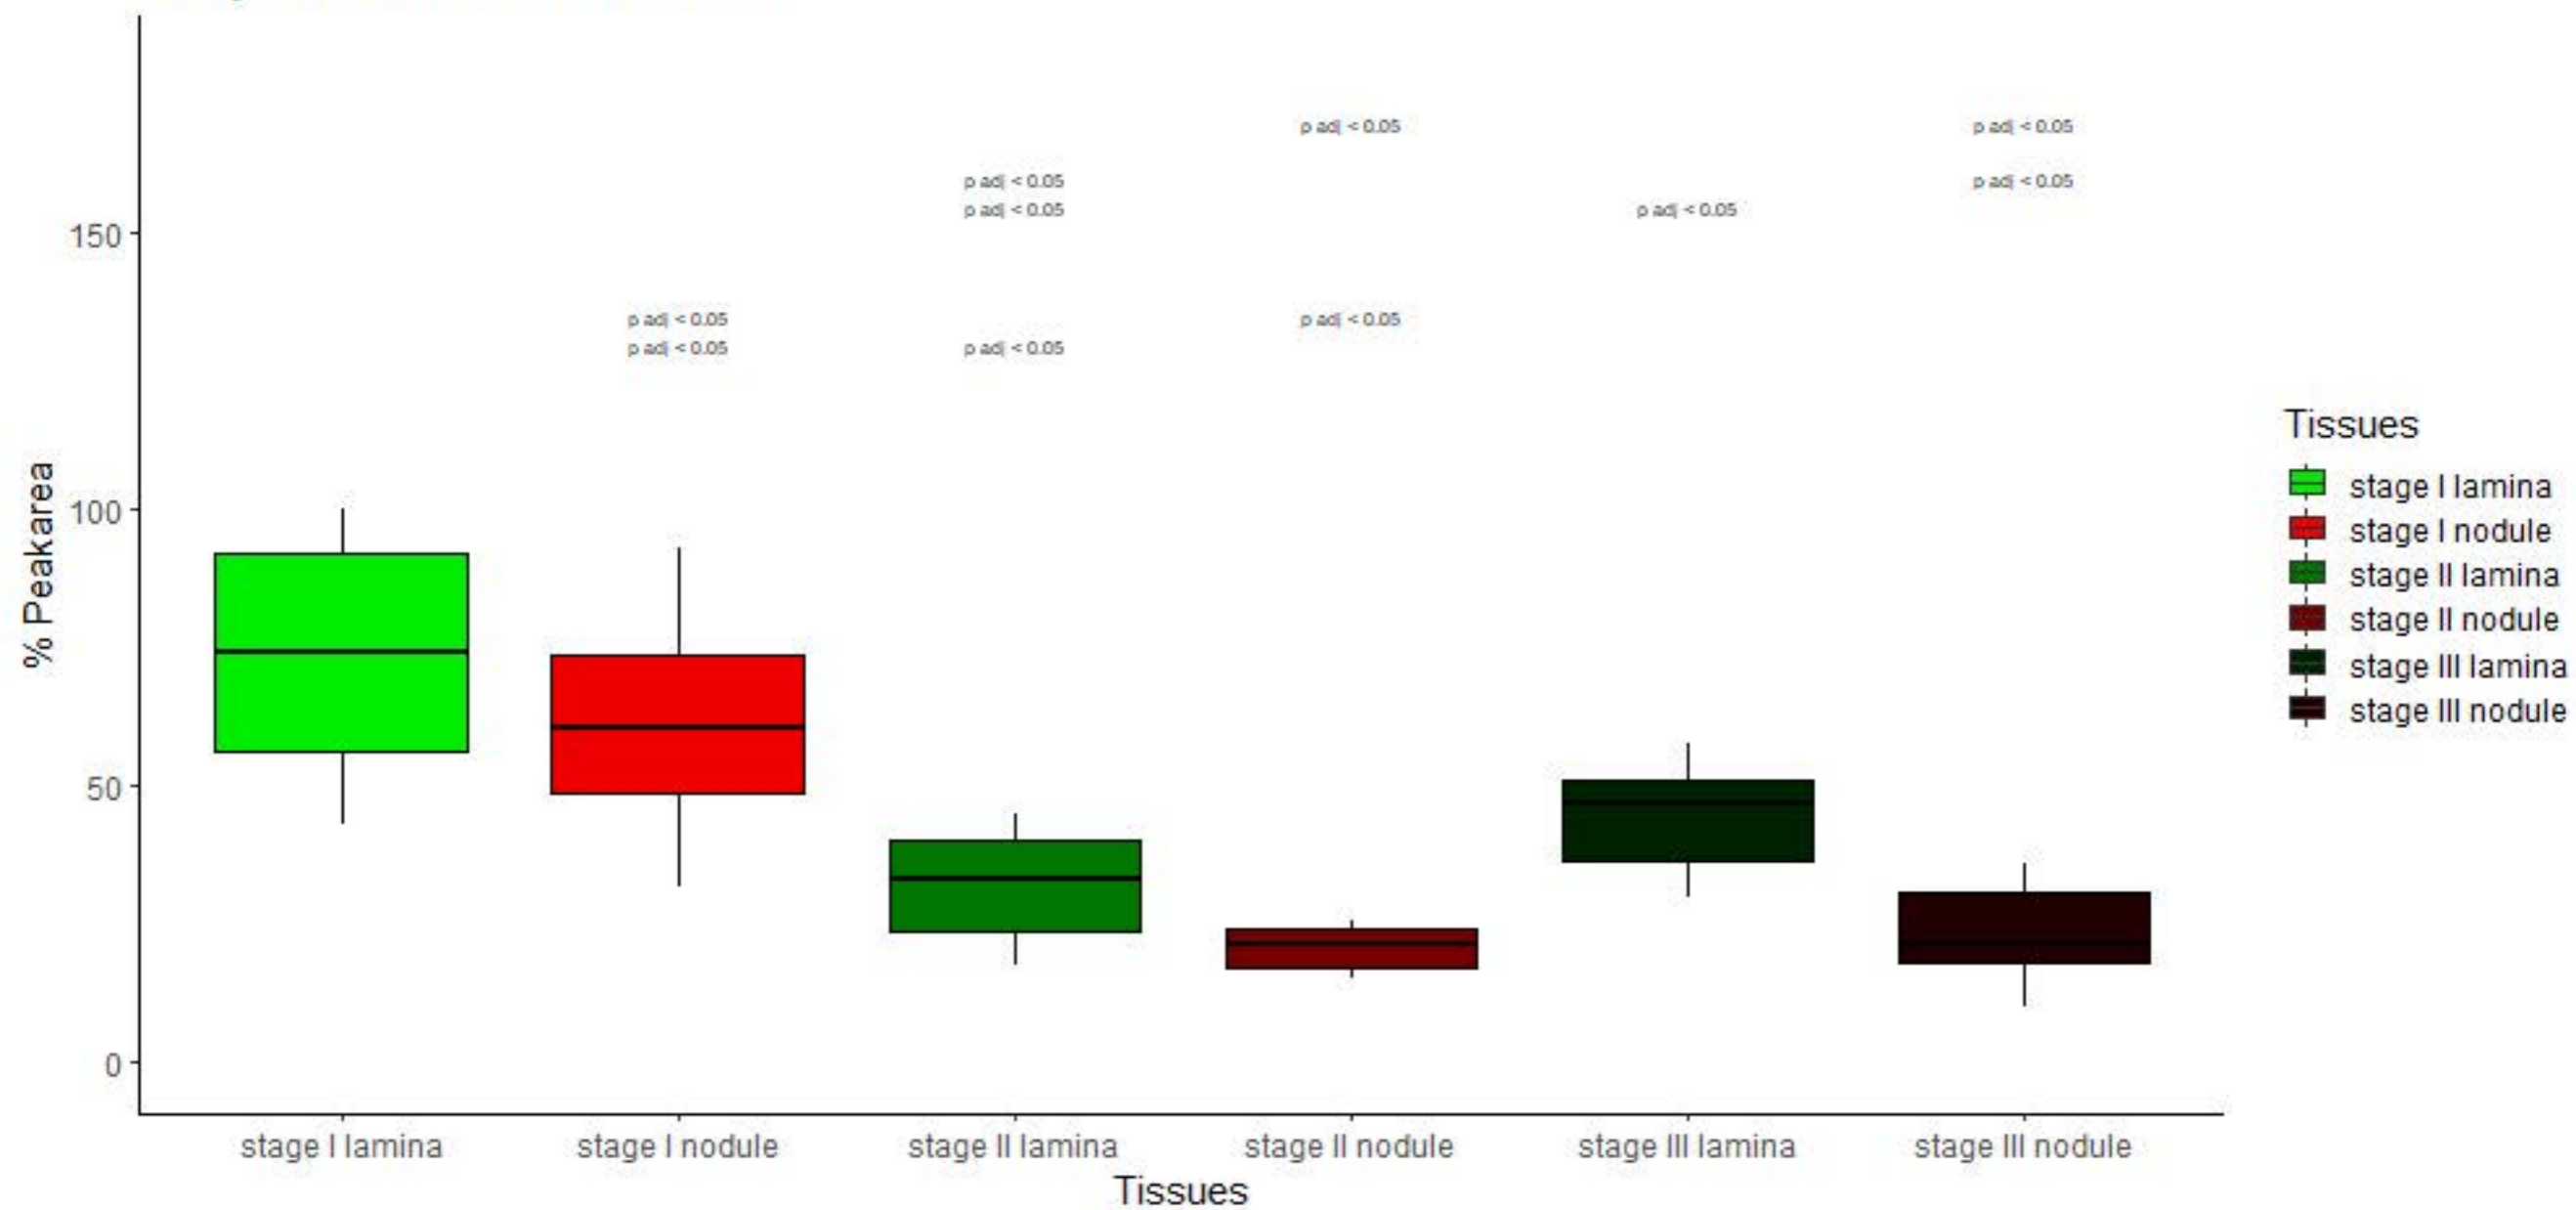

# Dodecanoic acid

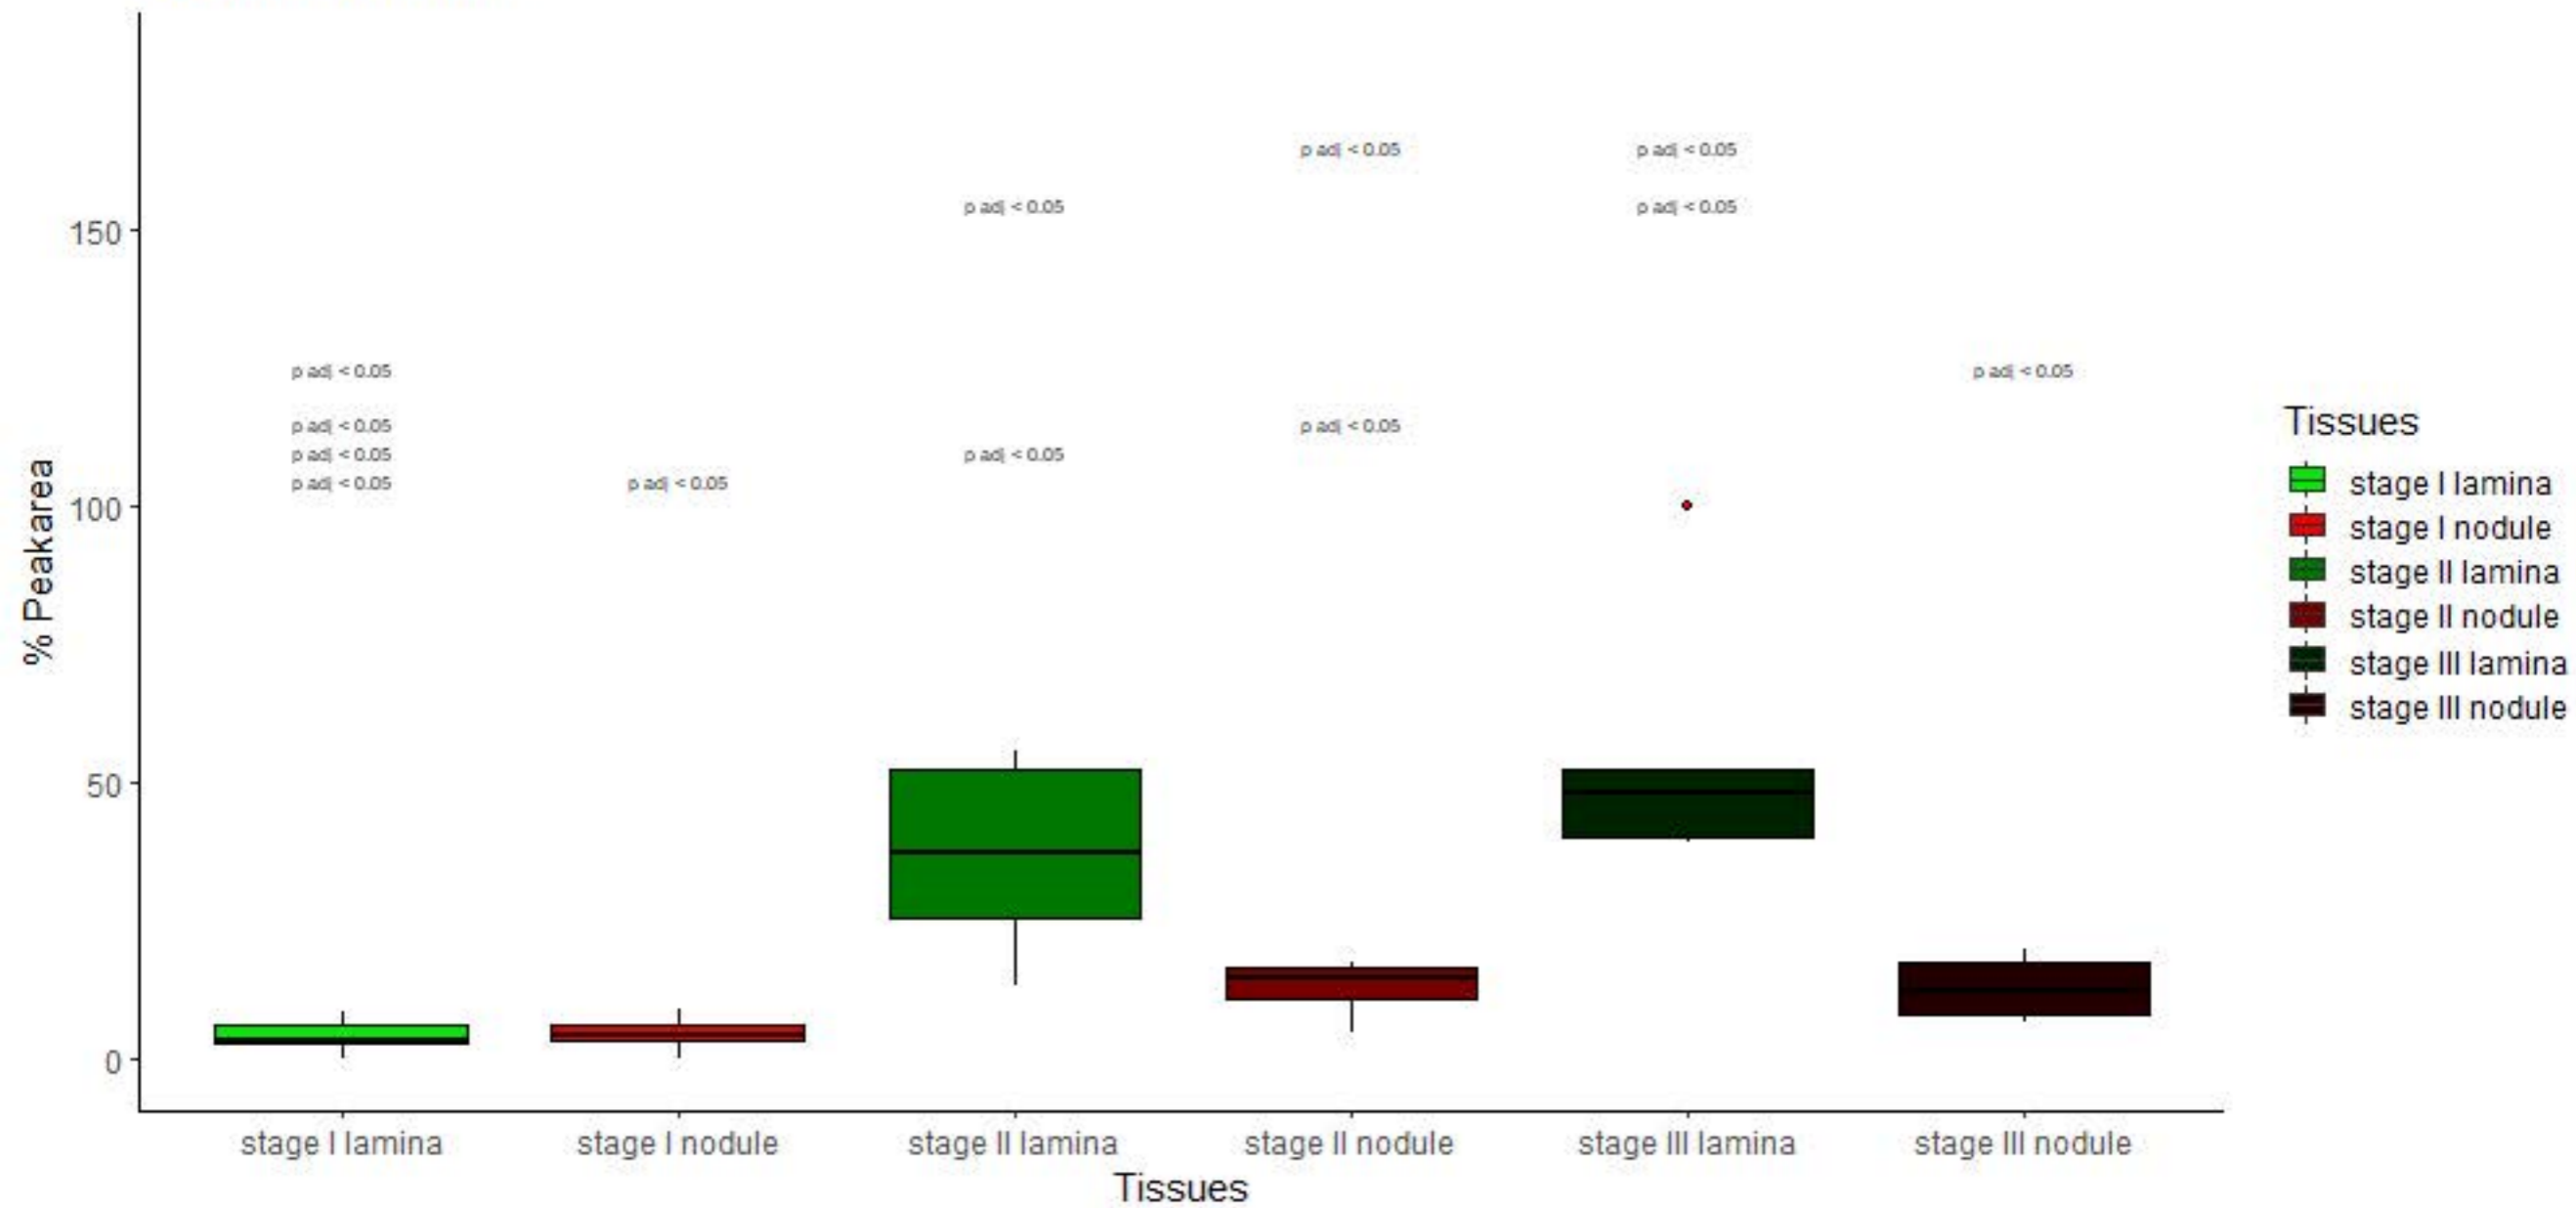

# Tetradecanoic acid

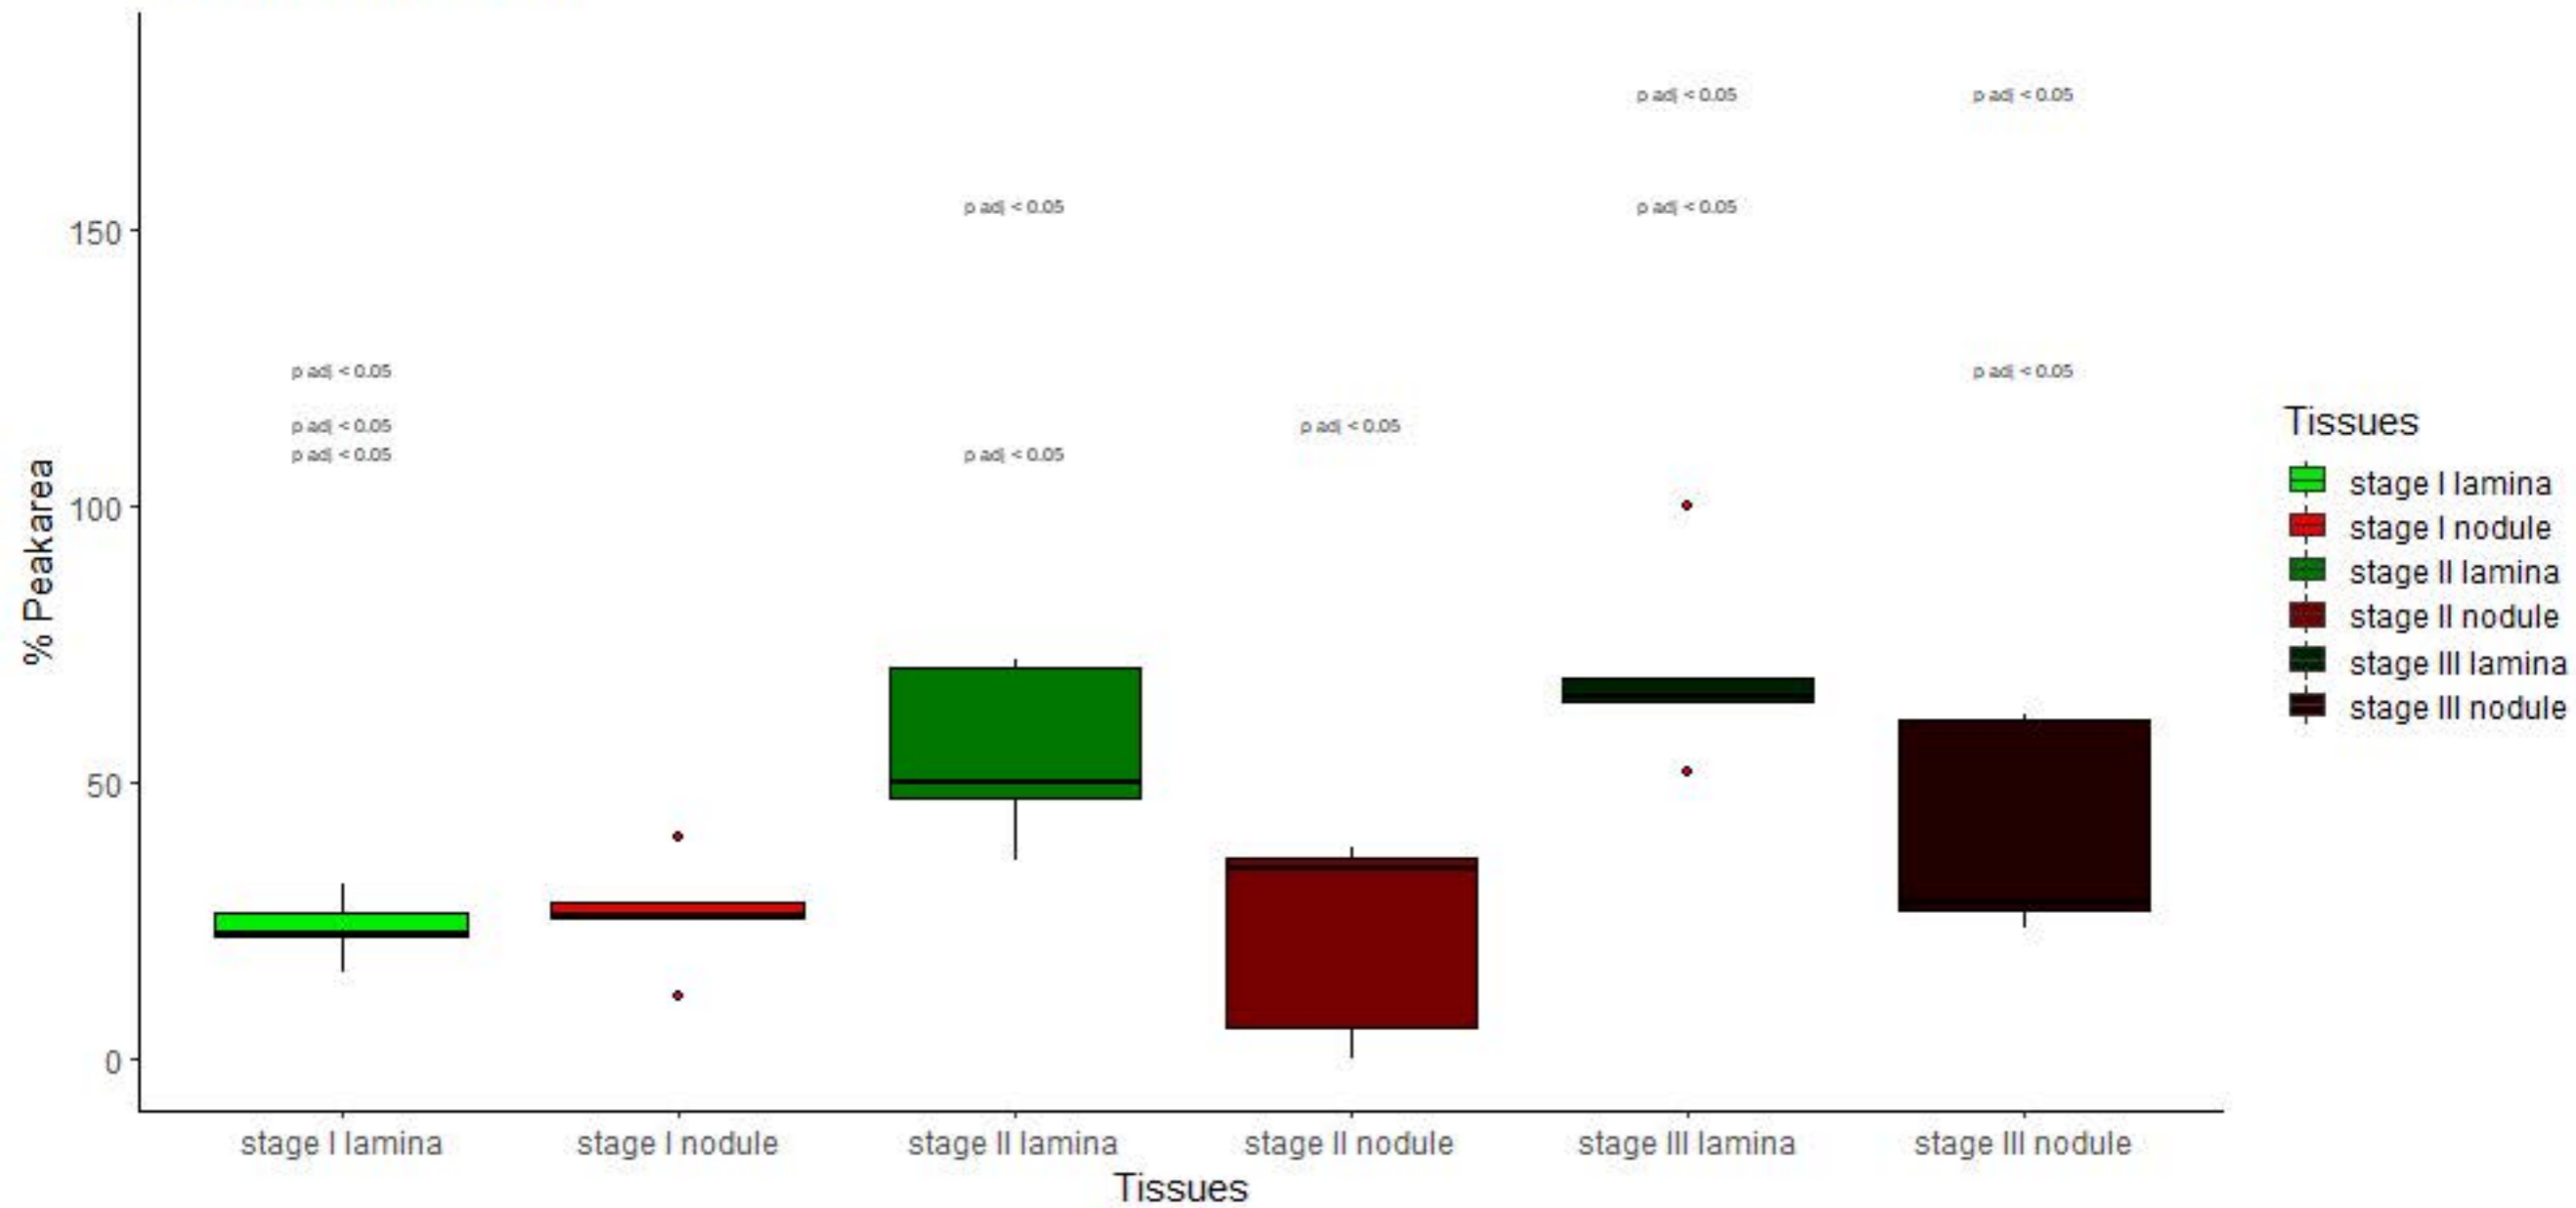



## ART/CONT Palmitic acid, Hexadecanoic acid MOSYS RI 2049

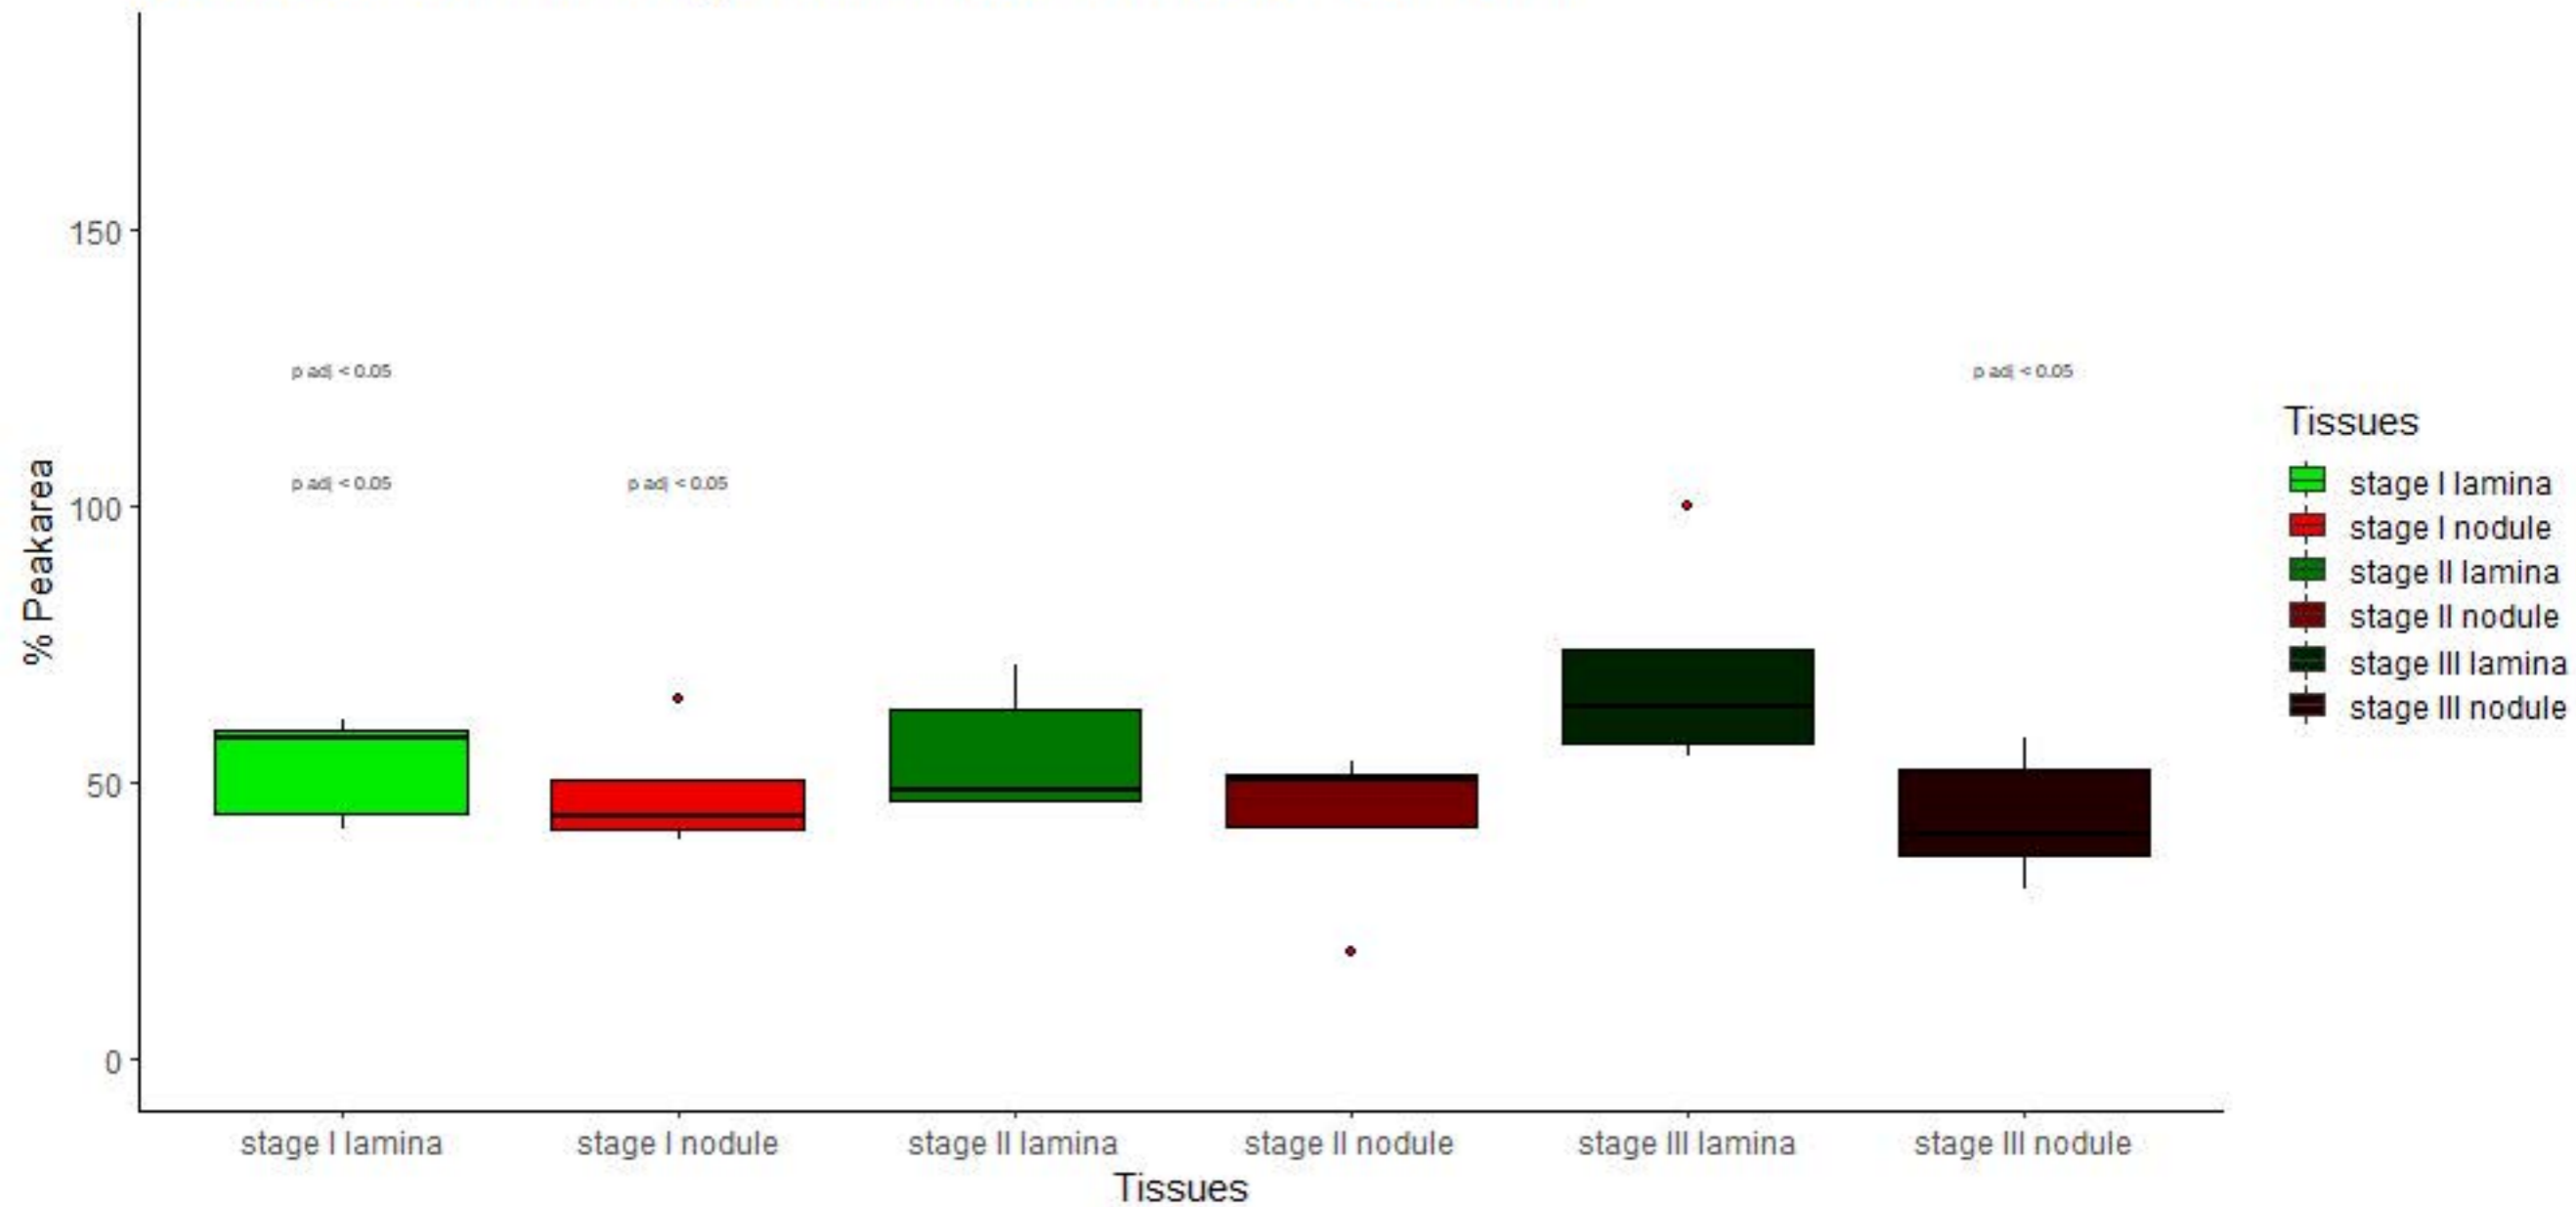

# Glyceric acid

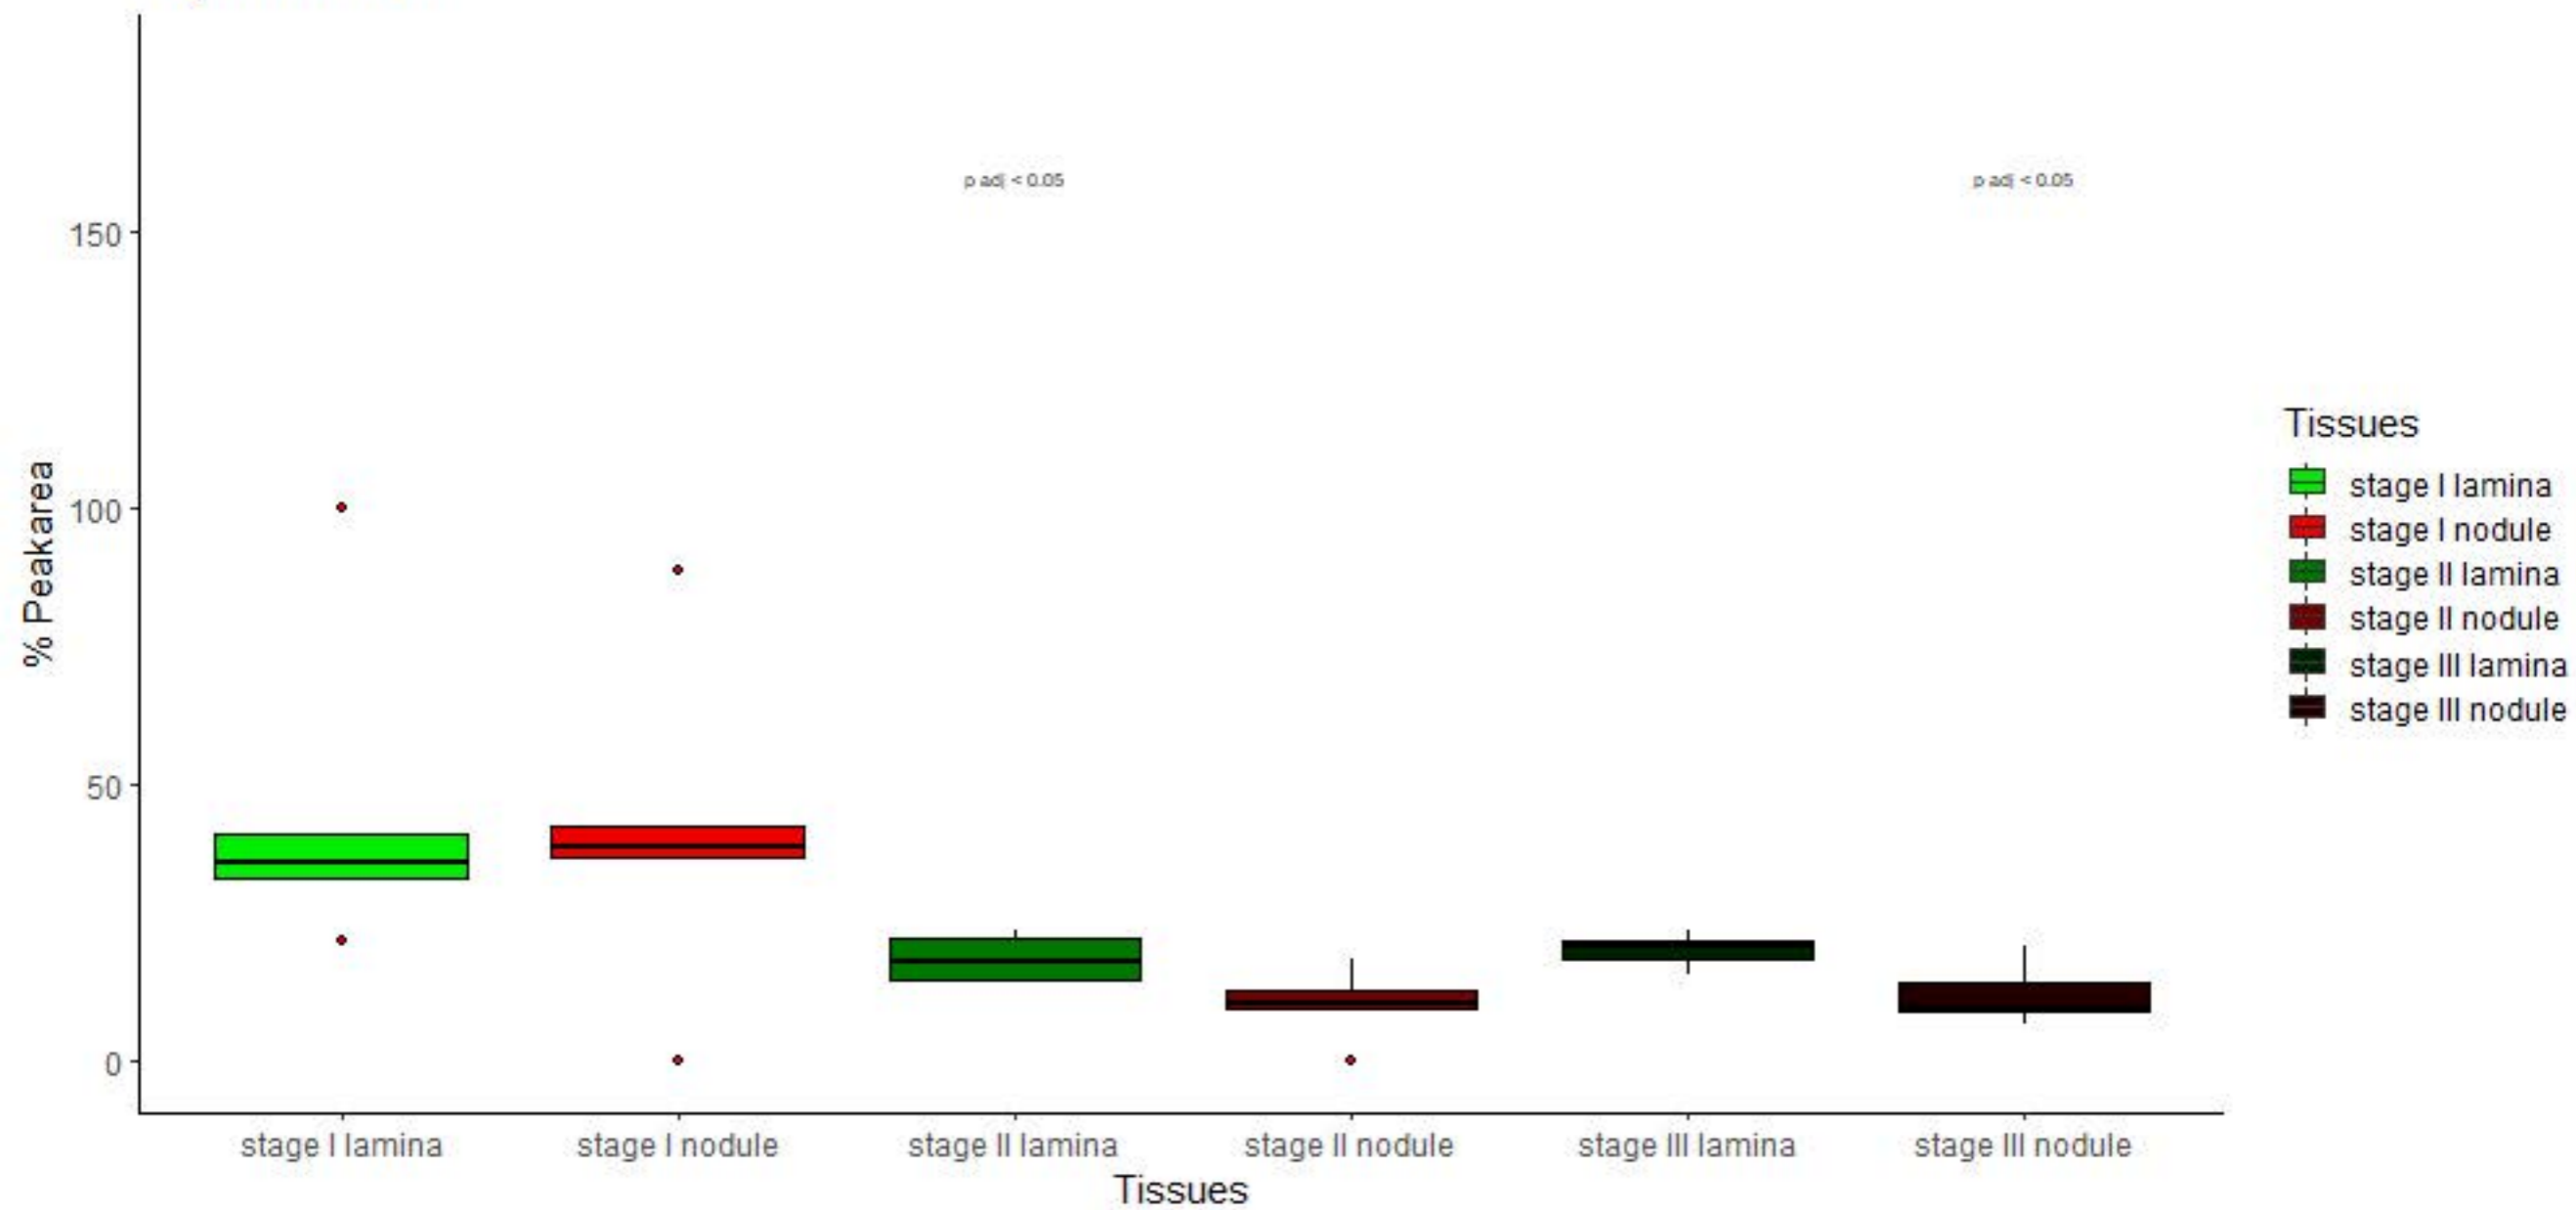

# Erythronic acid

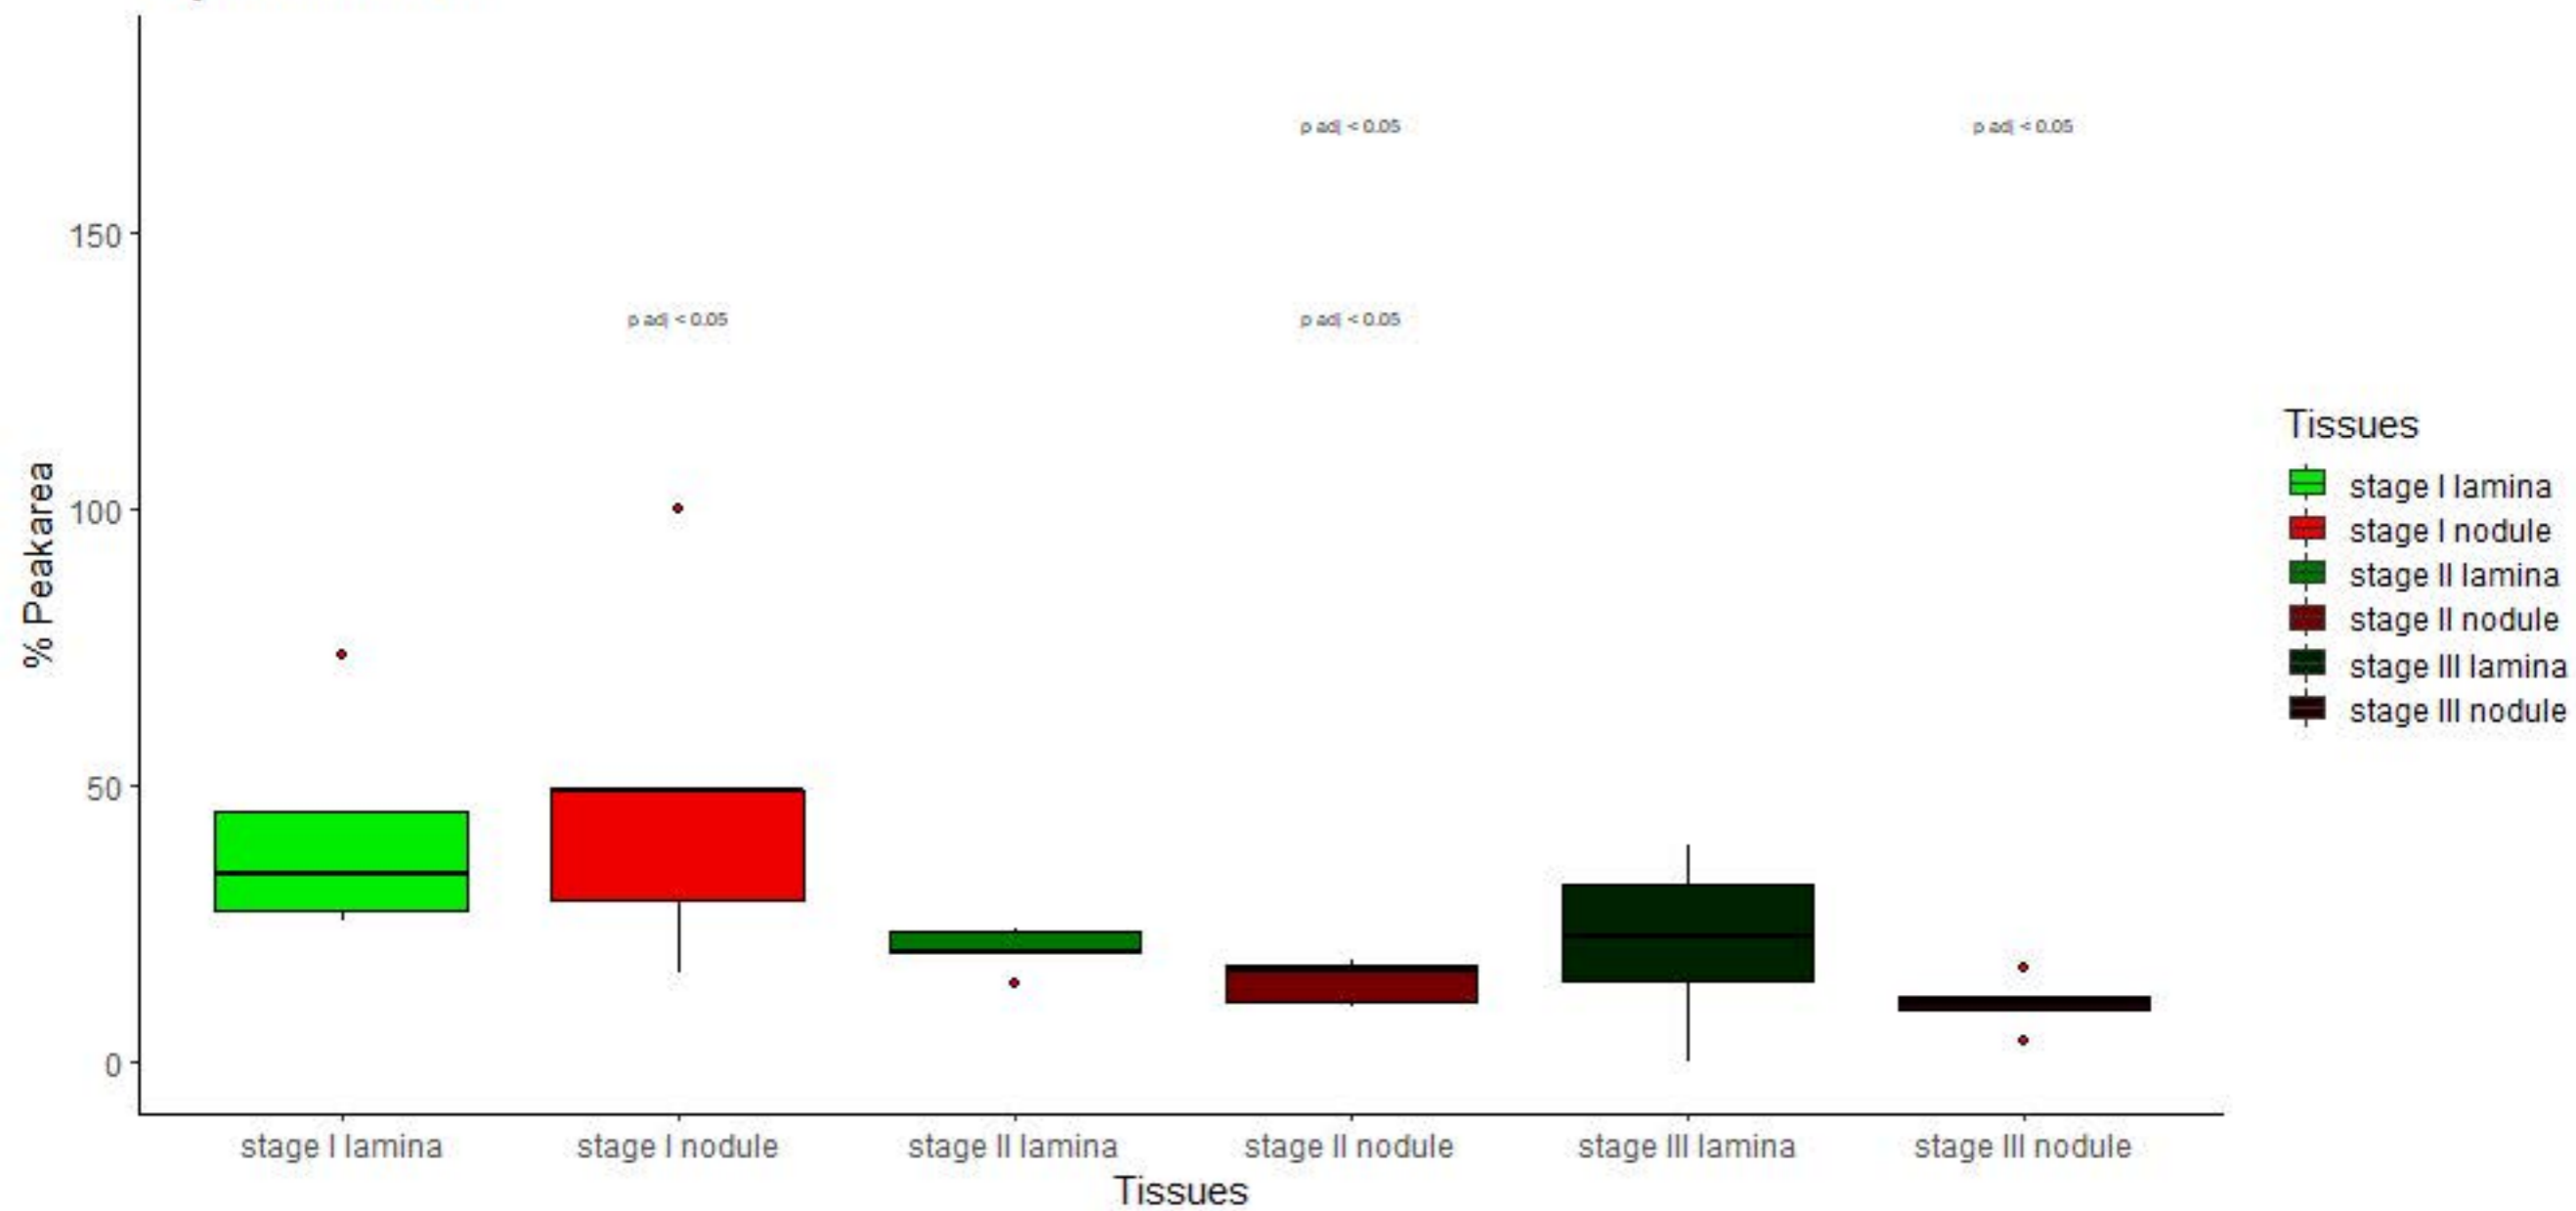

# Gluconic acid

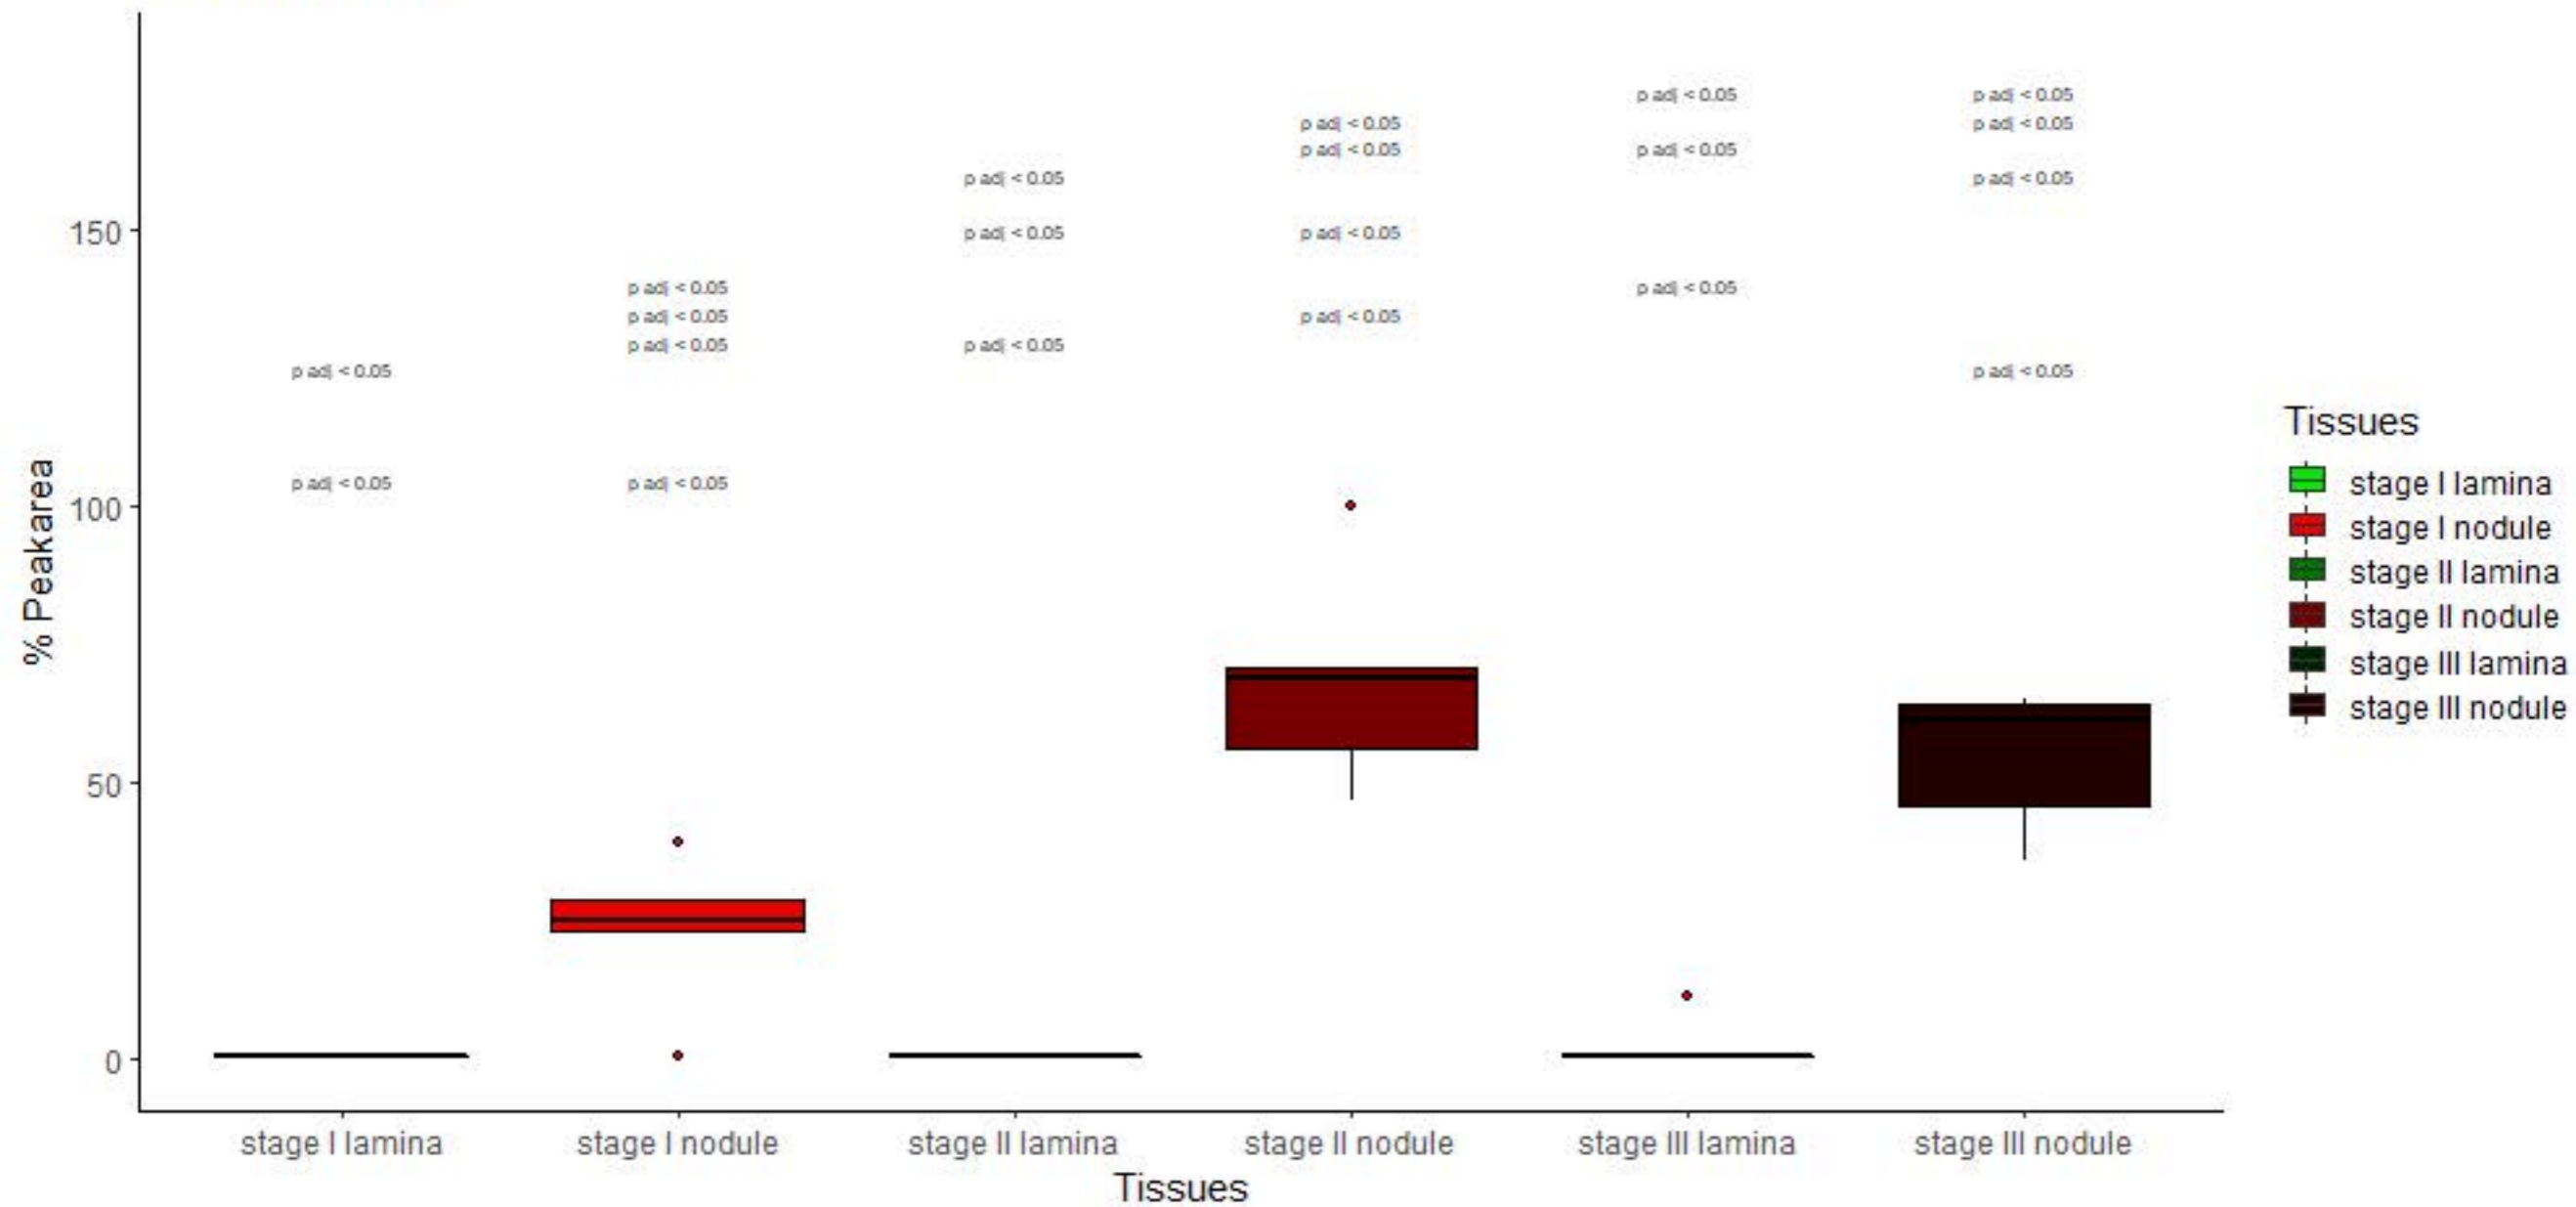

# ART Gluconic acid-1,5-lactone

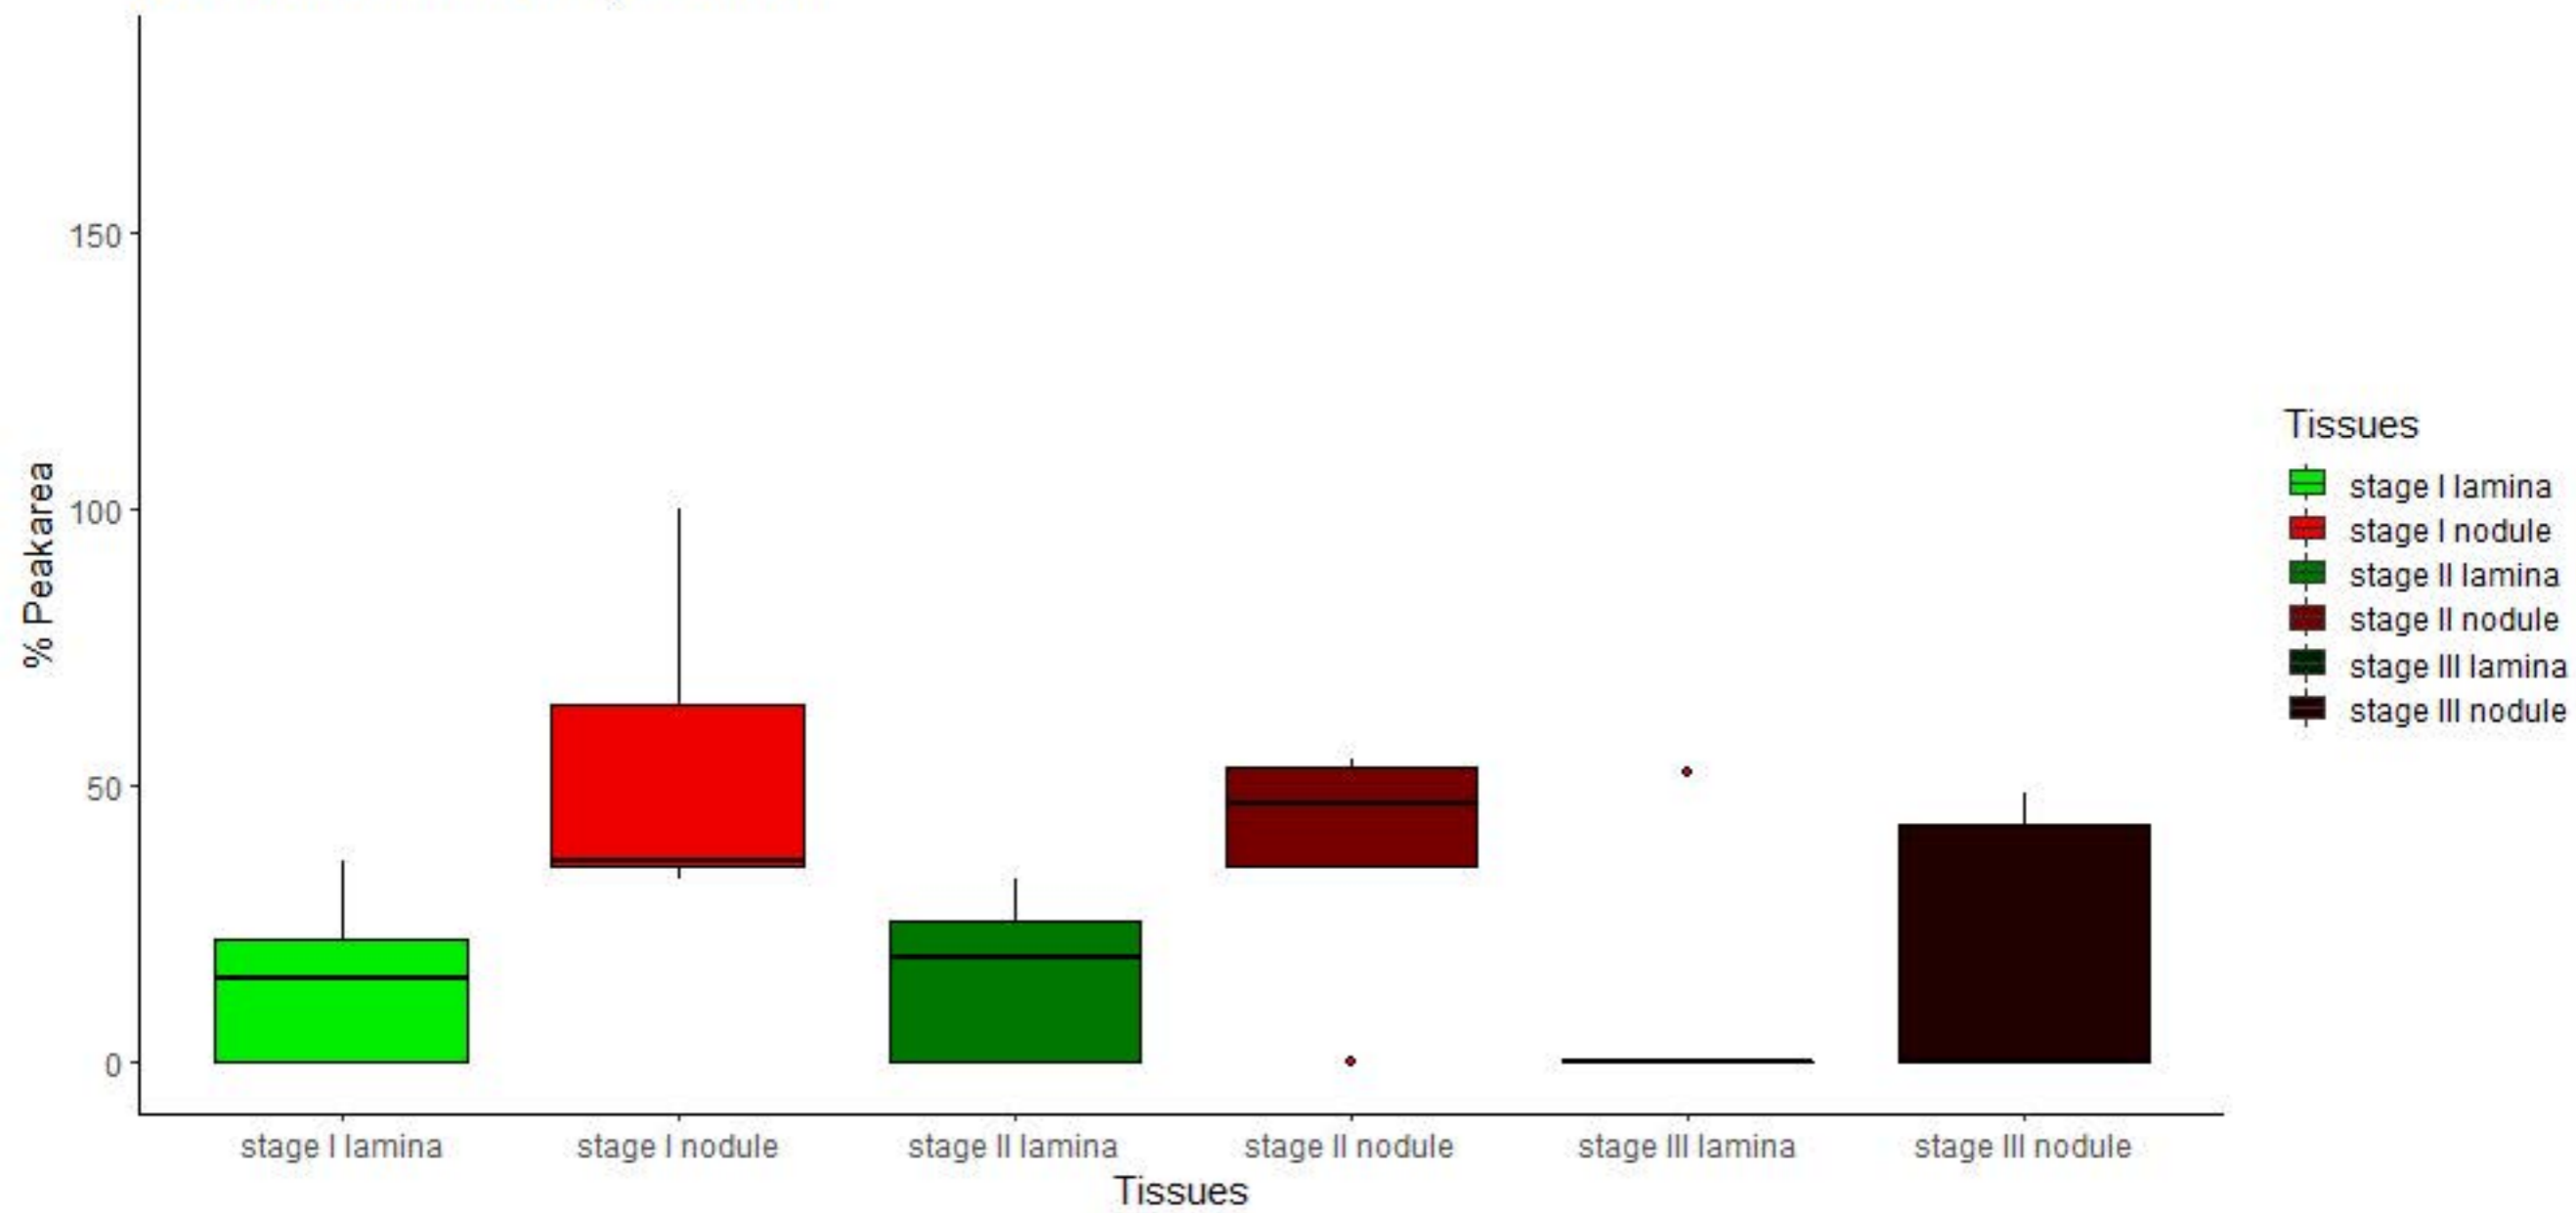

# Hexonic acid 2

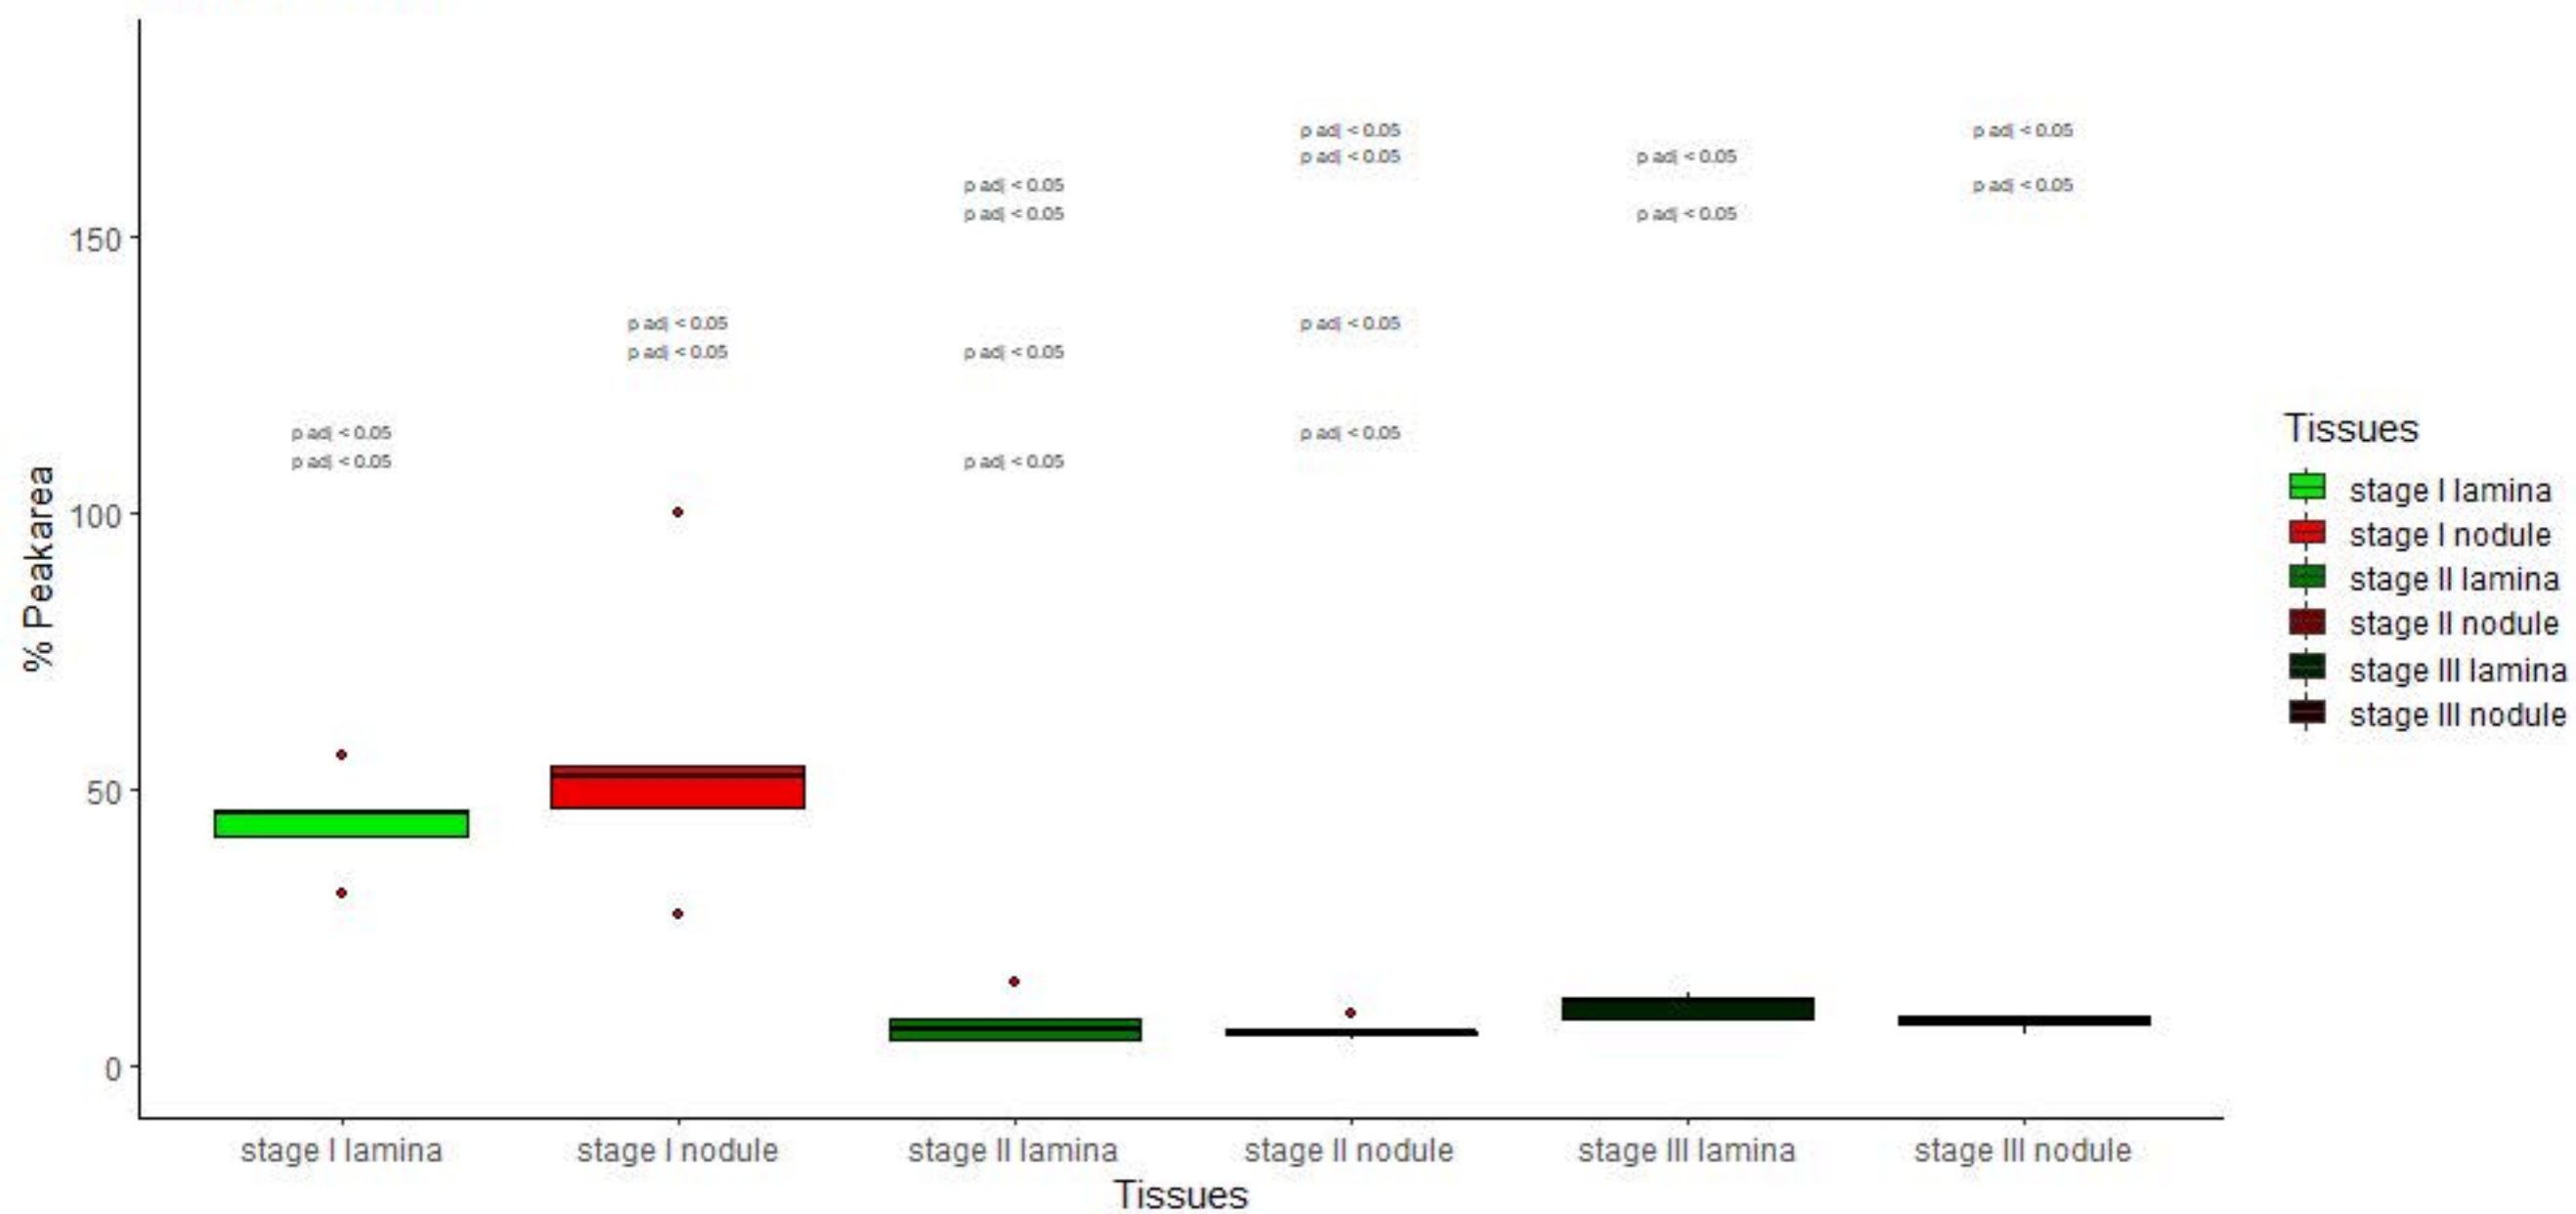

# Pentose RI1678

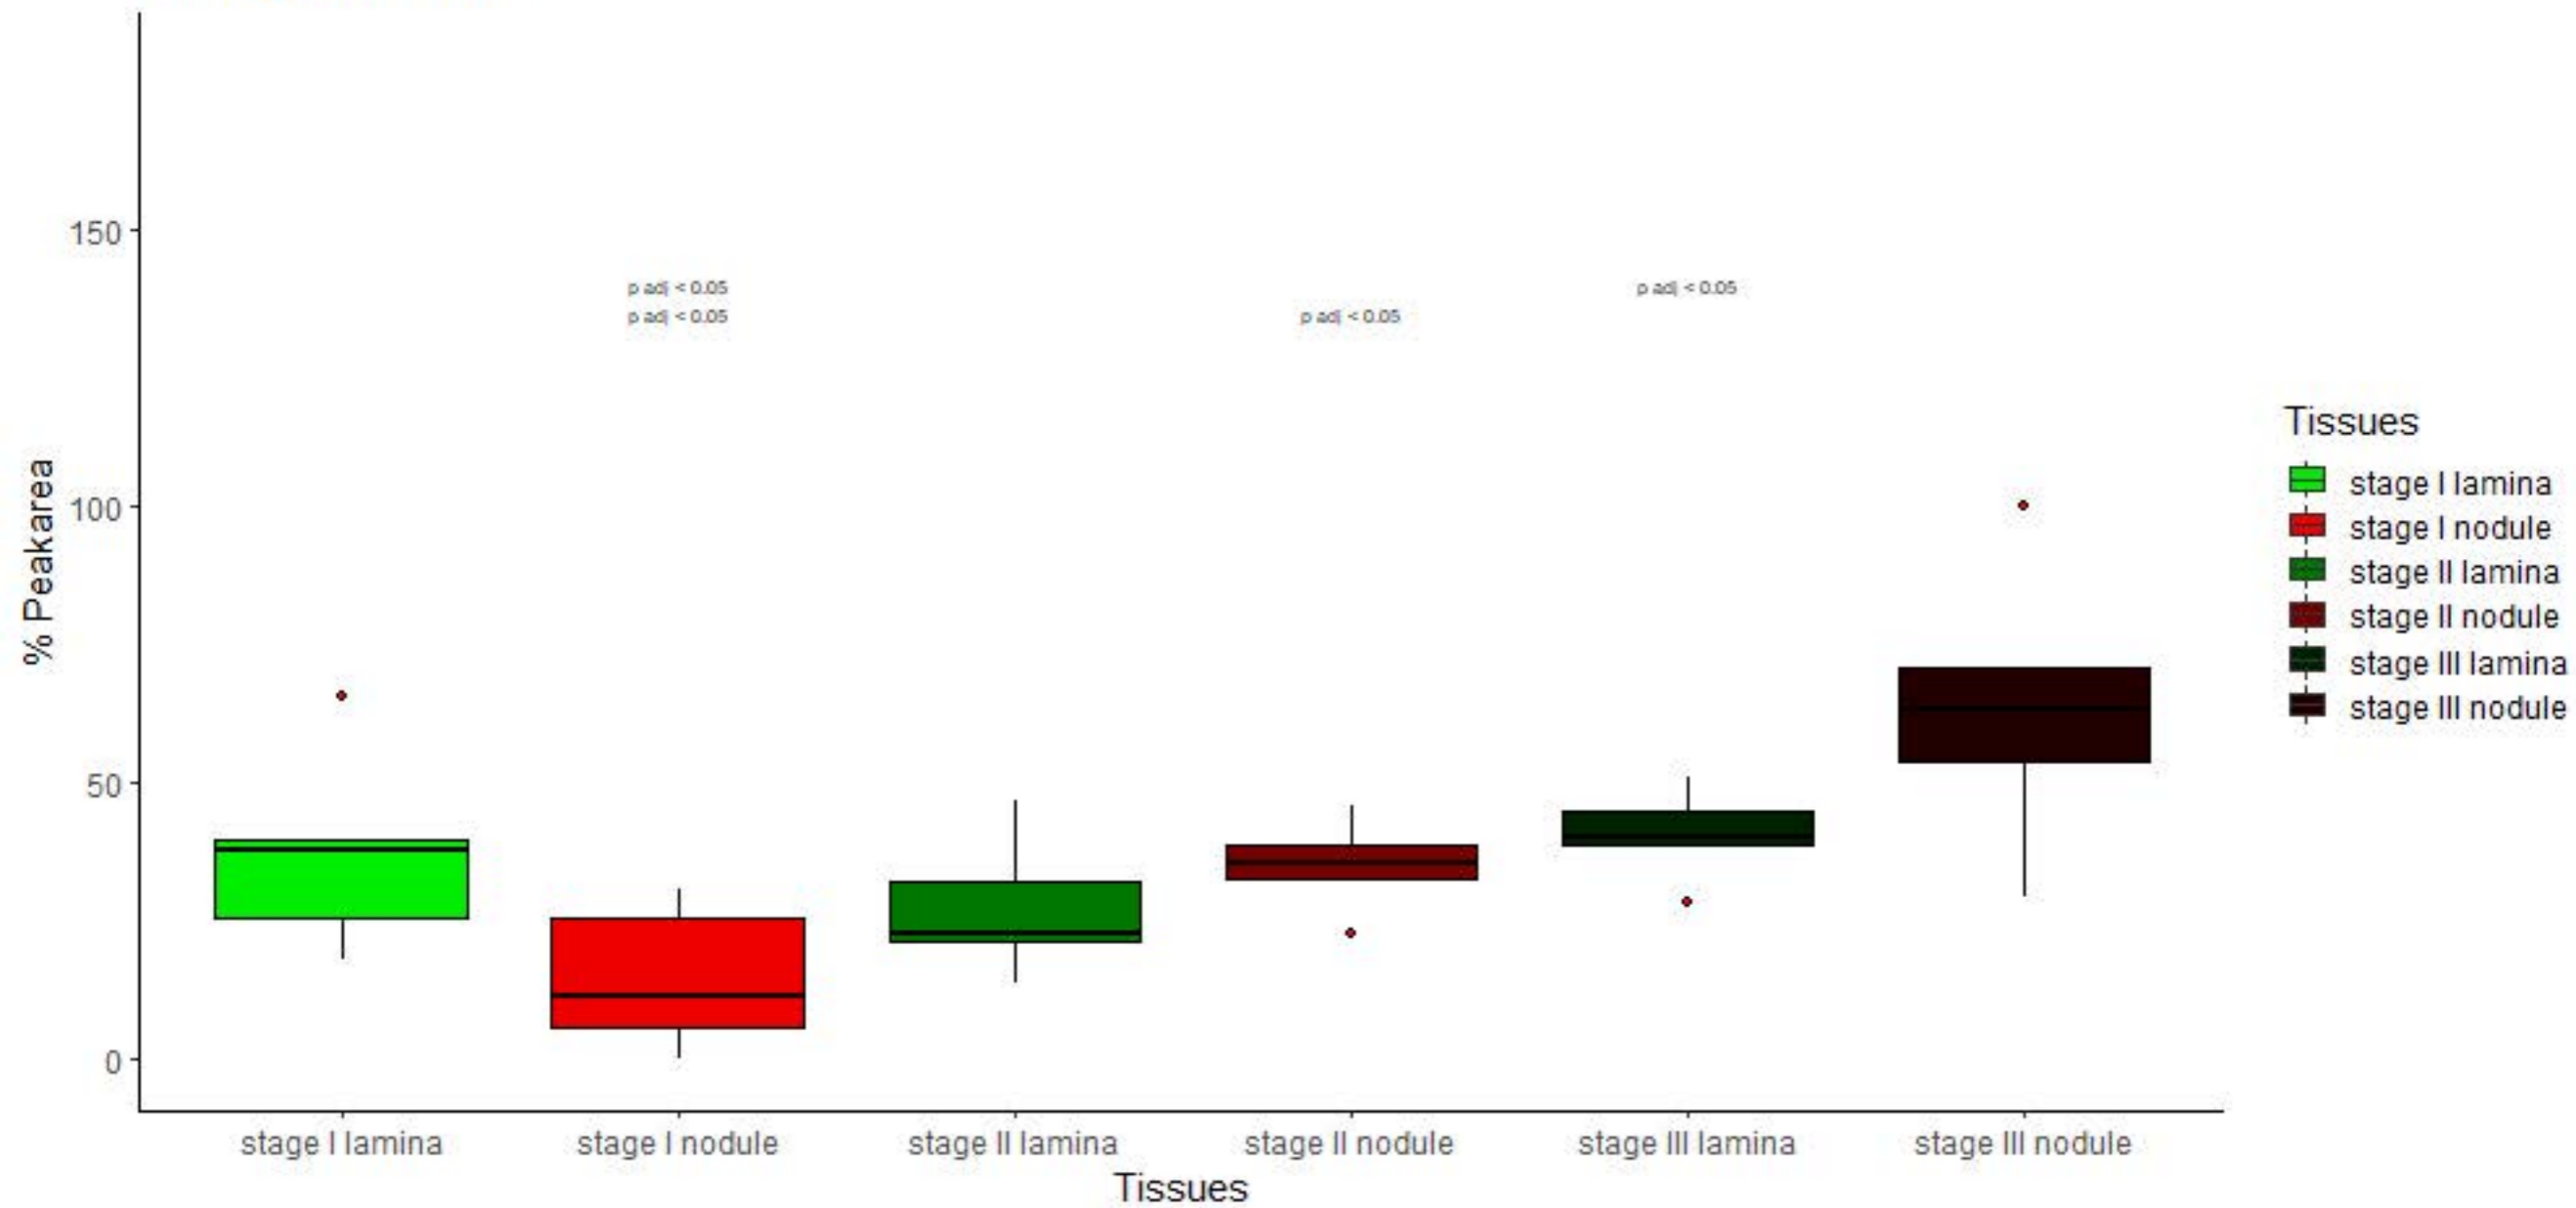

# Pentose RI1693

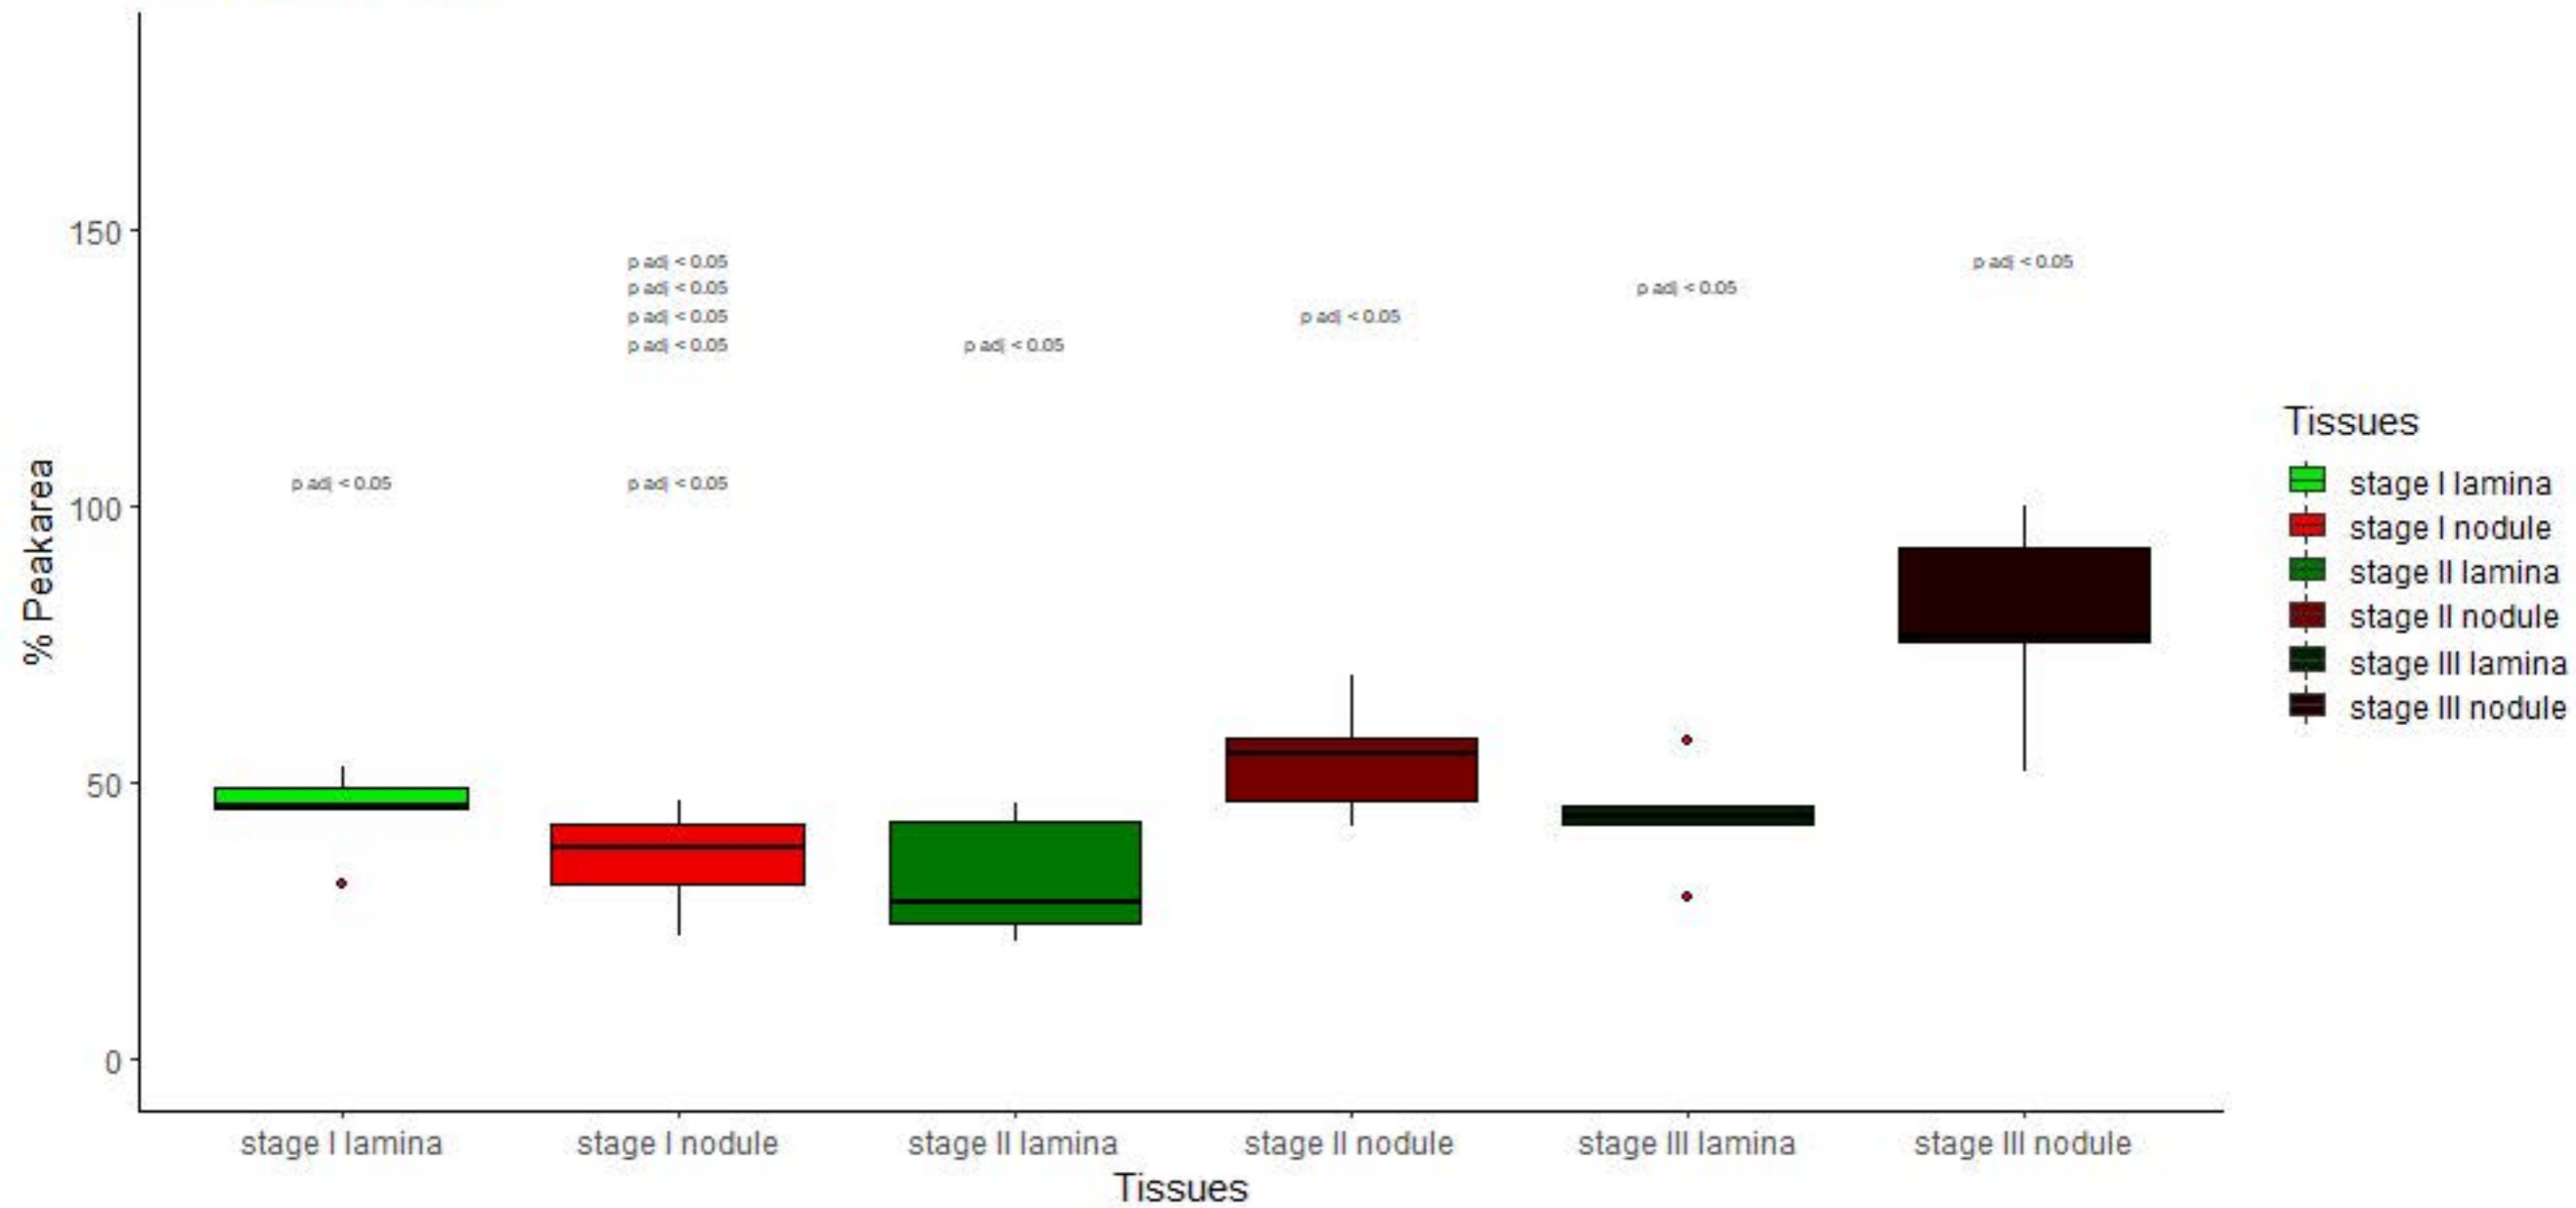



# Fructose

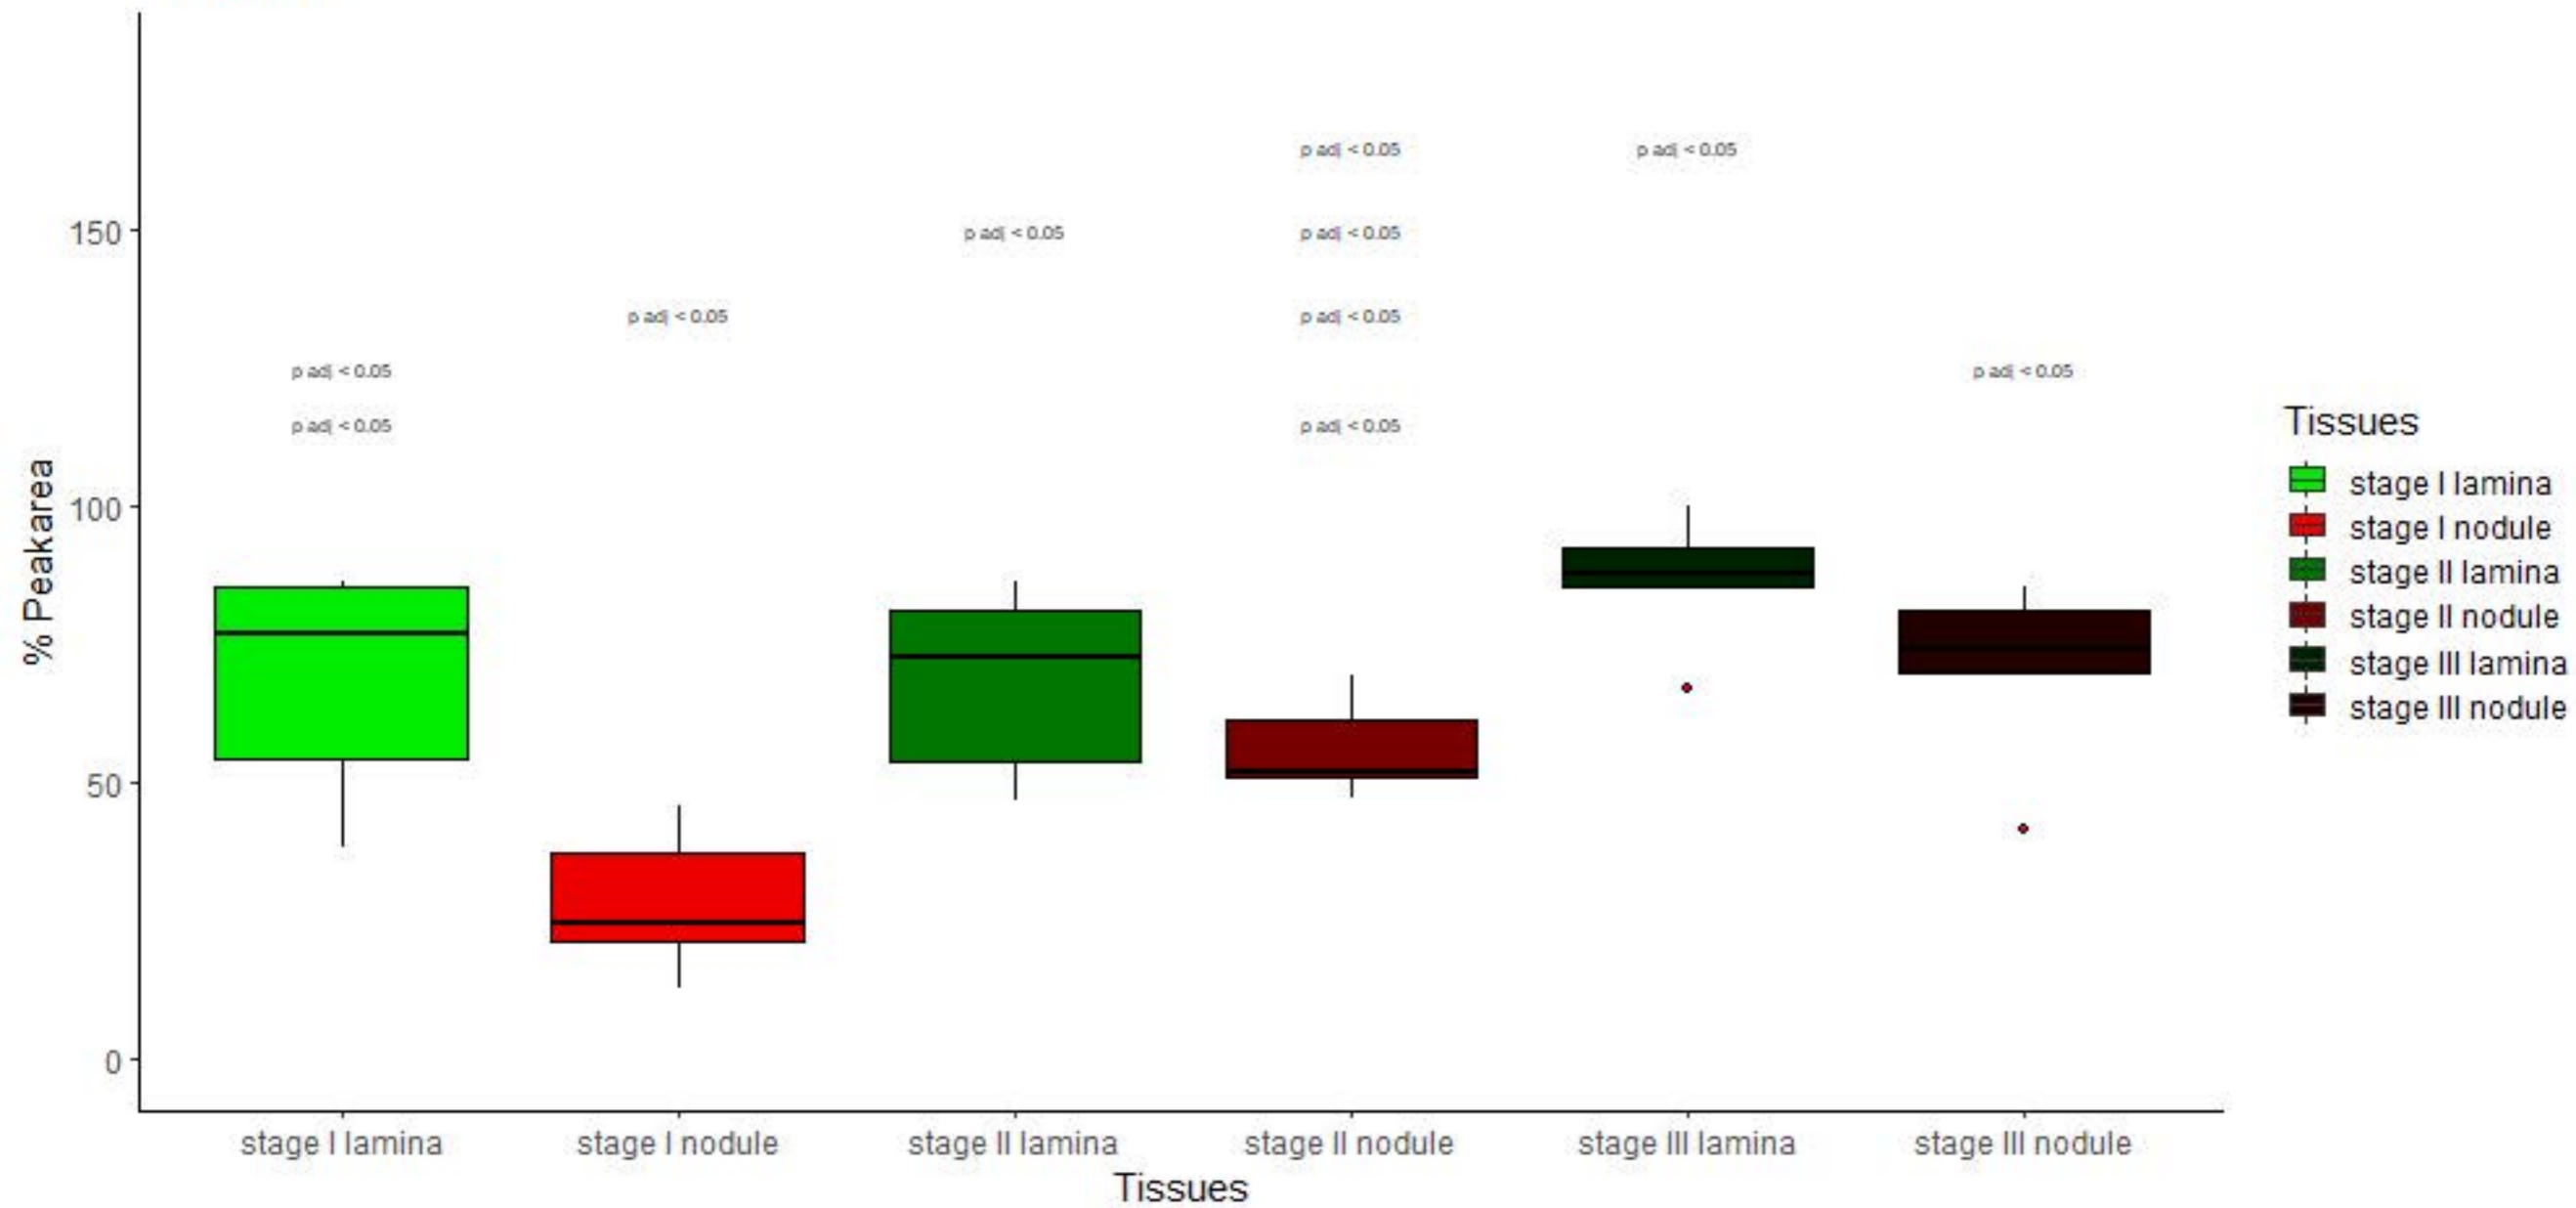

# Glucopyranose [-H20]

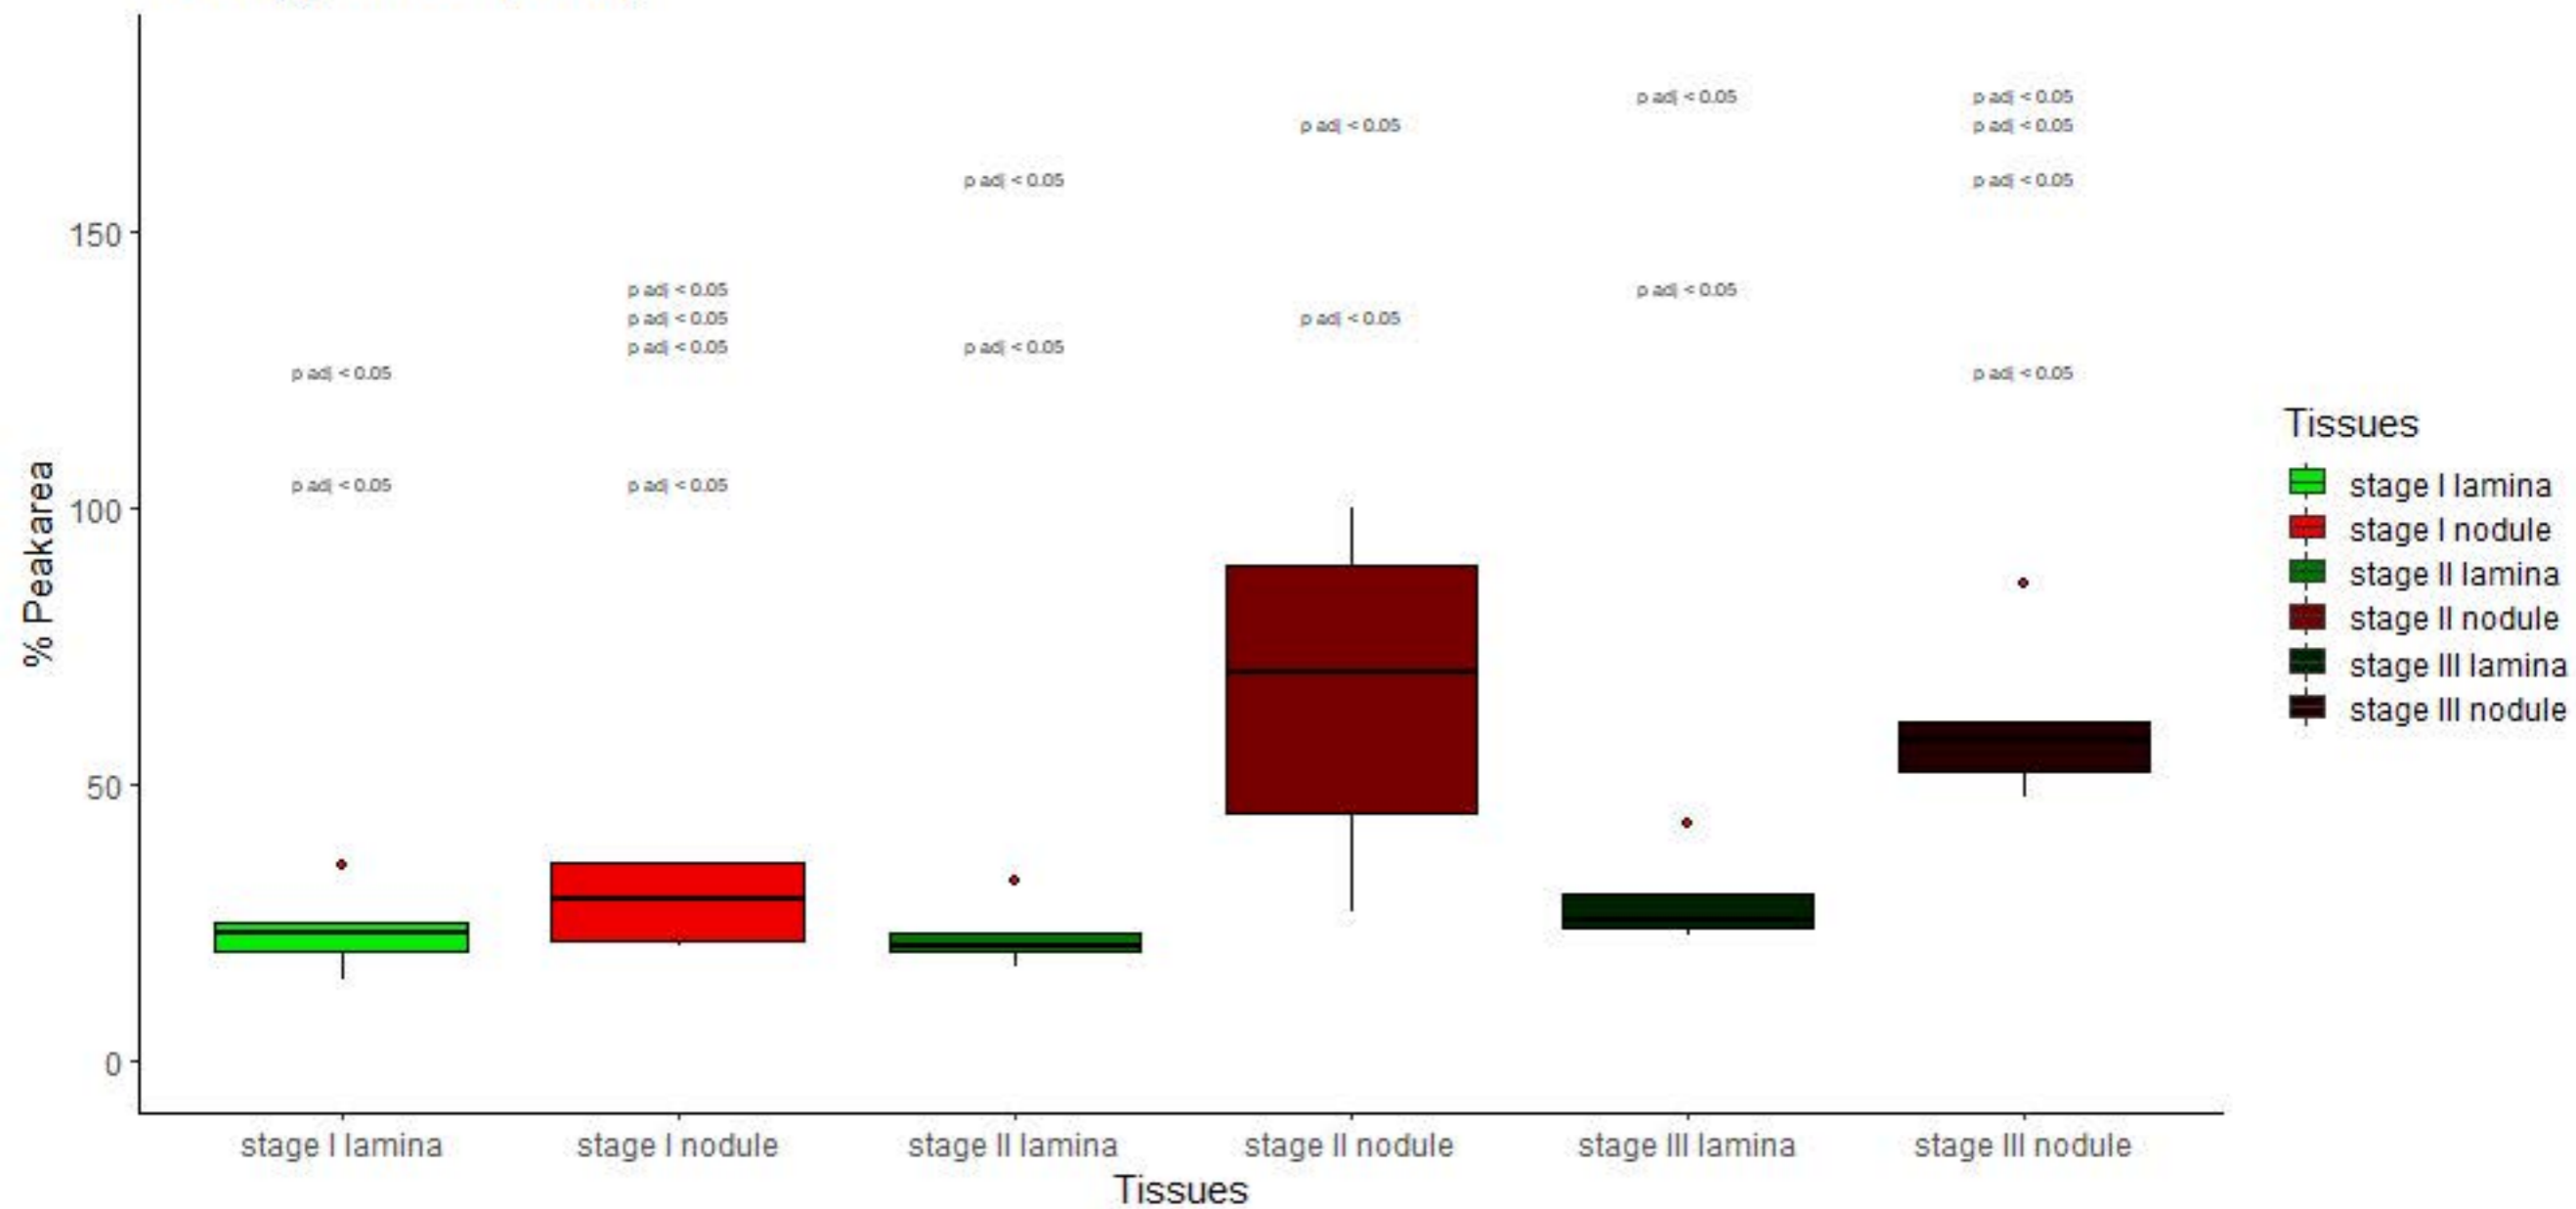

# Galactose

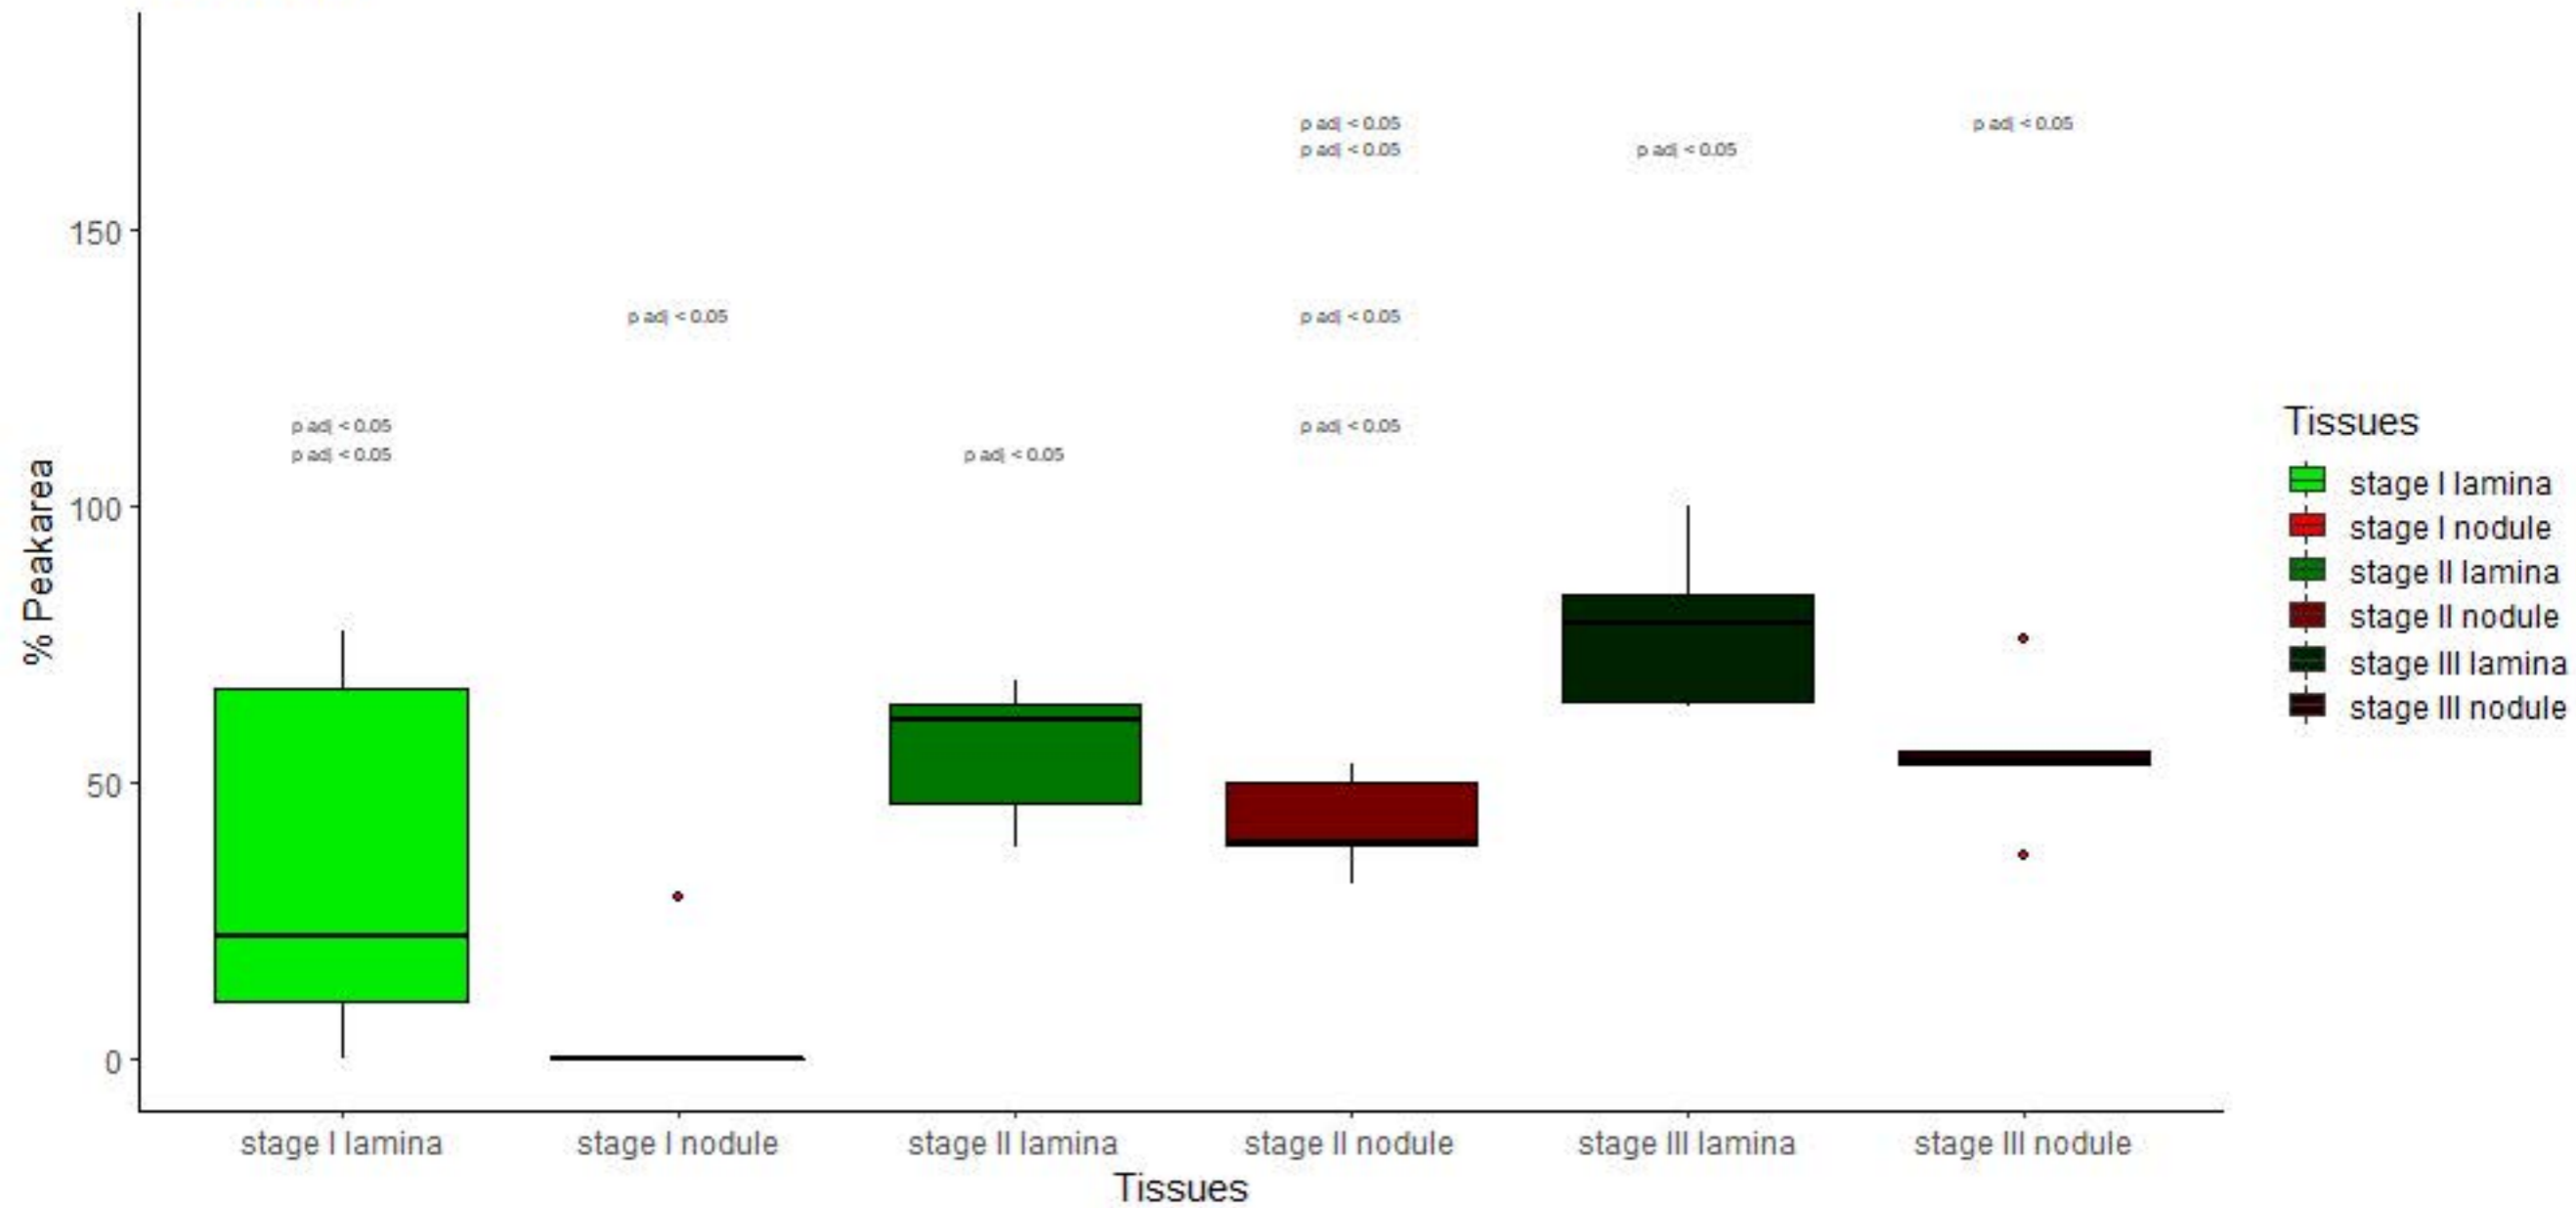

# Sucrose S50

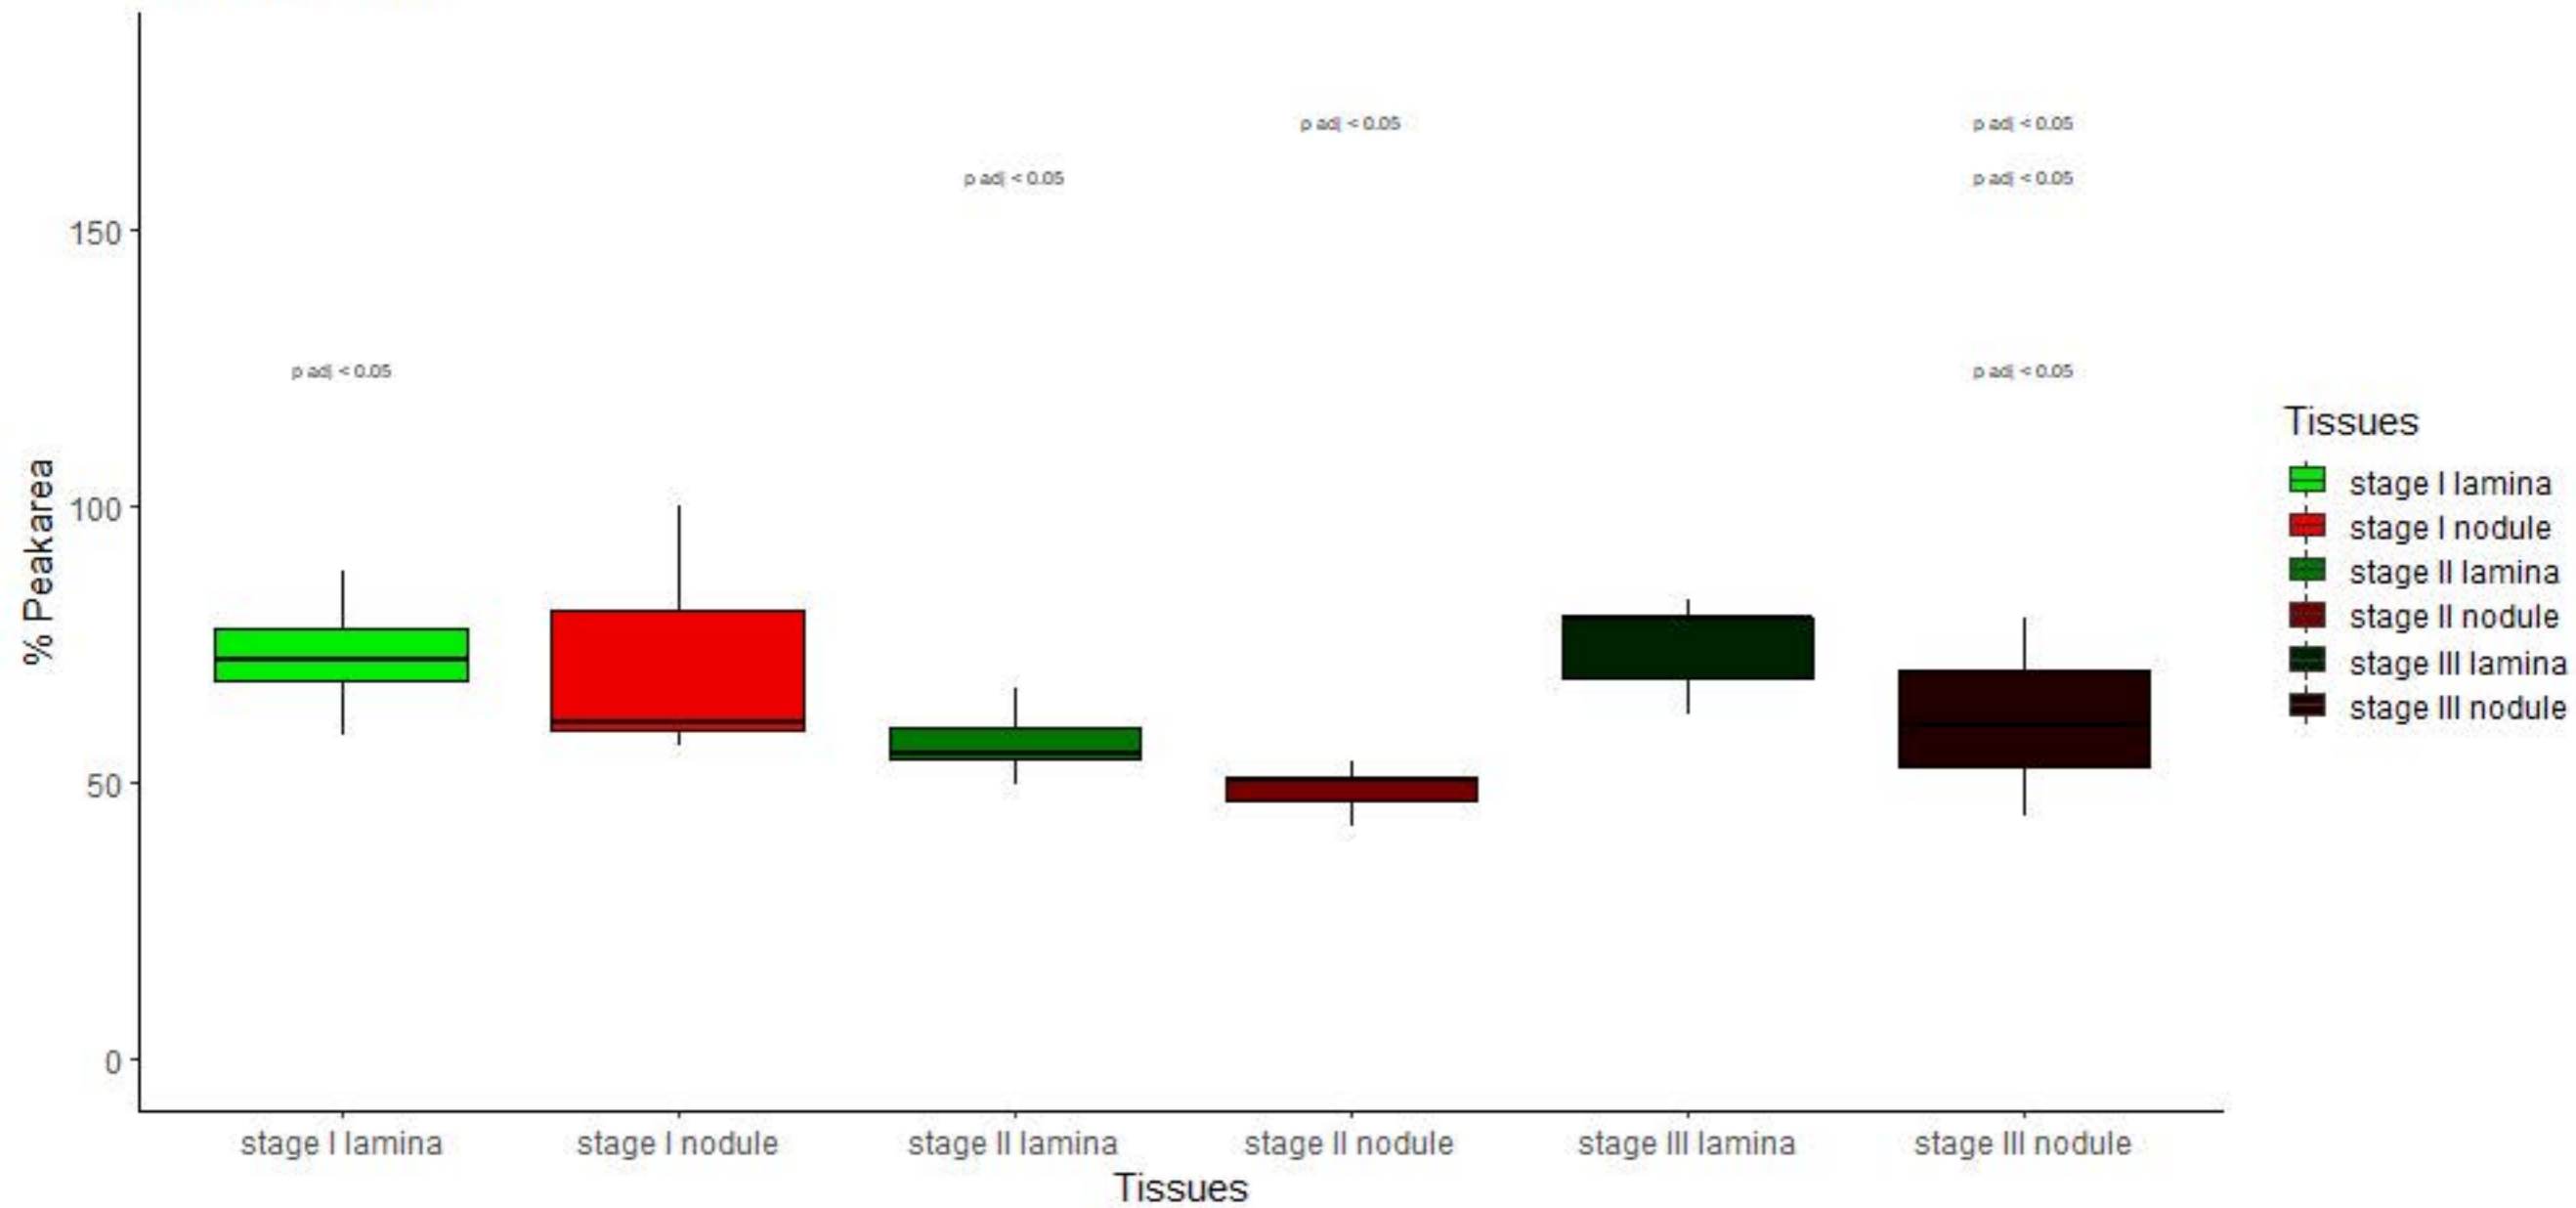

# Maltose

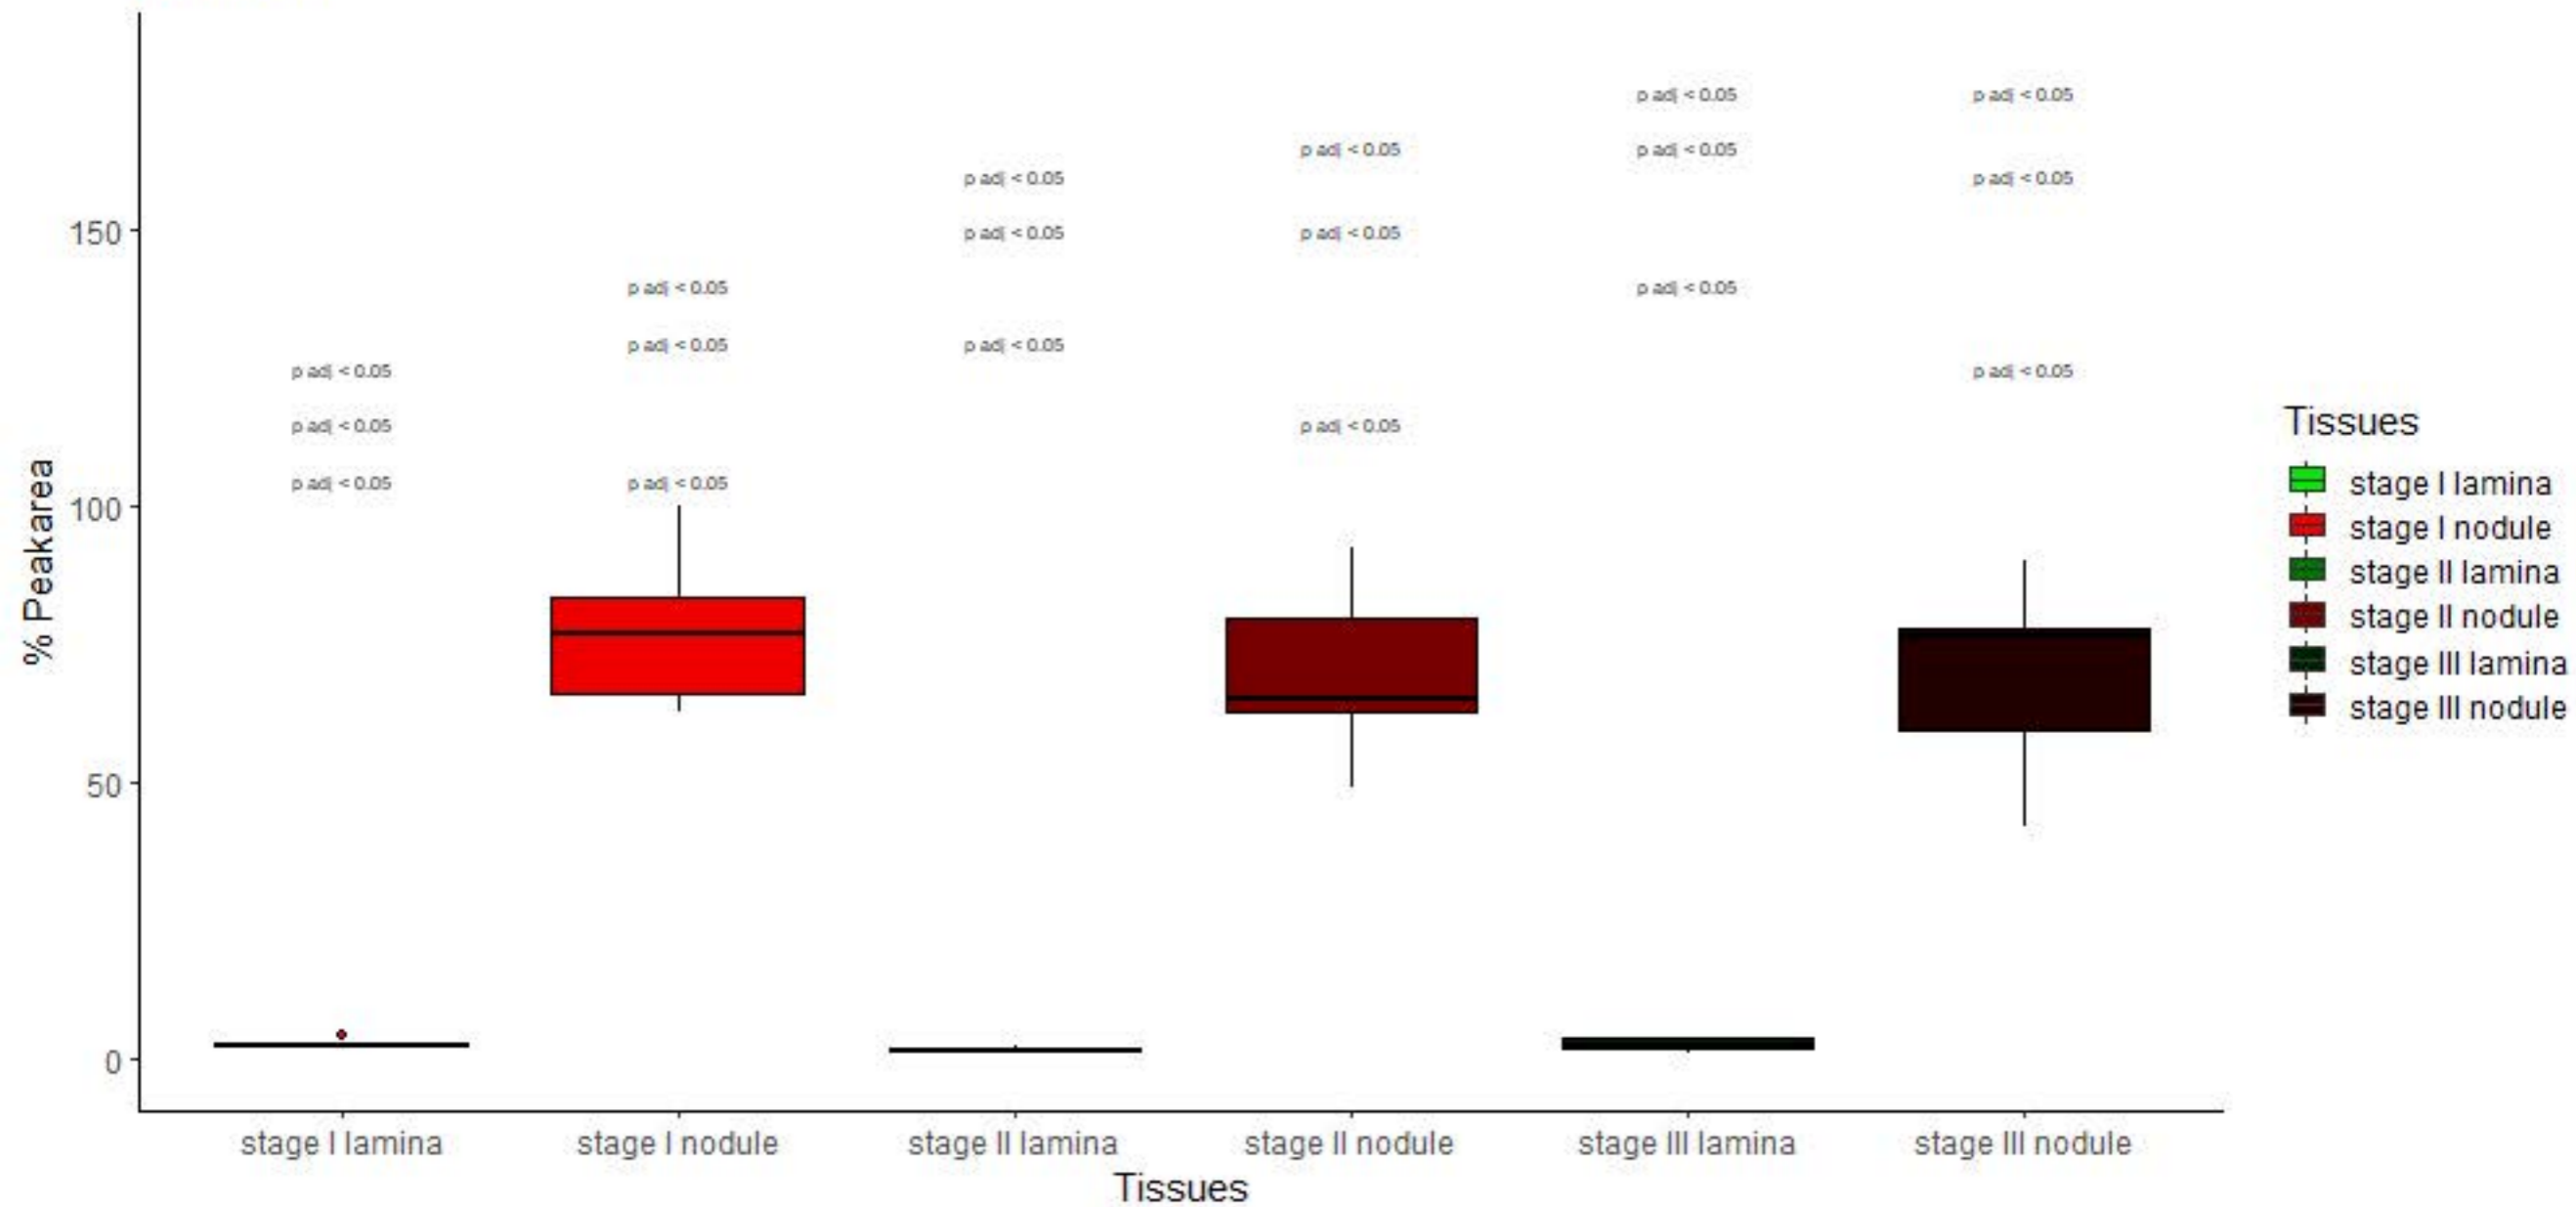

# Trehalose S50

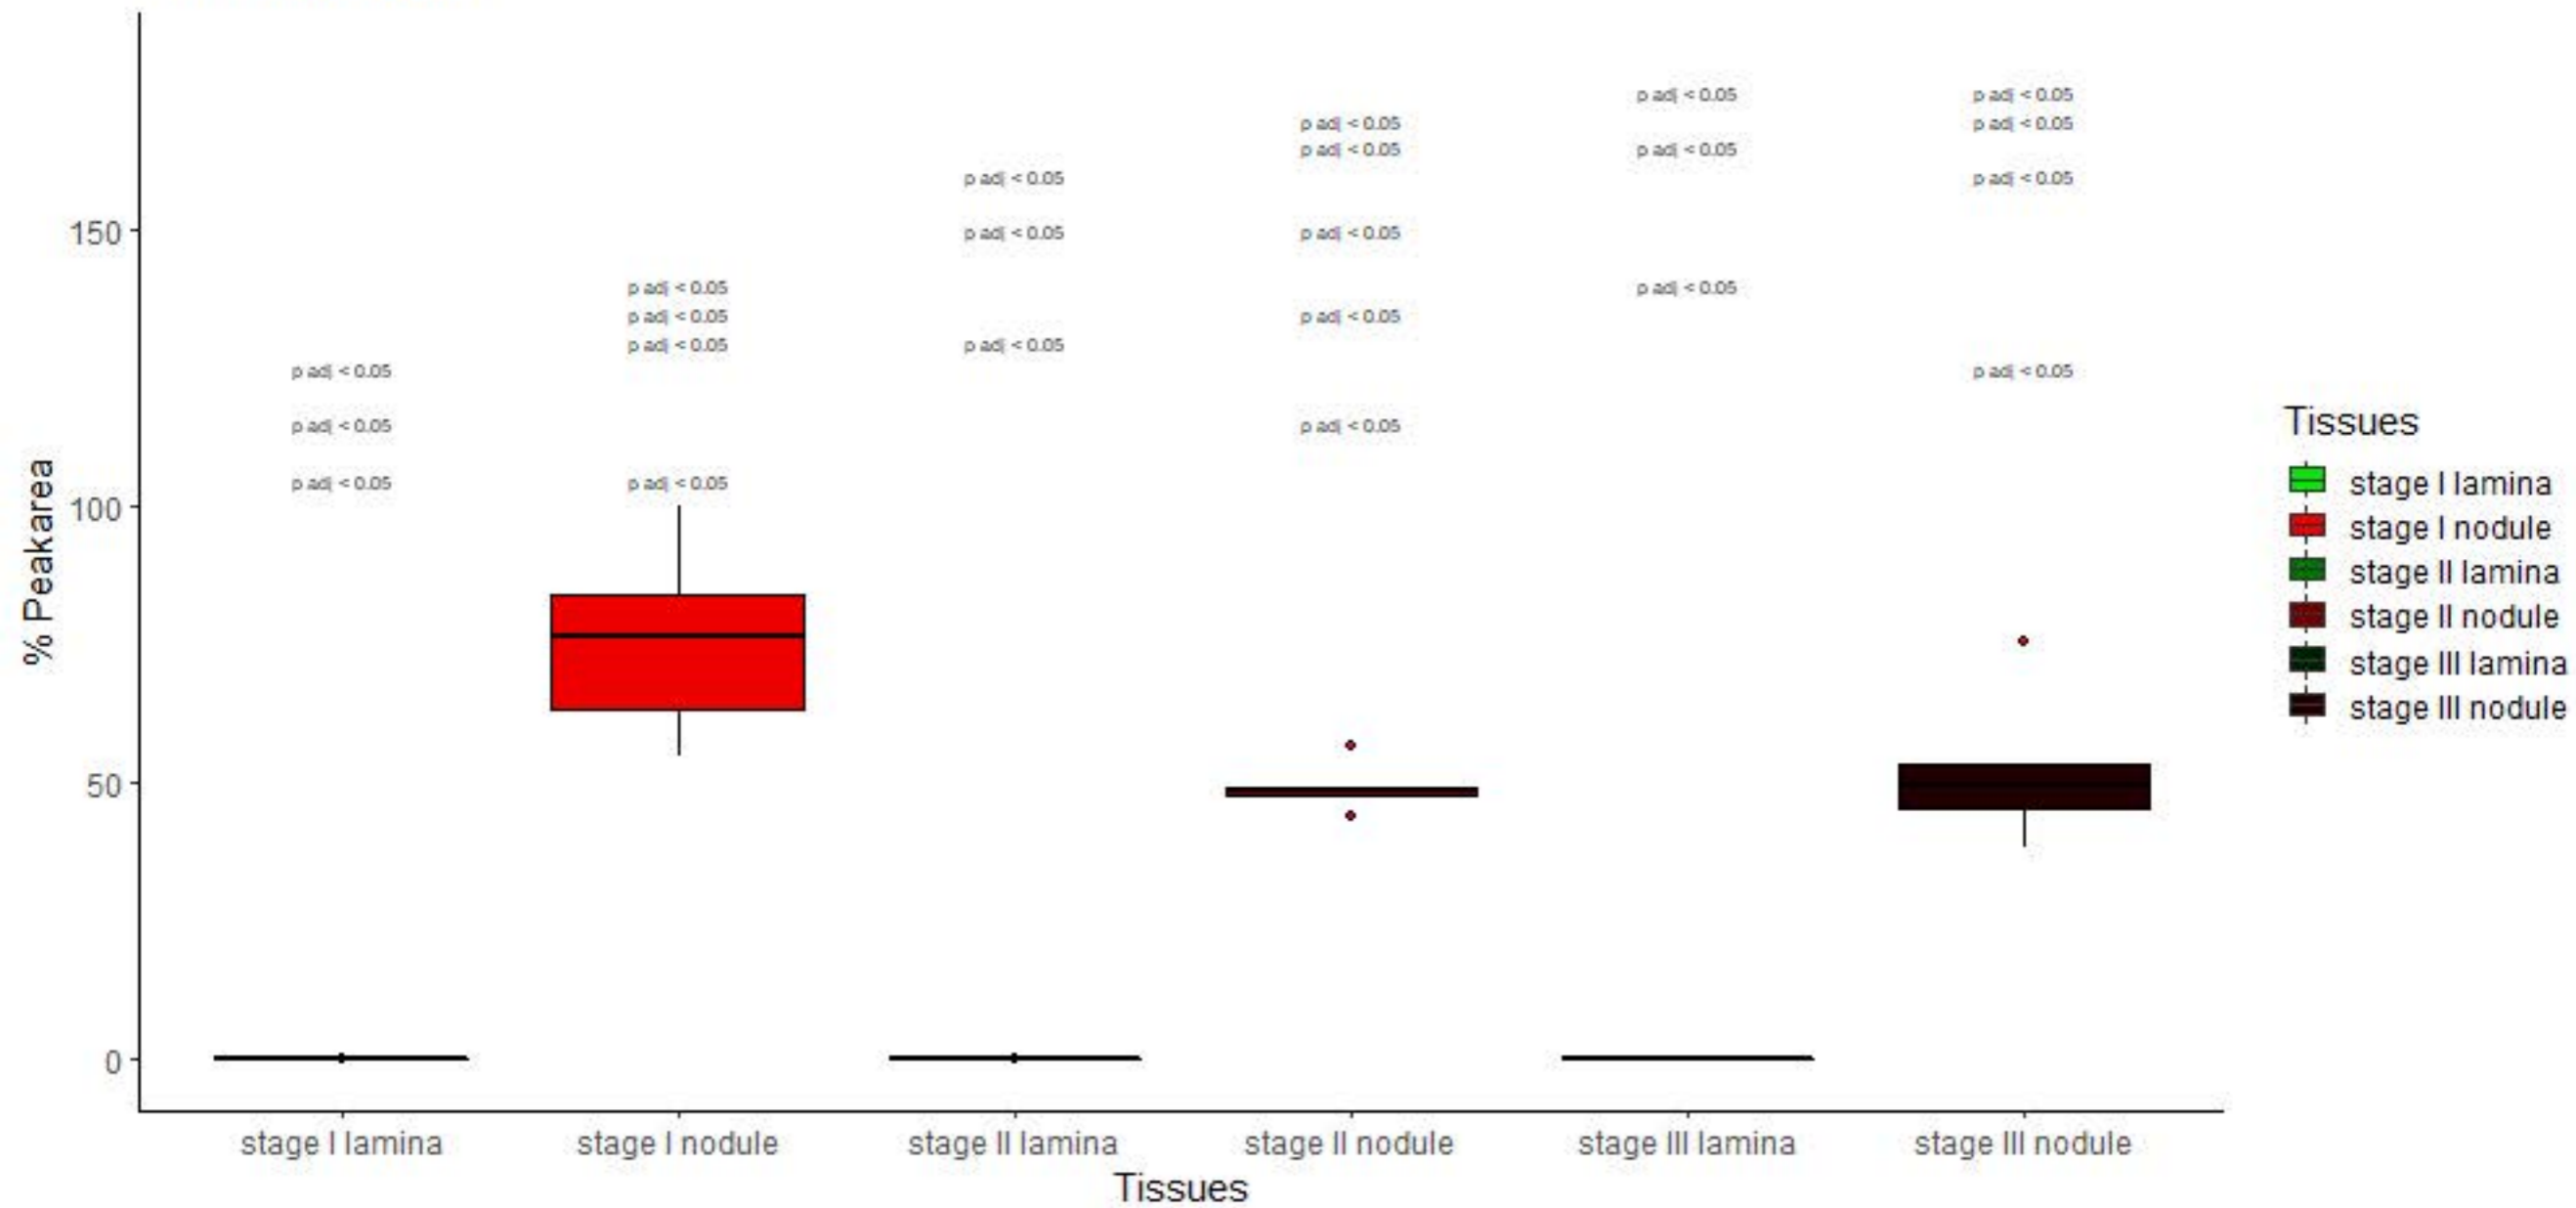

# Rhamnose/Fucose Product

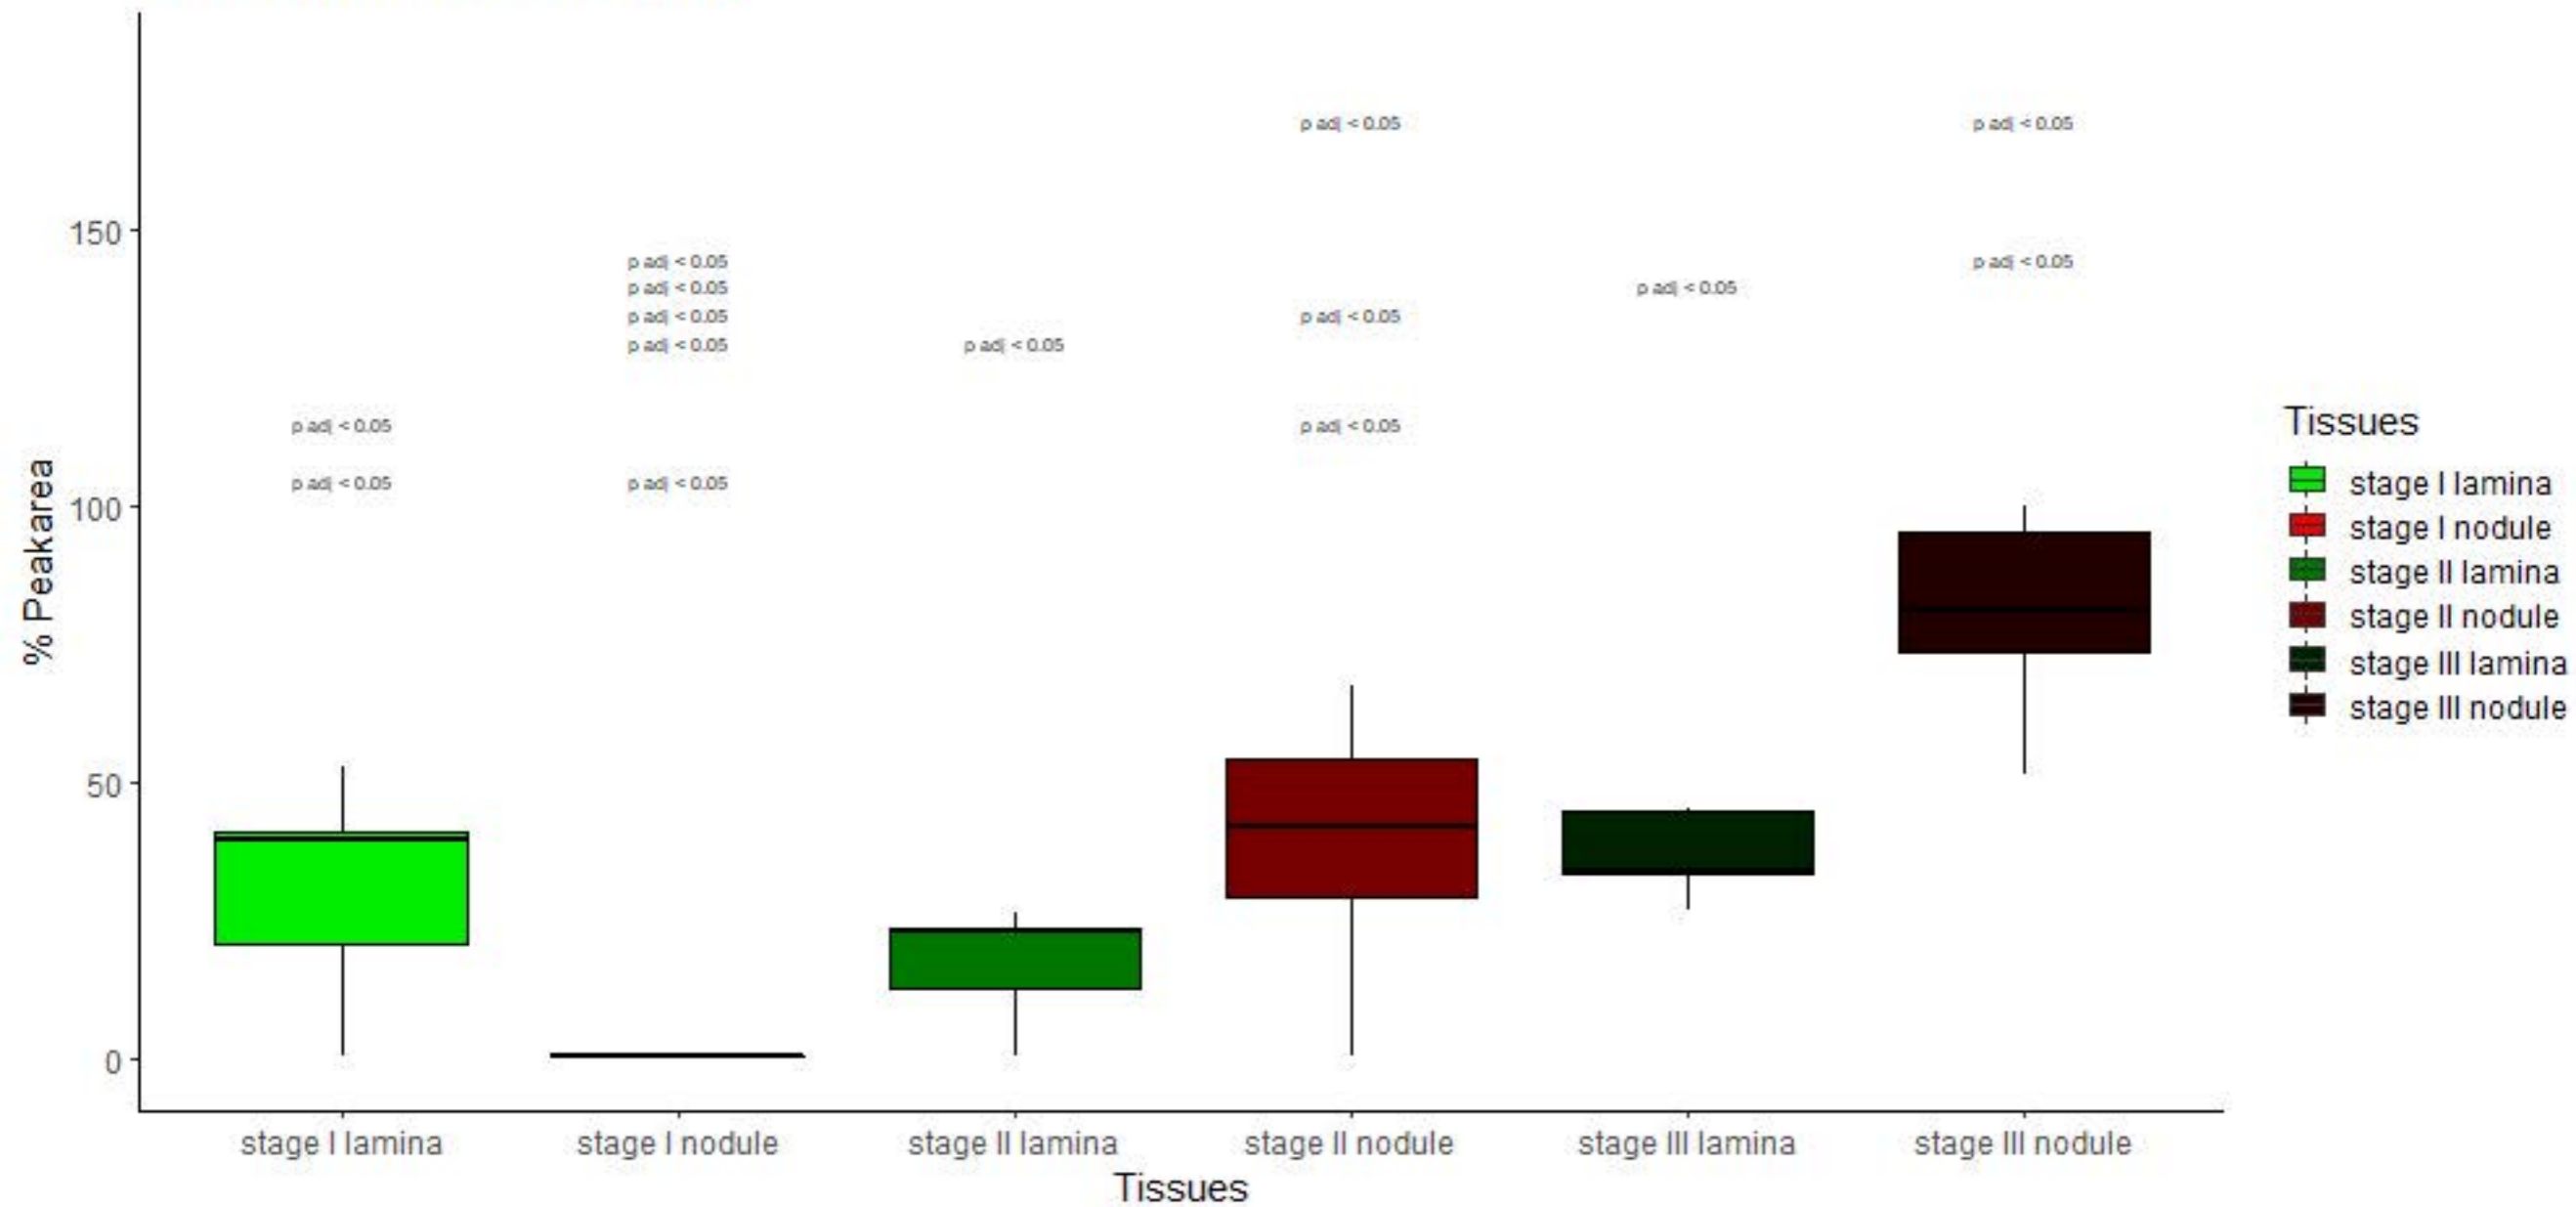

# Glycerol

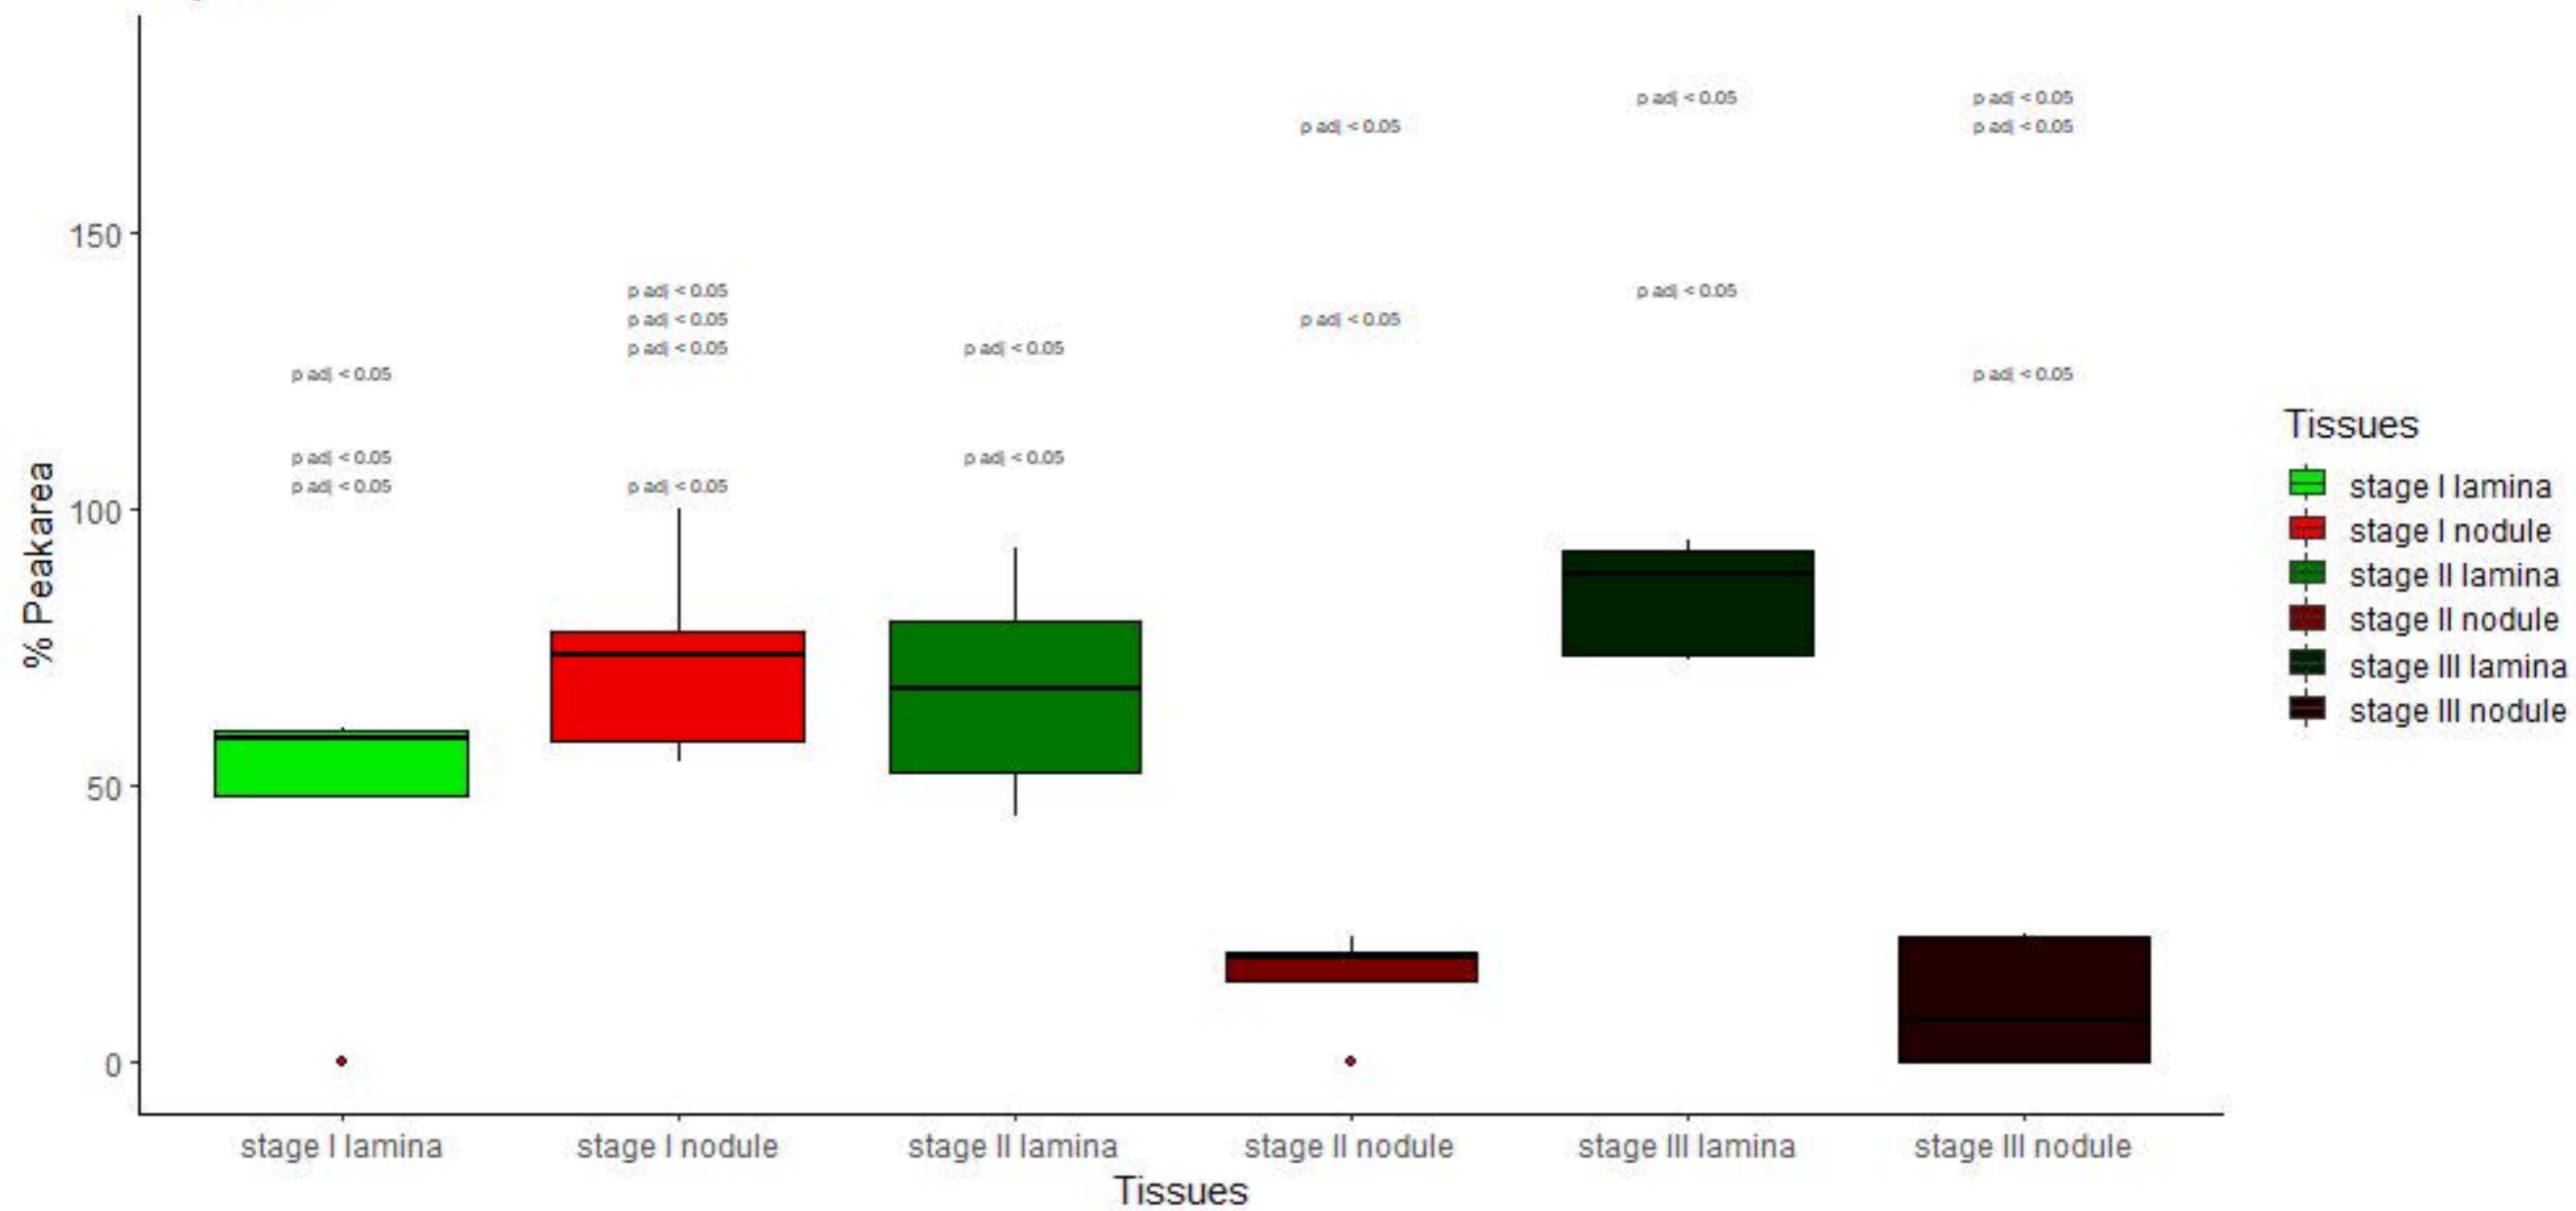



# Glycerol-3-phosphate

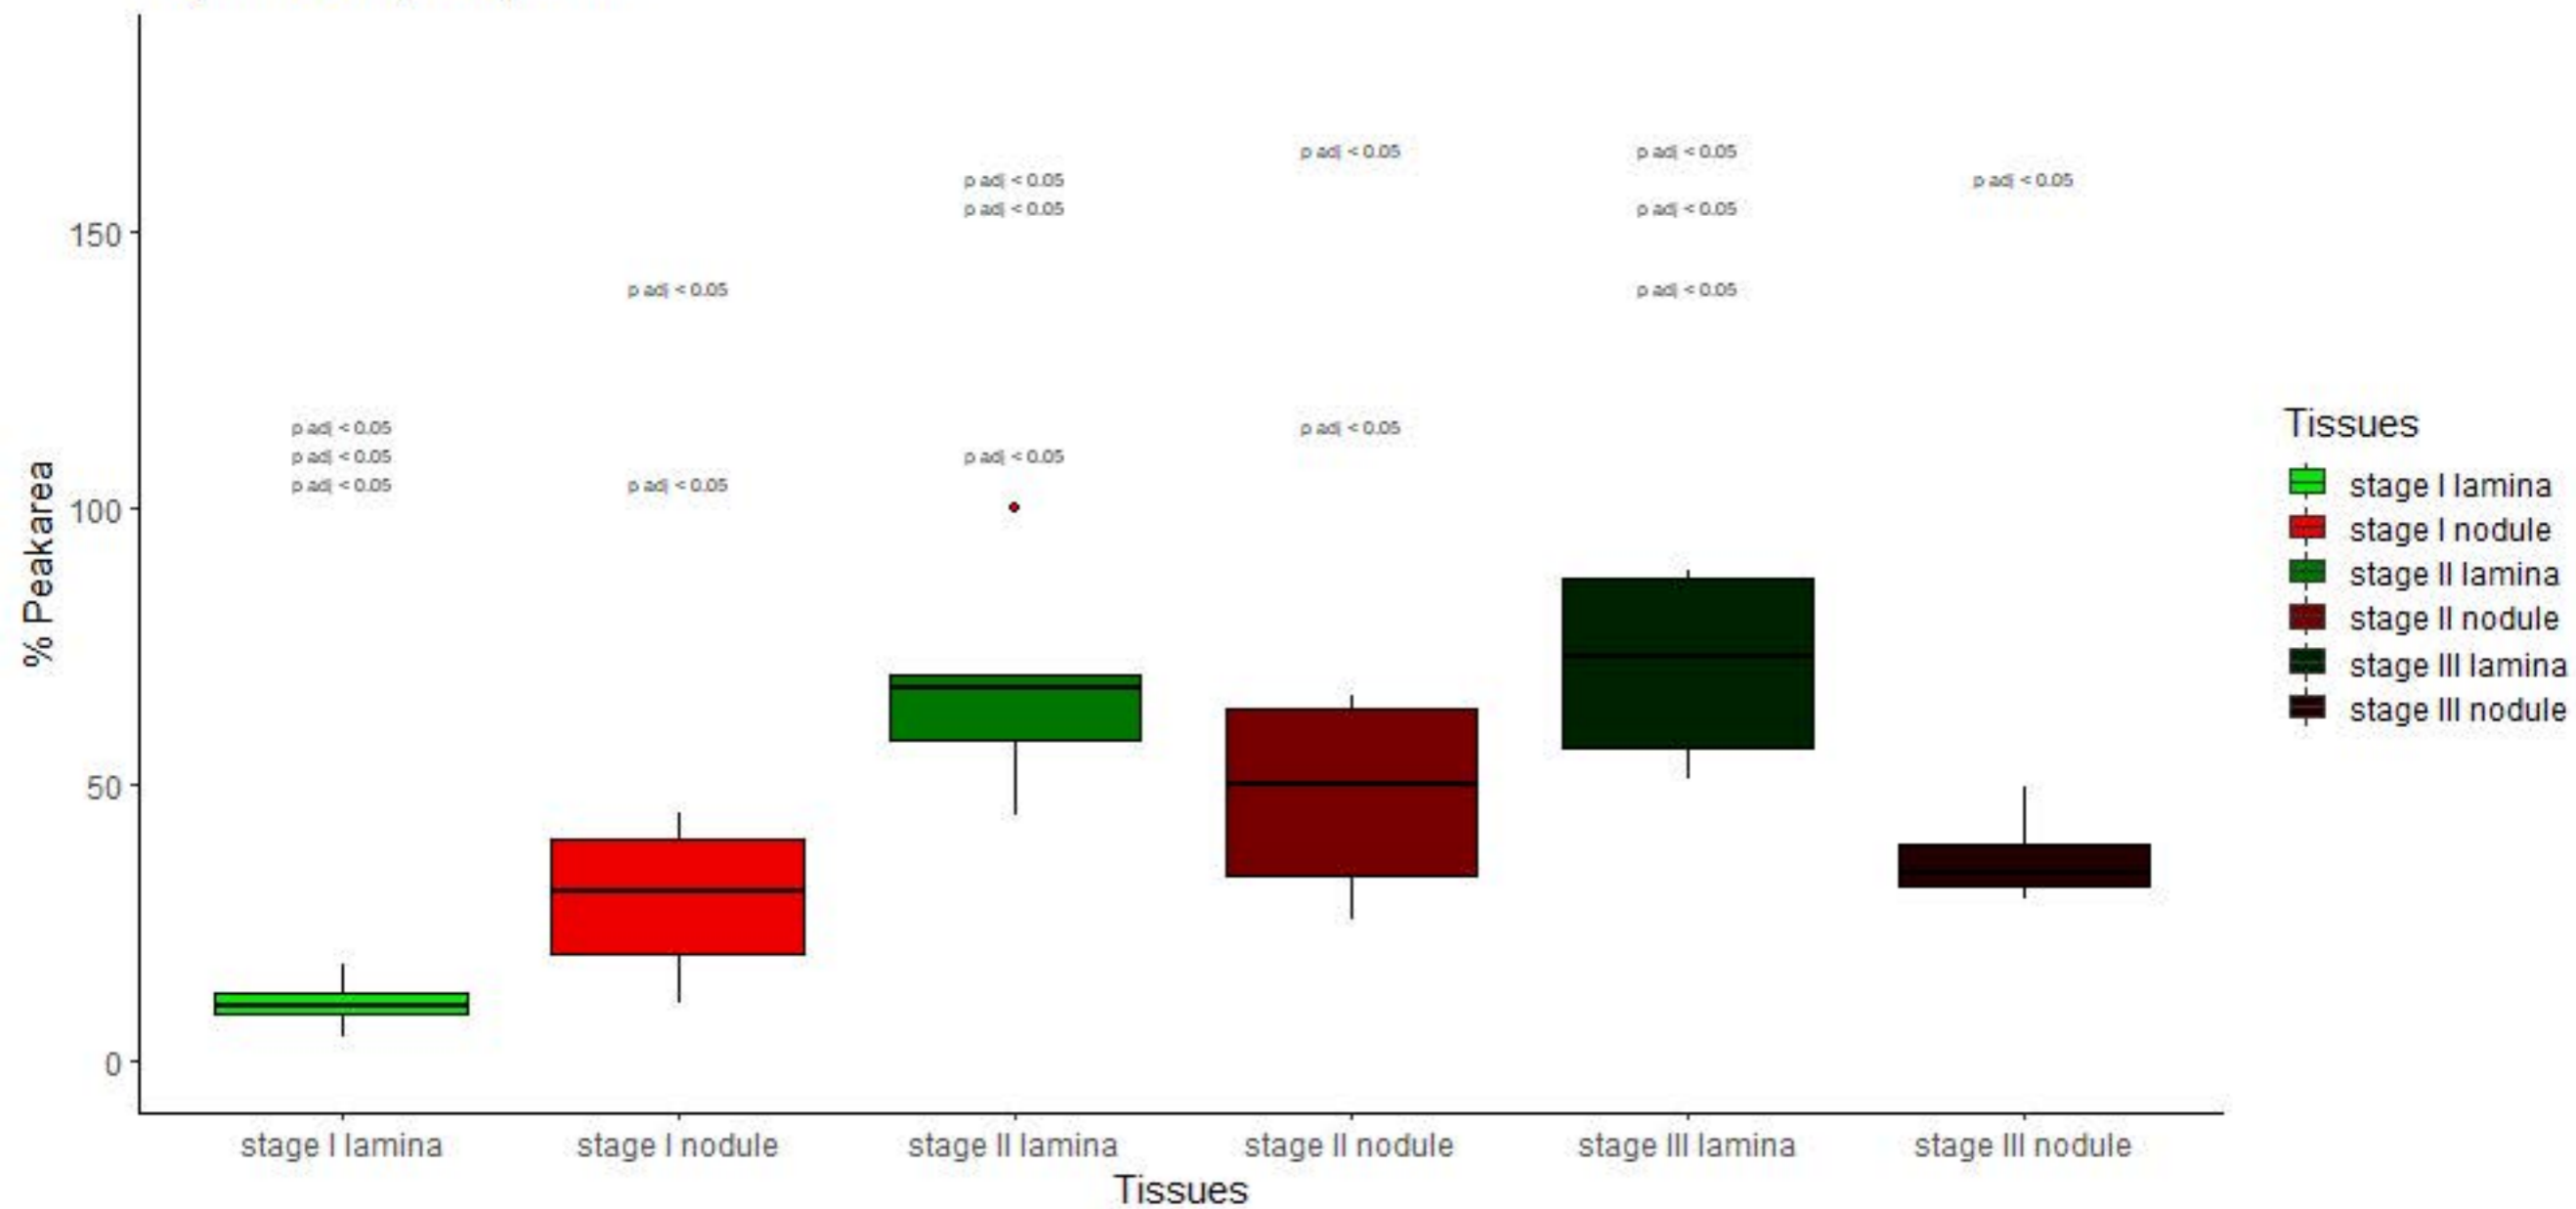

# Galactinol

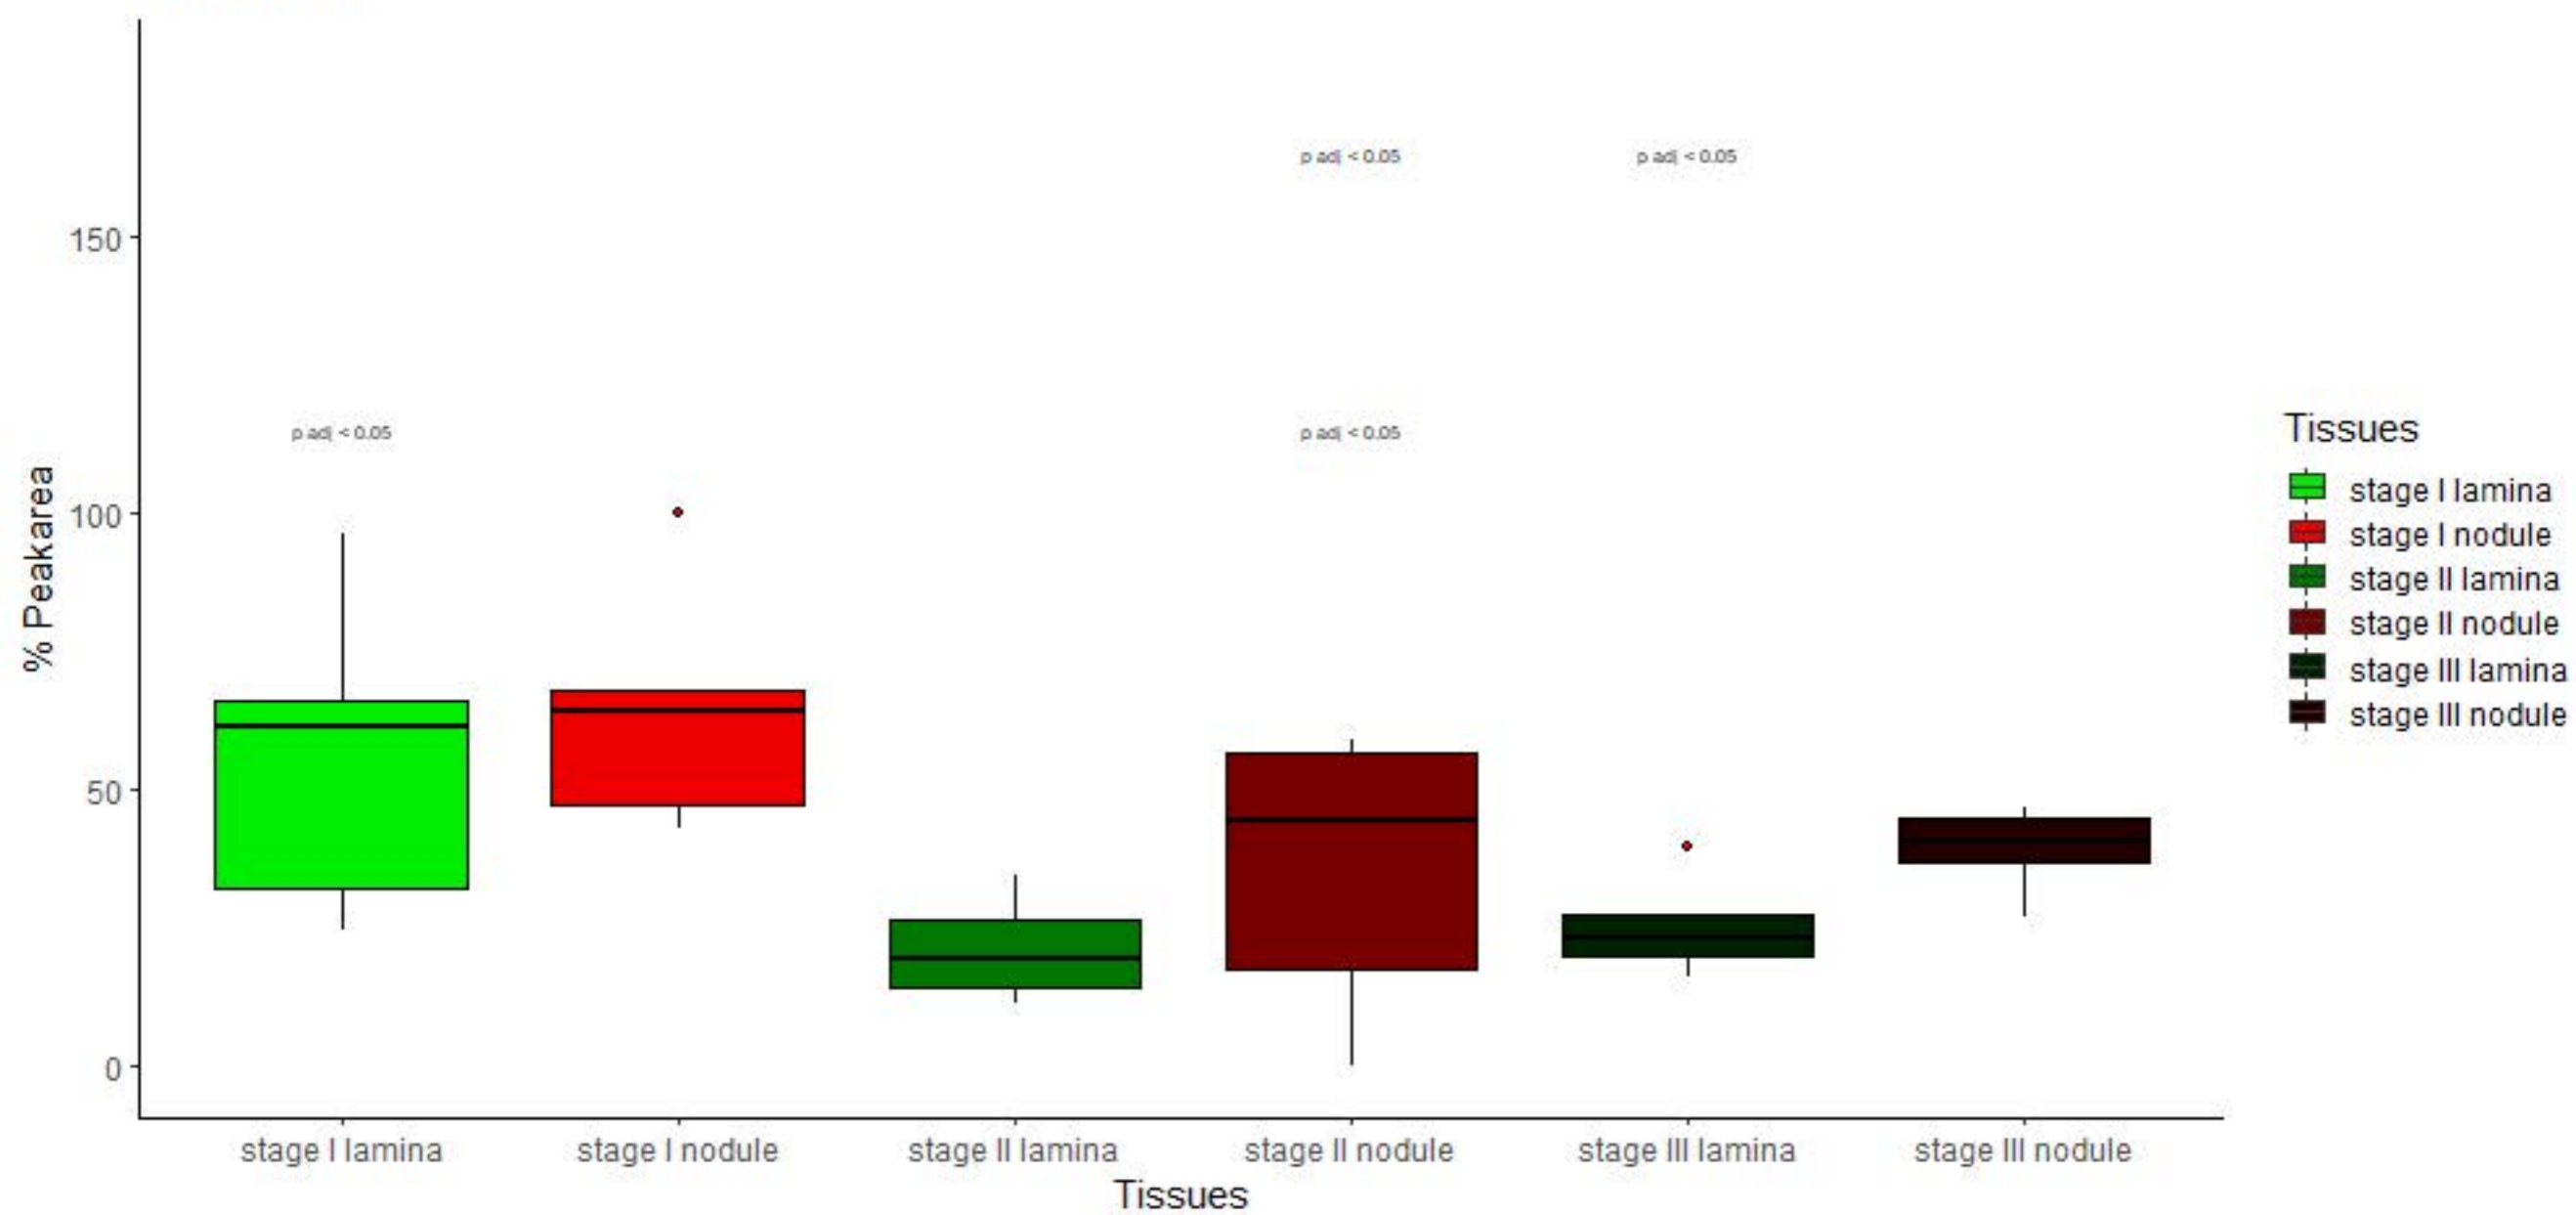

# Sugar alcohol RI 1968

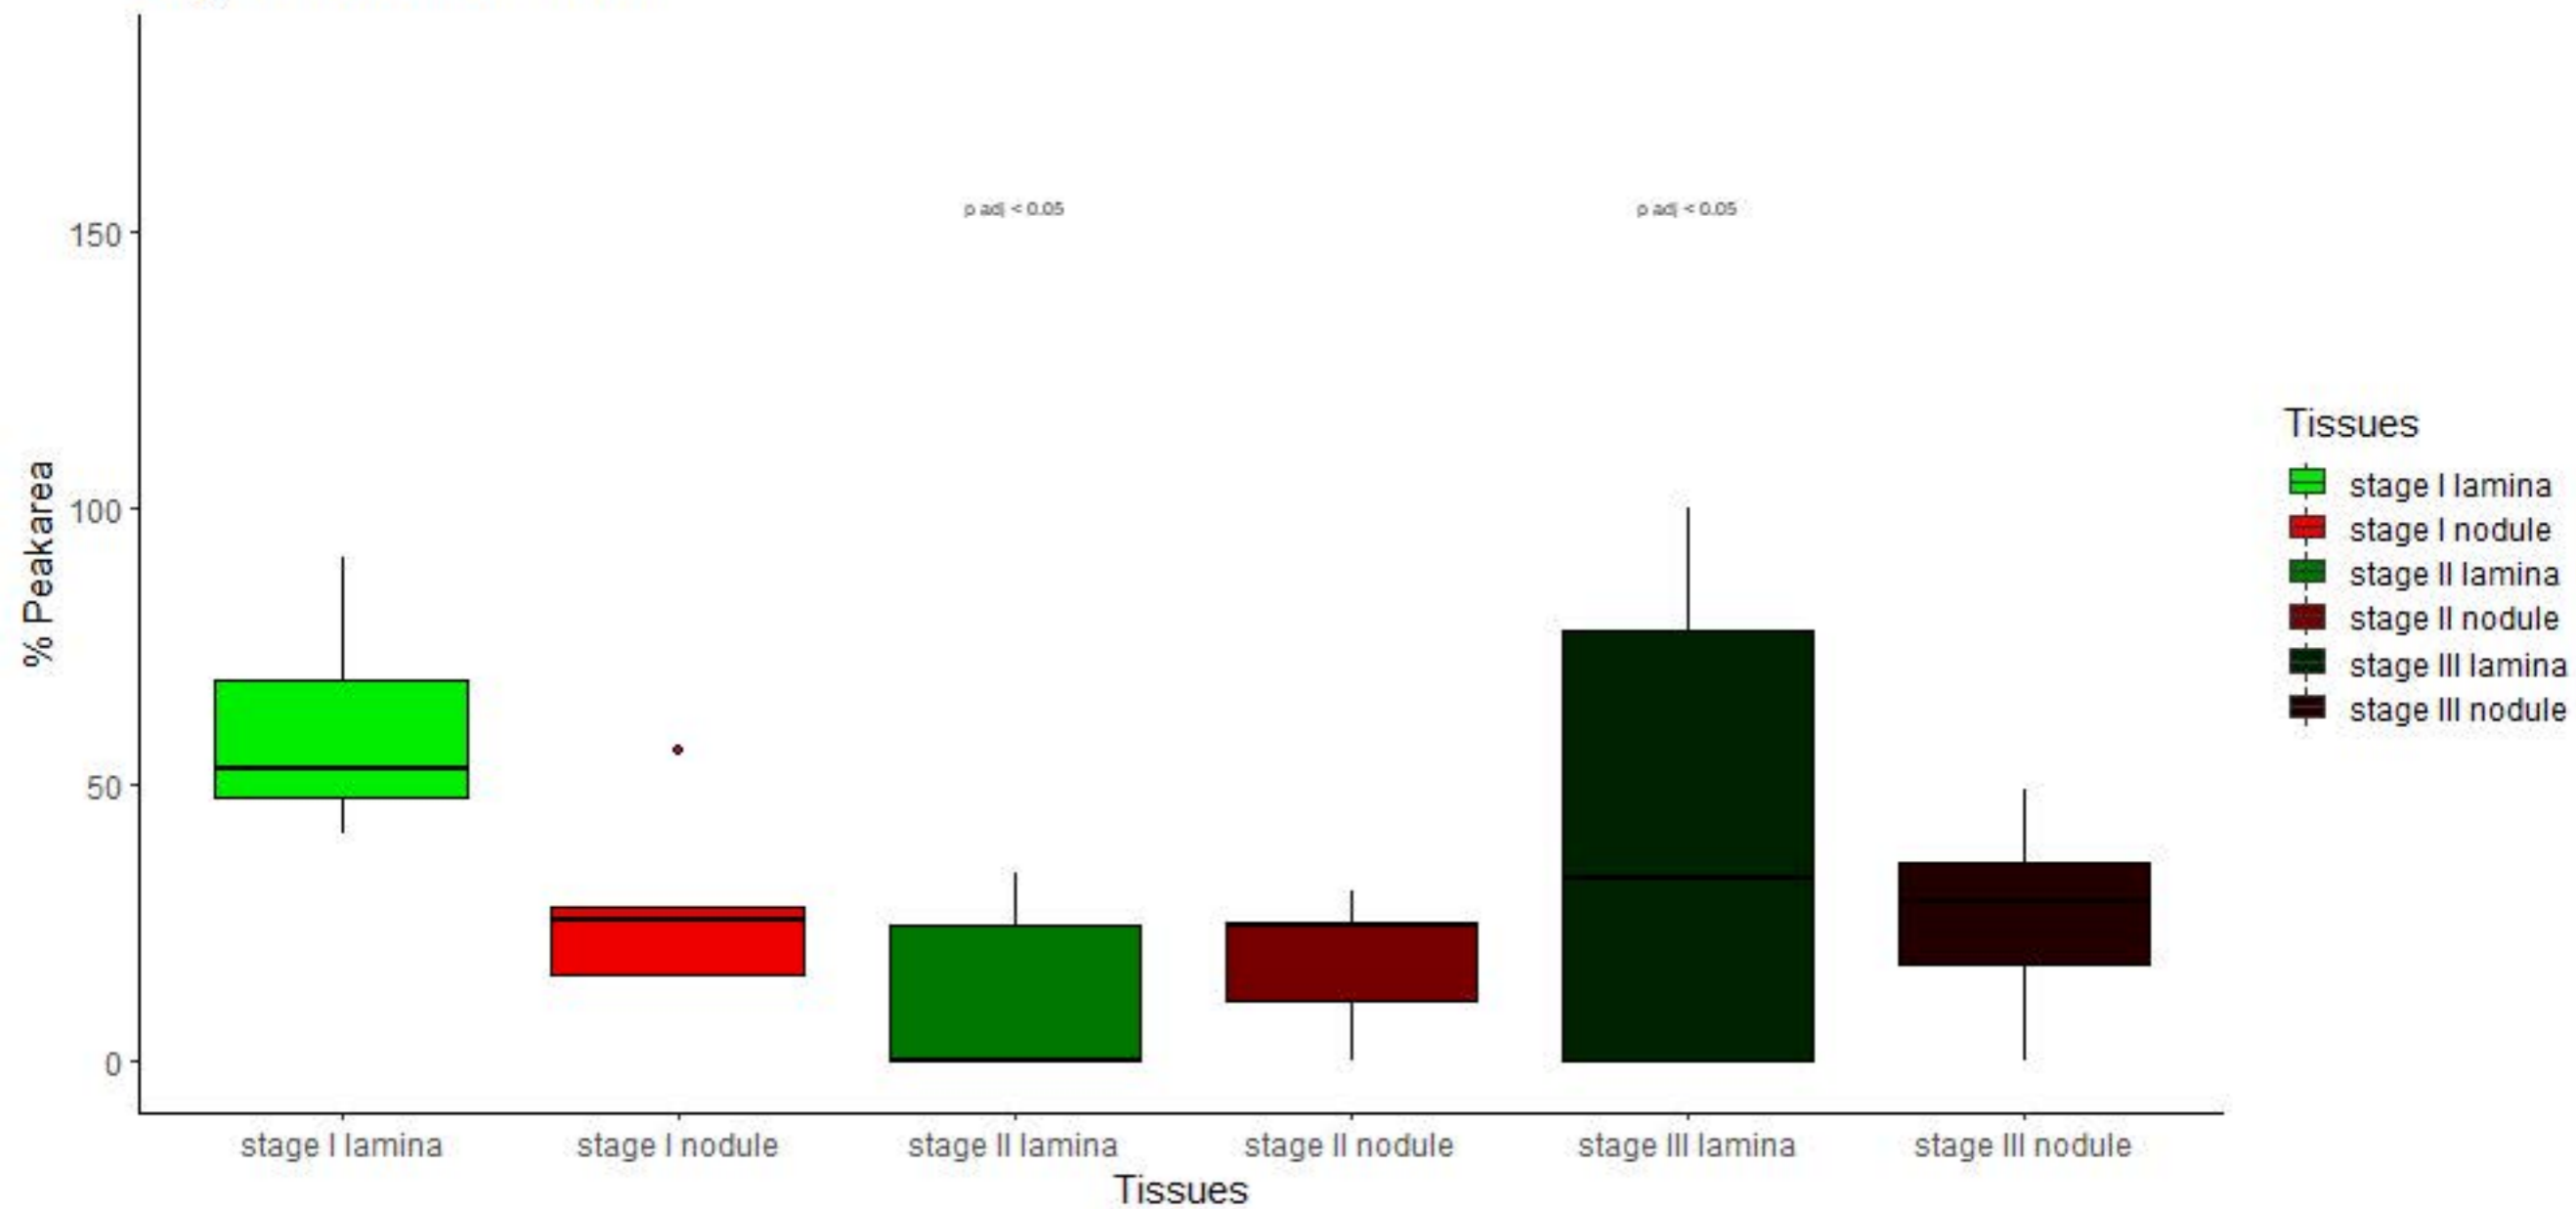

# Inositol-2-phosphate, myo-

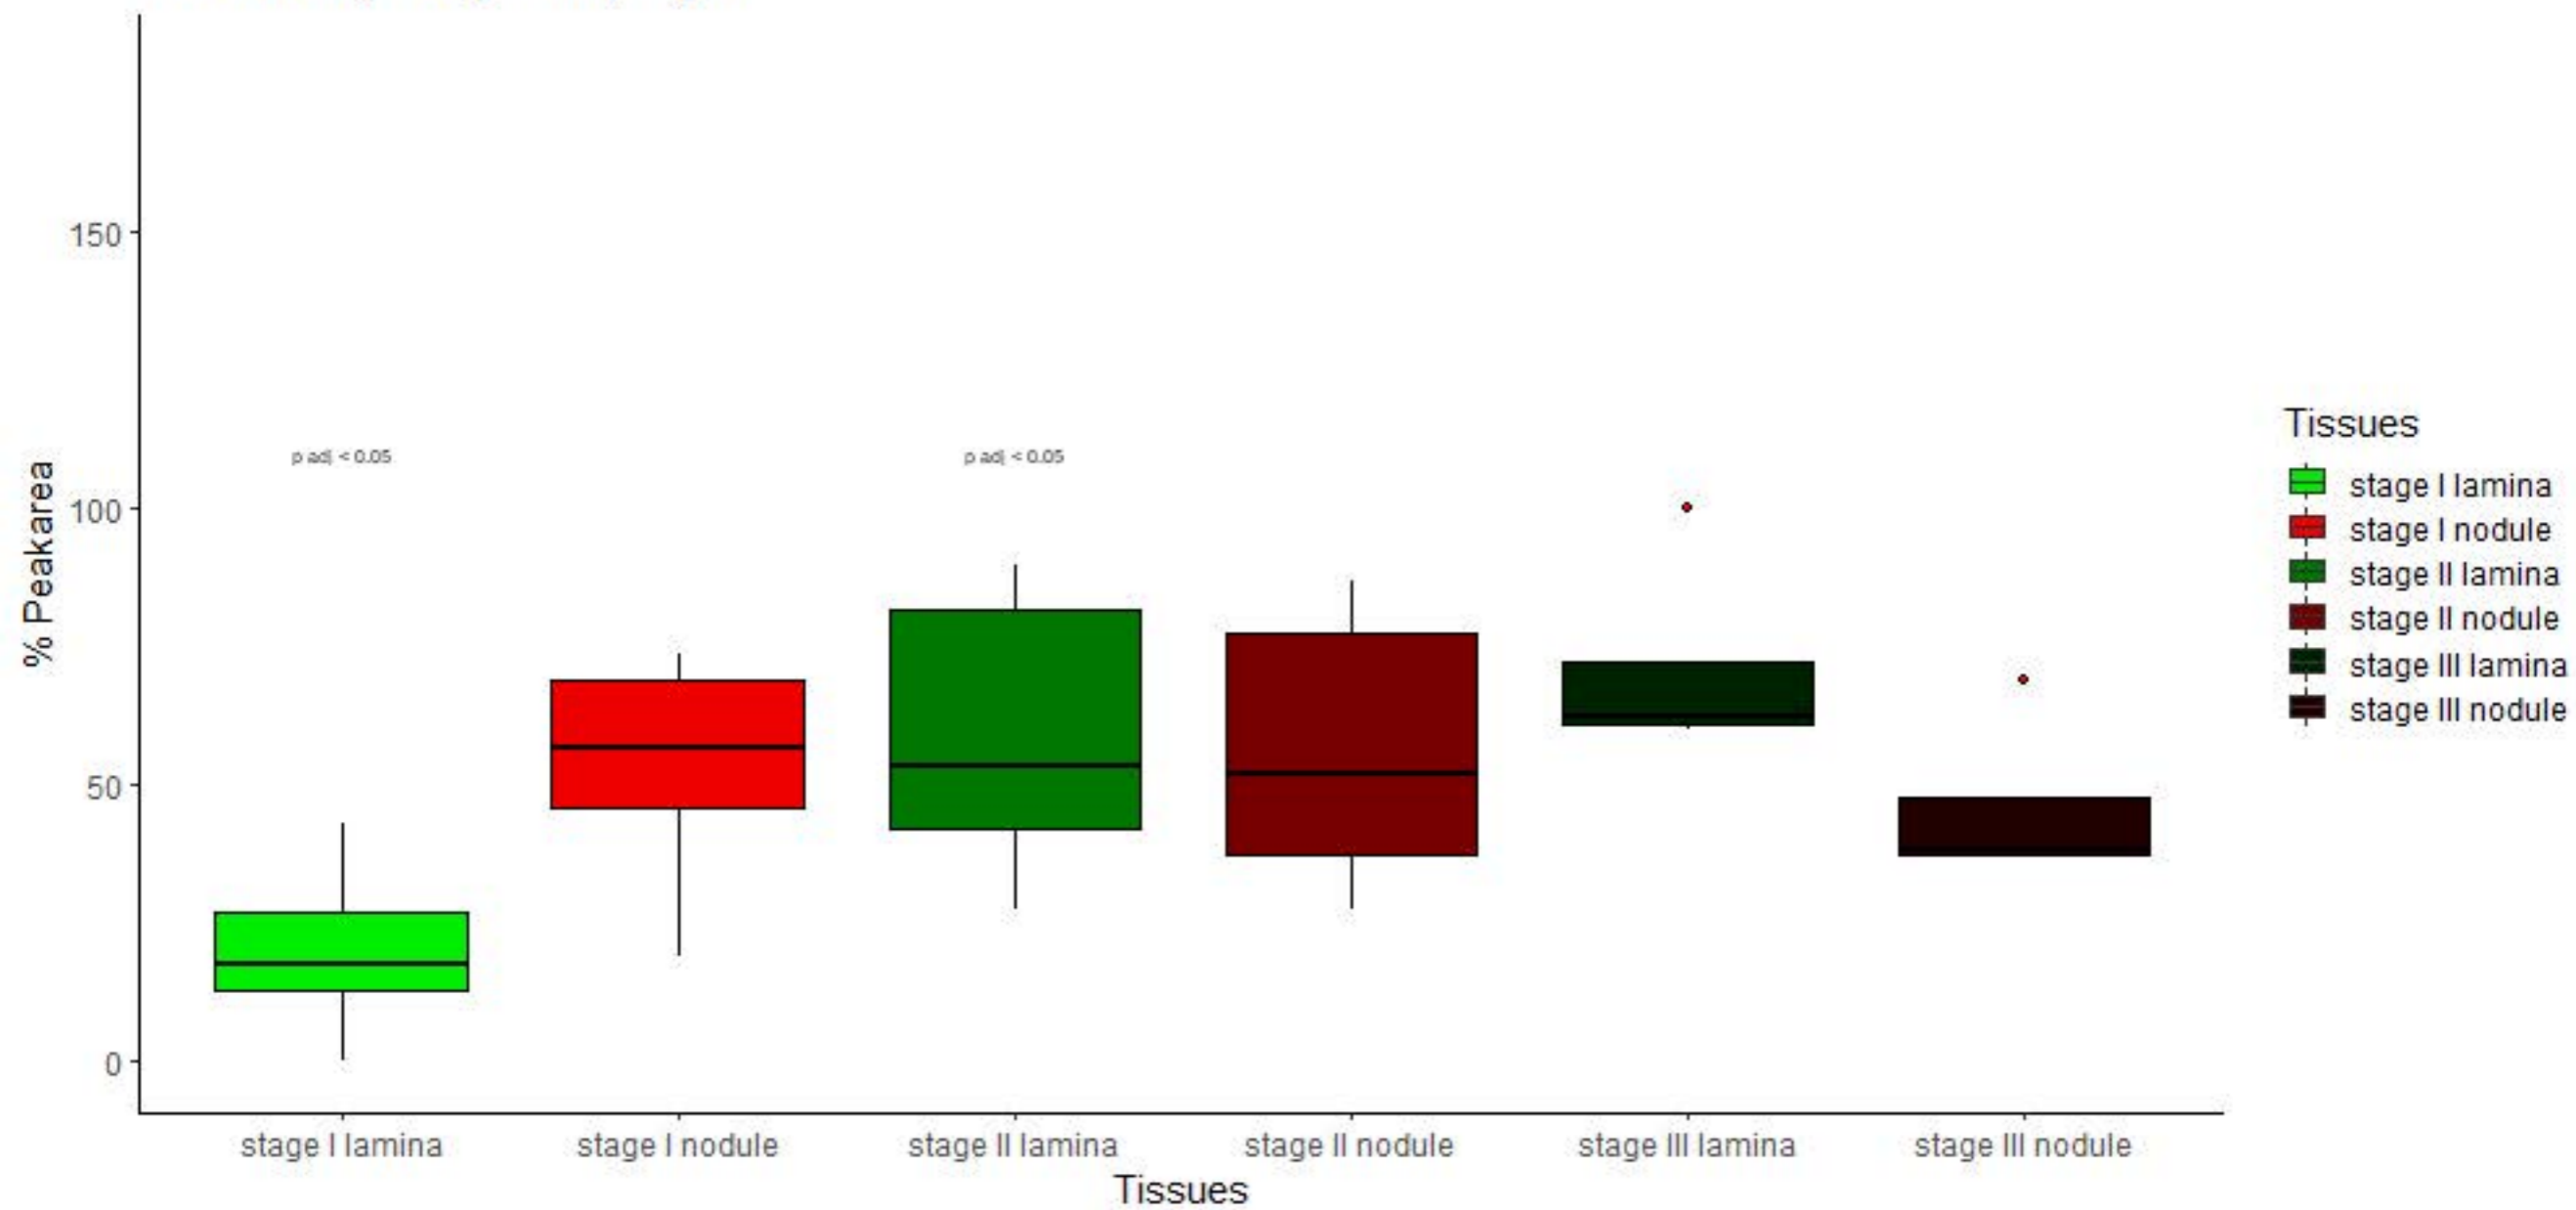

# Glycine

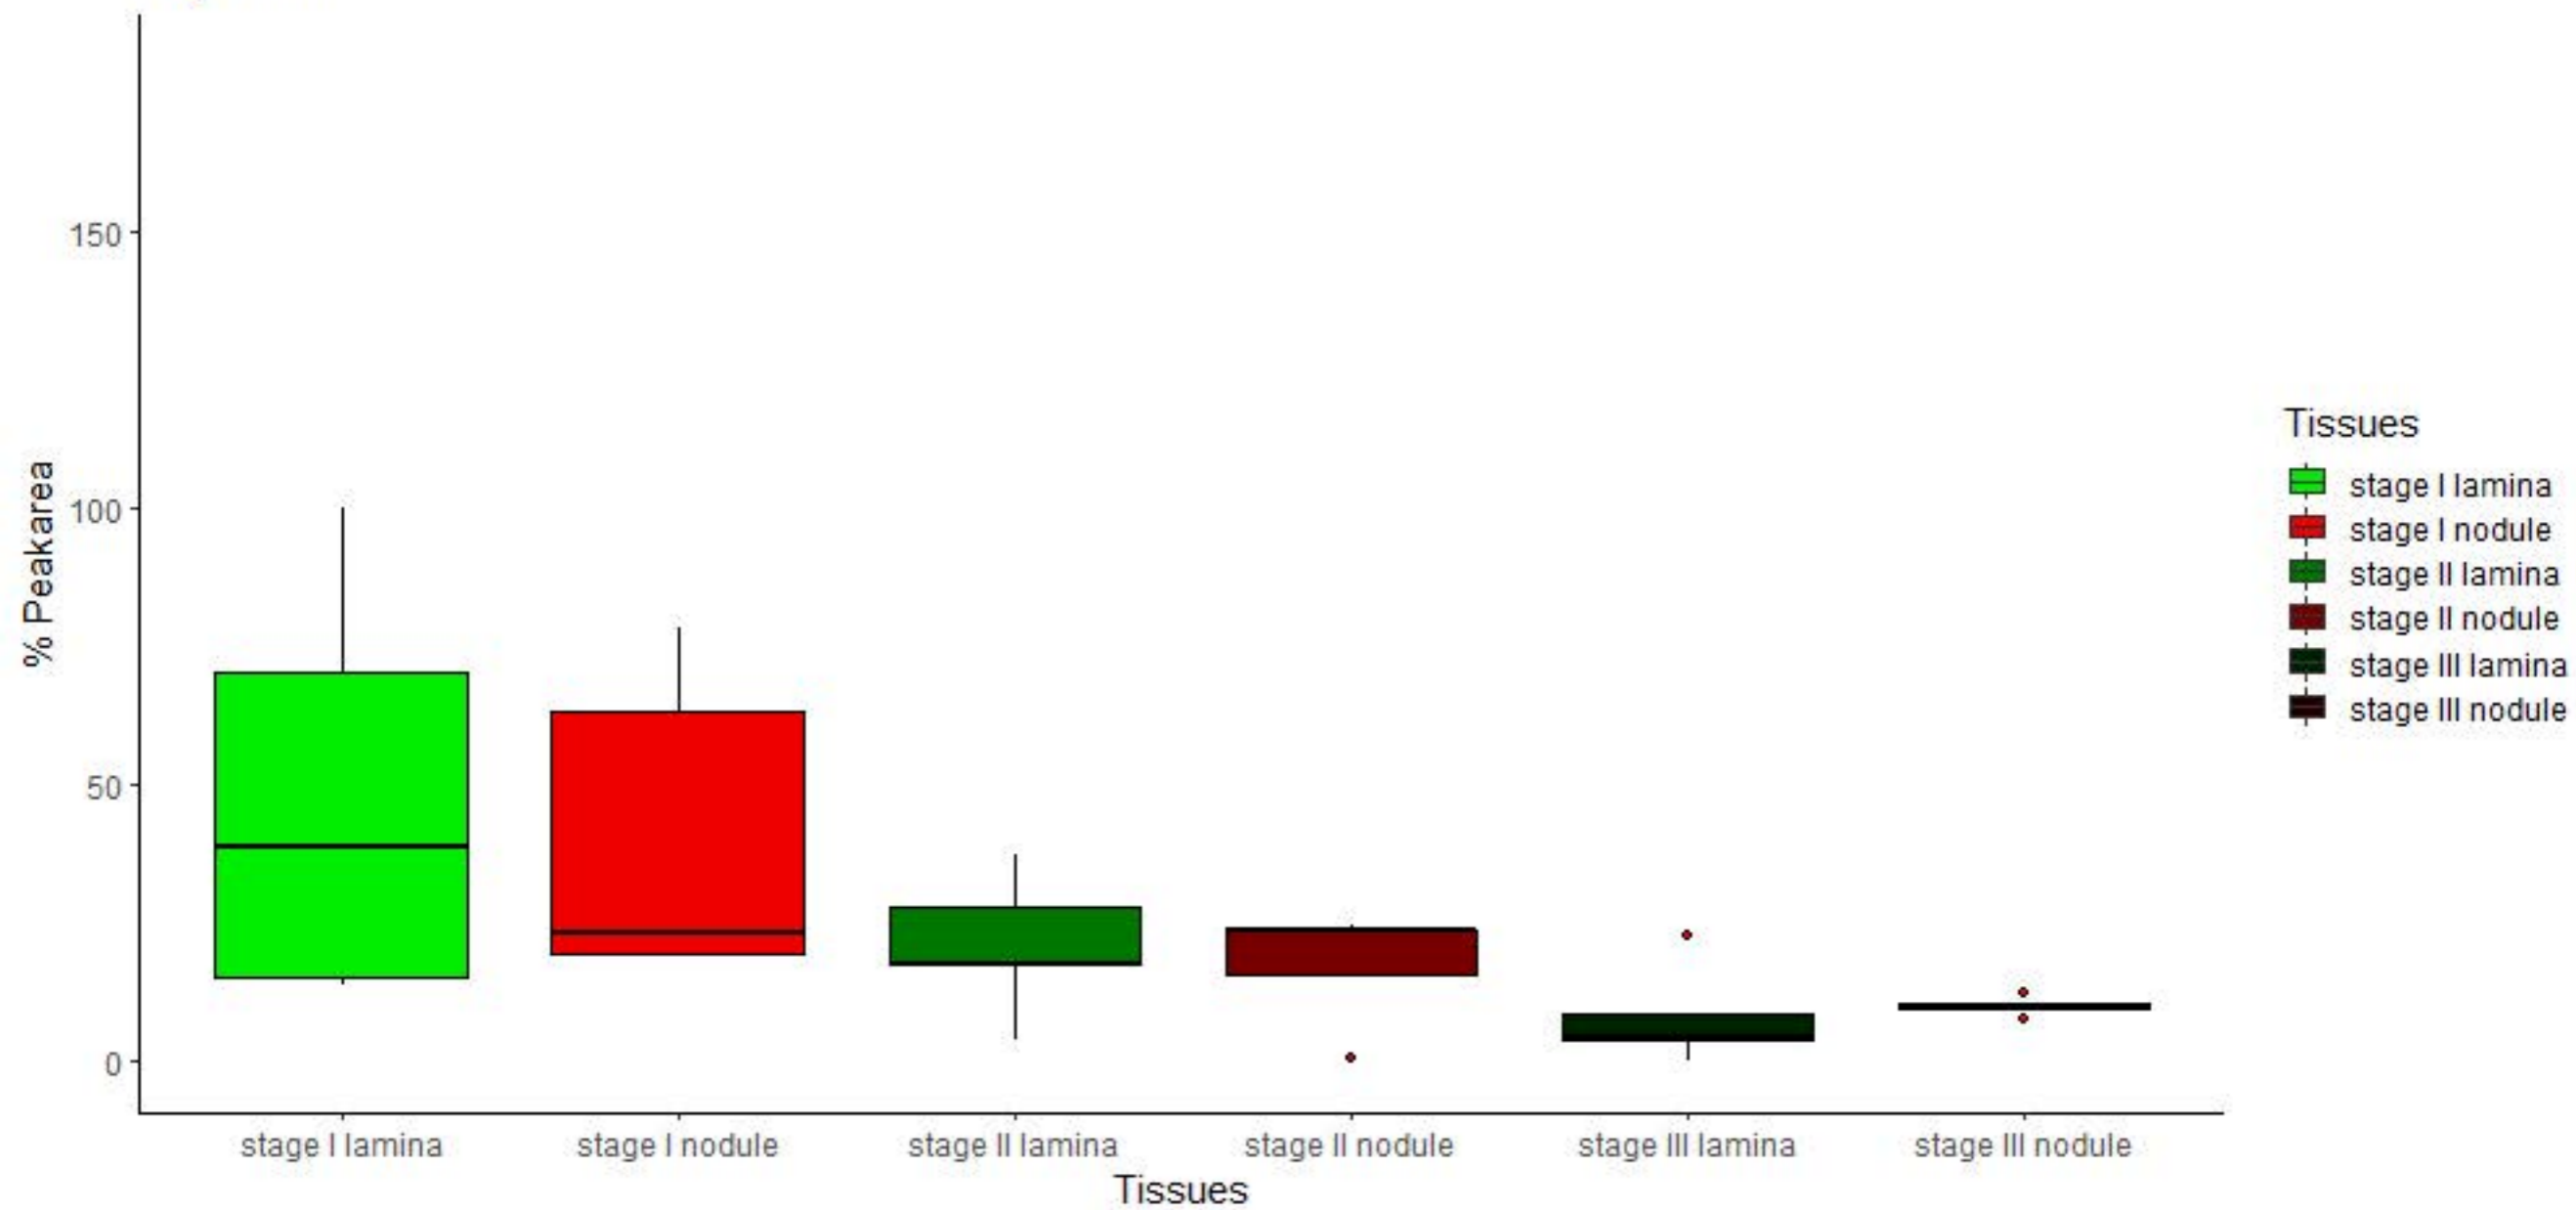

# Isoleucine

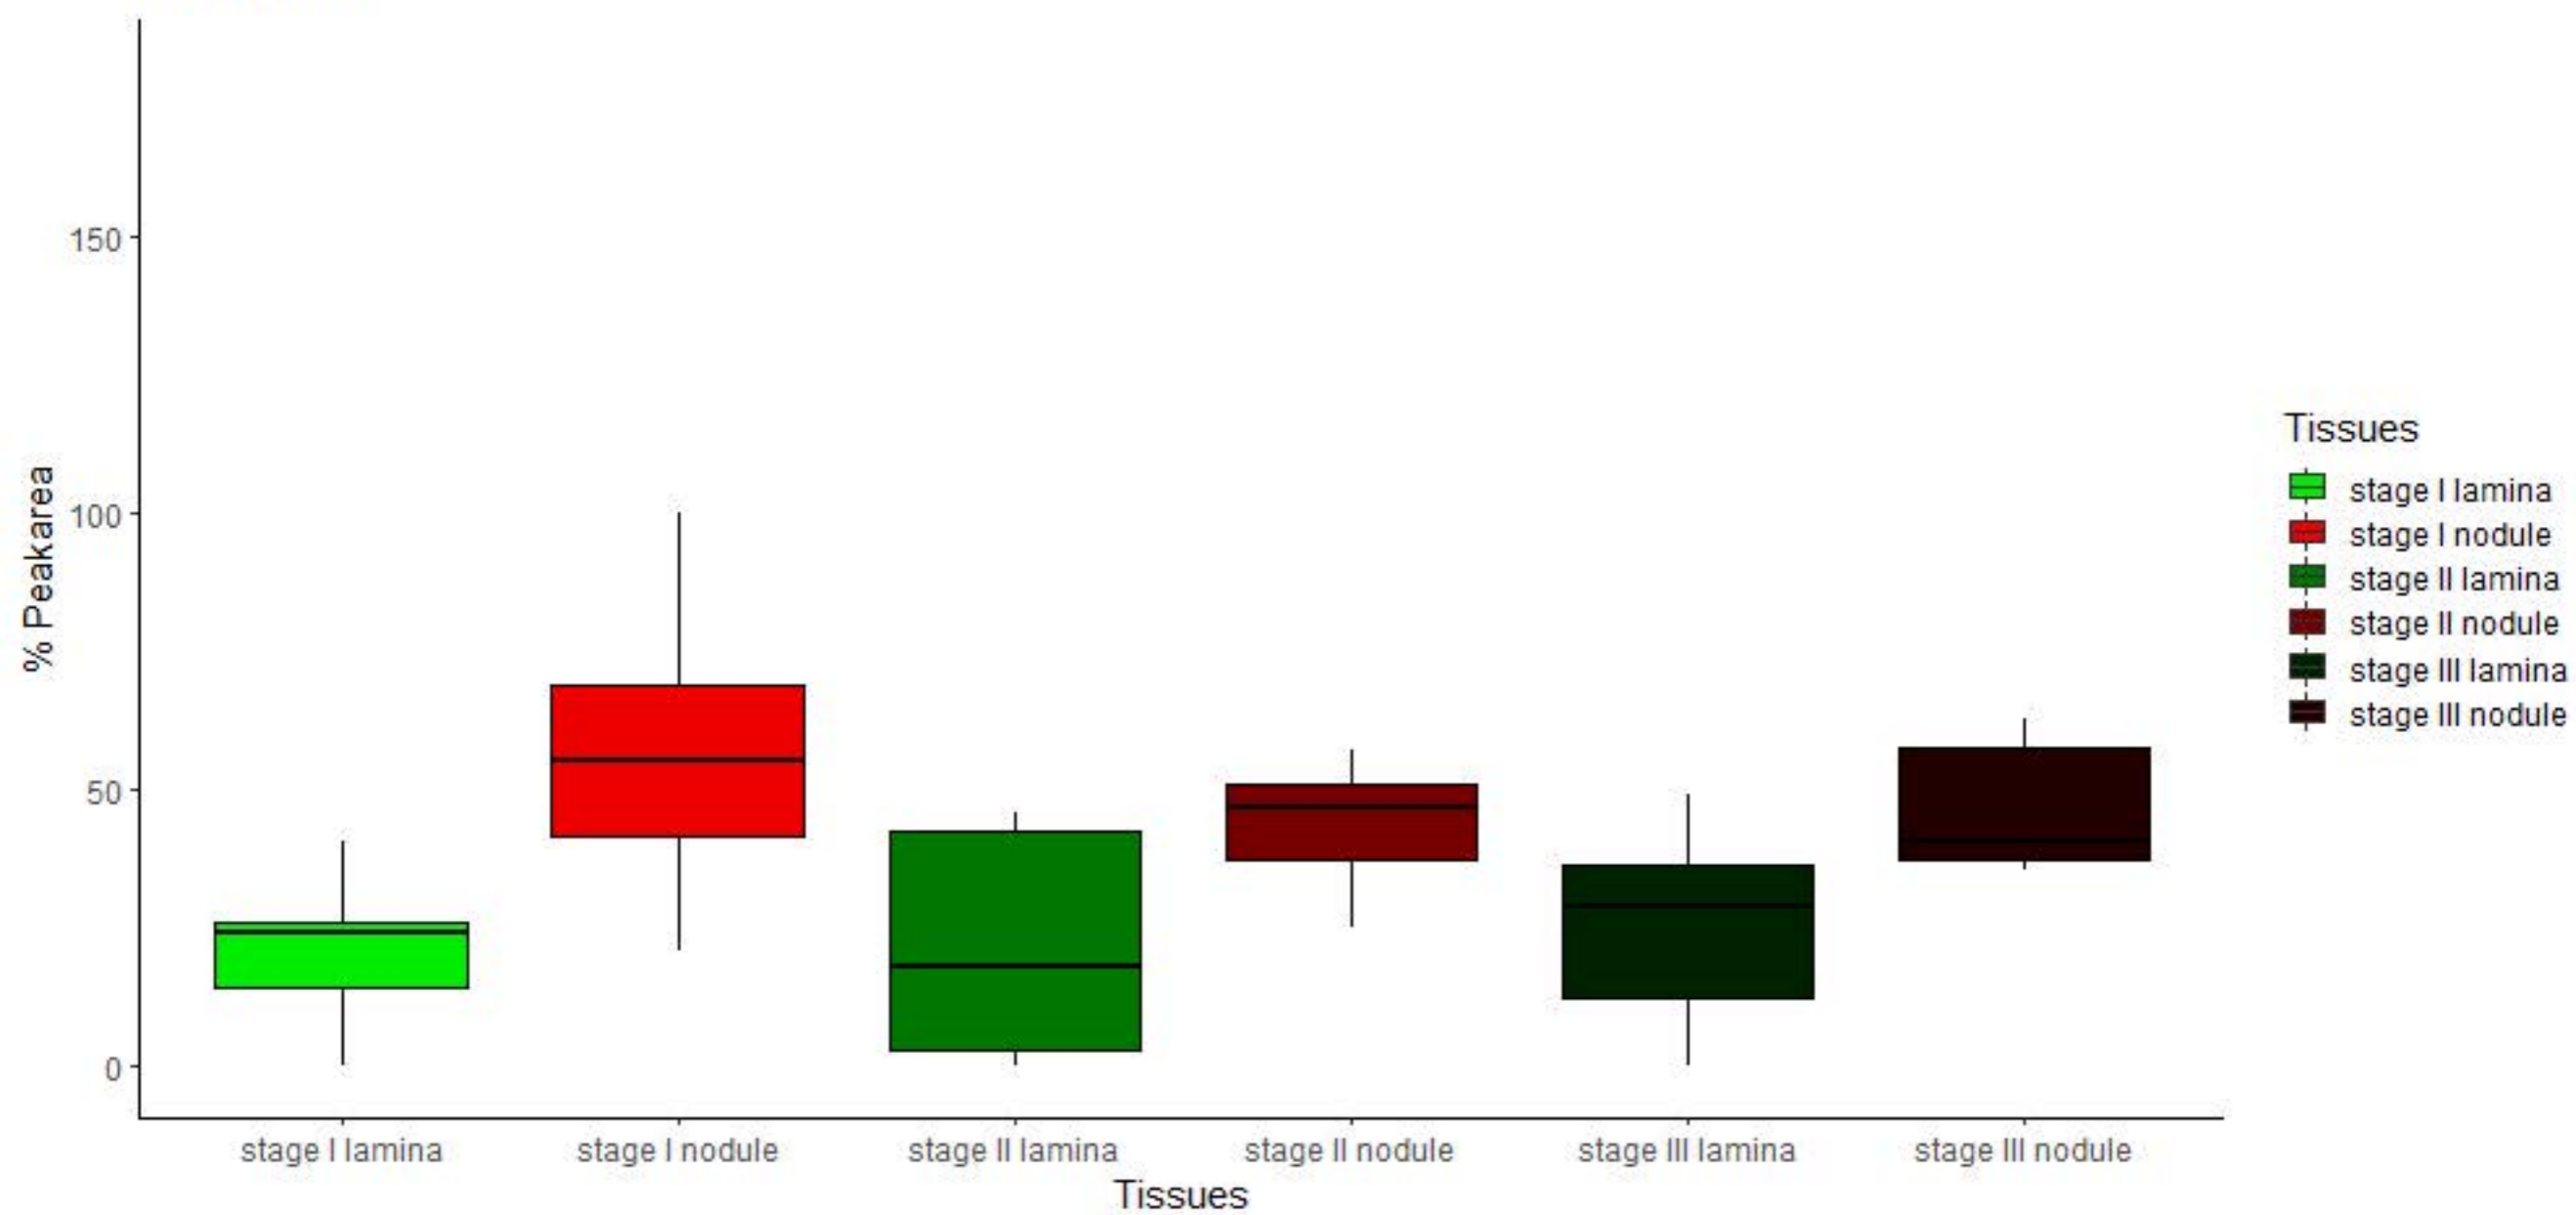

# Proline

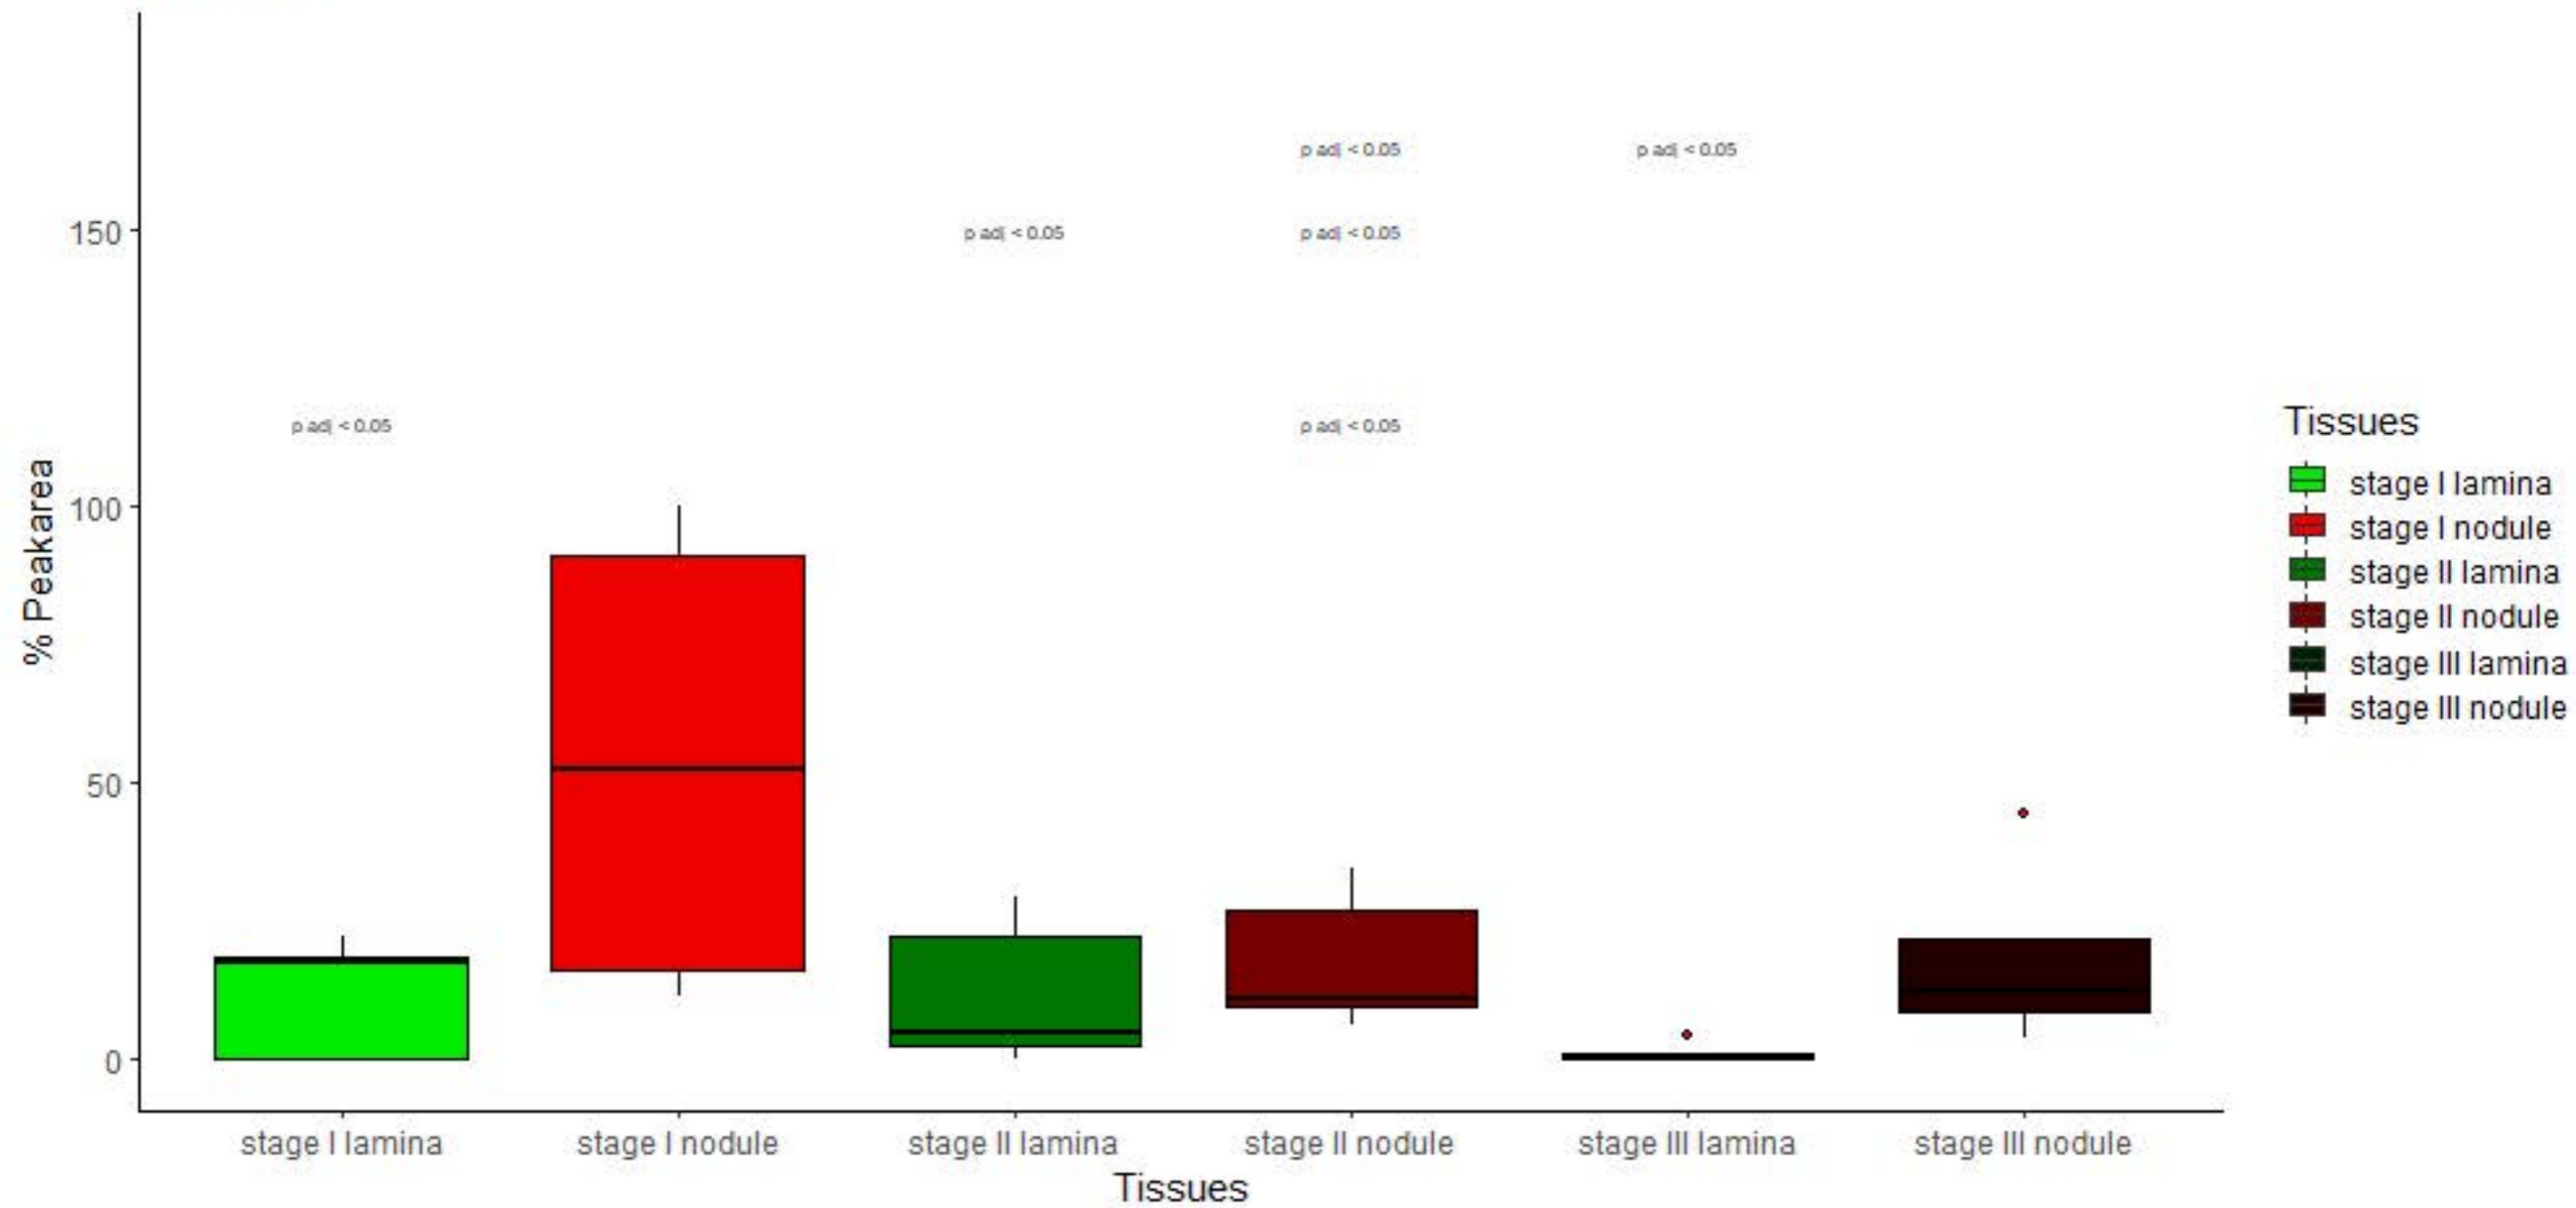

# Glutamic acid

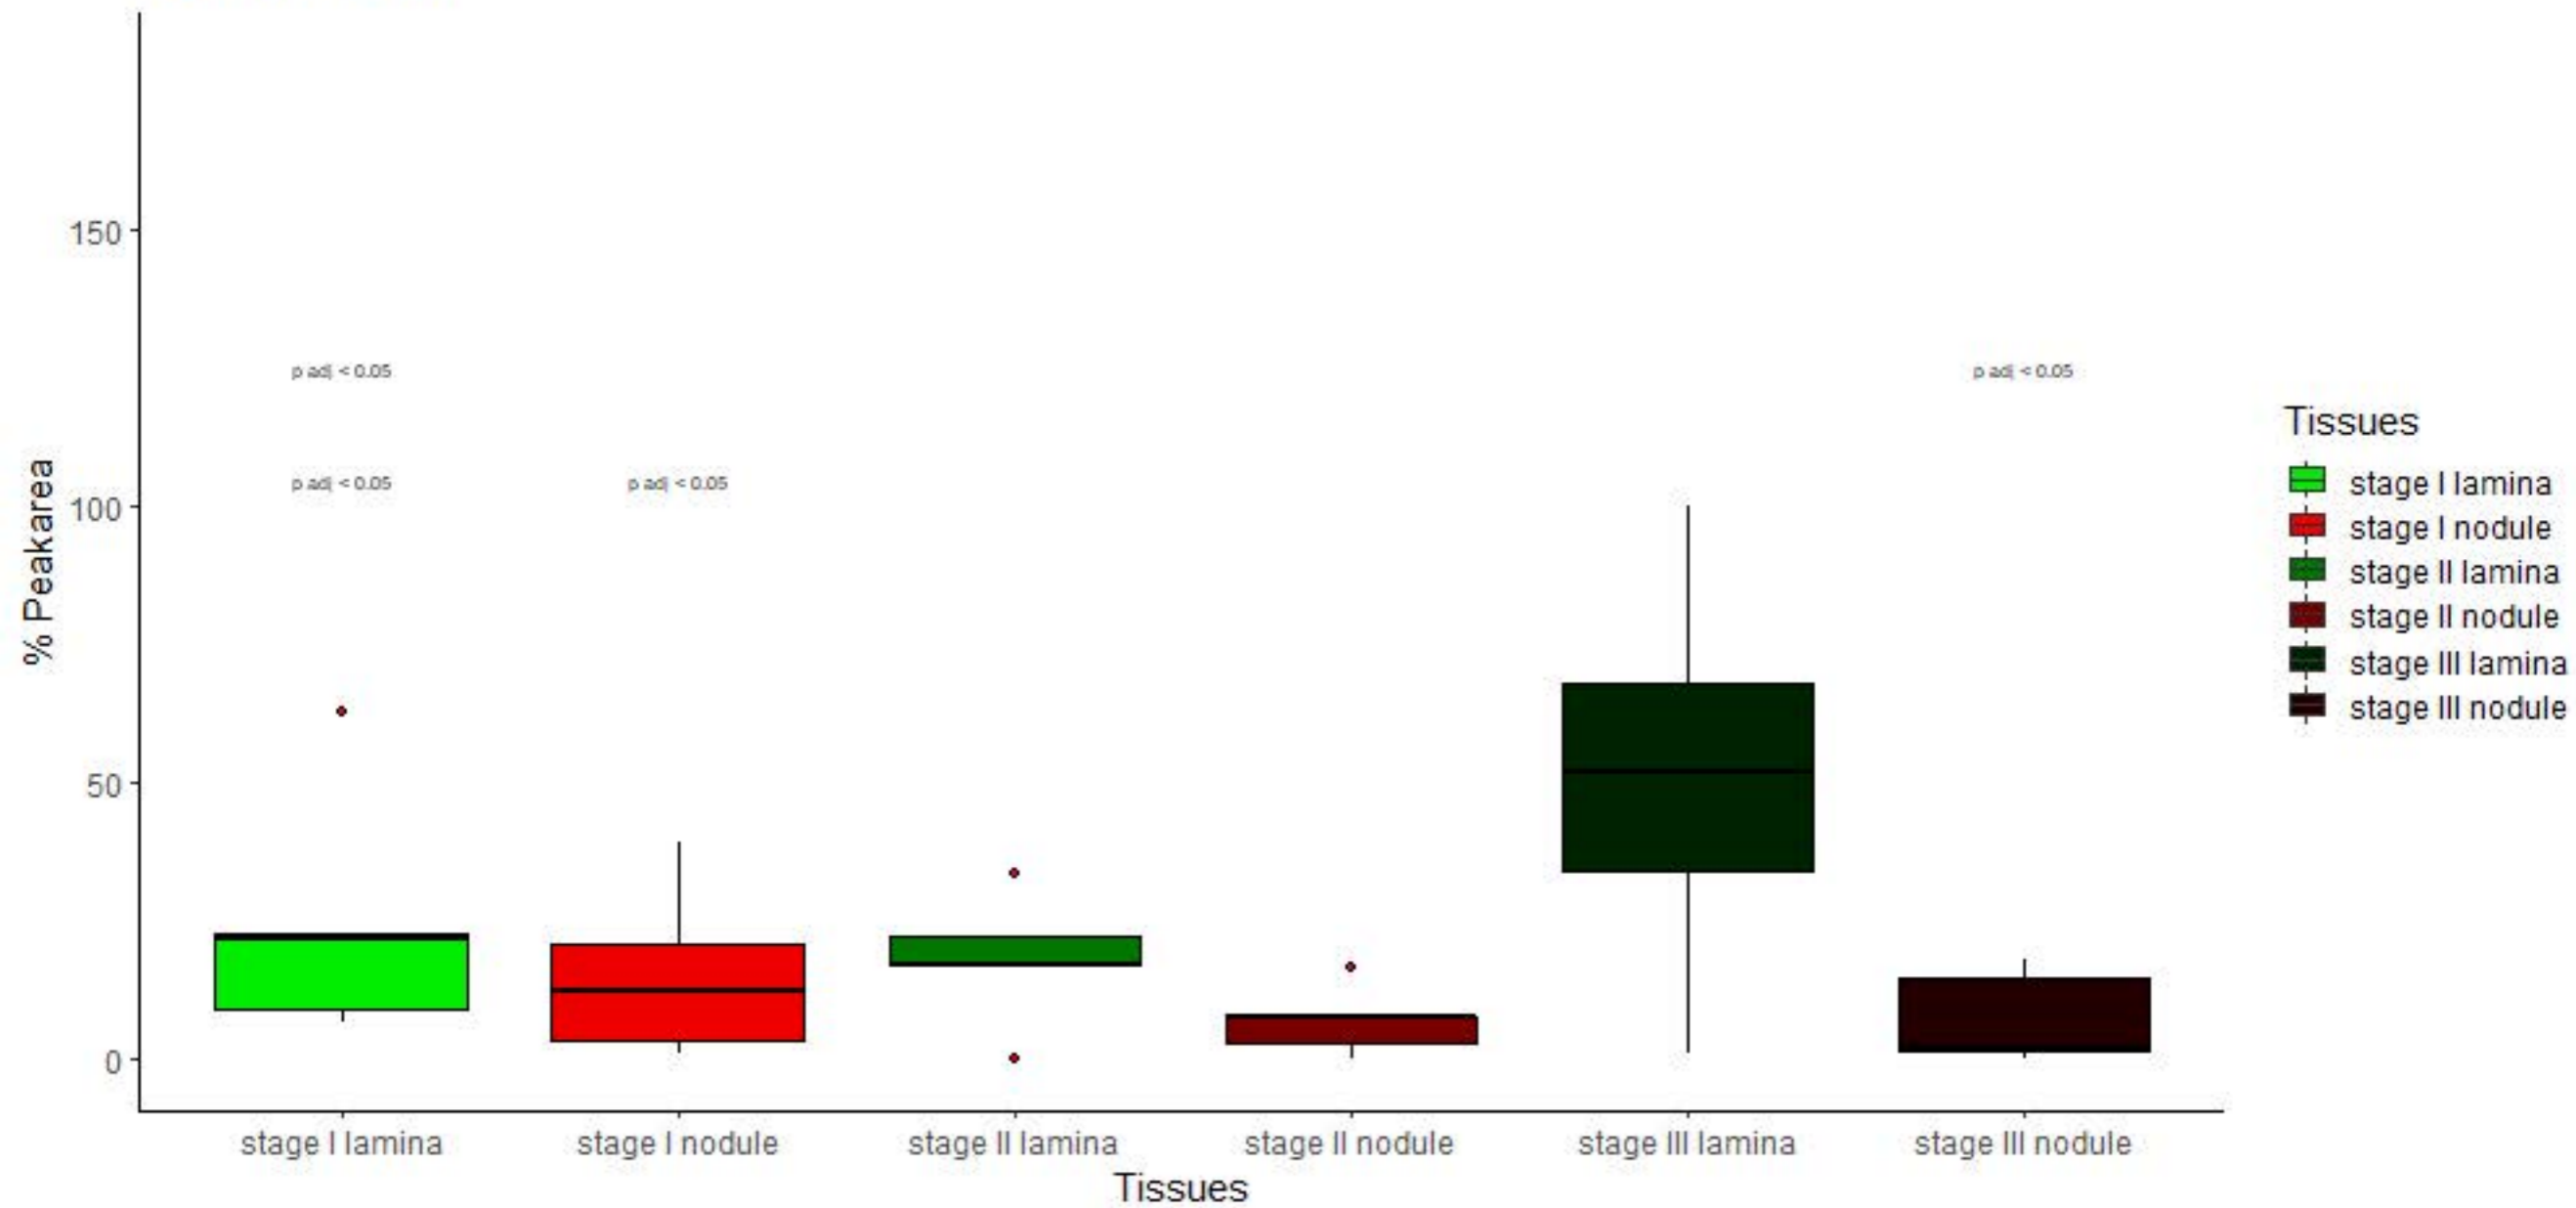



# Phenylalanine

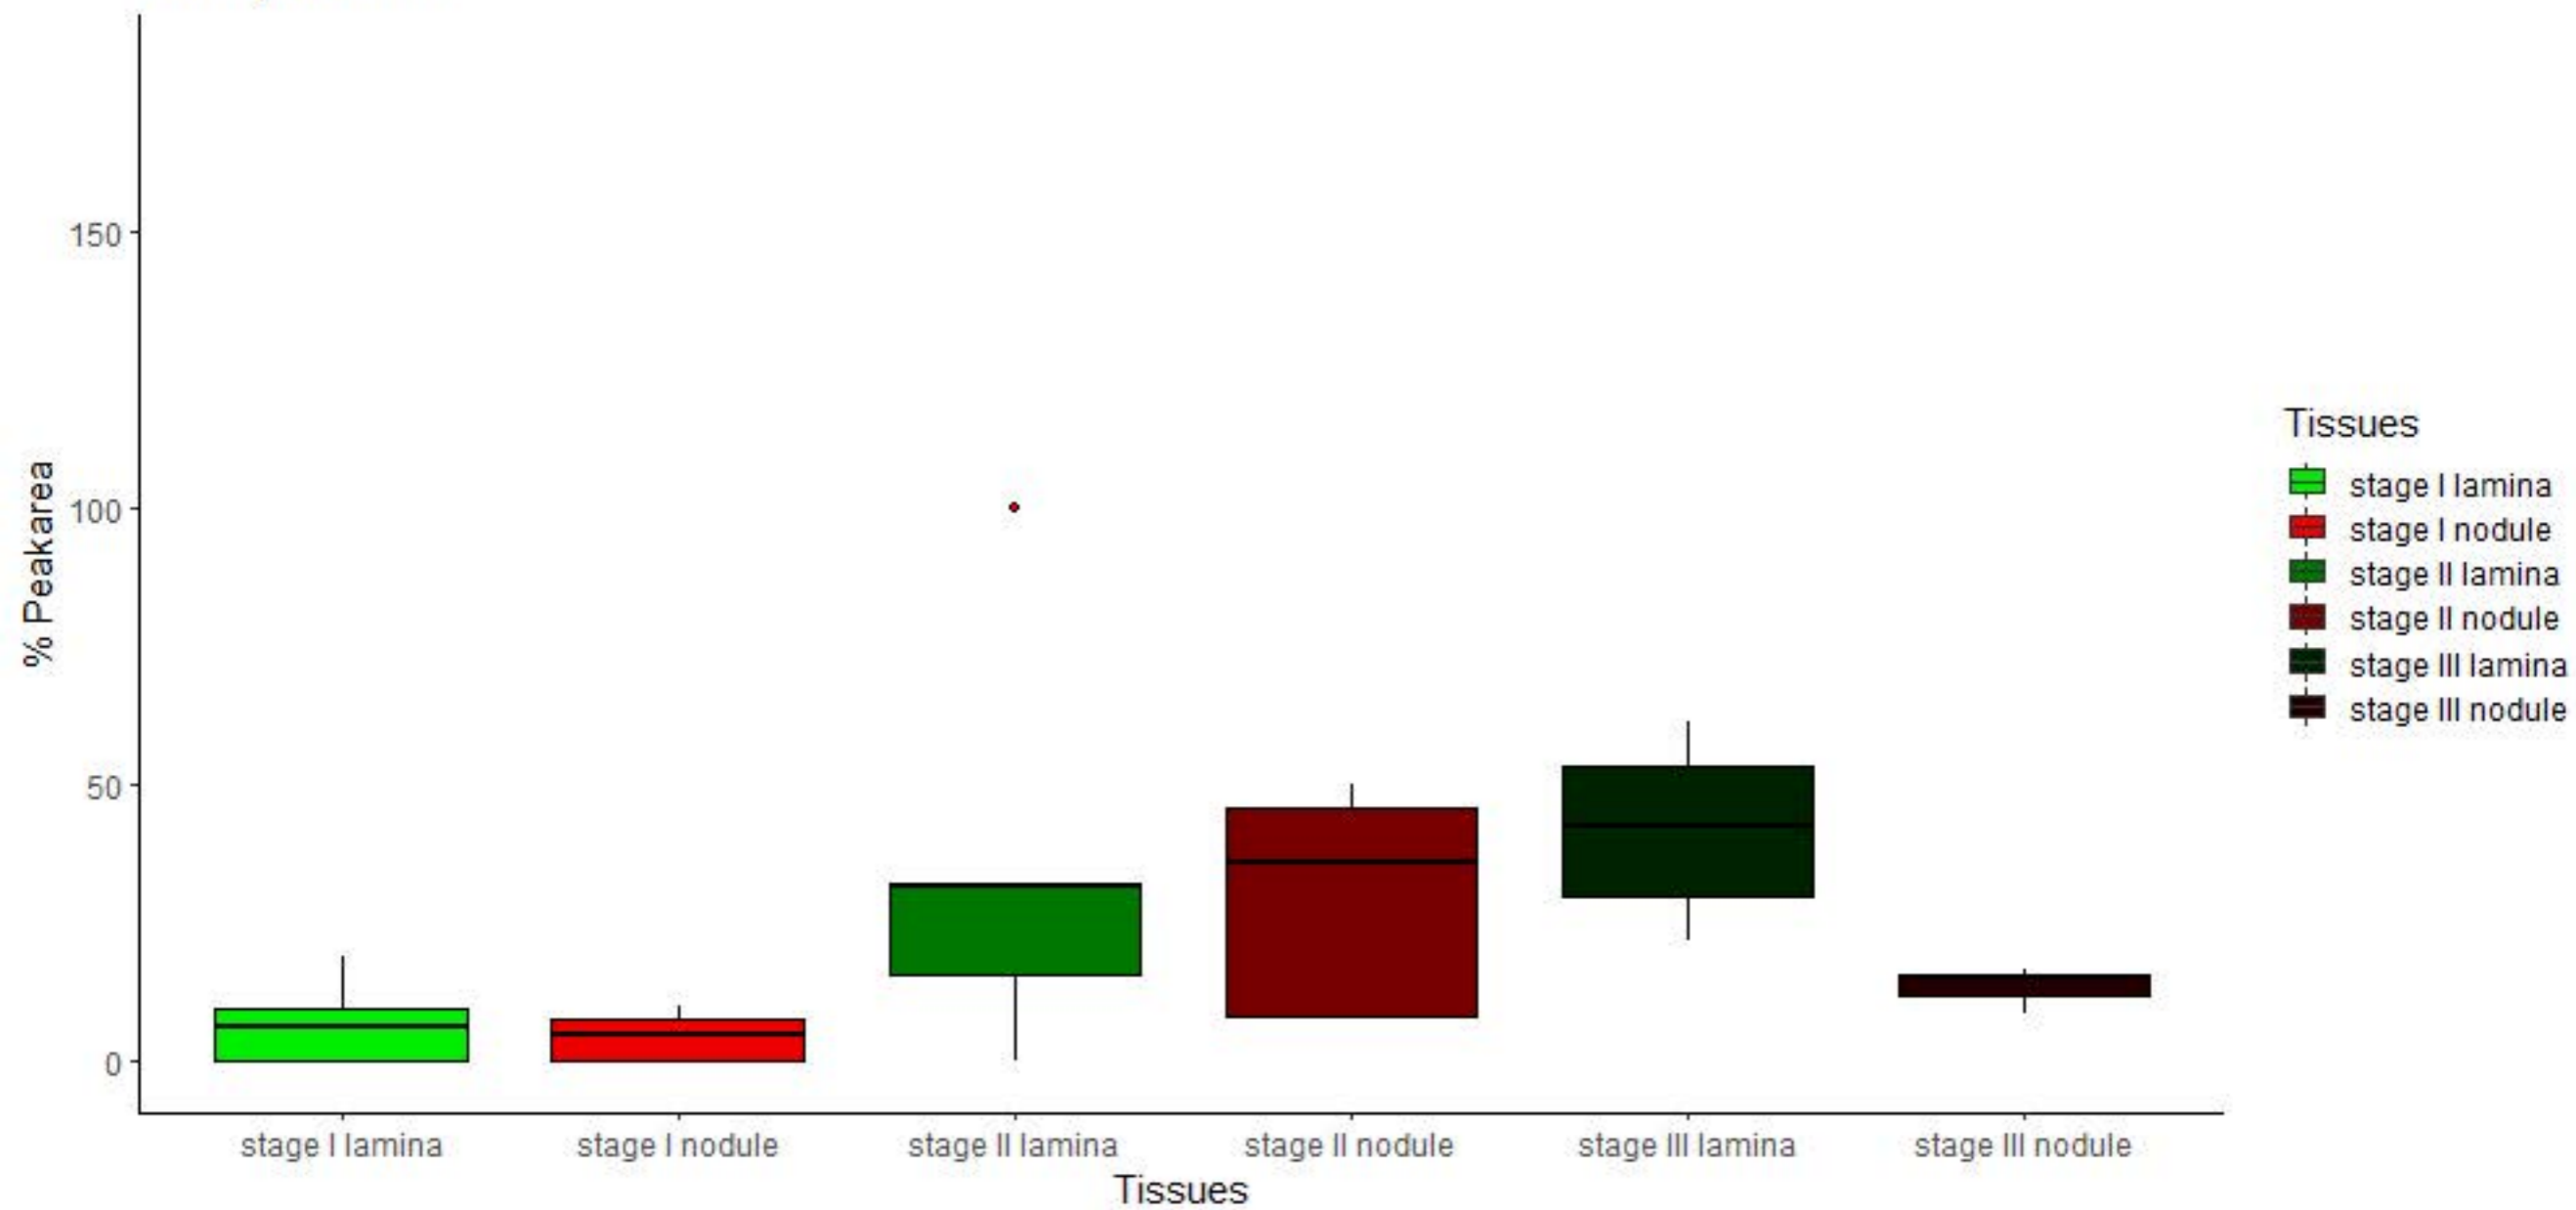

# Tryptophan

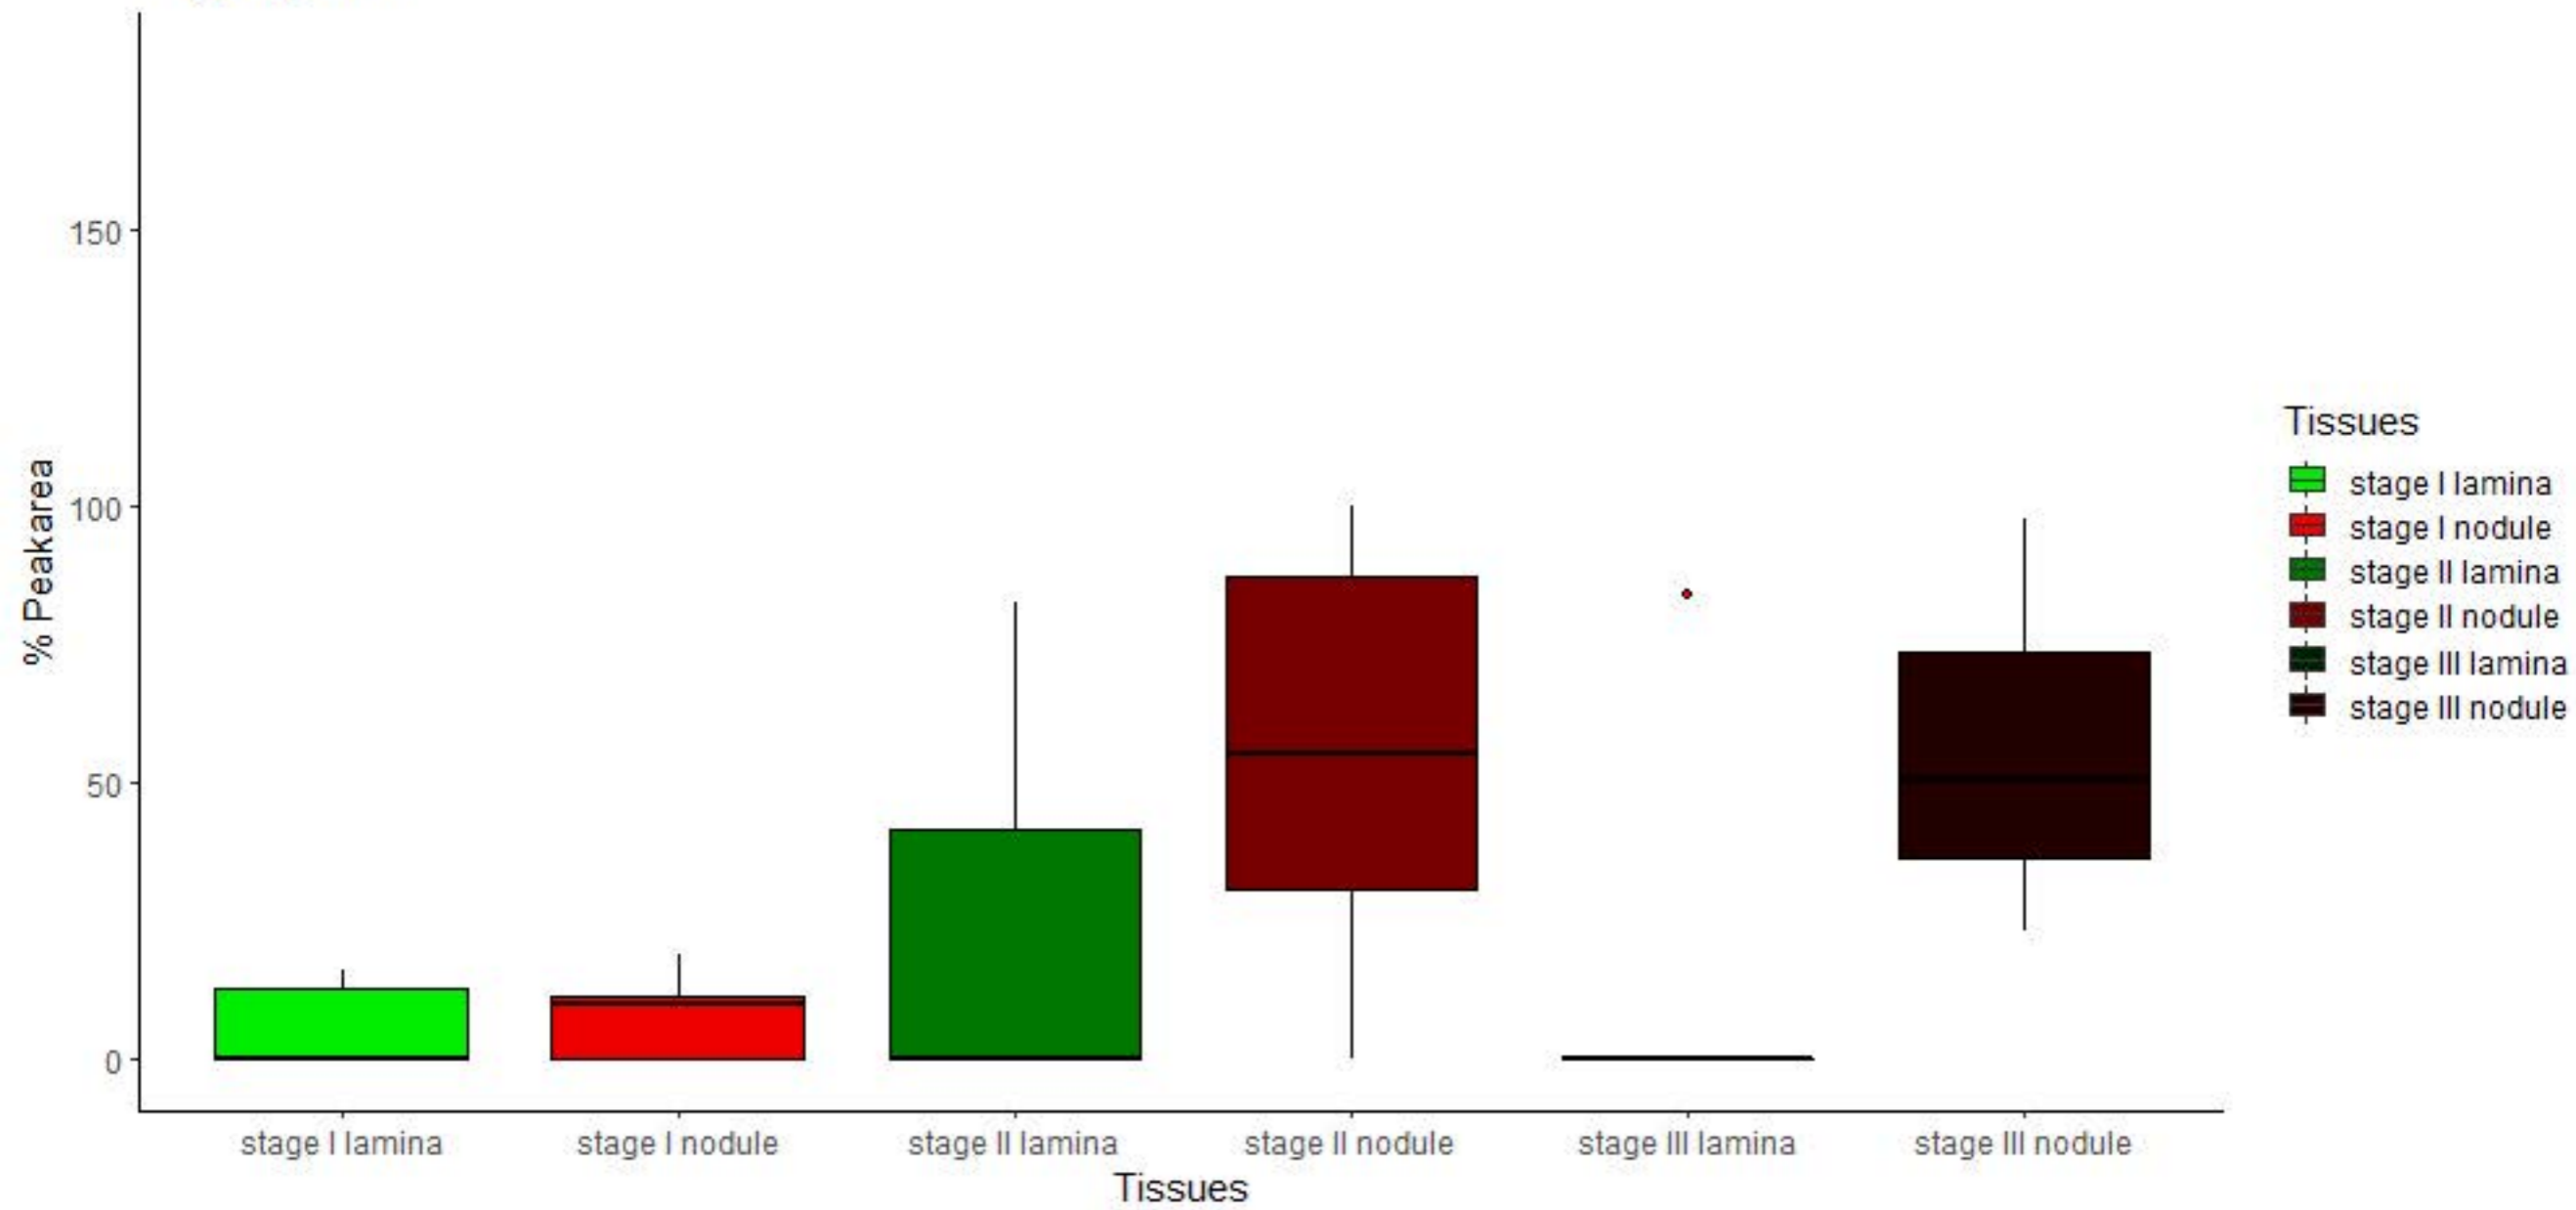

# ?Ethanaminephosphate

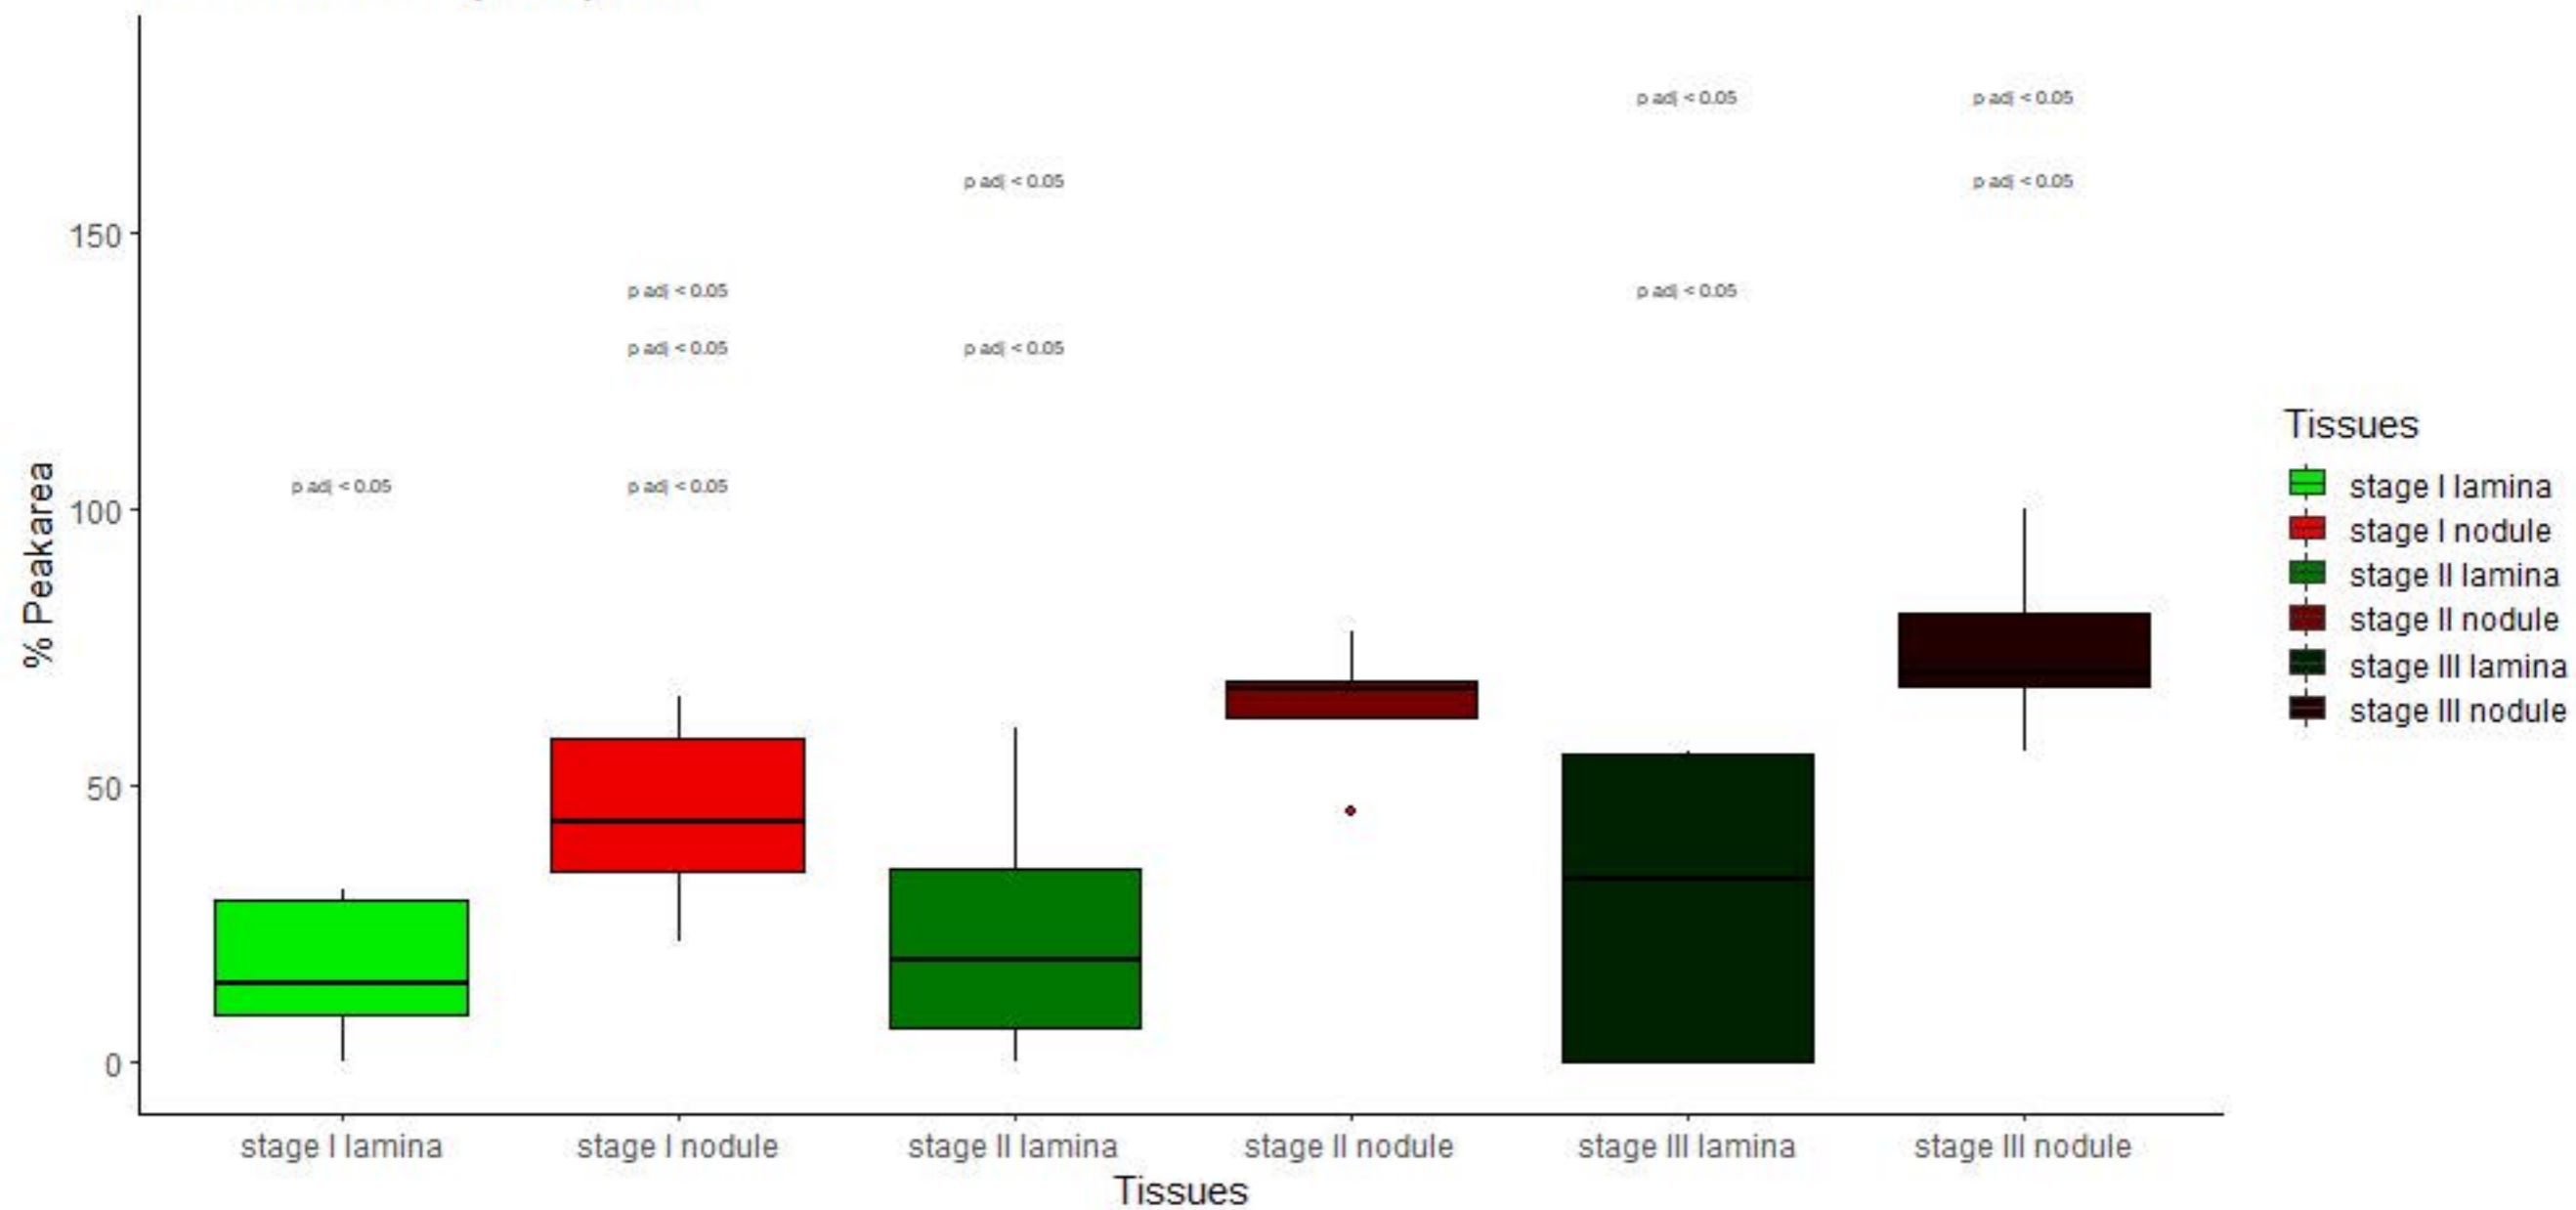

# Quinic acid

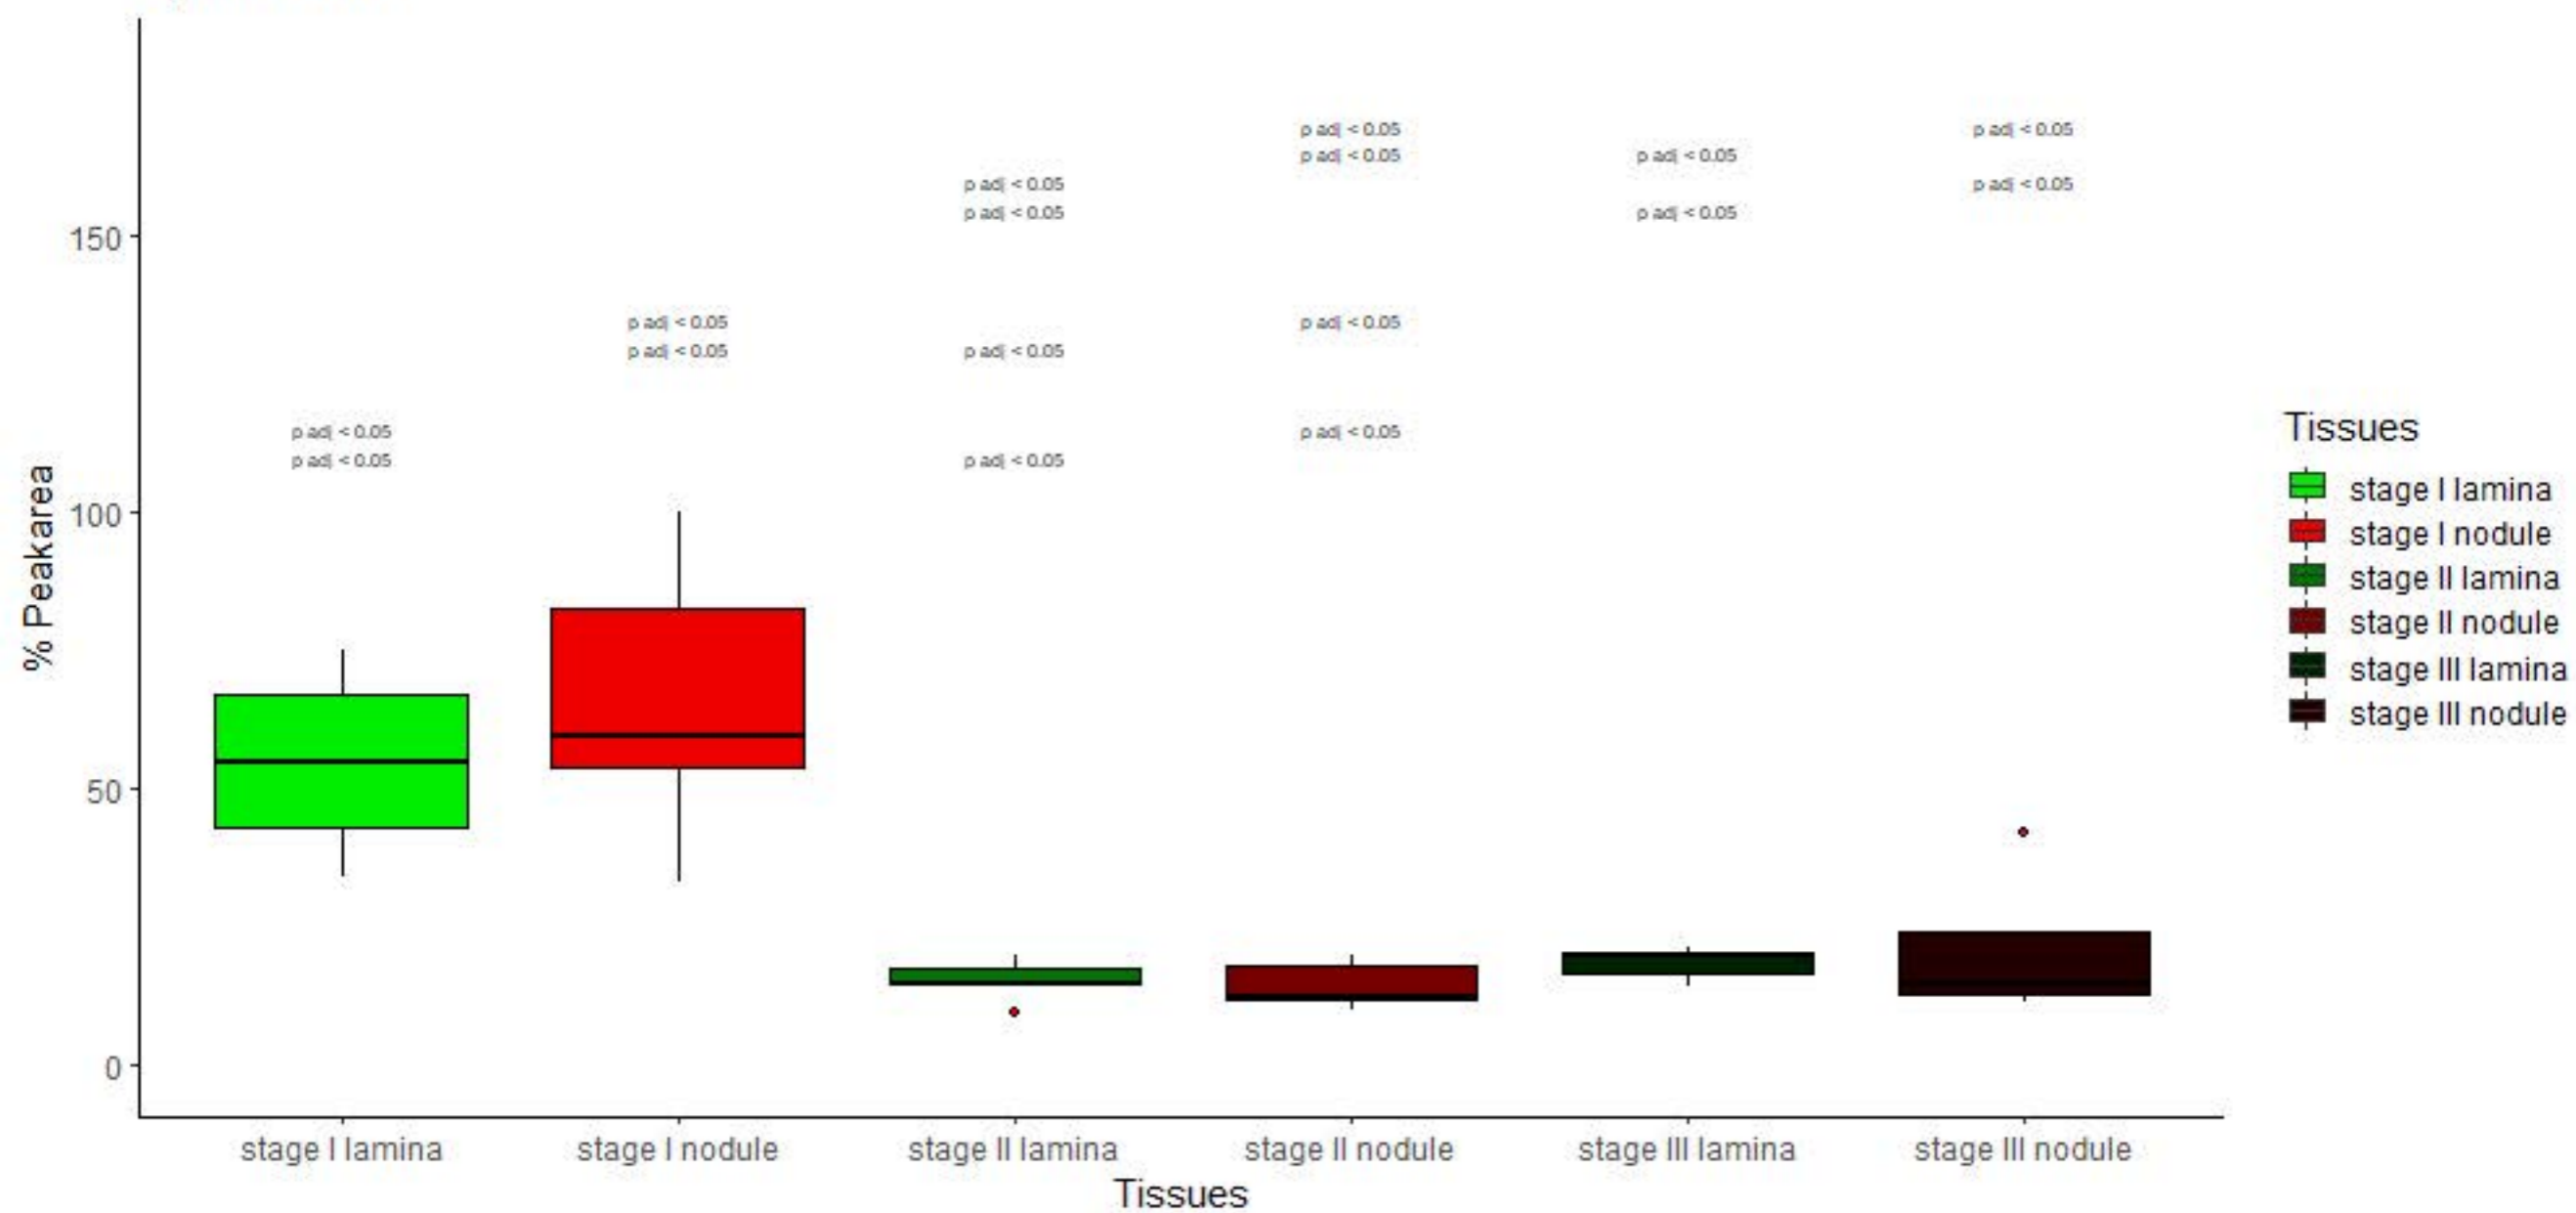

# Shikimic acid

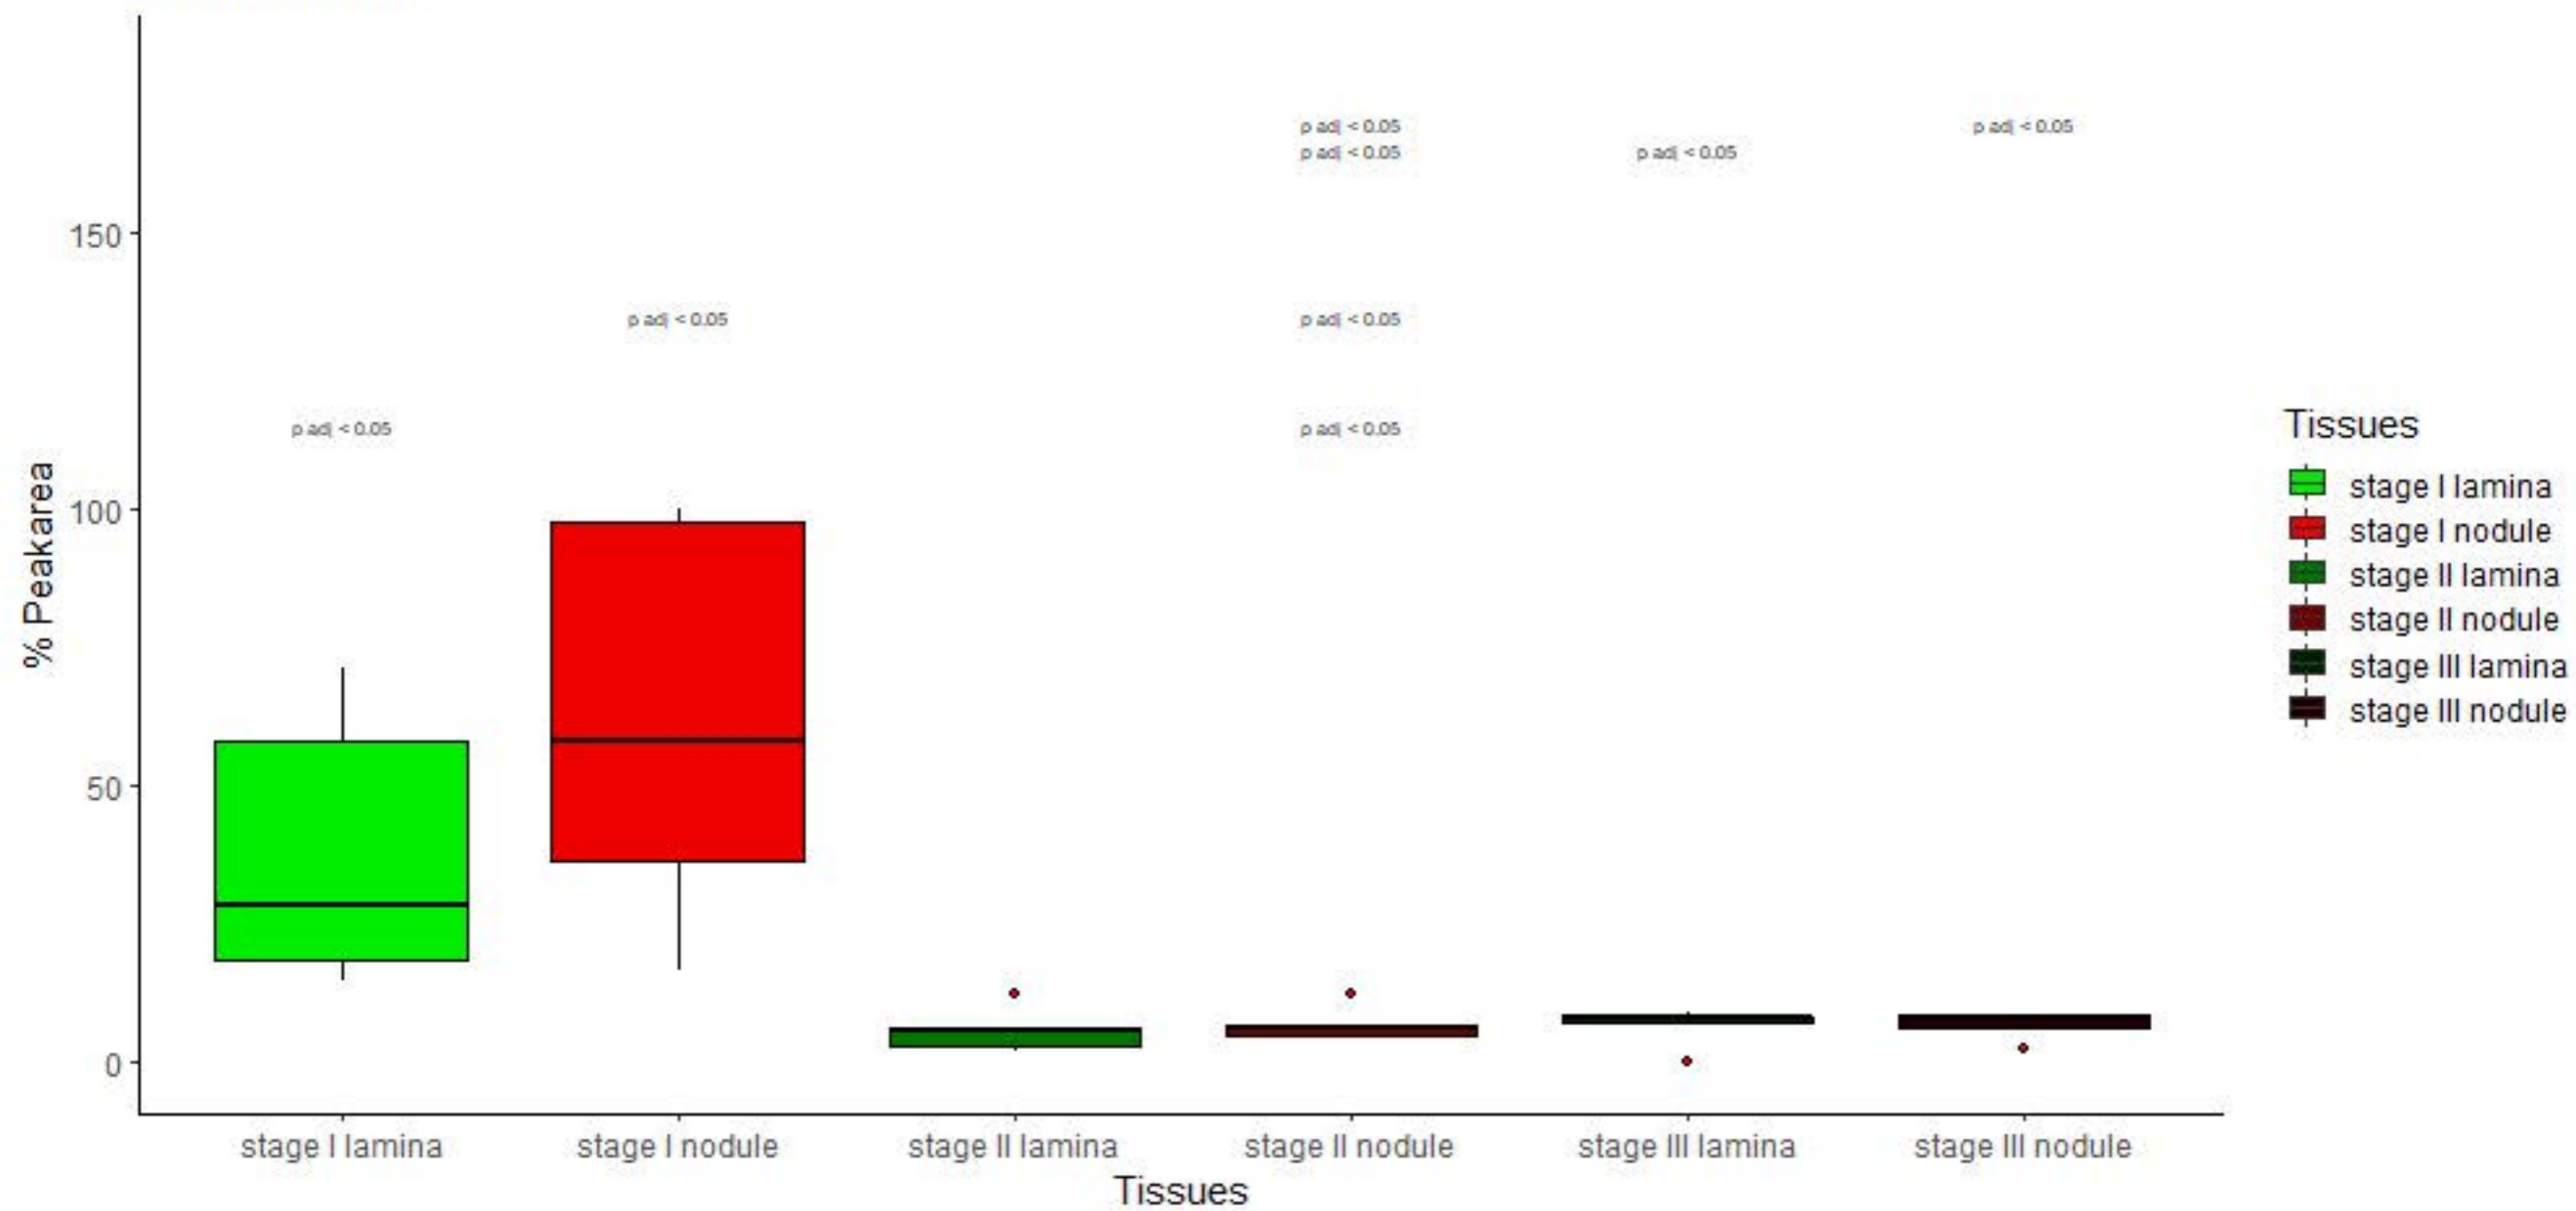

# Polyphenol ?dRI30 Epigallocatechin (6TMS)

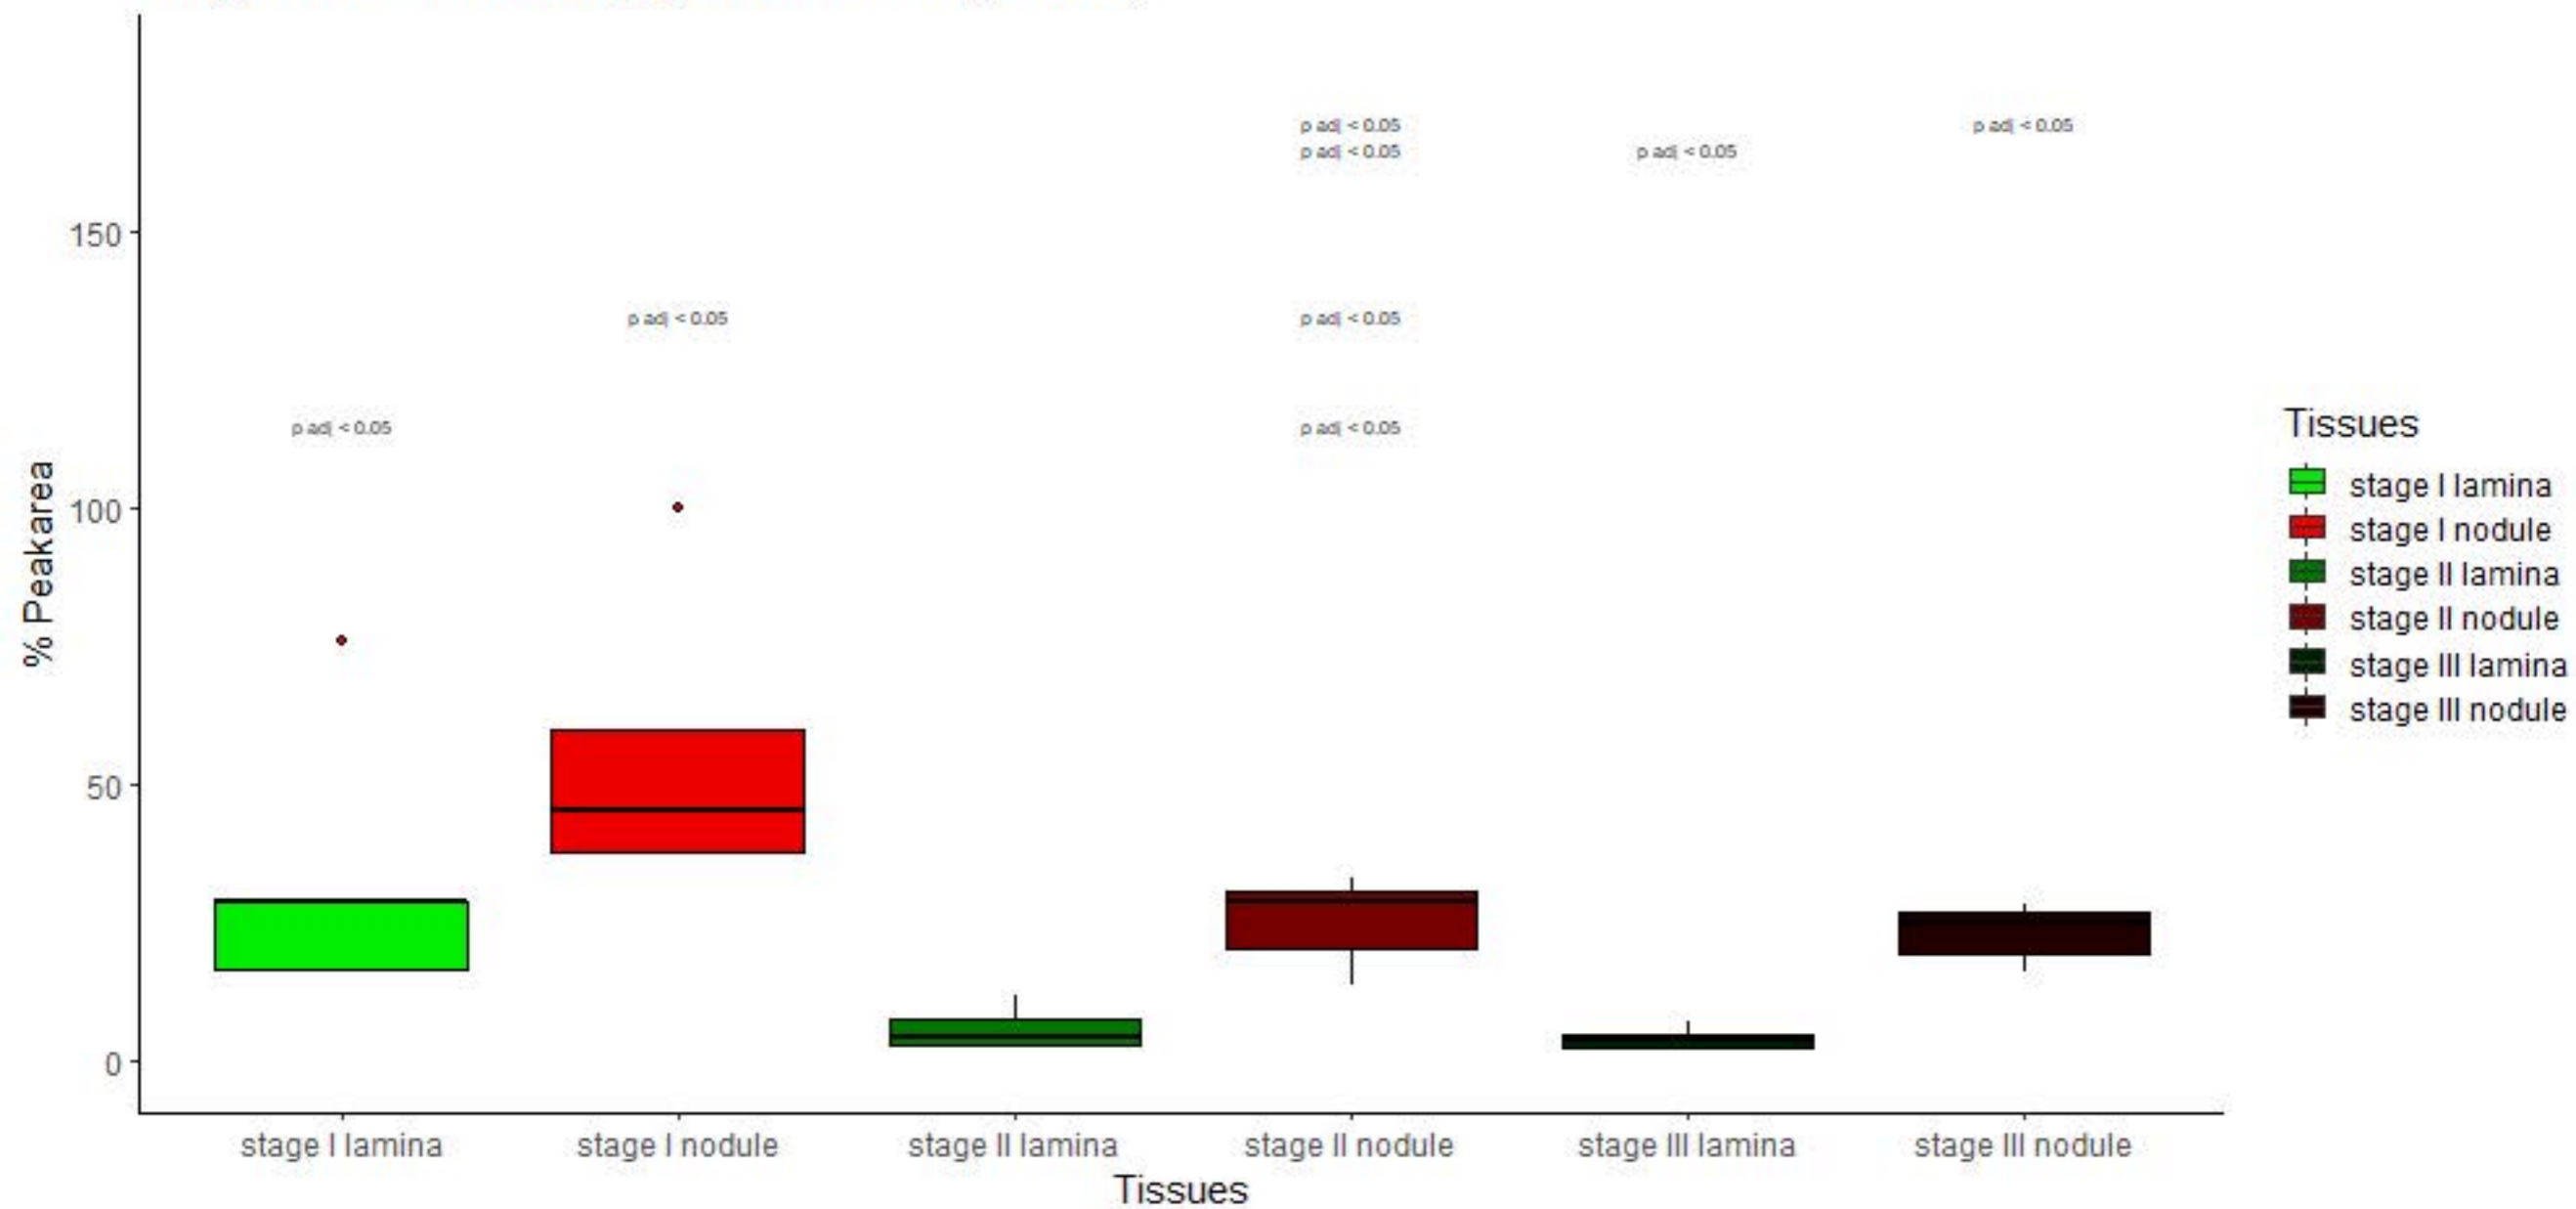

# Polyphenol RI 2900 ?dRI56 Catechin/Epicatechin (5TMS)

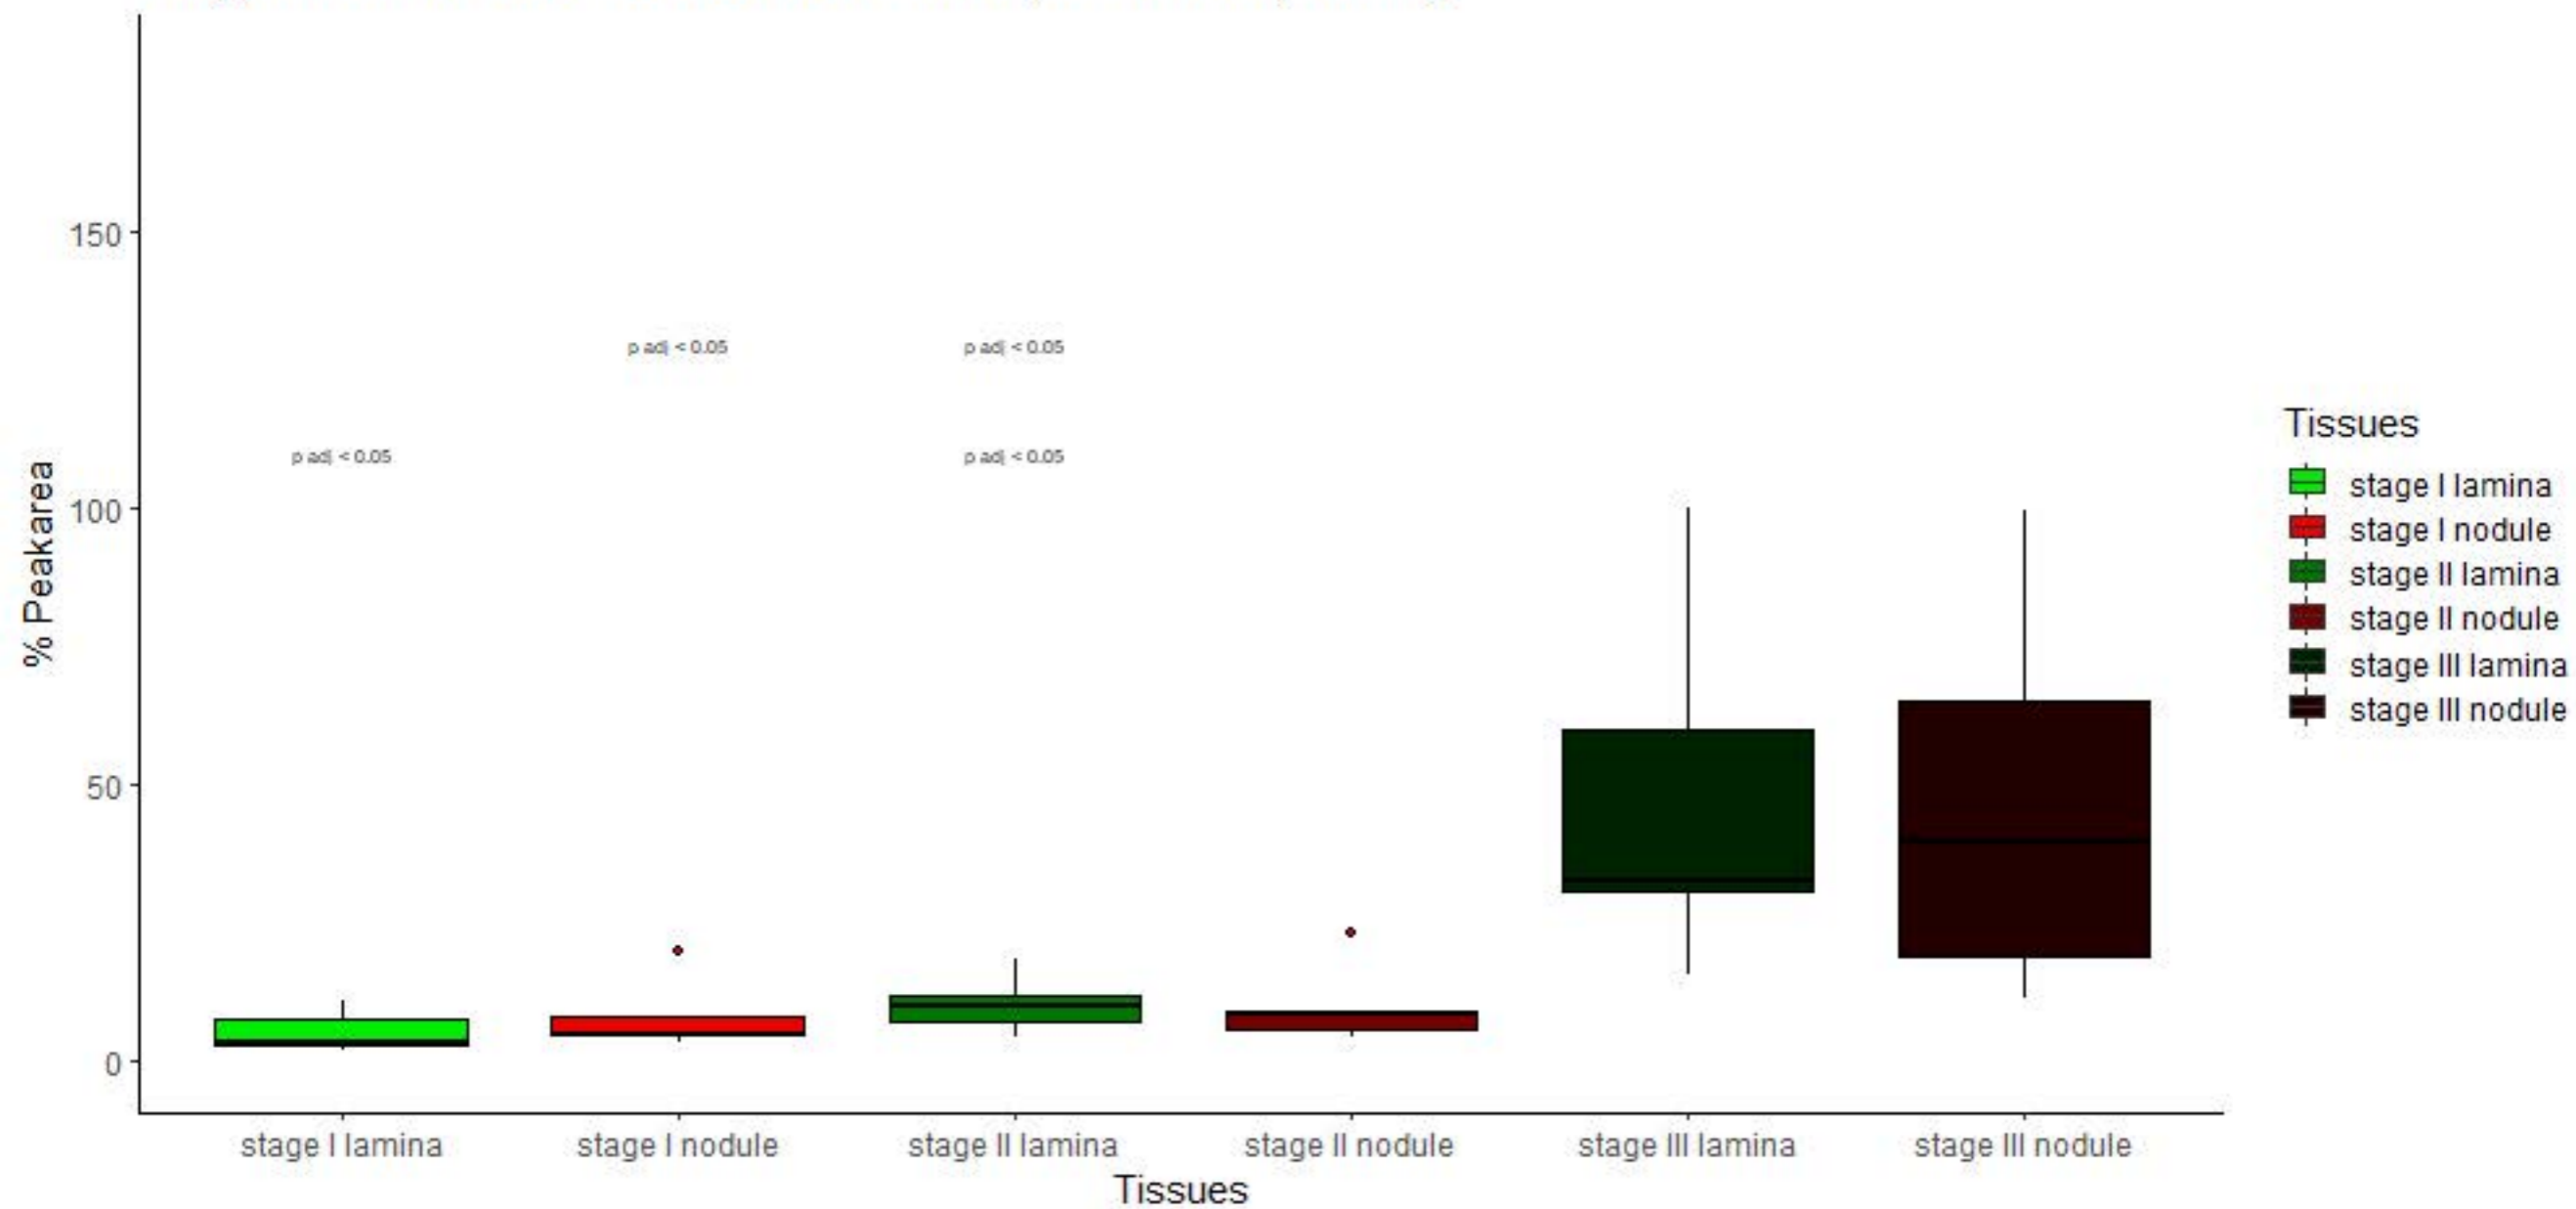





# Pyridine, 2-hydroxy-

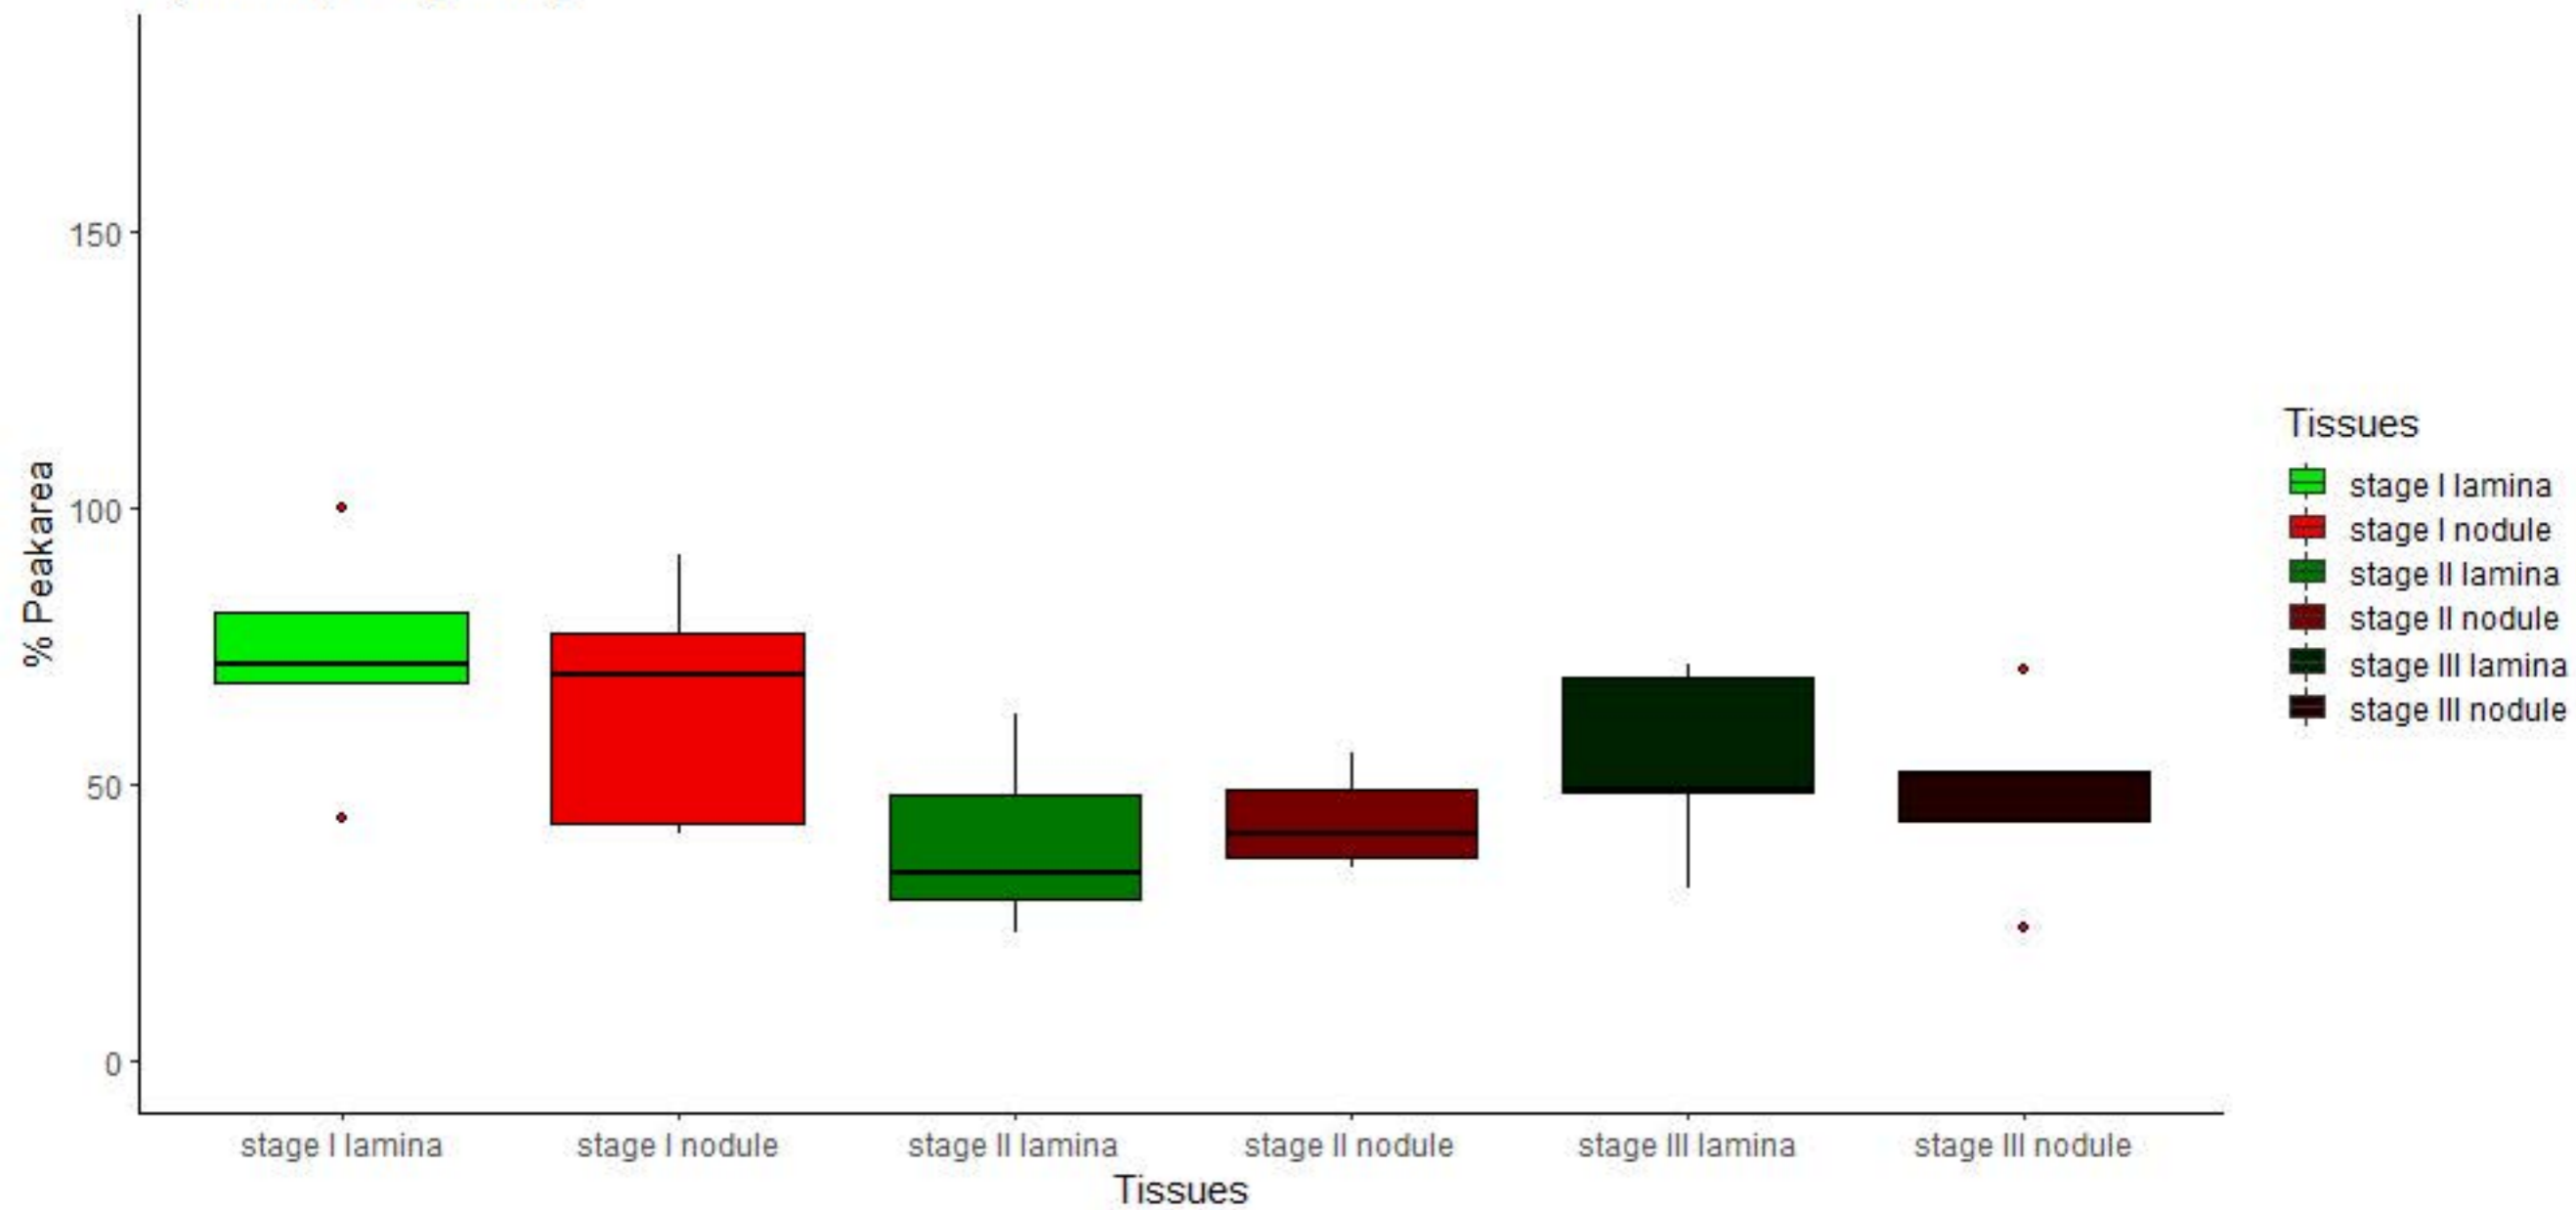

# Tocopherol, alpha-

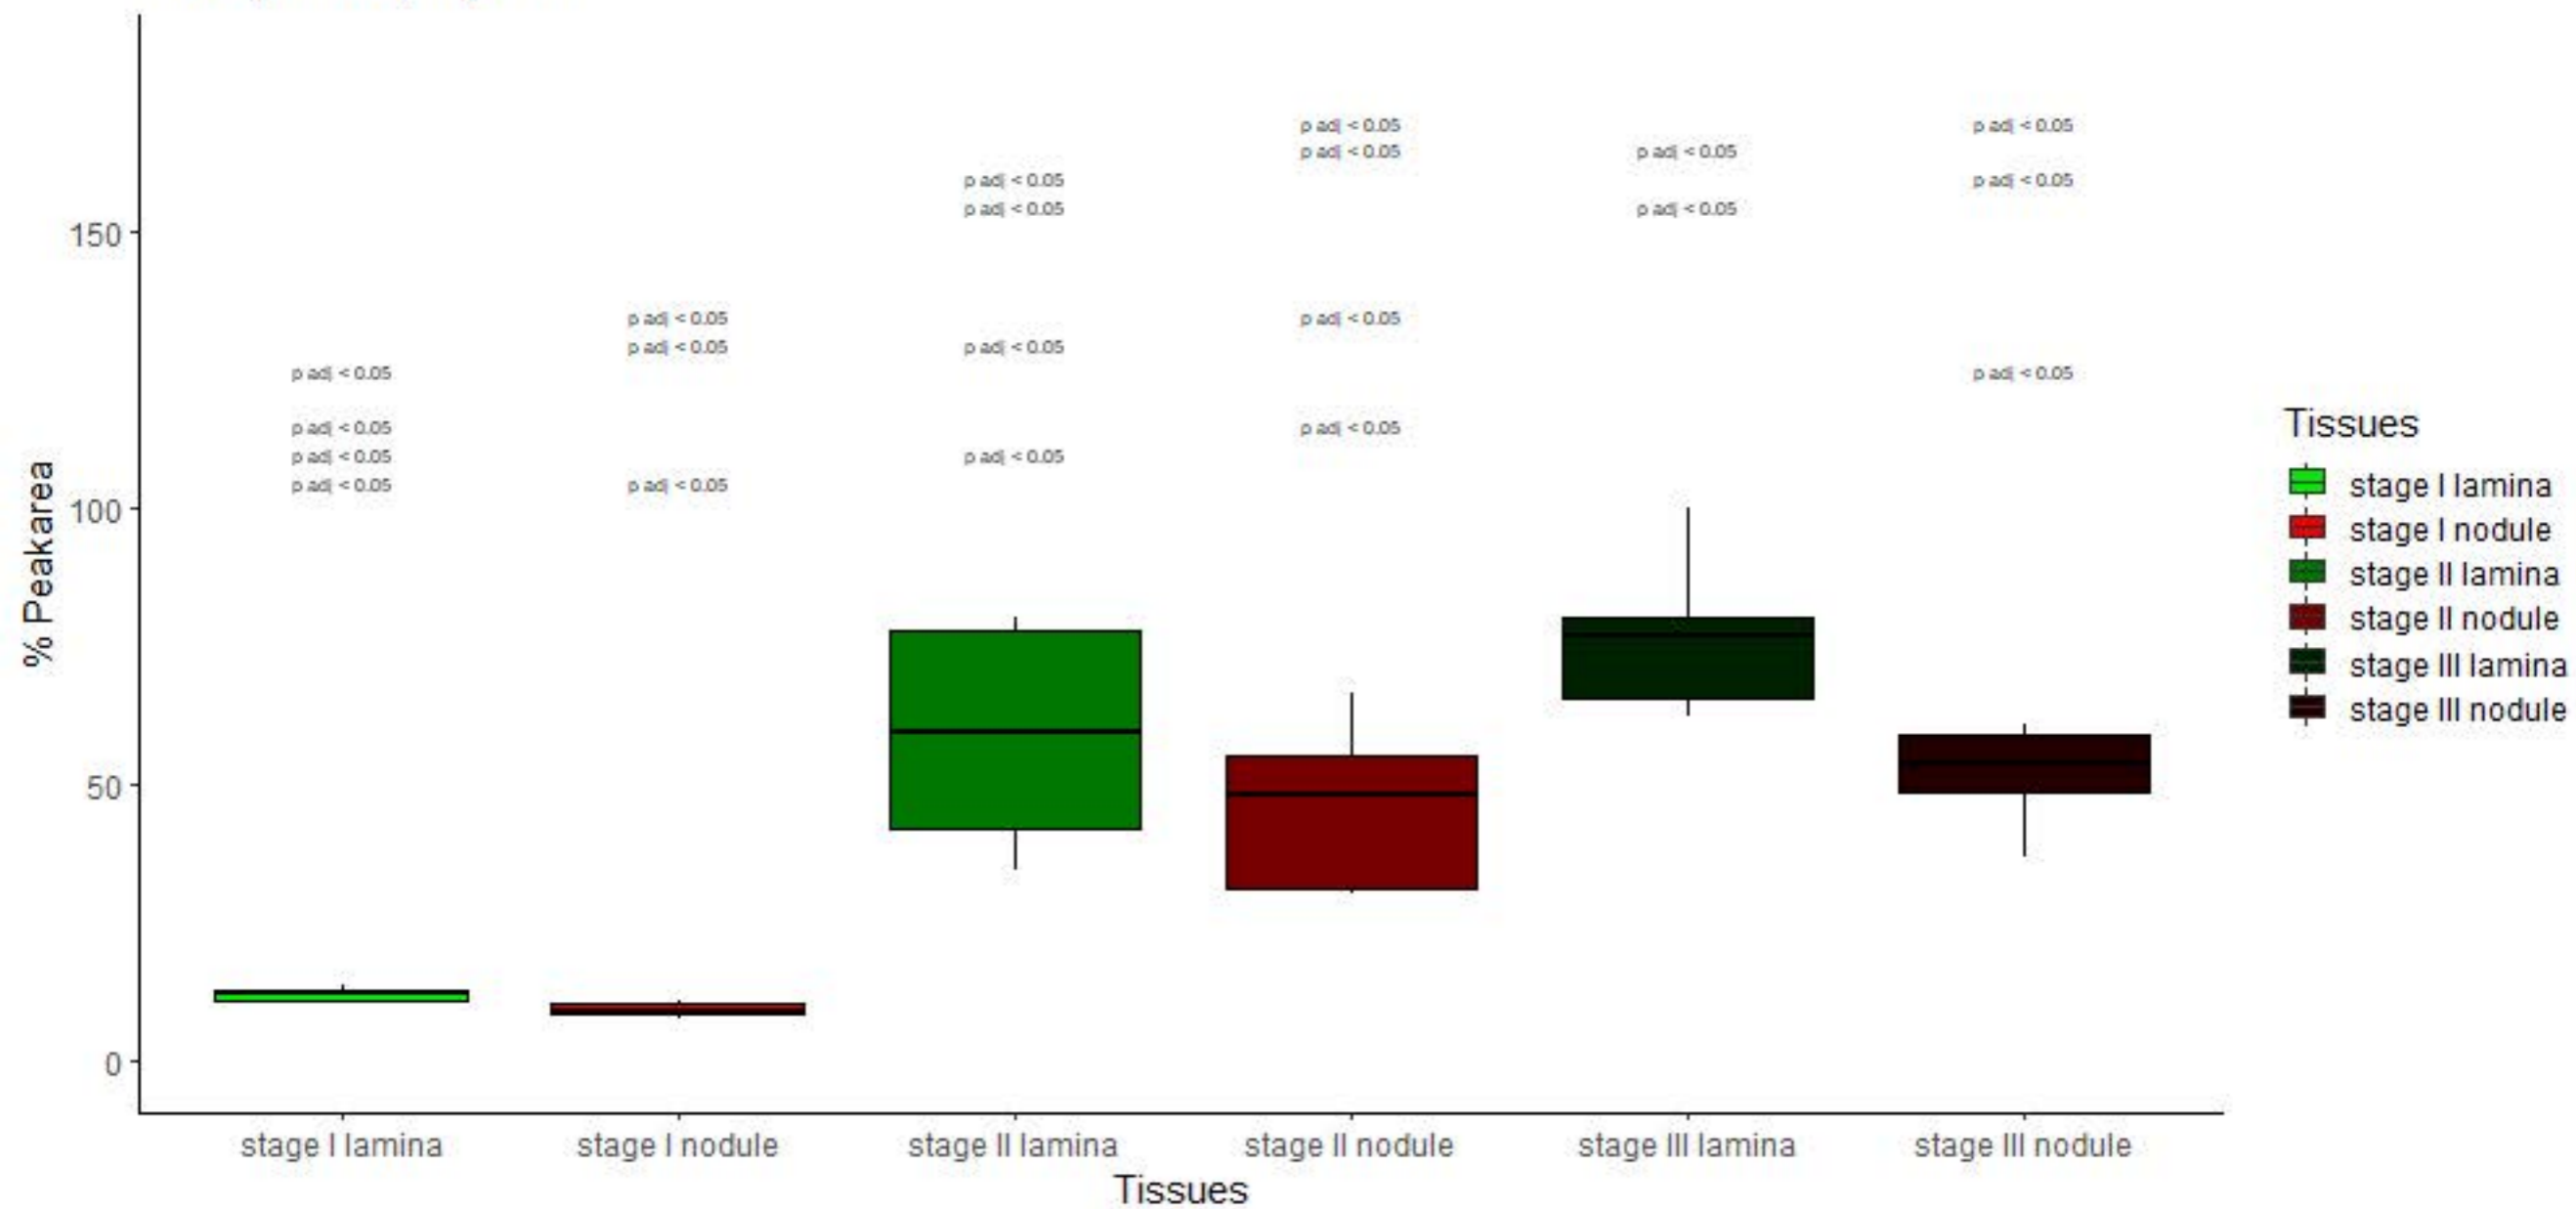

# Phytol BP

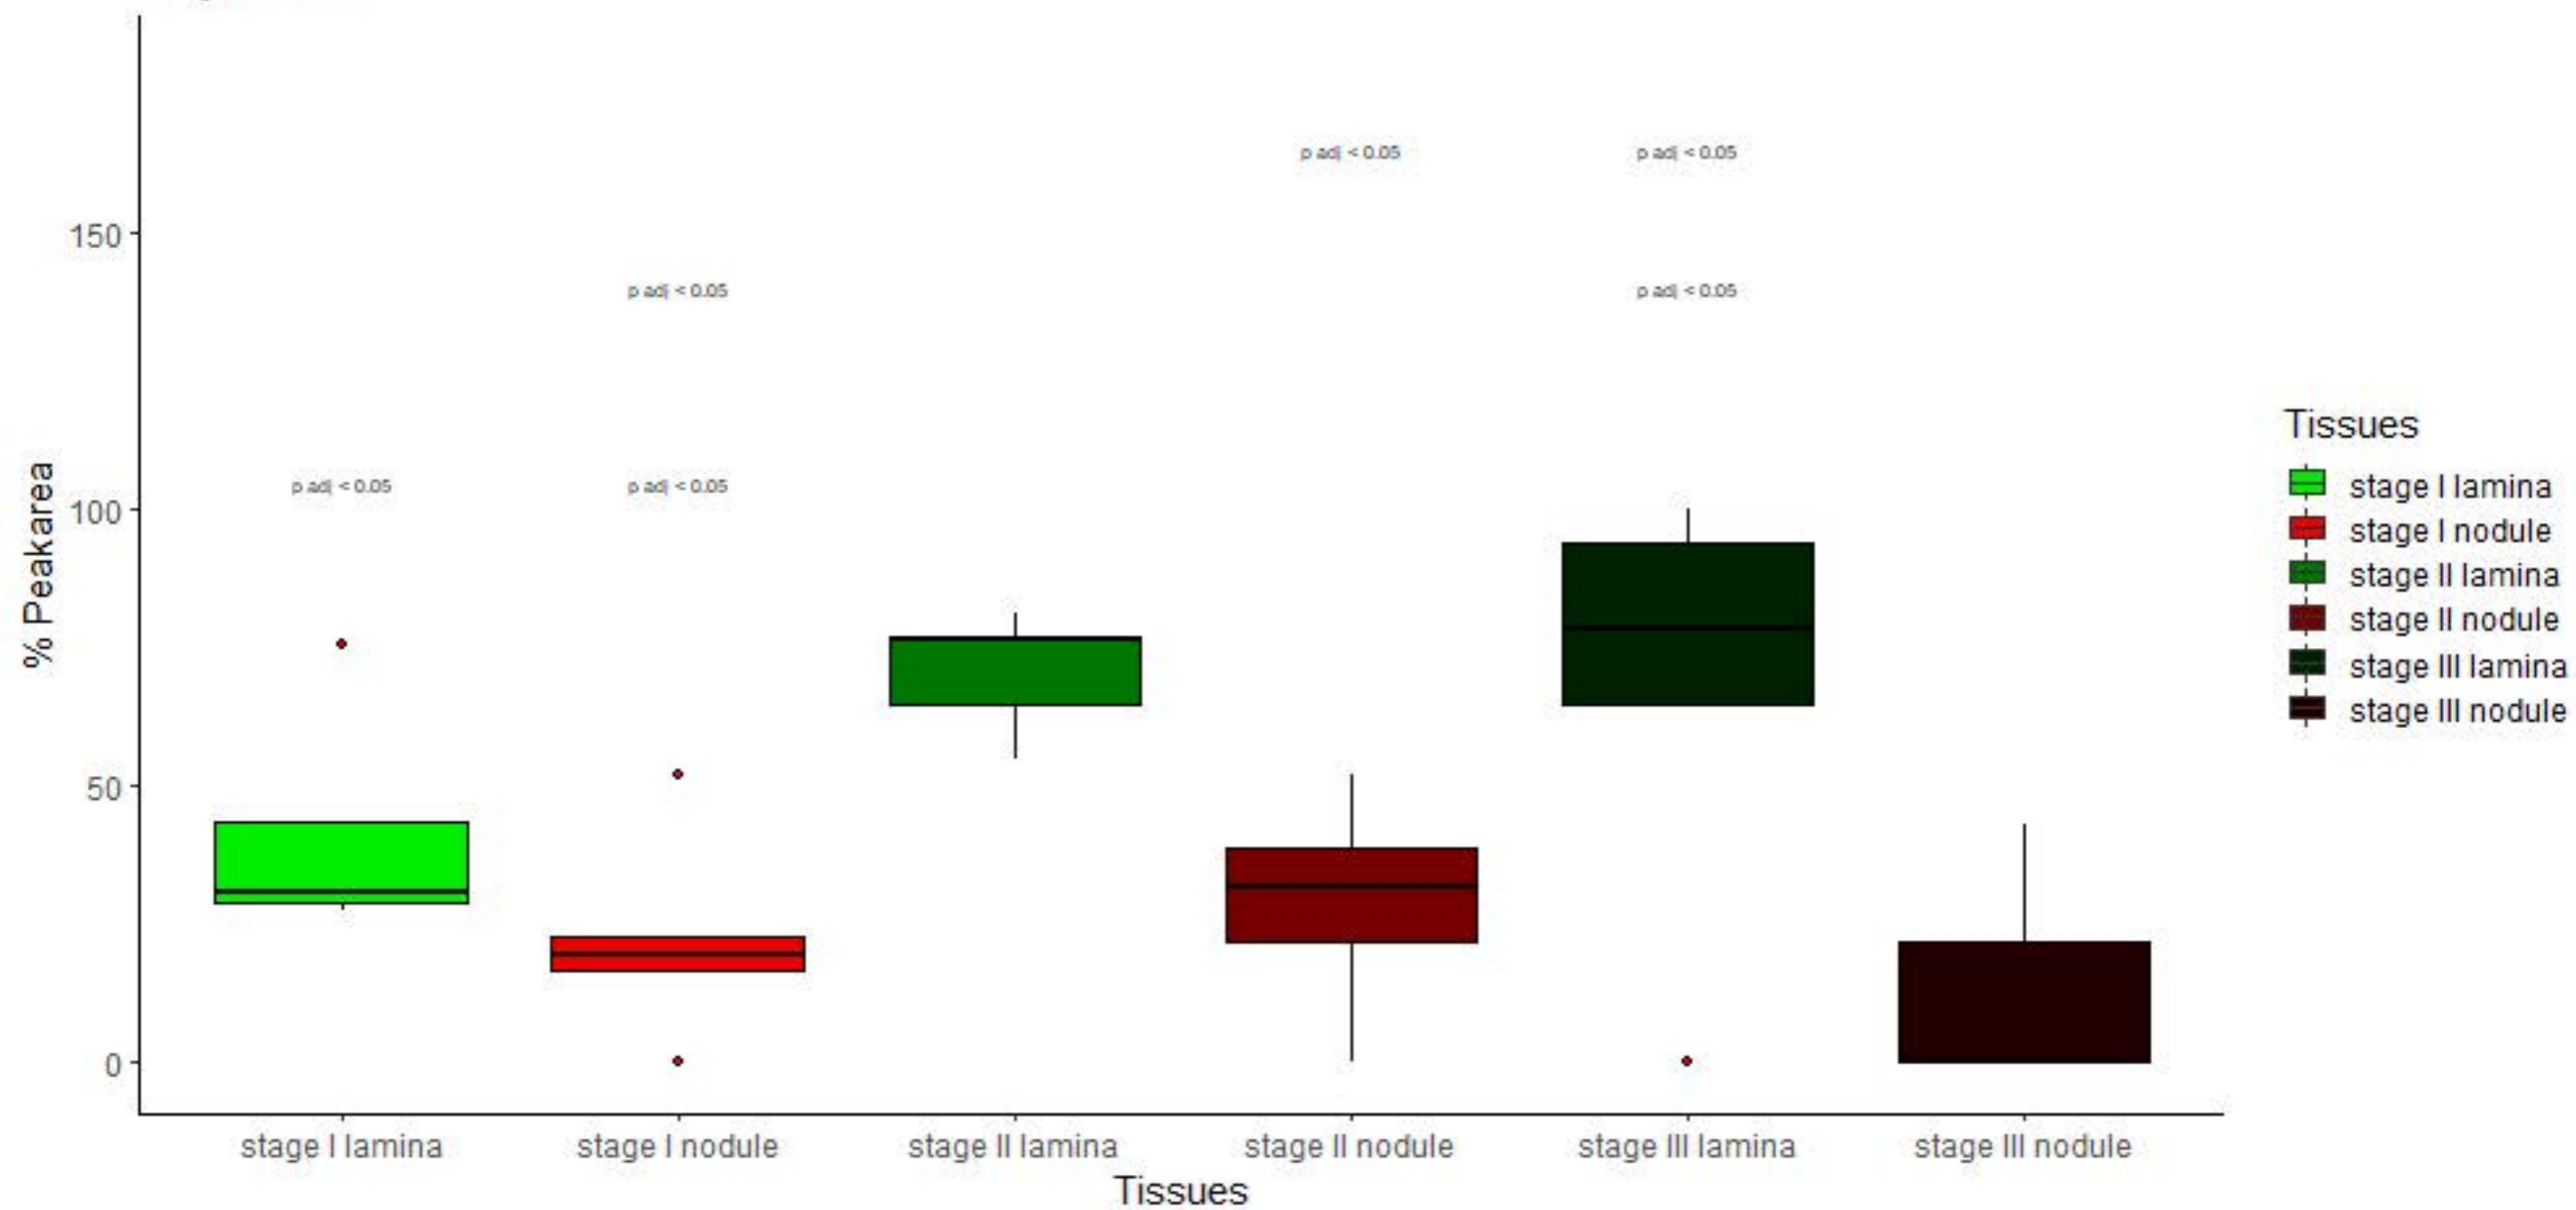

## ART RI\_1184

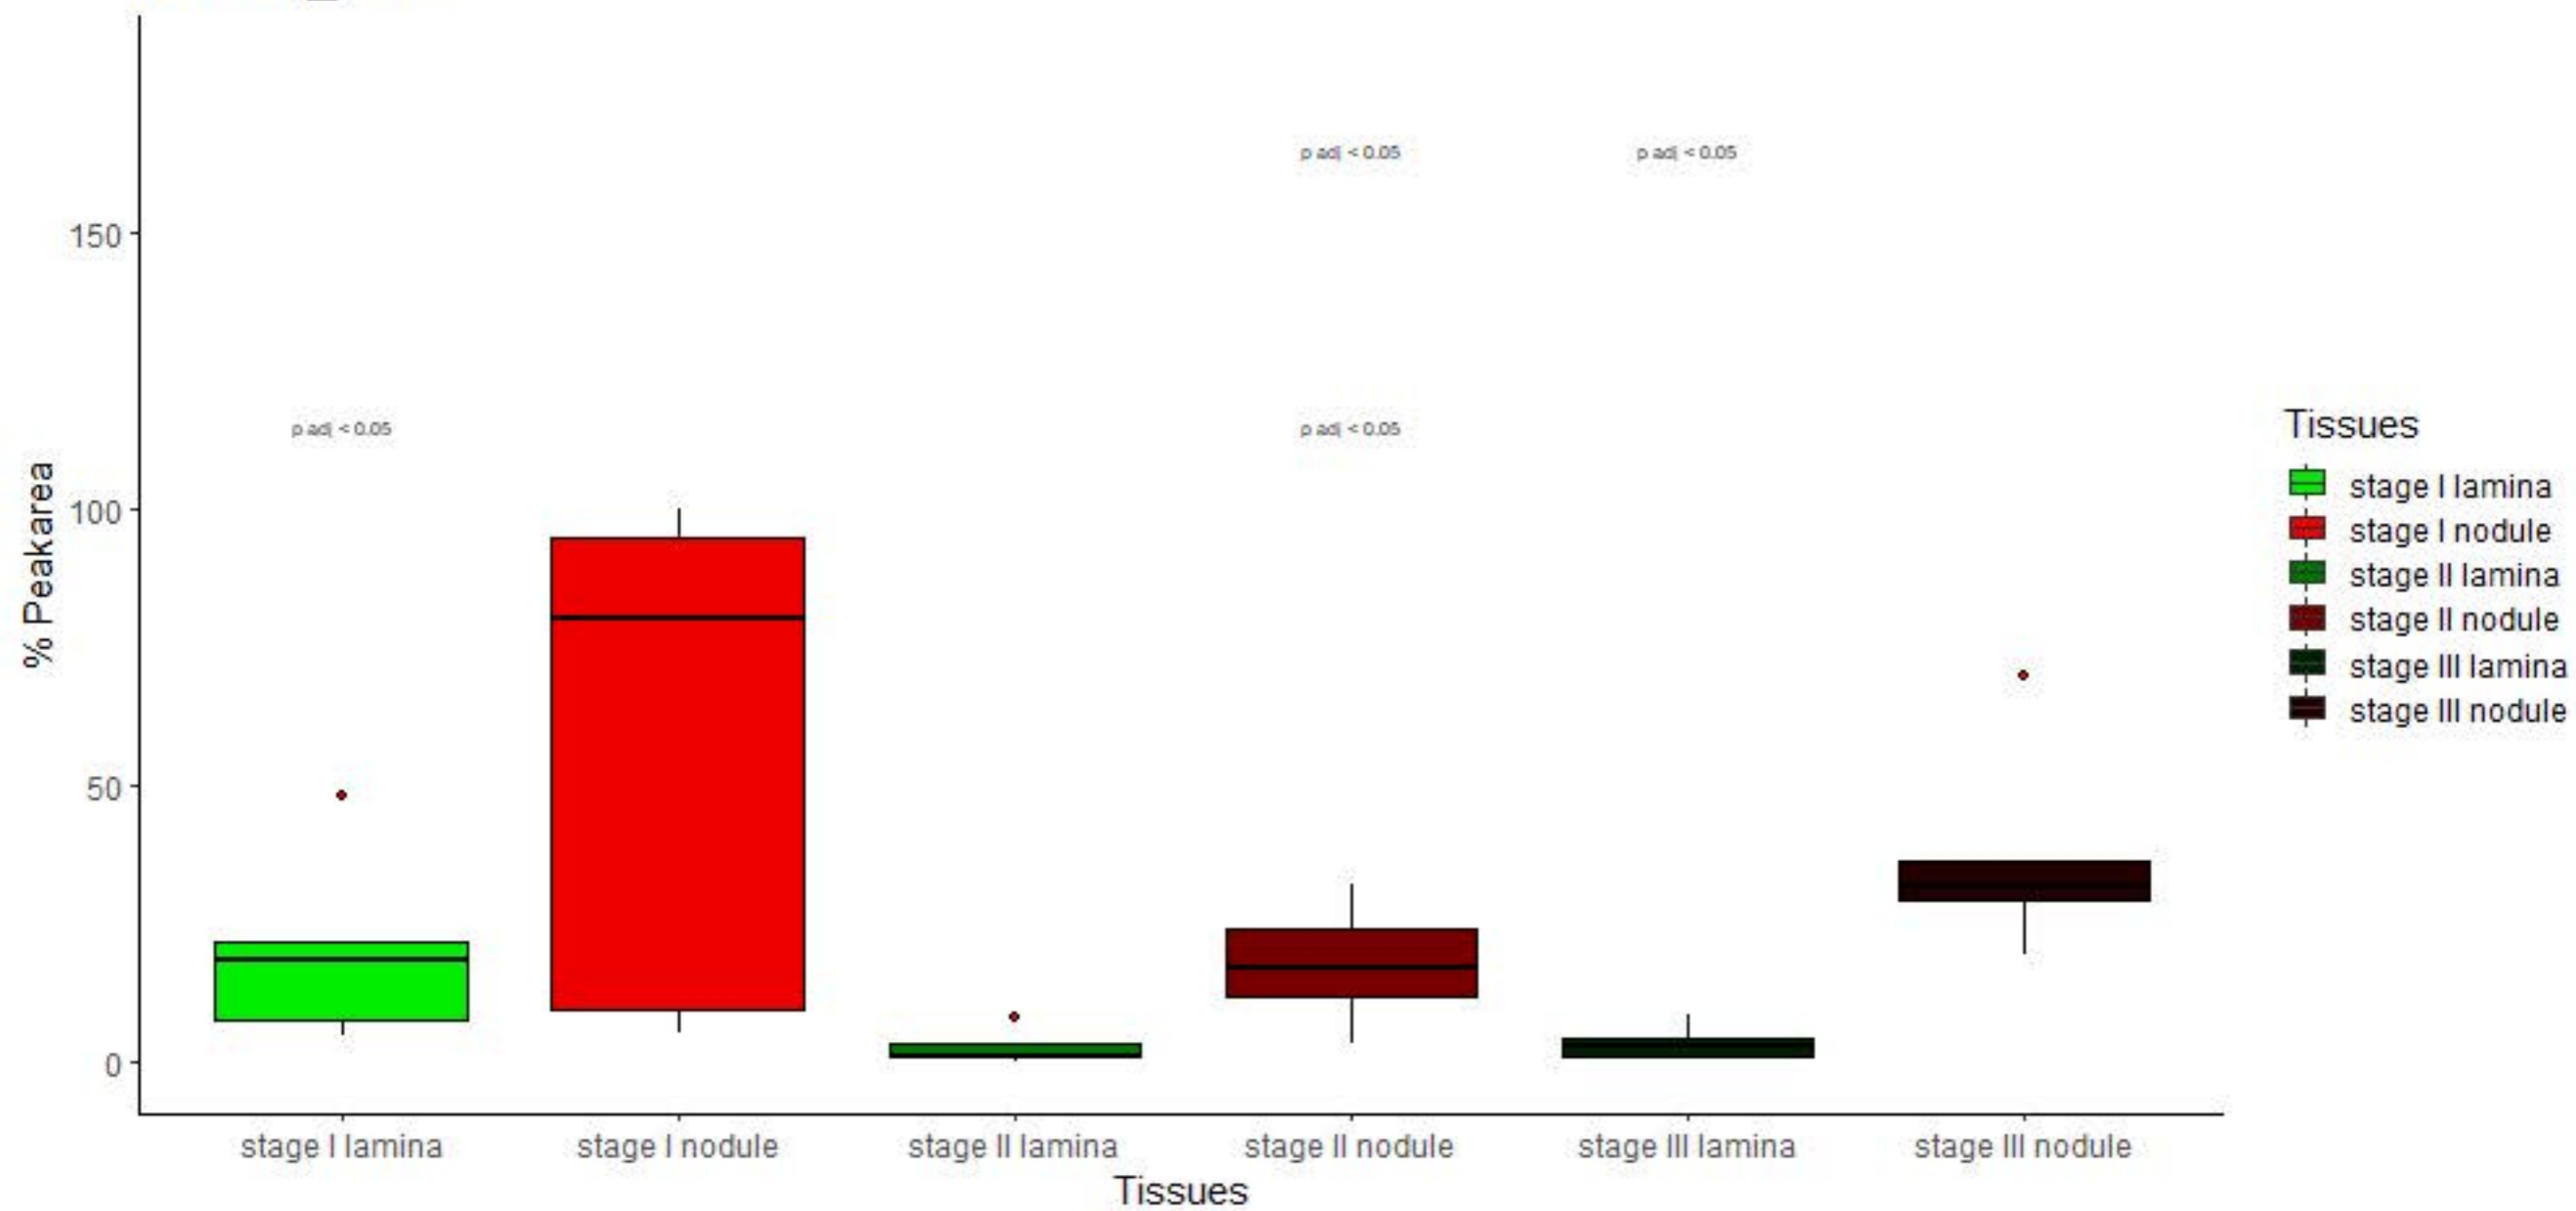

## Unknown#bth-pae-001

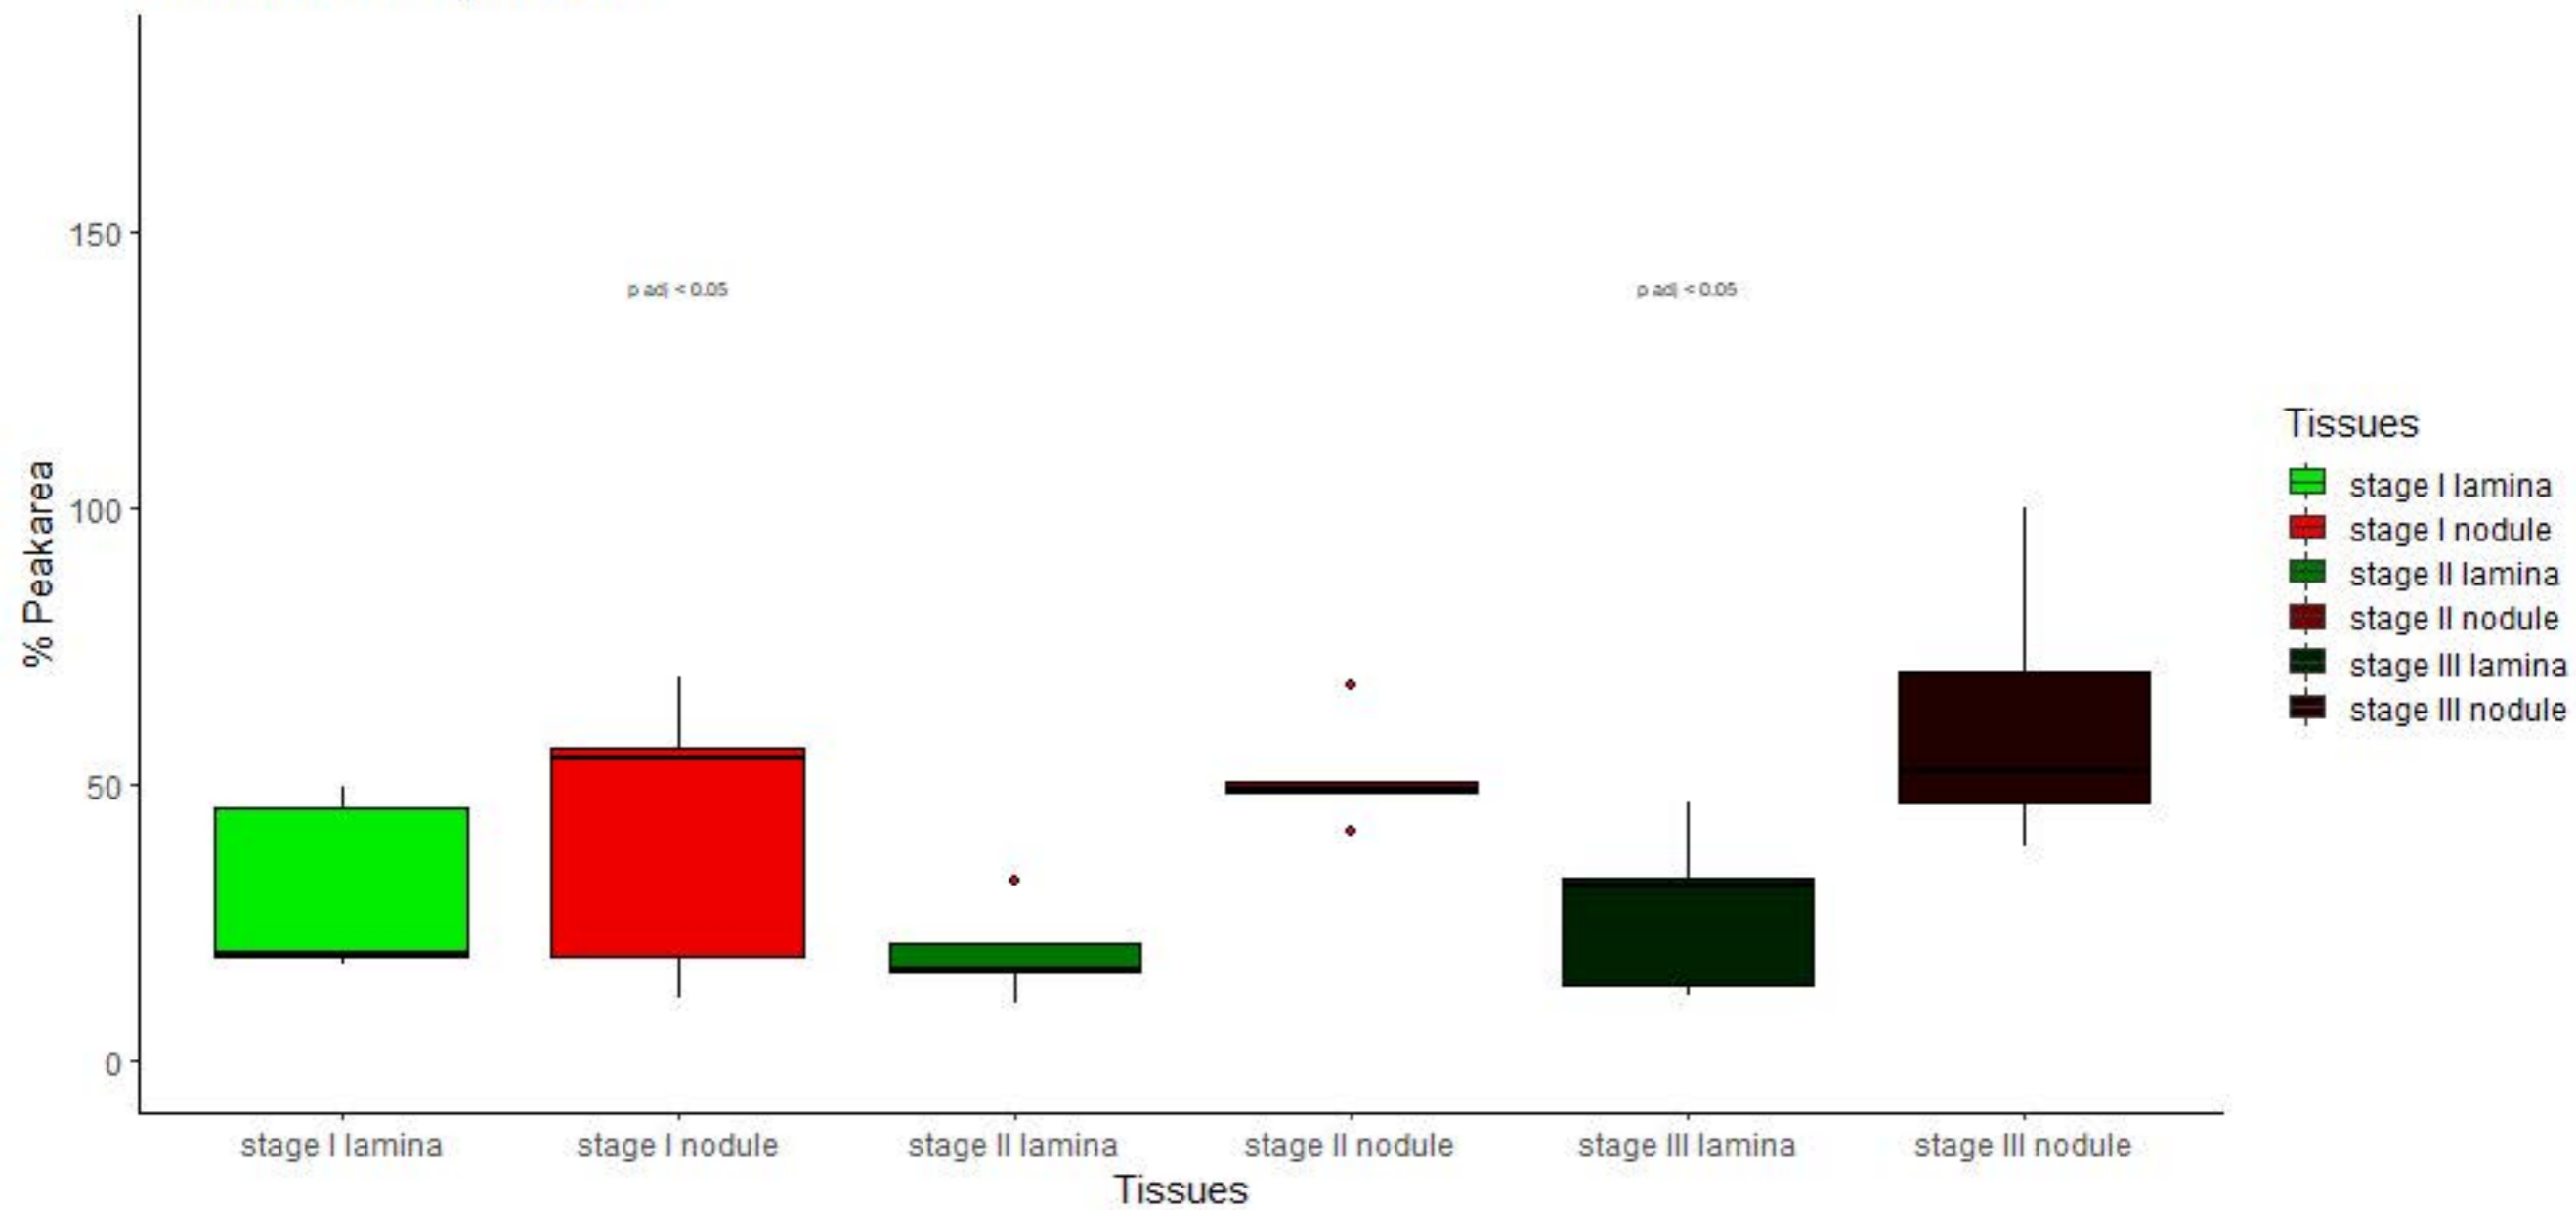

## EITTMS\_N12C\_ATHR\_1585.2\_1135EC44

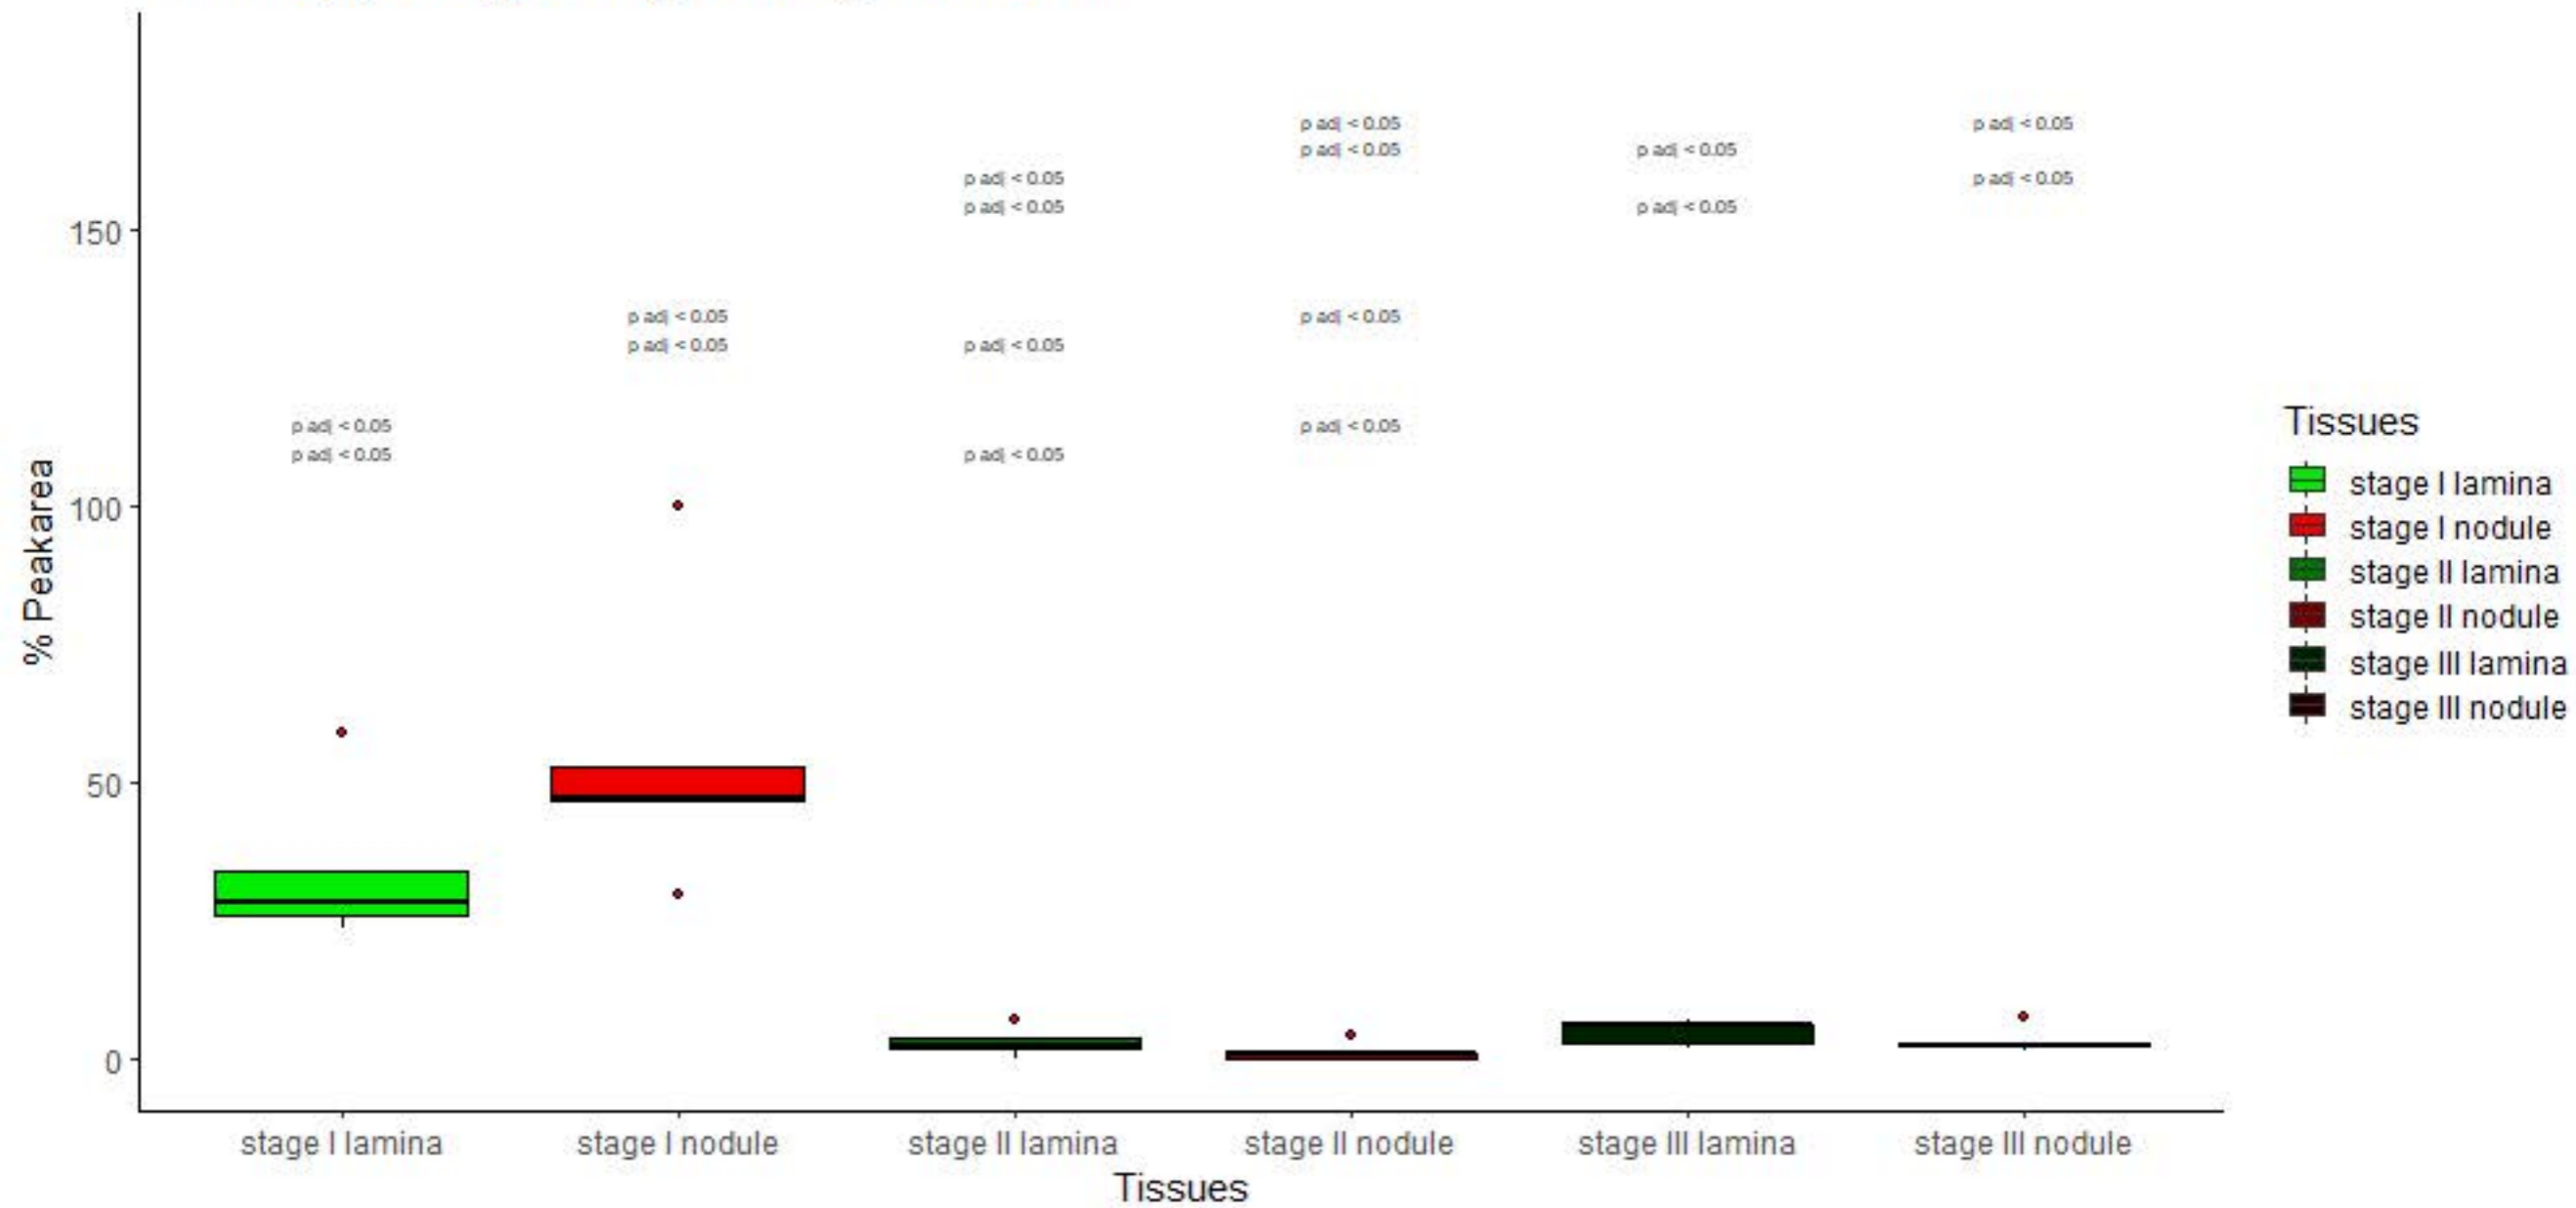

# NA 110 Fatty acid

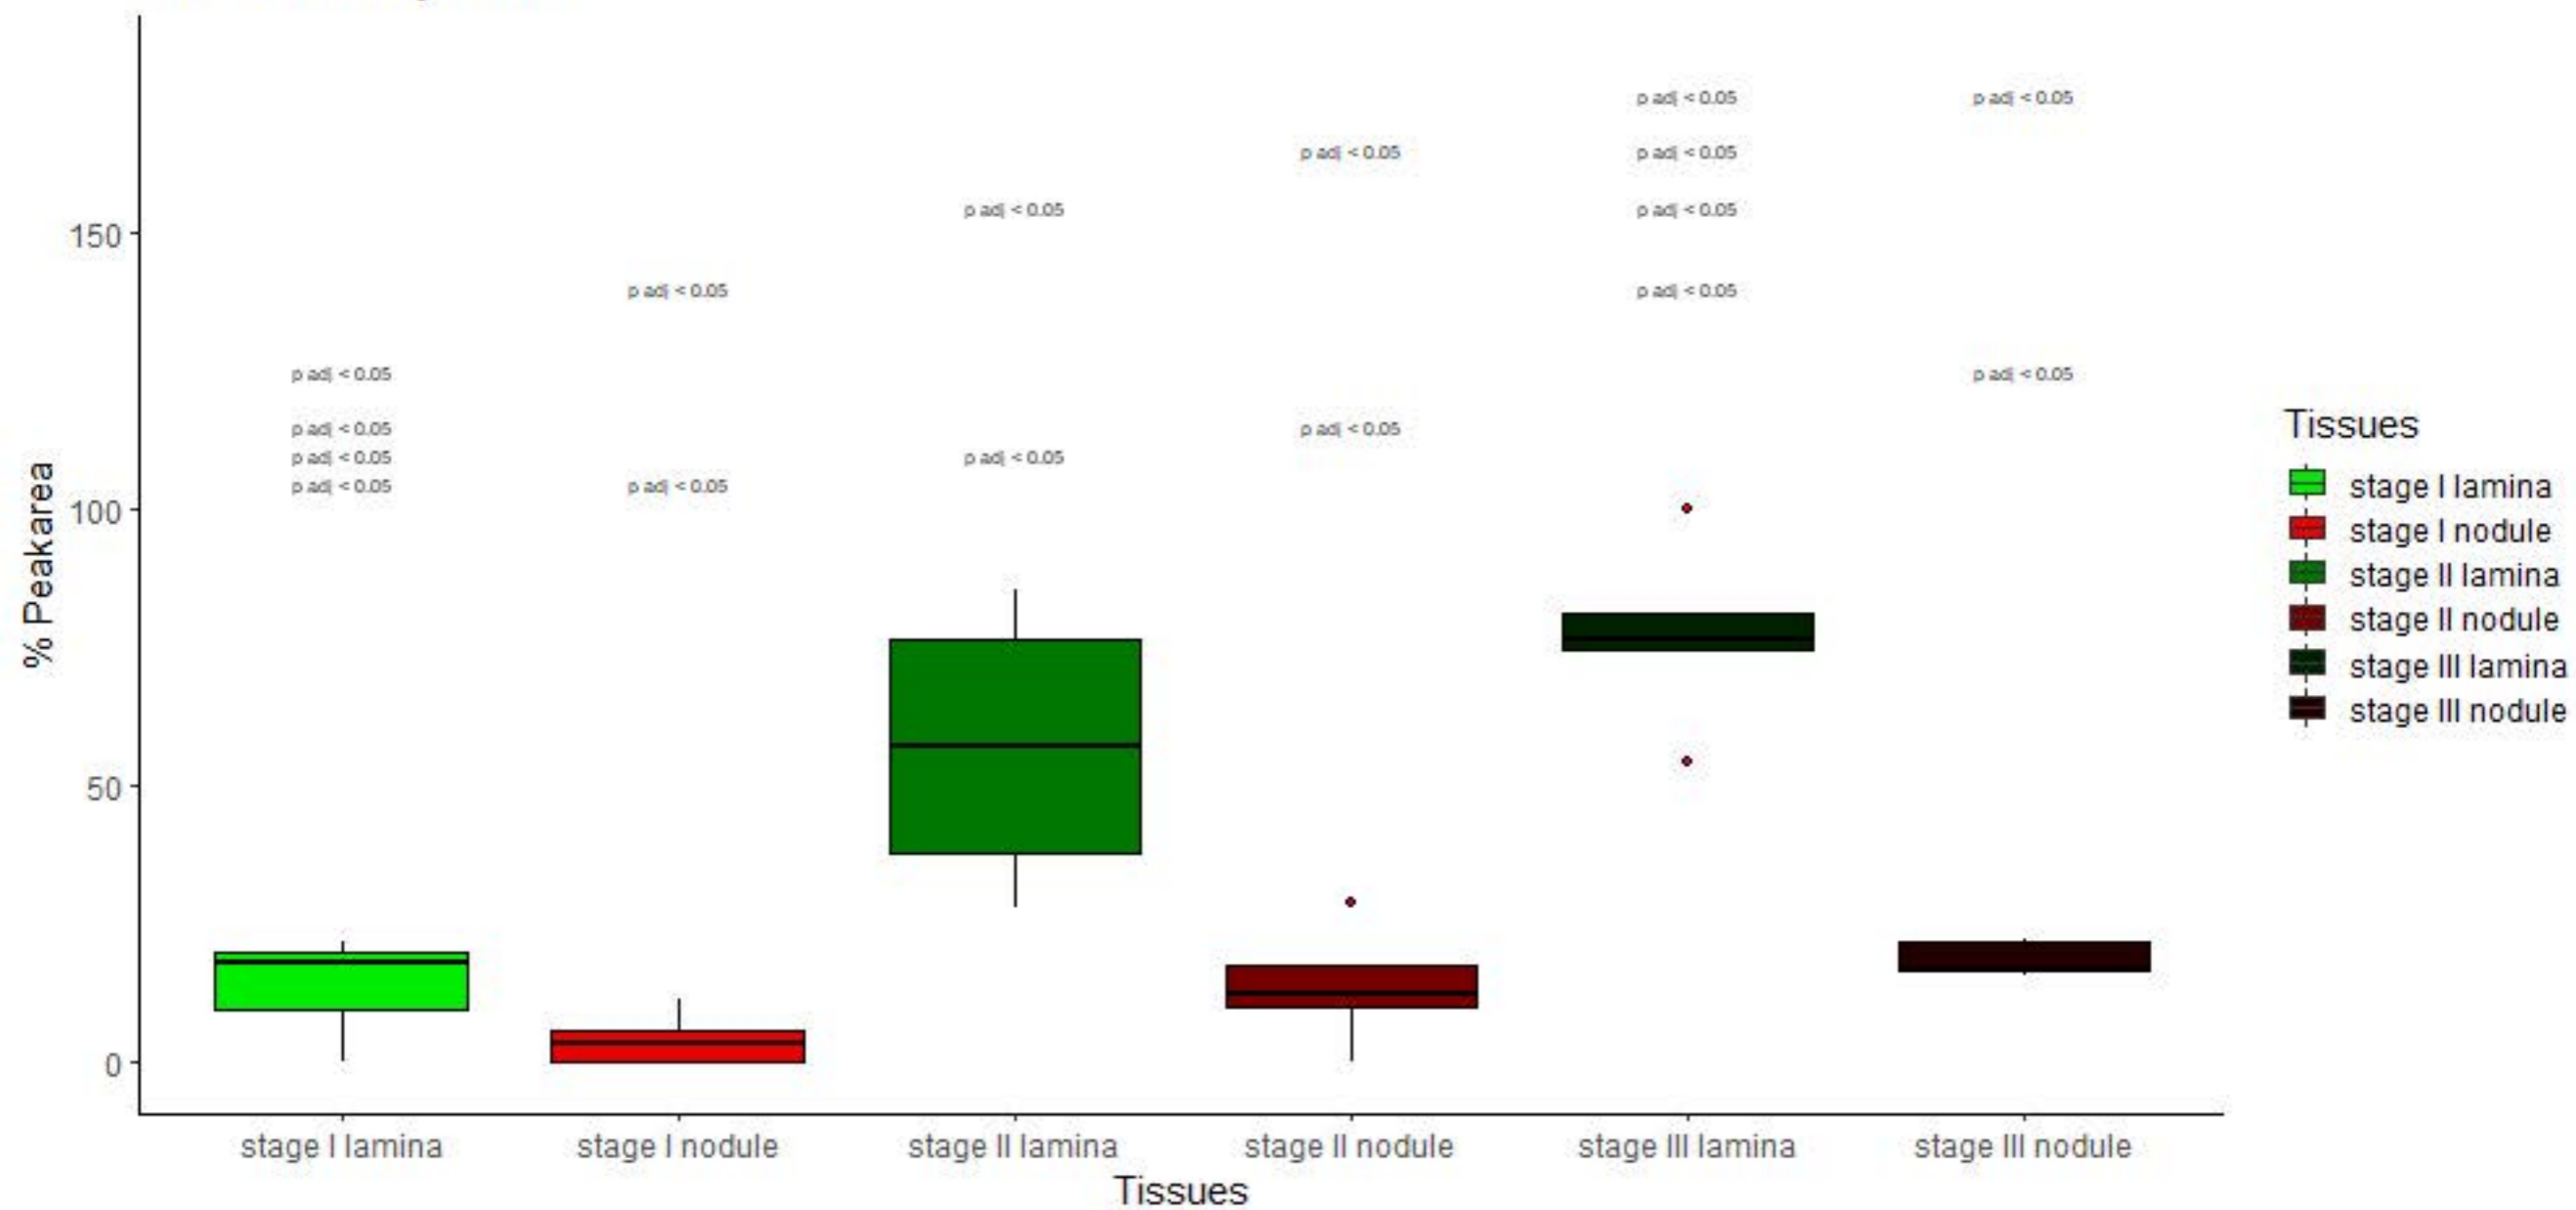

# NA 111 Fatty acid

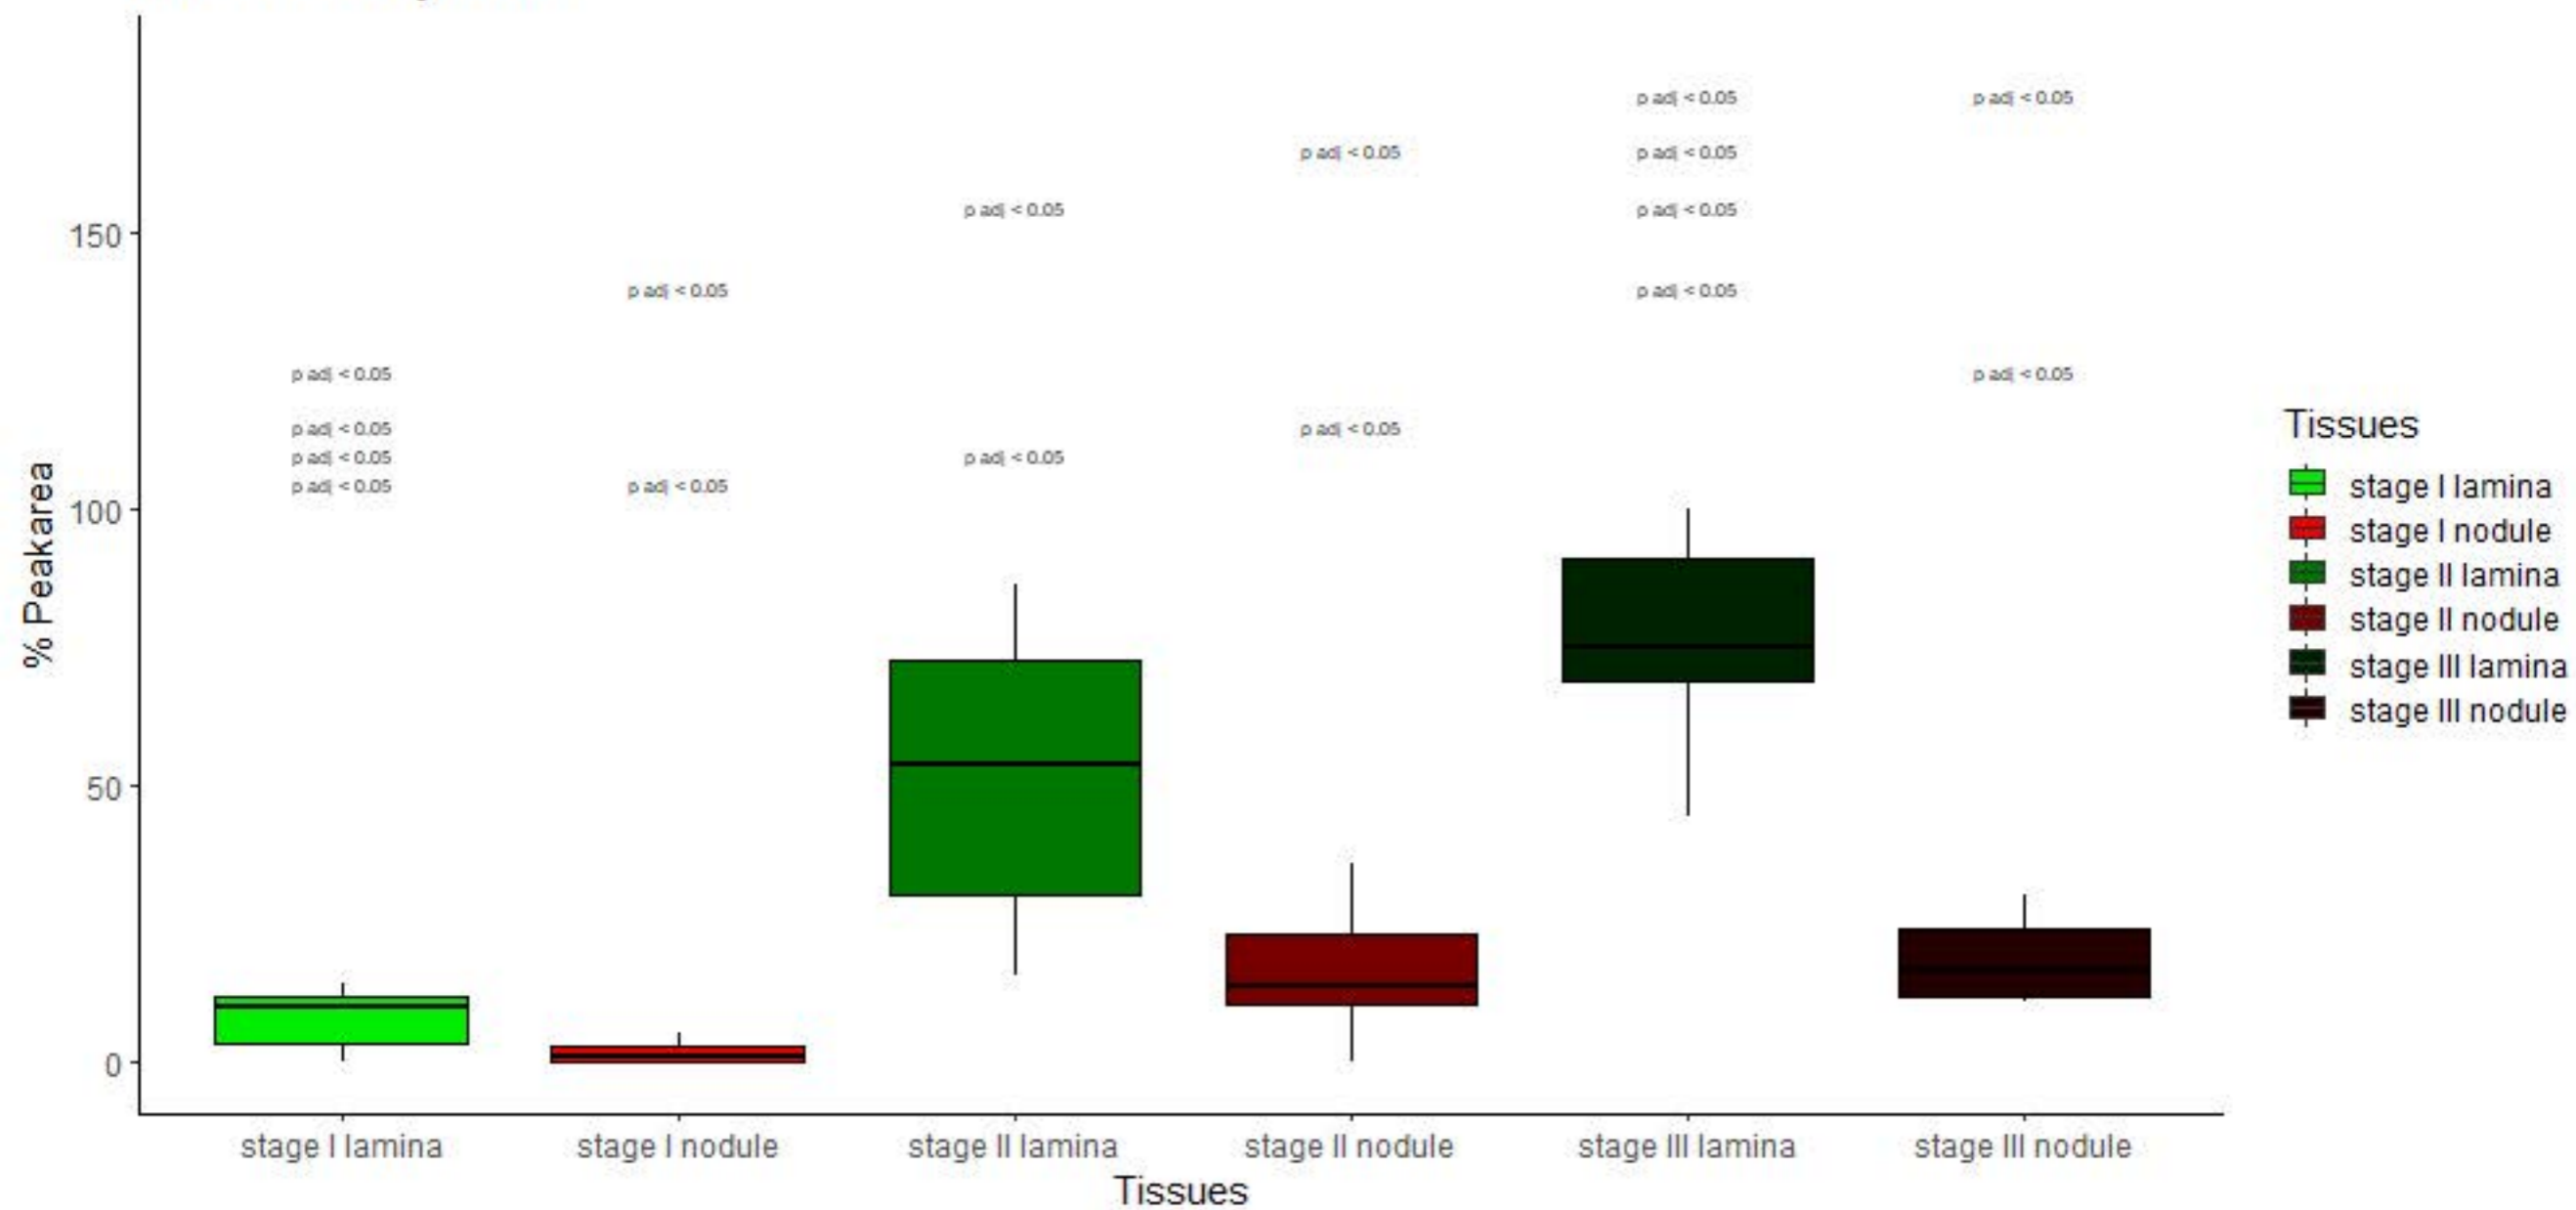



# NA Lipid/FA 140

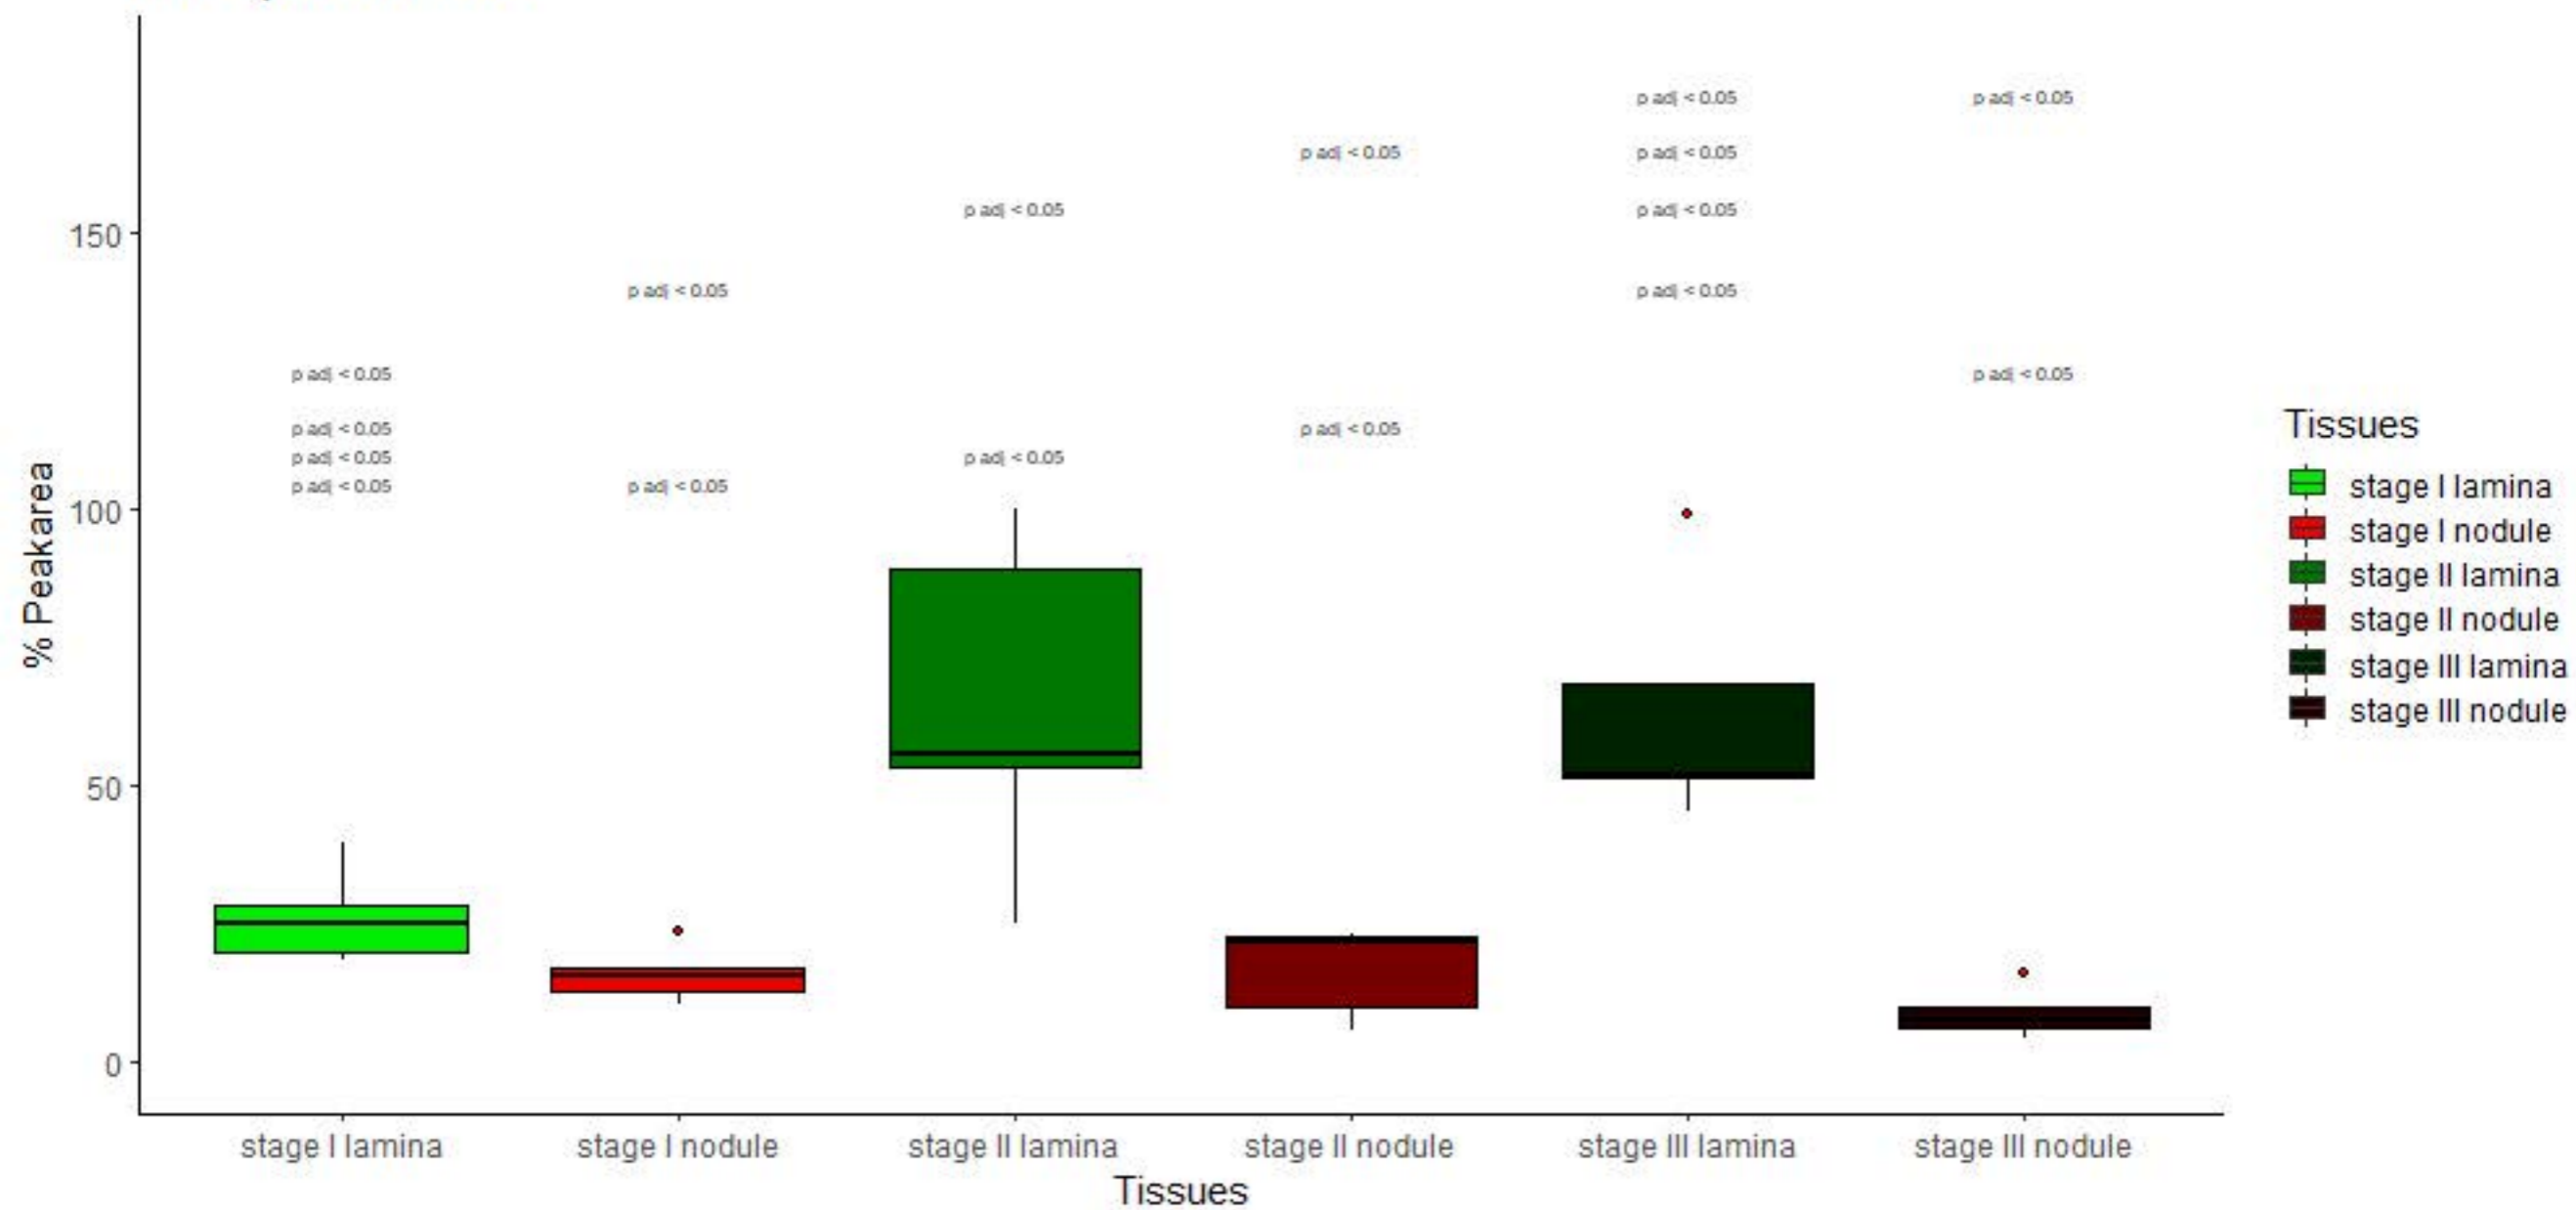

# NA Lipid/FA 139

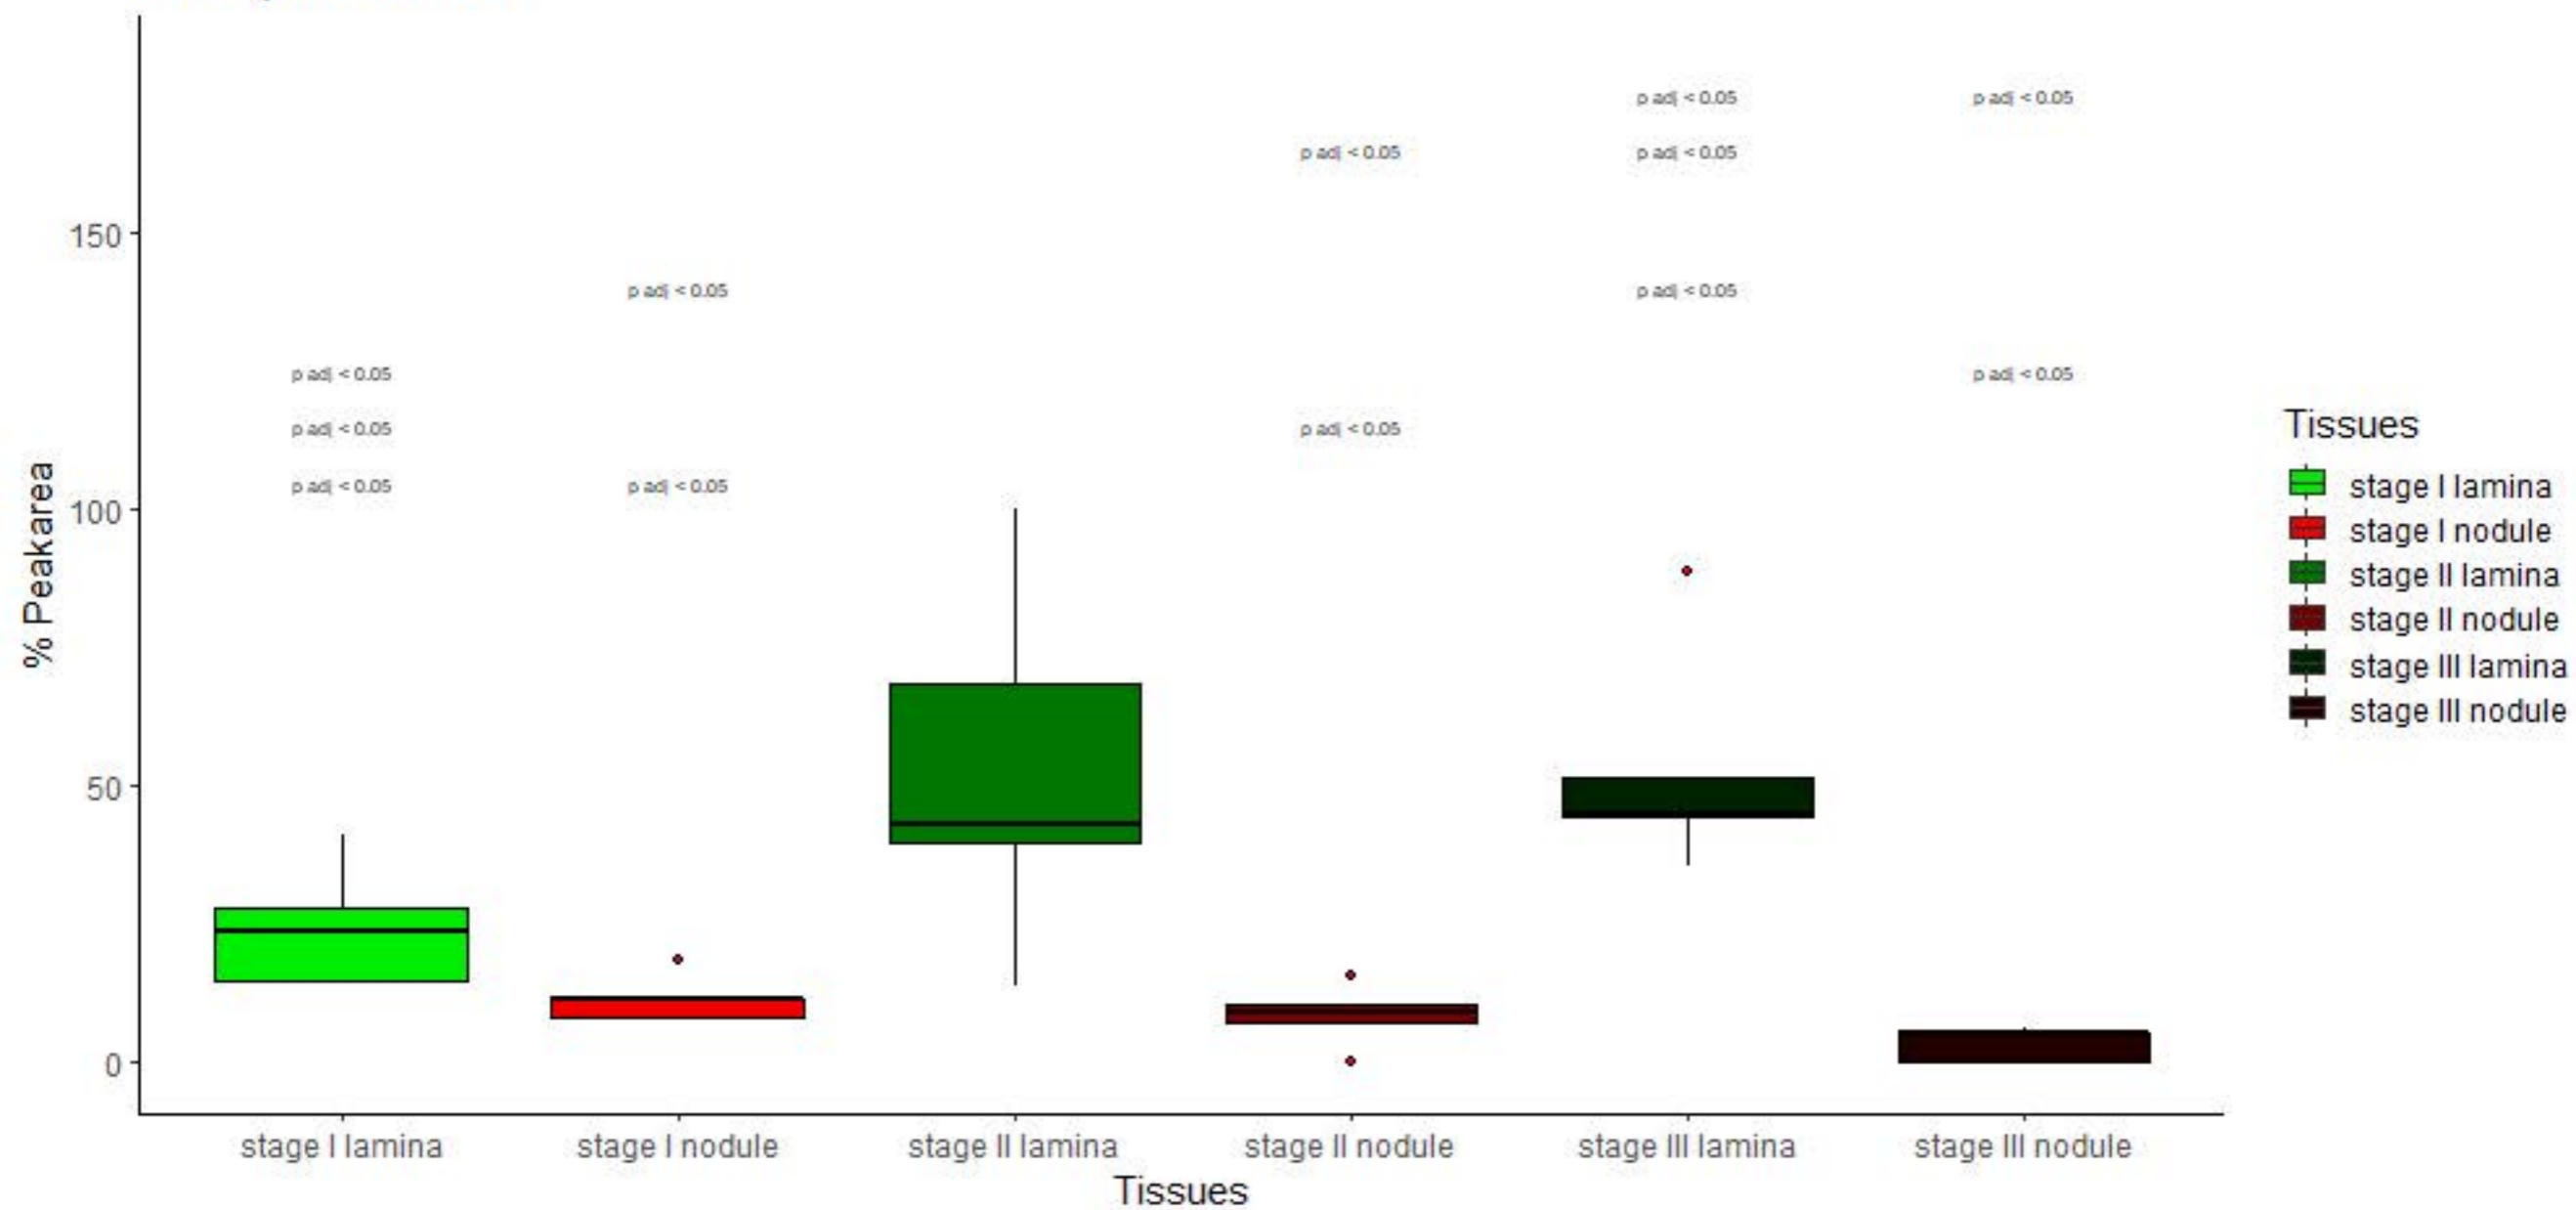

# NA Lipid/FA 141

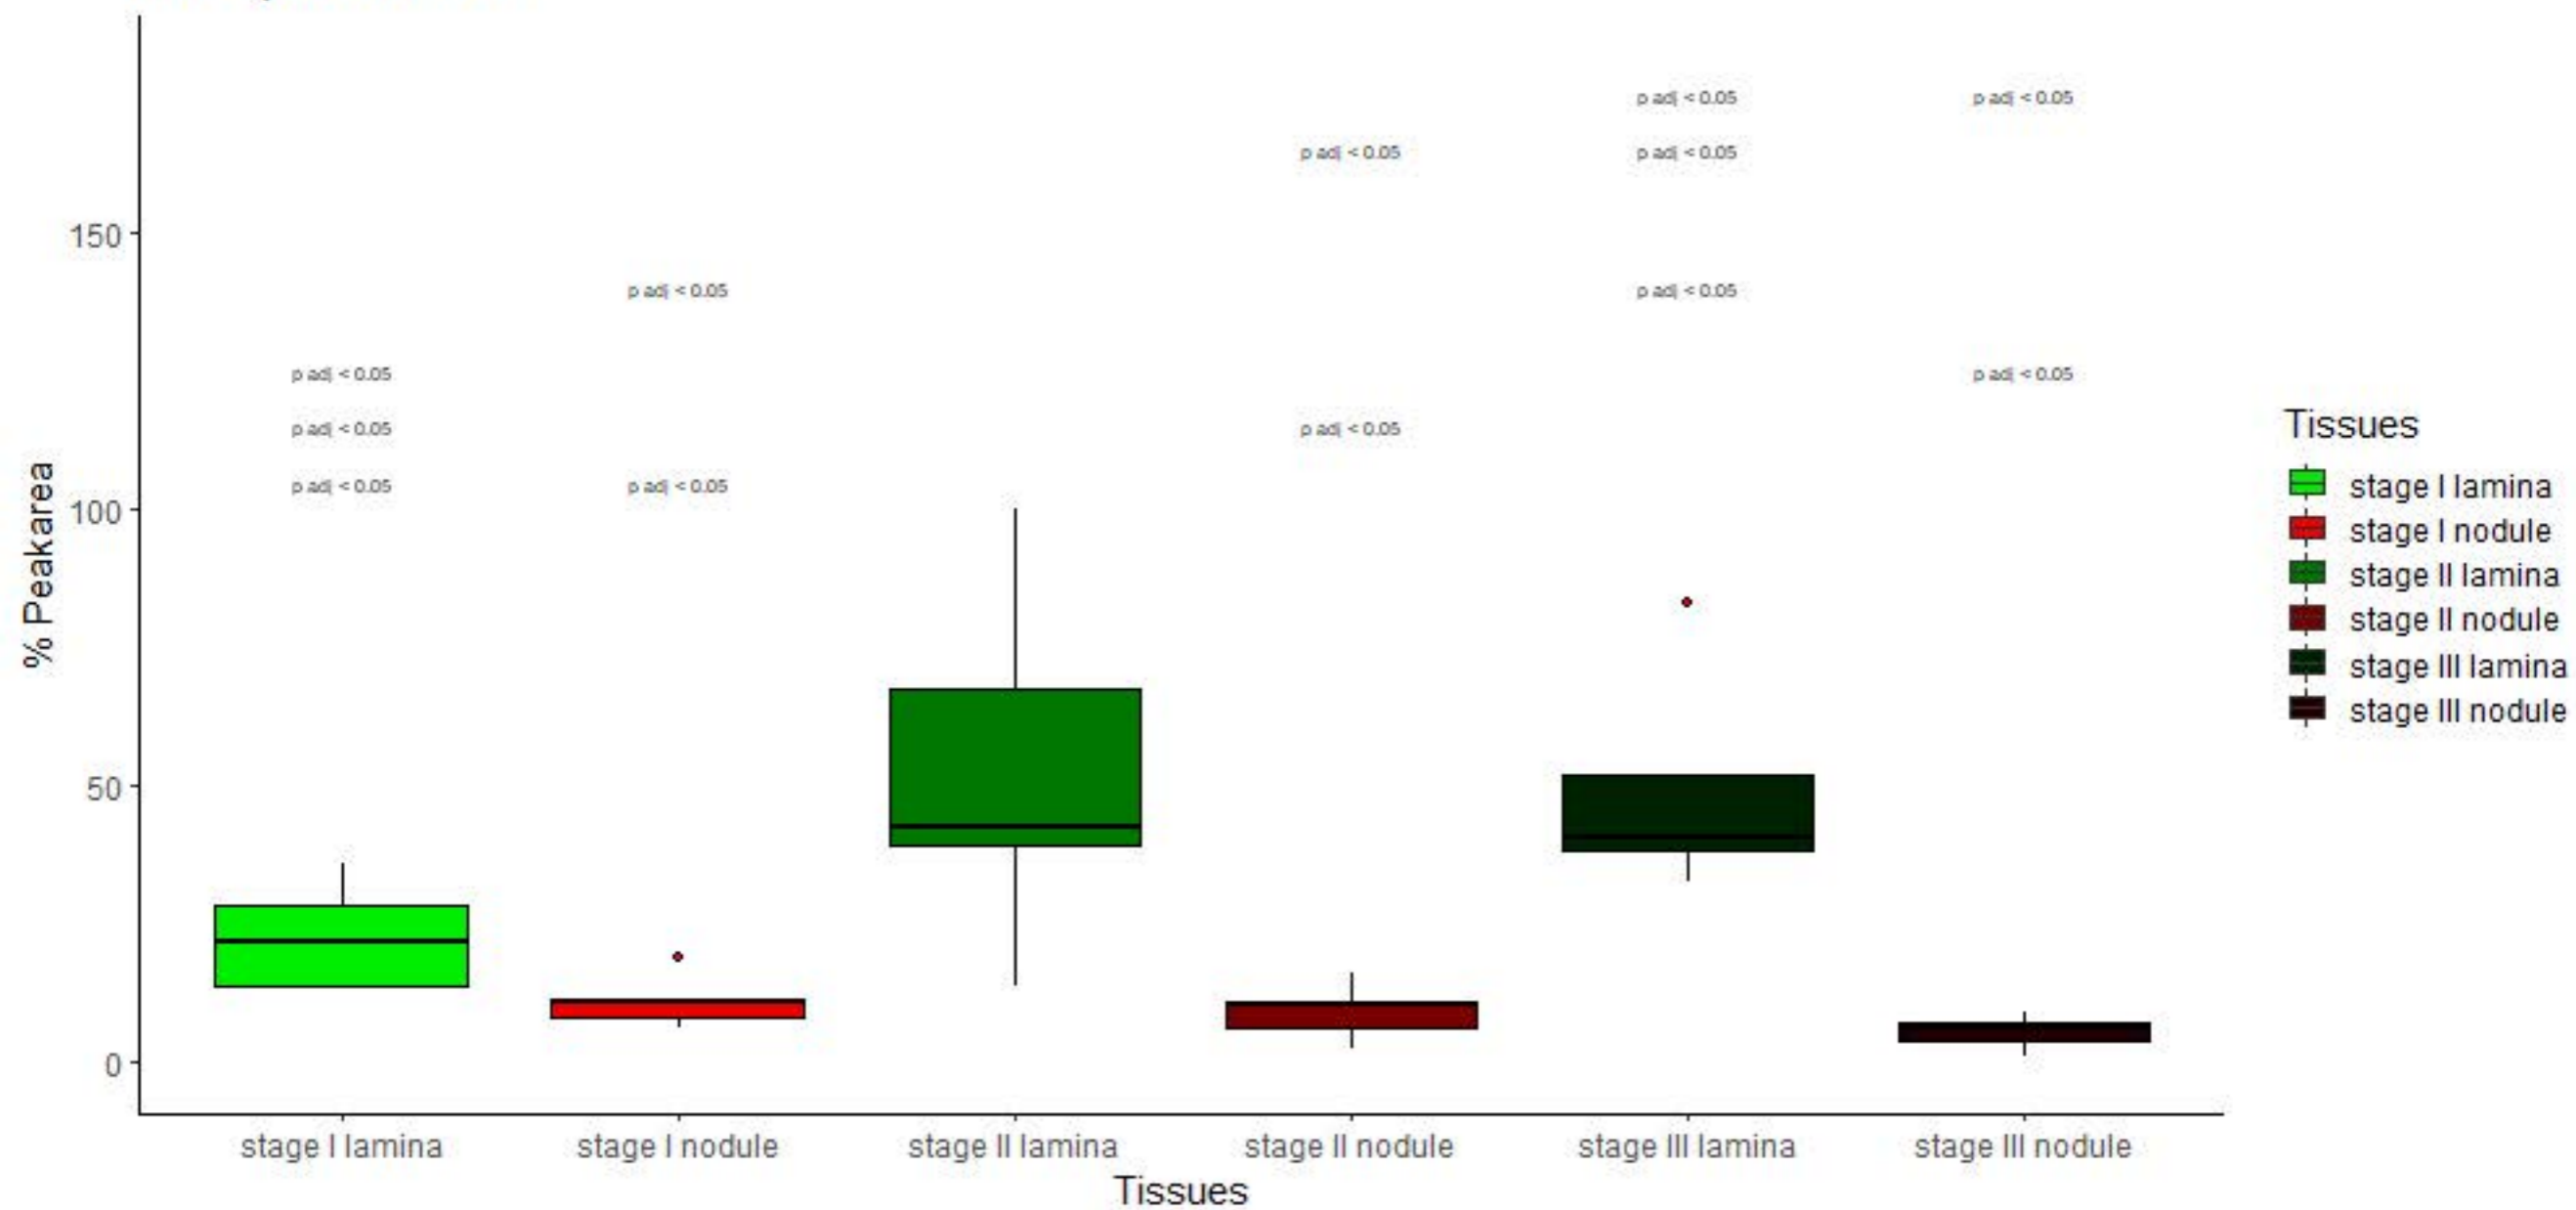

# NA 114 Carbohydrate

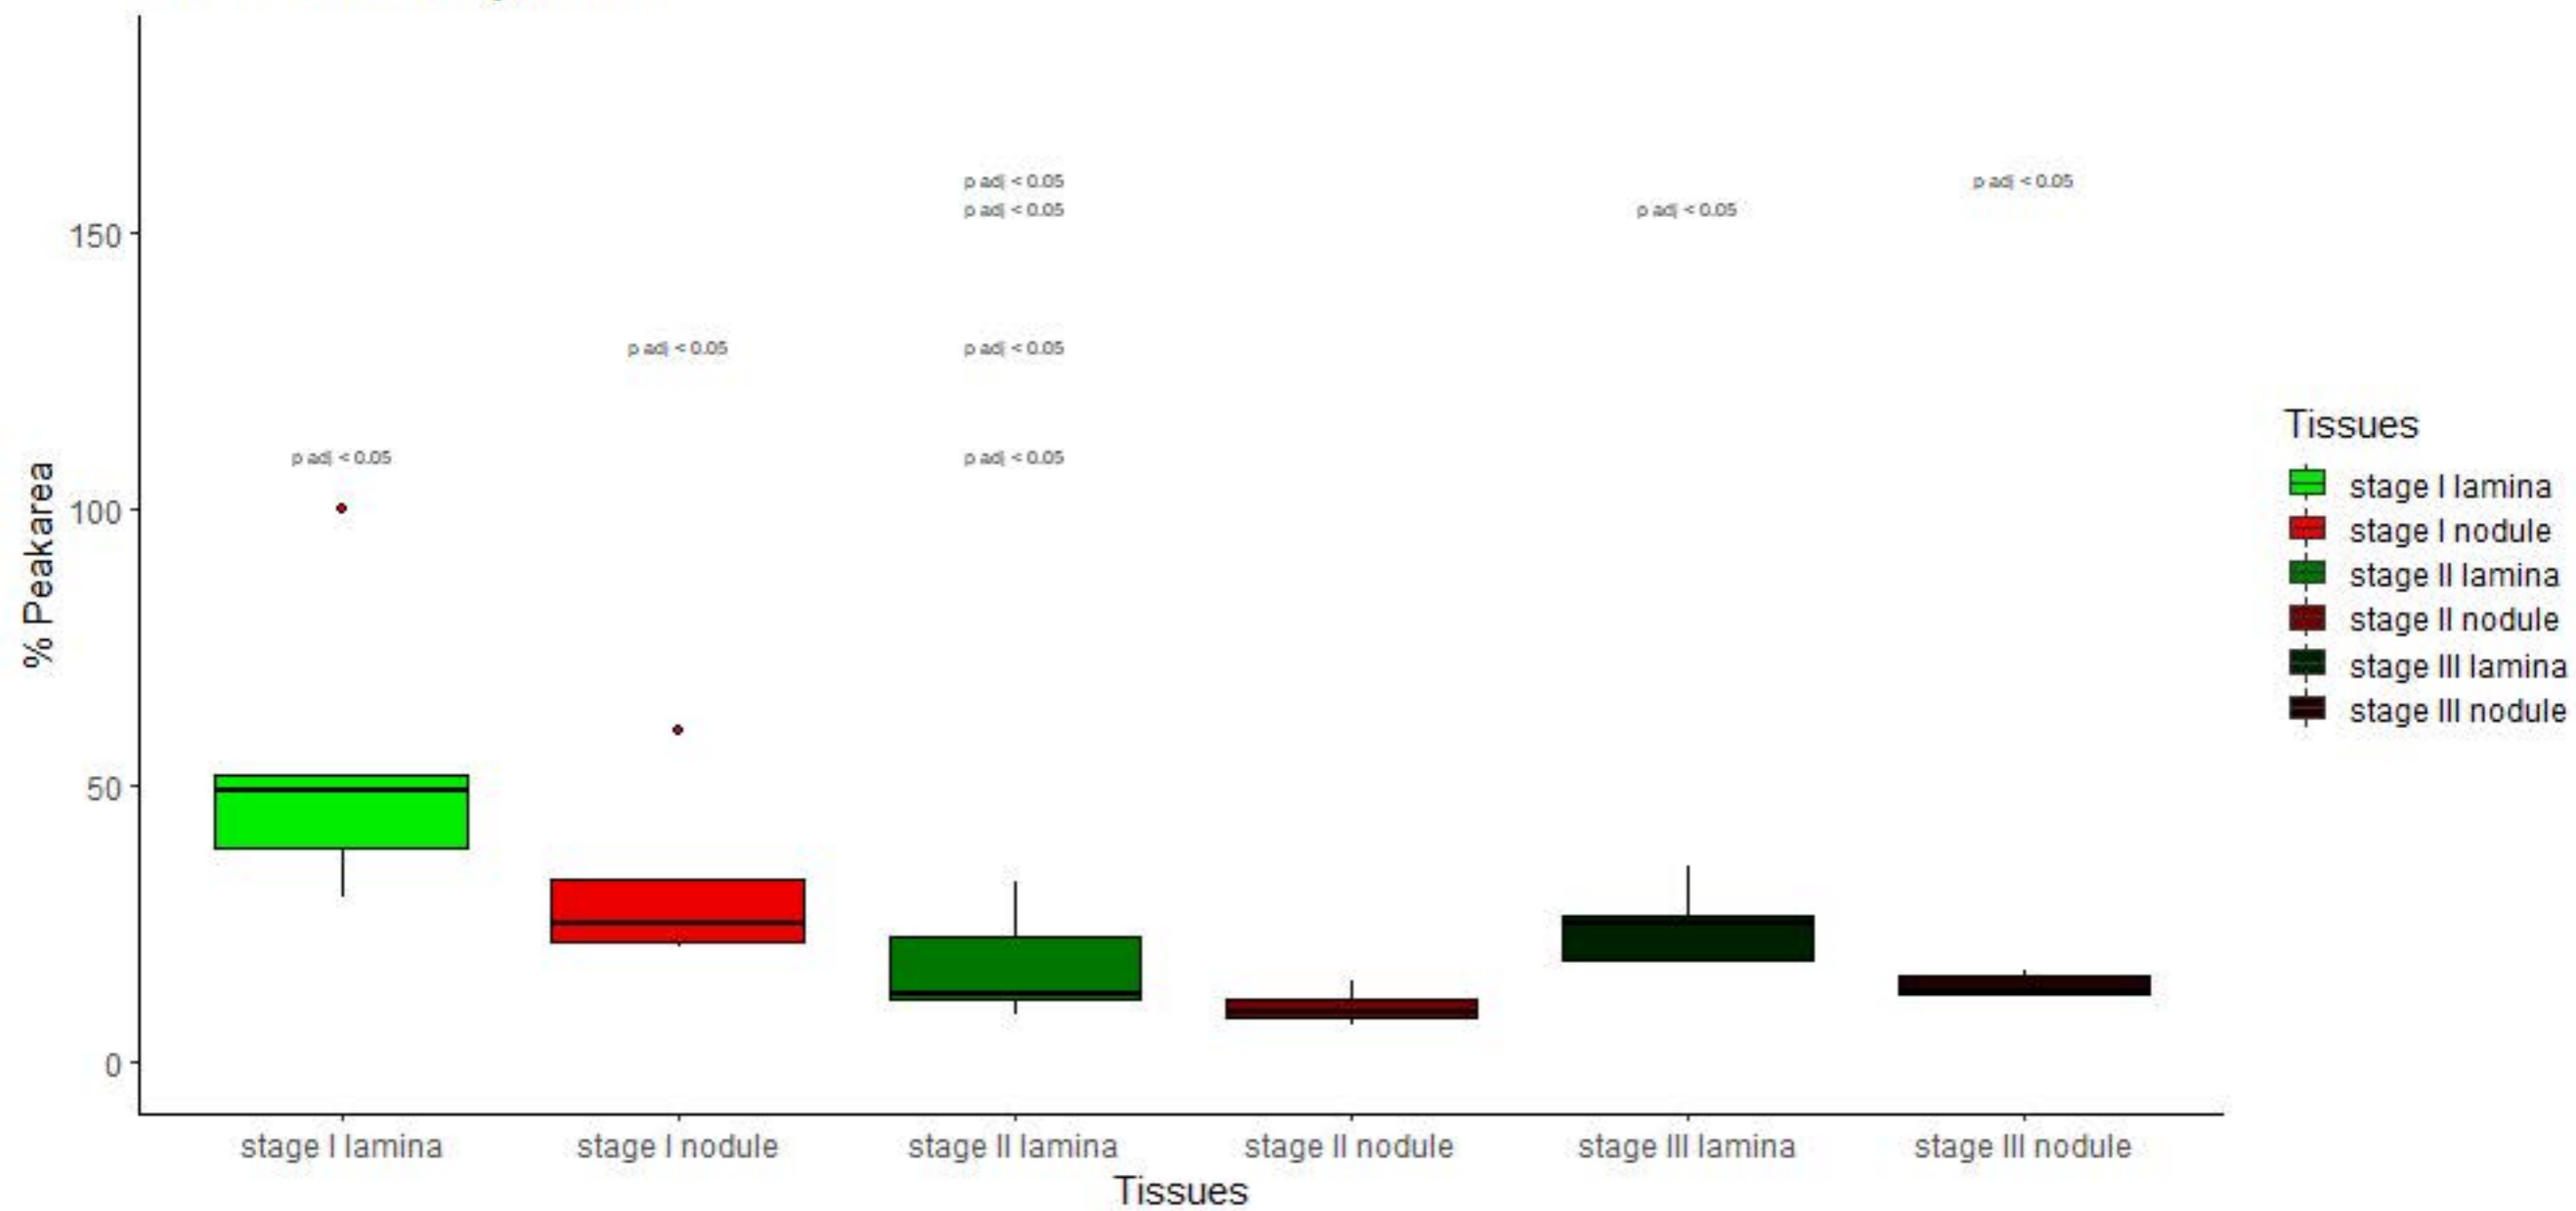

# NA 153 Carbohydrate

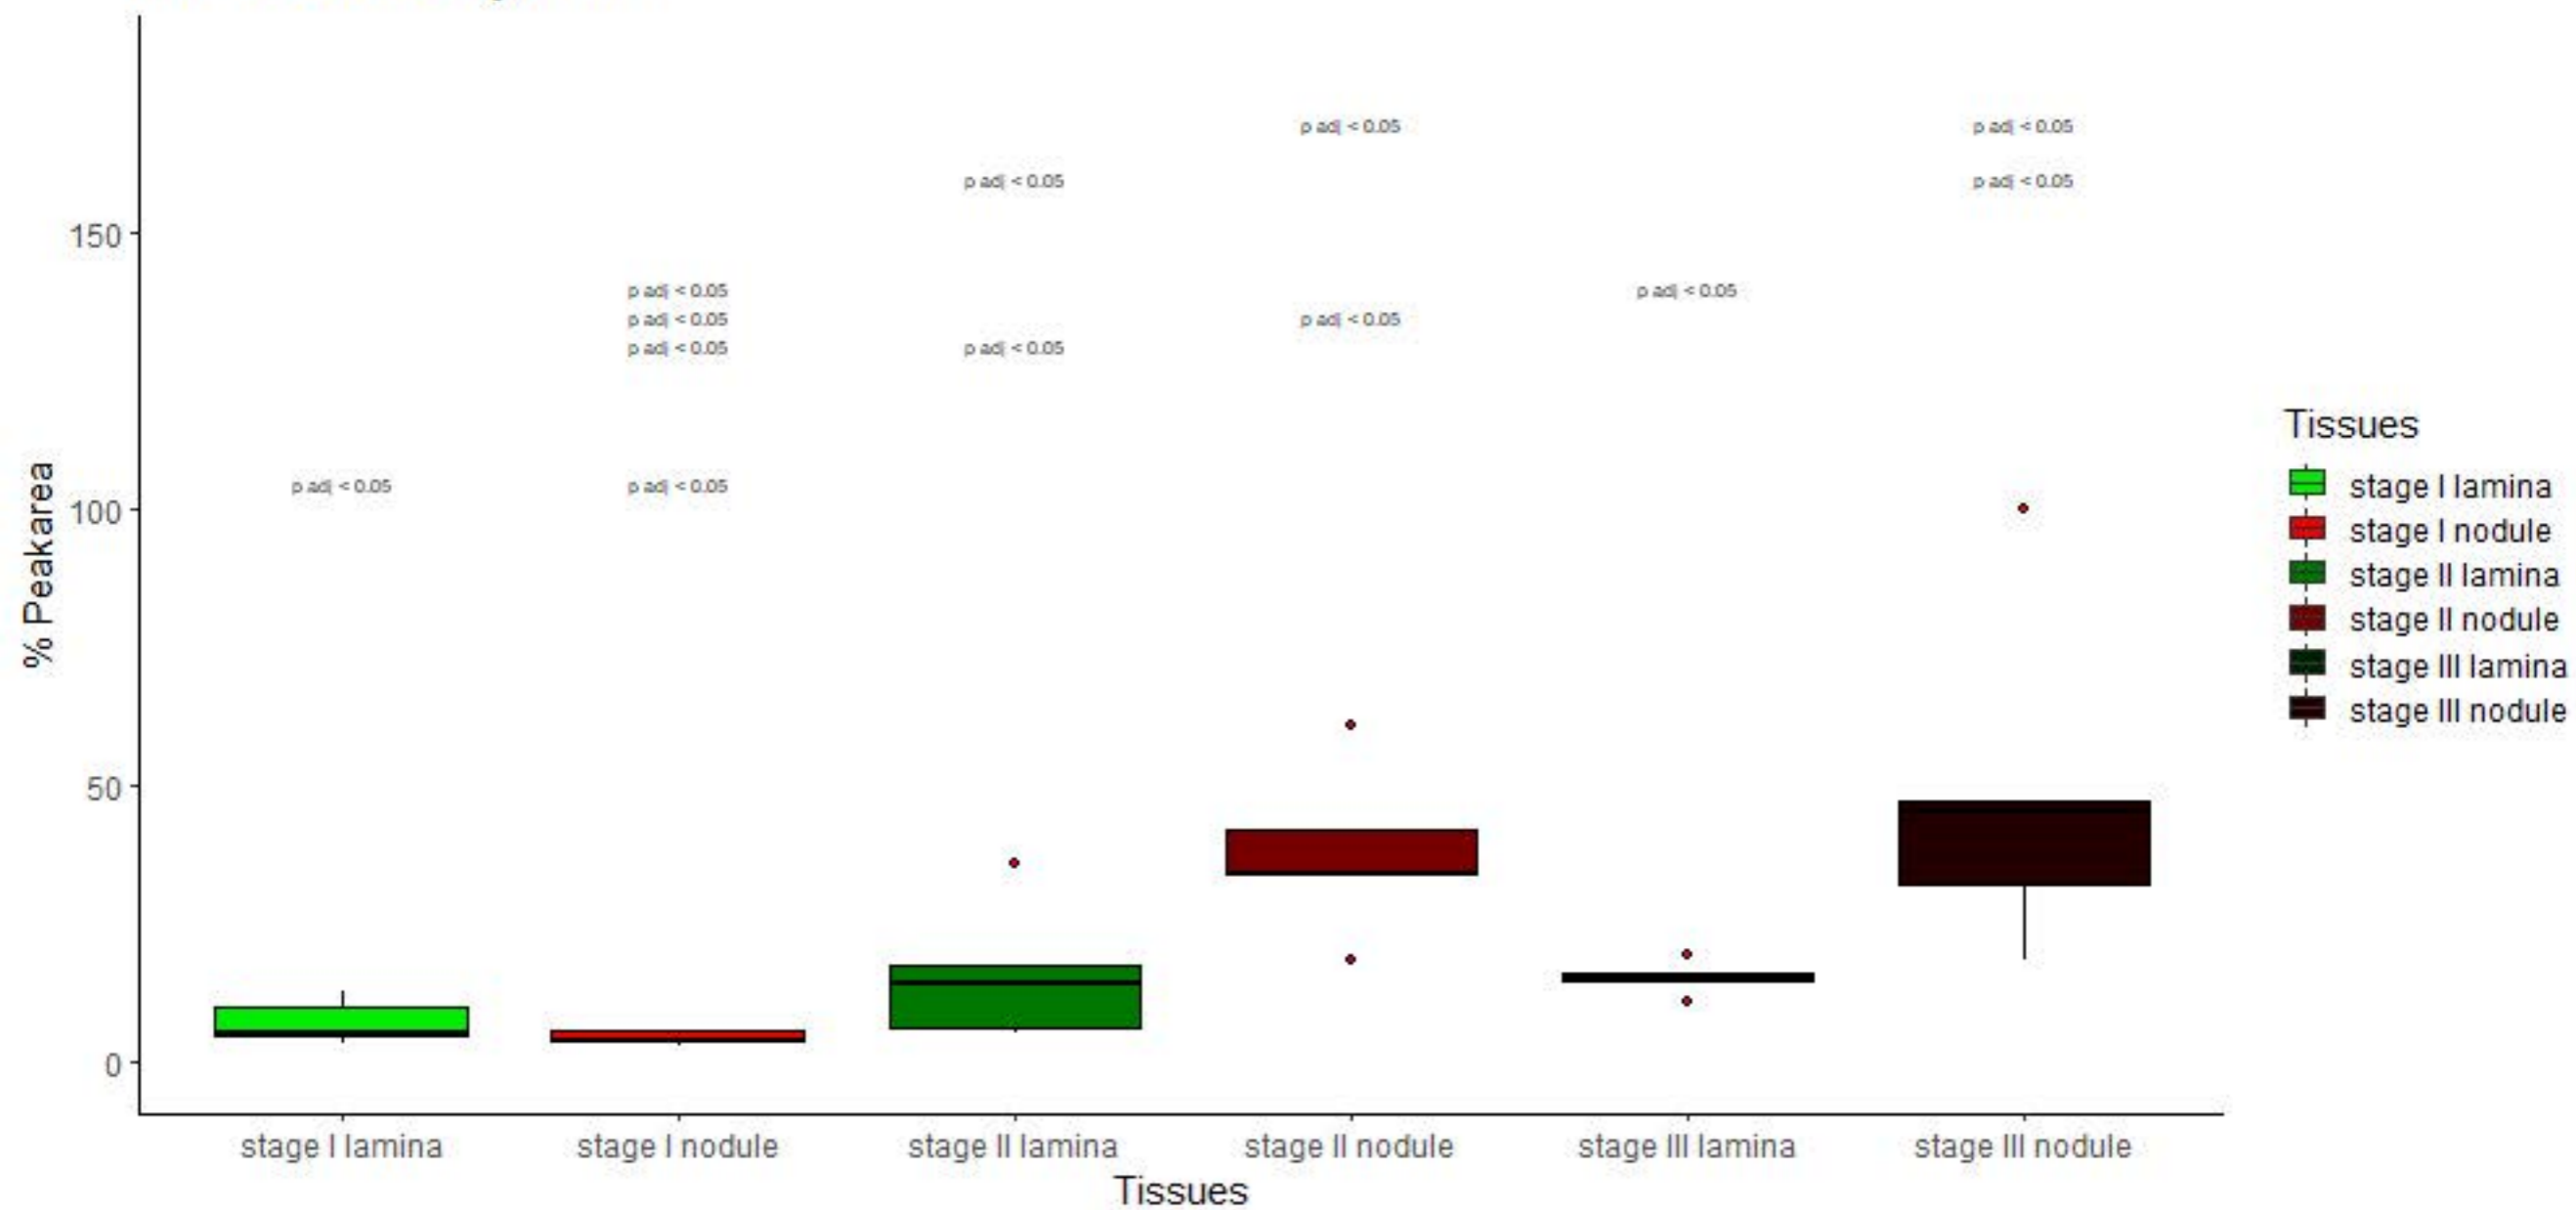



# NA 157 Carbohydrate

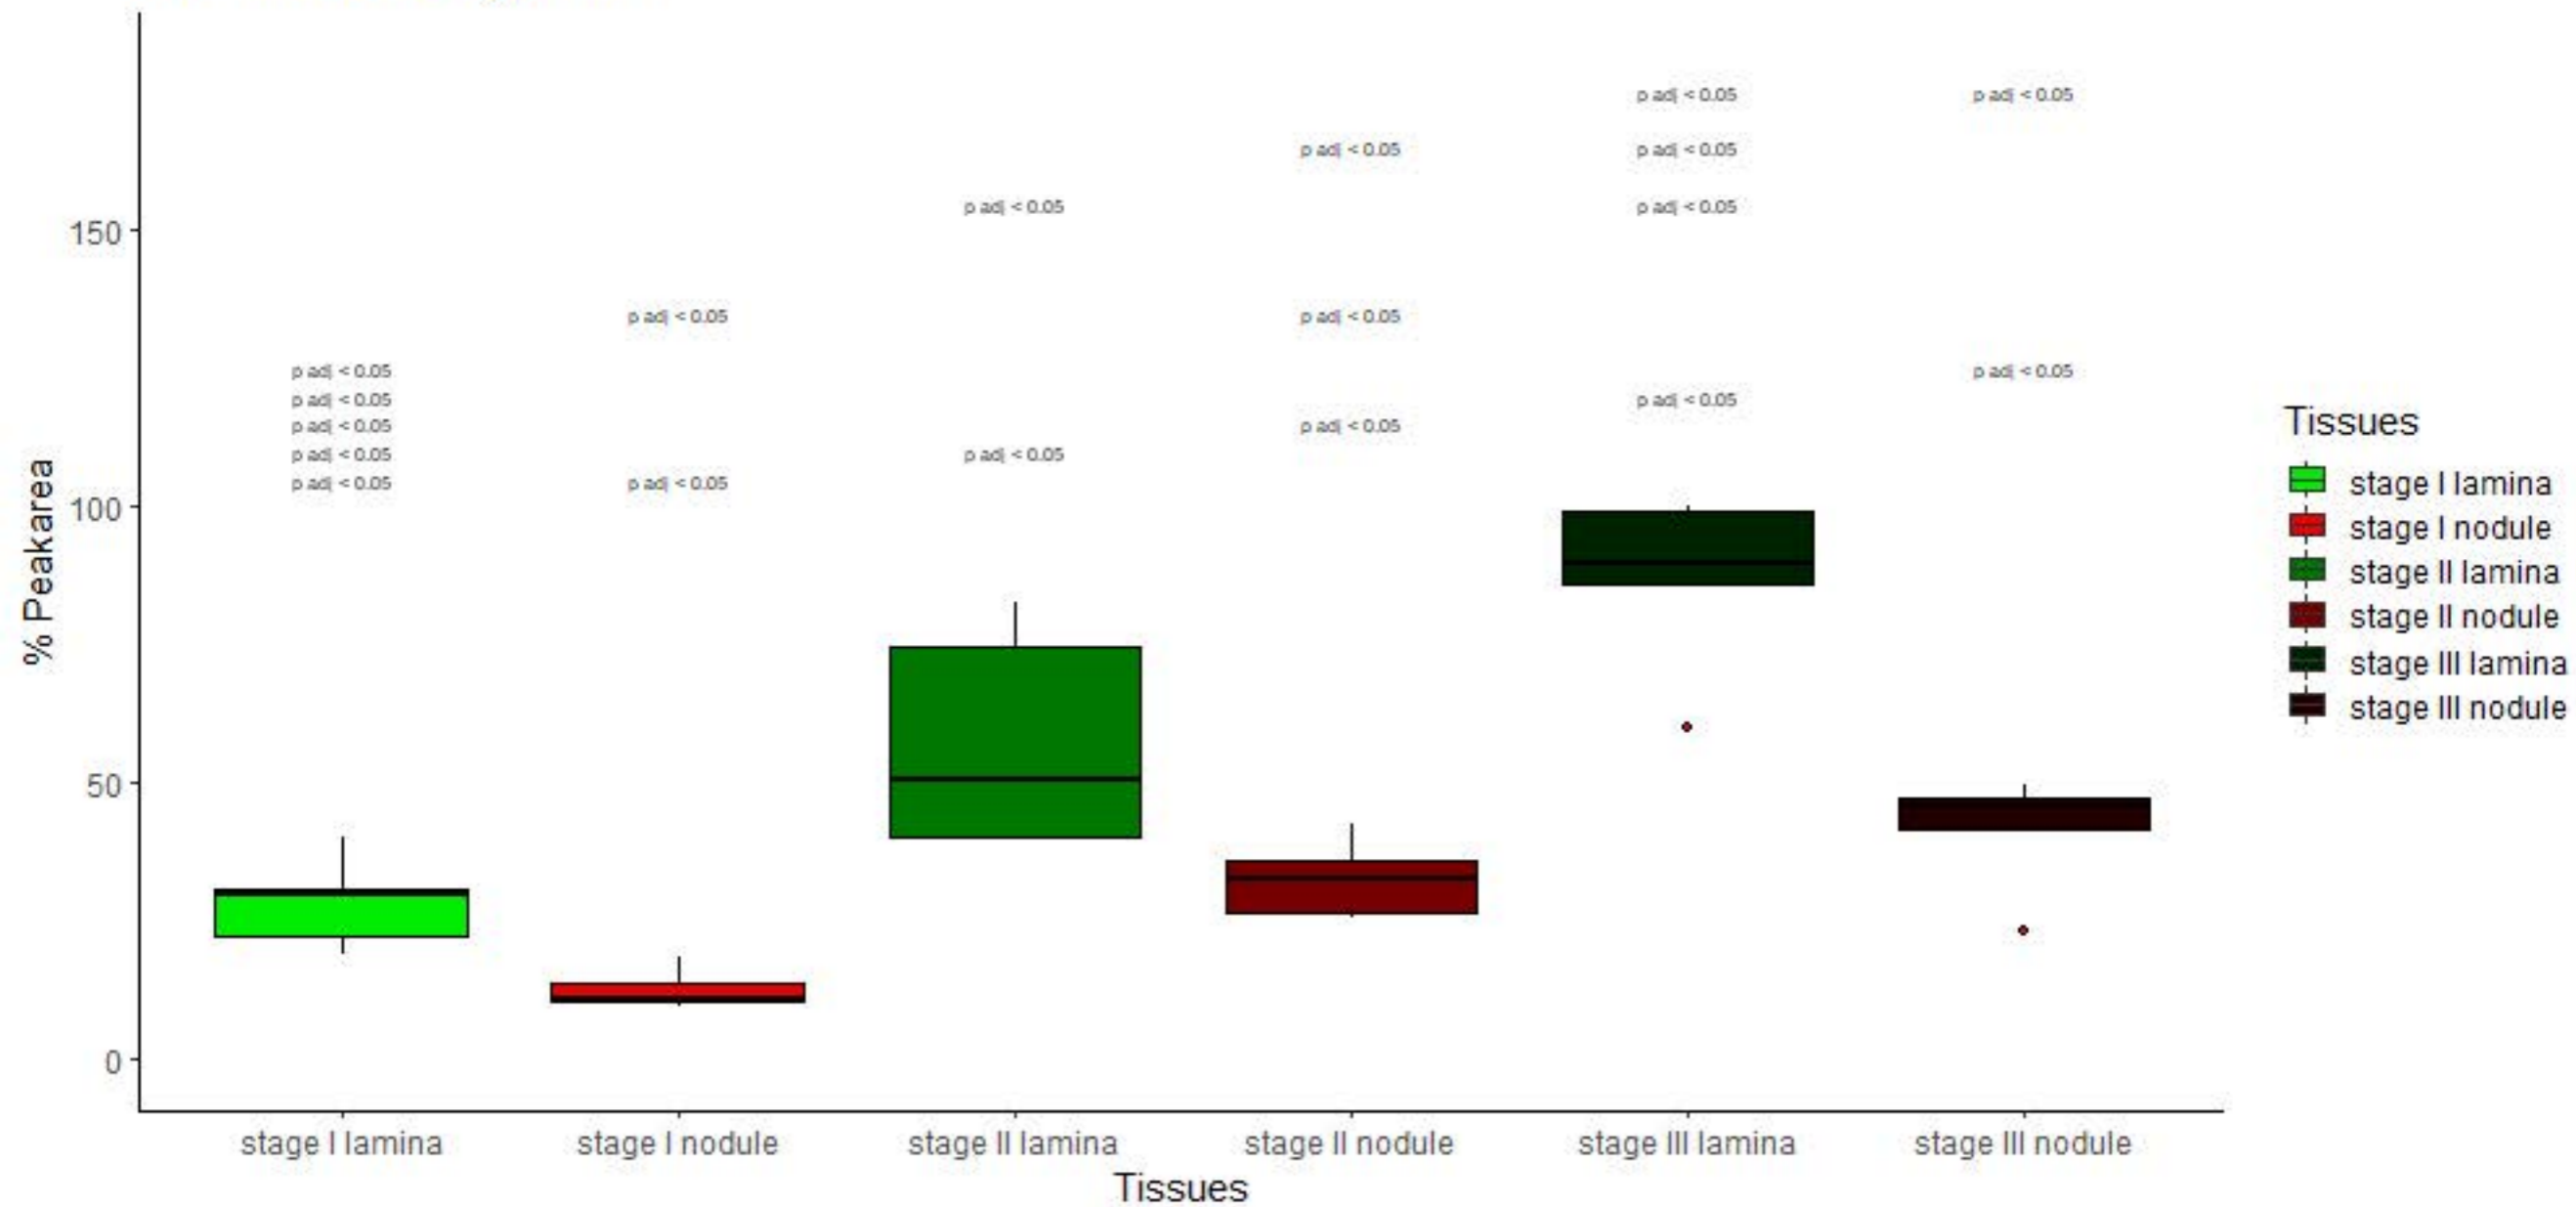

# NA 159 Carbohydrate

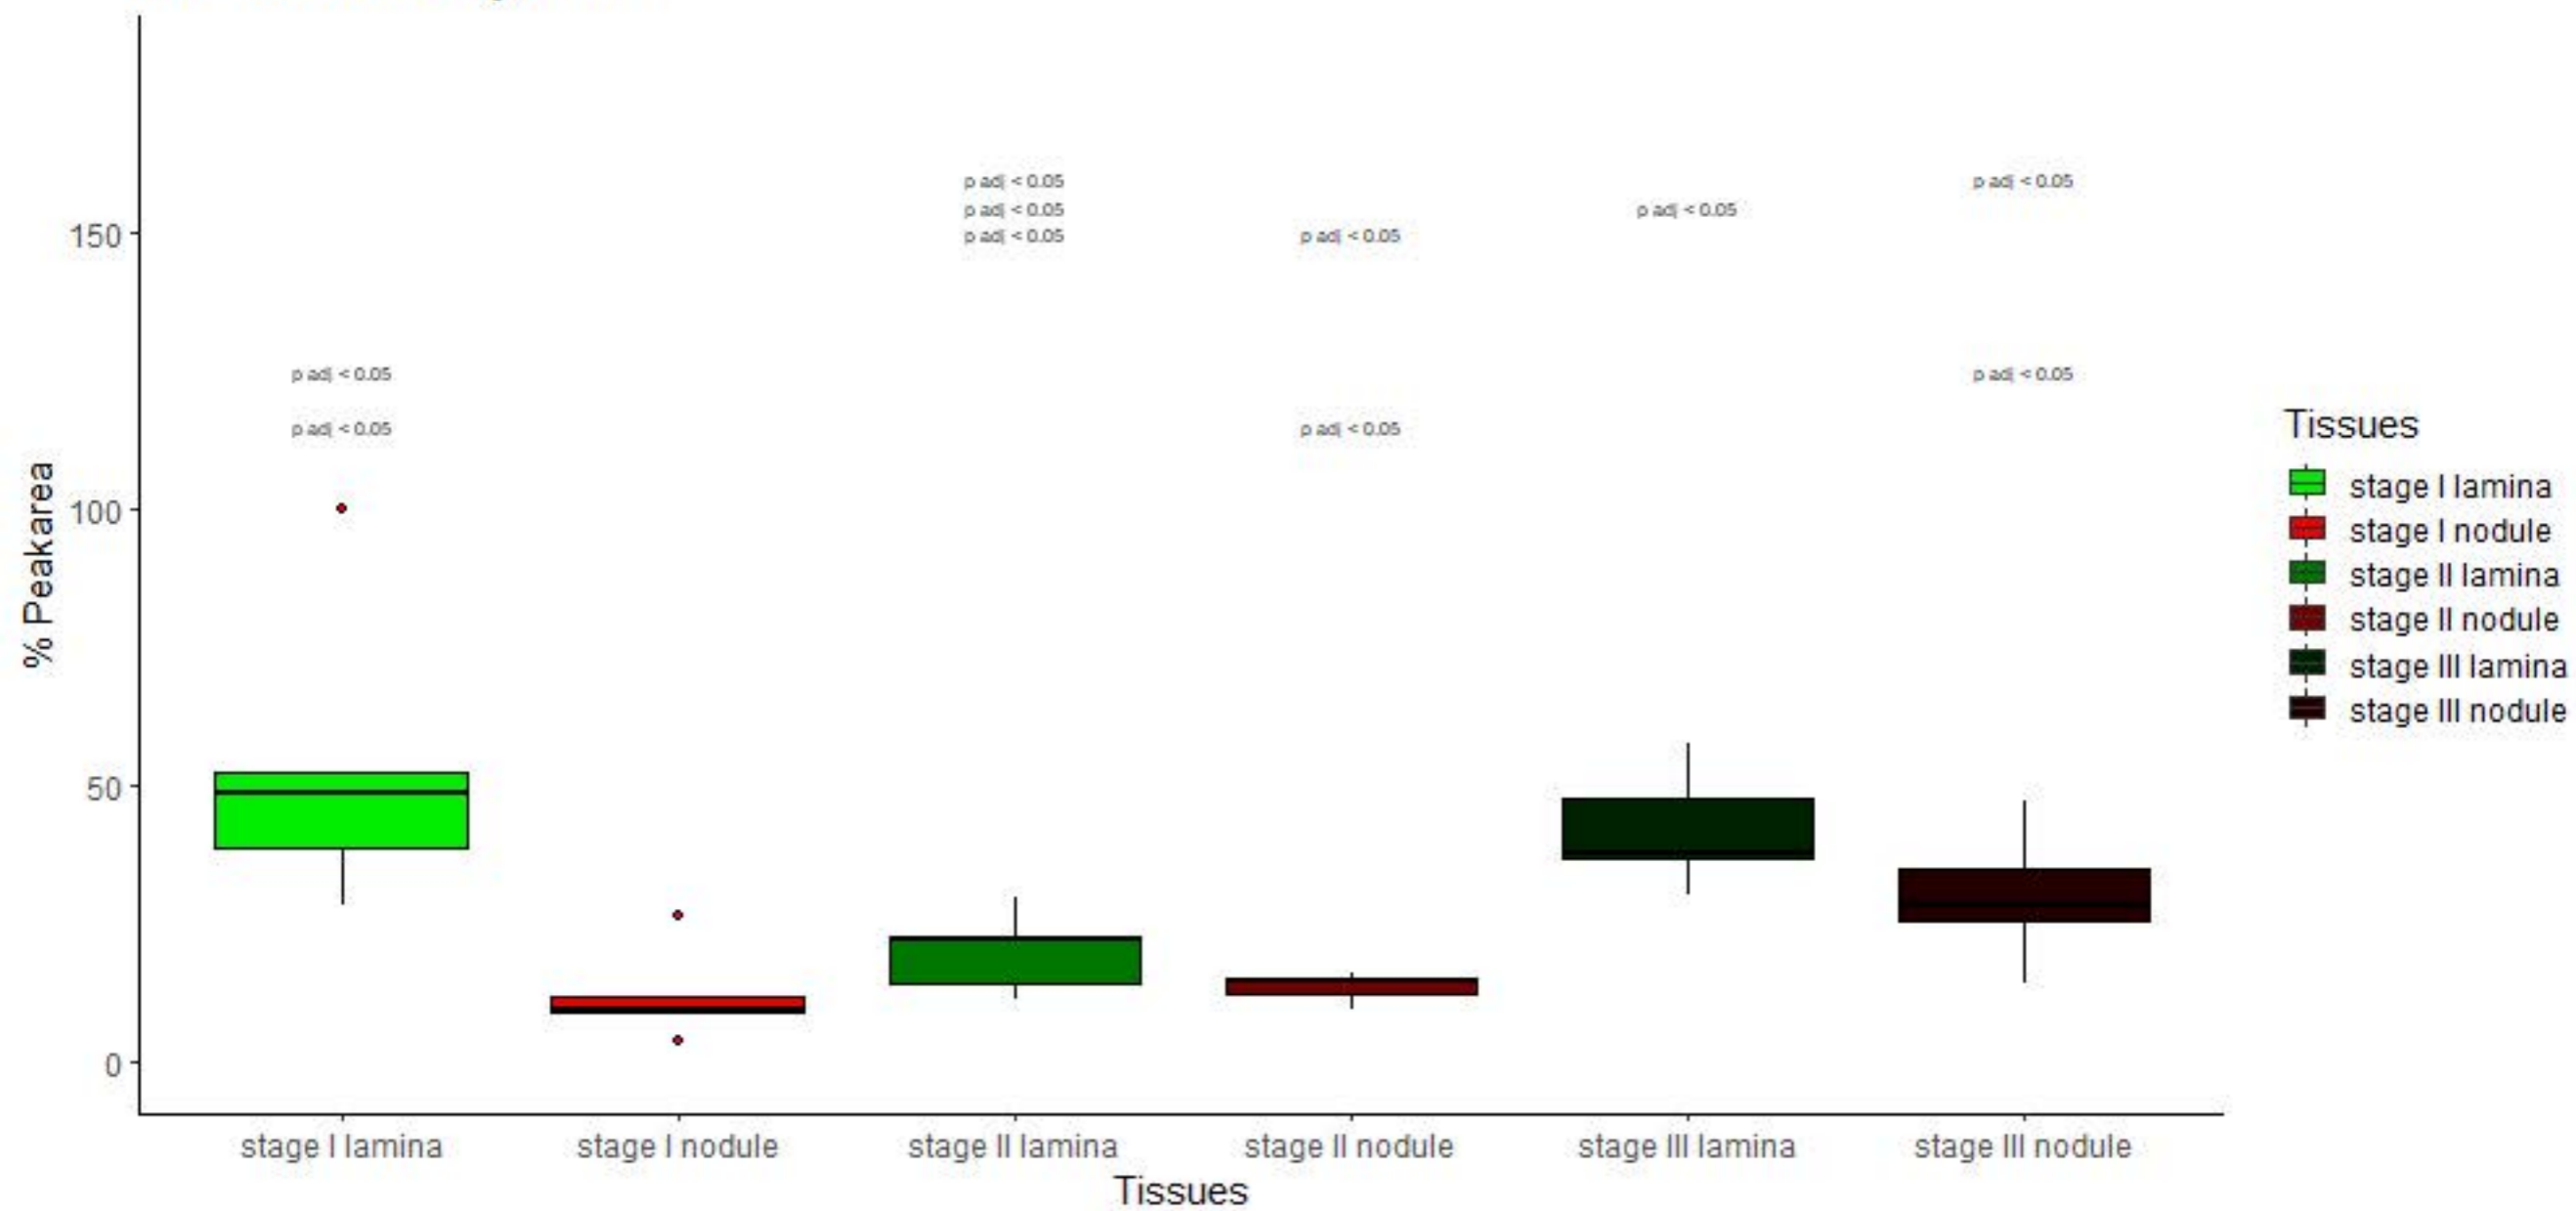



# NA 160 Carbohydrate

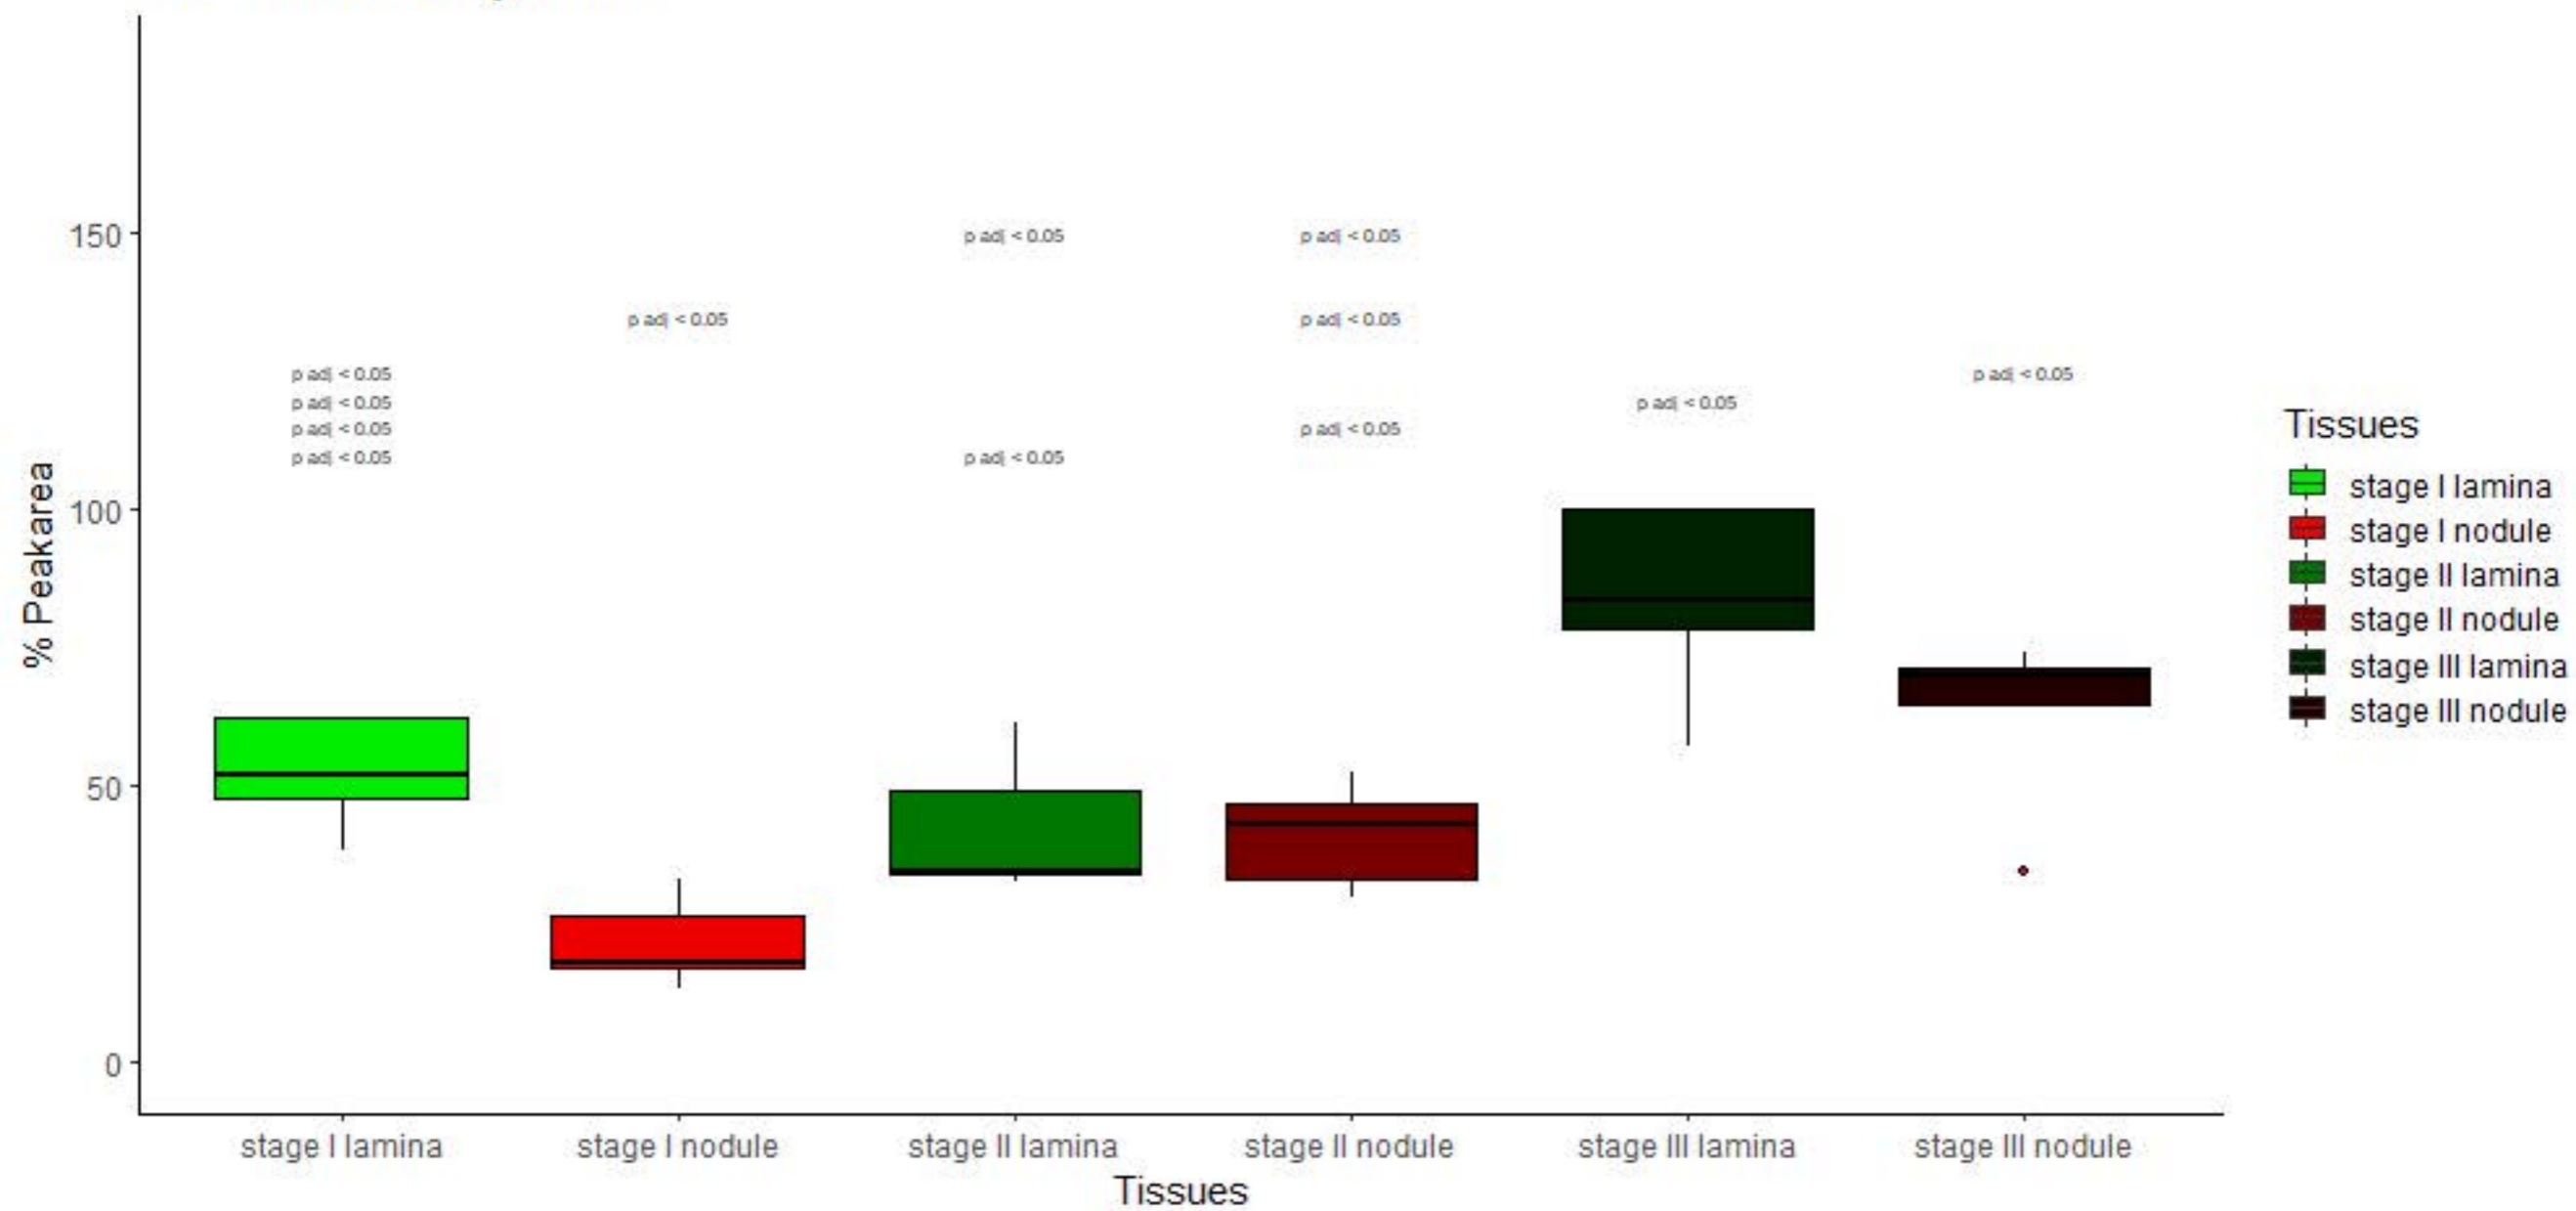

# NA 161 Carbohydrate

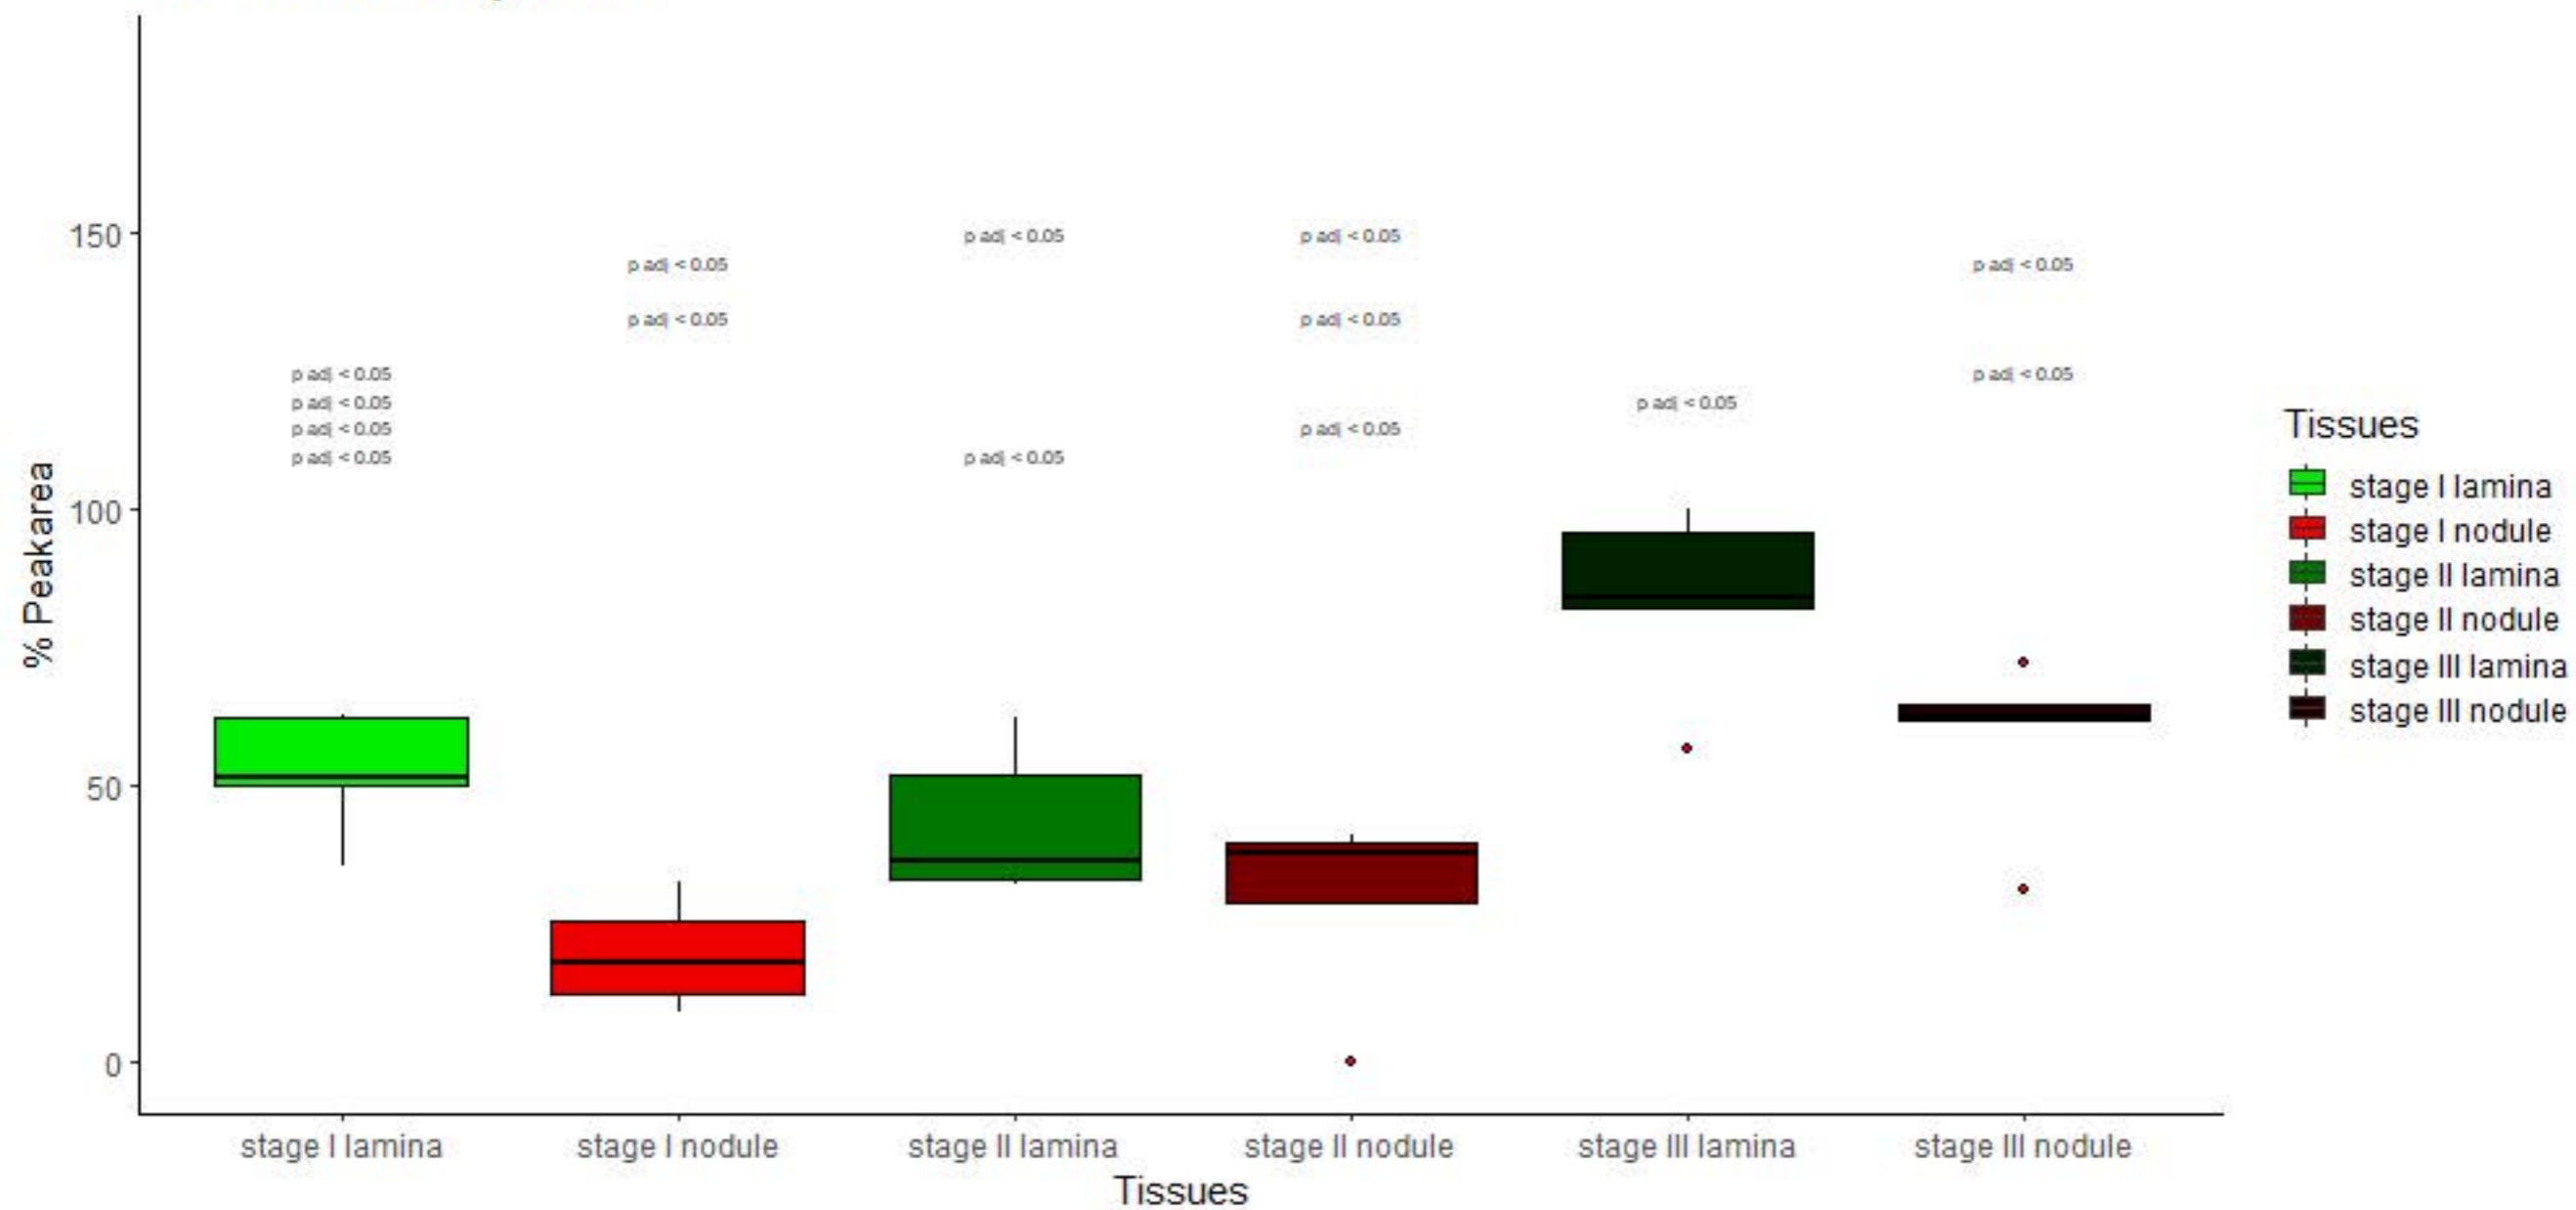

# NA 17Carbohydrate

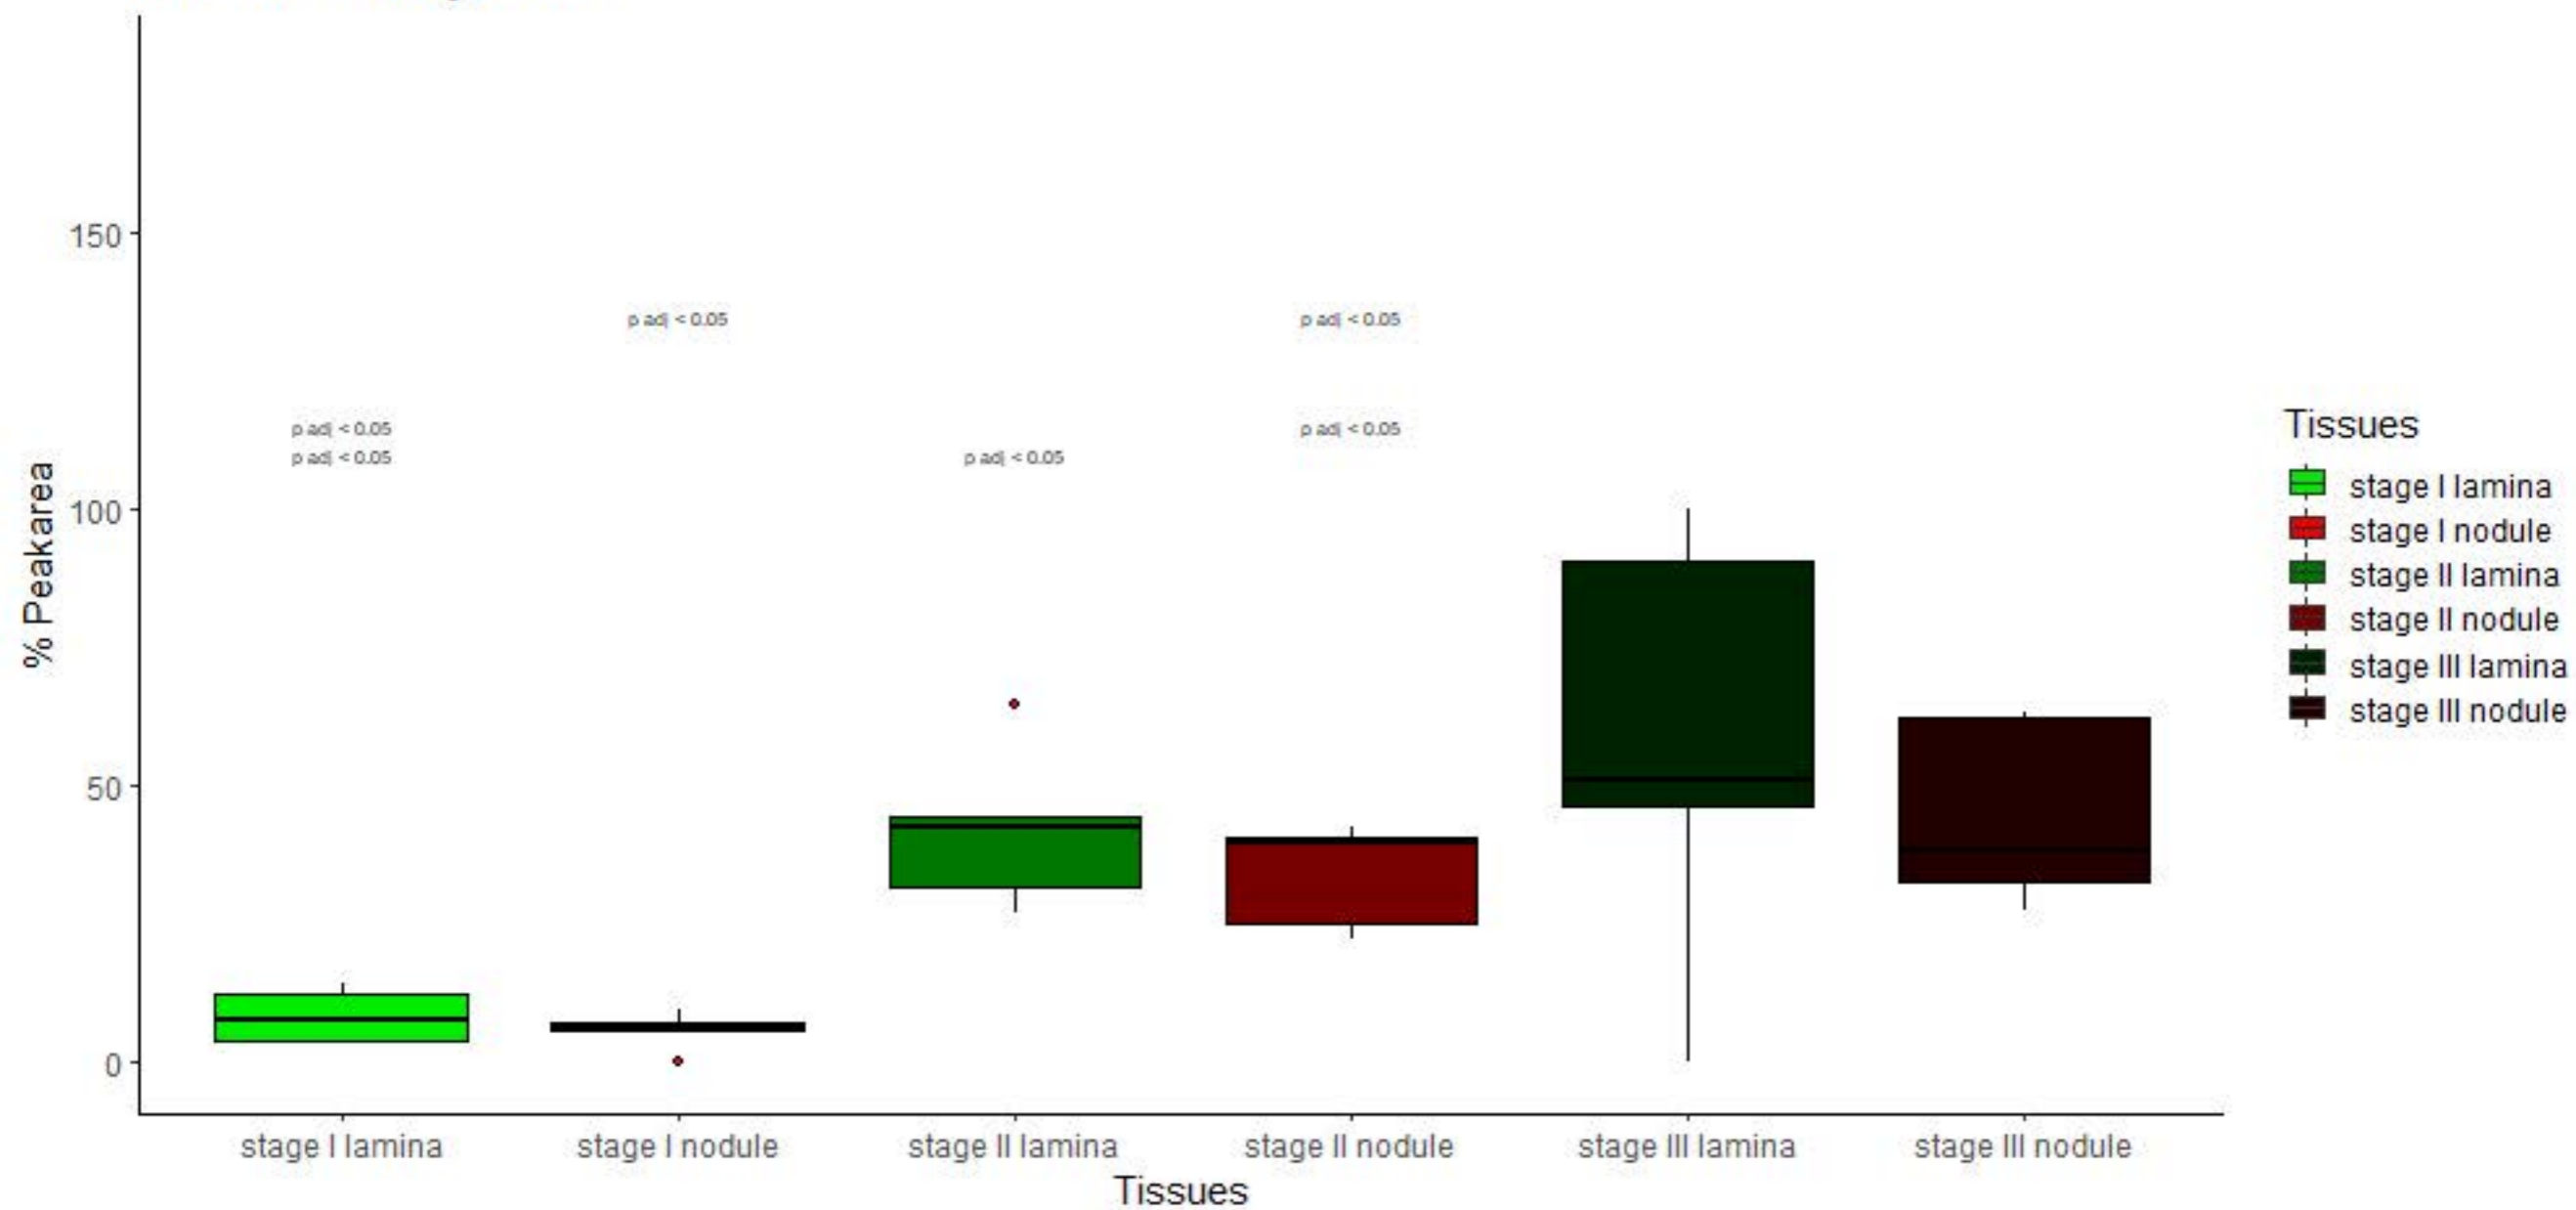

# NA Carbohydrate 1

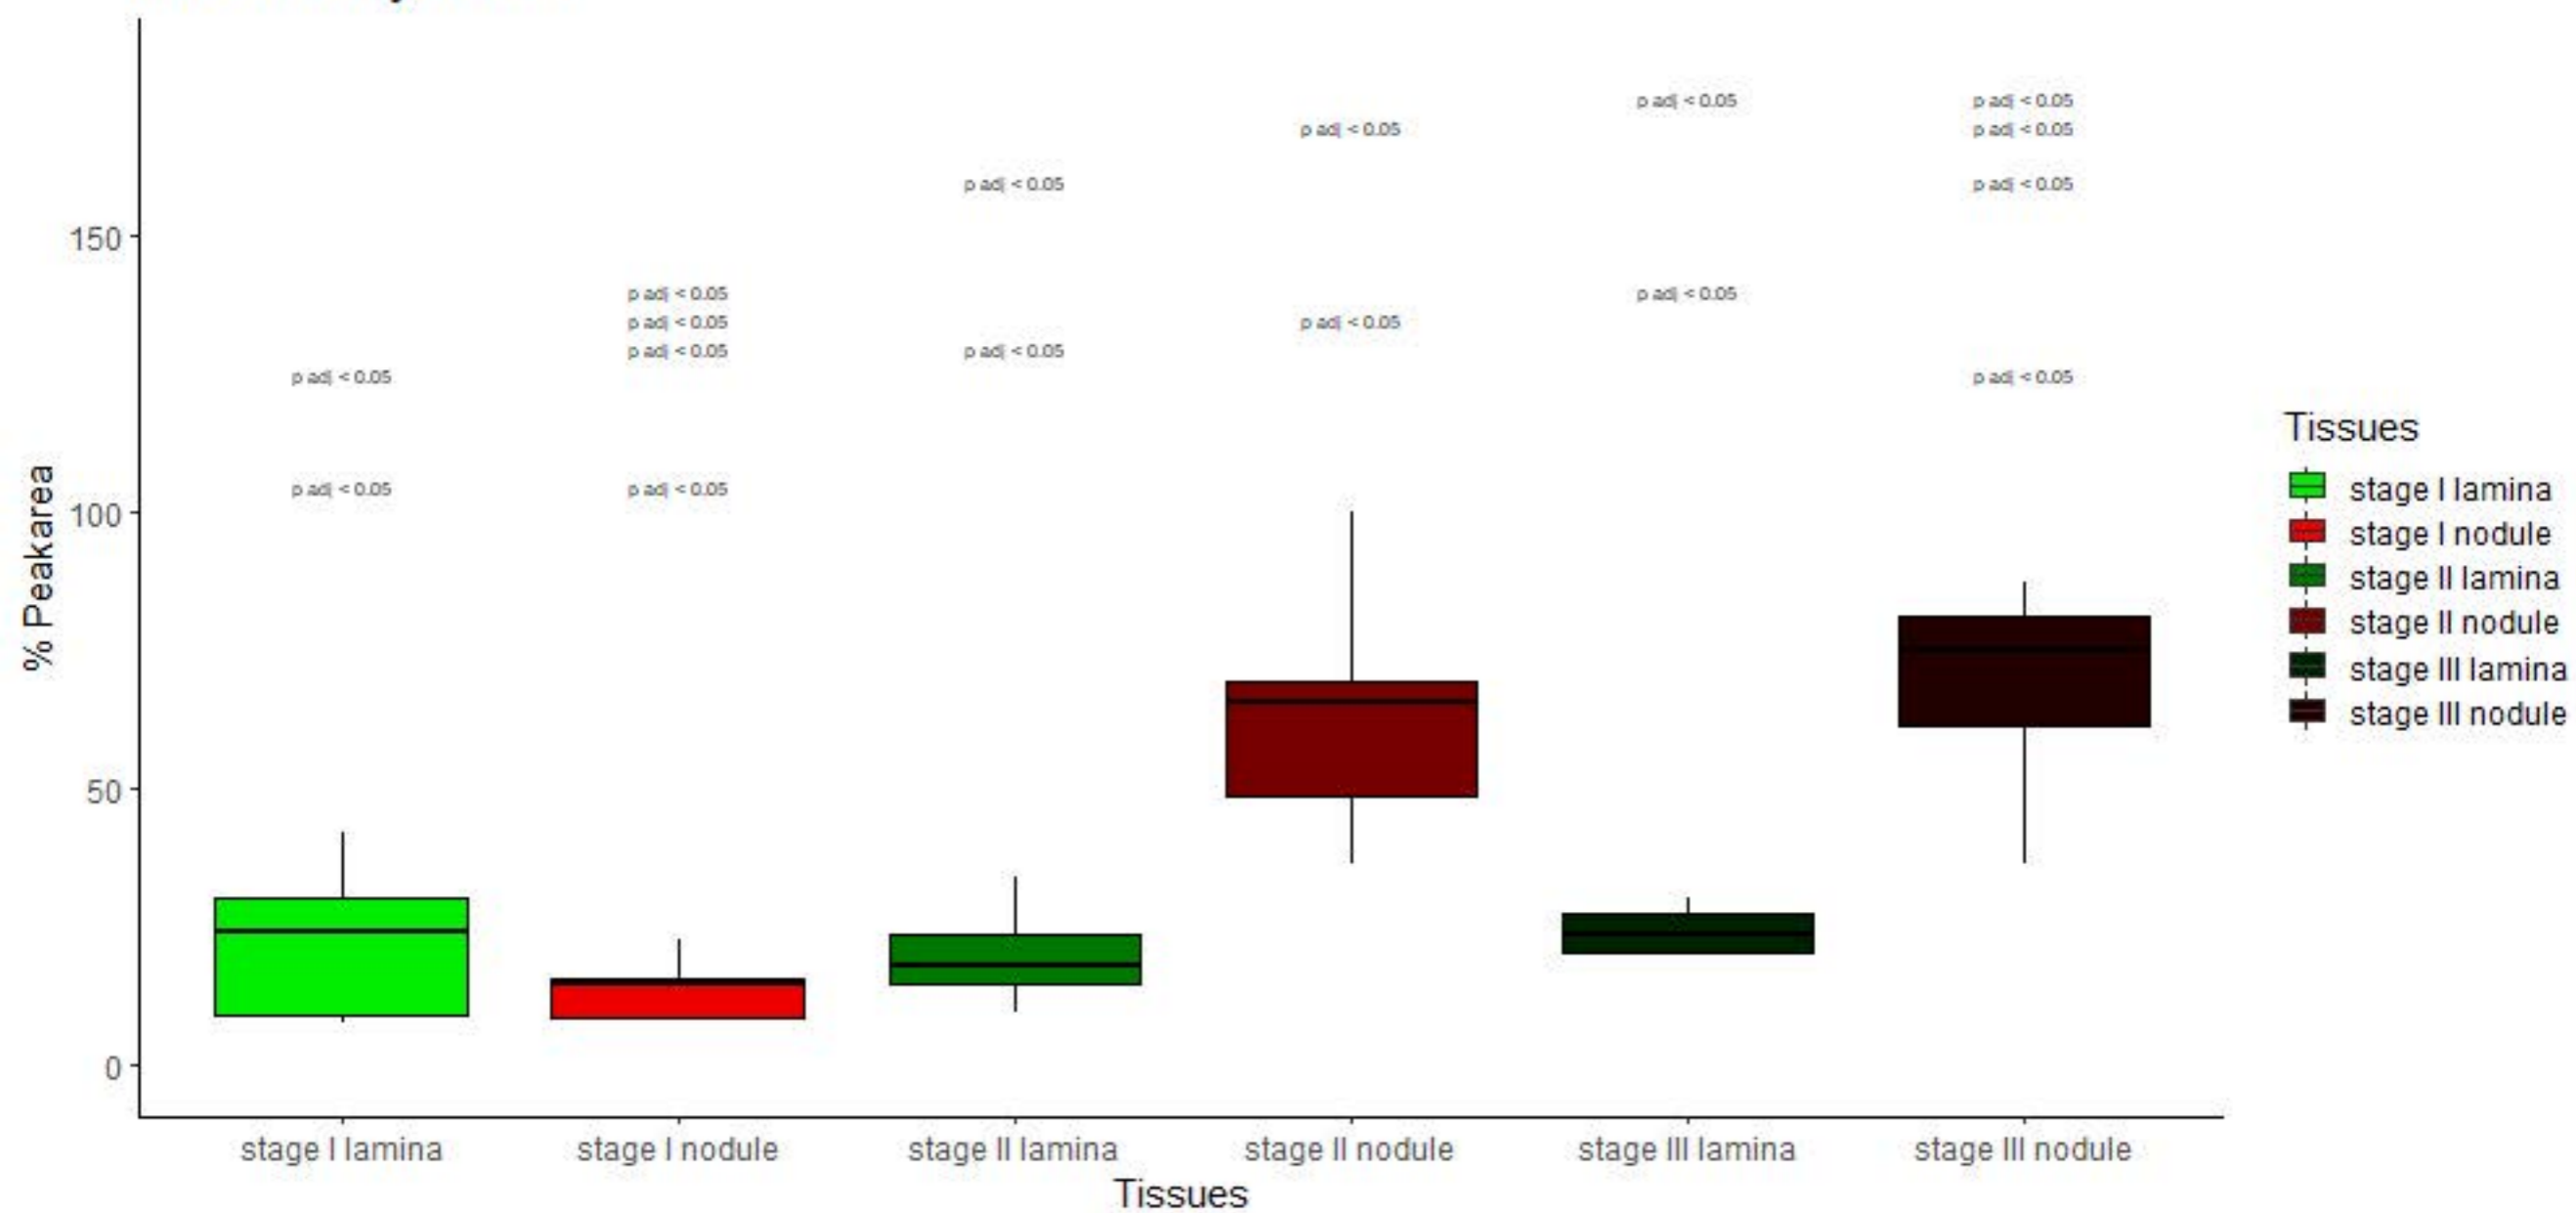

# NA Carbohydrate 135

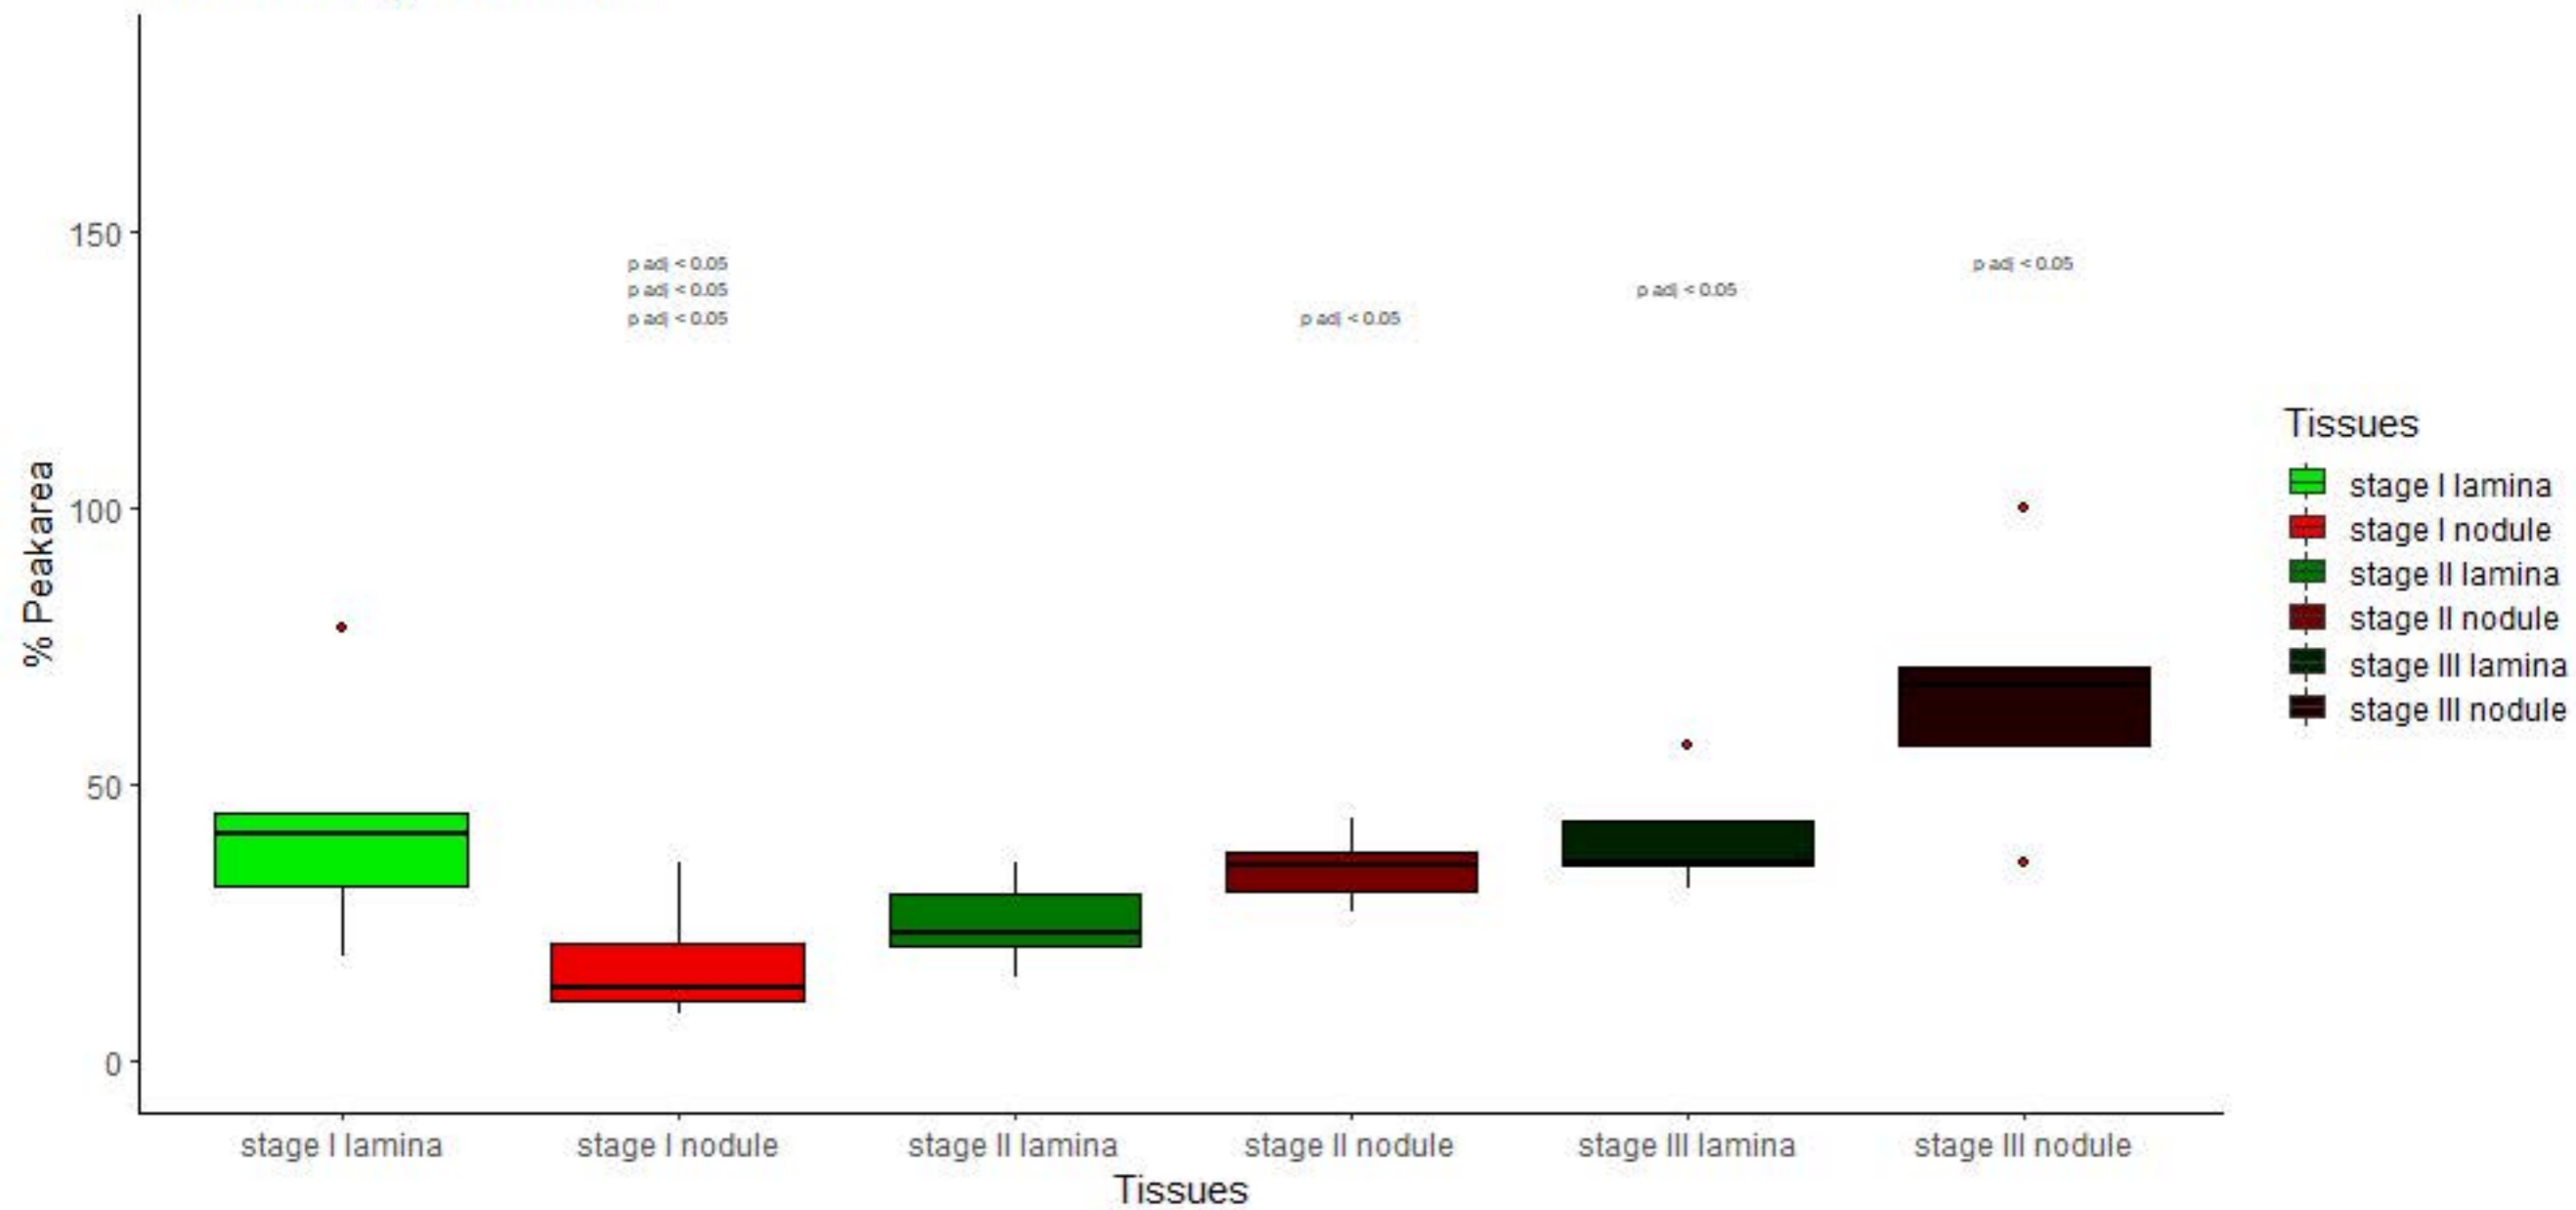

# NA Carbohydrate 136

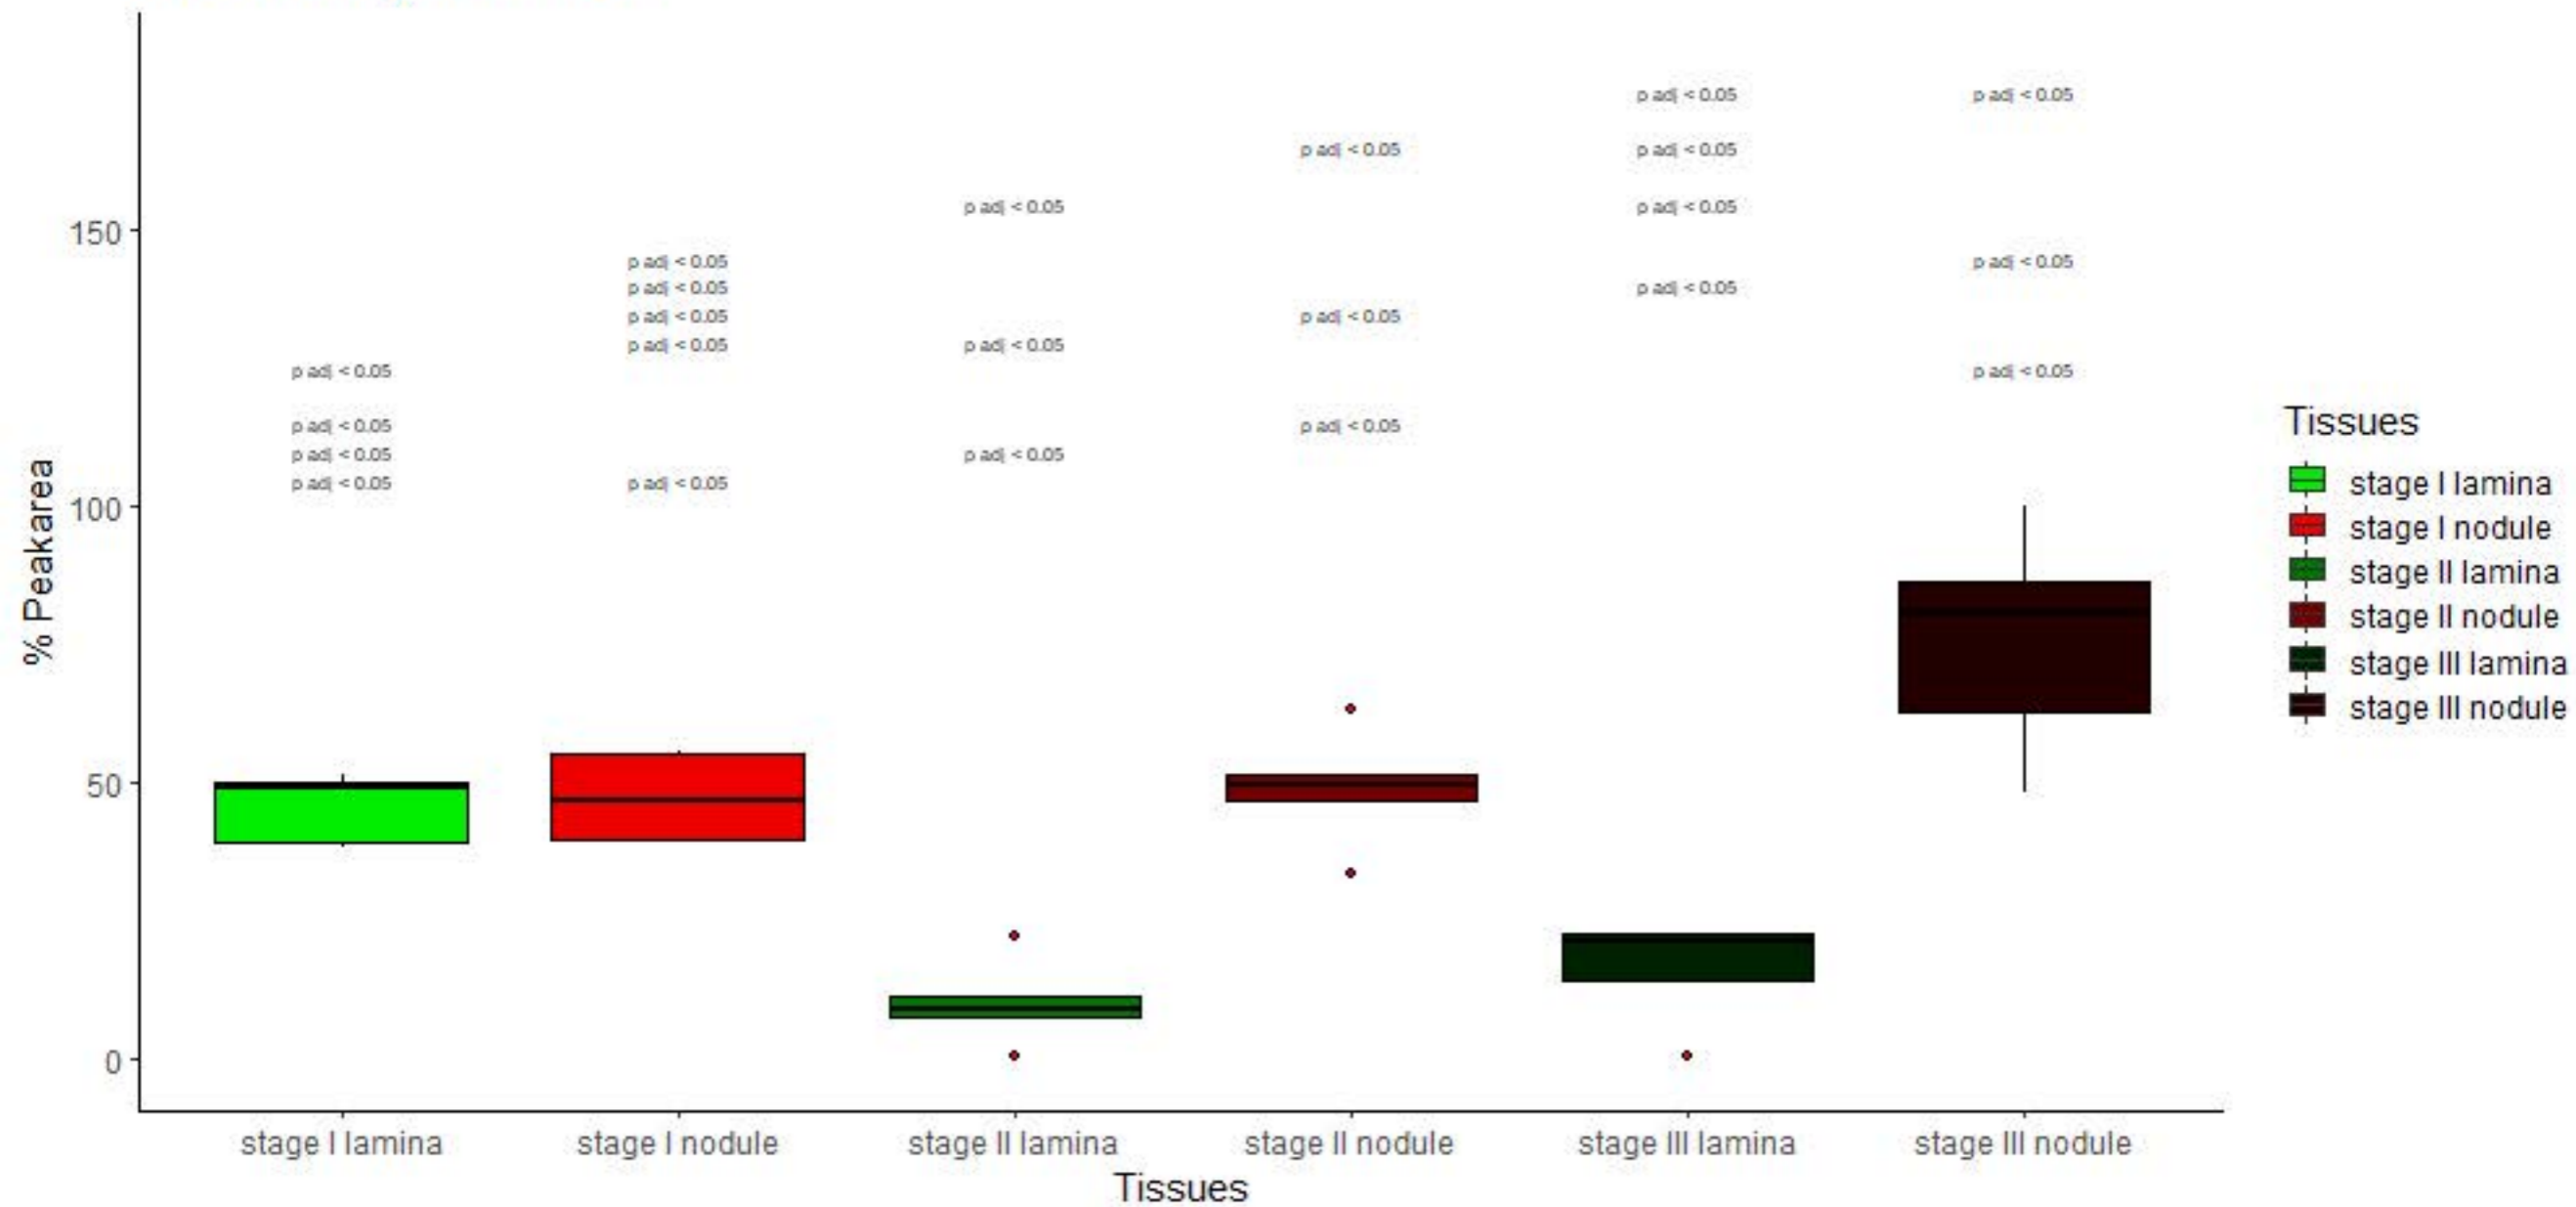

# NA 158 Carbohydrate

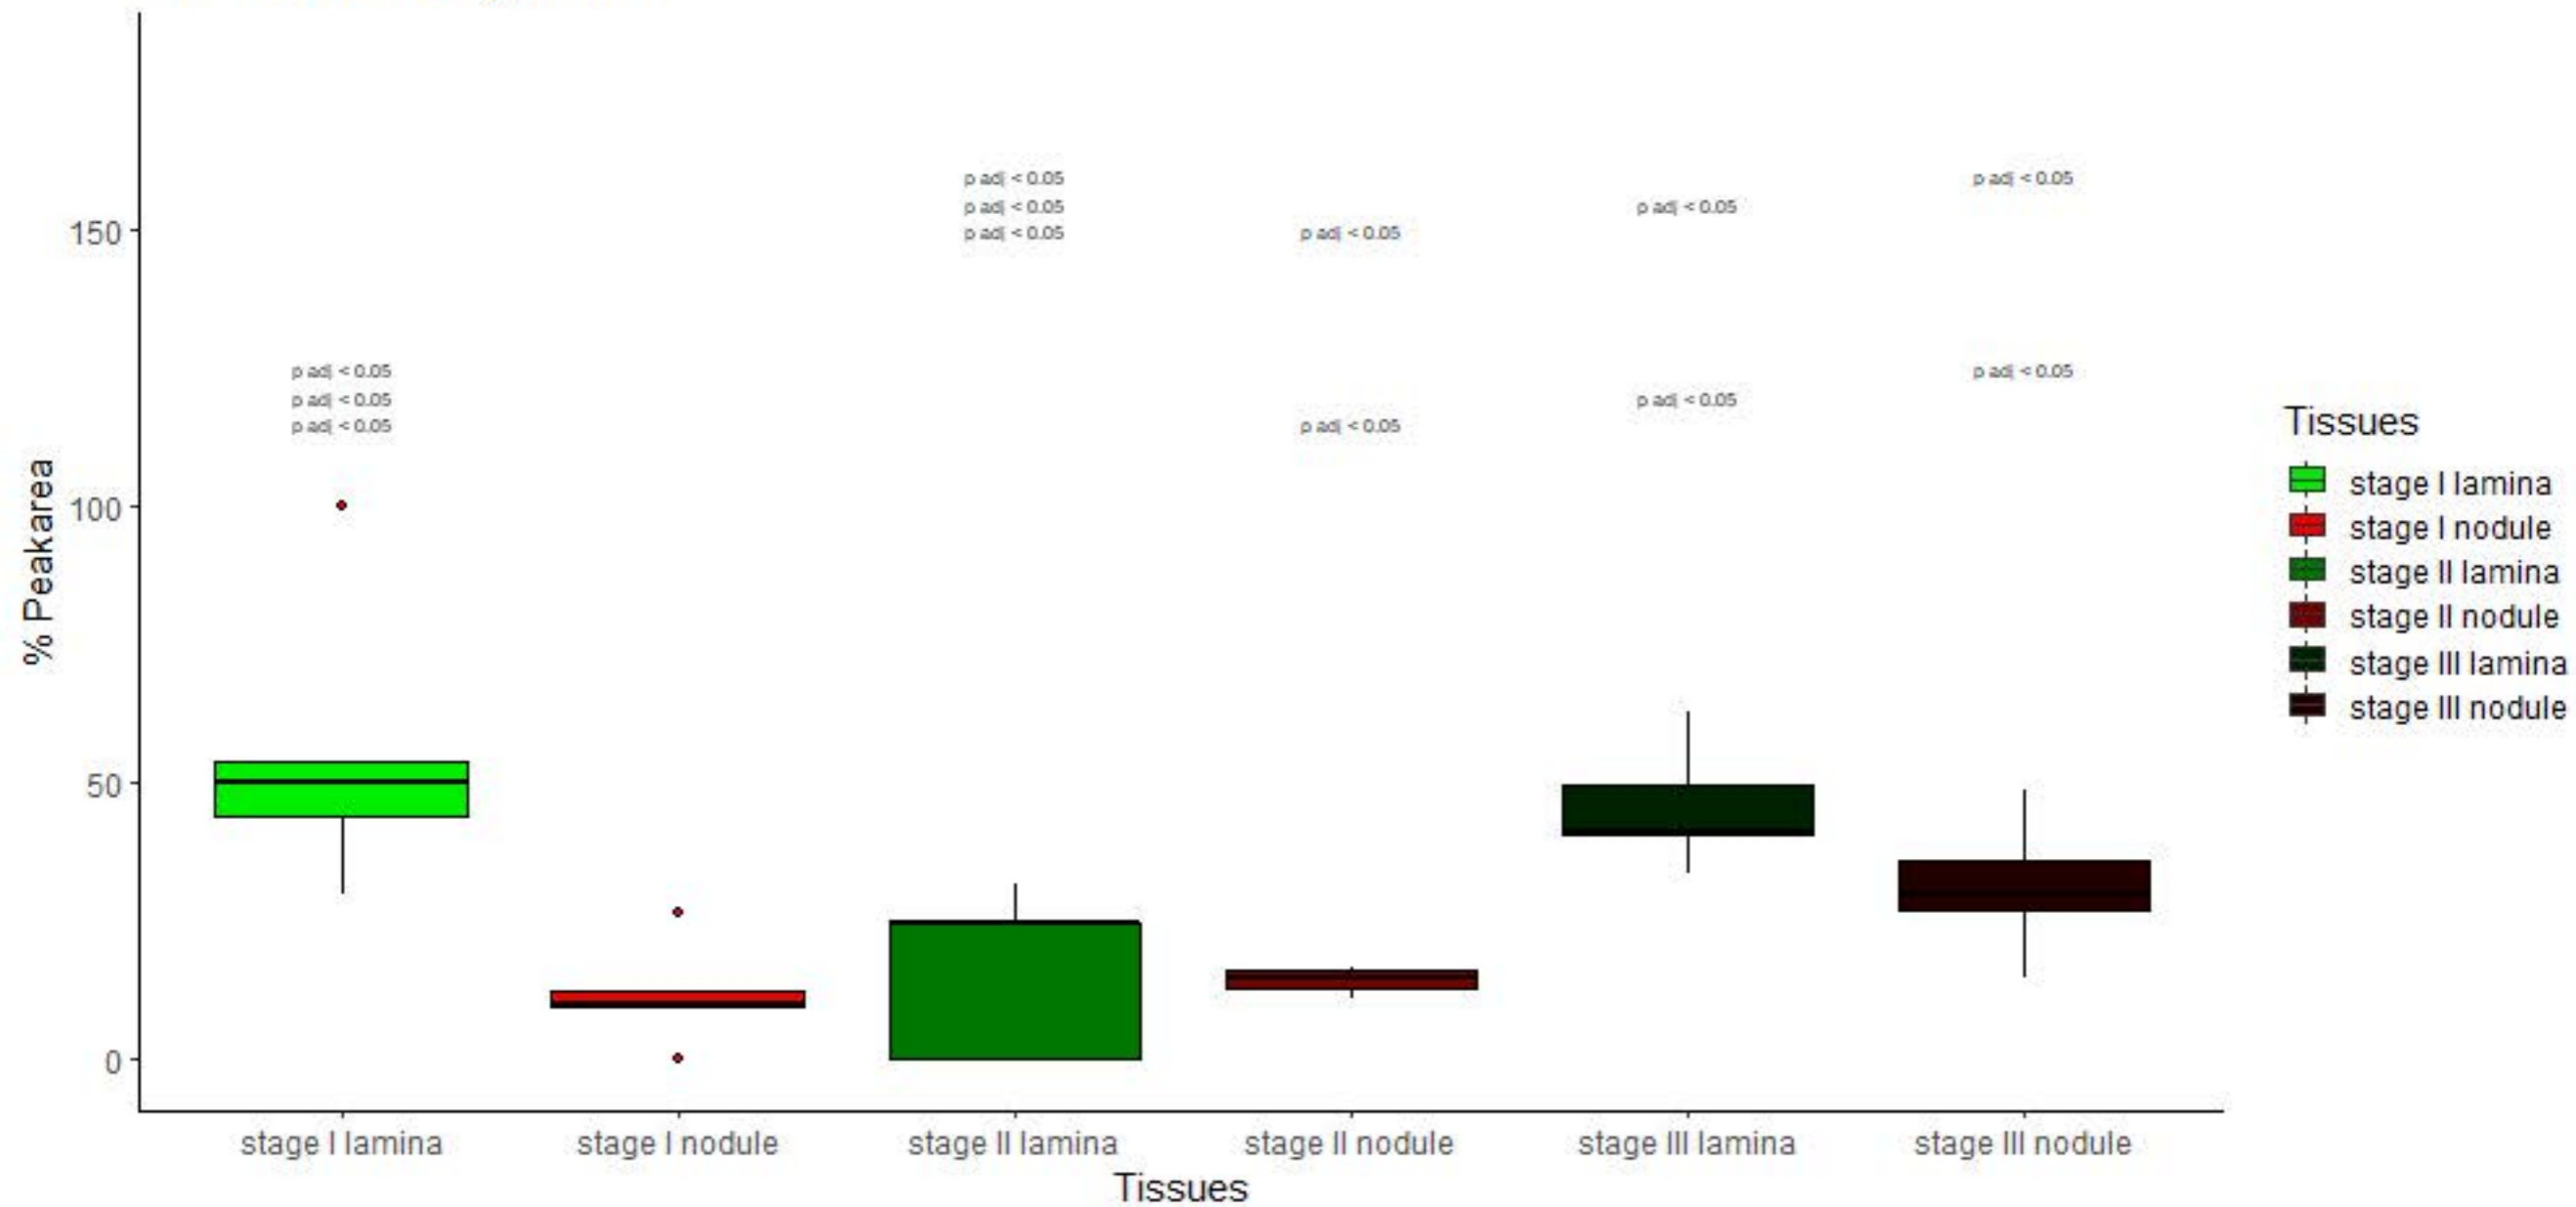

# NA 166 Carbohydrate

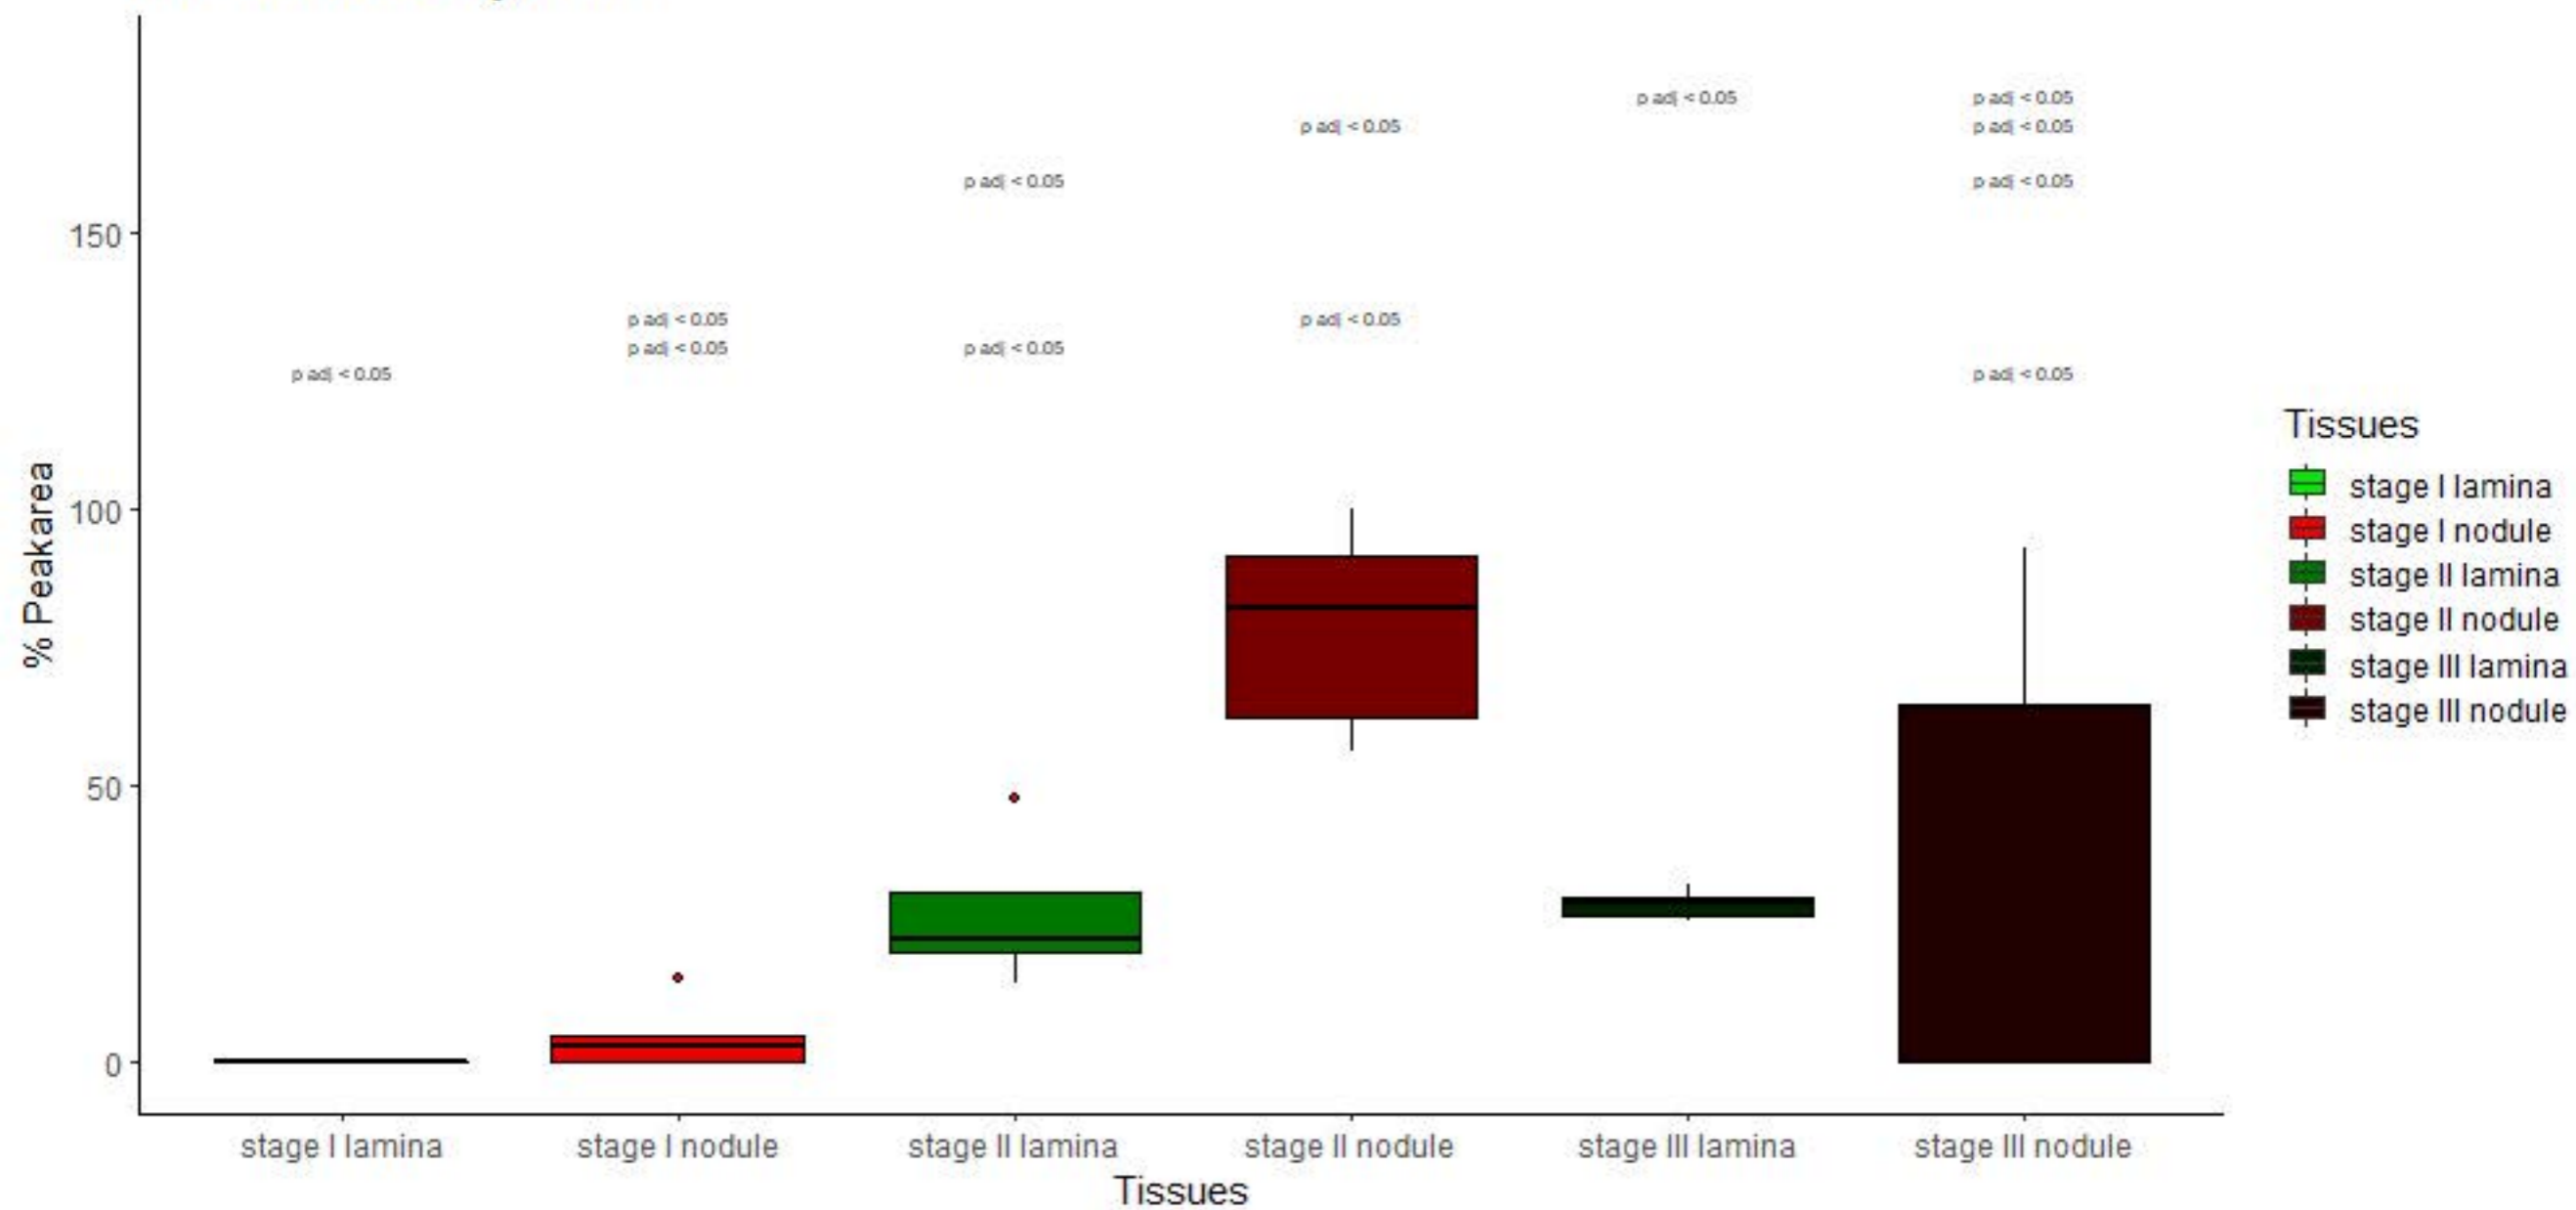



# NA 167 Carbohydrate

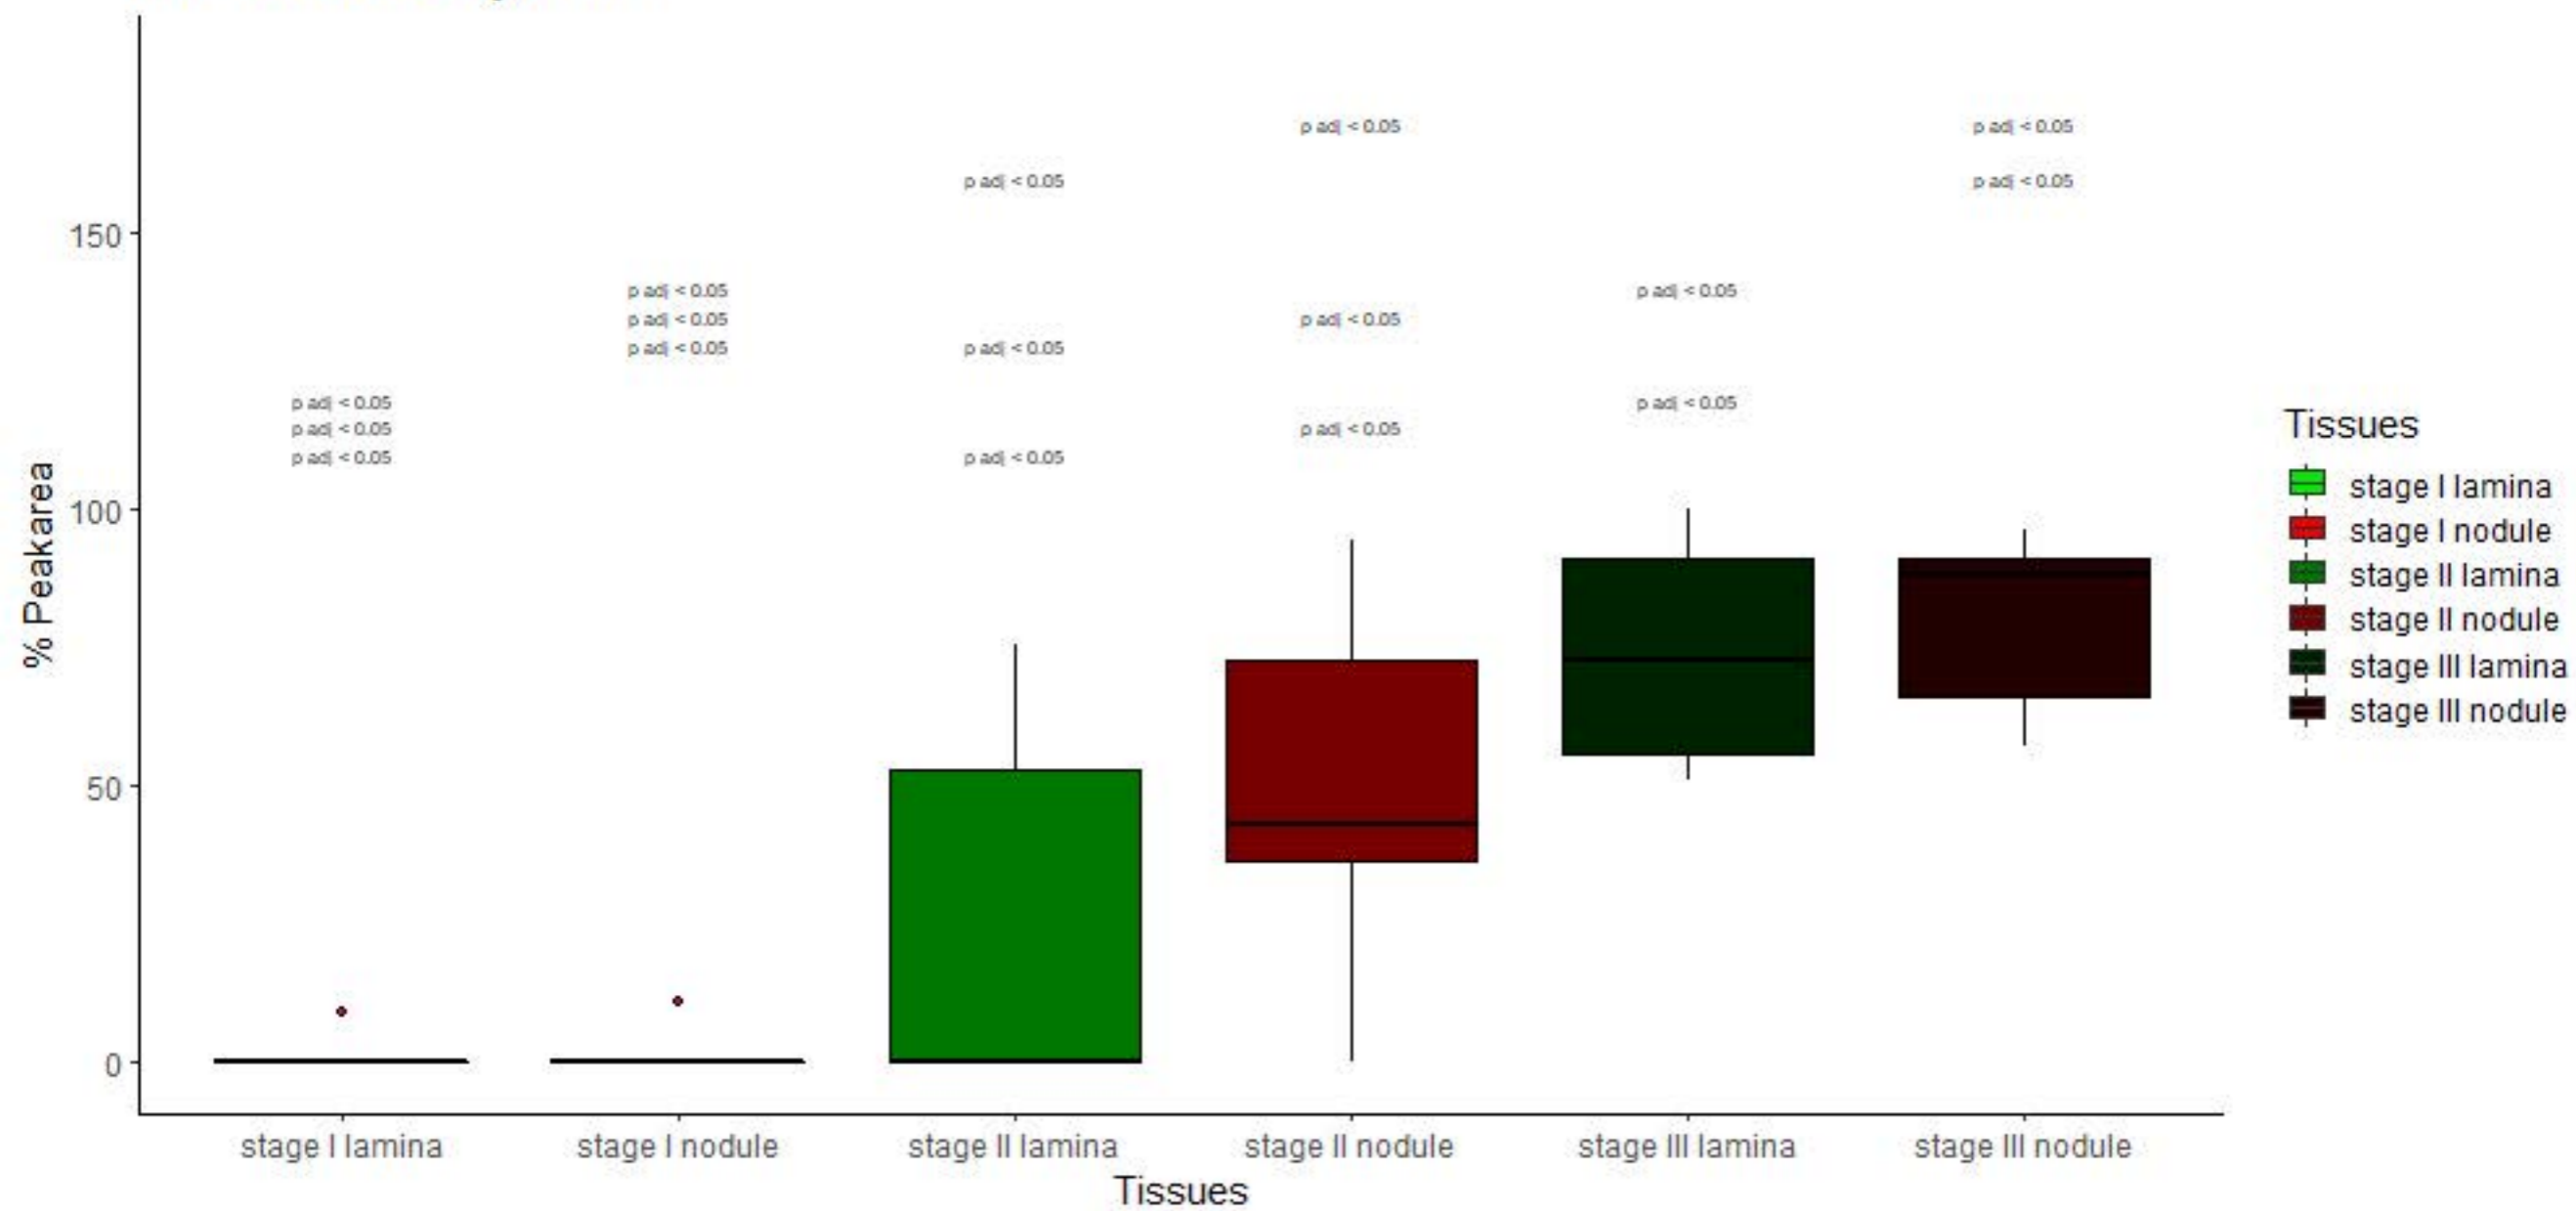

# NA\_Carbohydrate? RI2929 mz 397, 485, 514

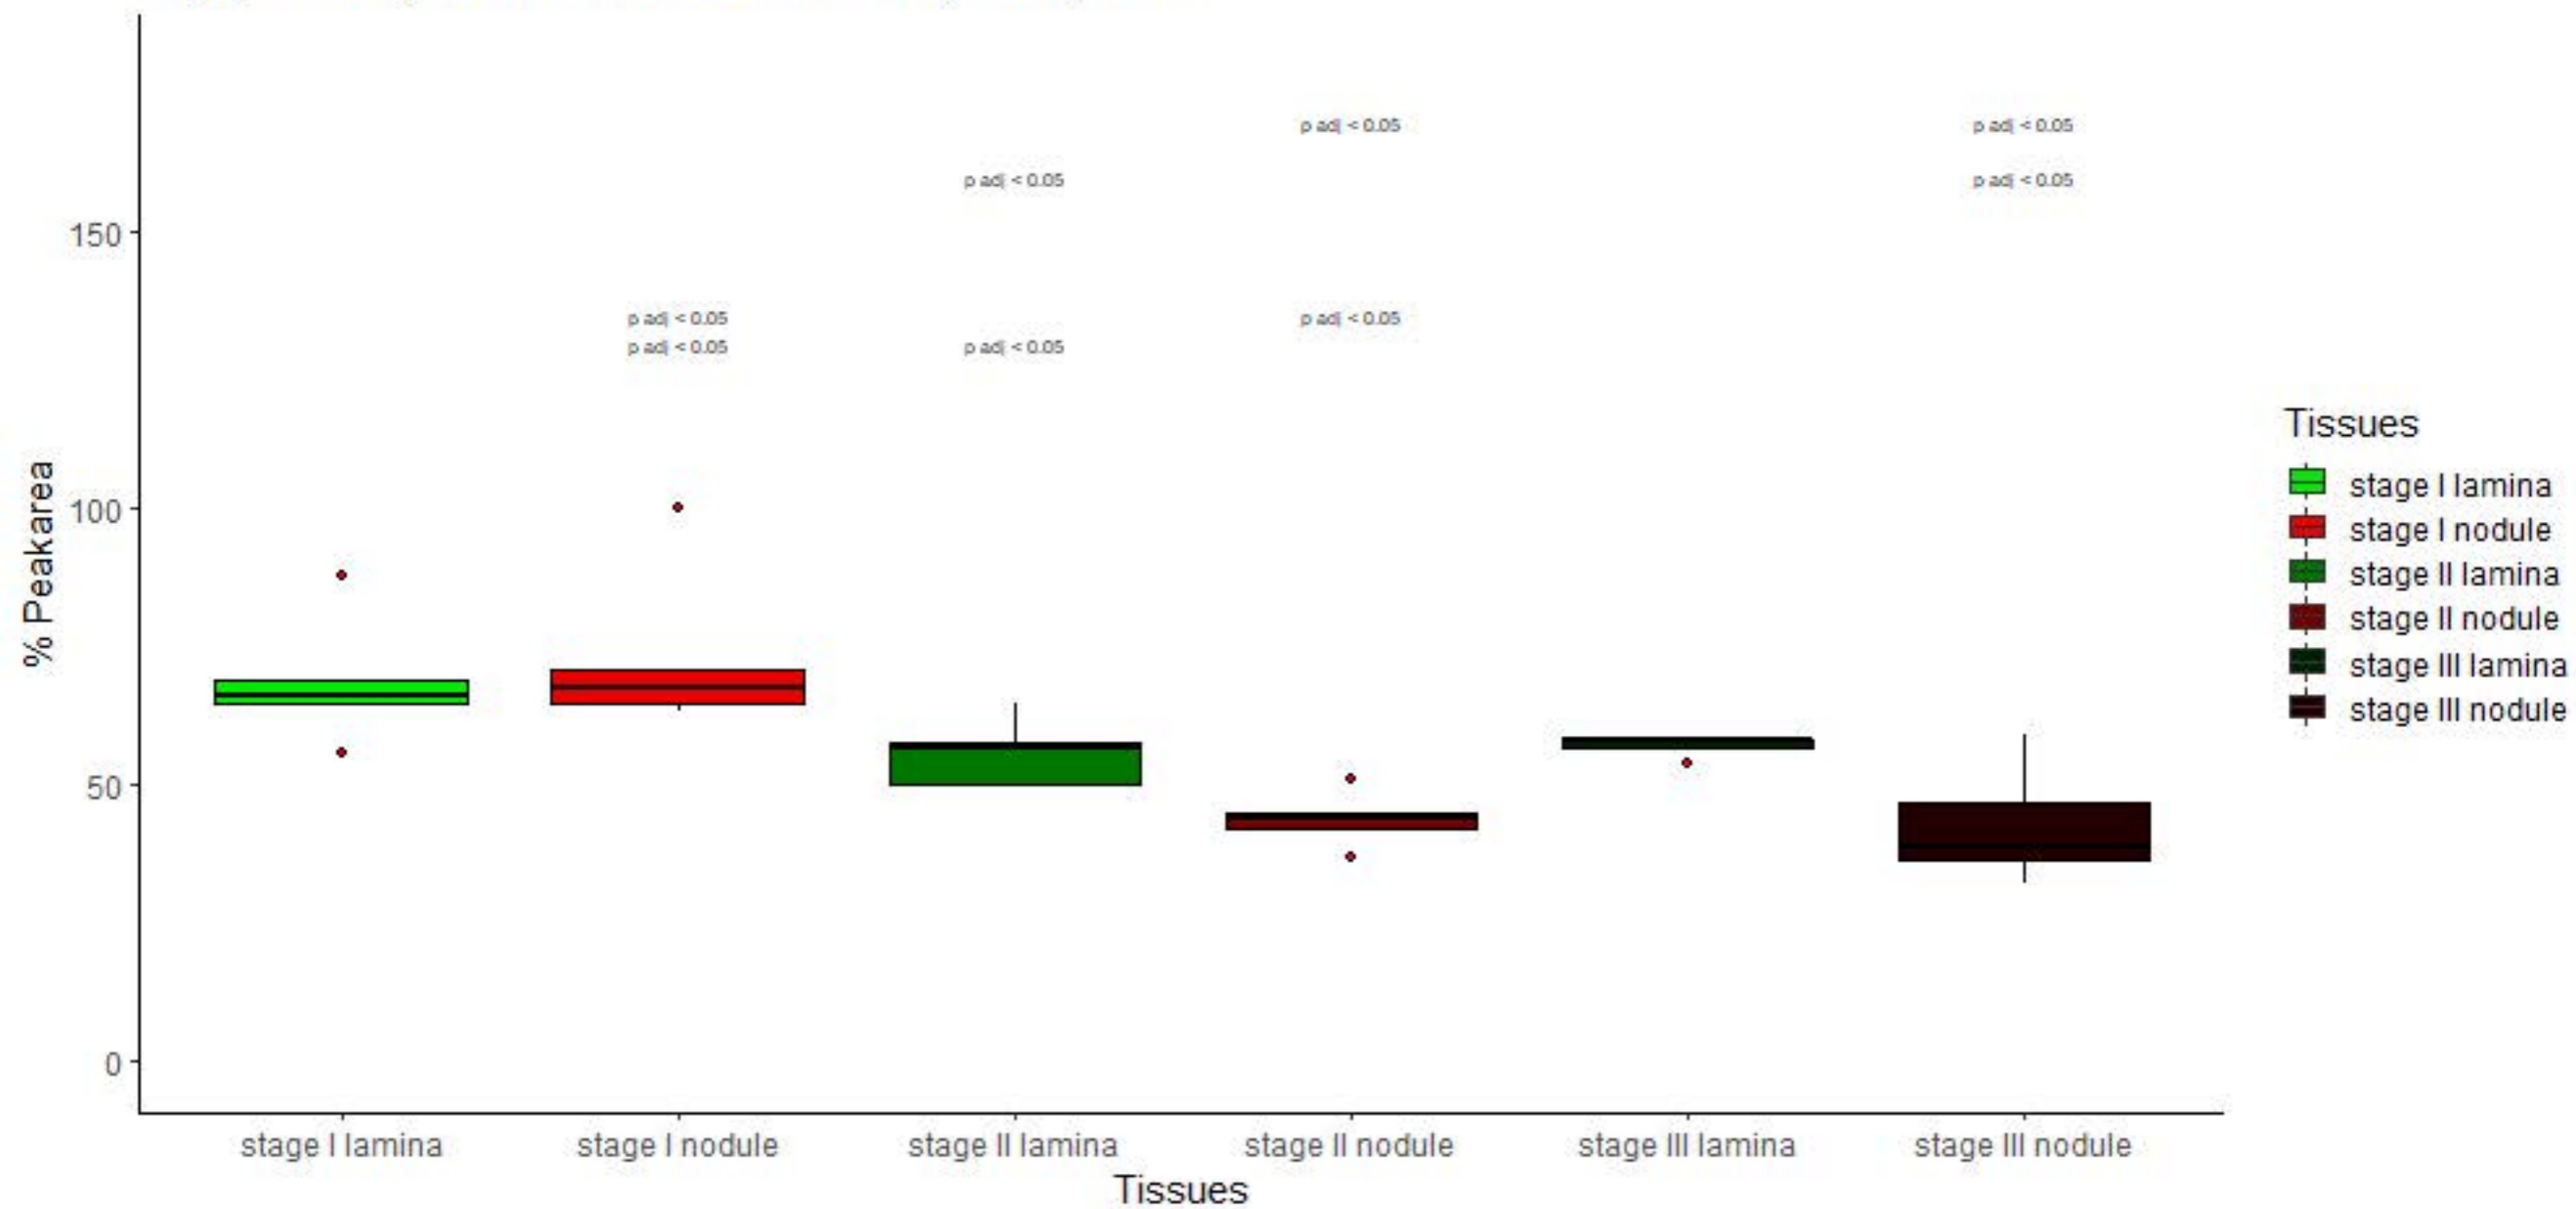

# NA carbohydrate 96

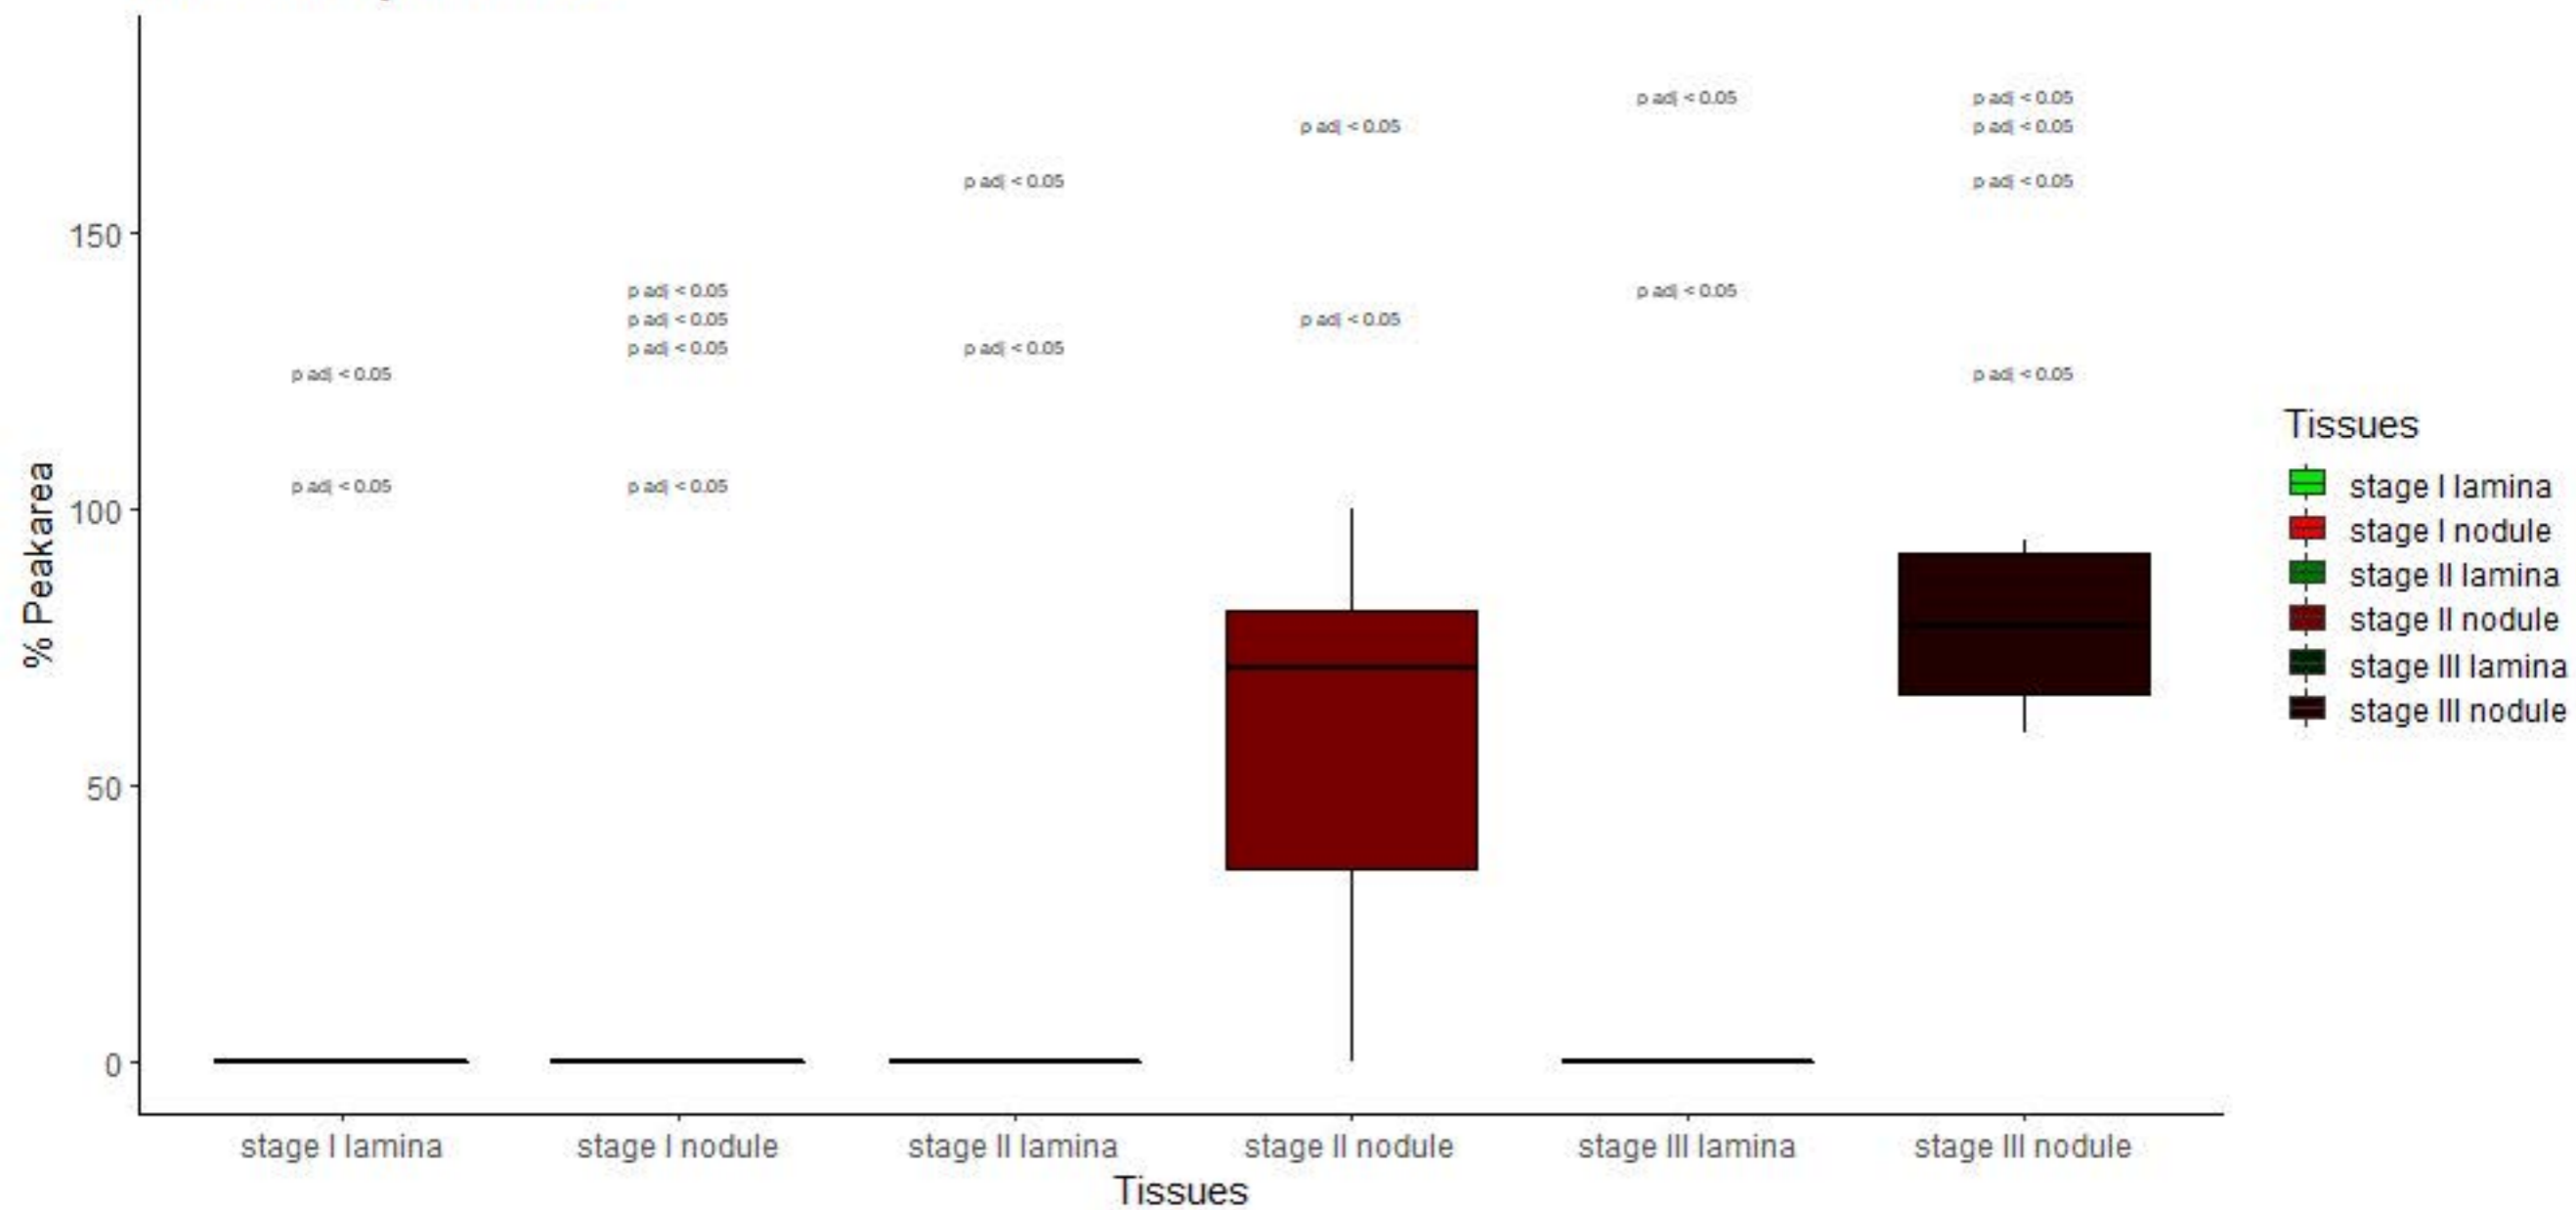

# NA Sugar acid 172

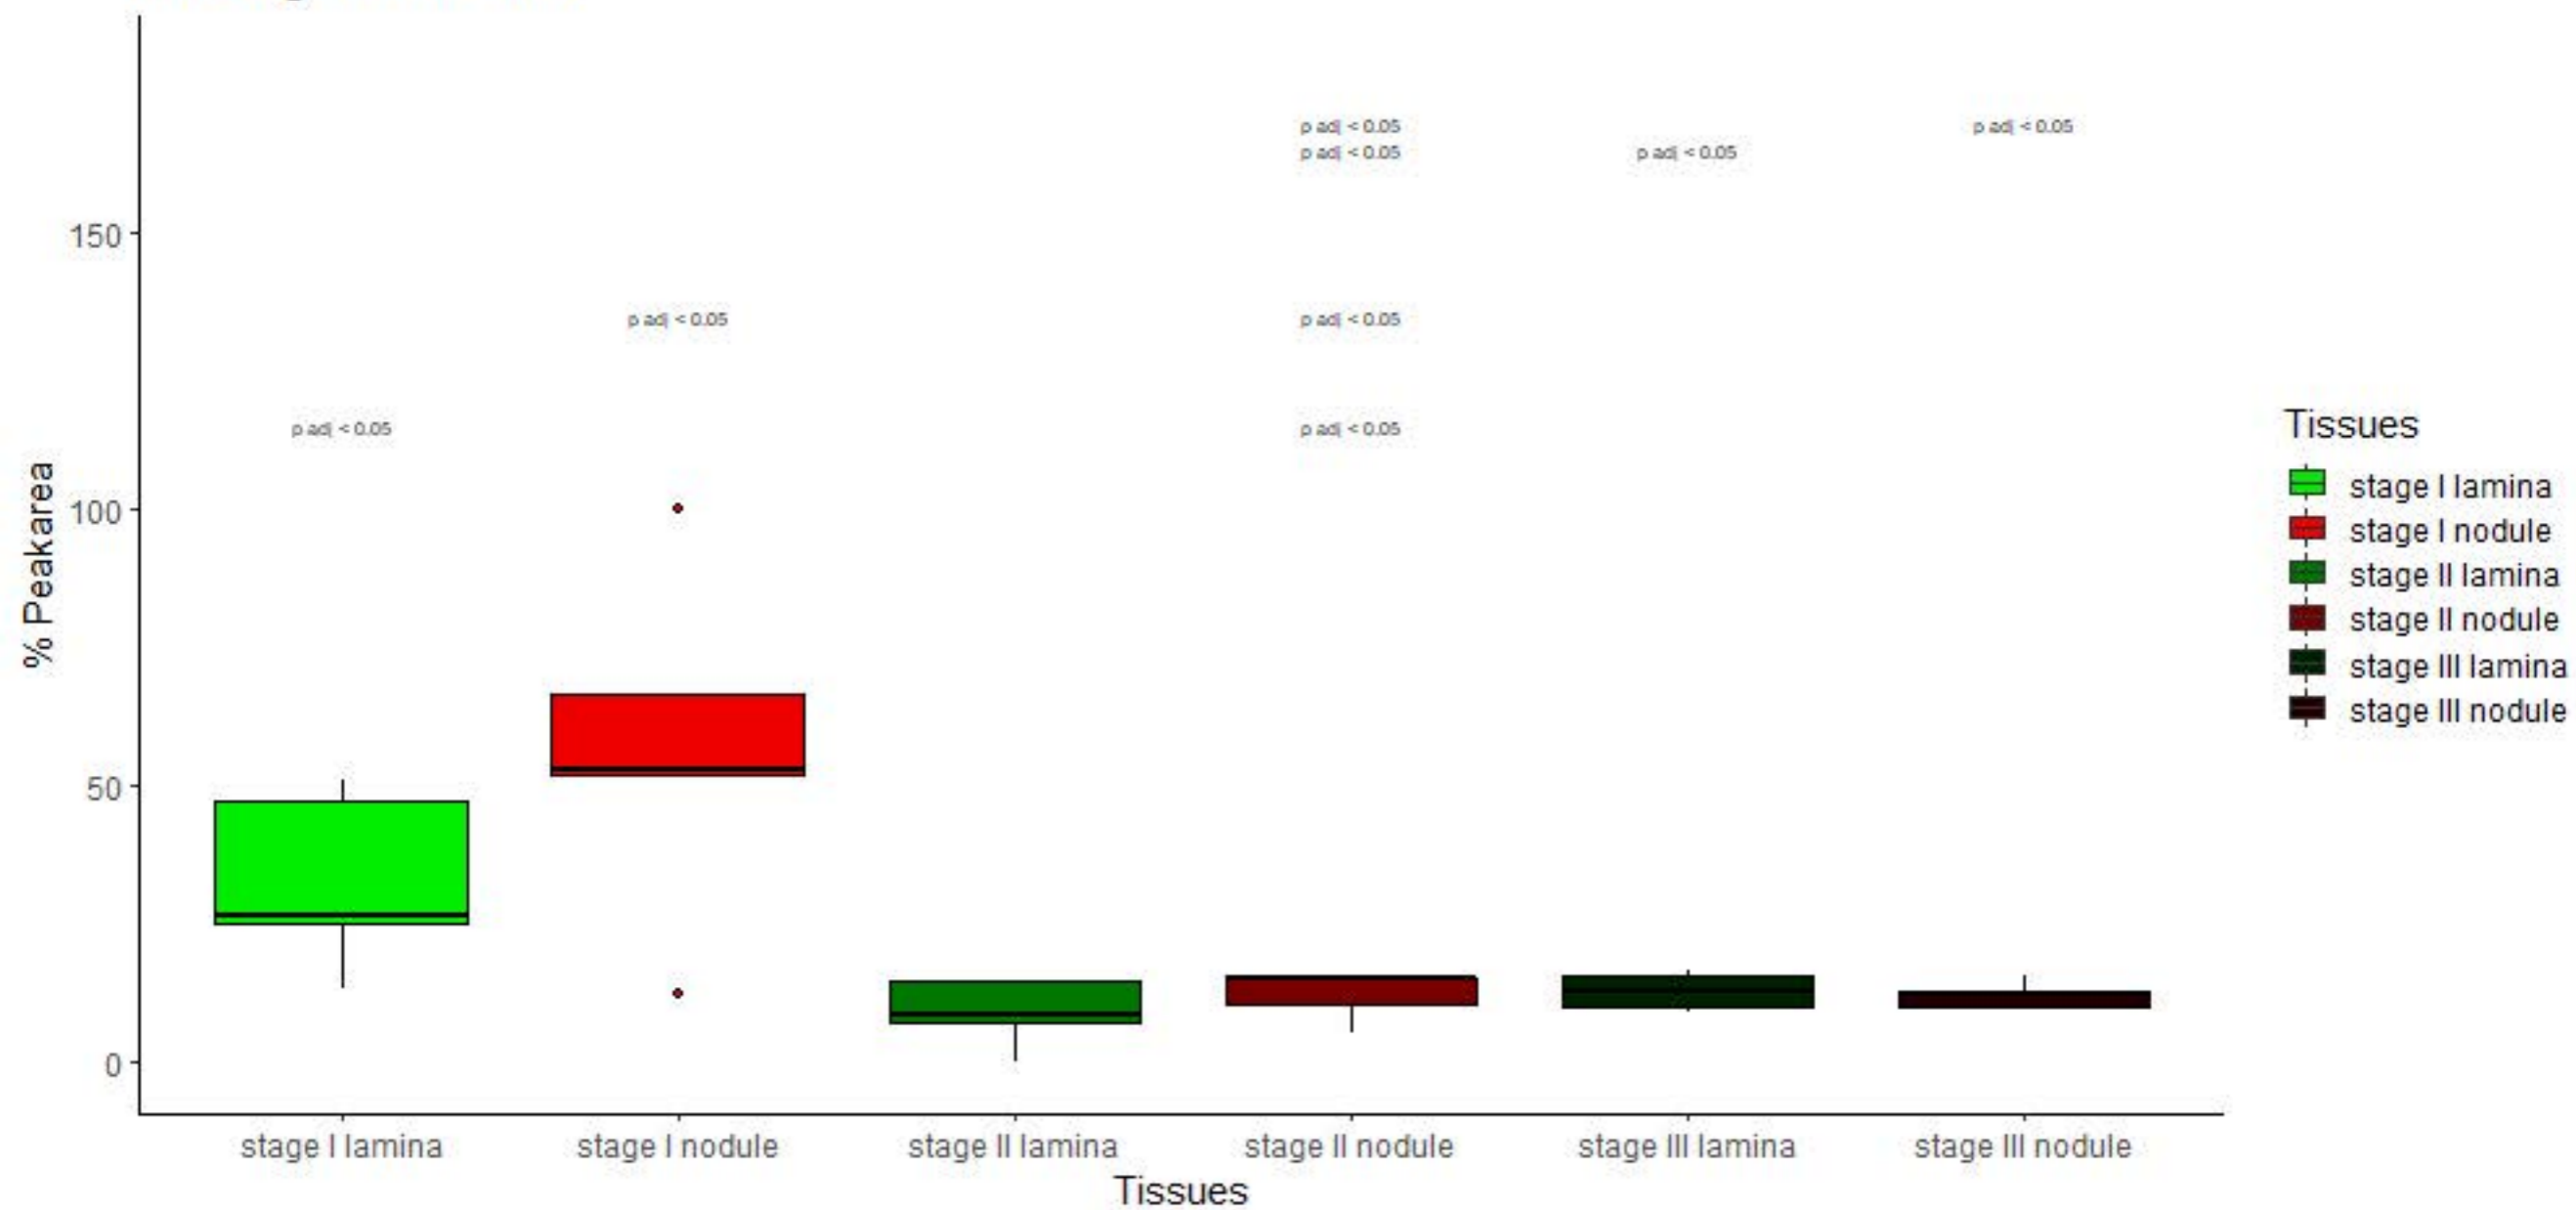

# NA Polysaccharide 142 (??6-Kestose)

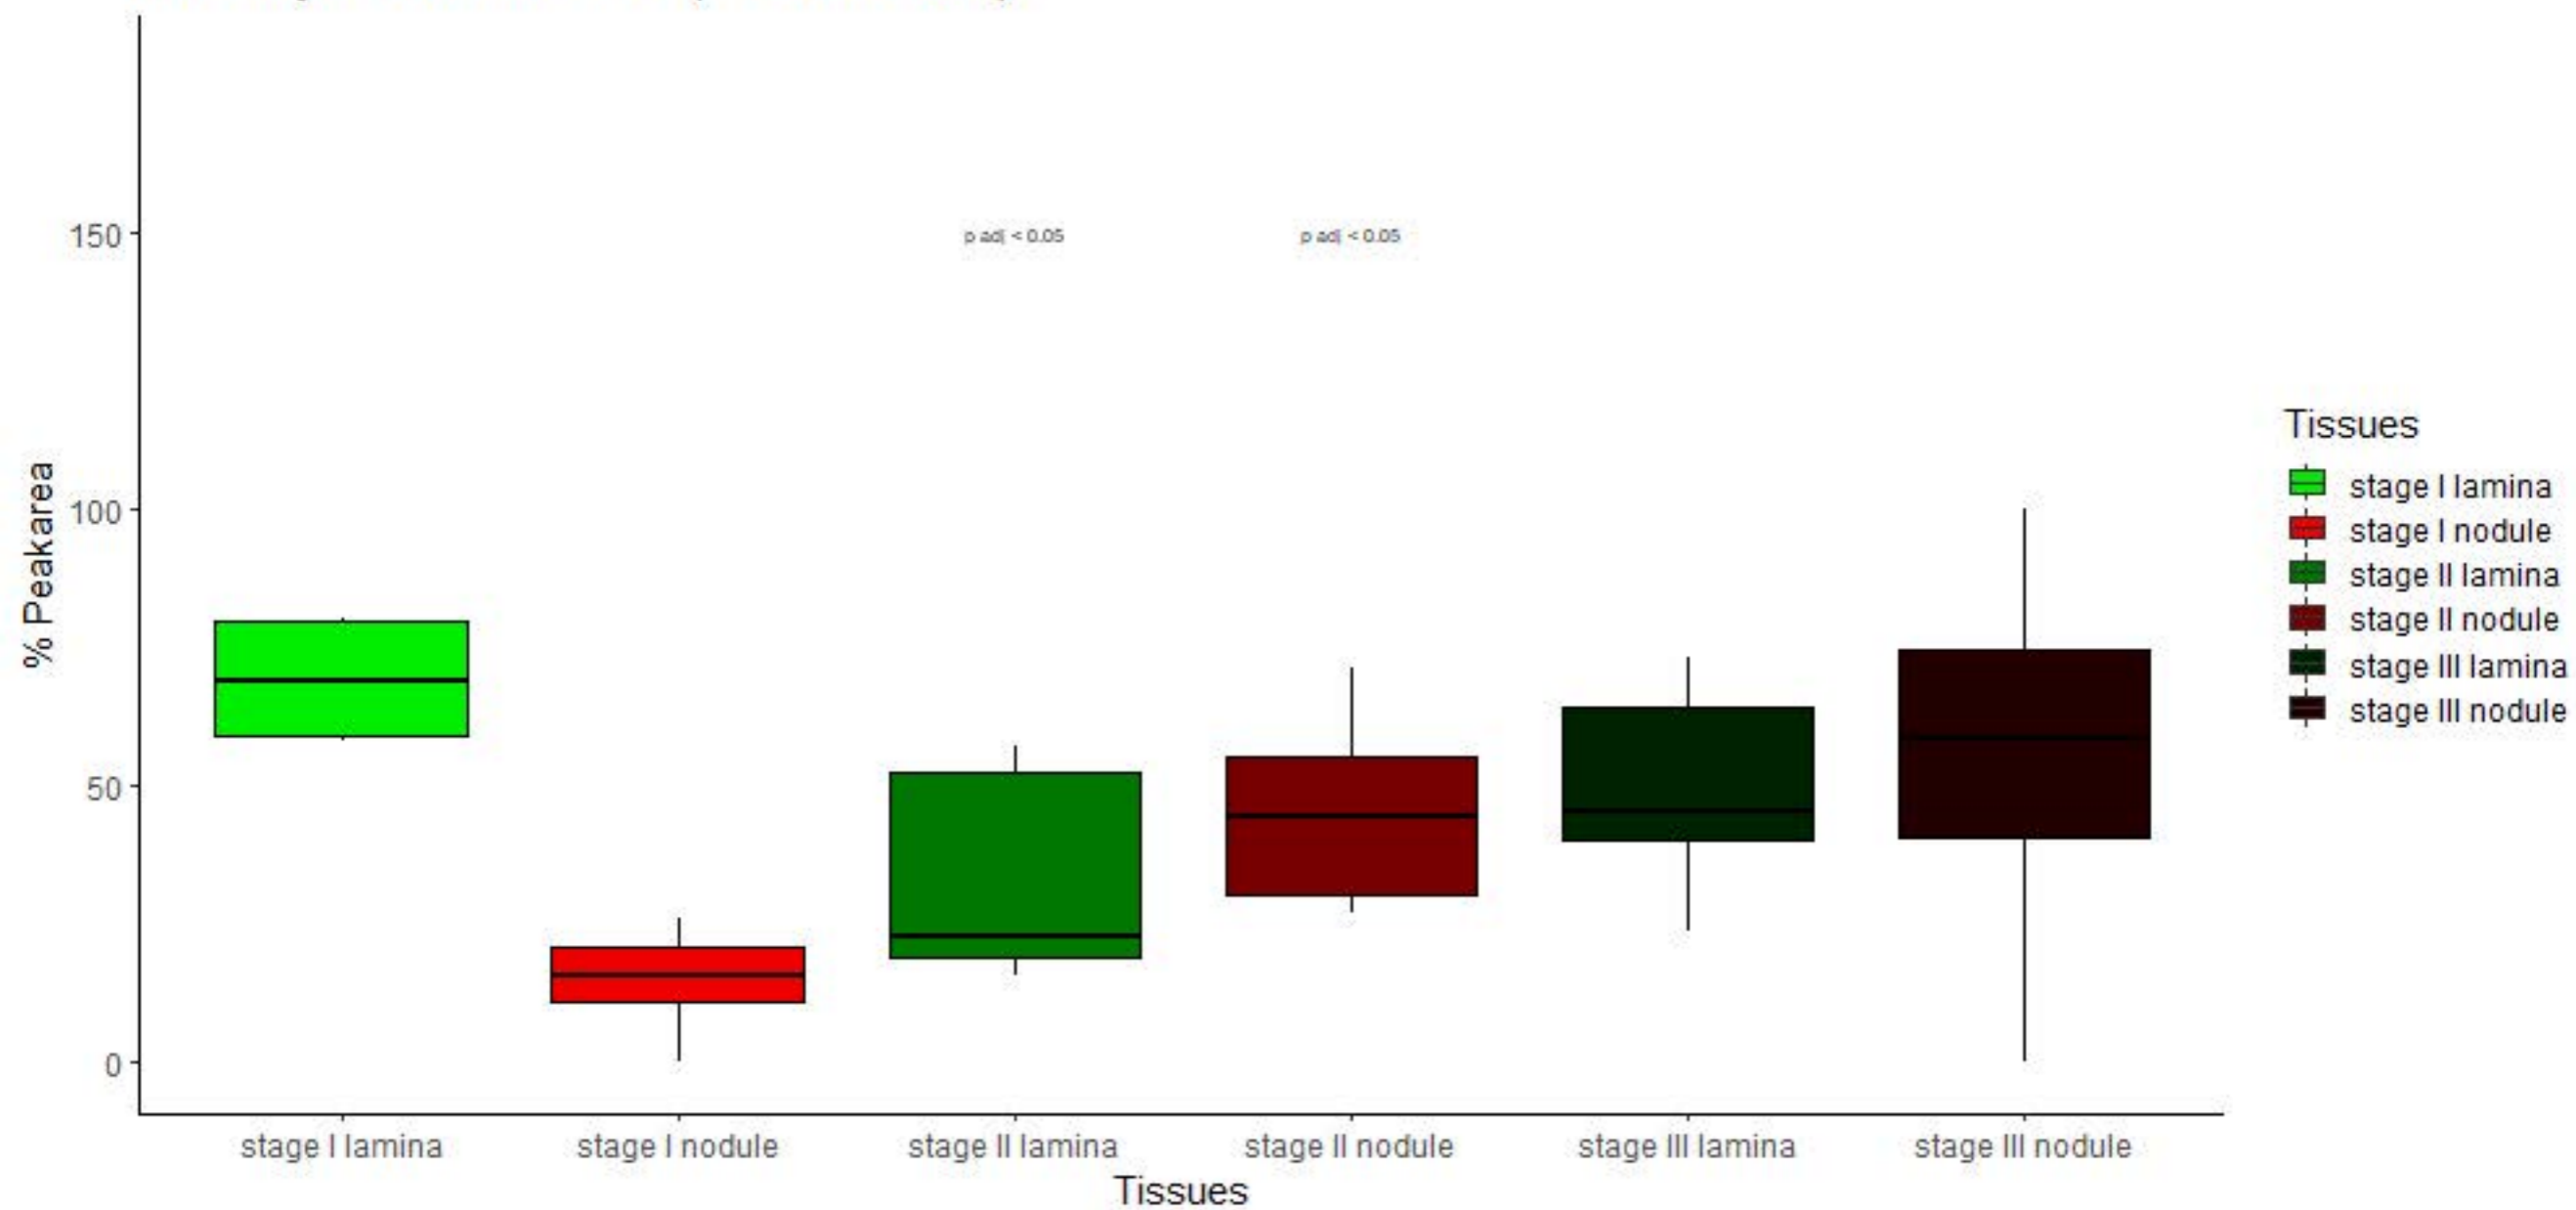

# NA Polysaccharide 144

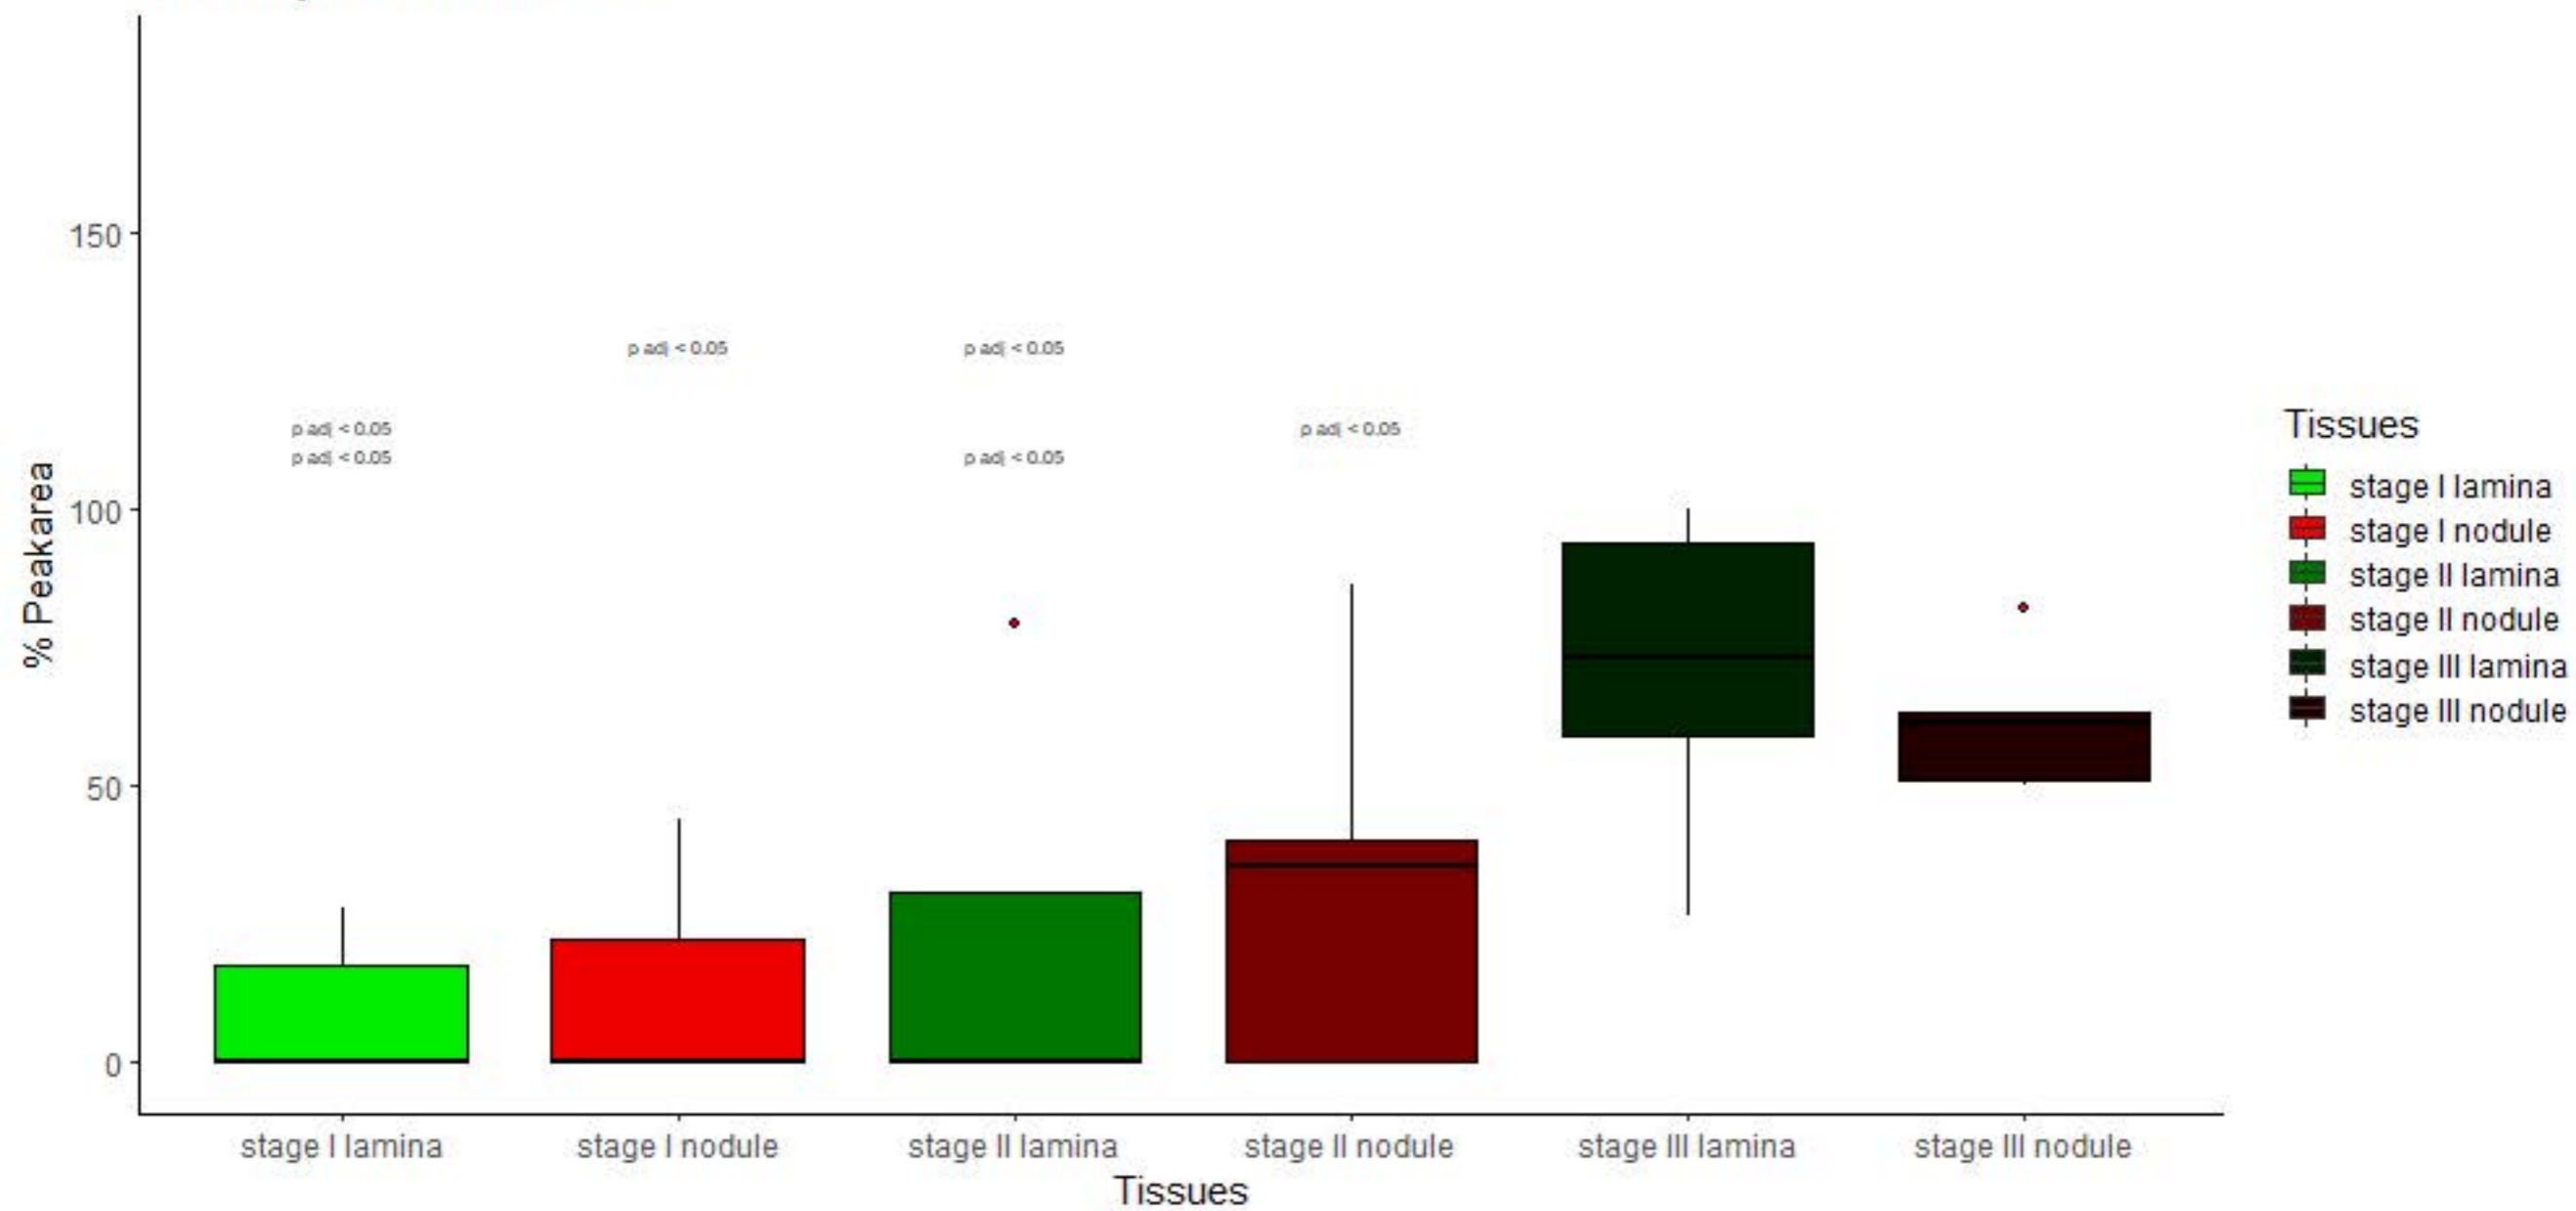

# NA Polysaccharide 145 (??Maltotriose (1MEOX) (11TMS))

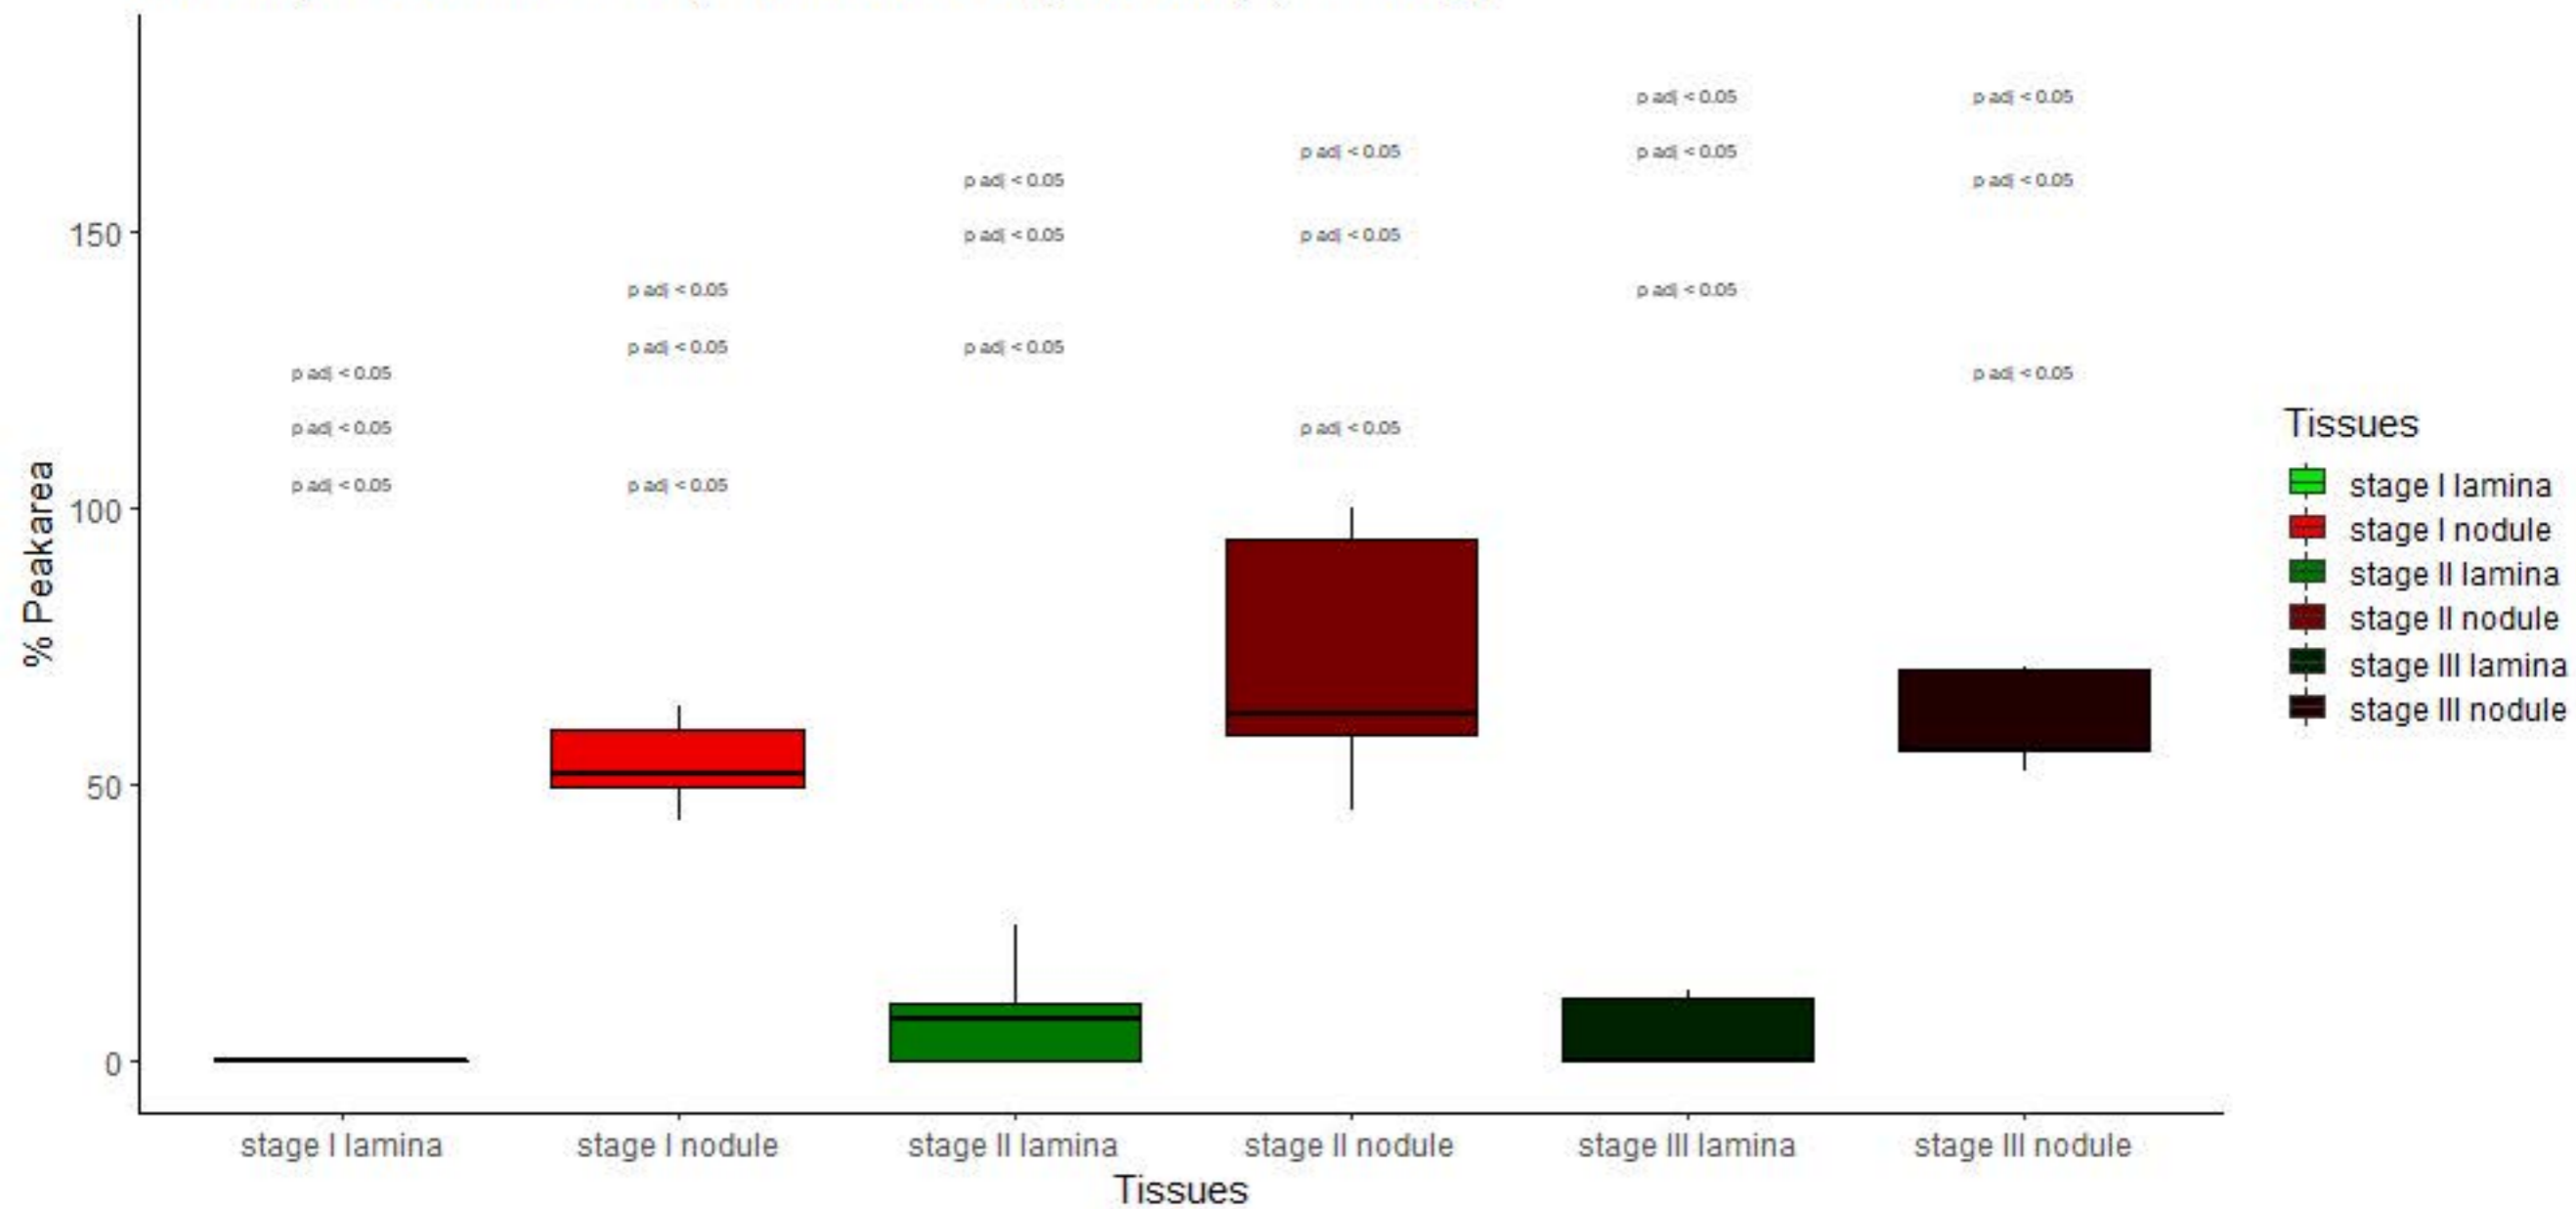

# NA Polysaccharide 56

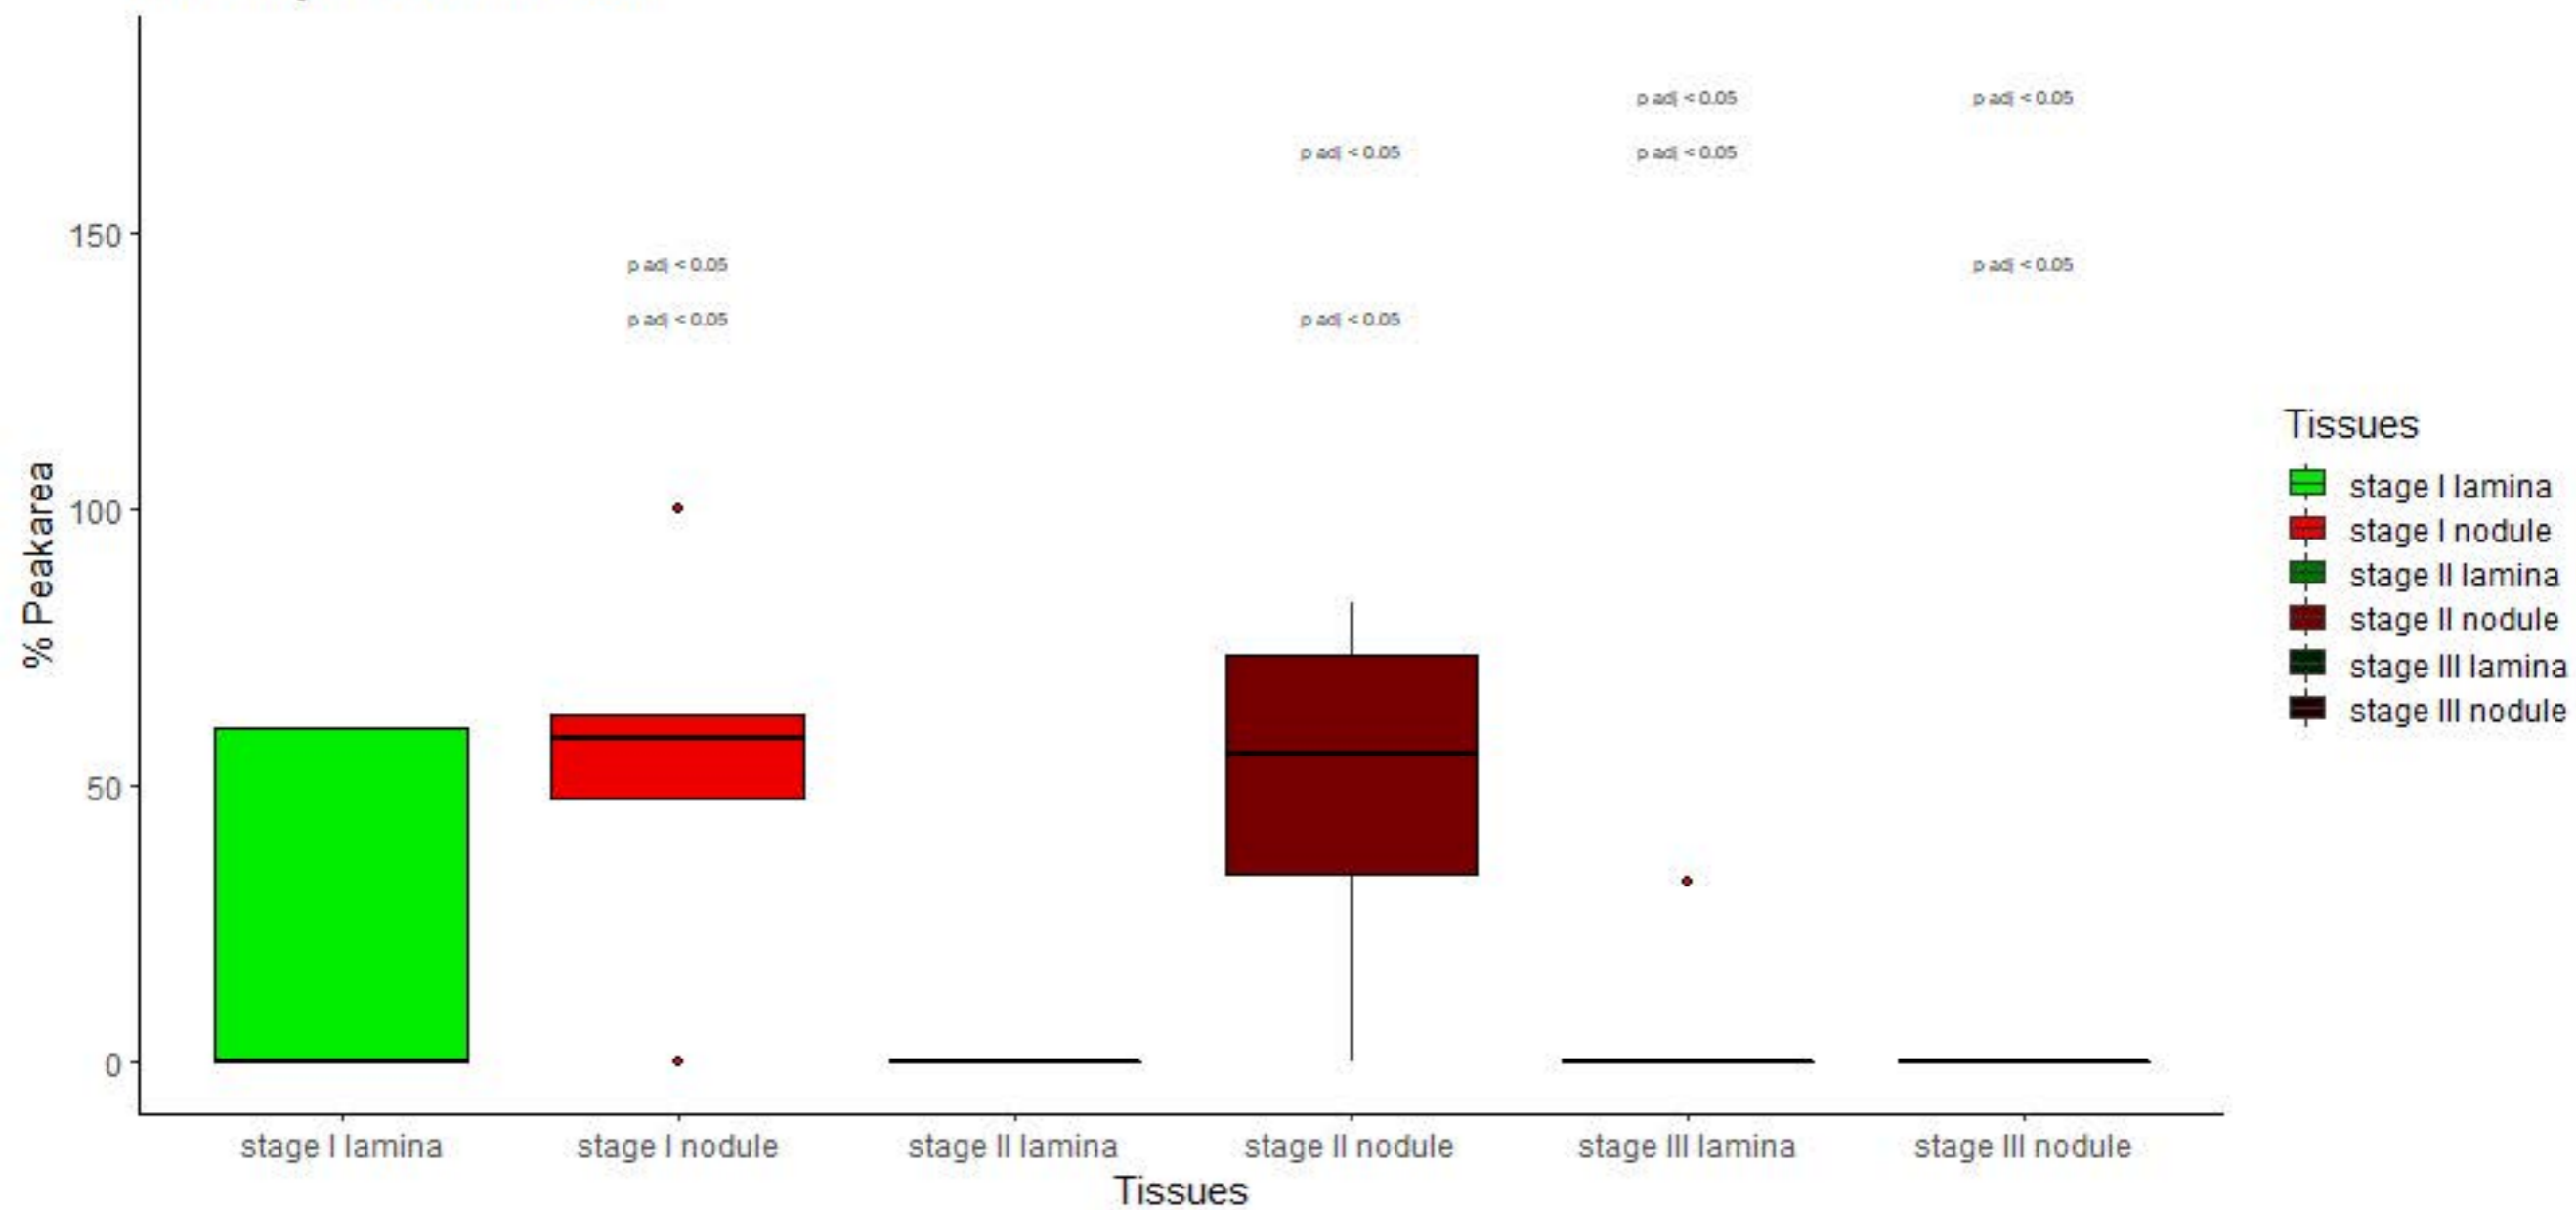



# NA 14 (Inositol like)

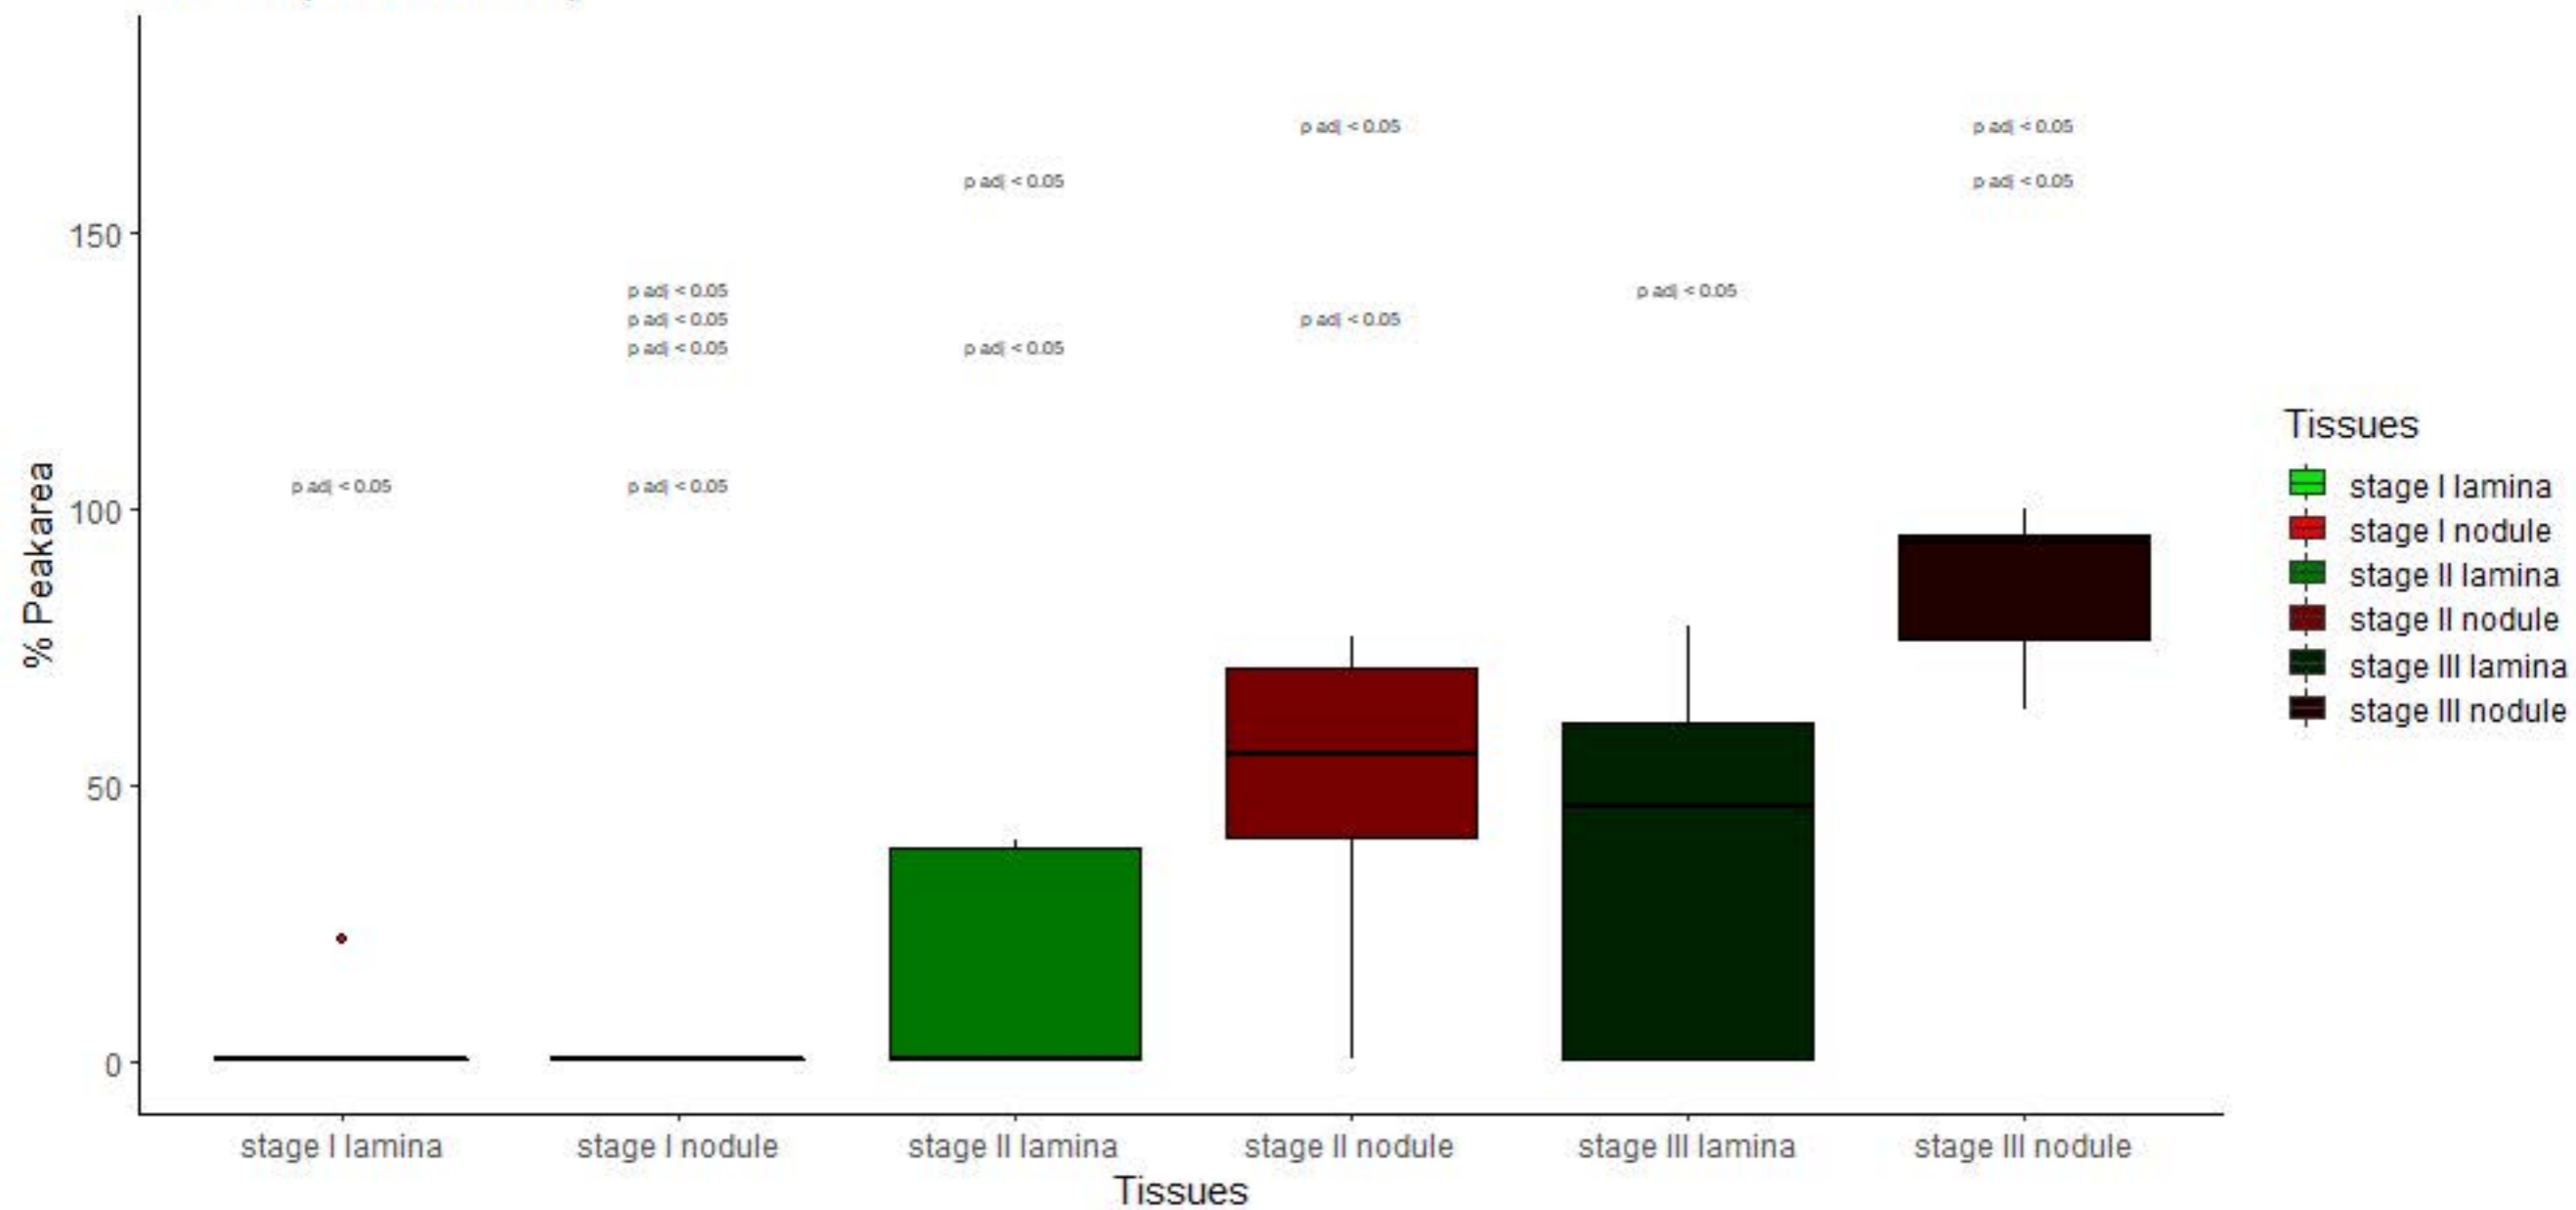

# NA Amine 52

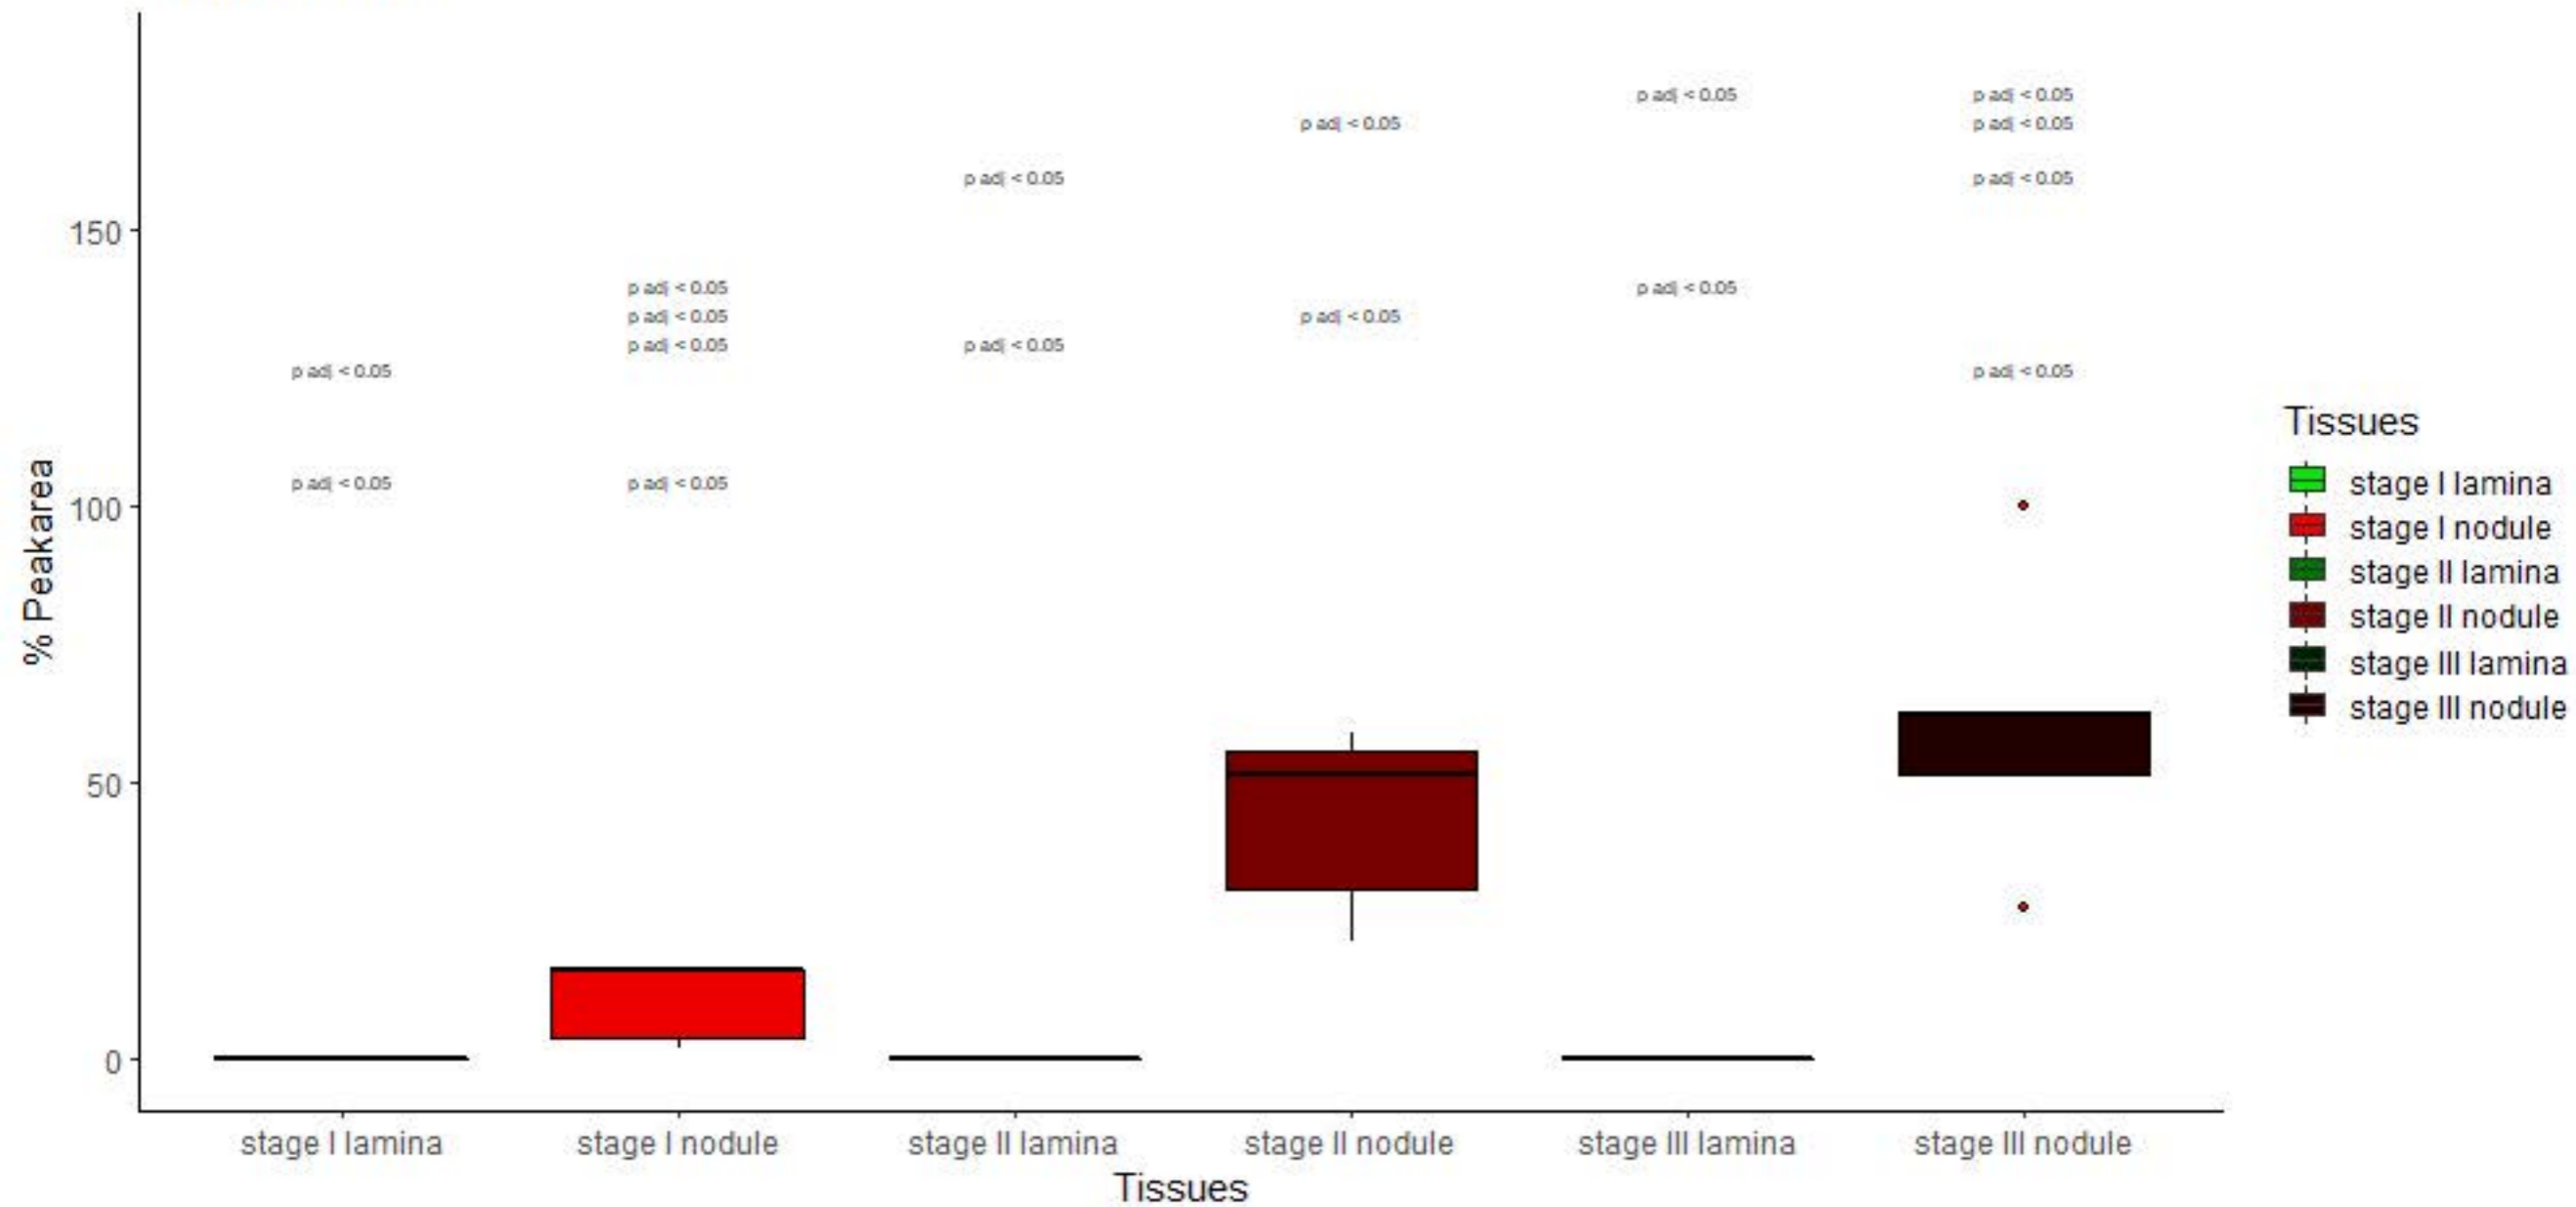

# NA Amine 53

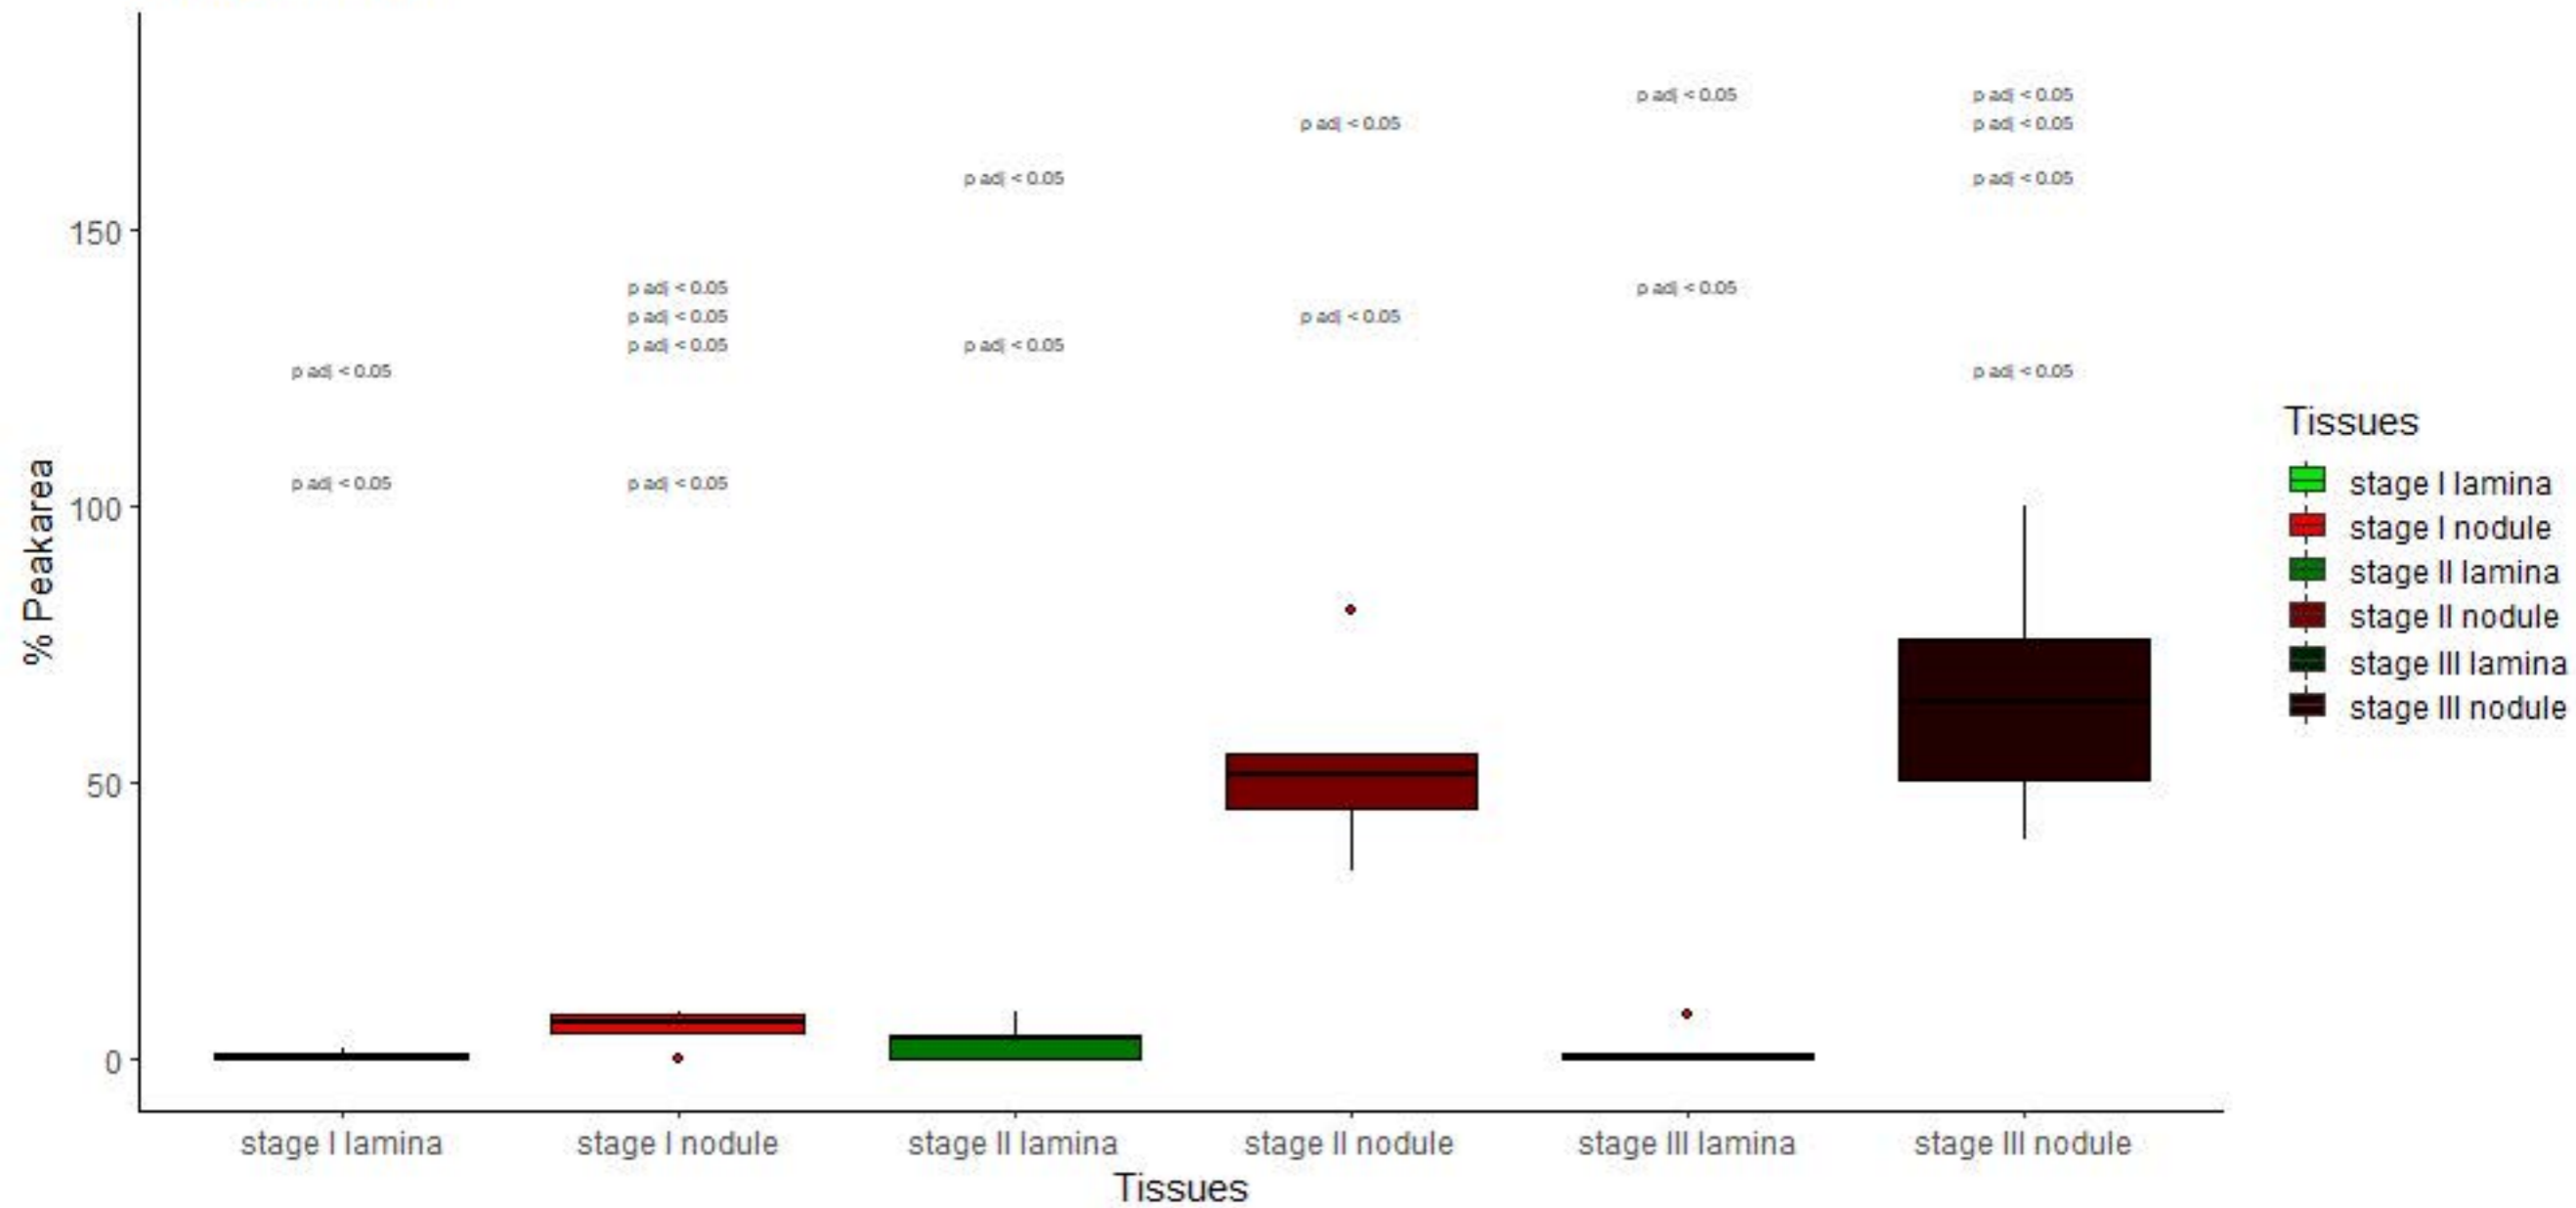

# NA Amine 54

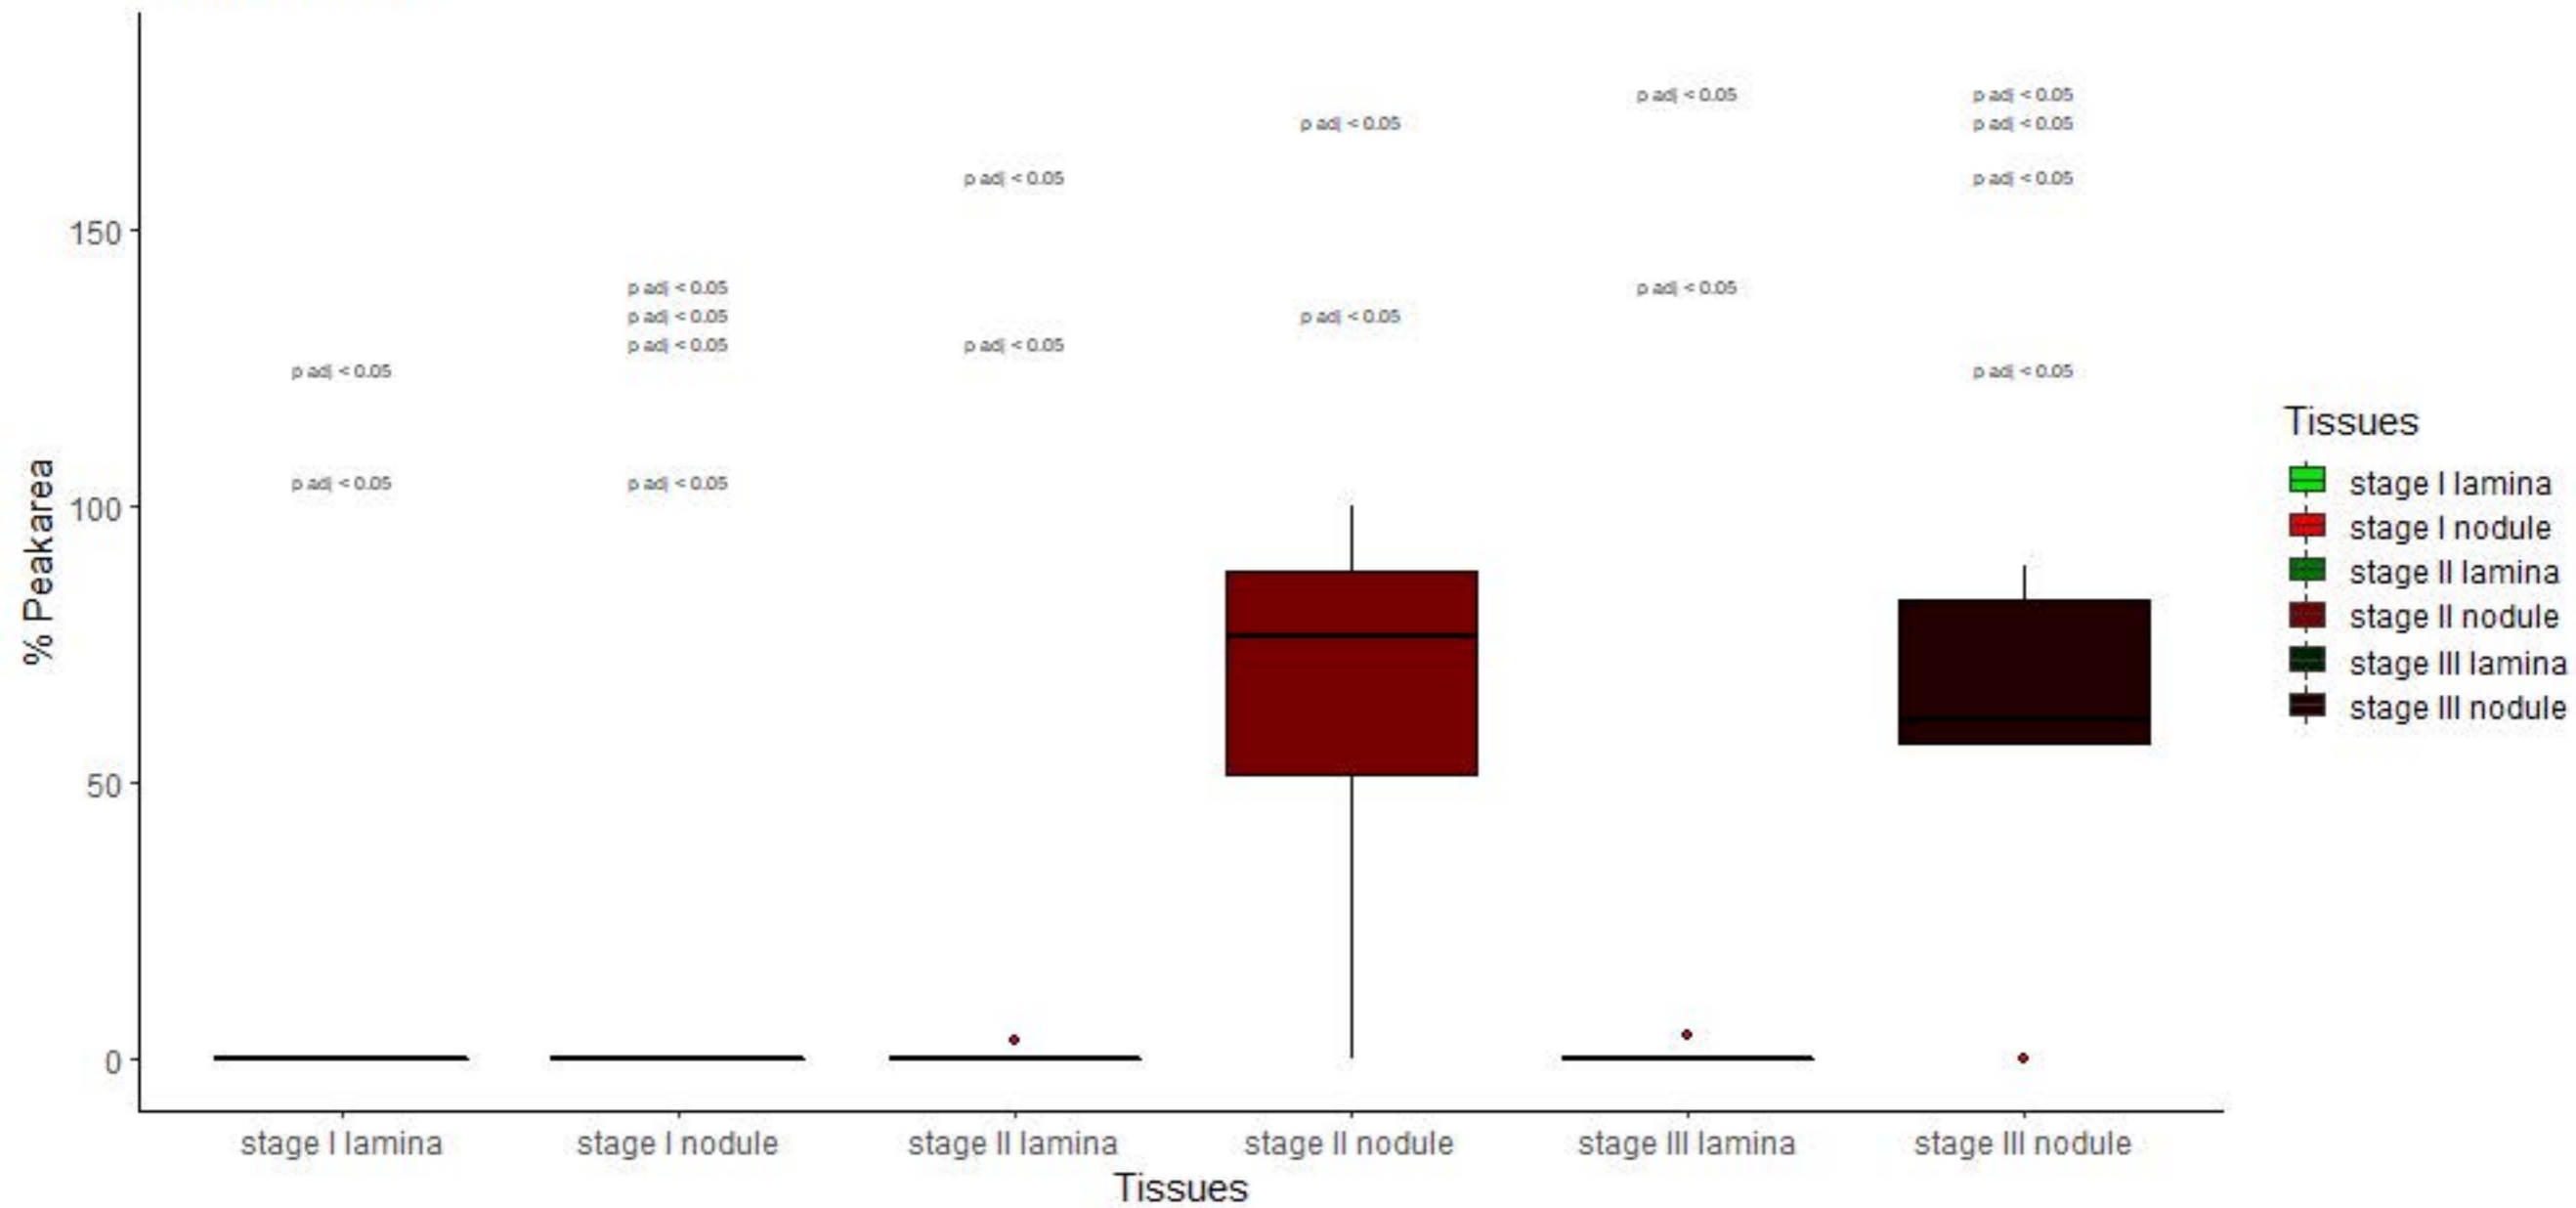

# NA Amine 55

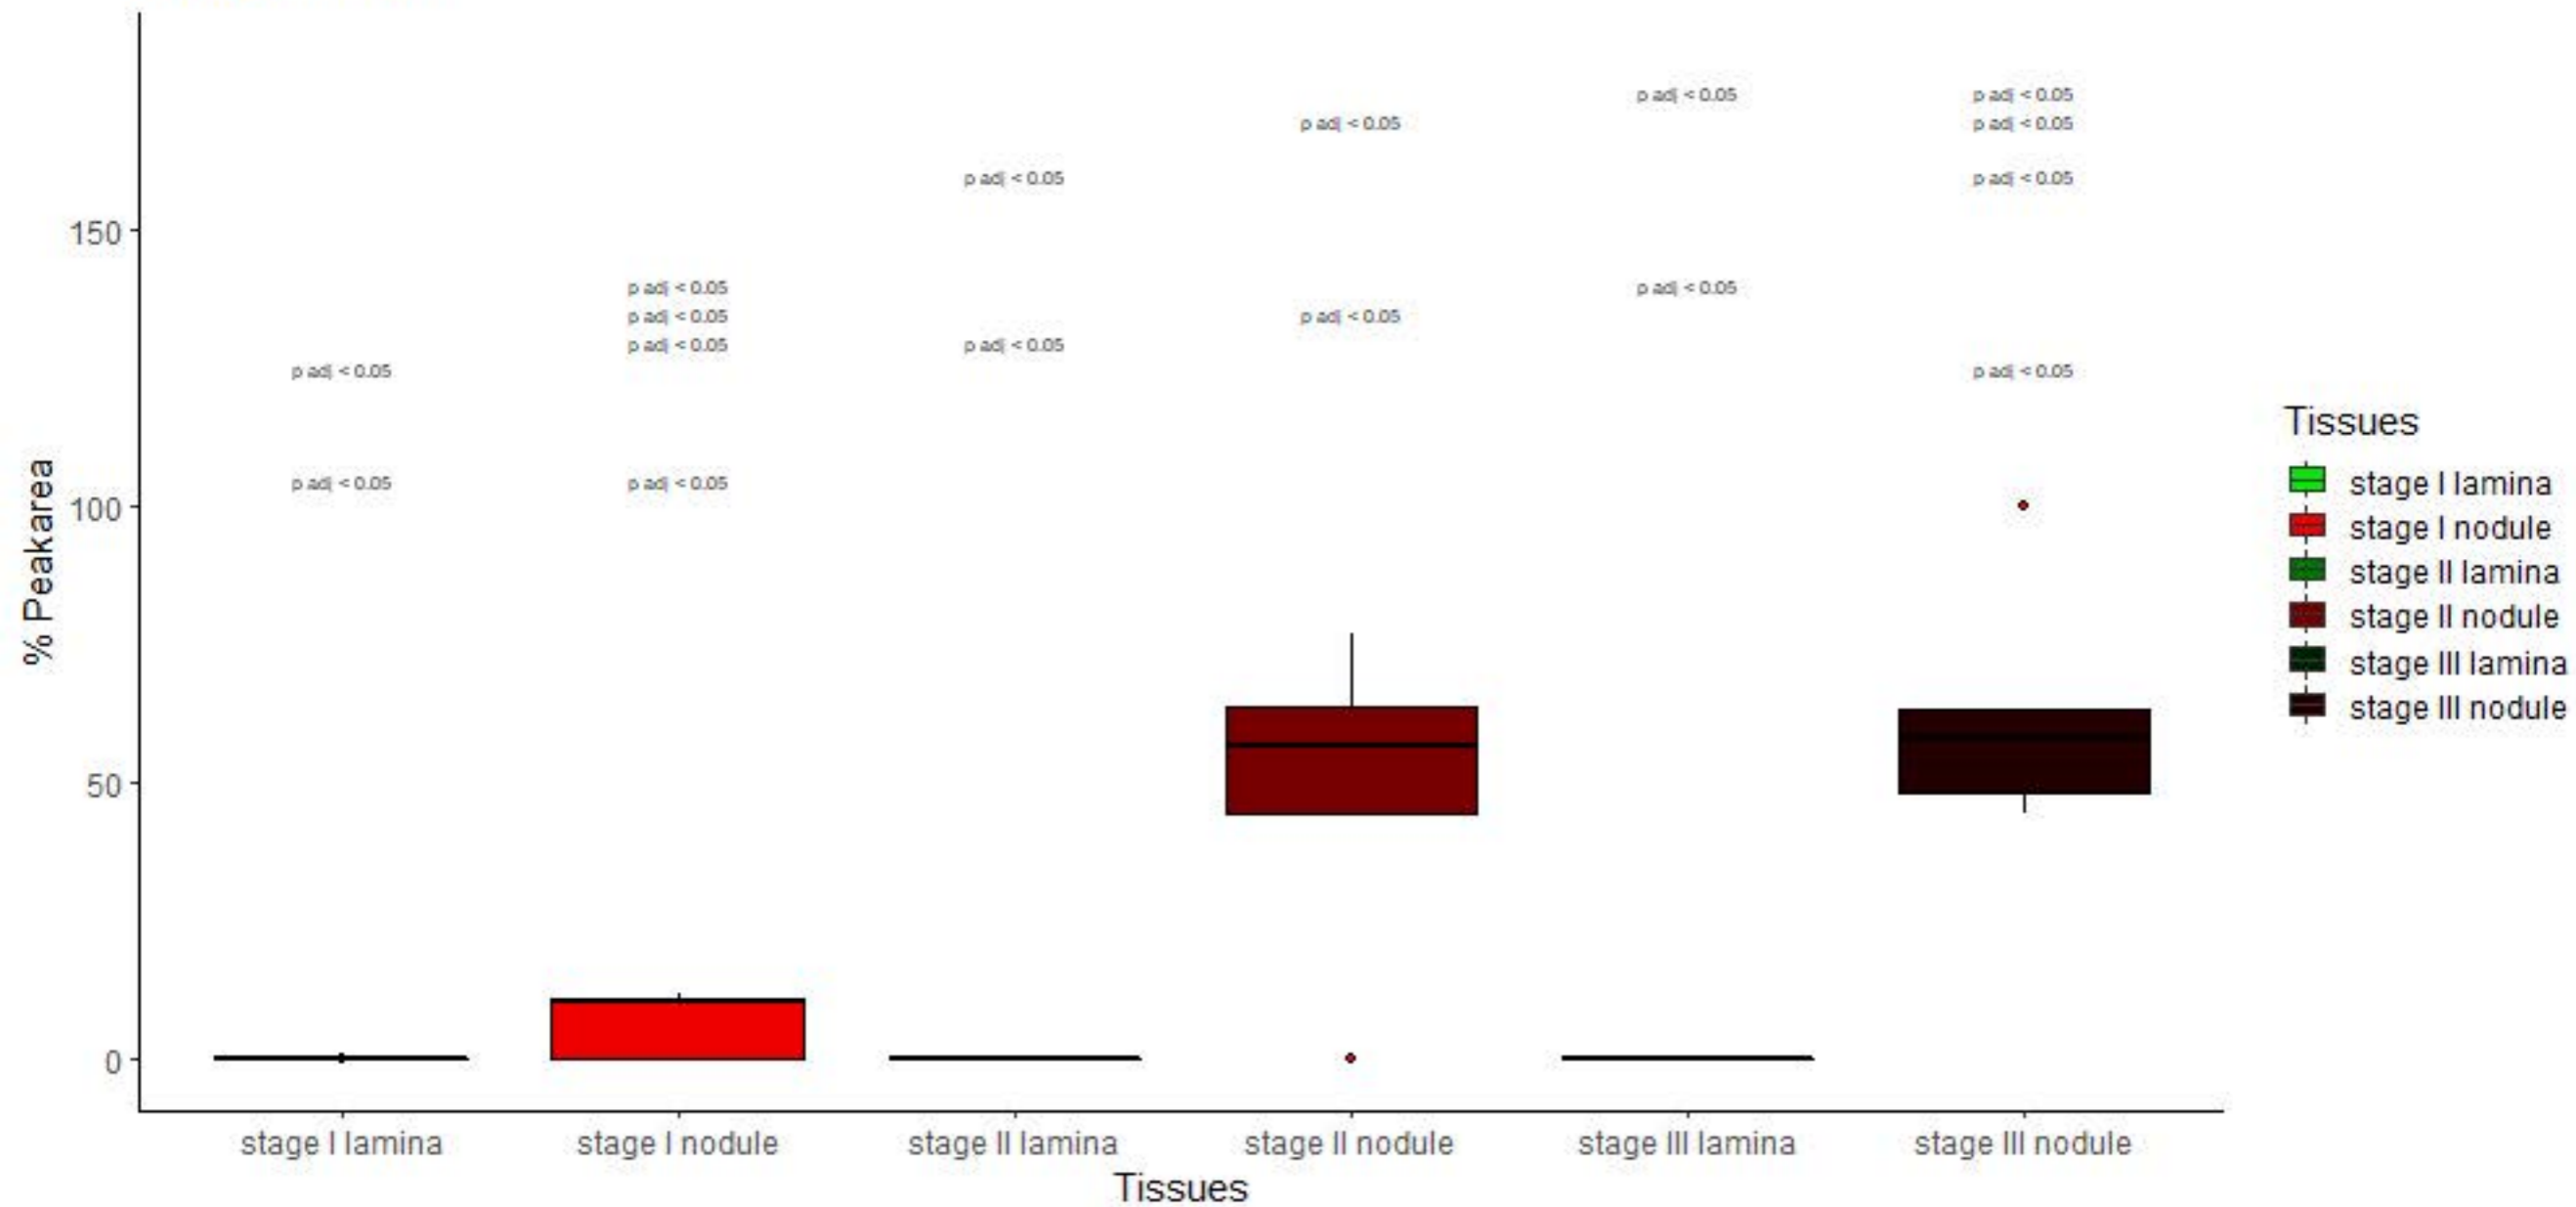

# NA Kaempferol/Luteolin

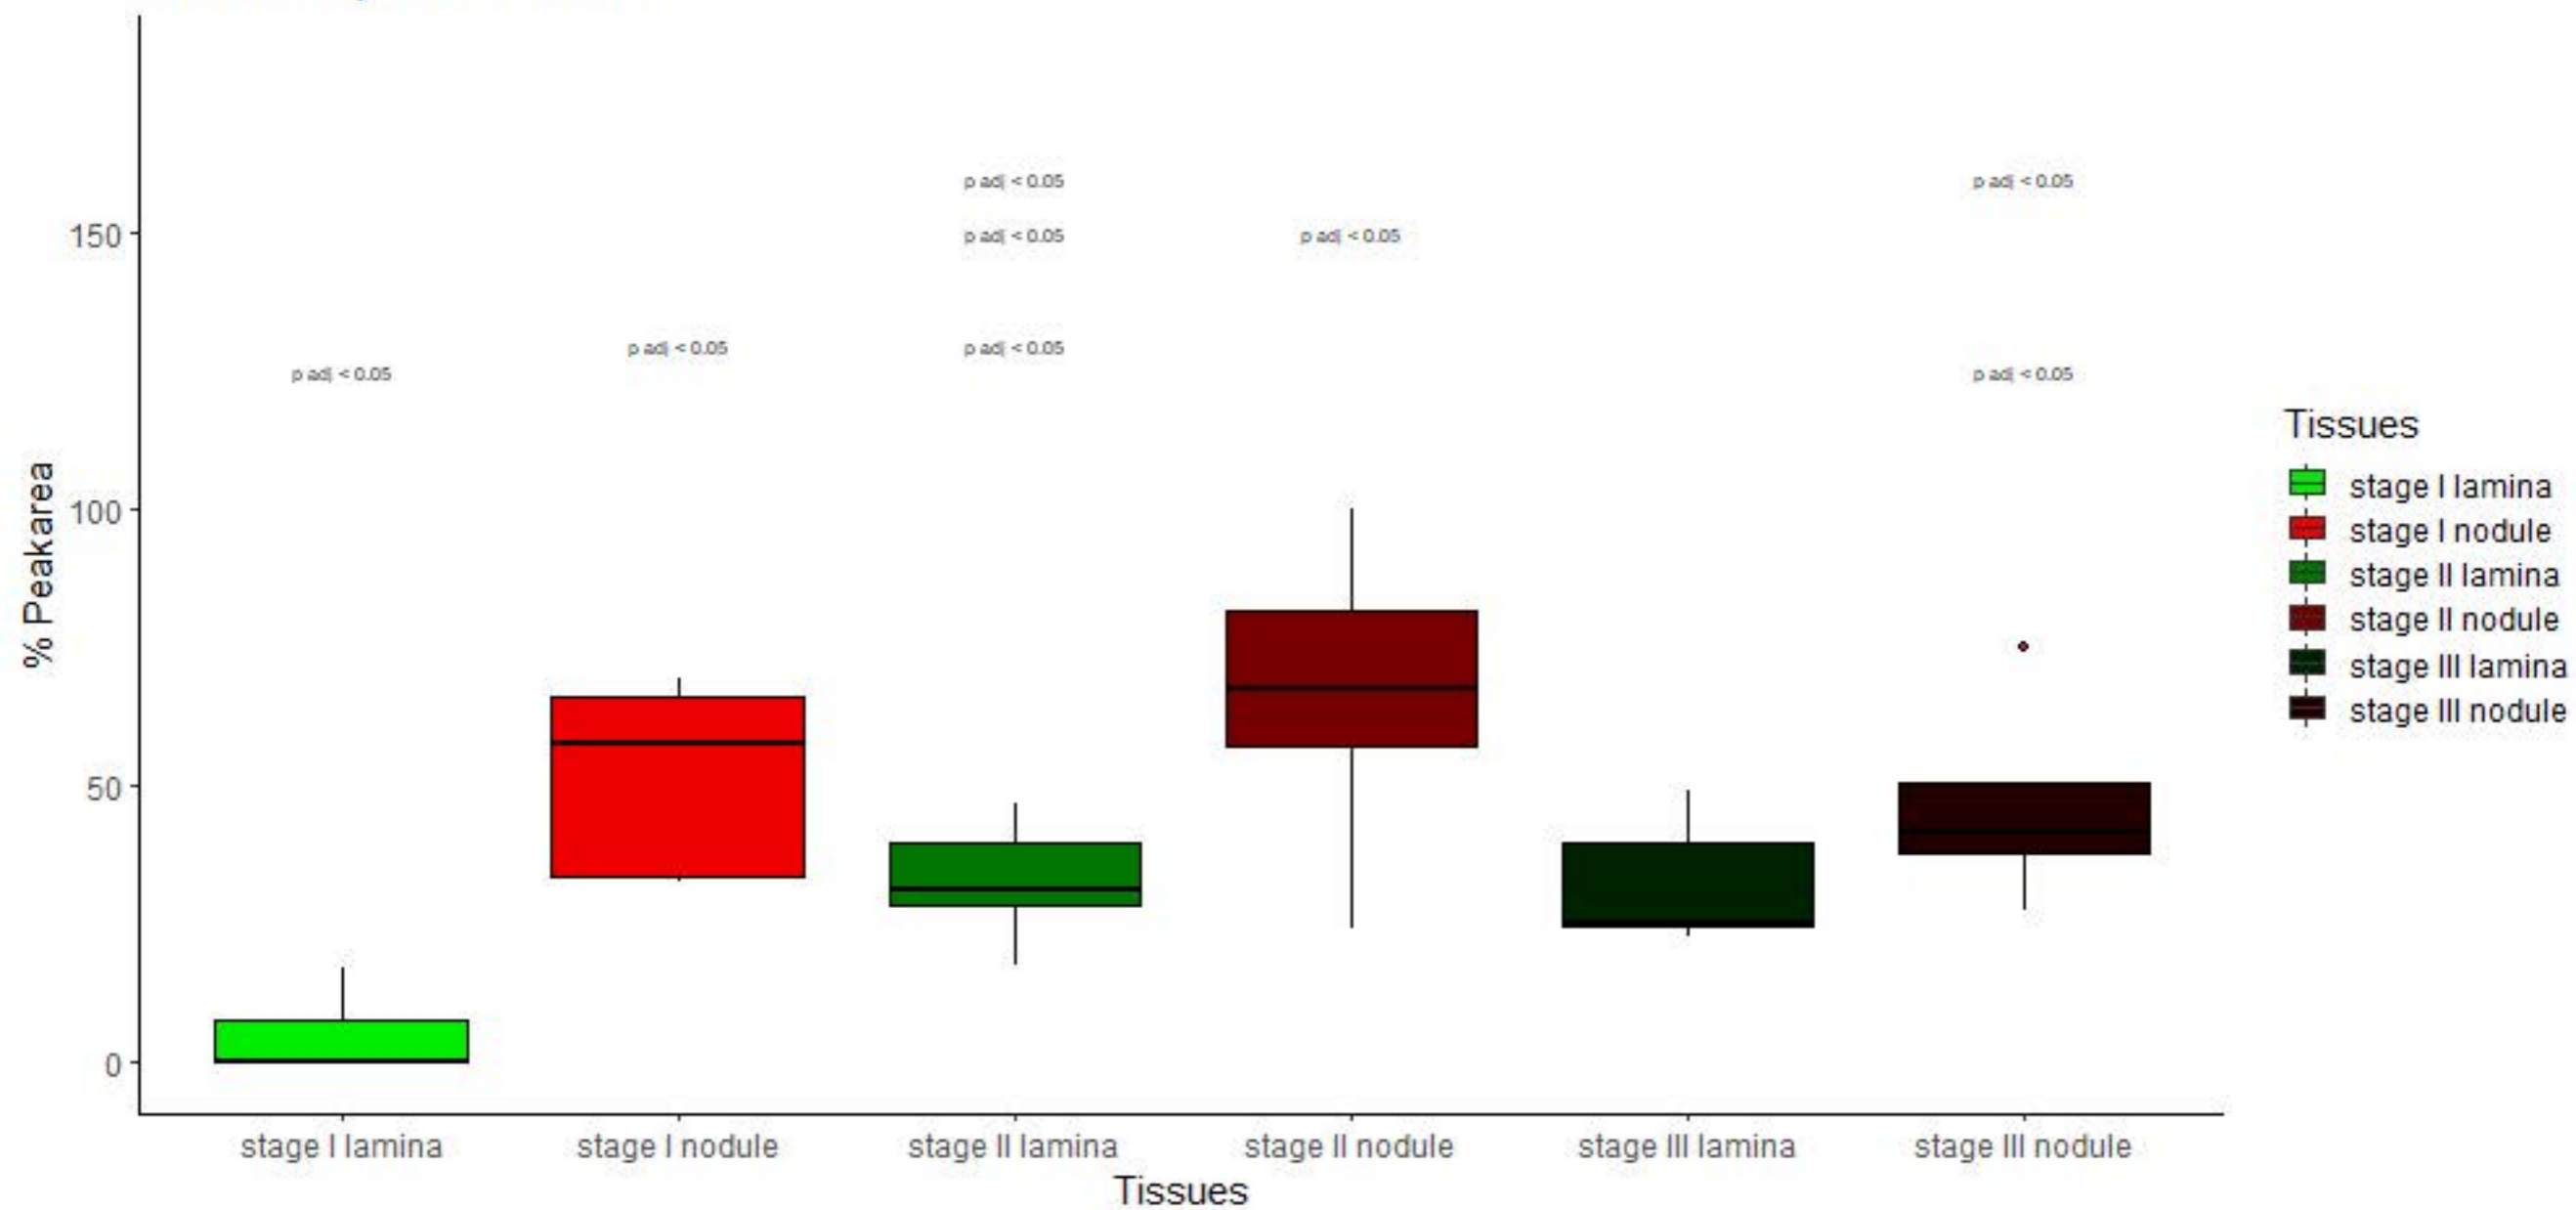

NA 100

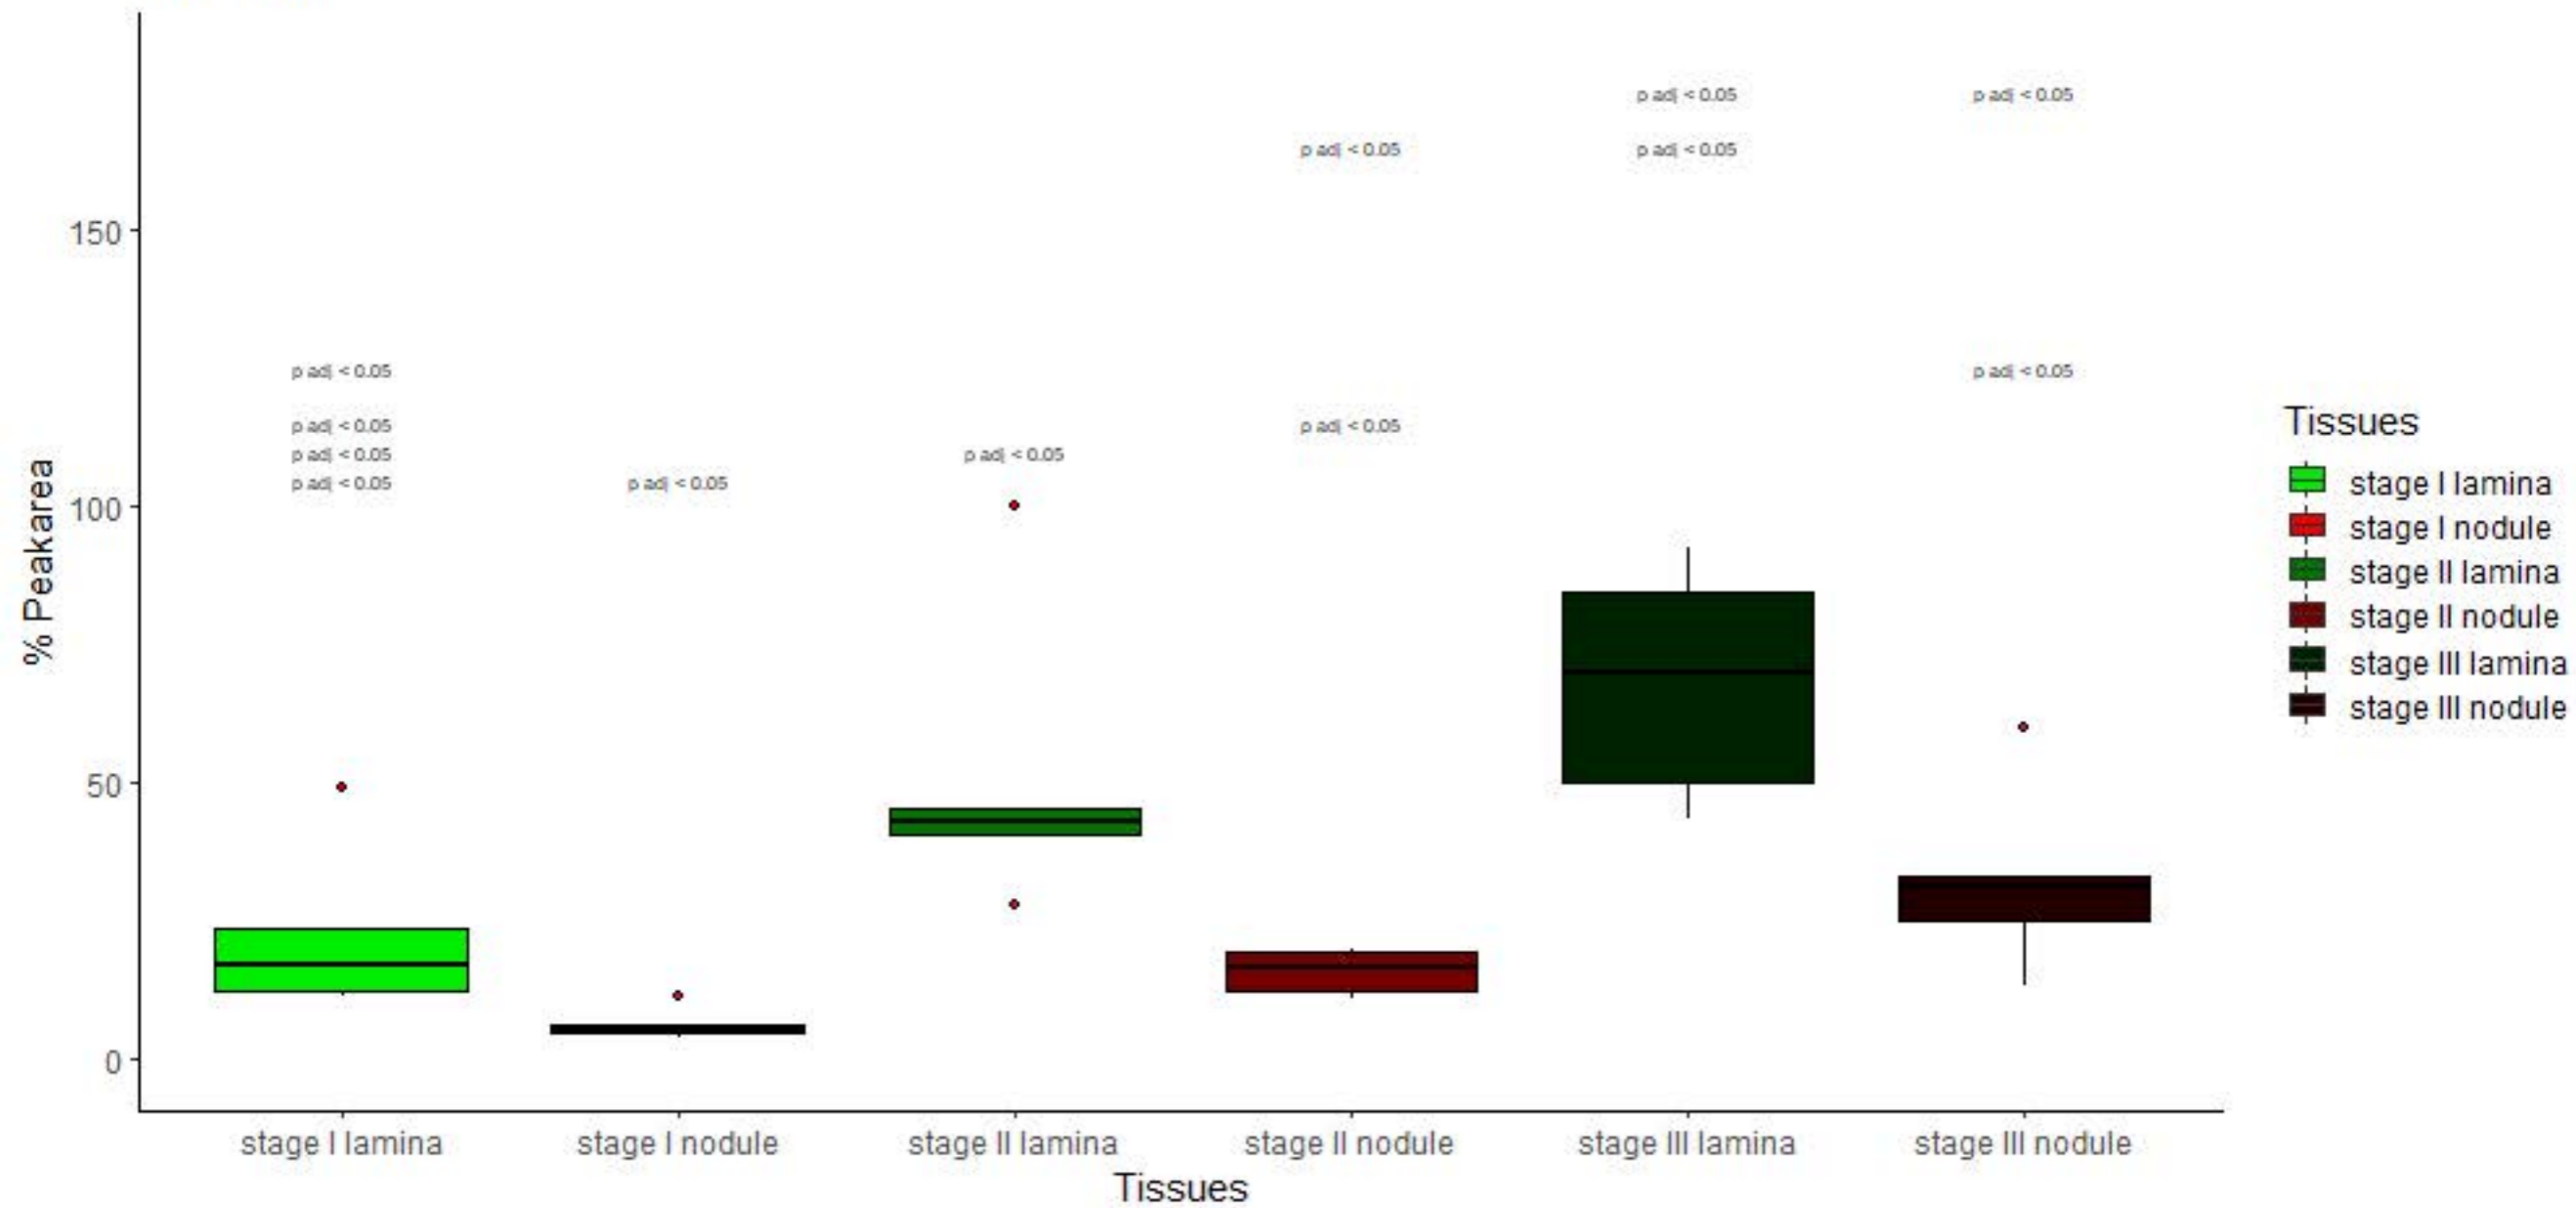

NA 102

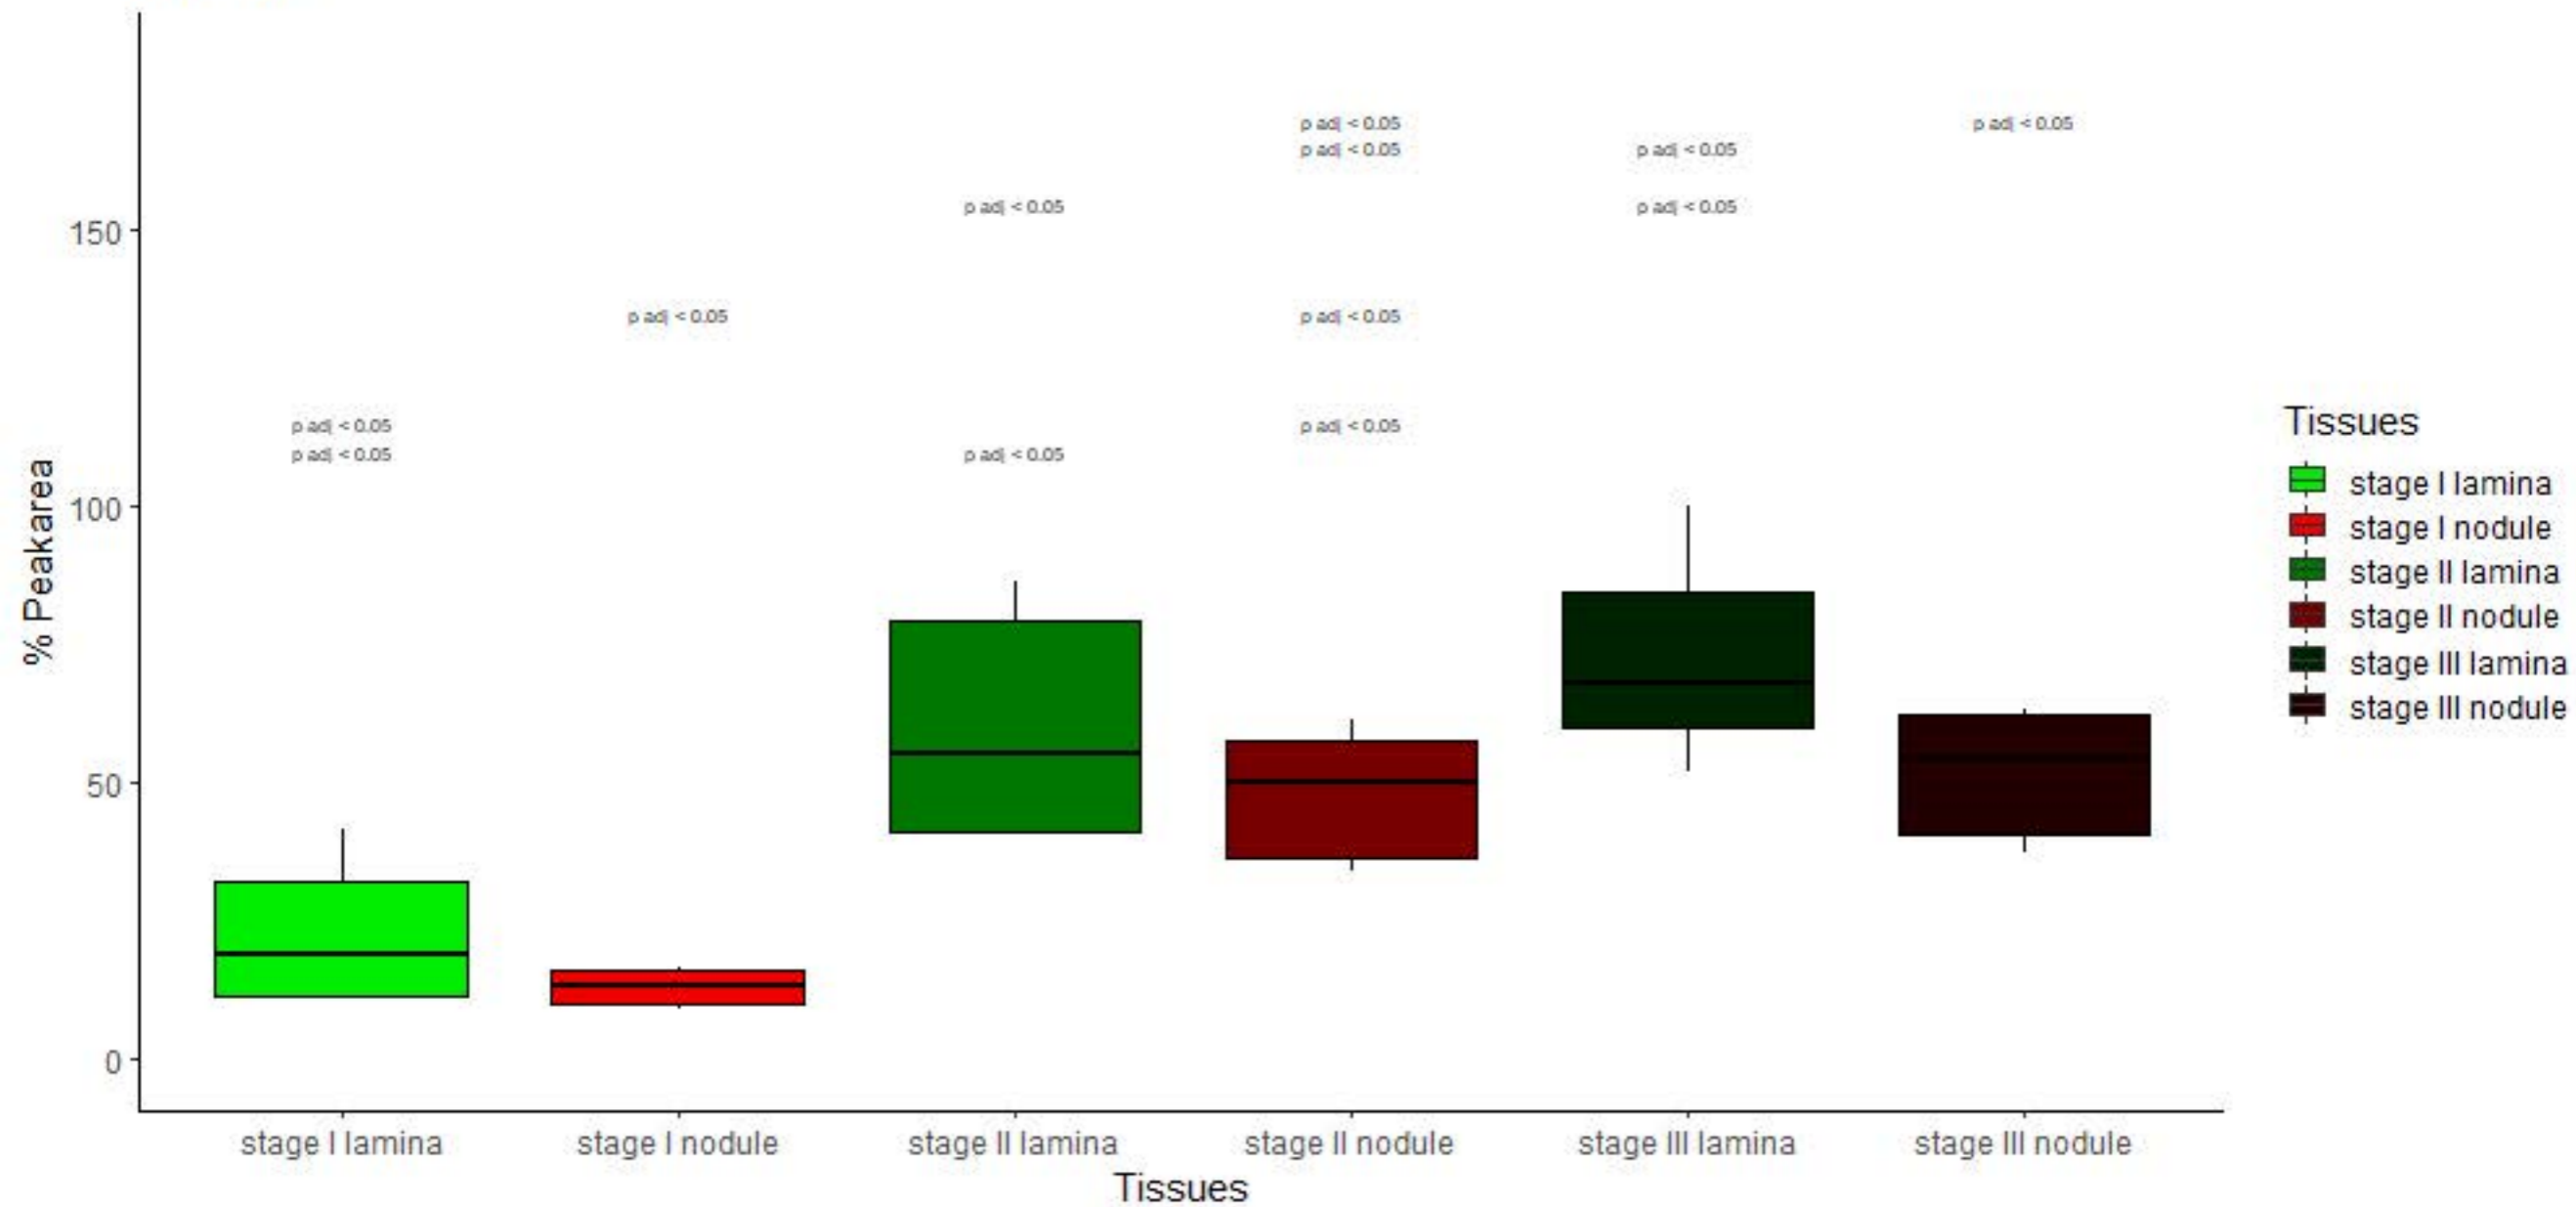



NA 103

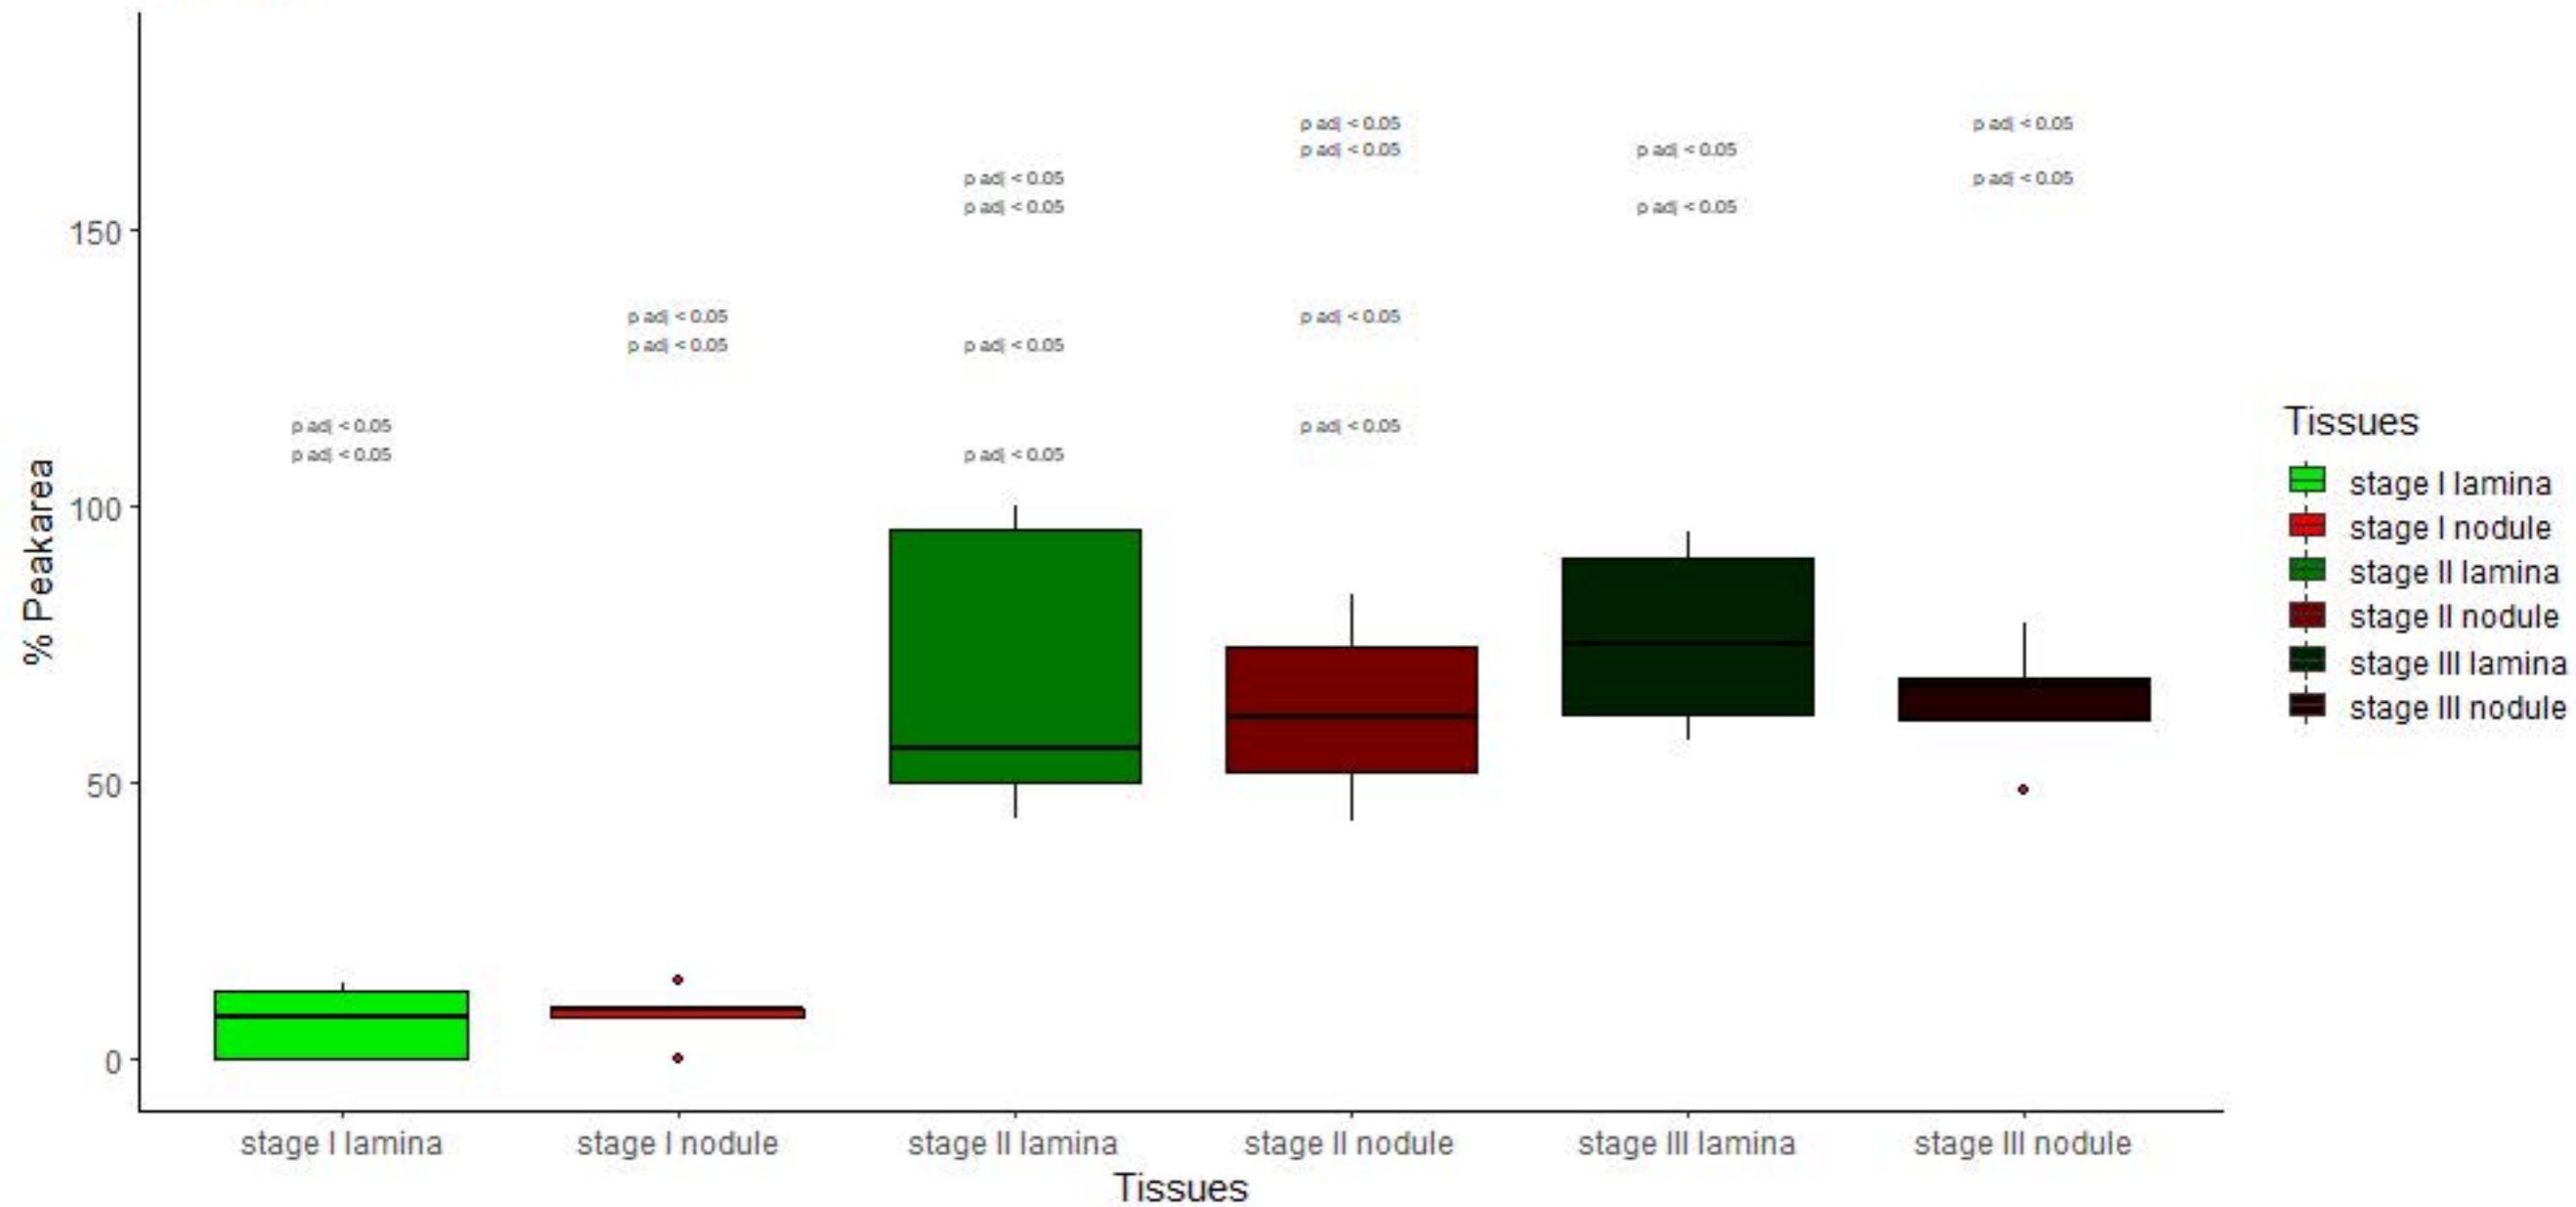

NA 106

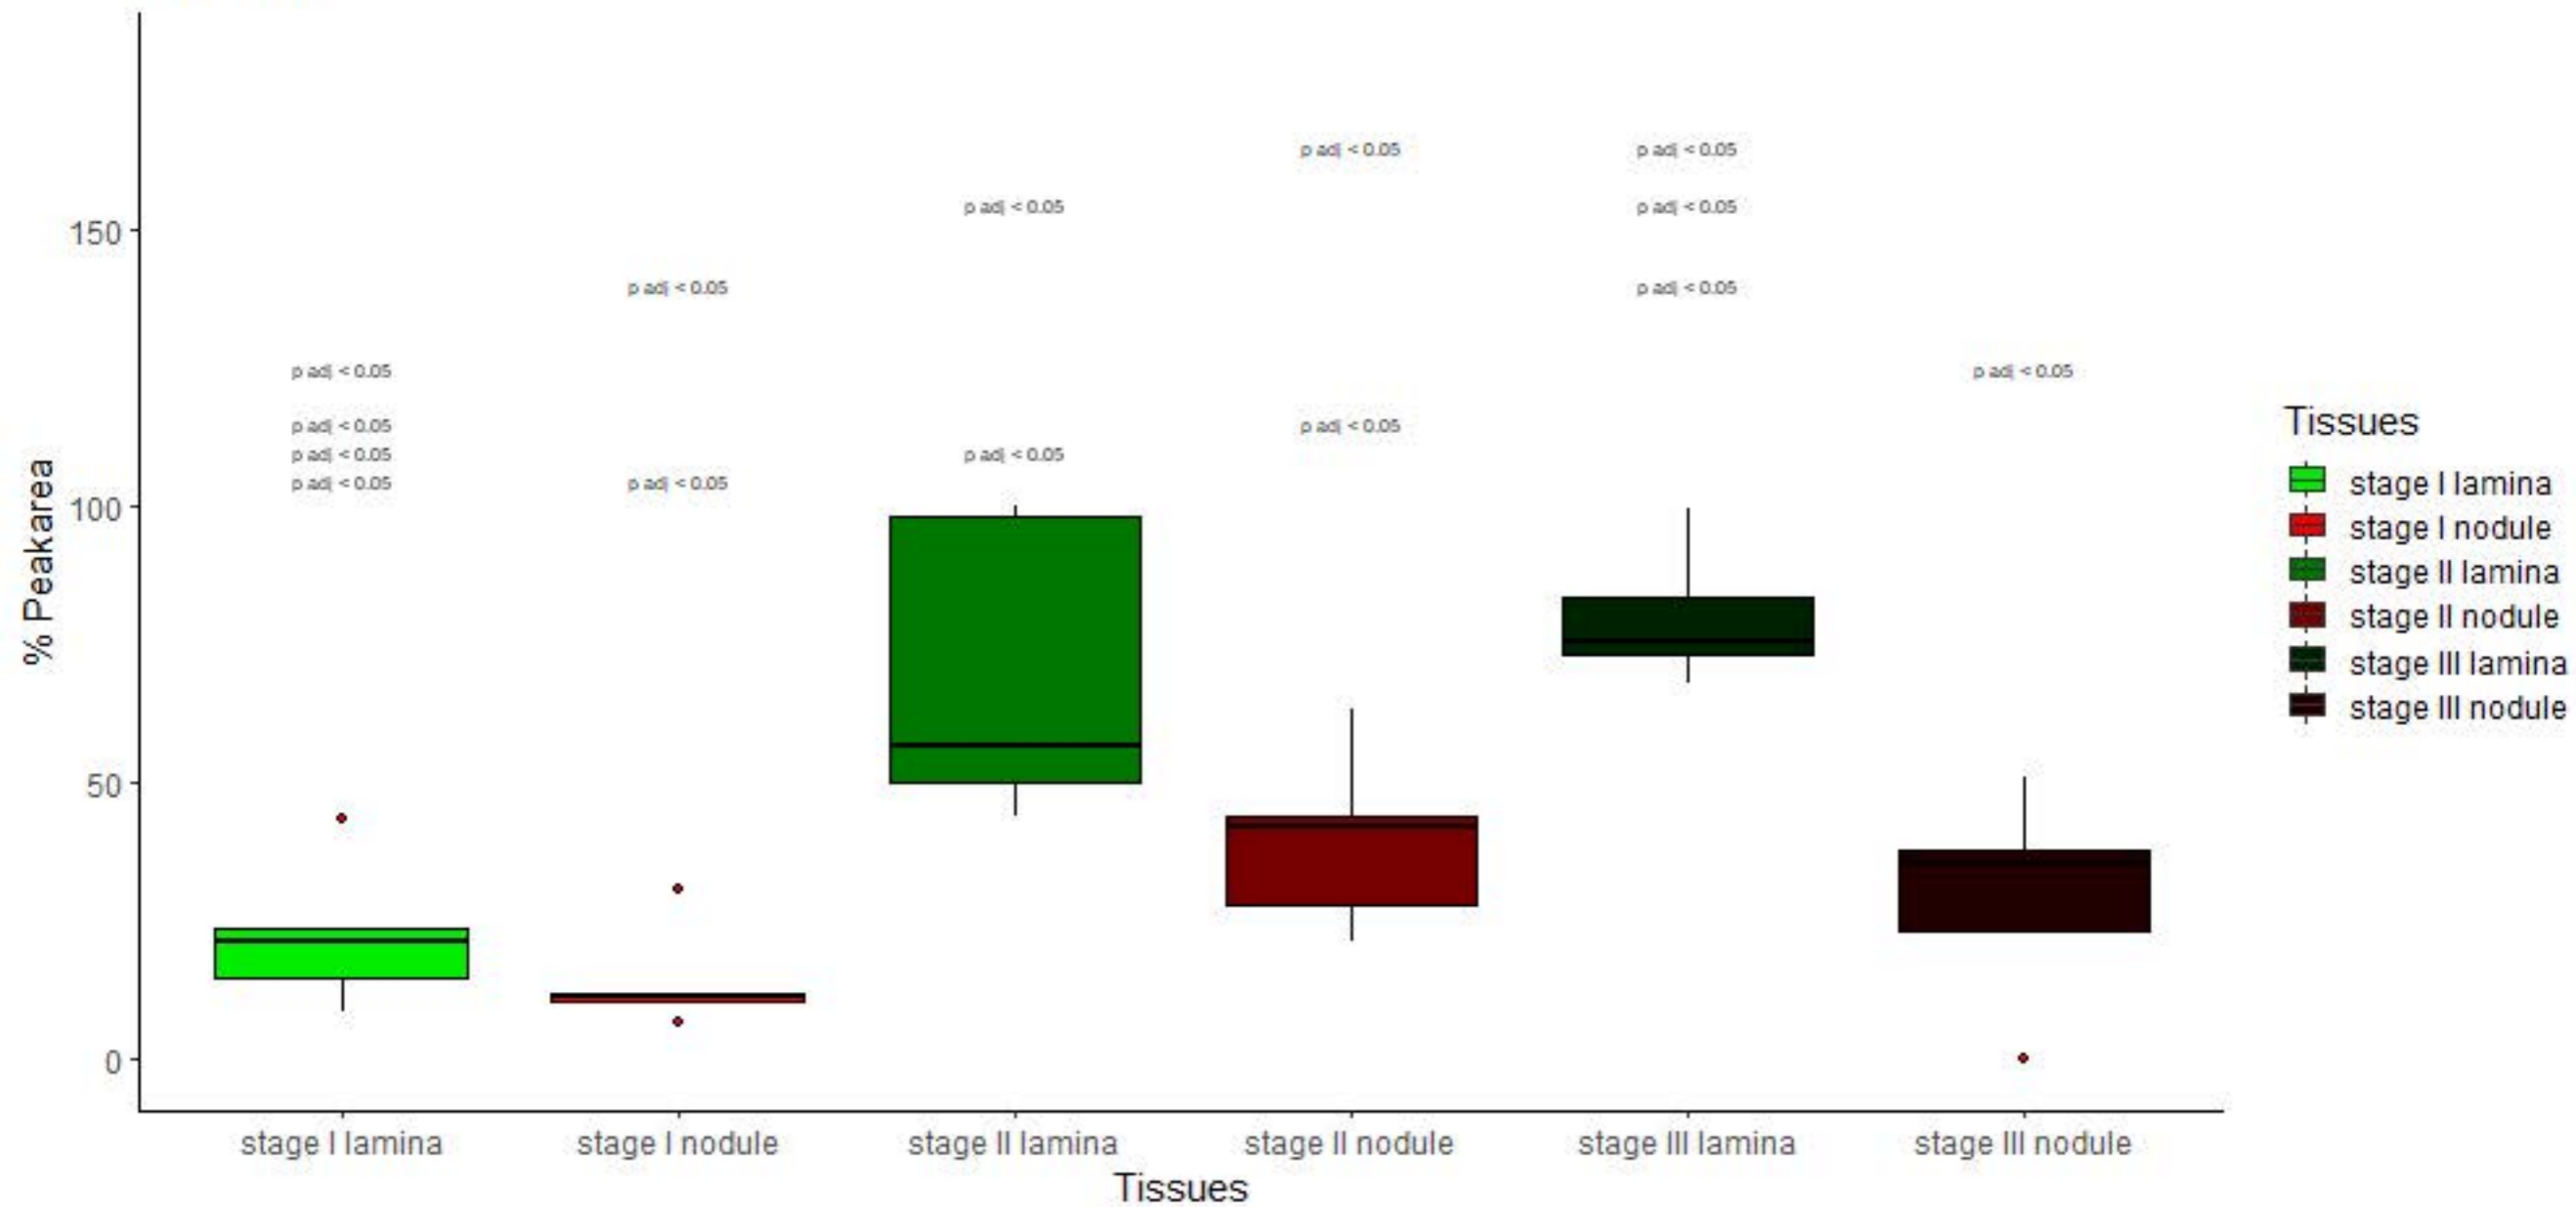

NA 112

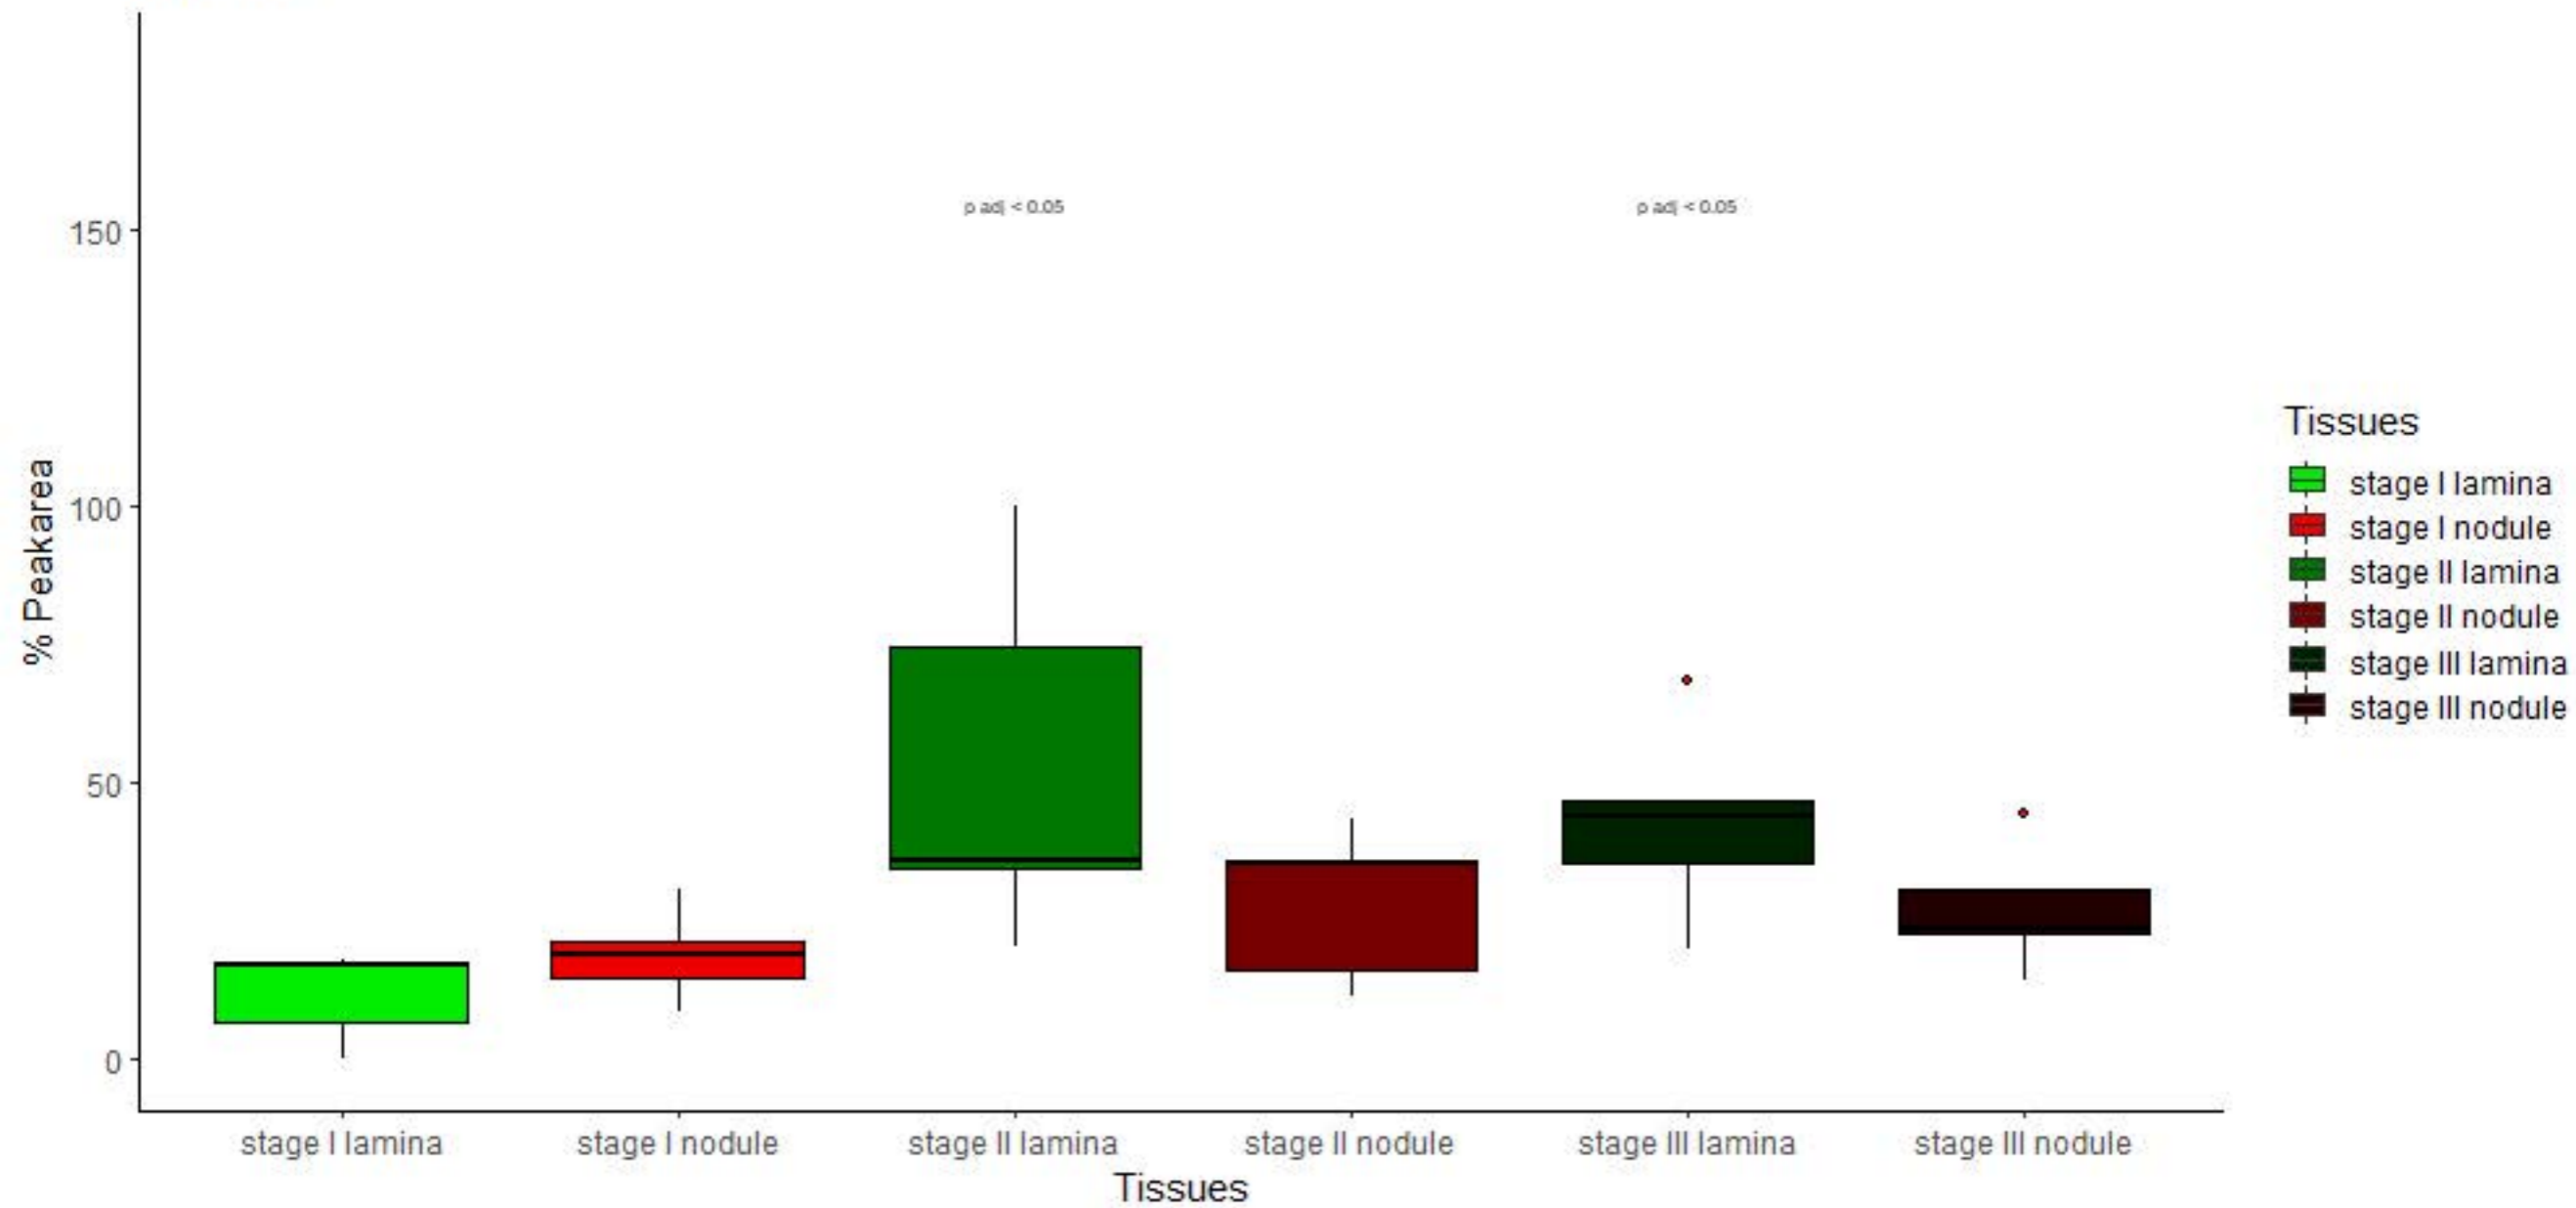

NA 113

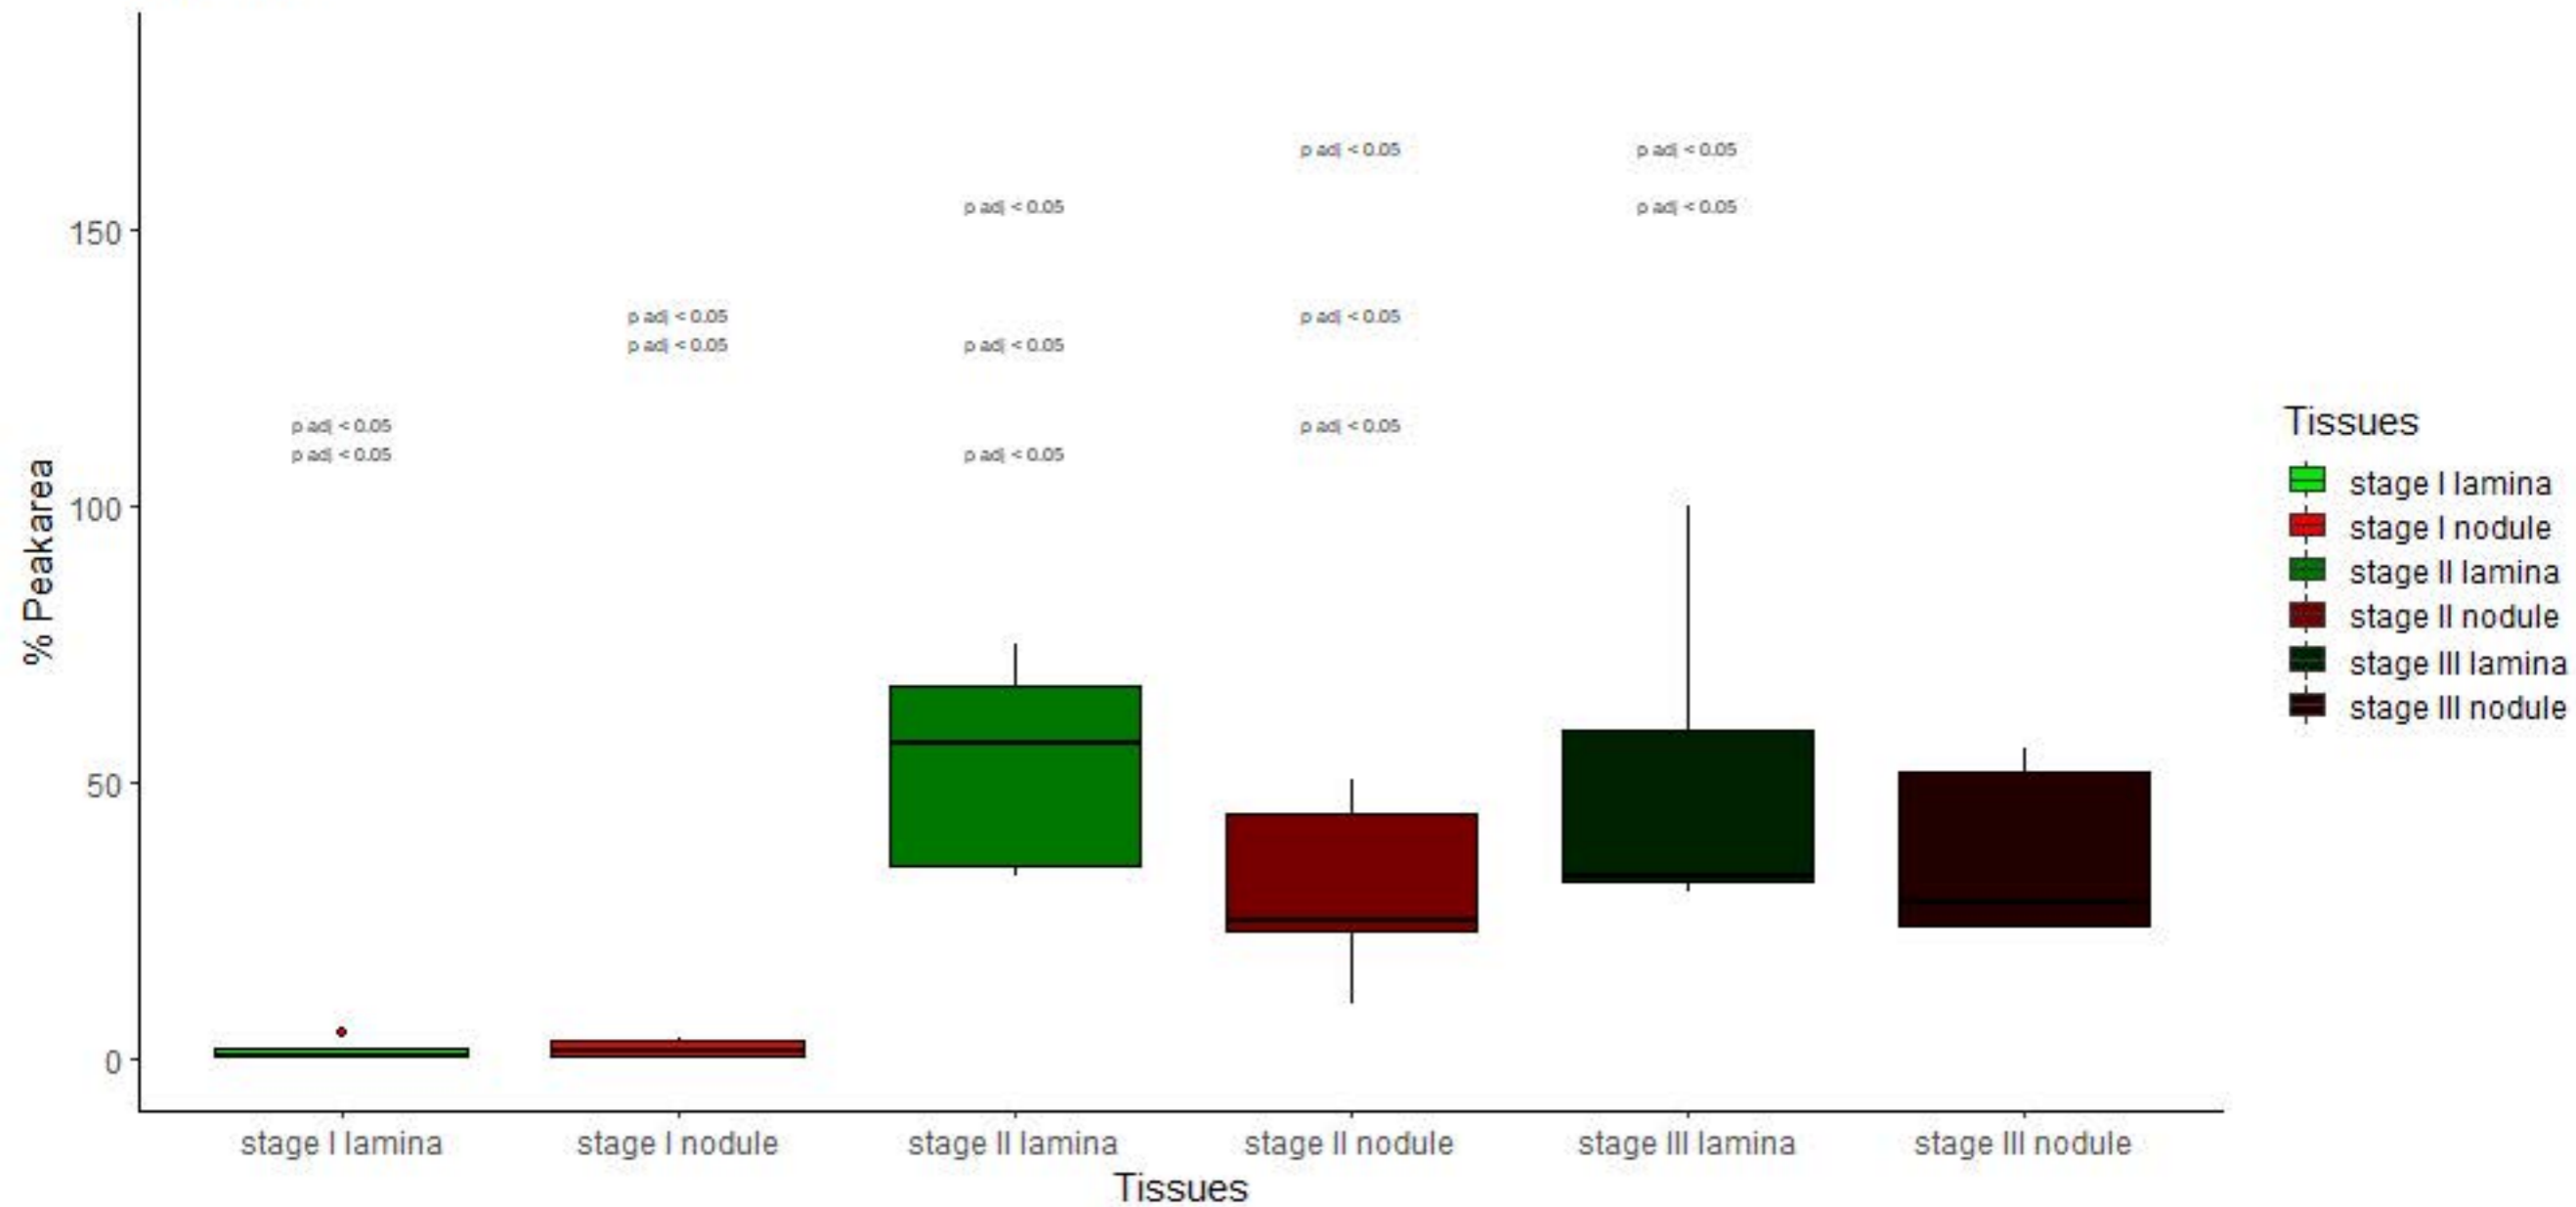

NA 115

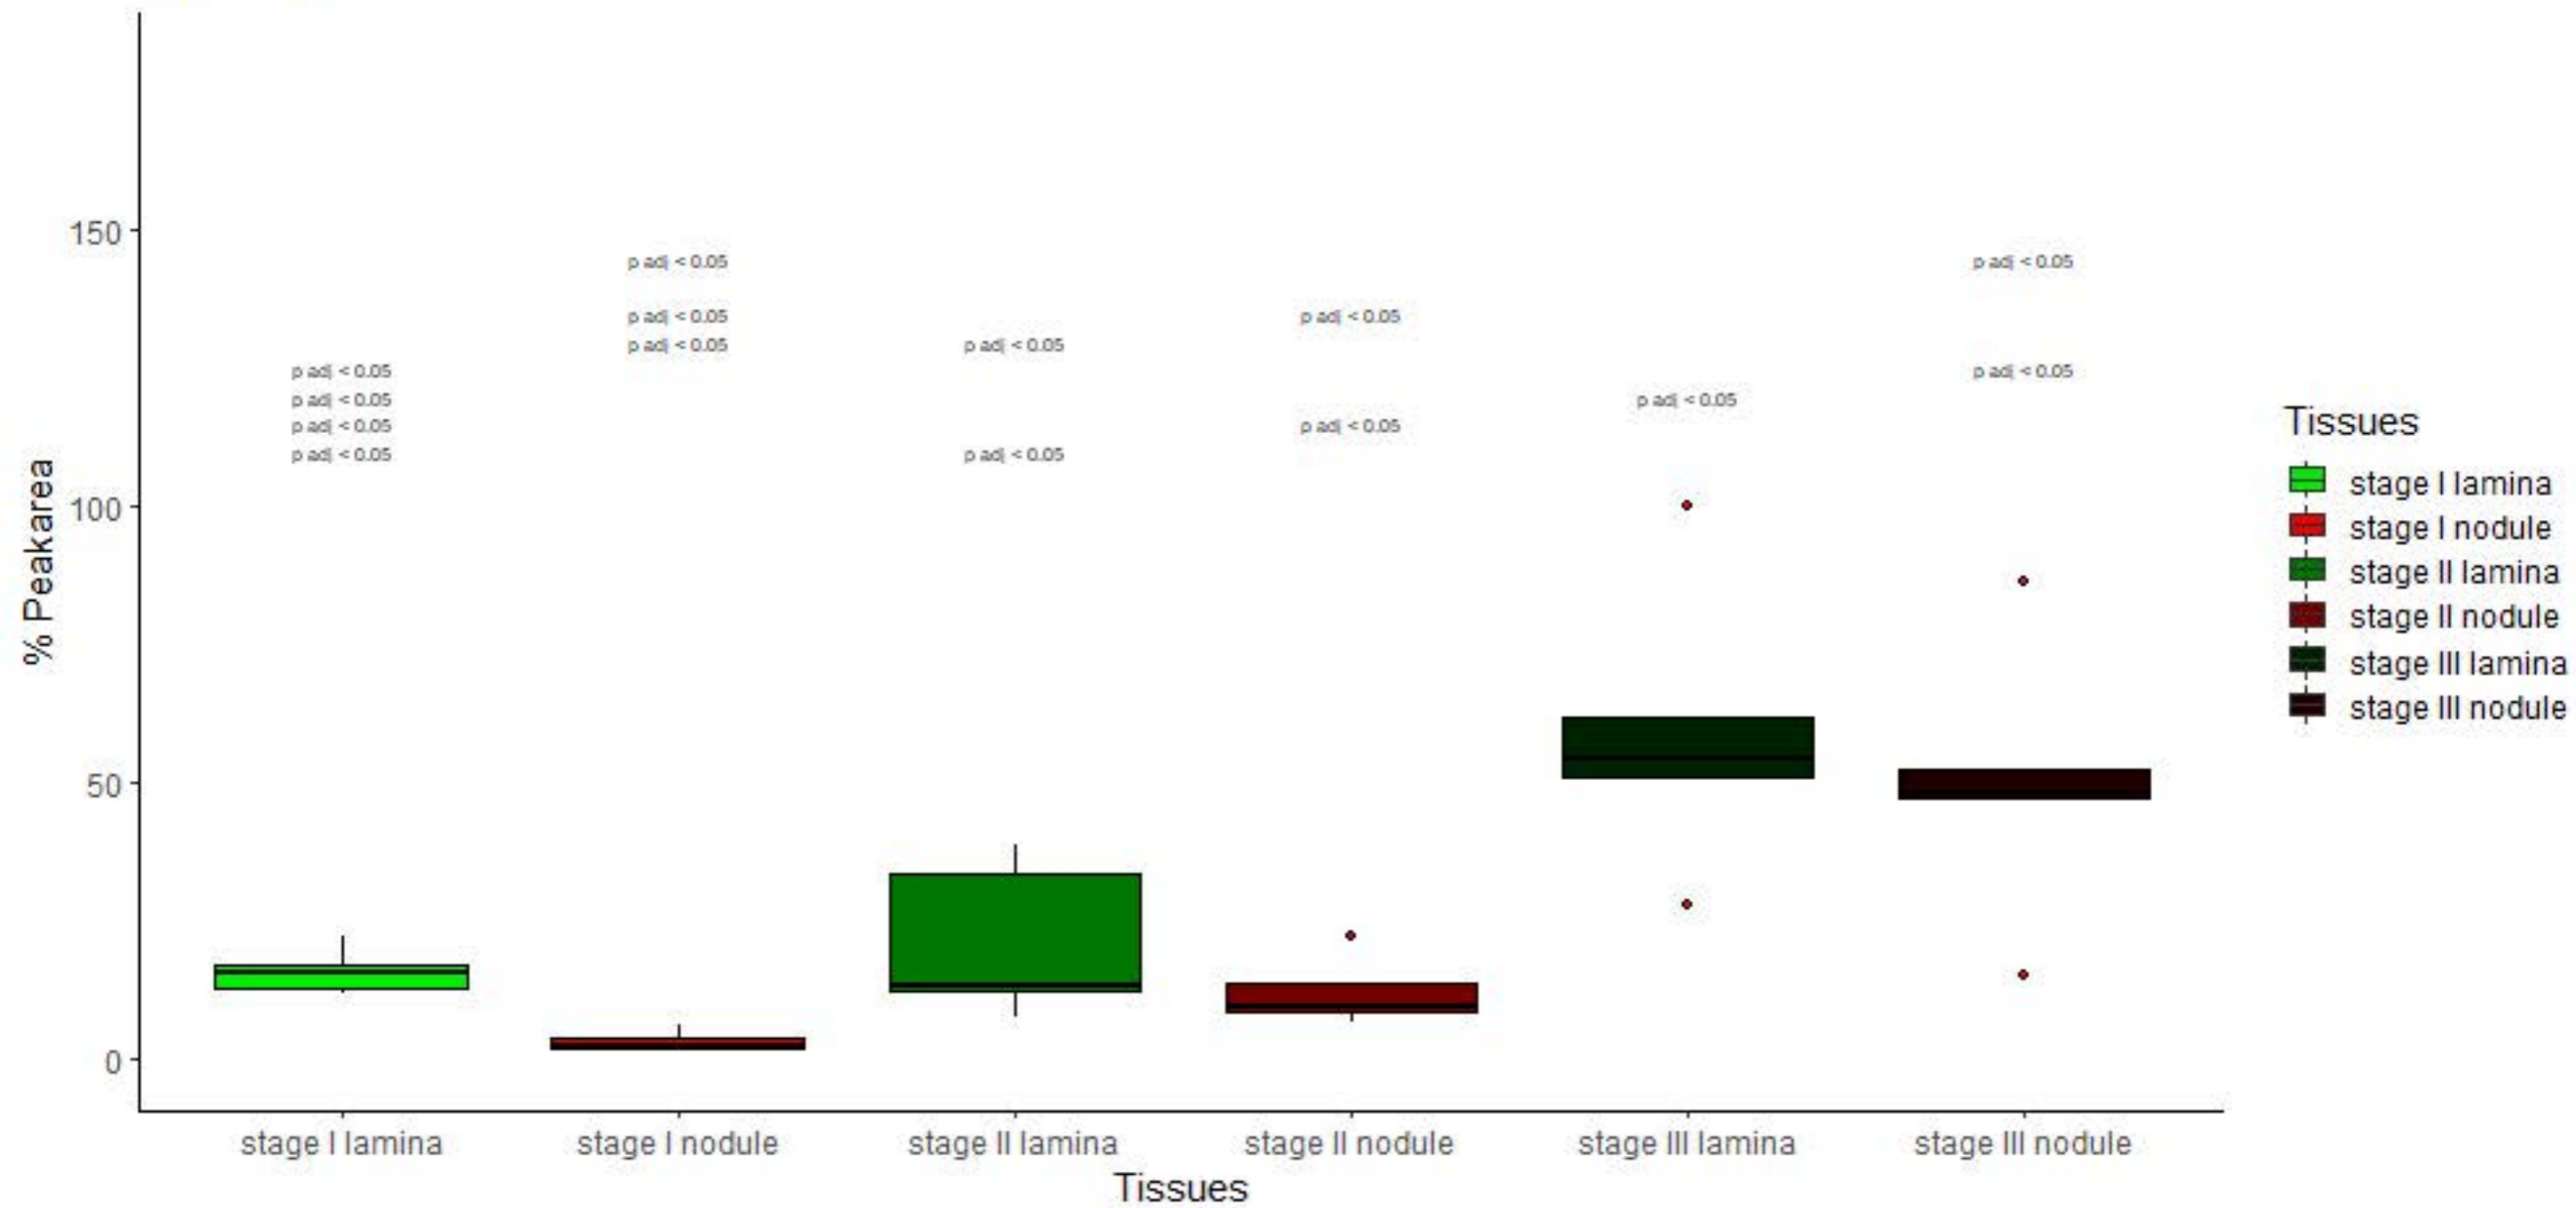

NA 116

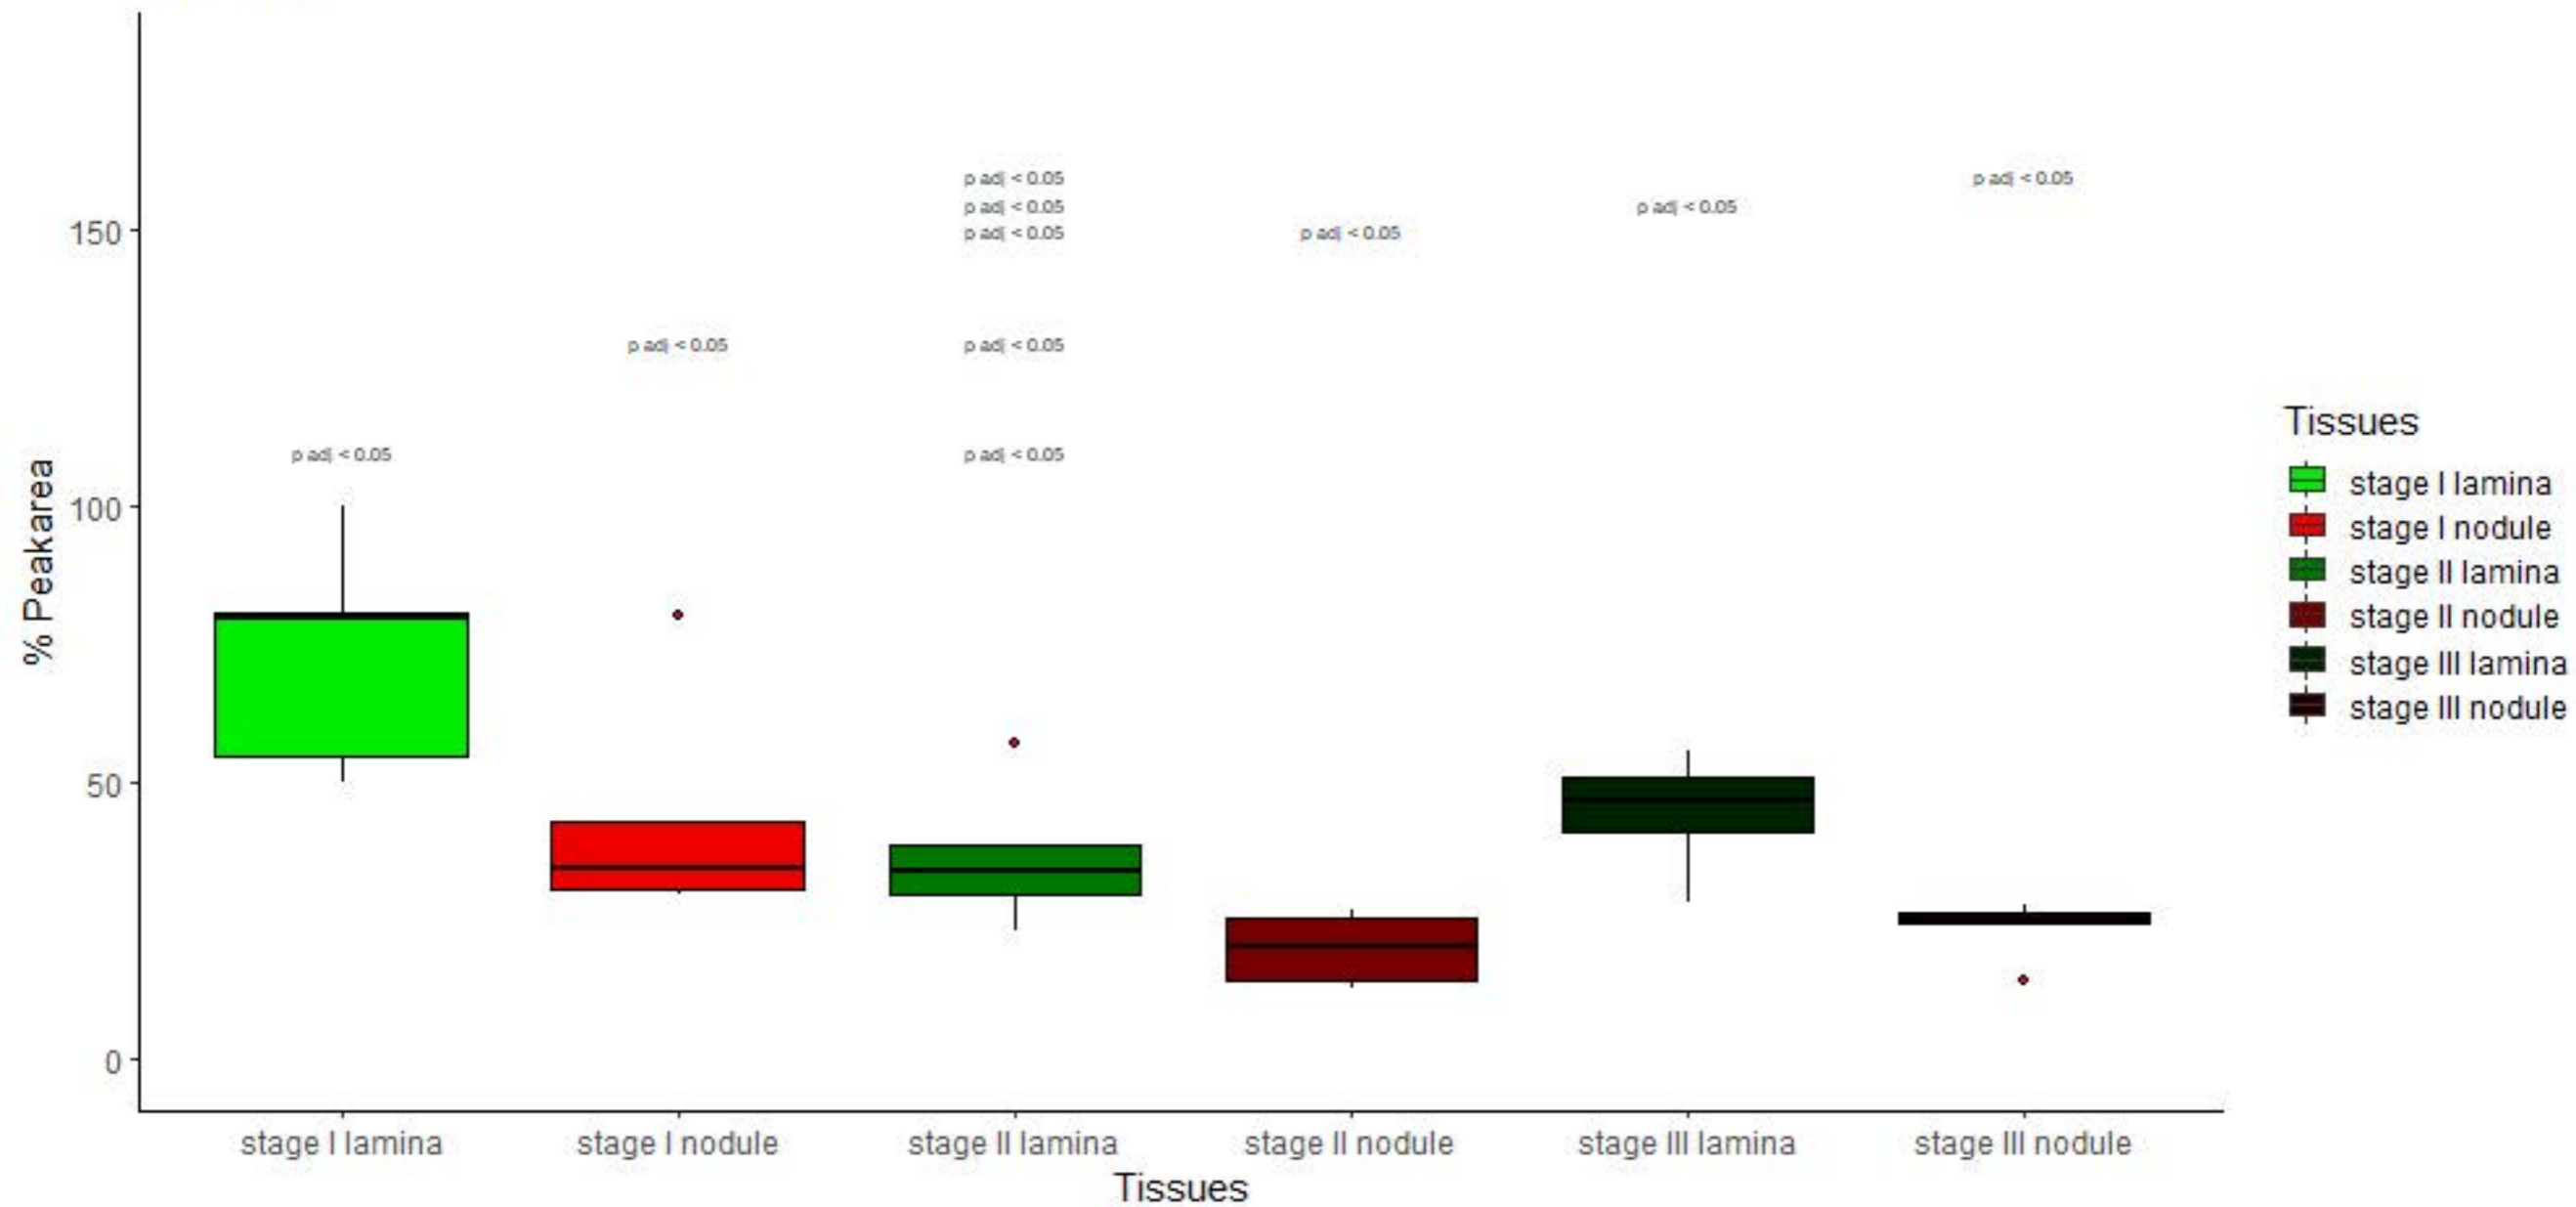

NA 117

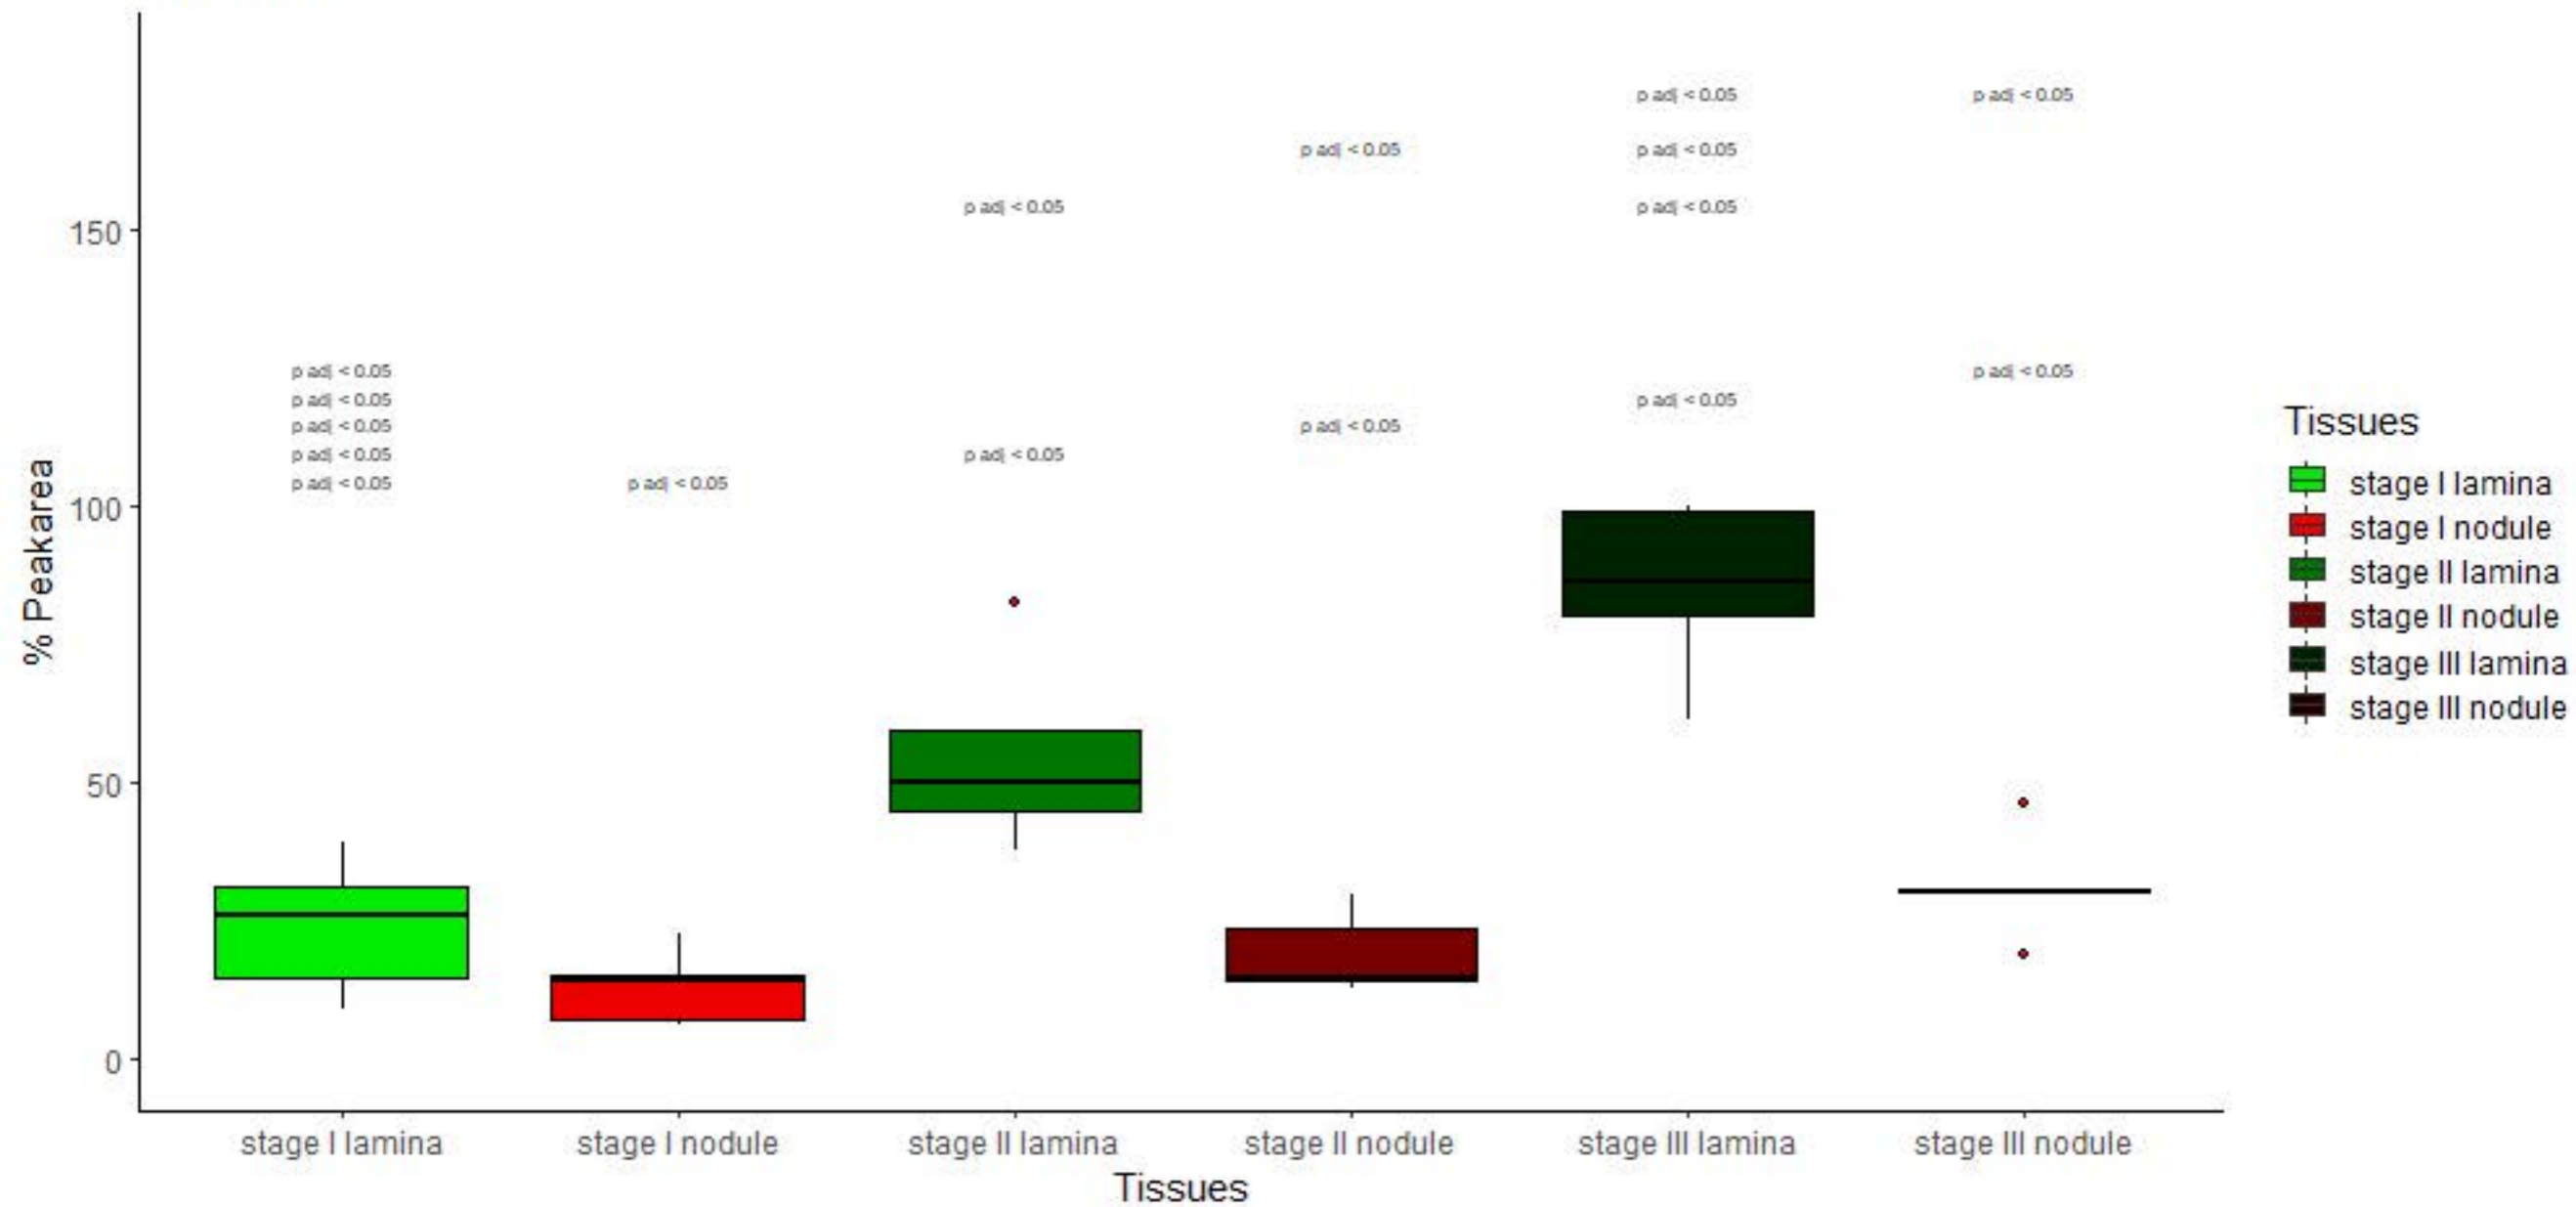

NA 118

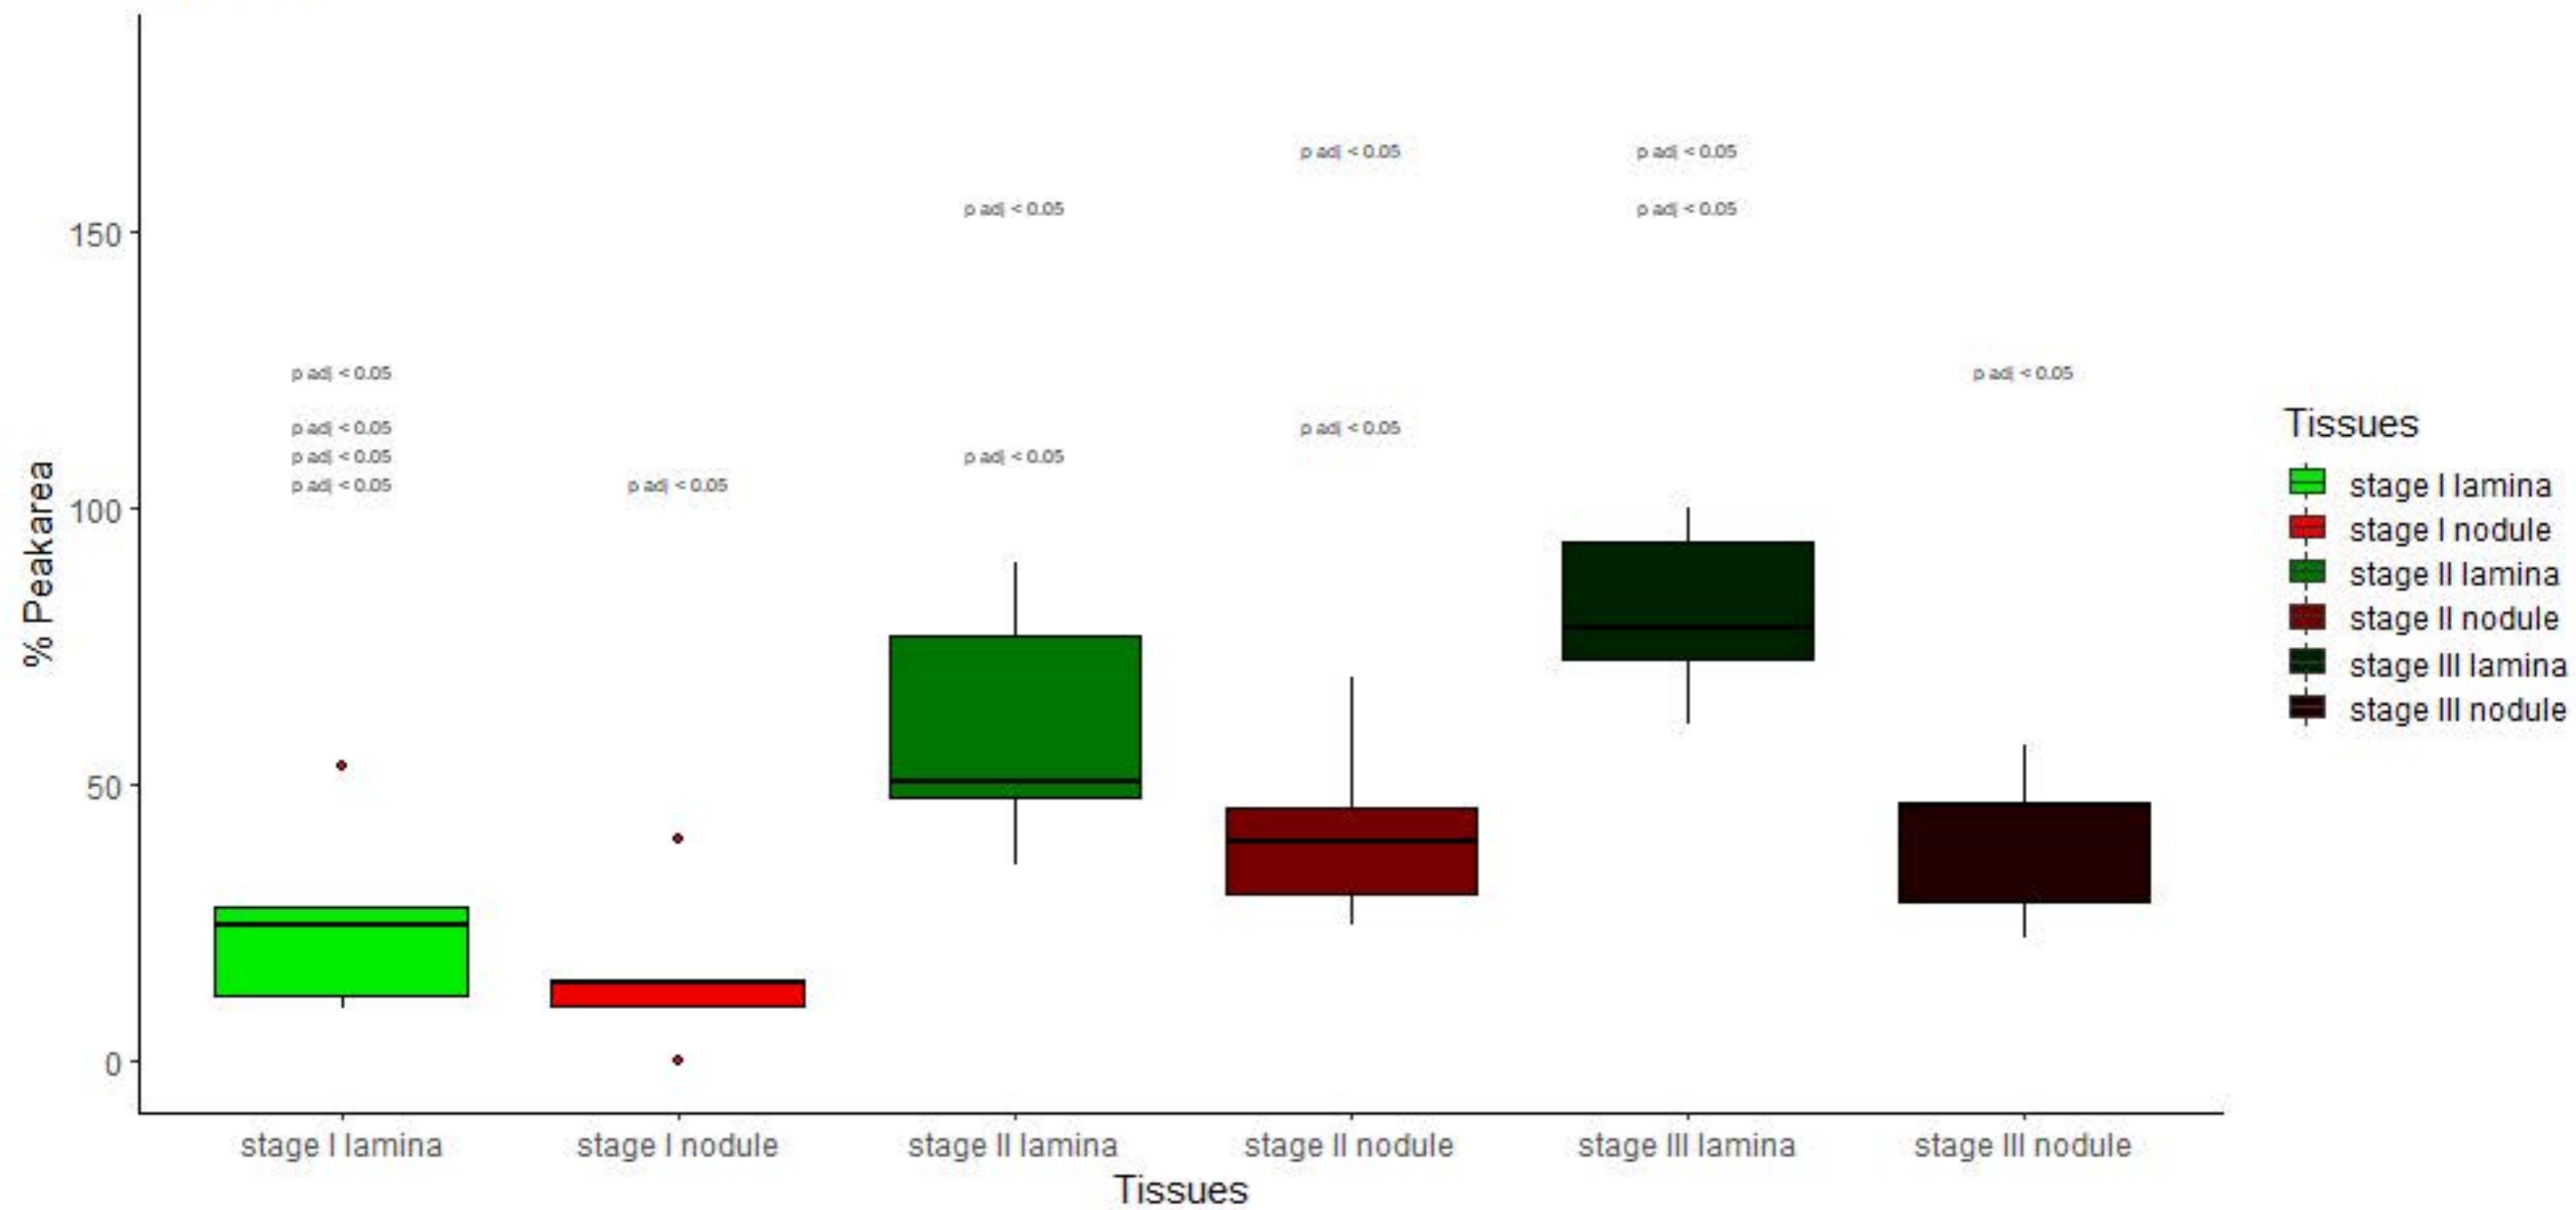



NA 119

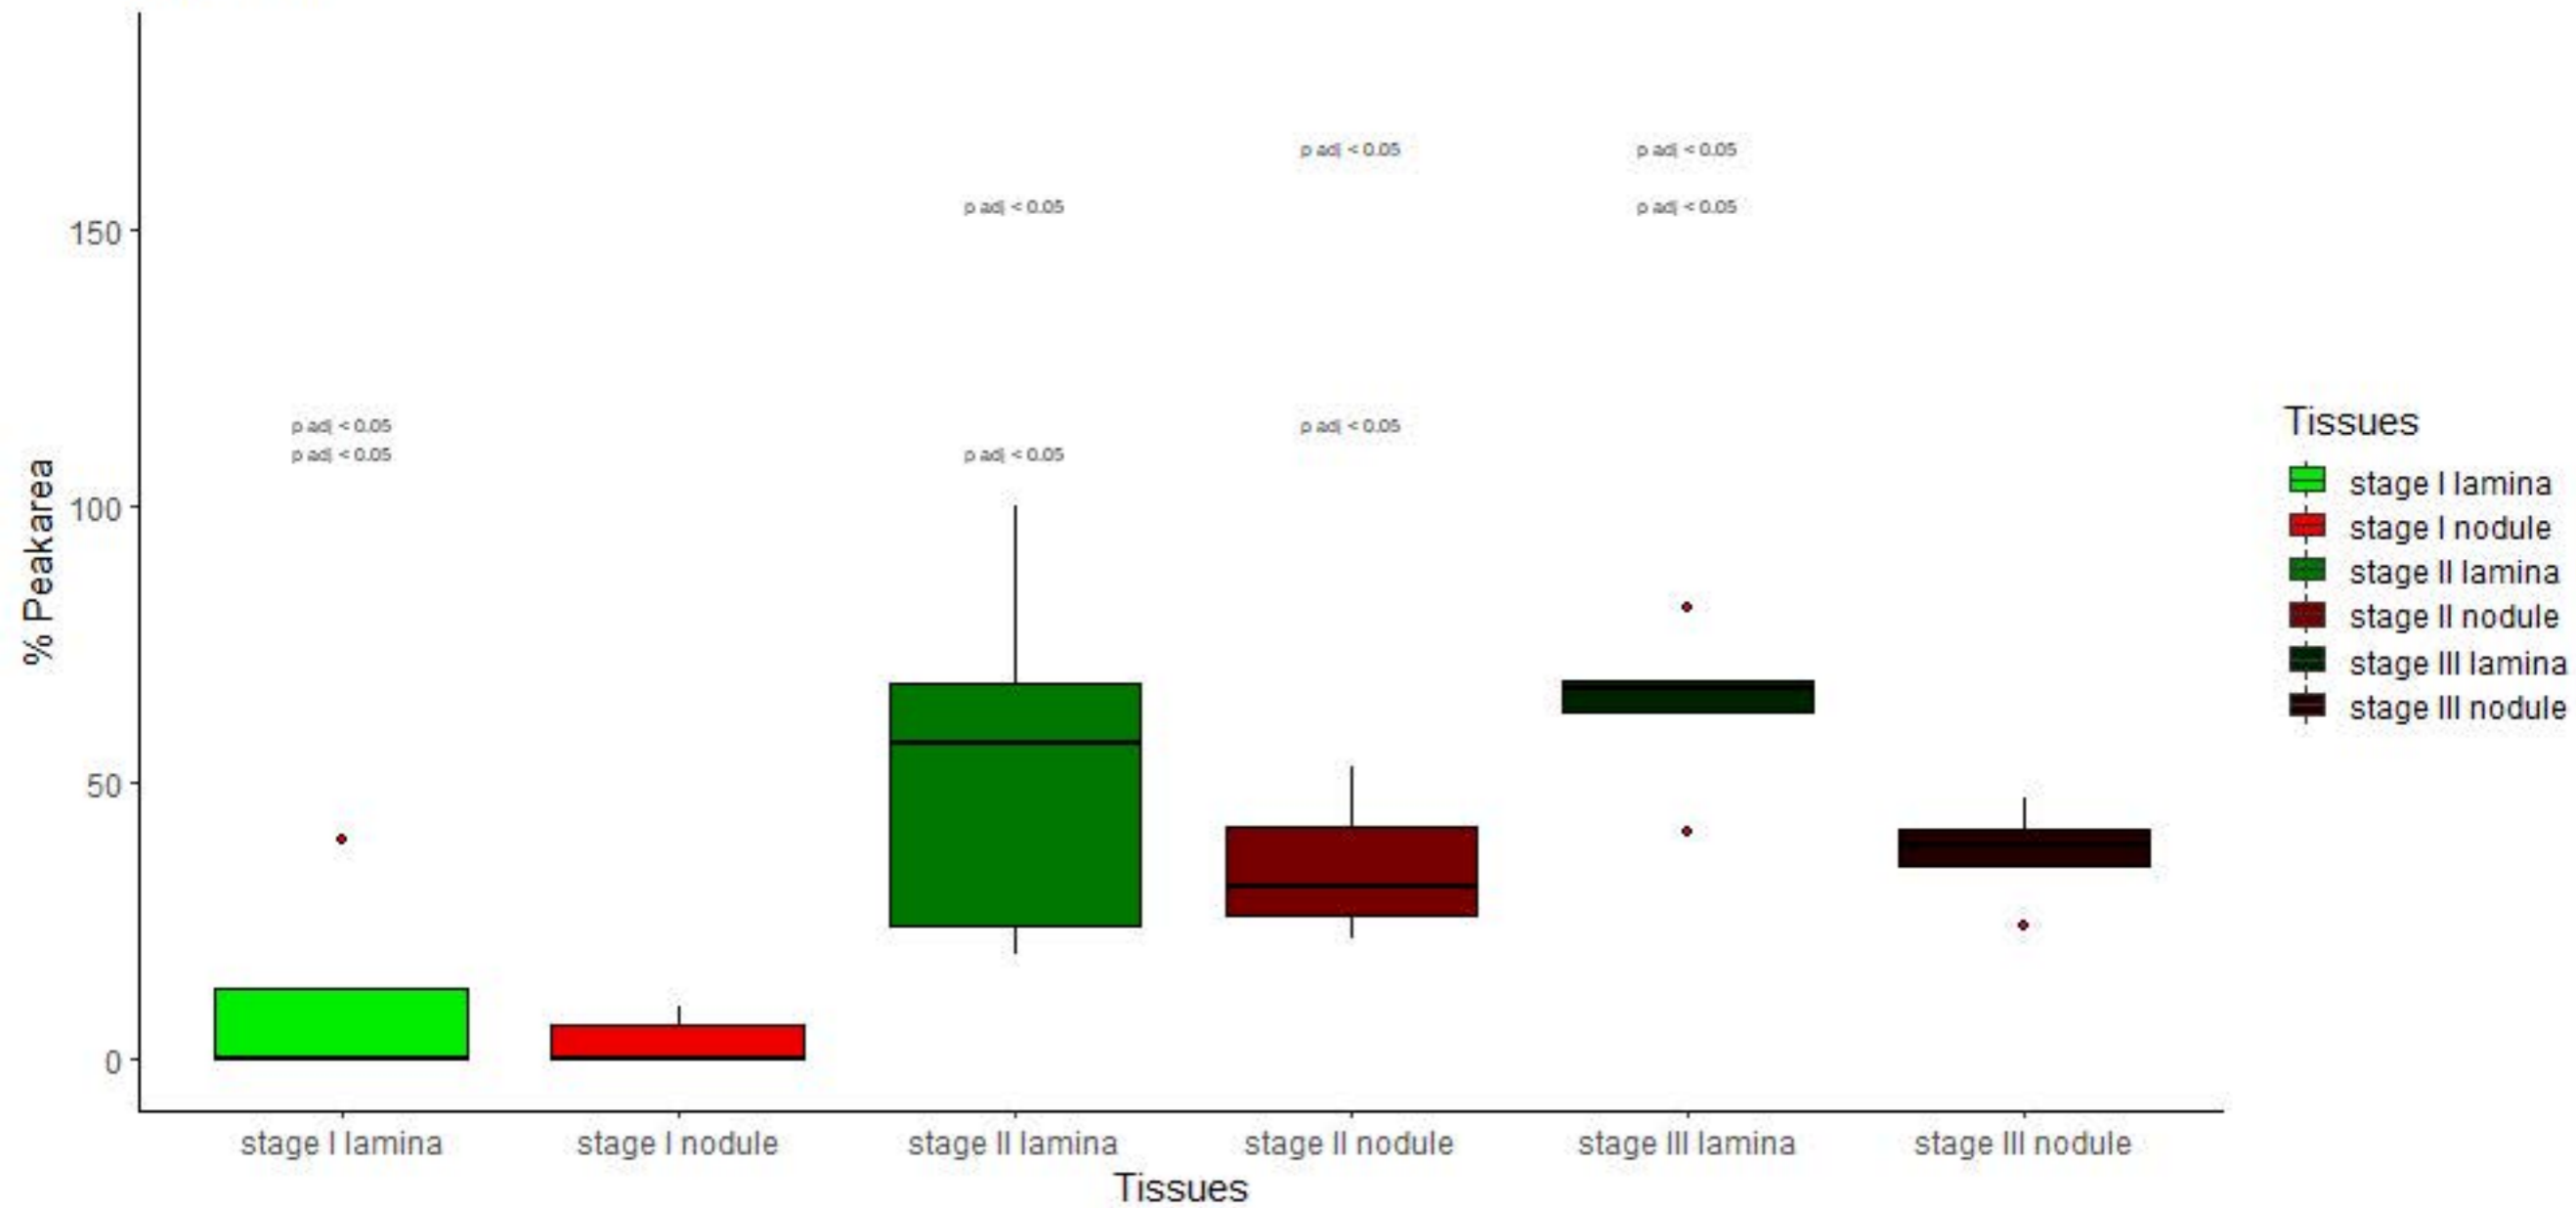

NA 120

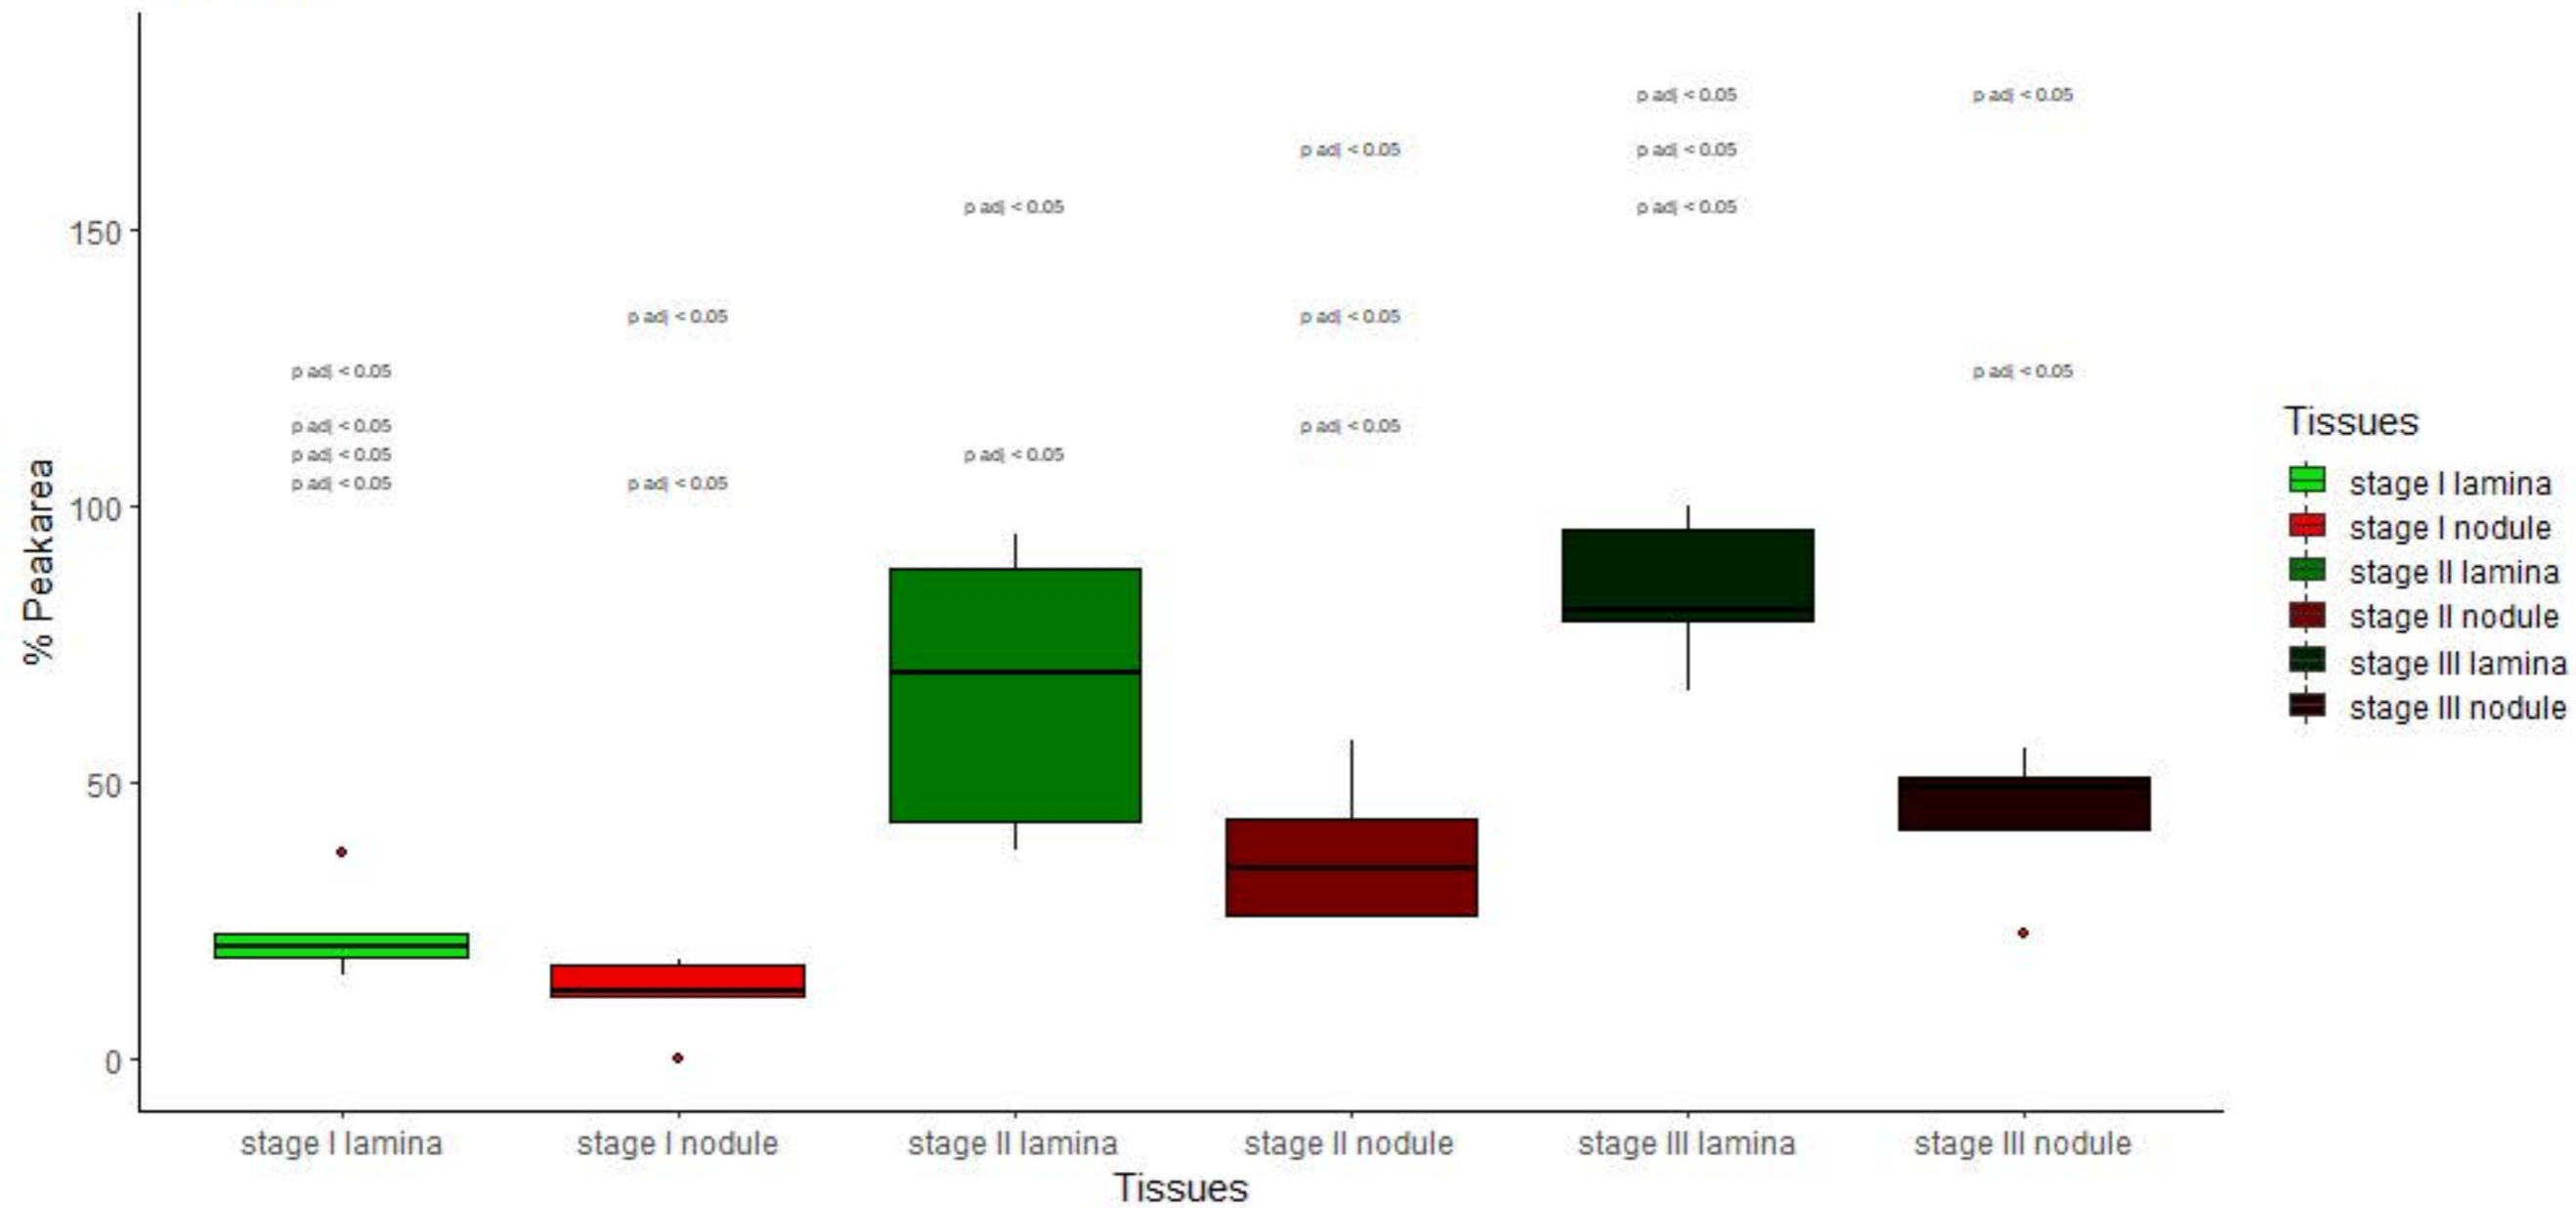

NA 121

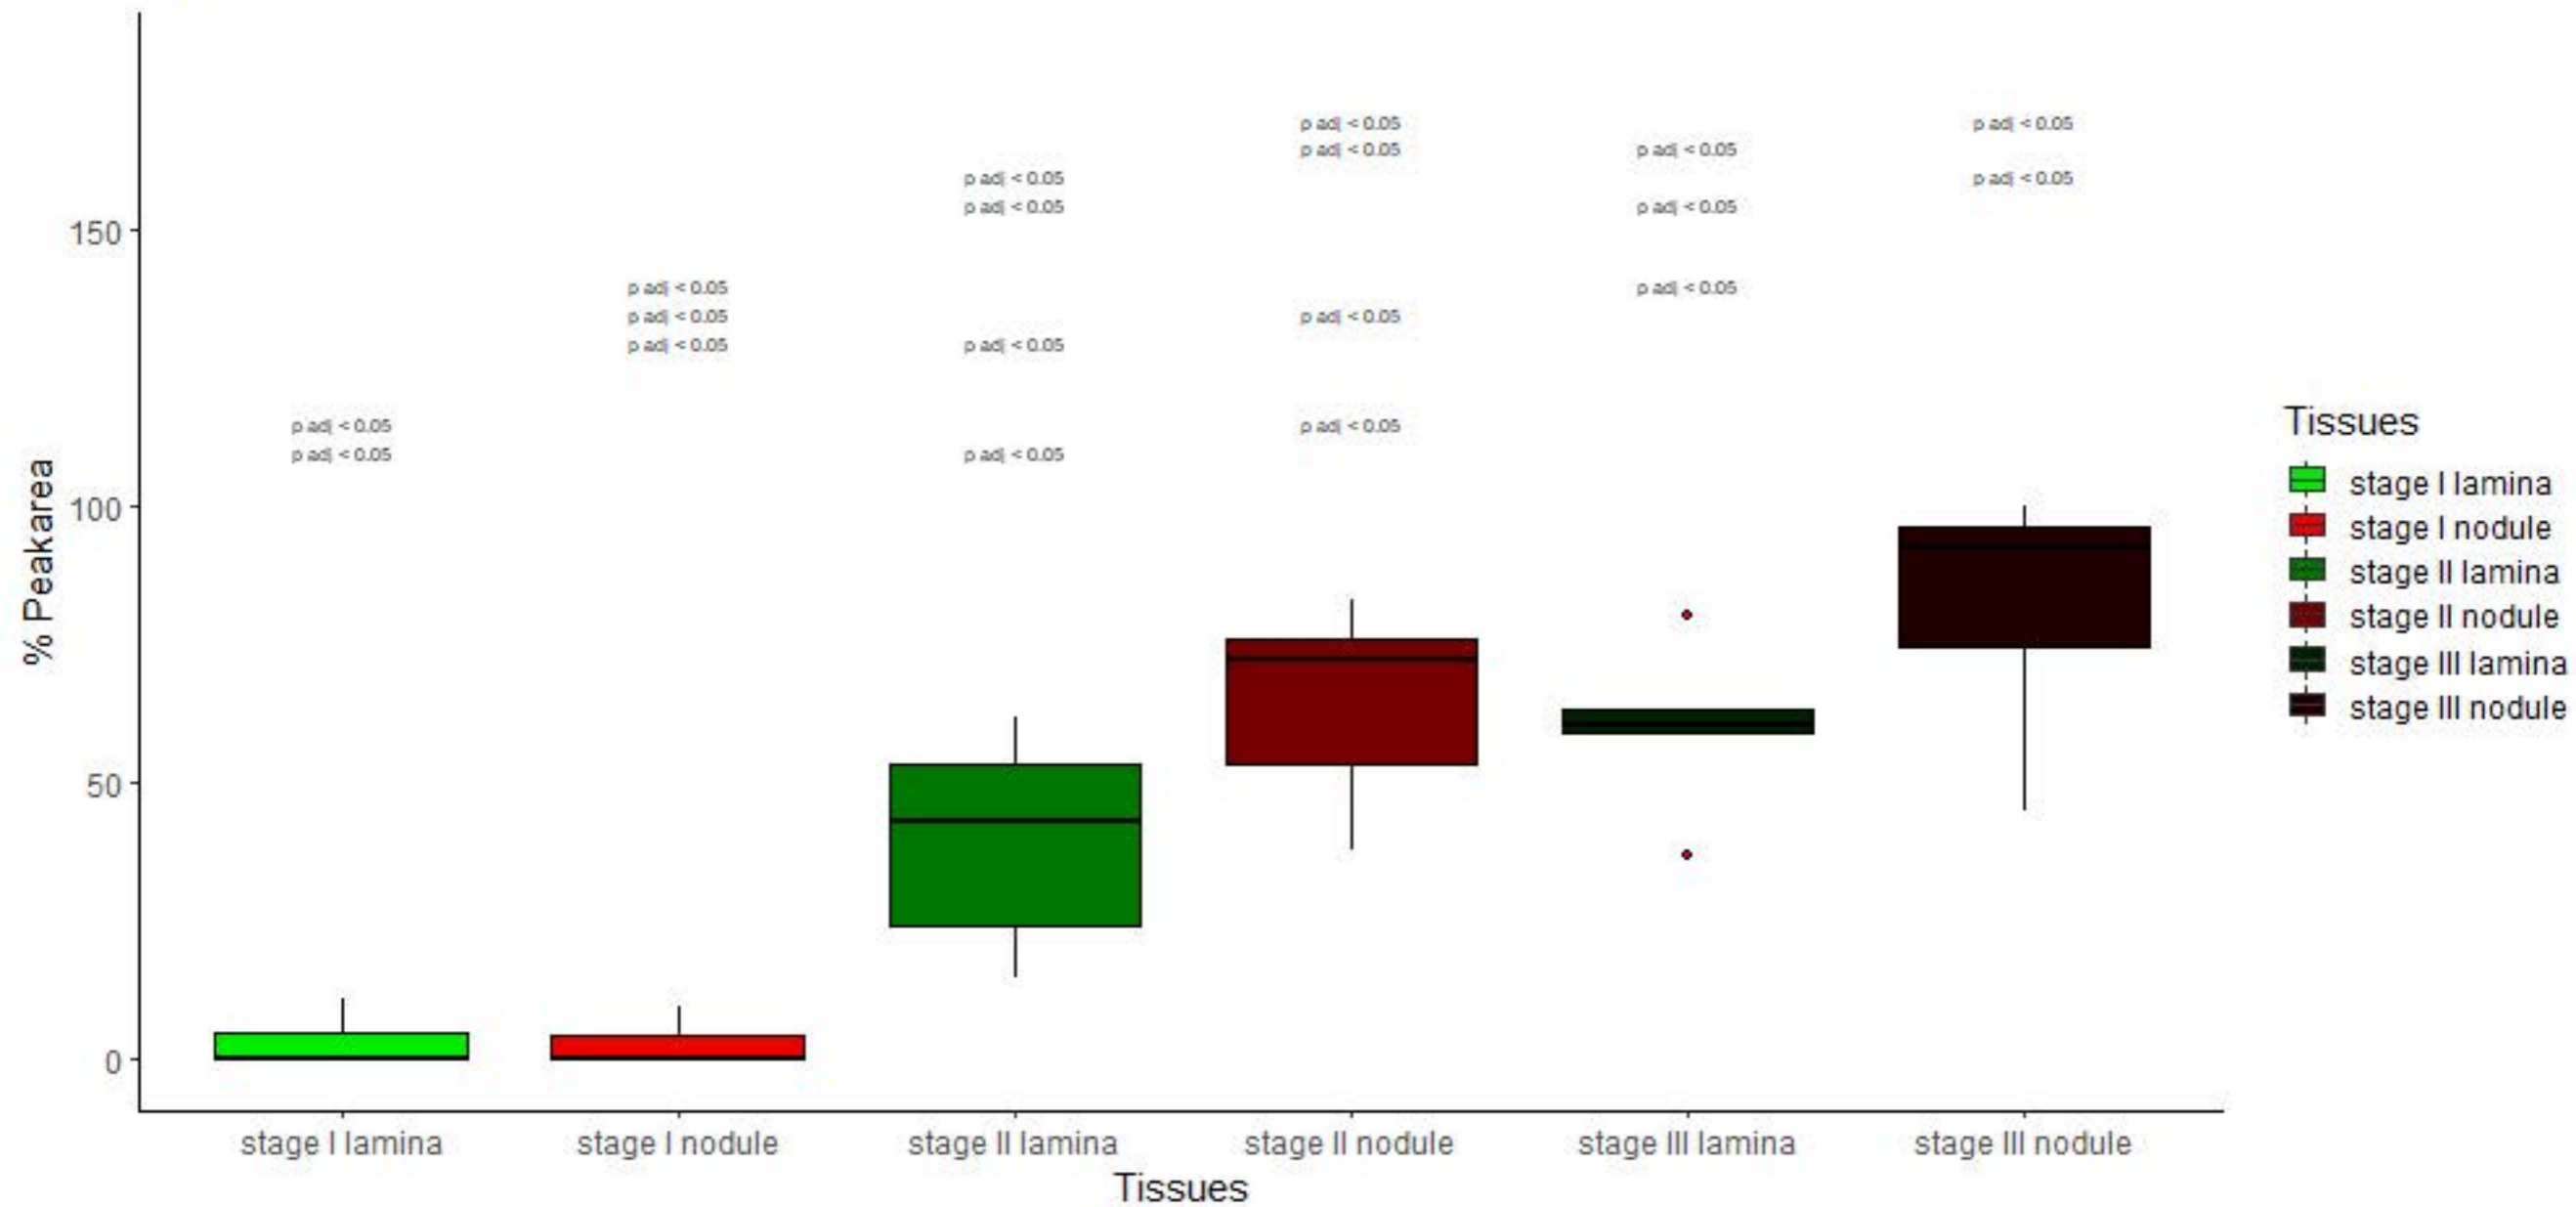

NA 122

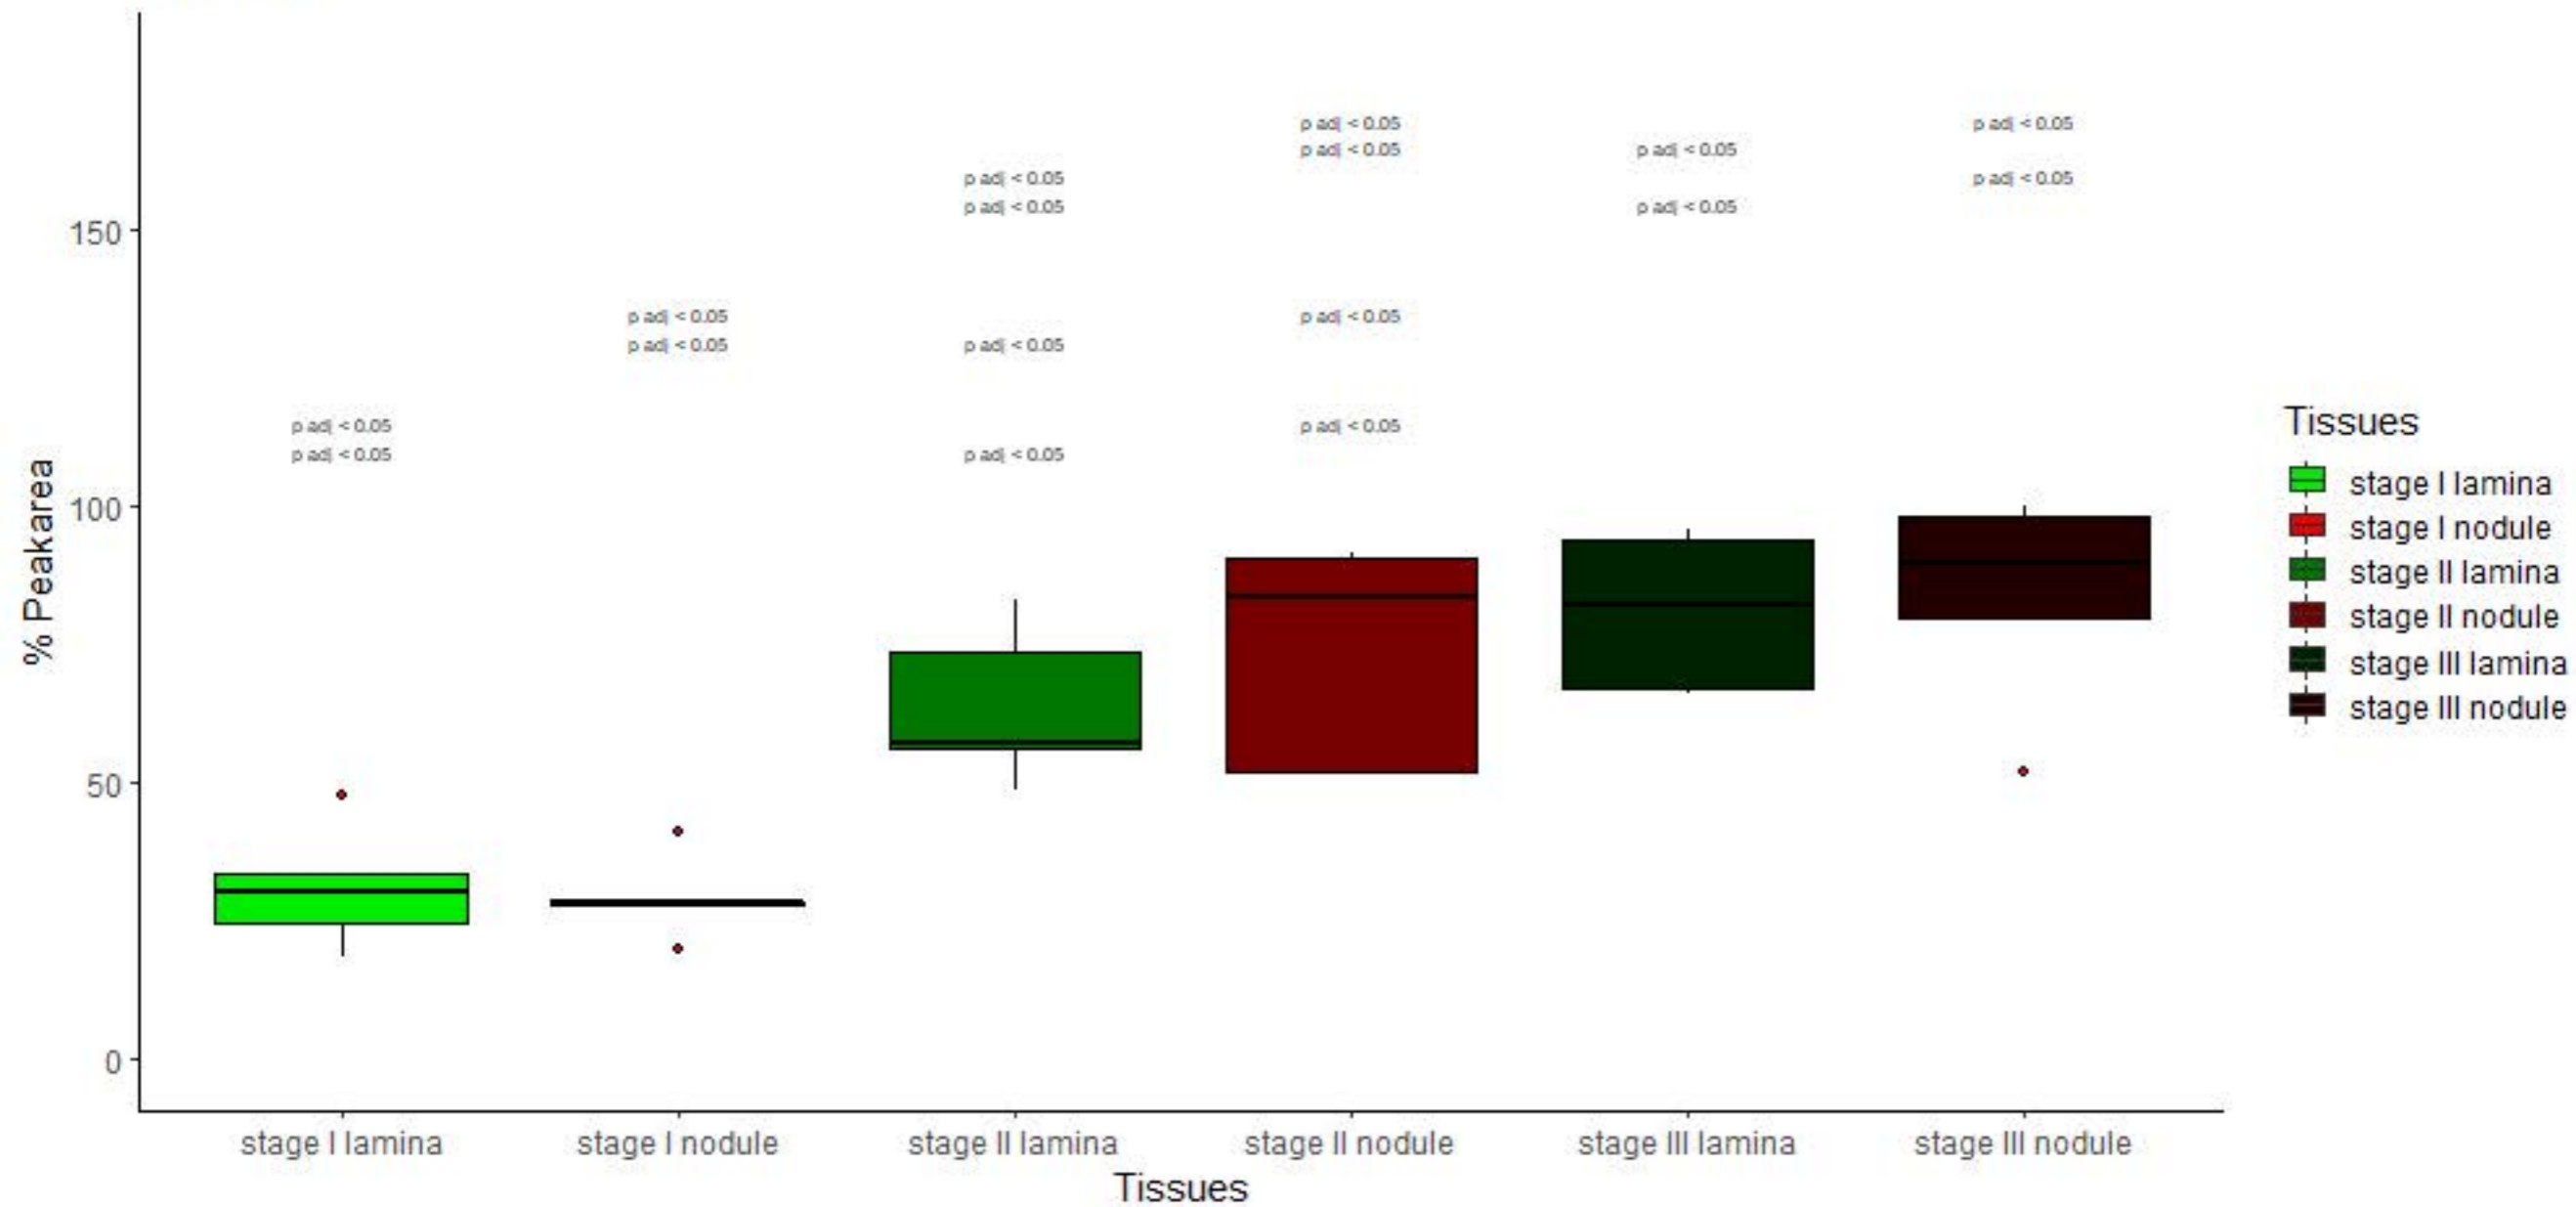

NA 123

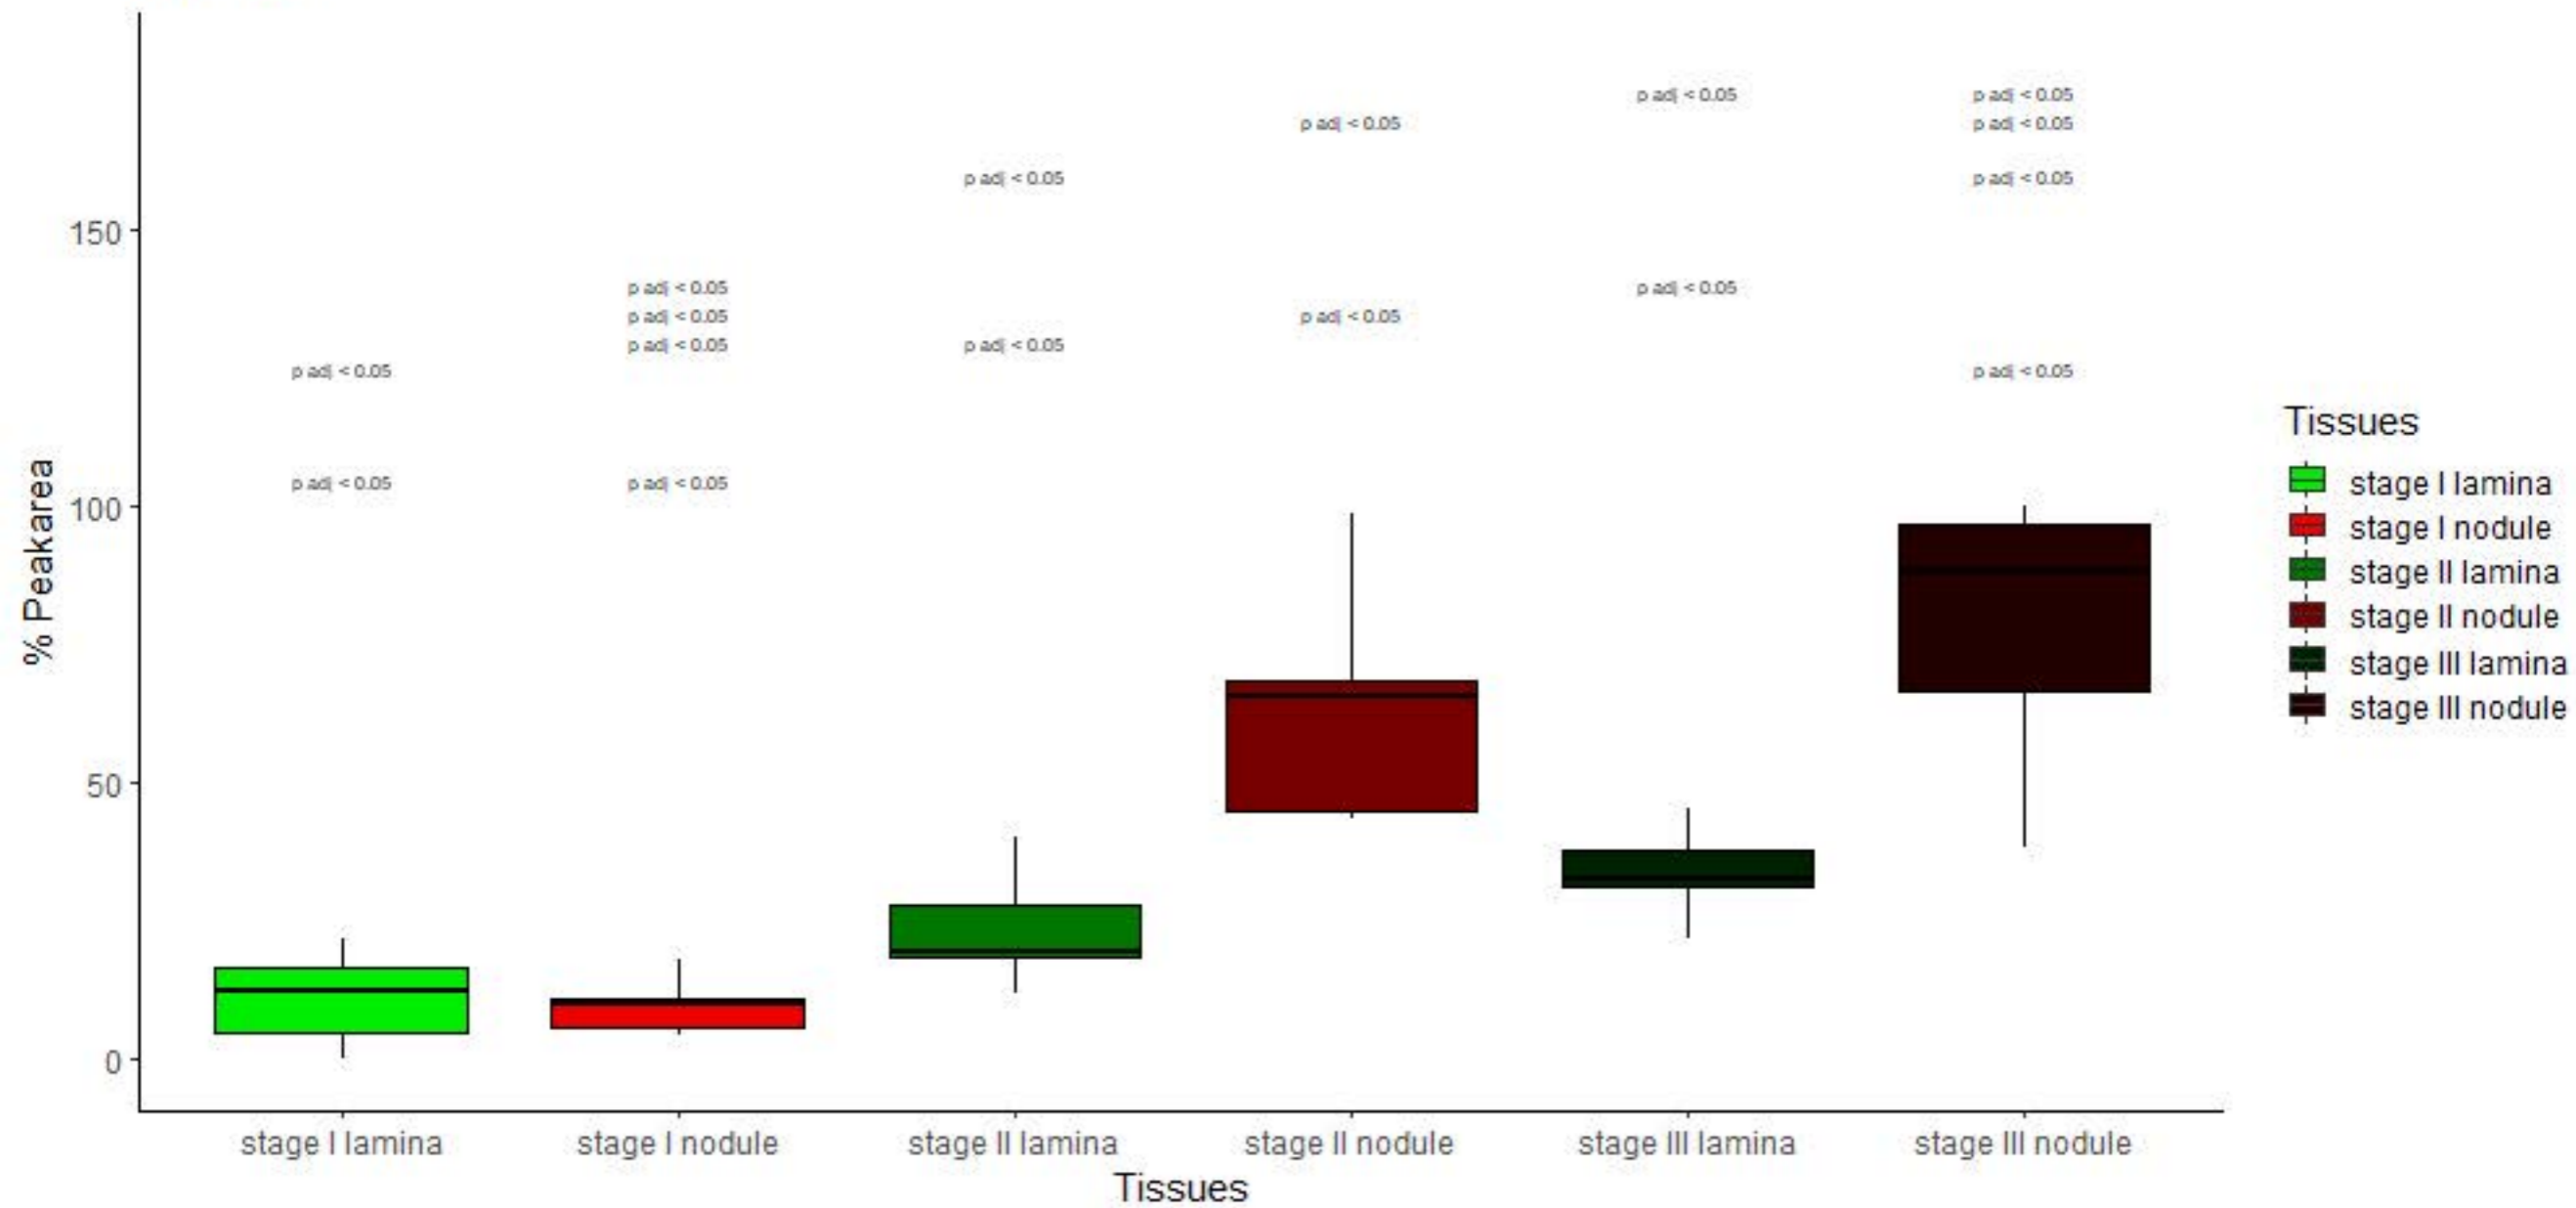

NA 124

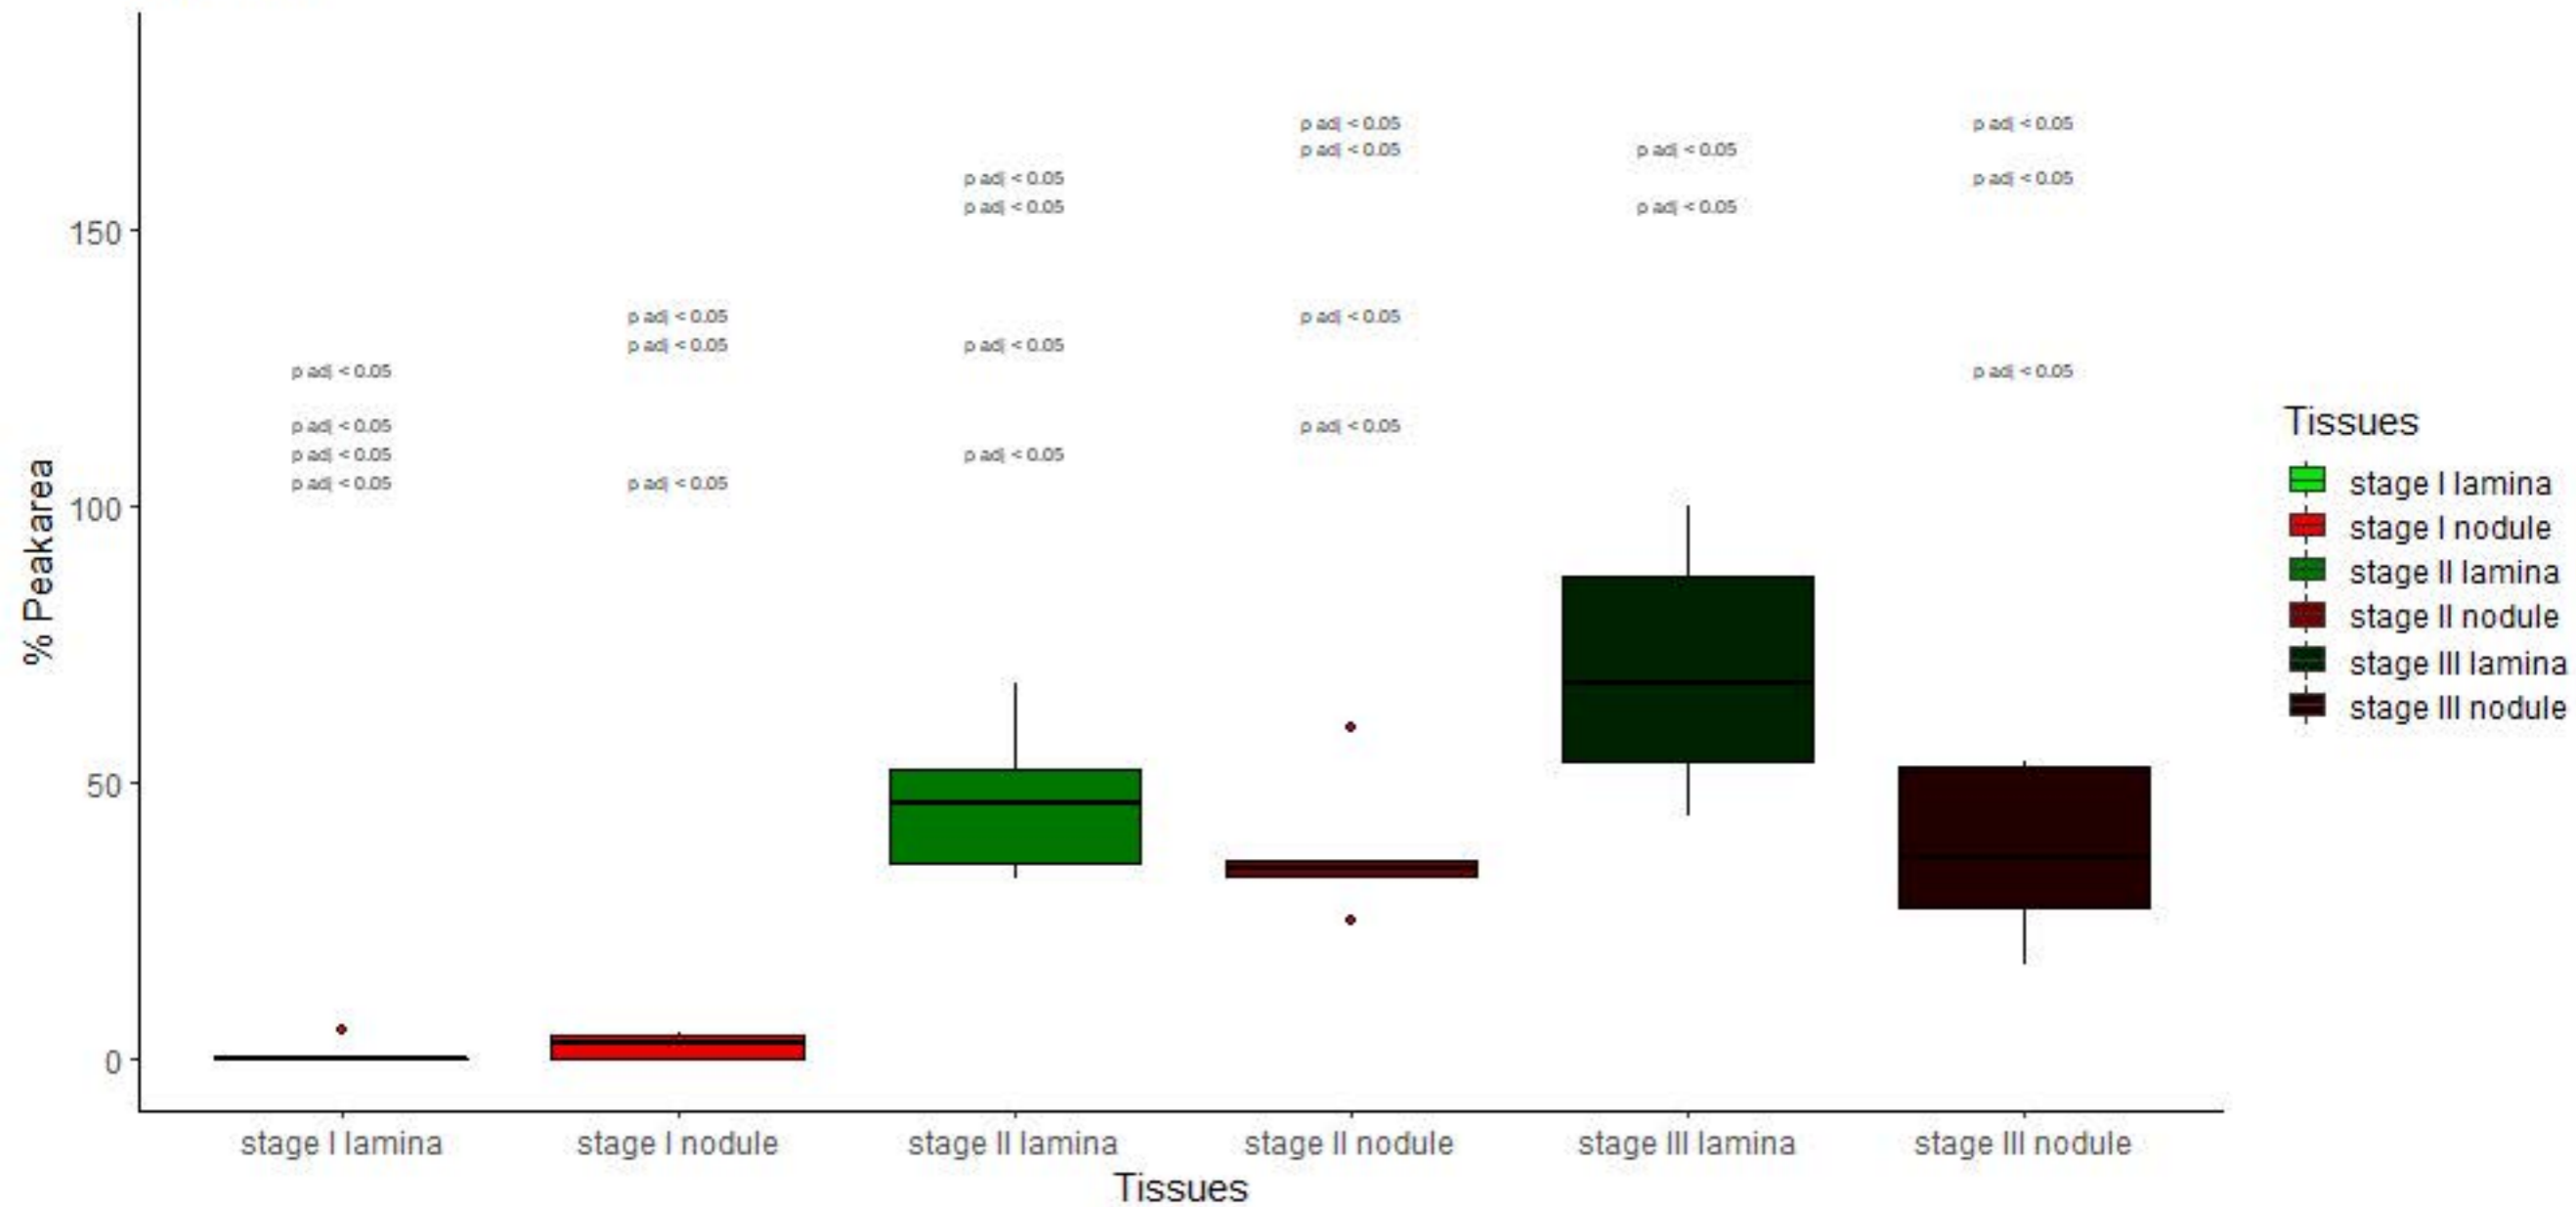

NA 128

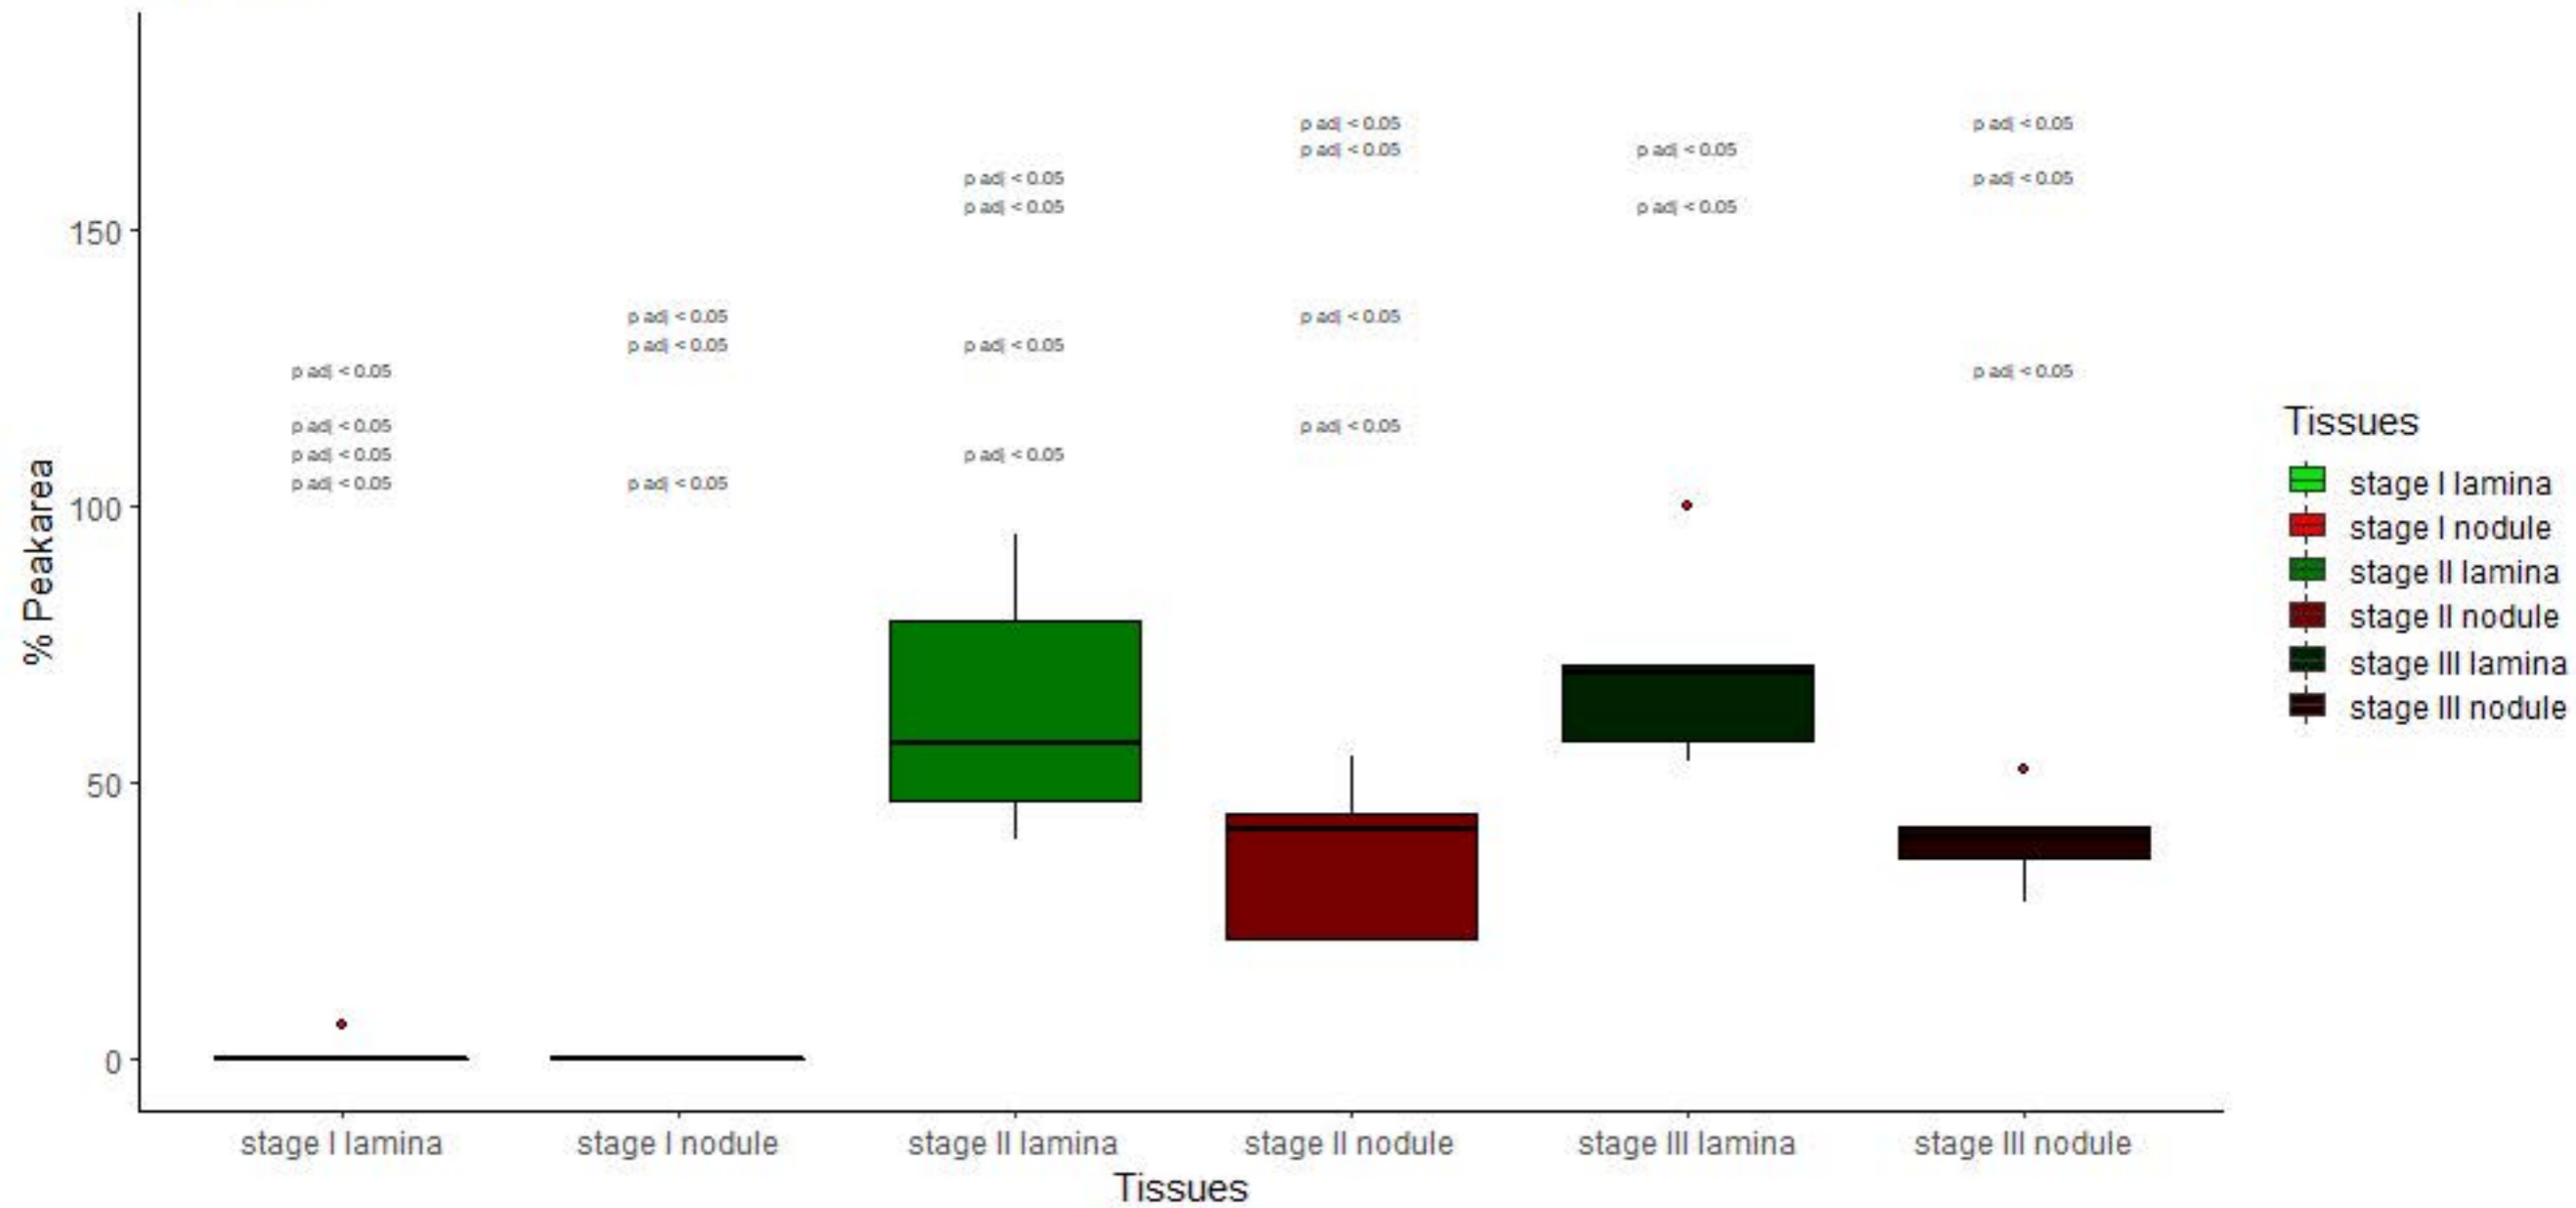

NA 129

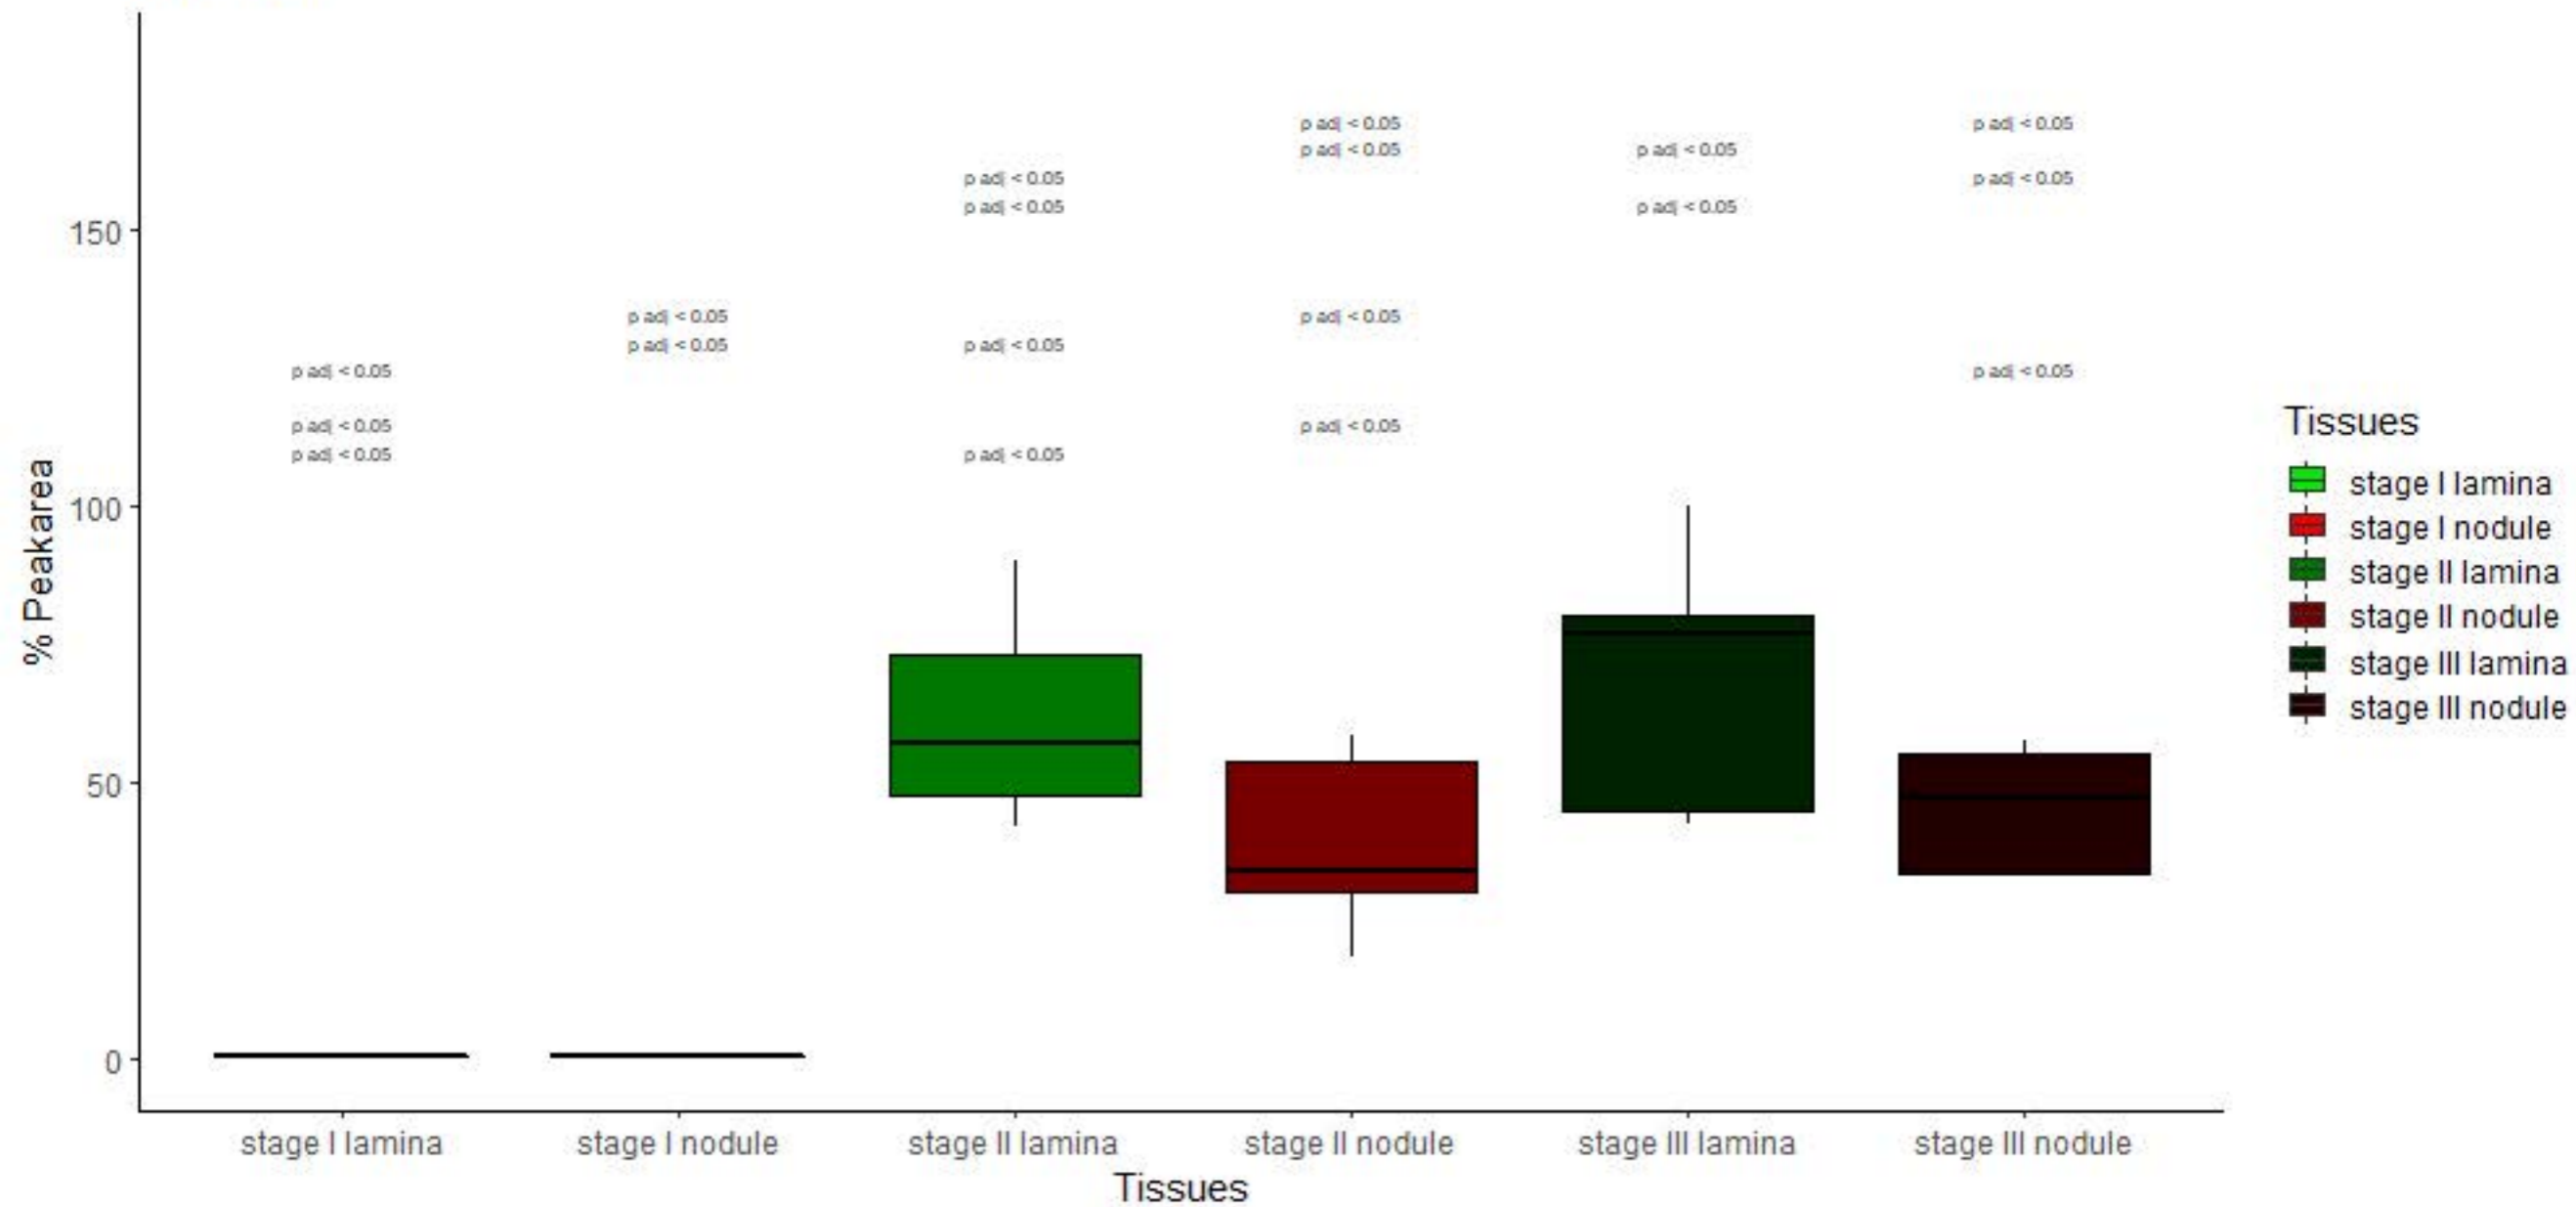



NA 130

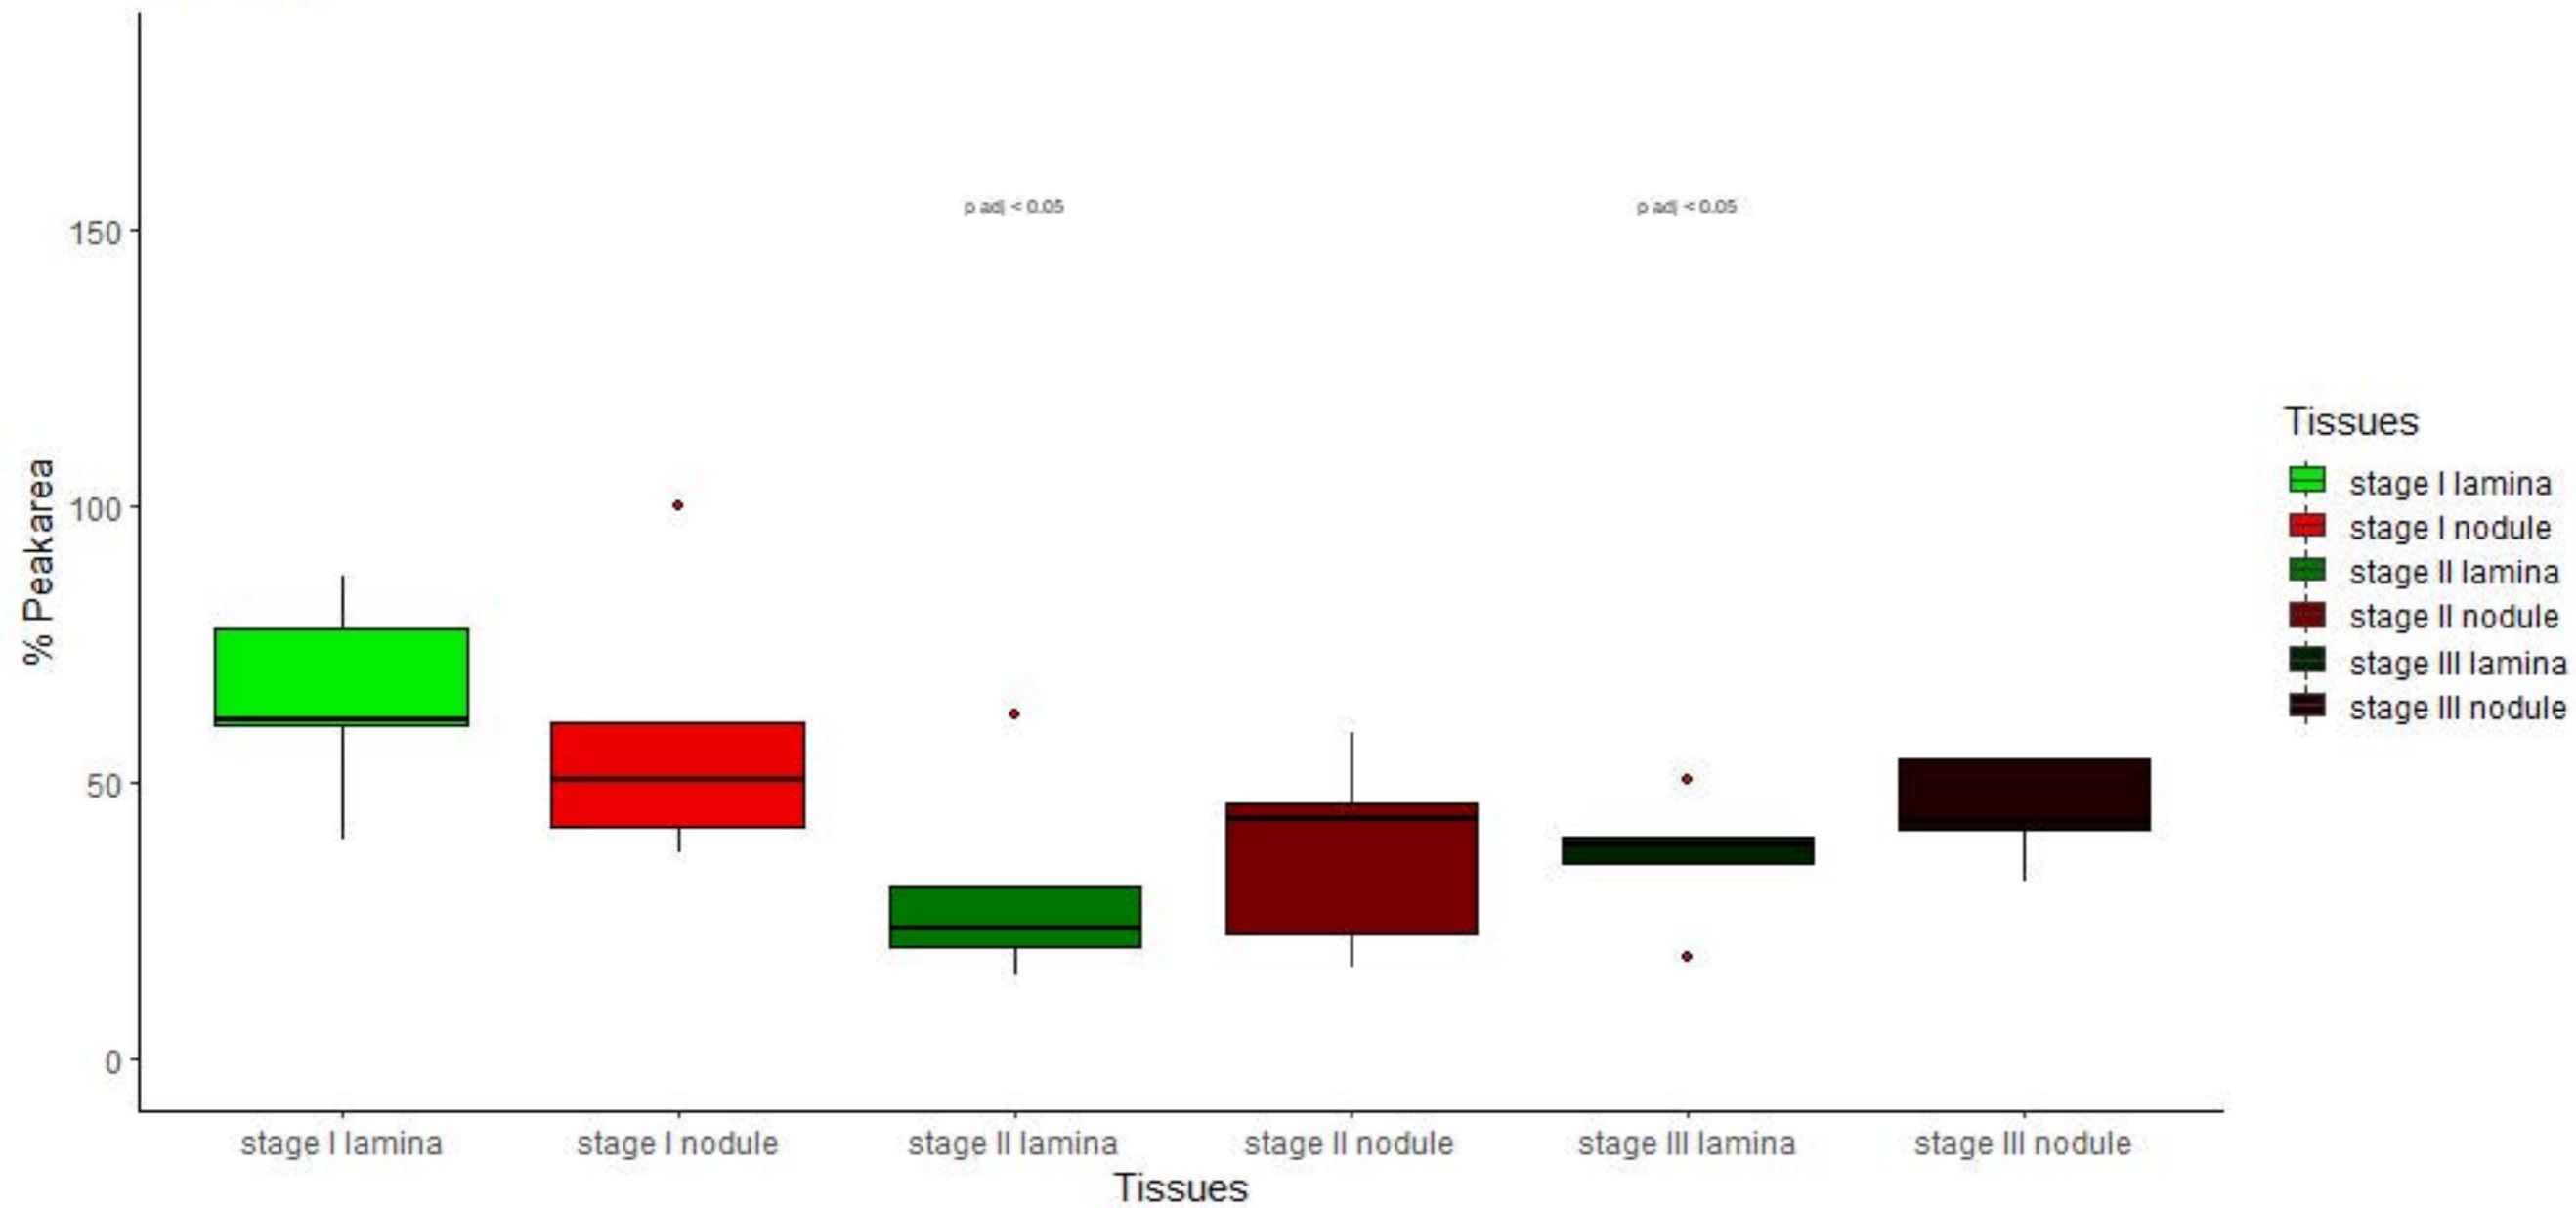

NA 132

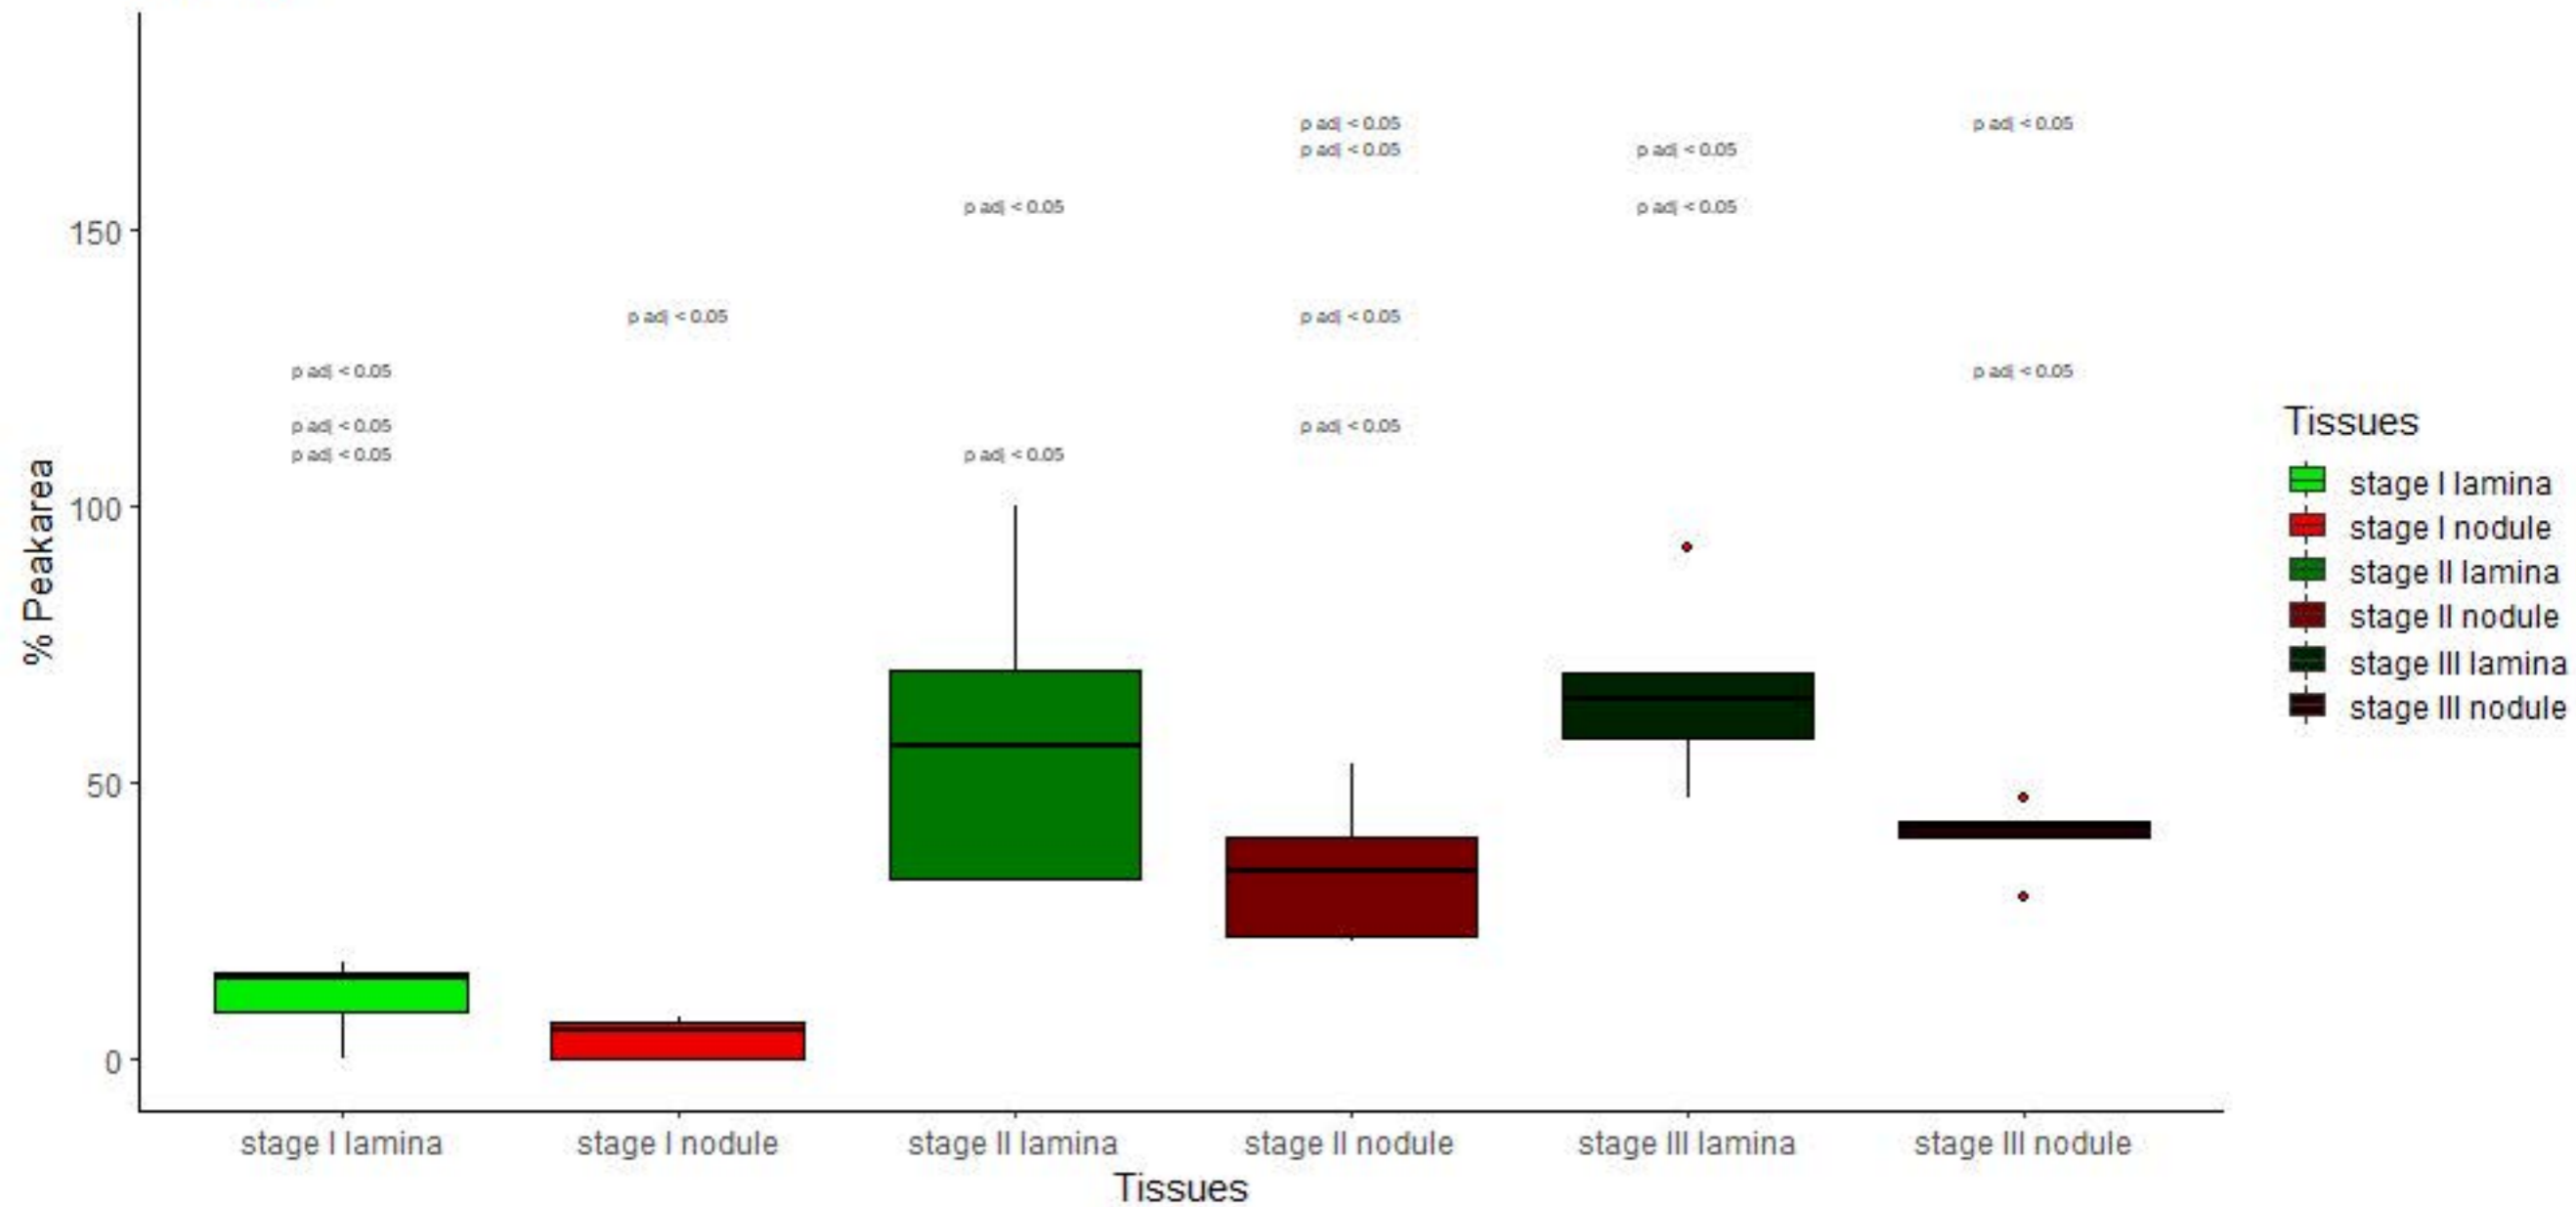

NA 165

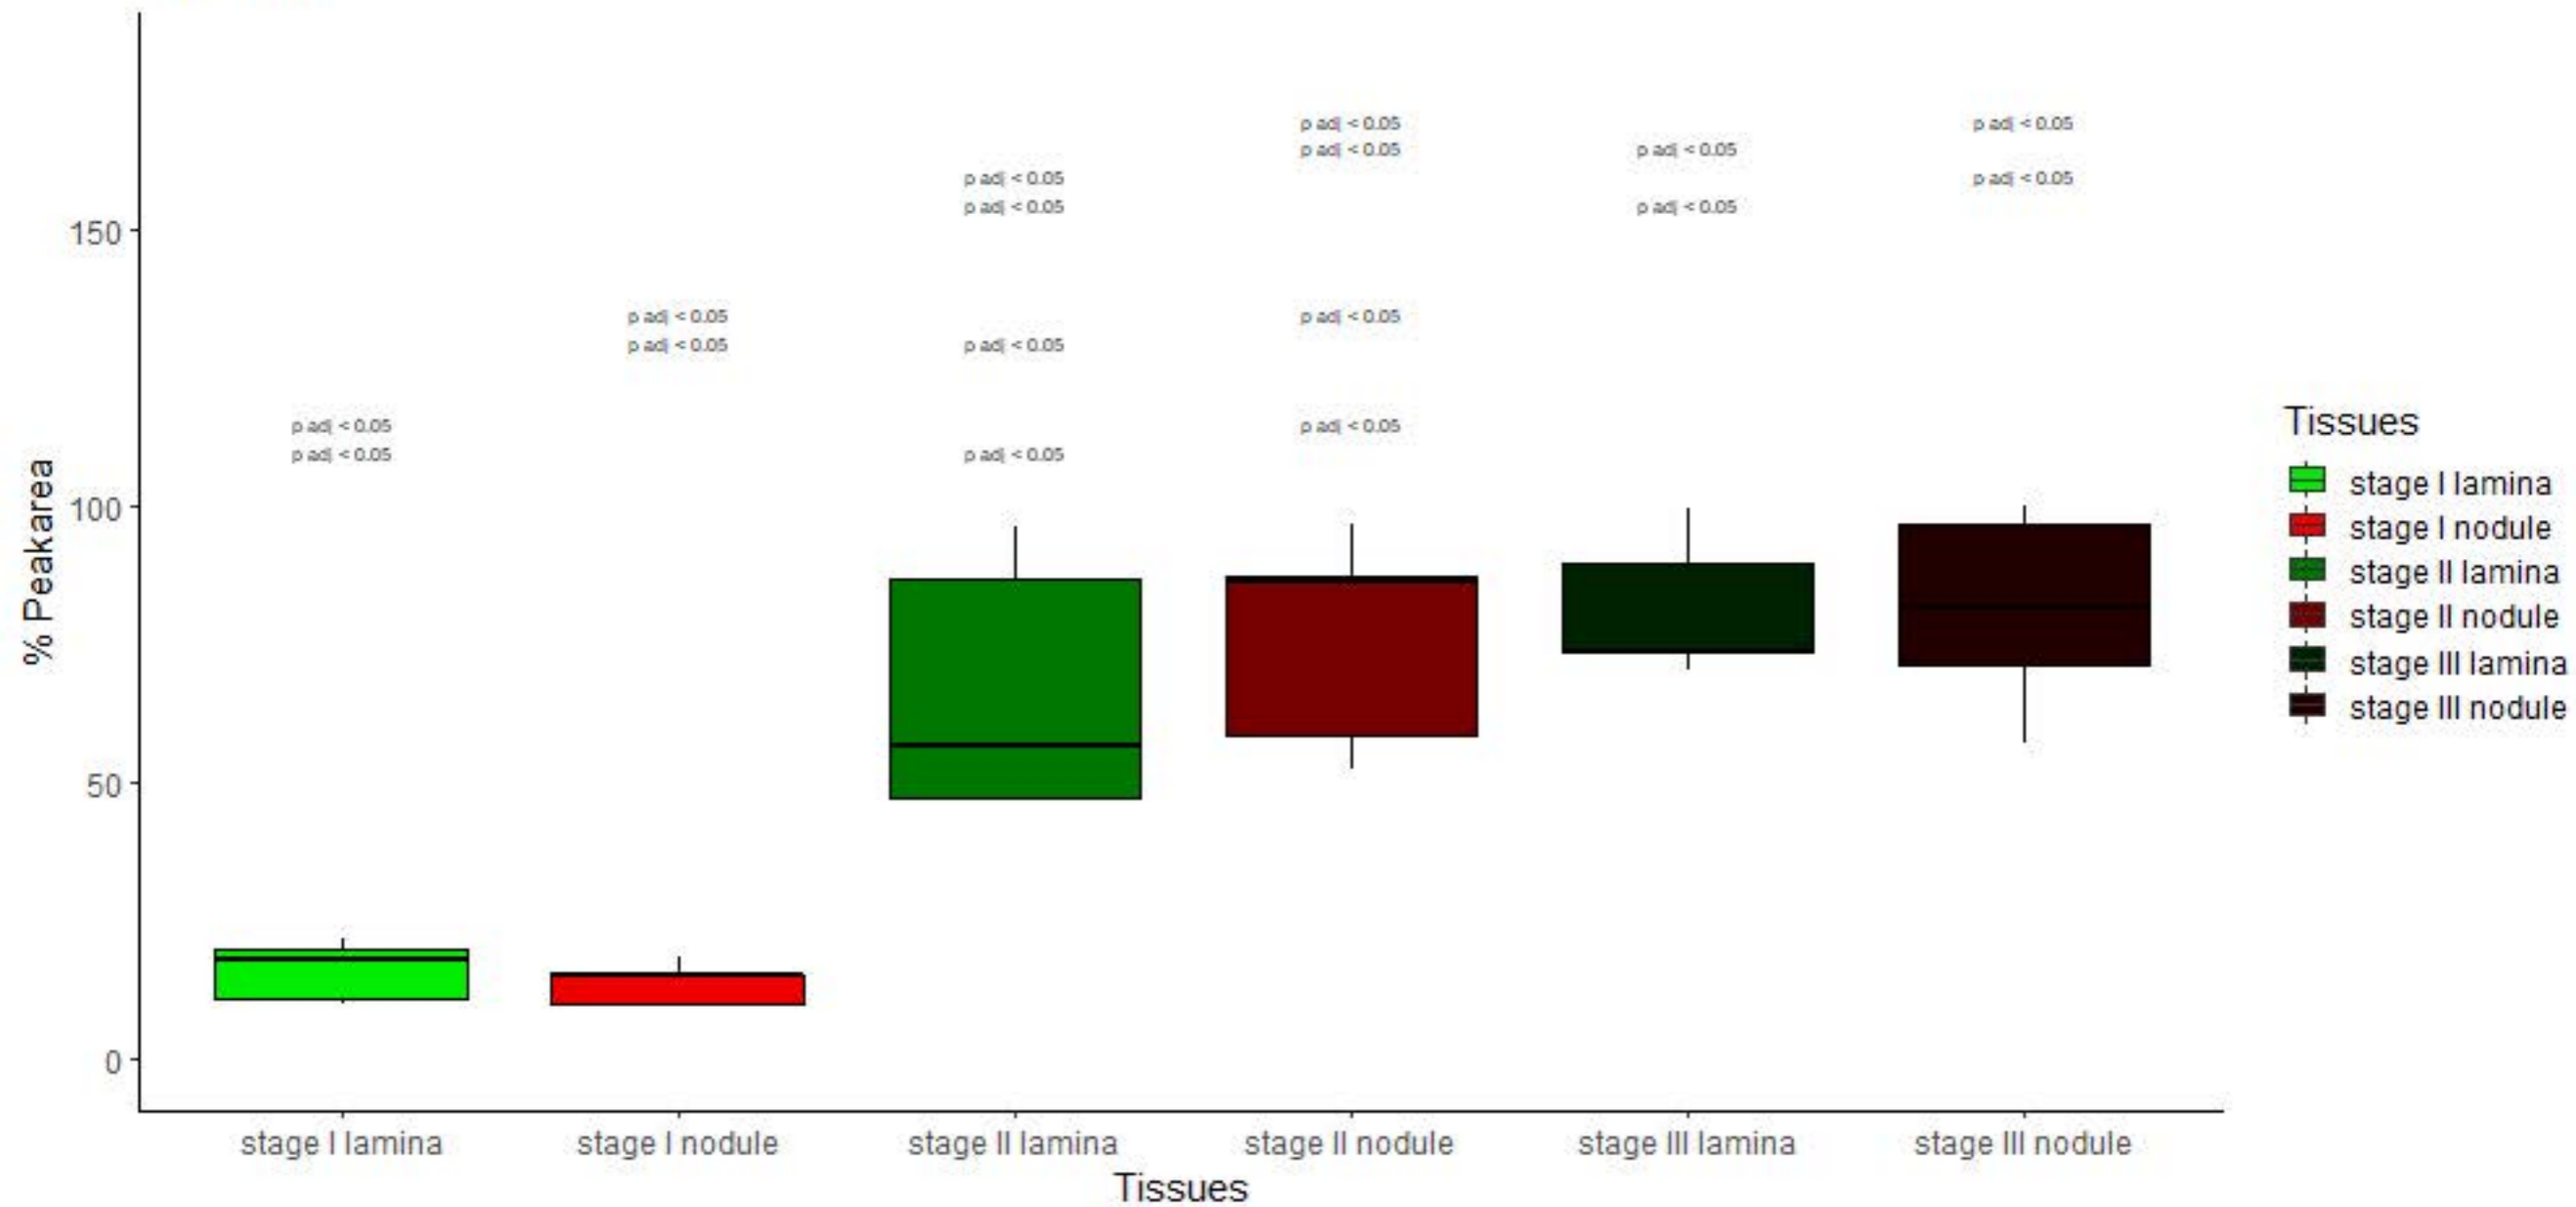

NA 176

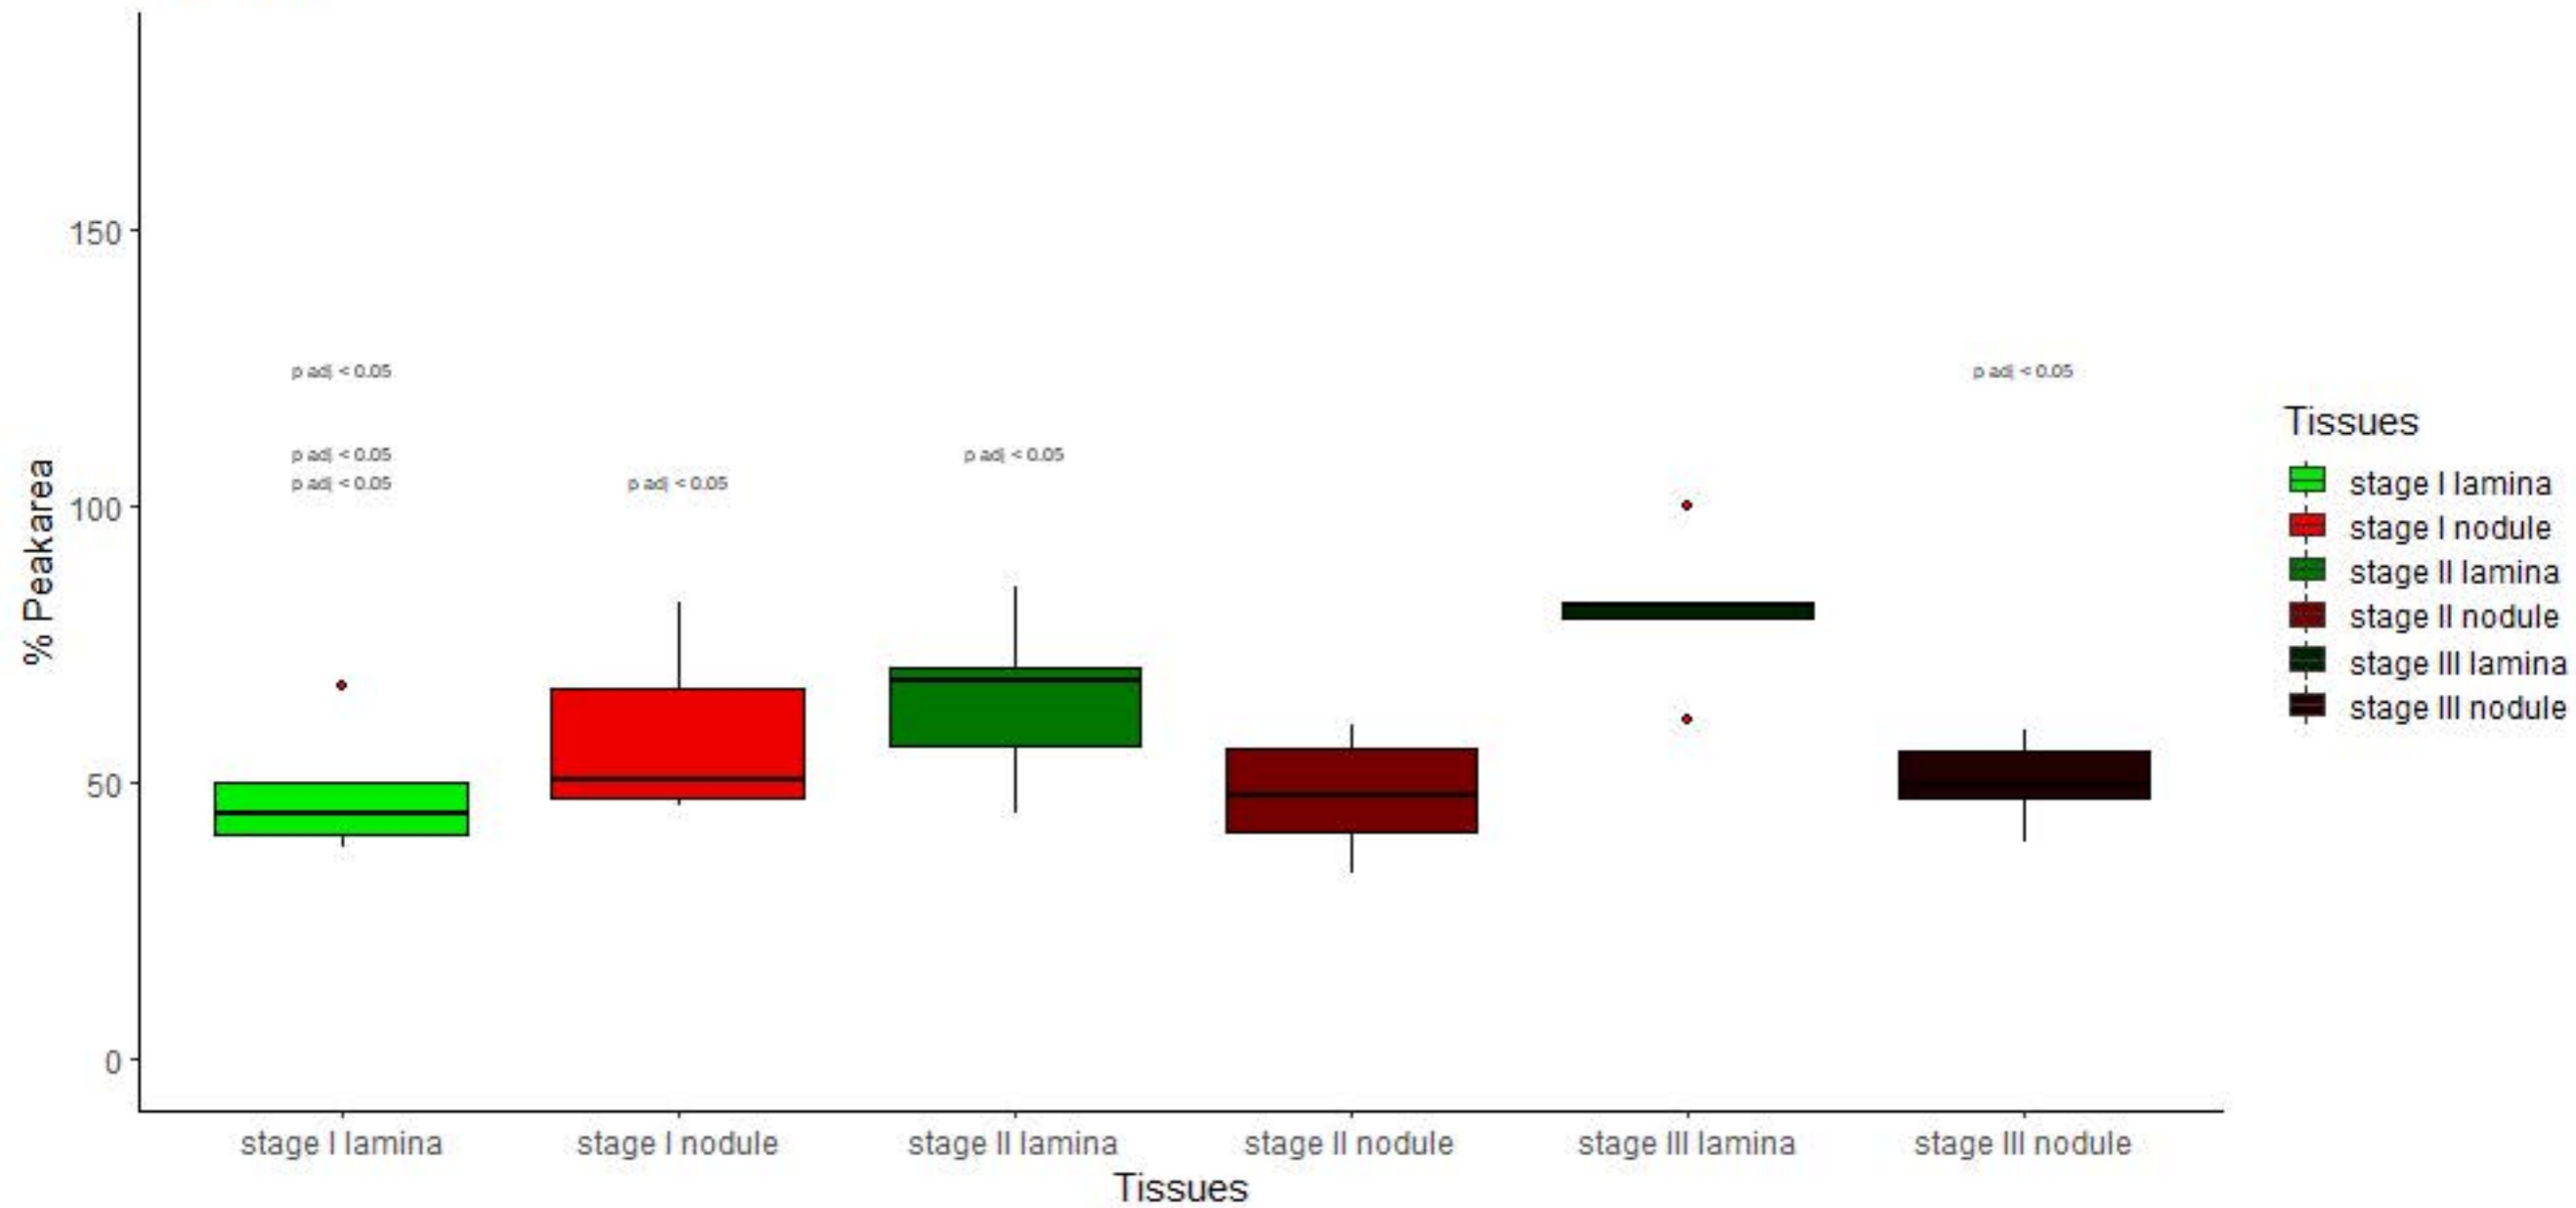

NA 36

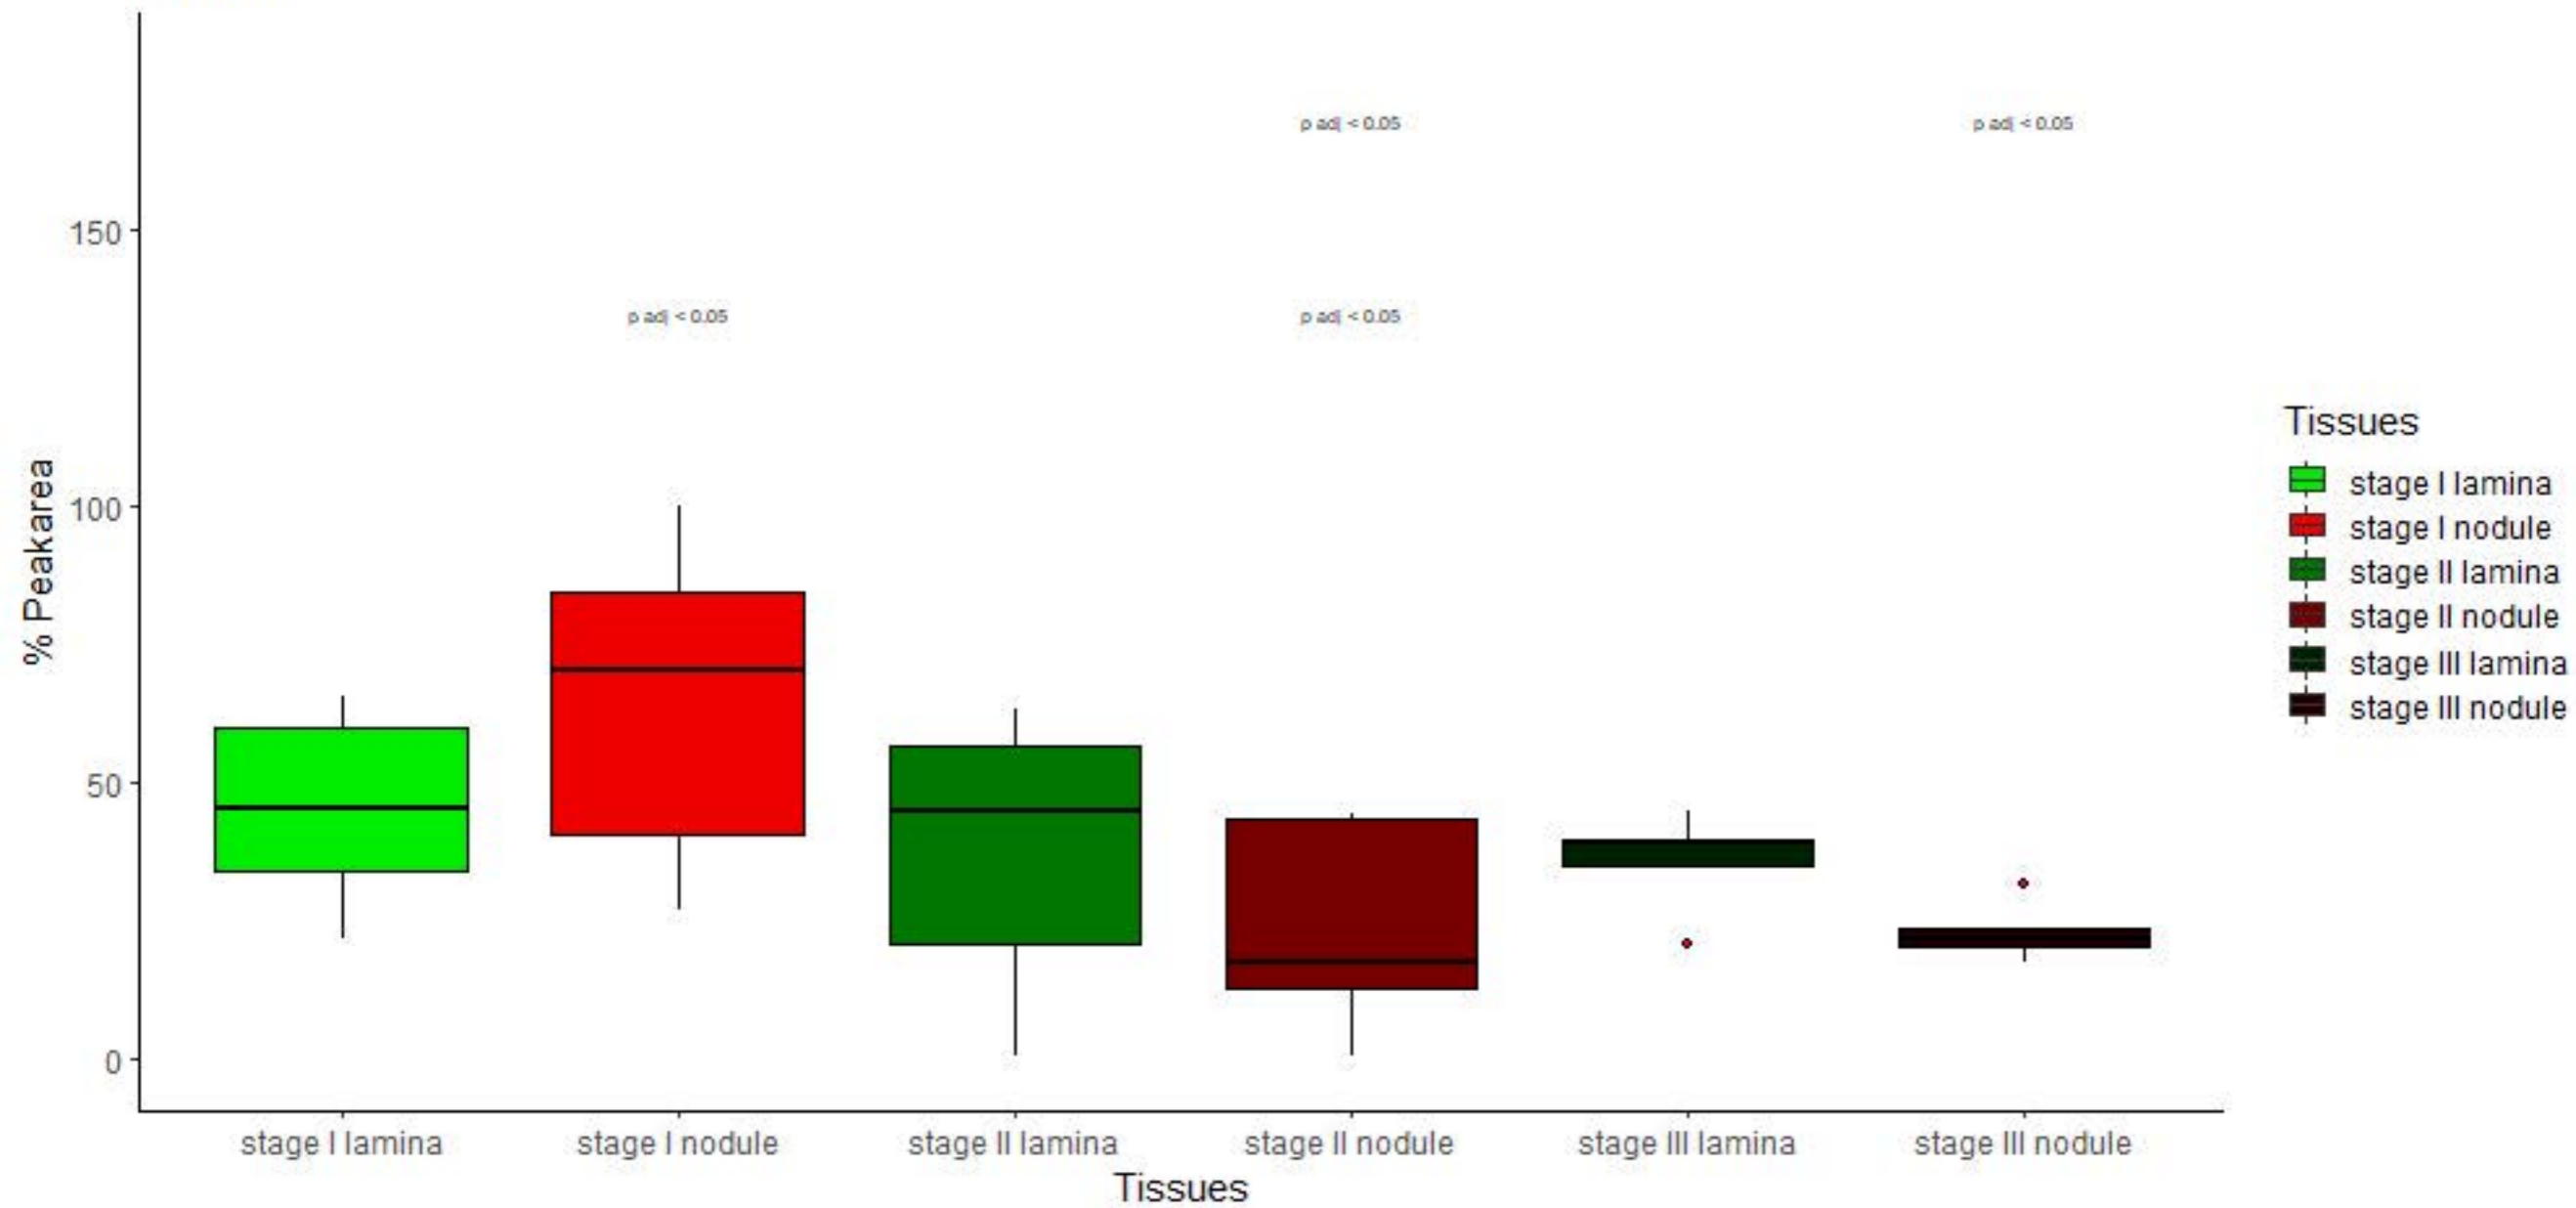

NA 39

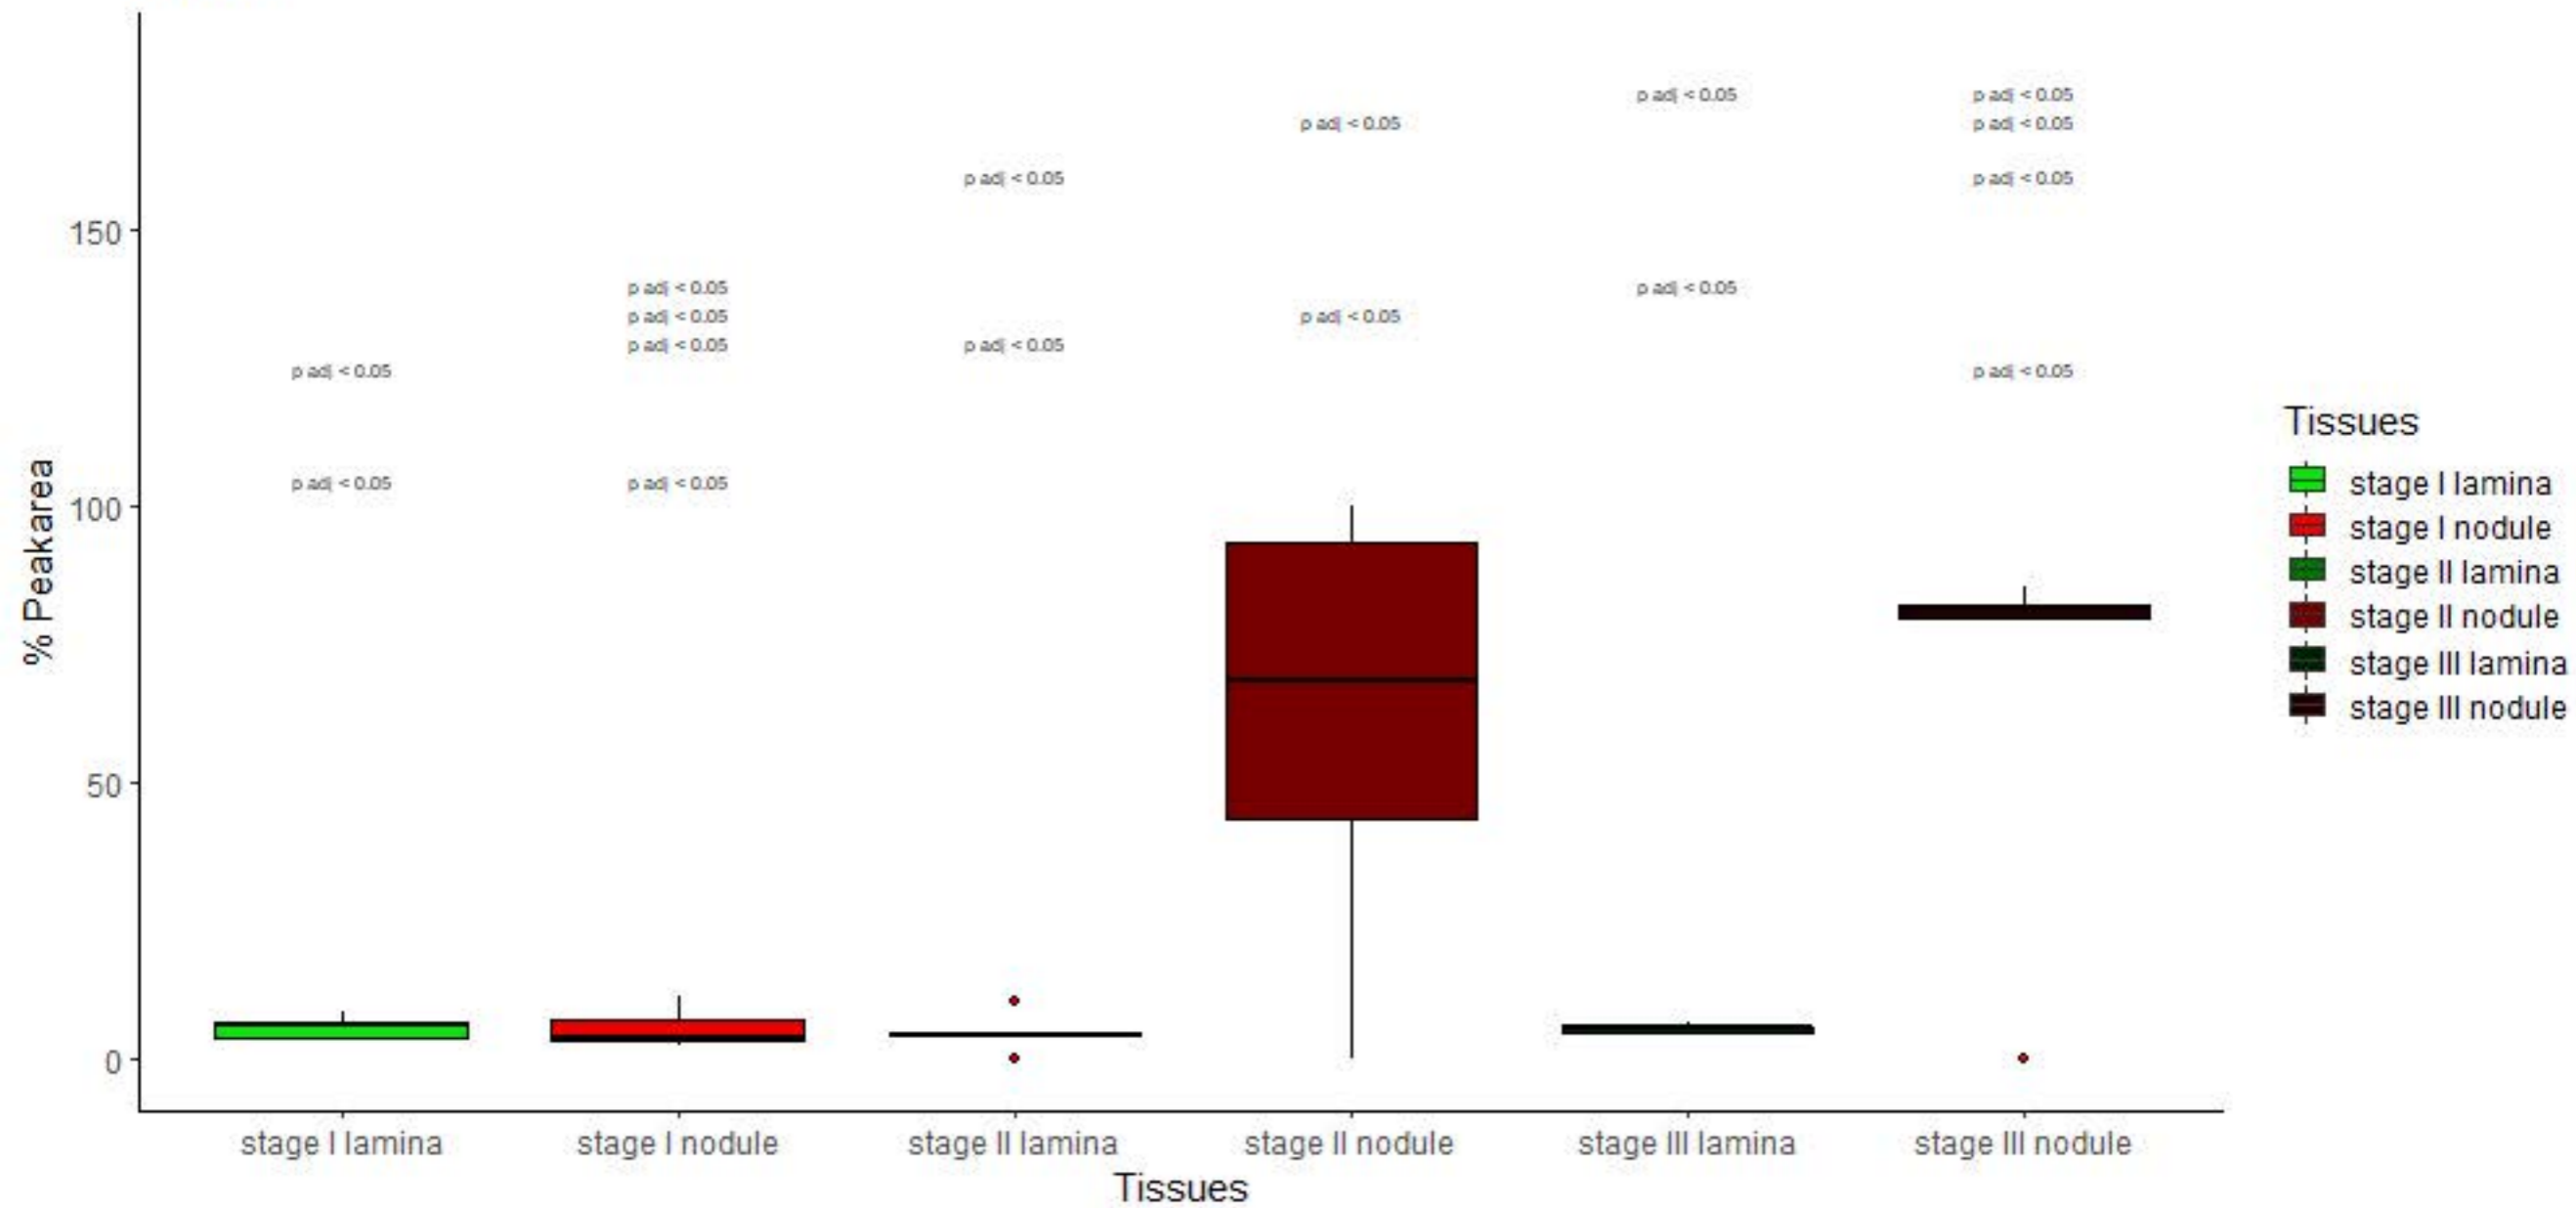

NA 47

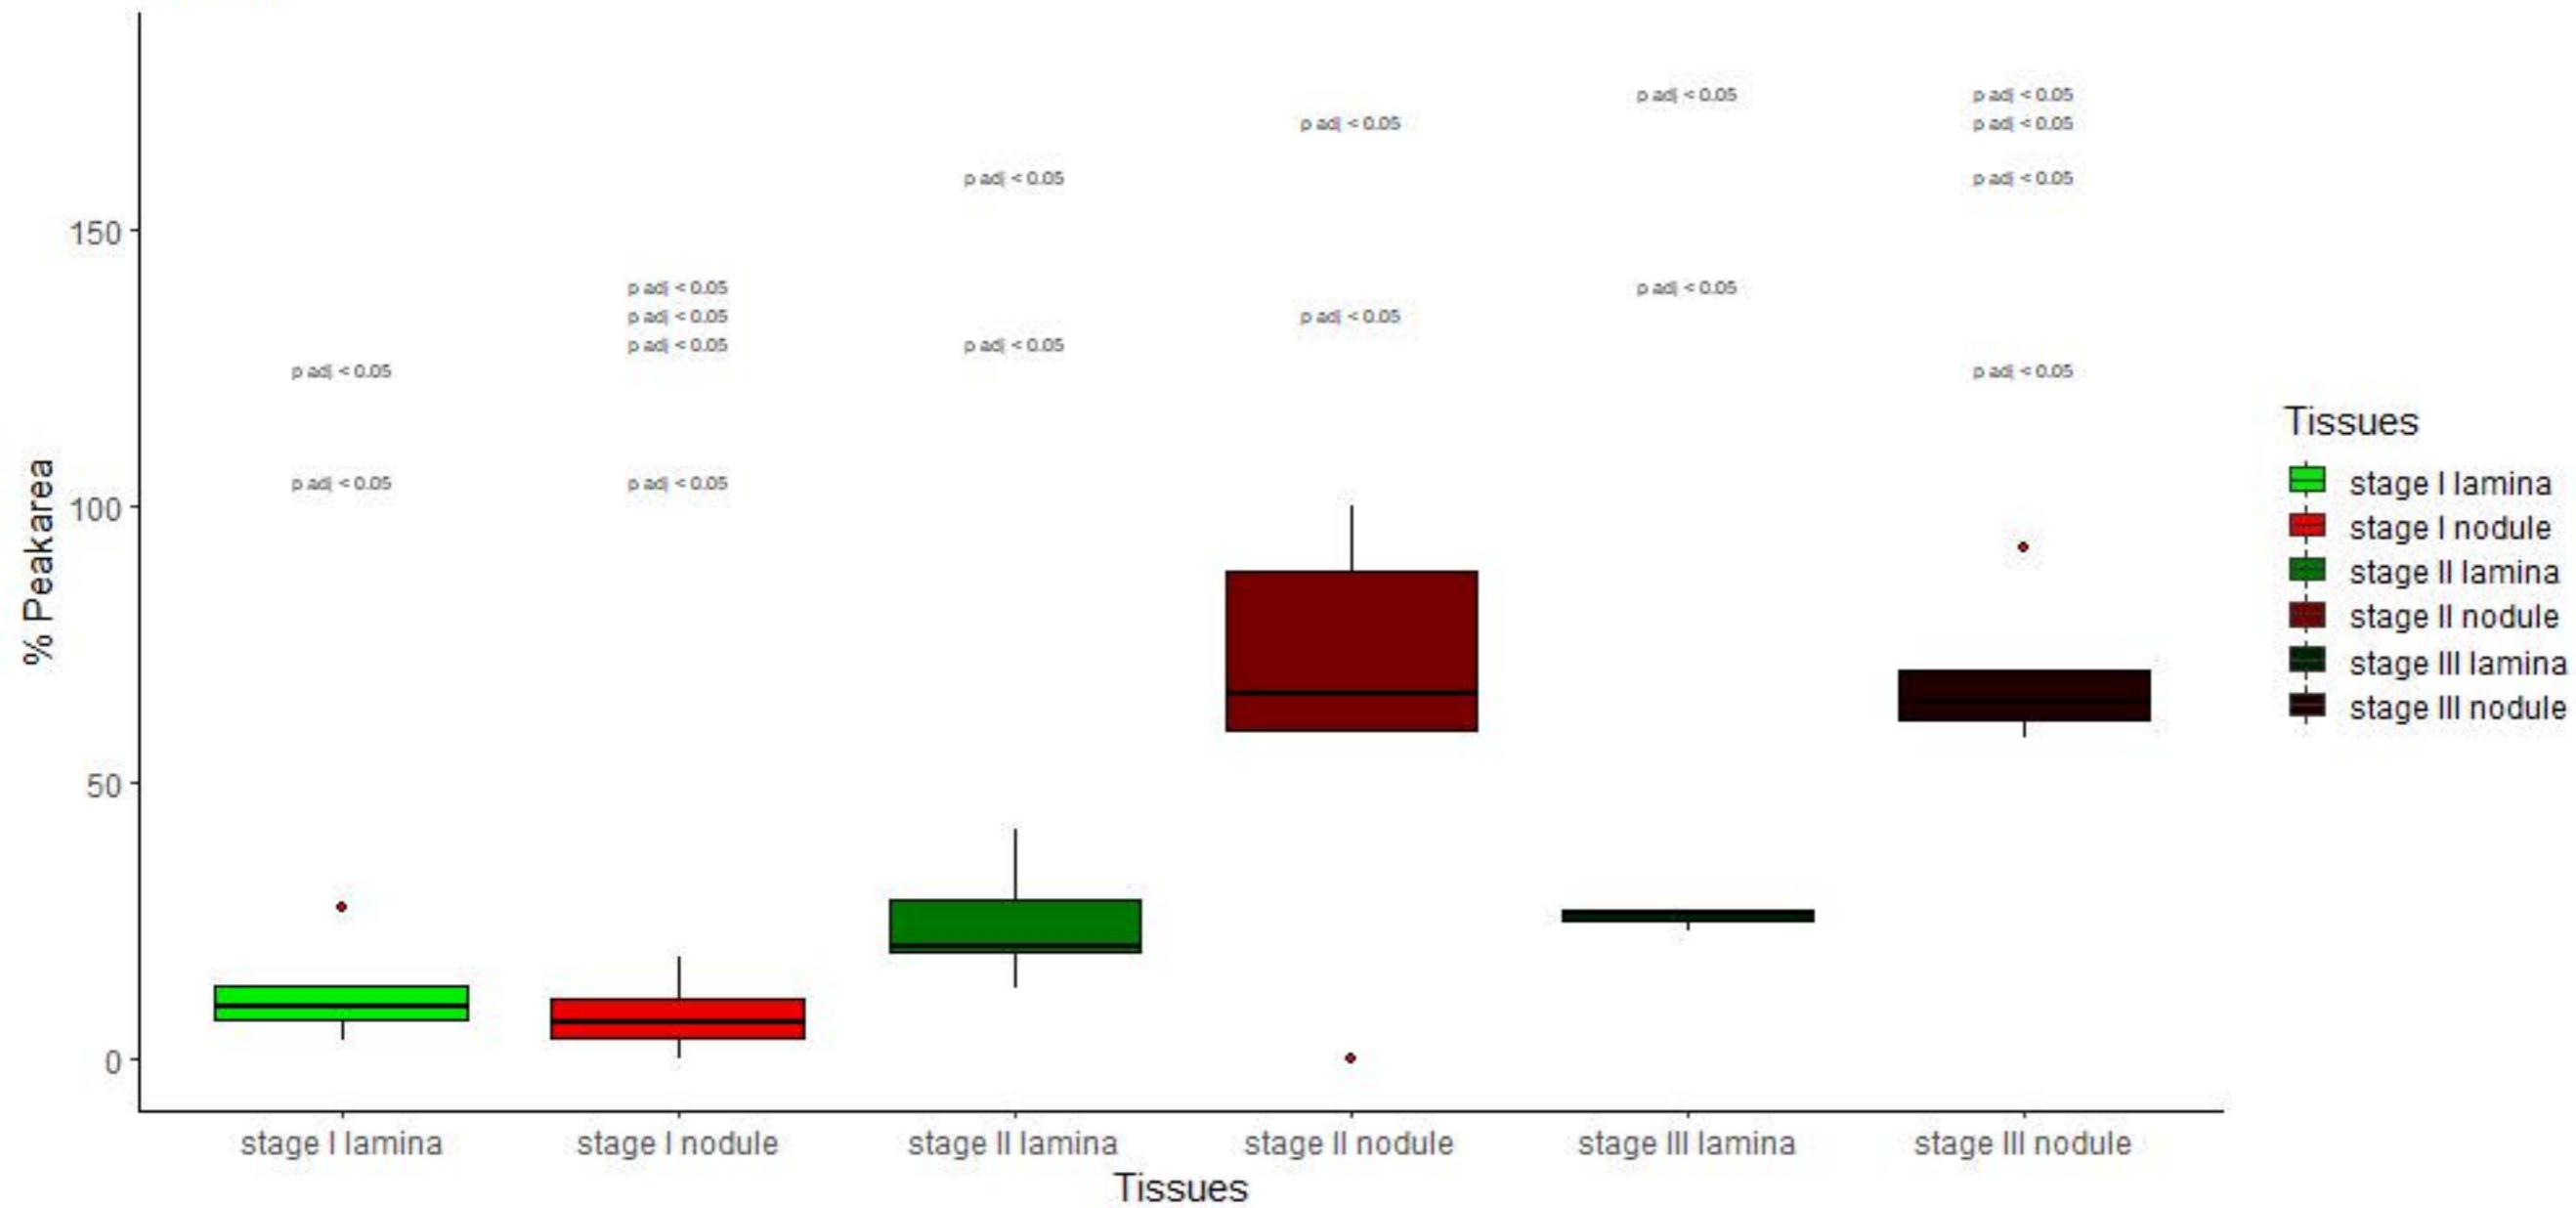

NA 48

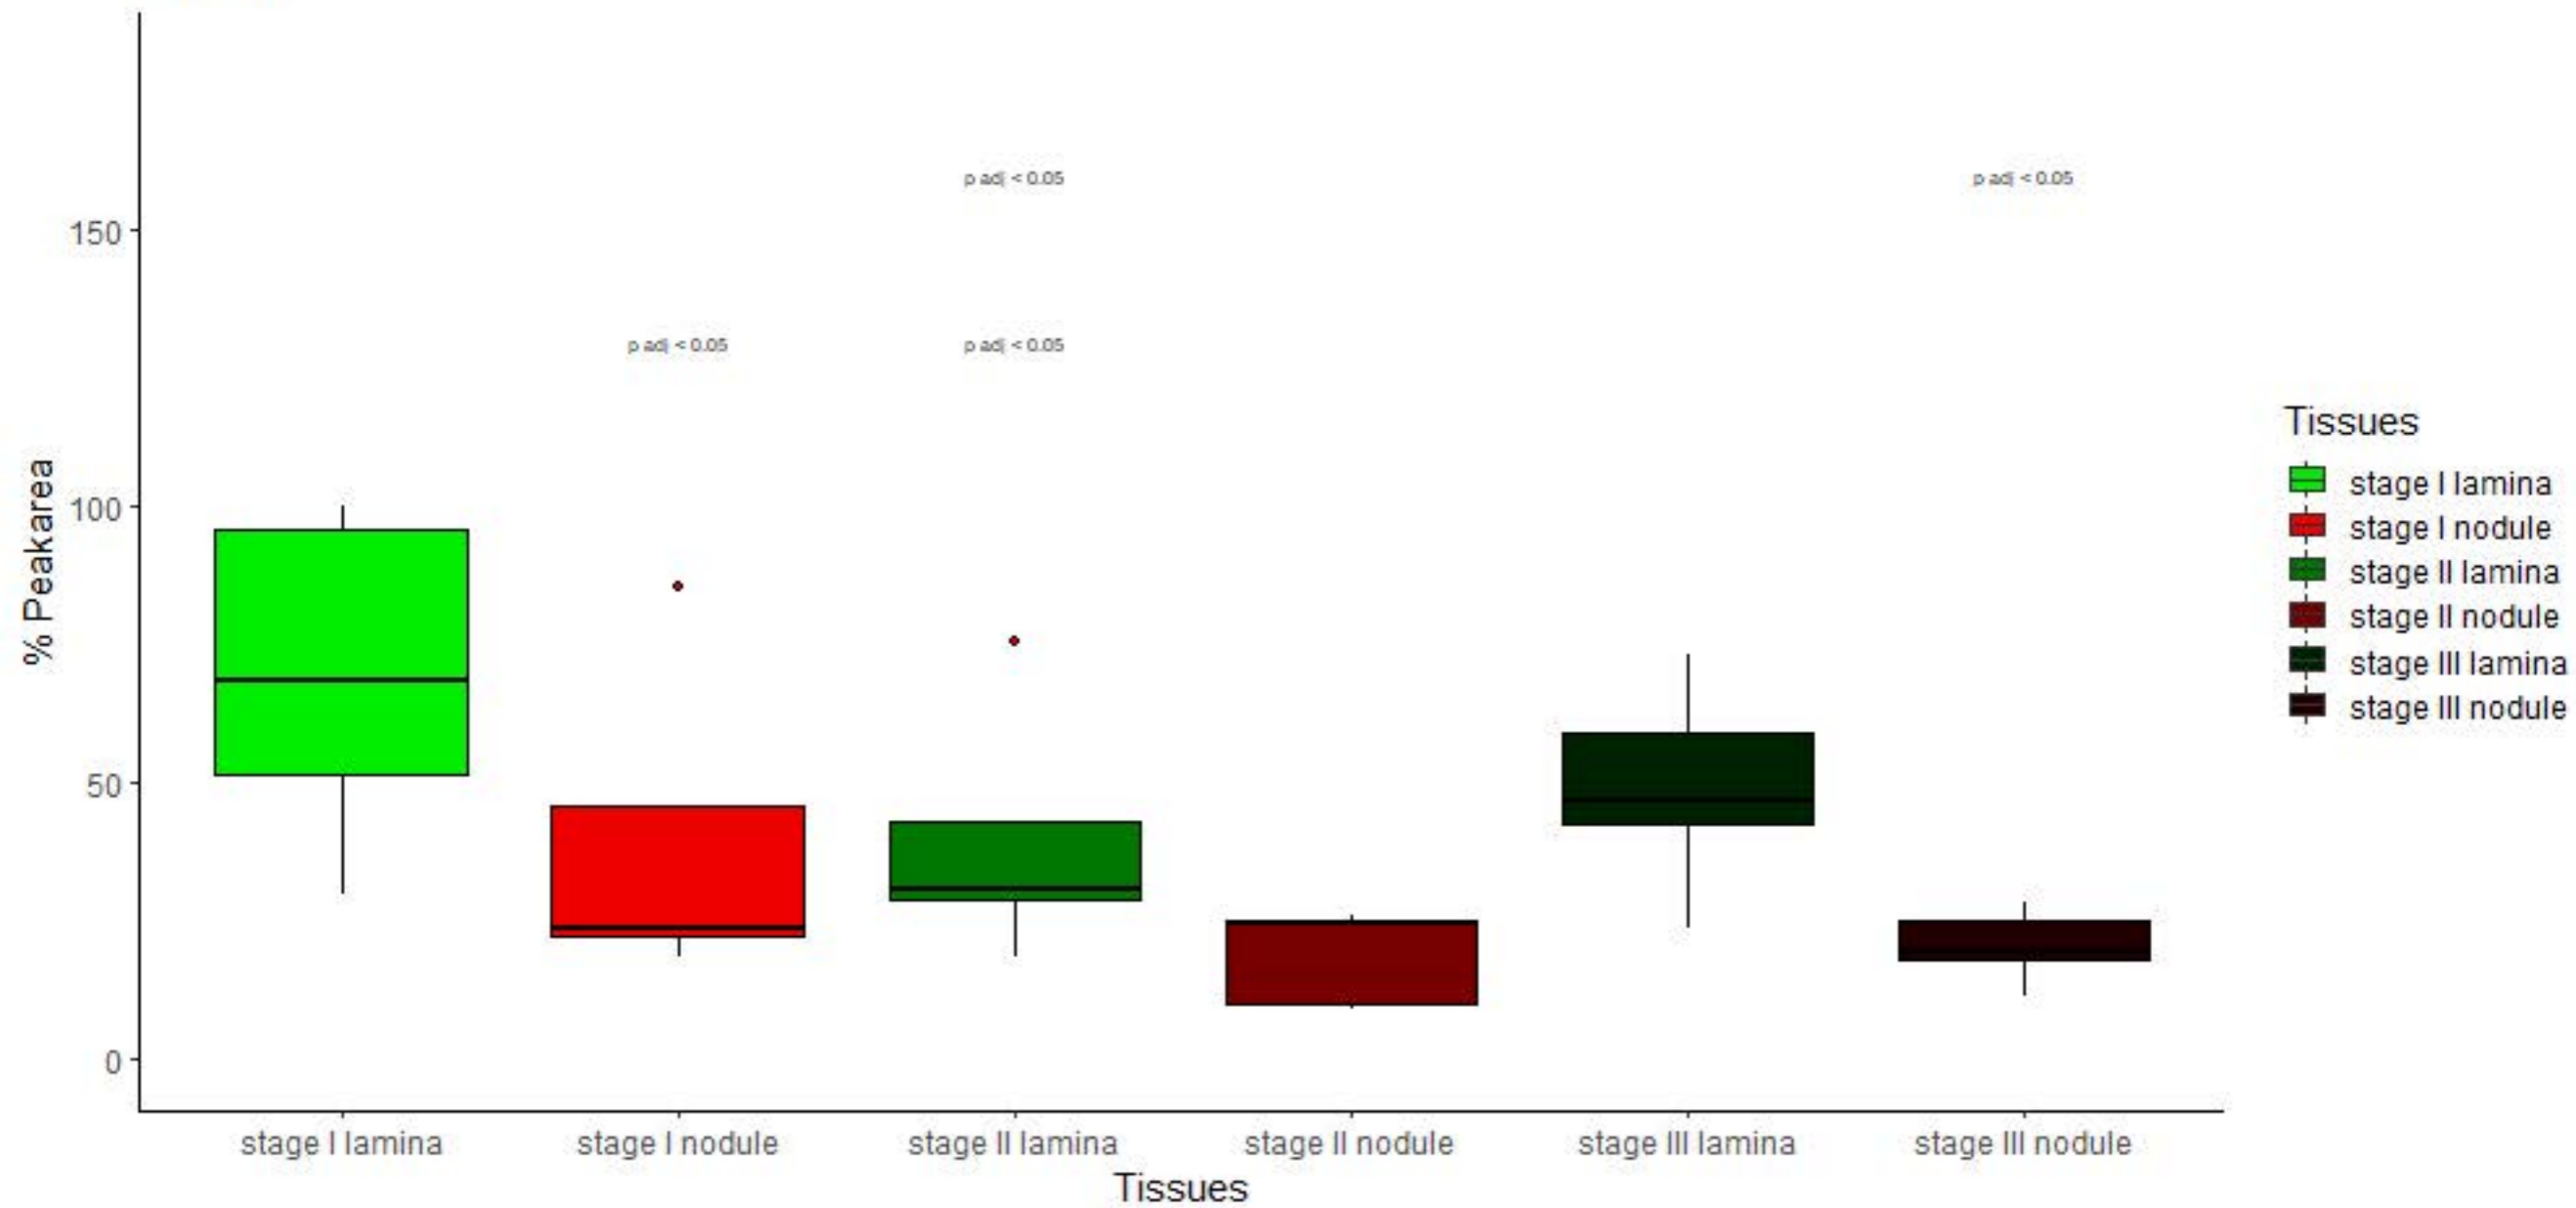



NA 49

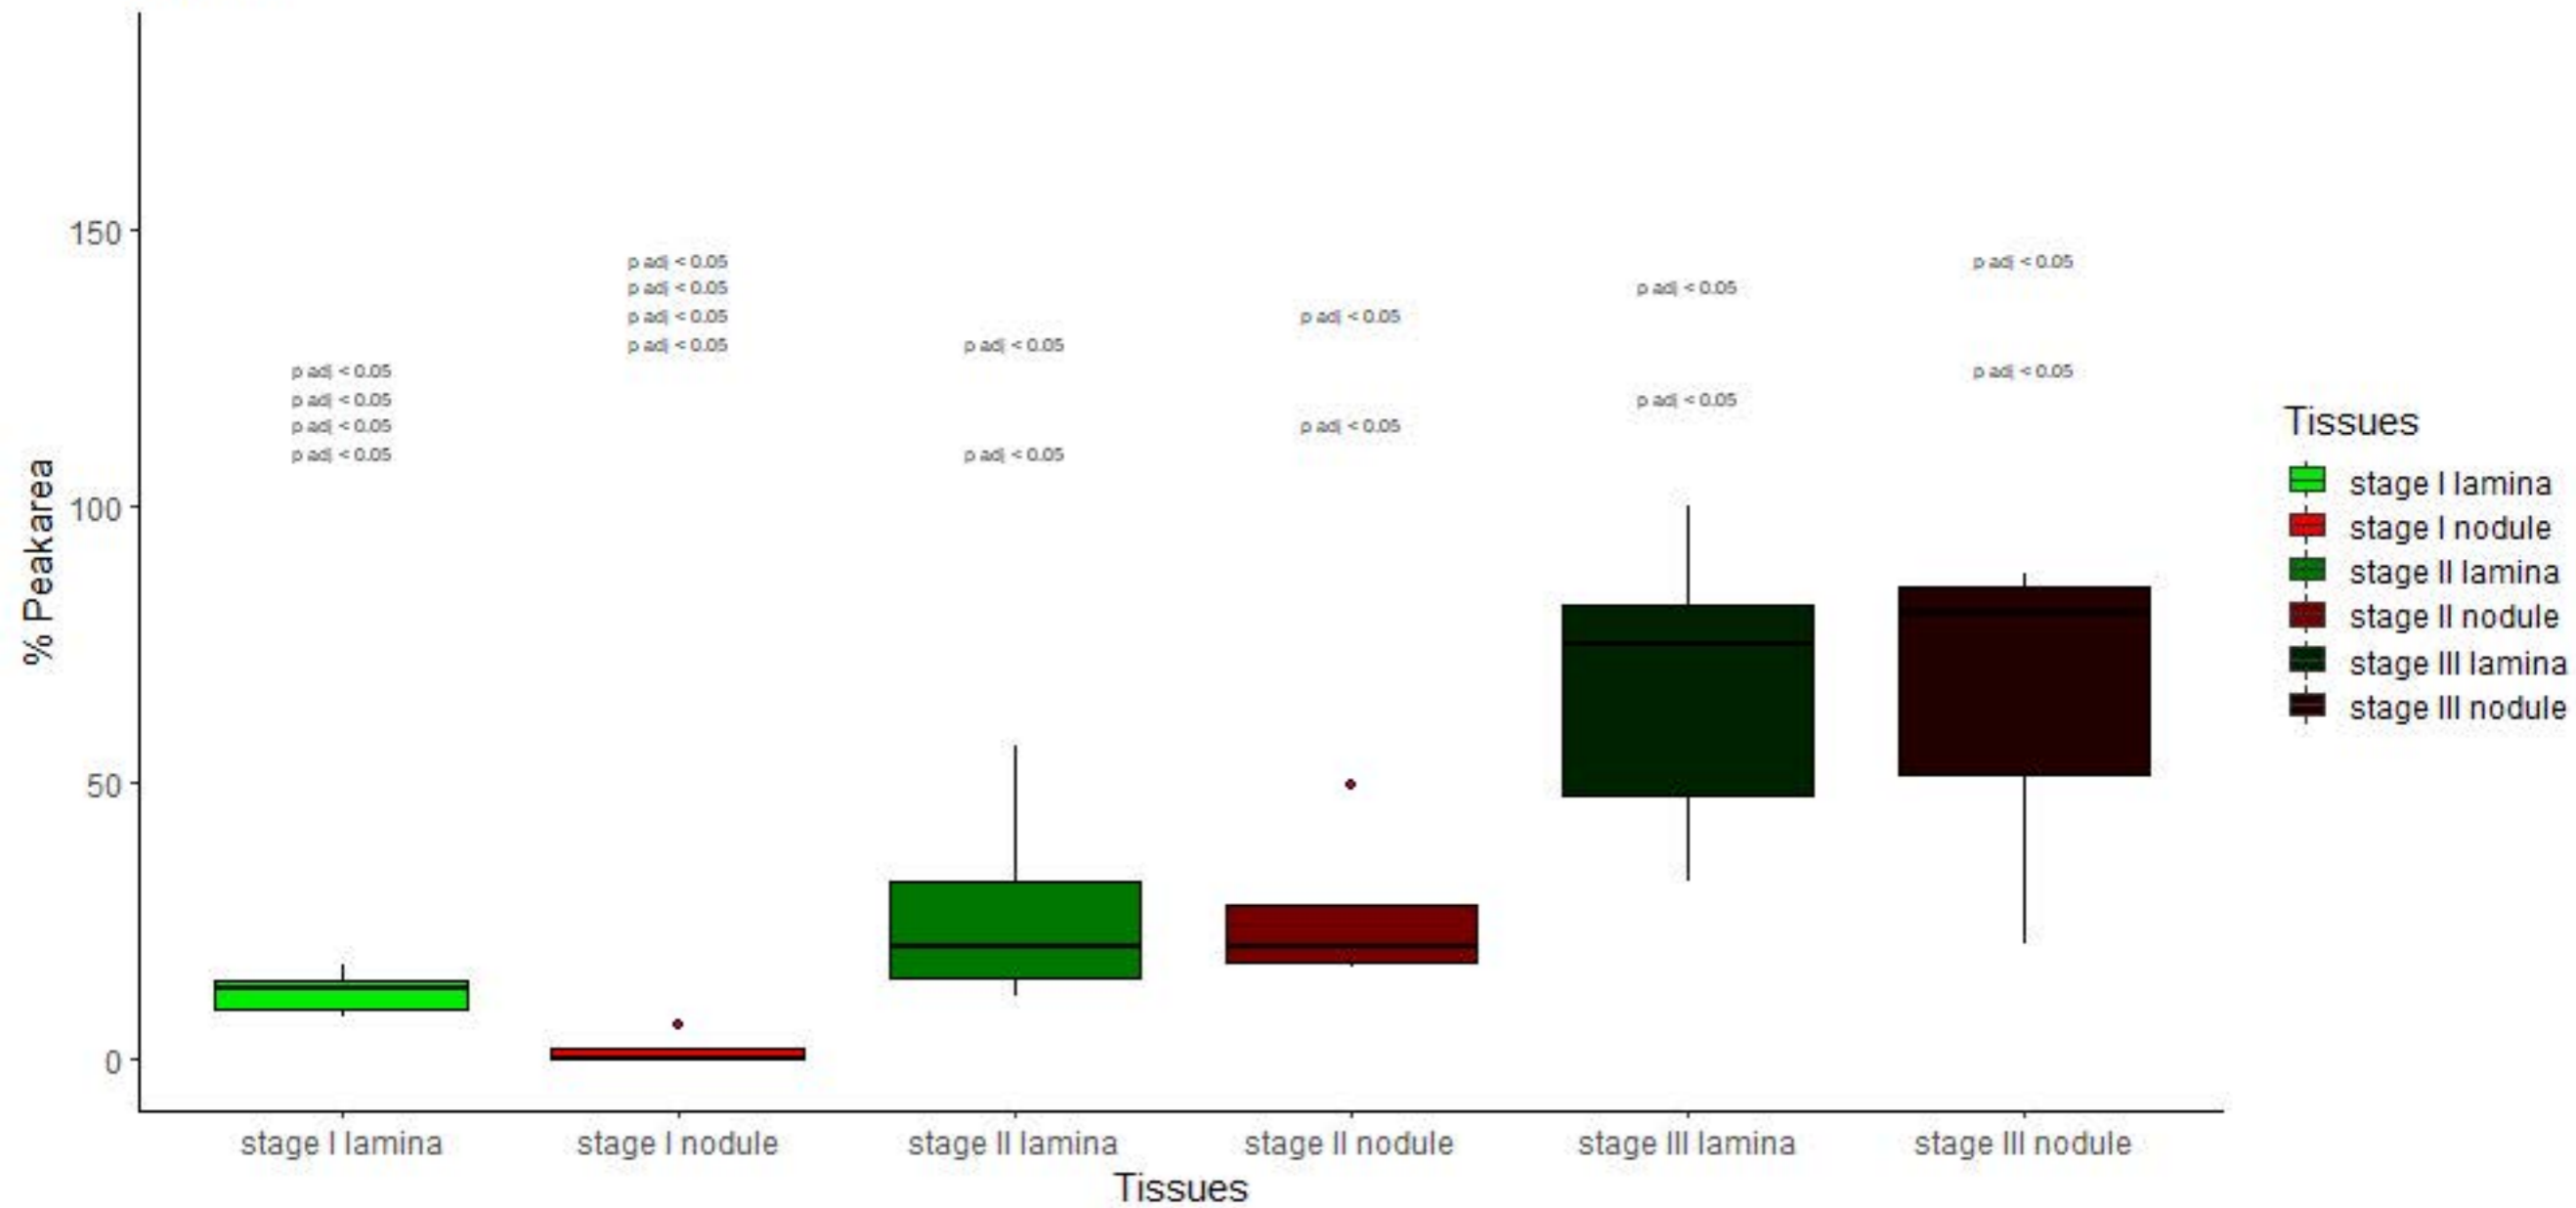

NA 51

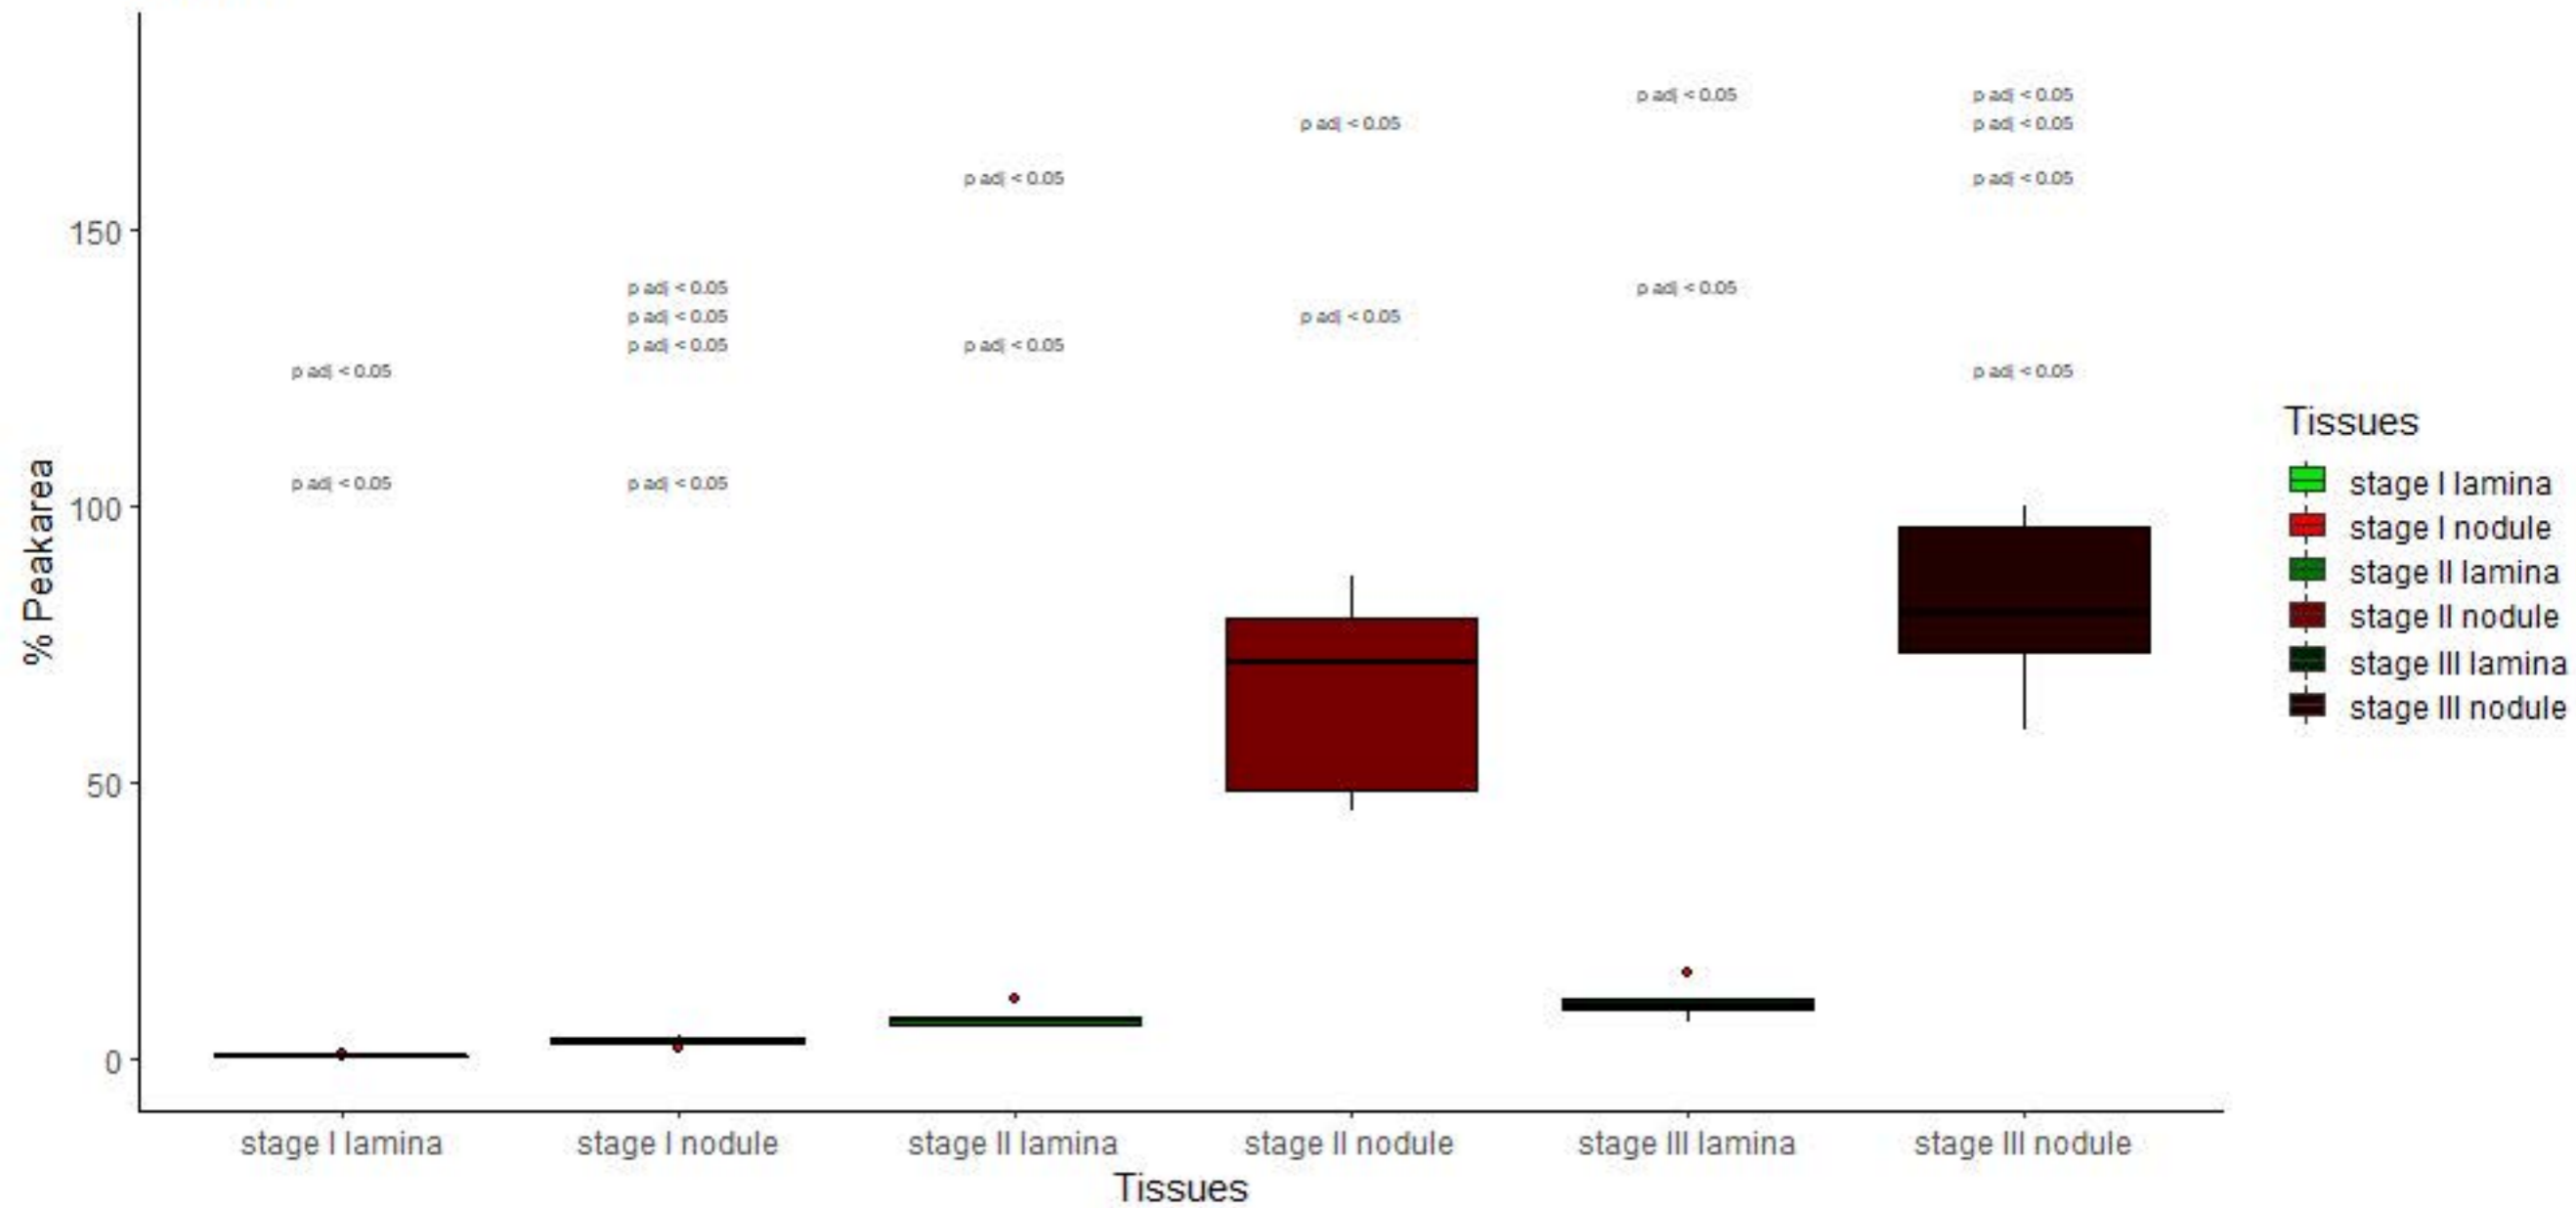

NA 6

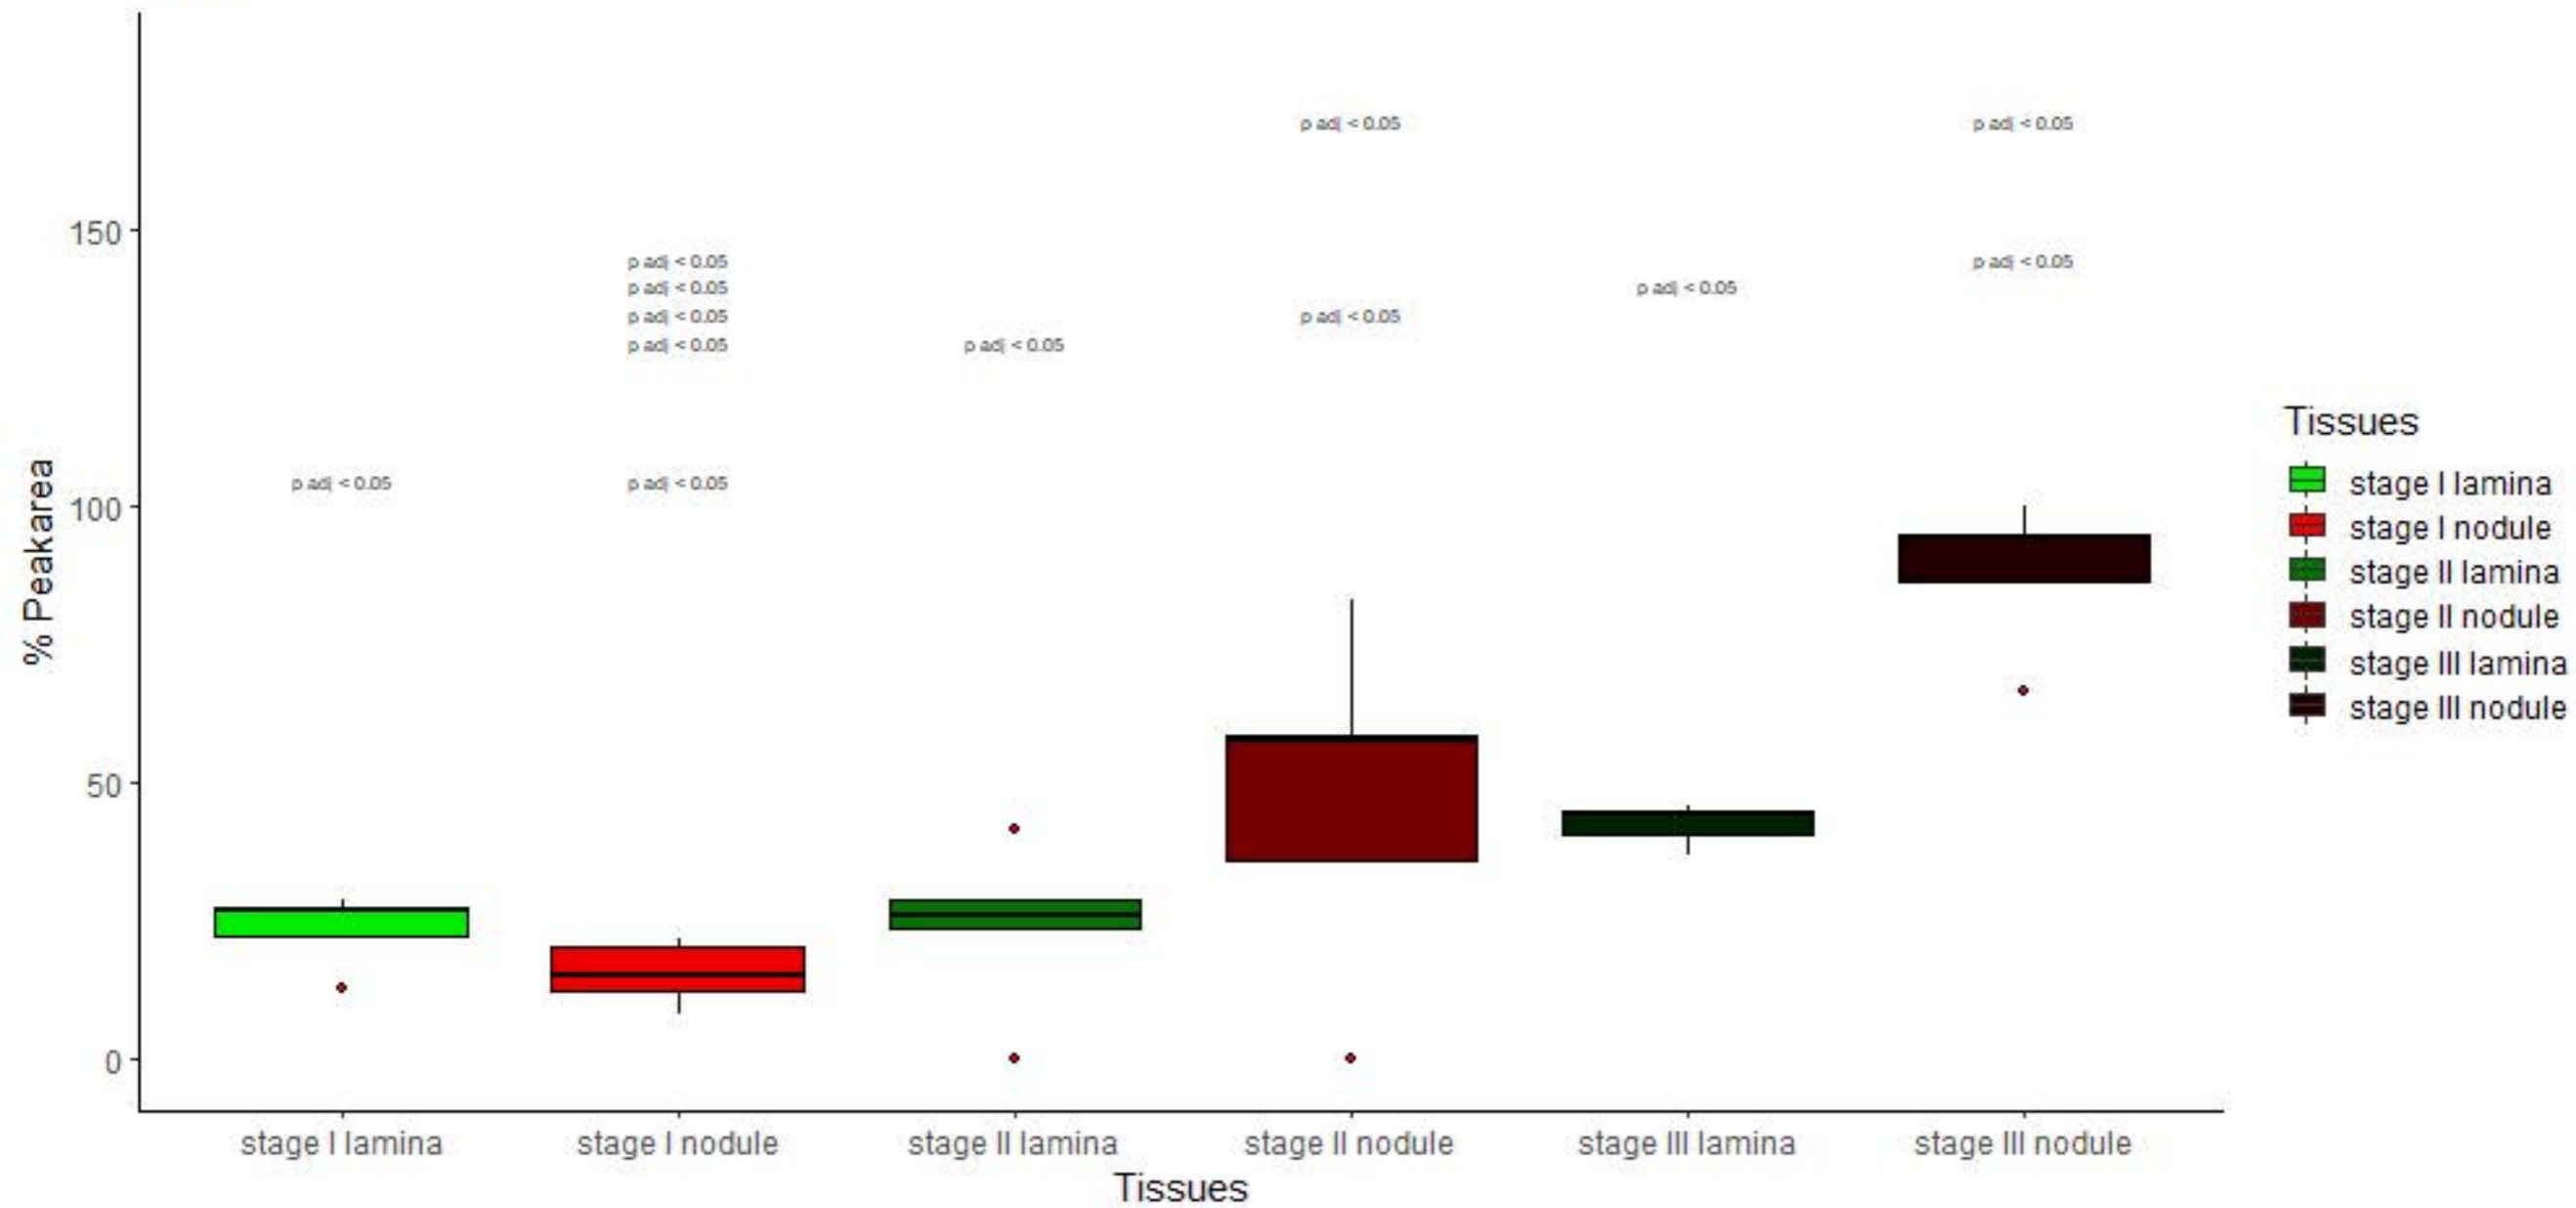

NA 67

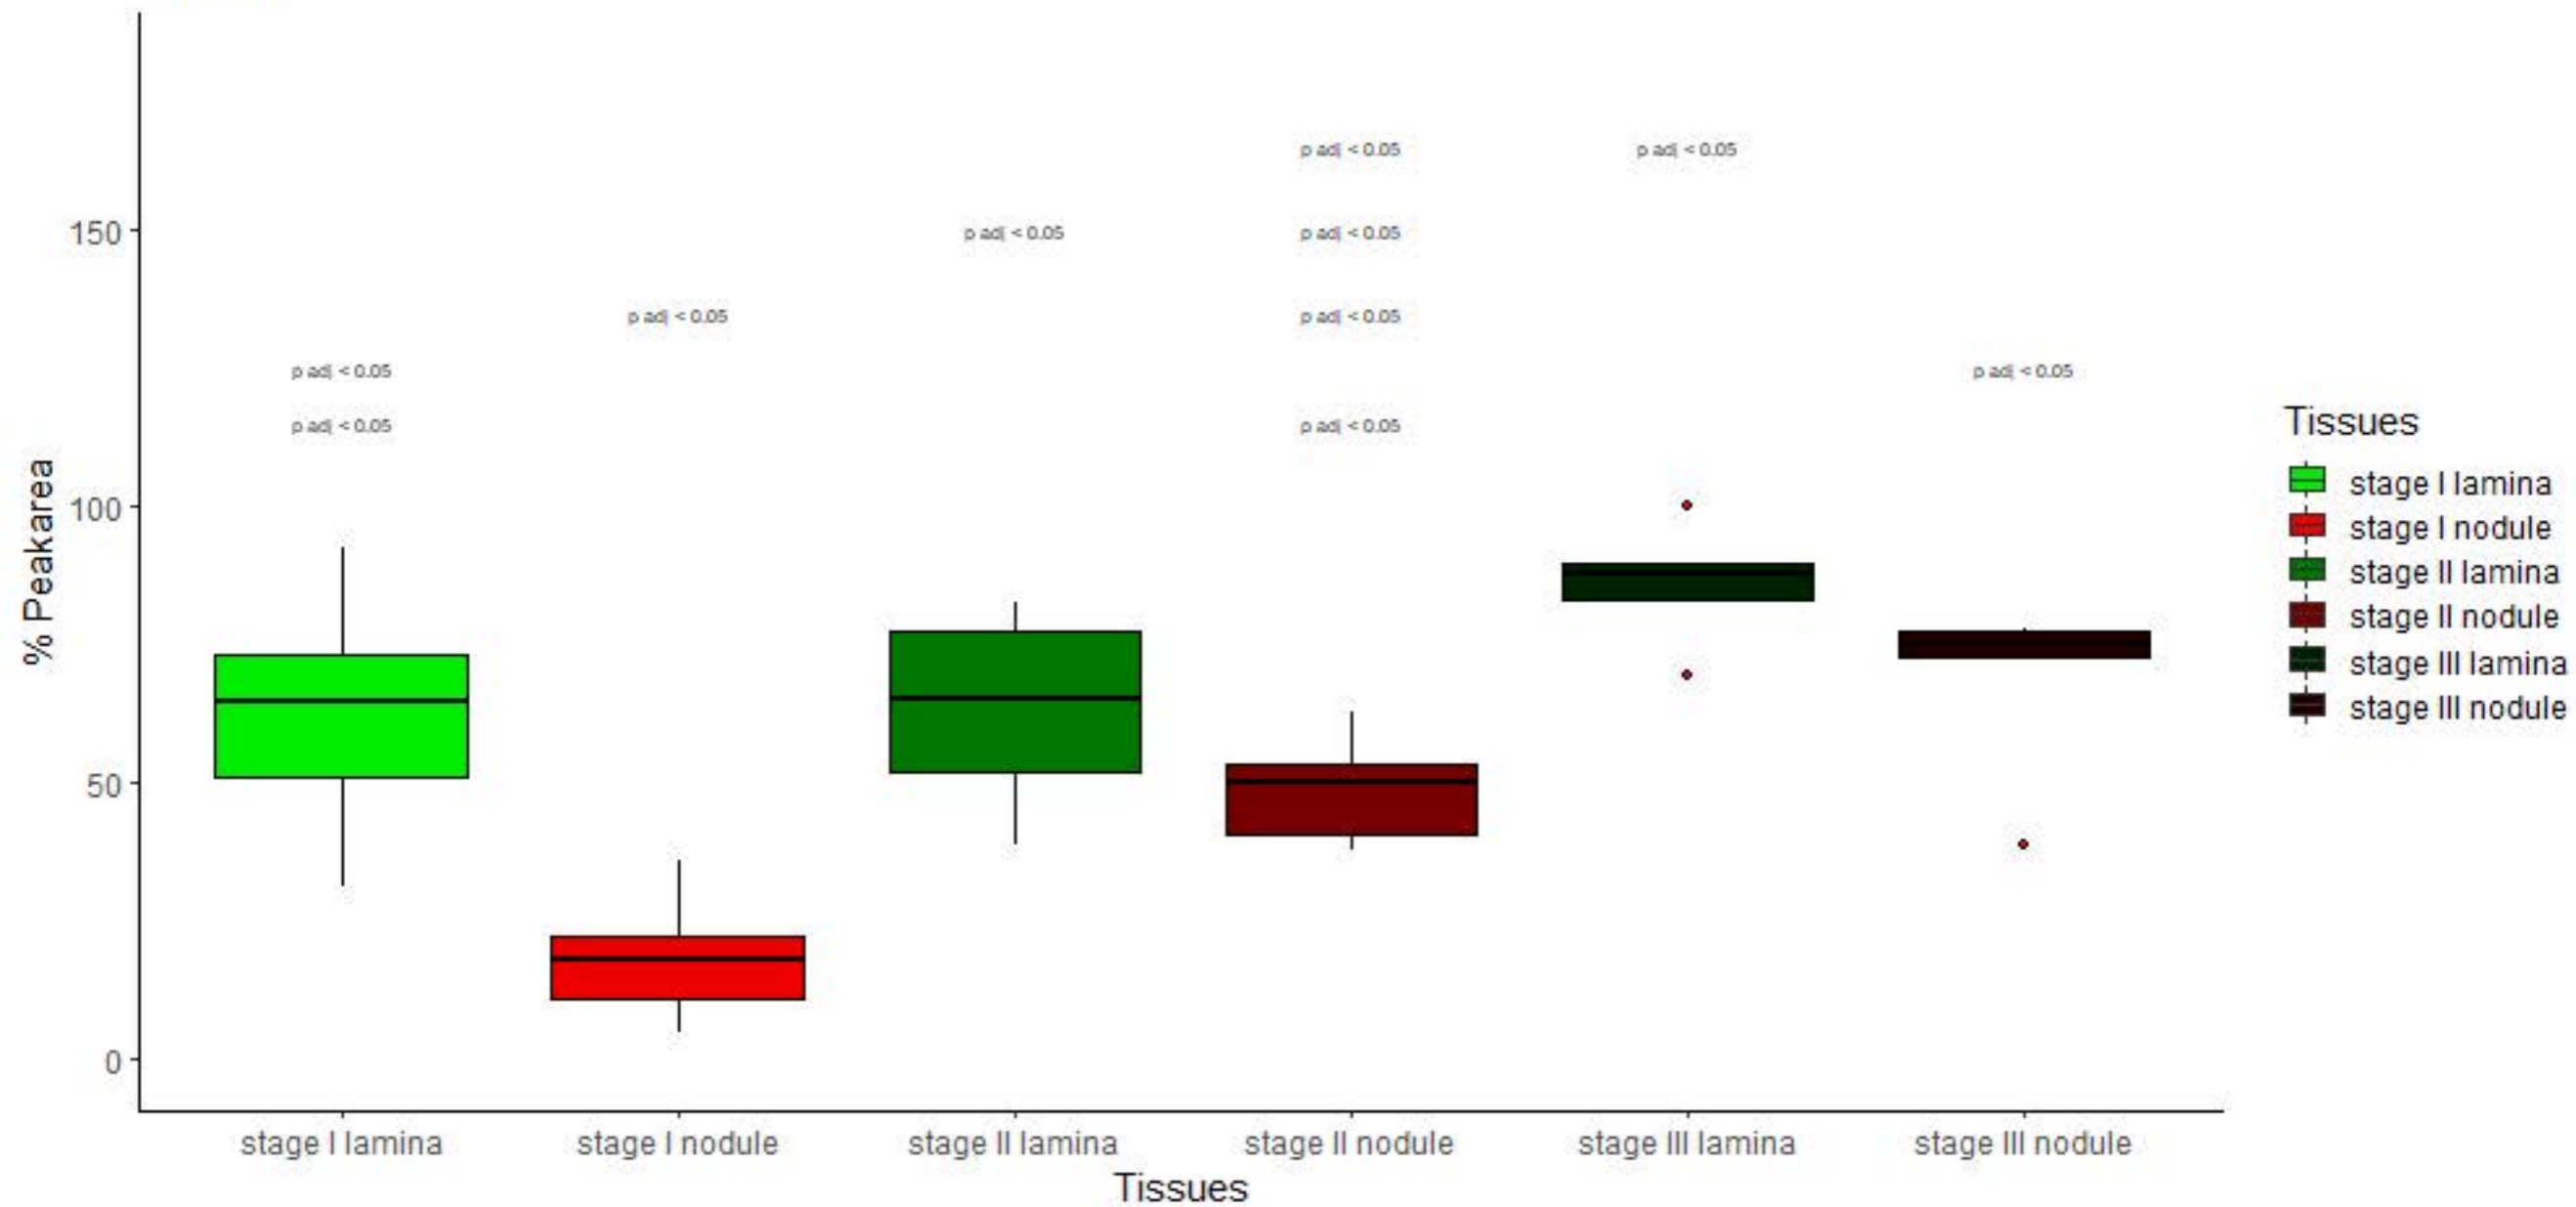

NA 68

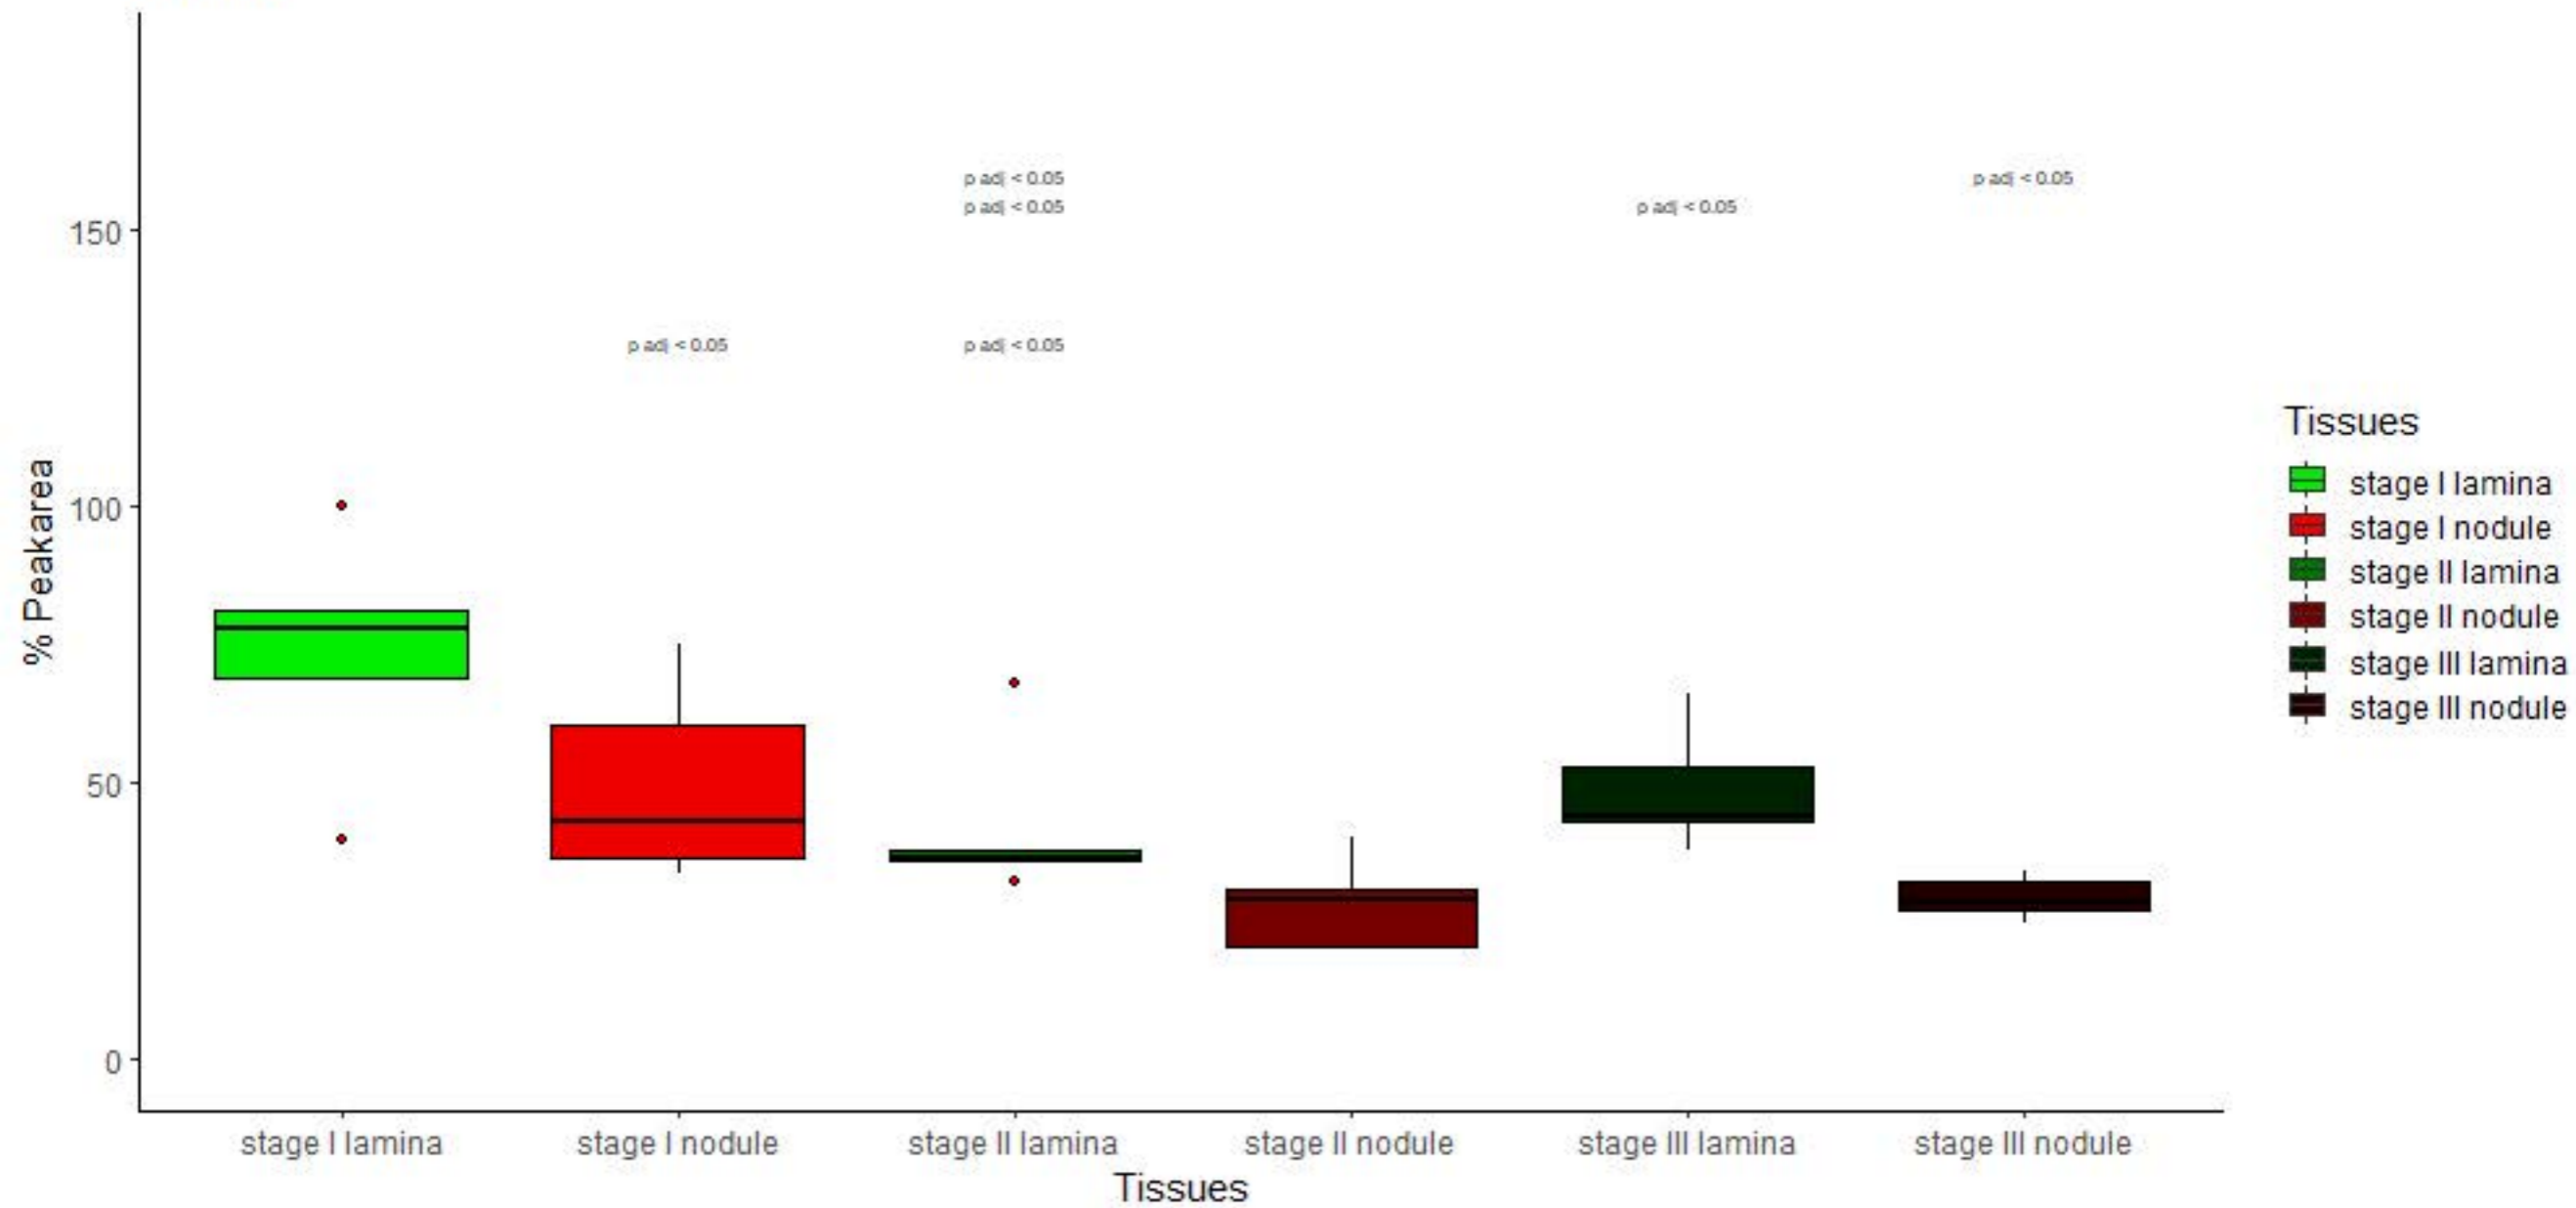

NA 80

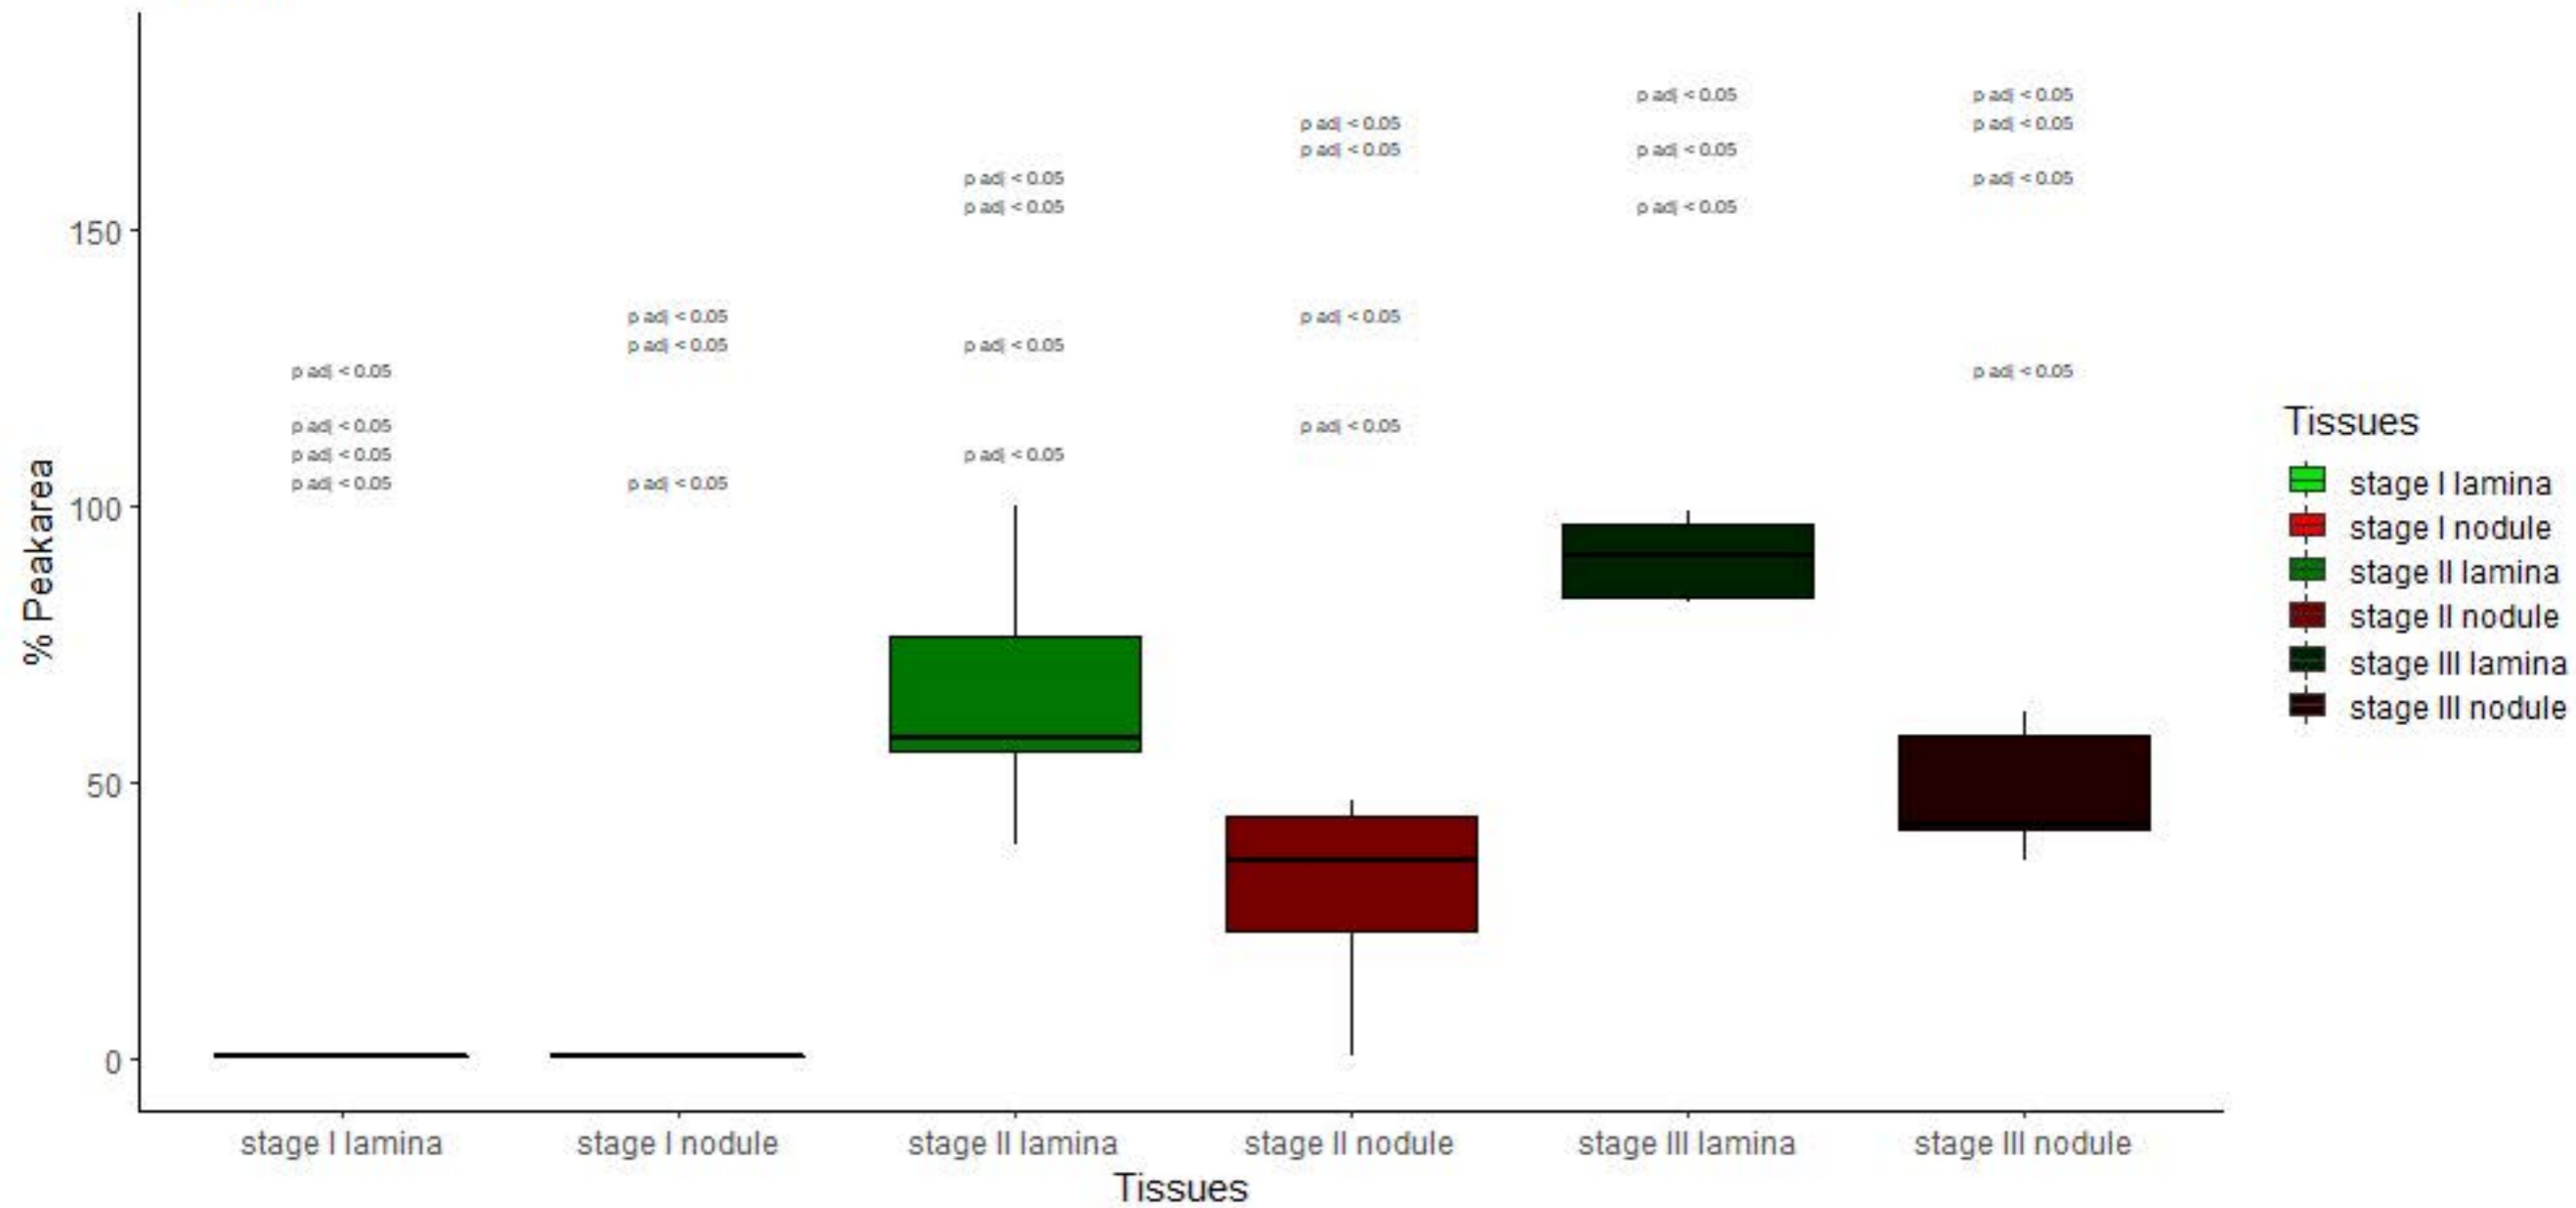

NA 82

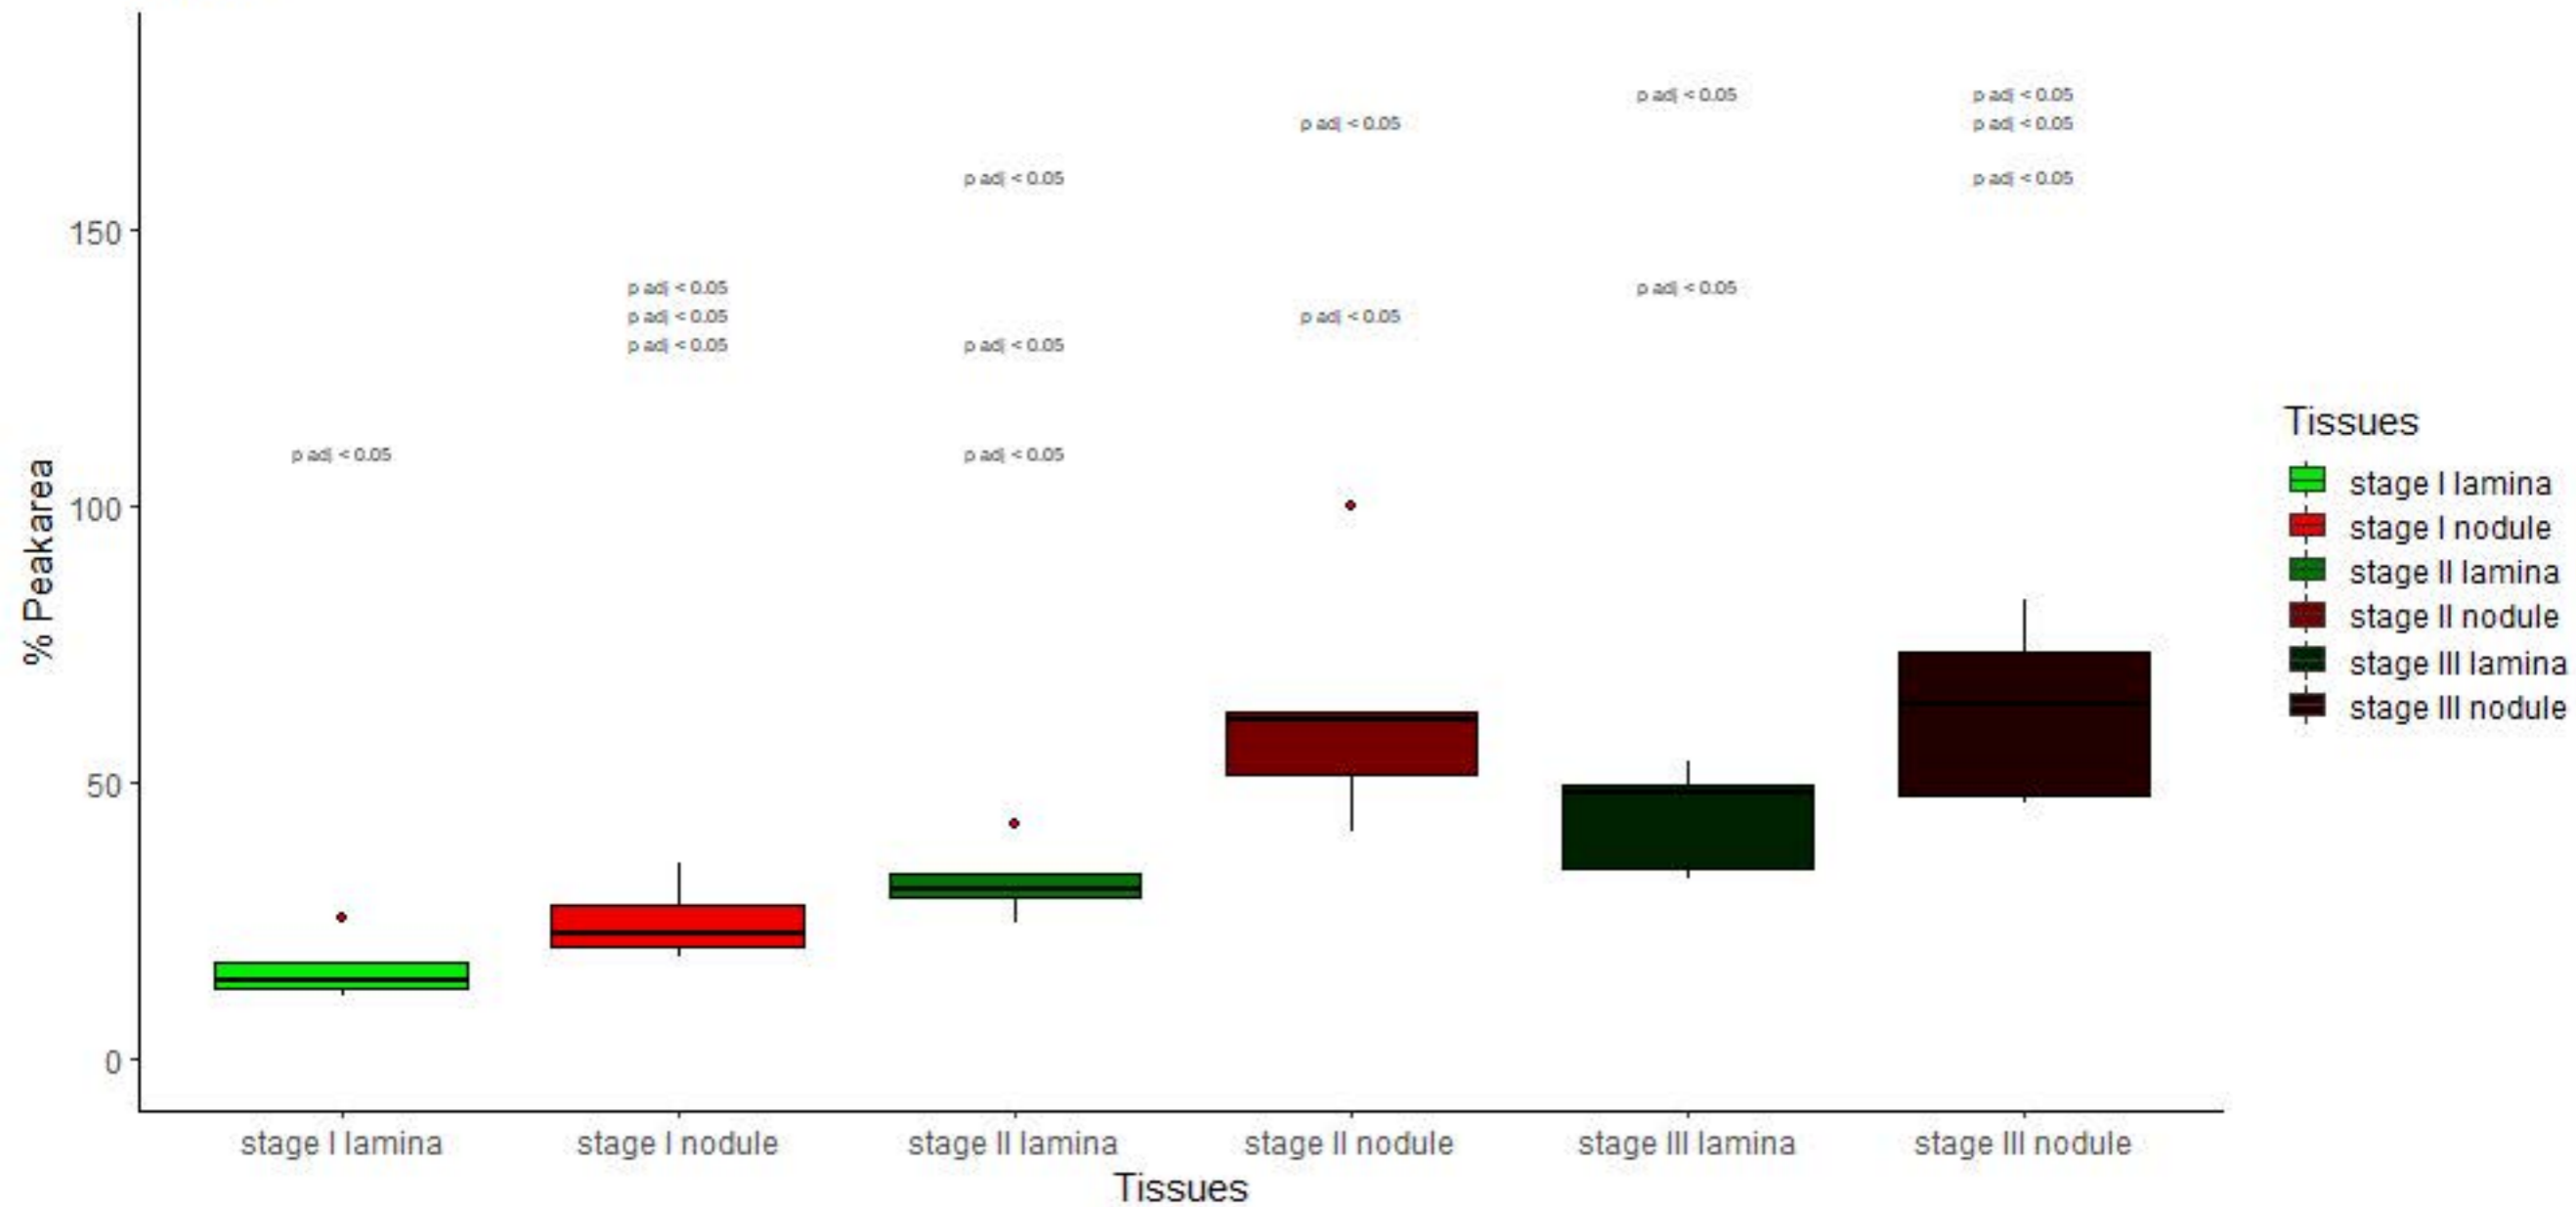

NA 84

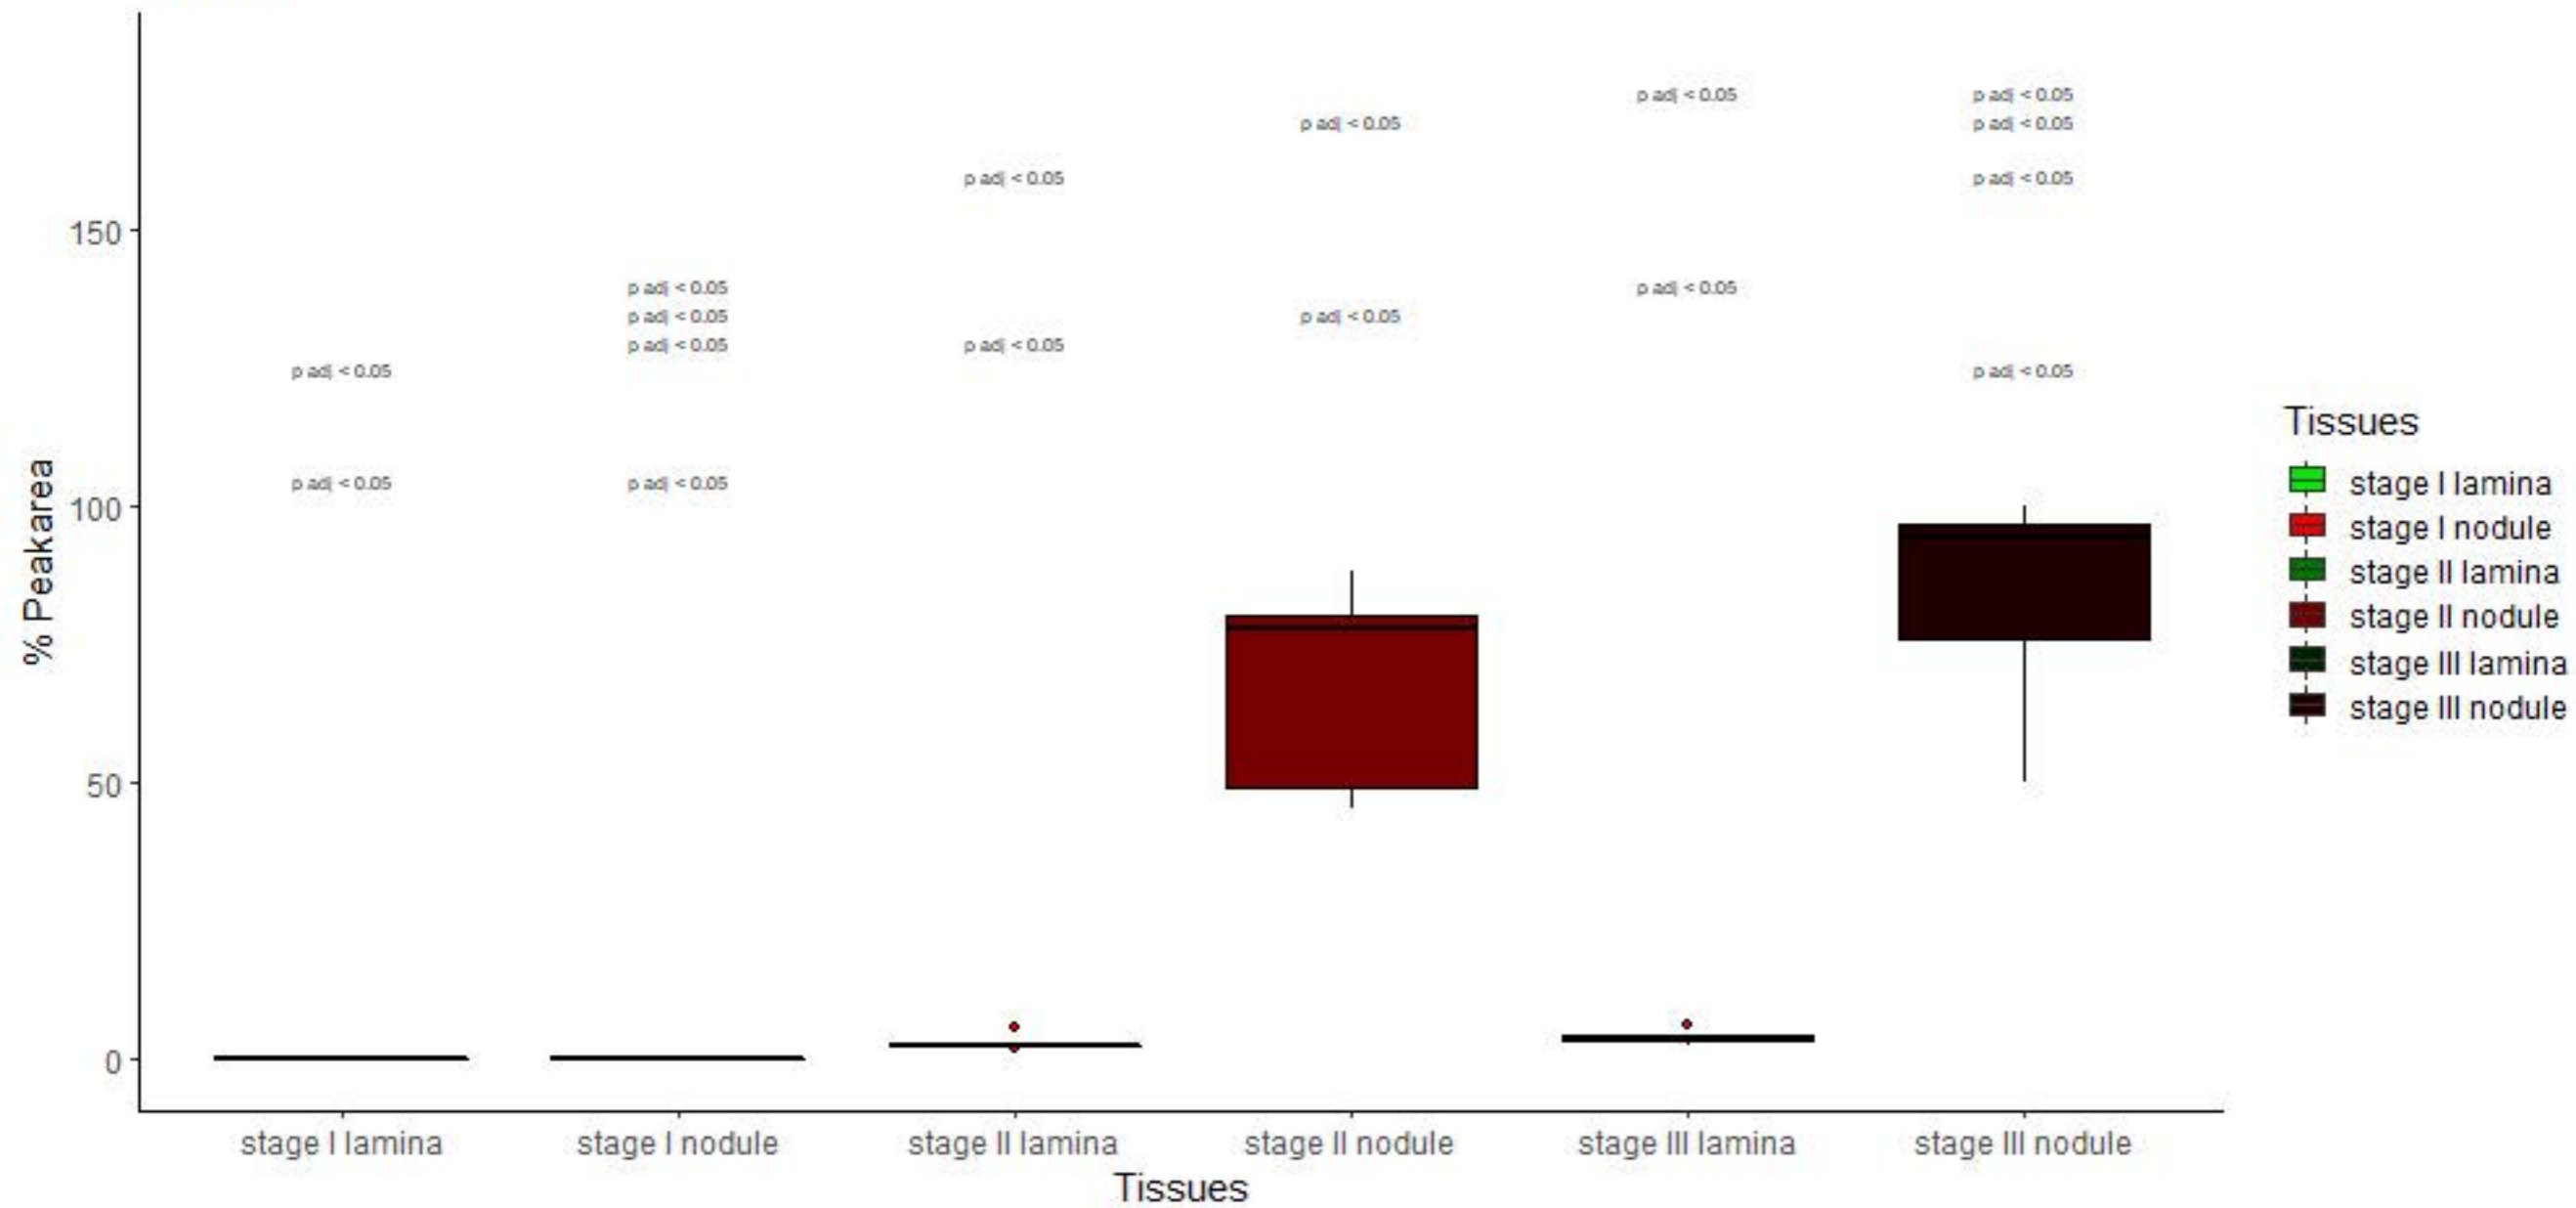



NA 90

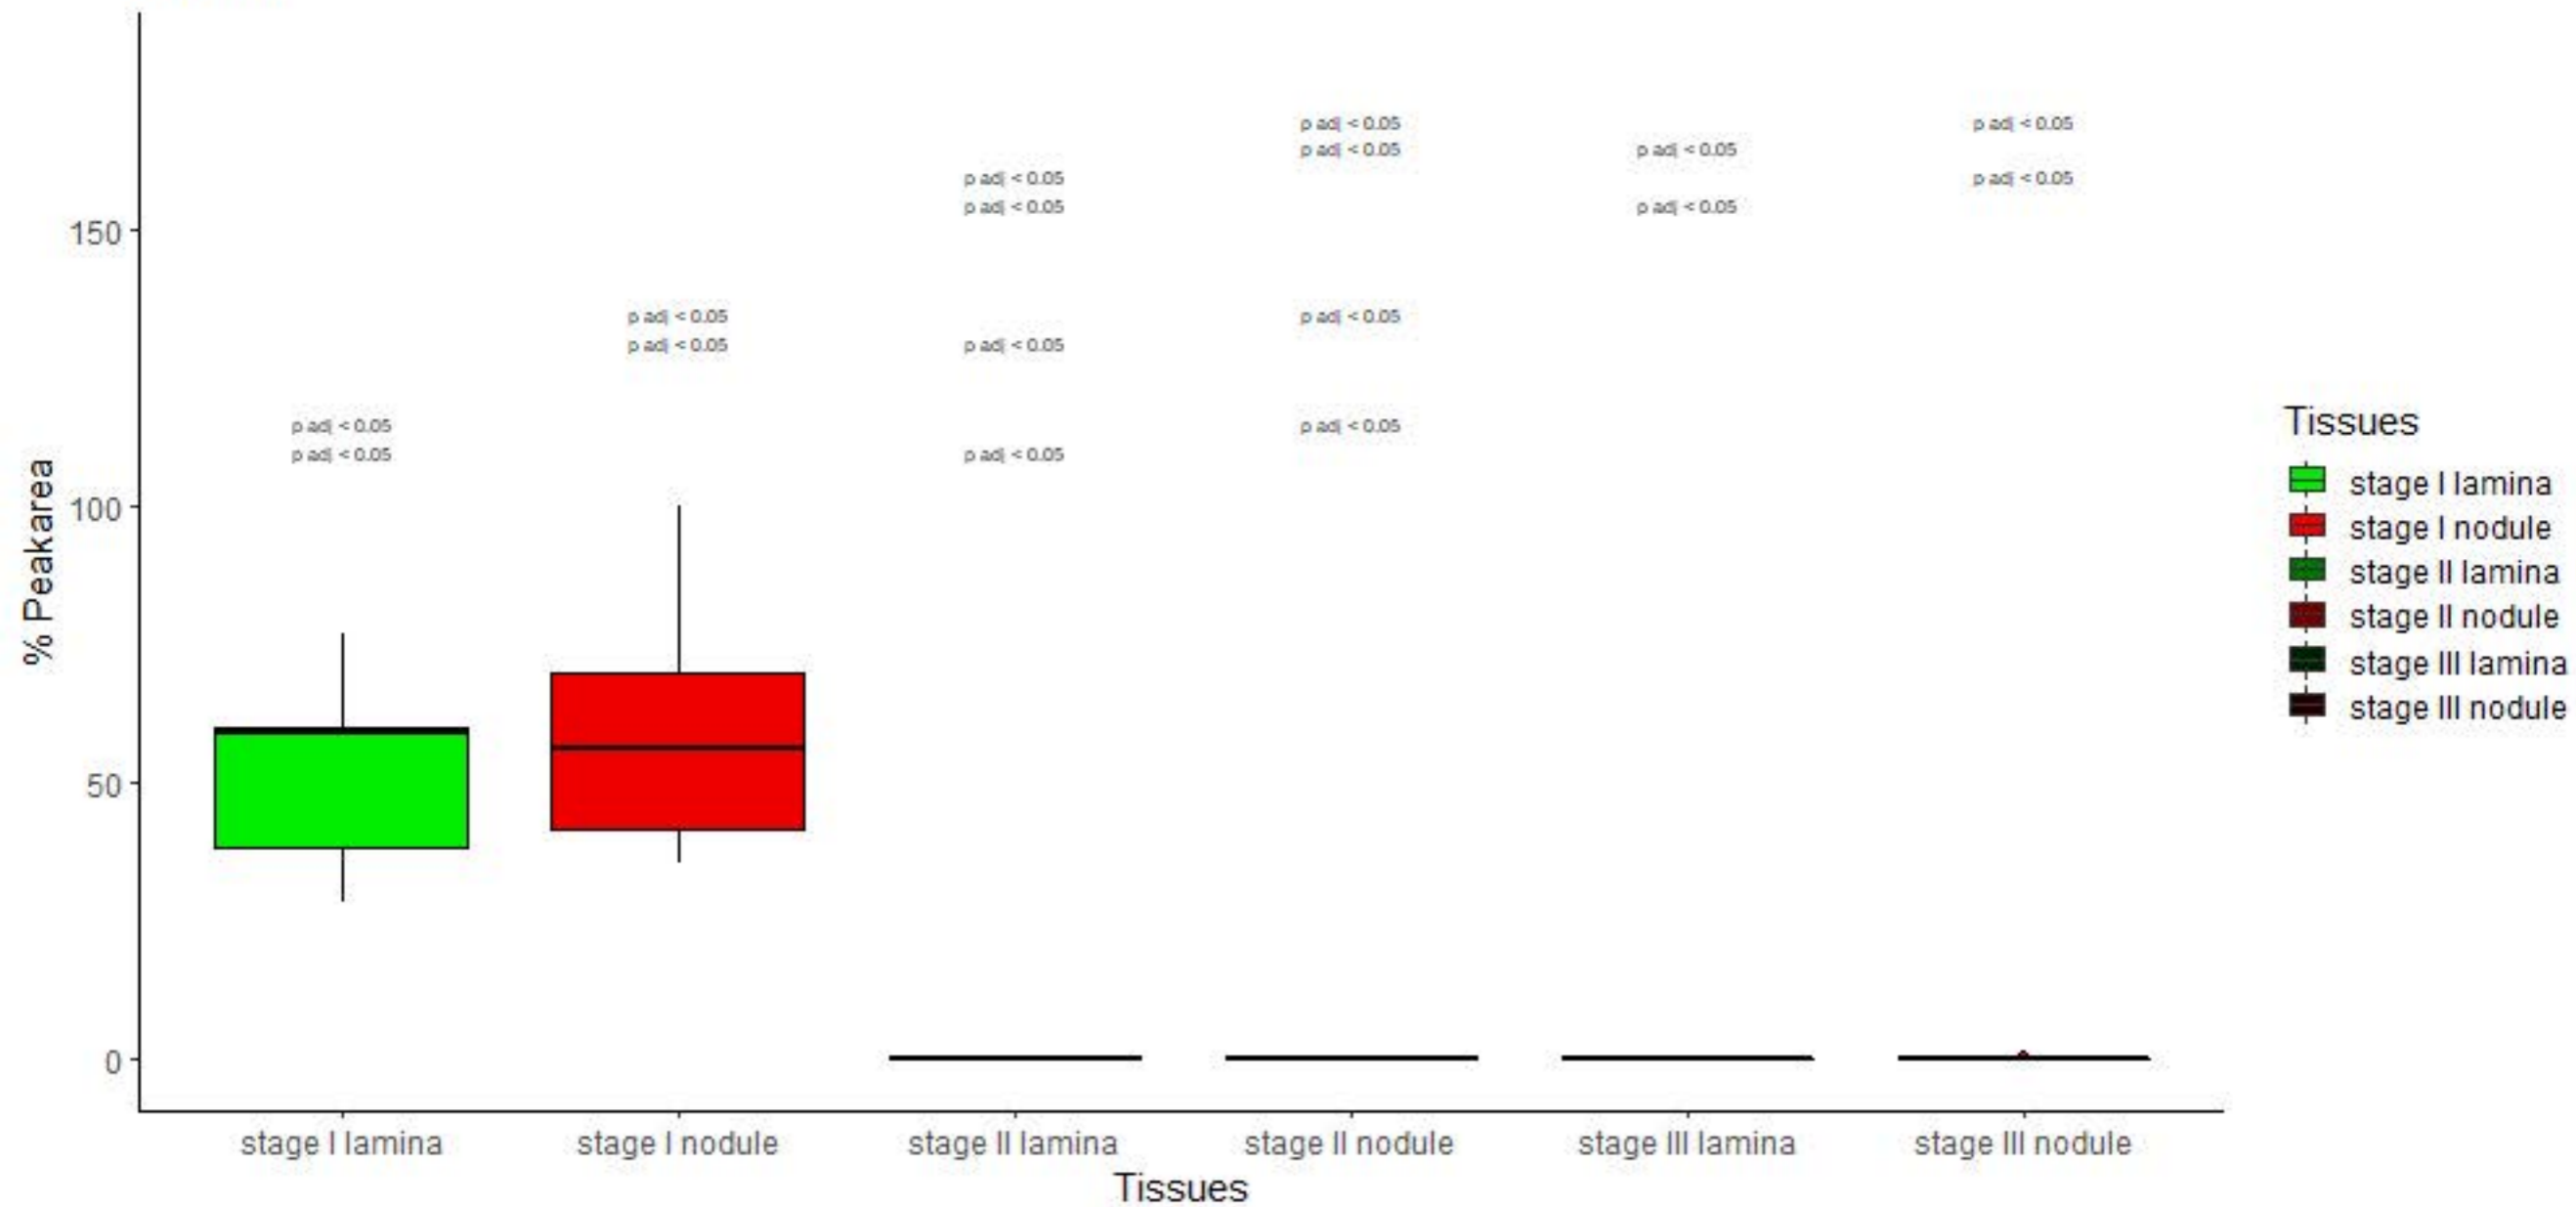

NA 92

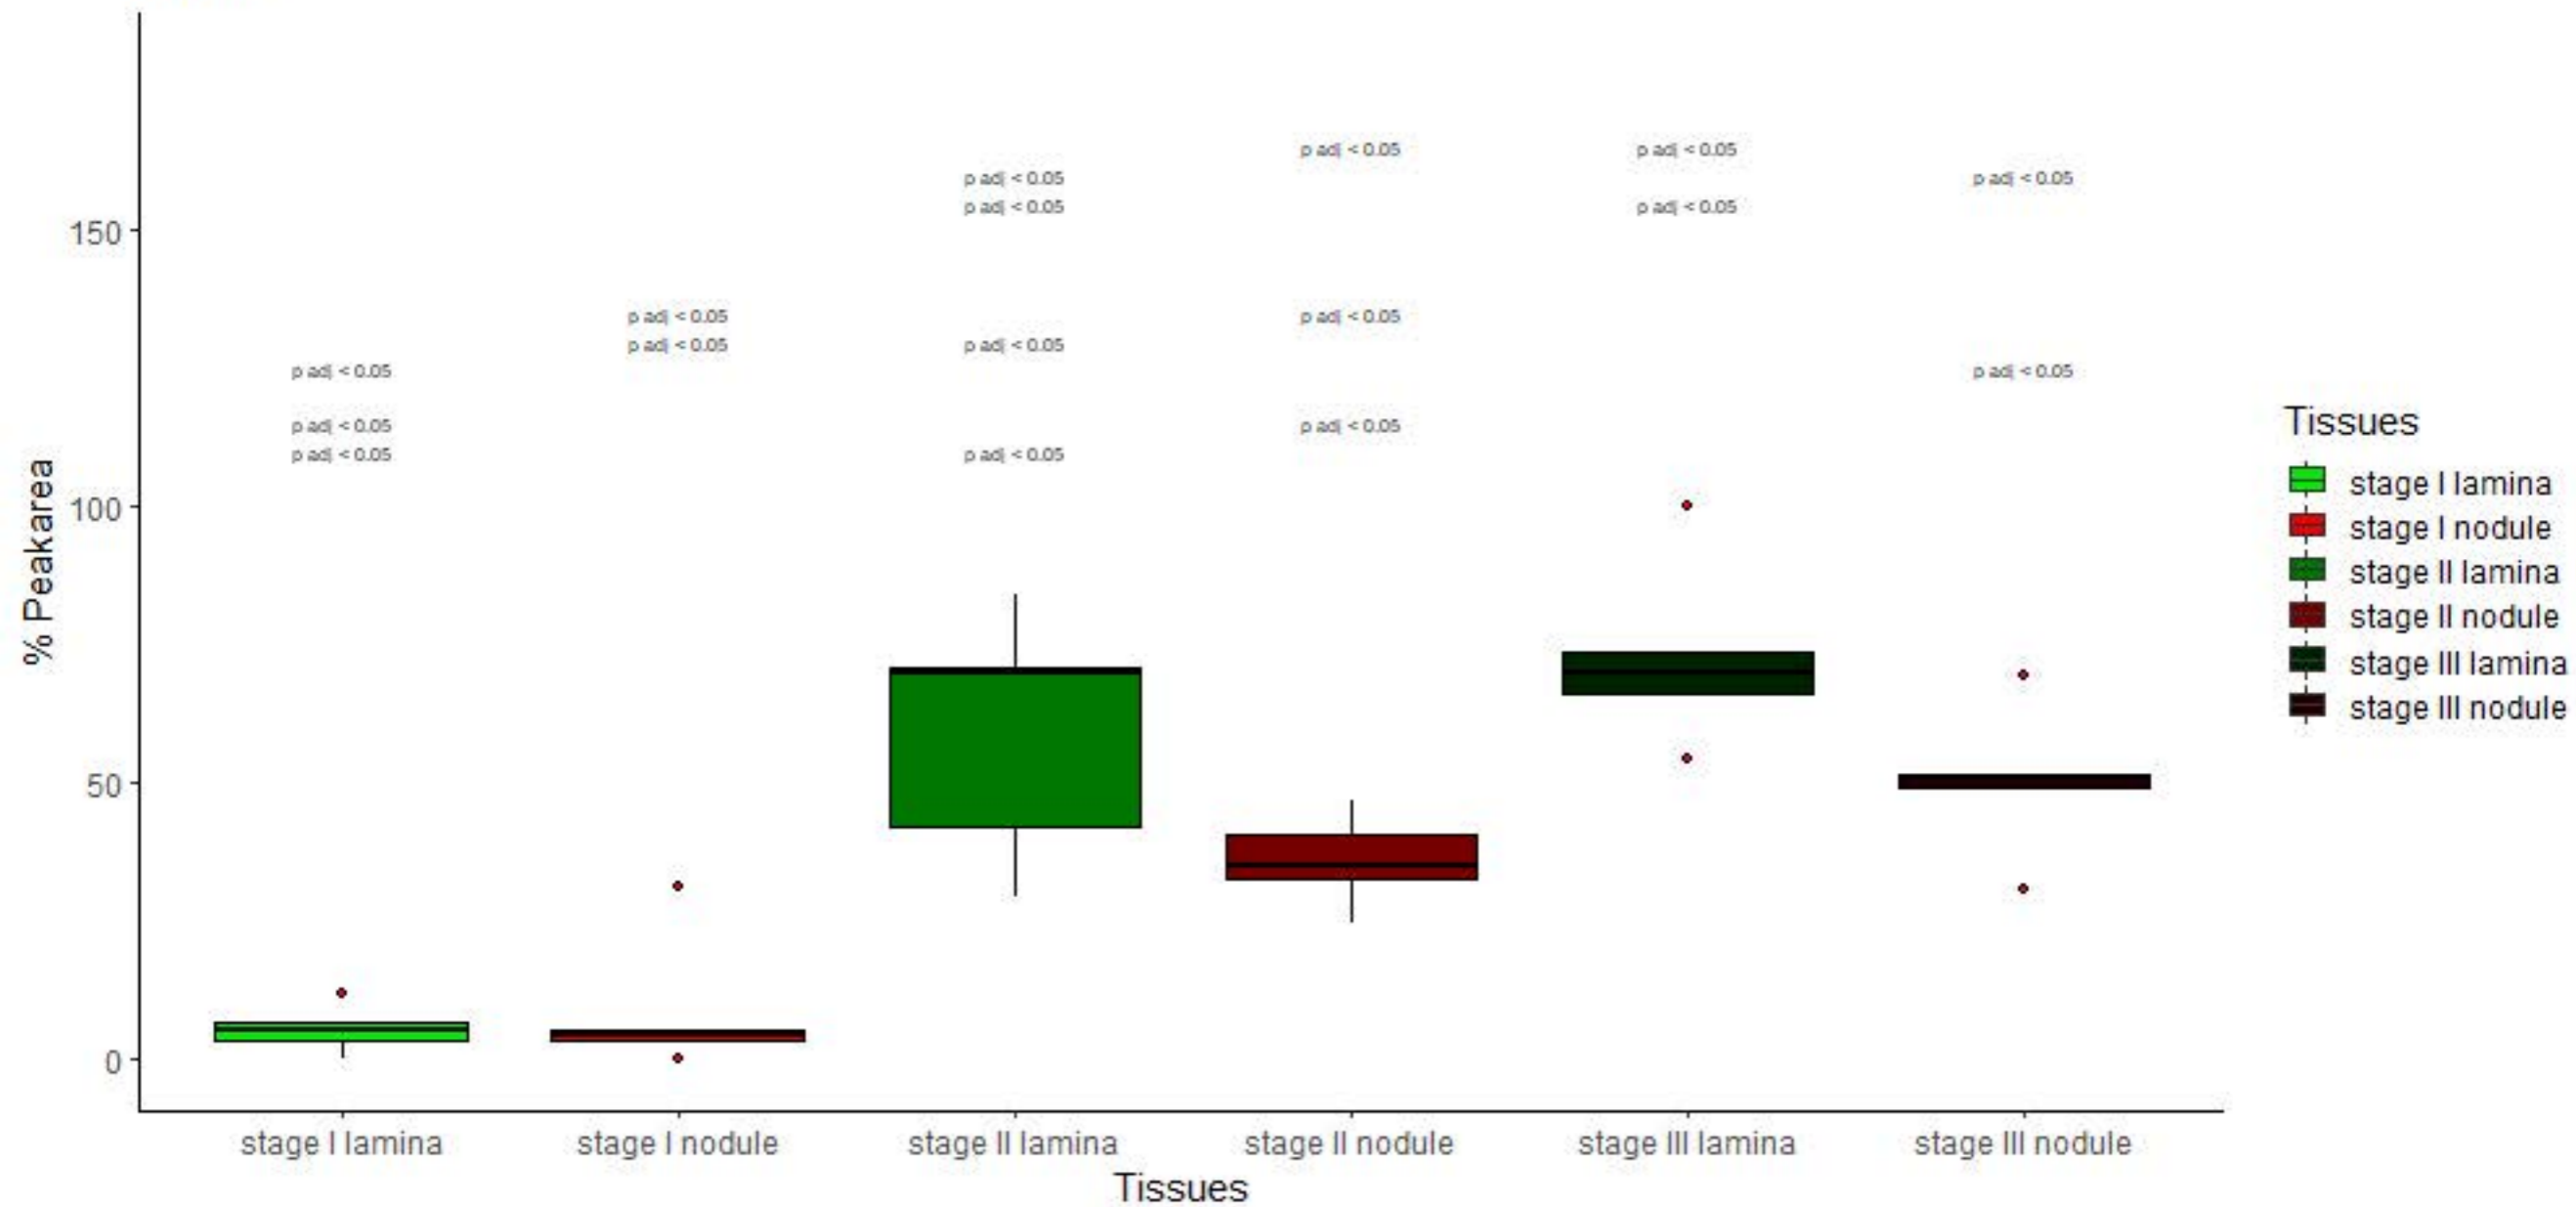

NA 93

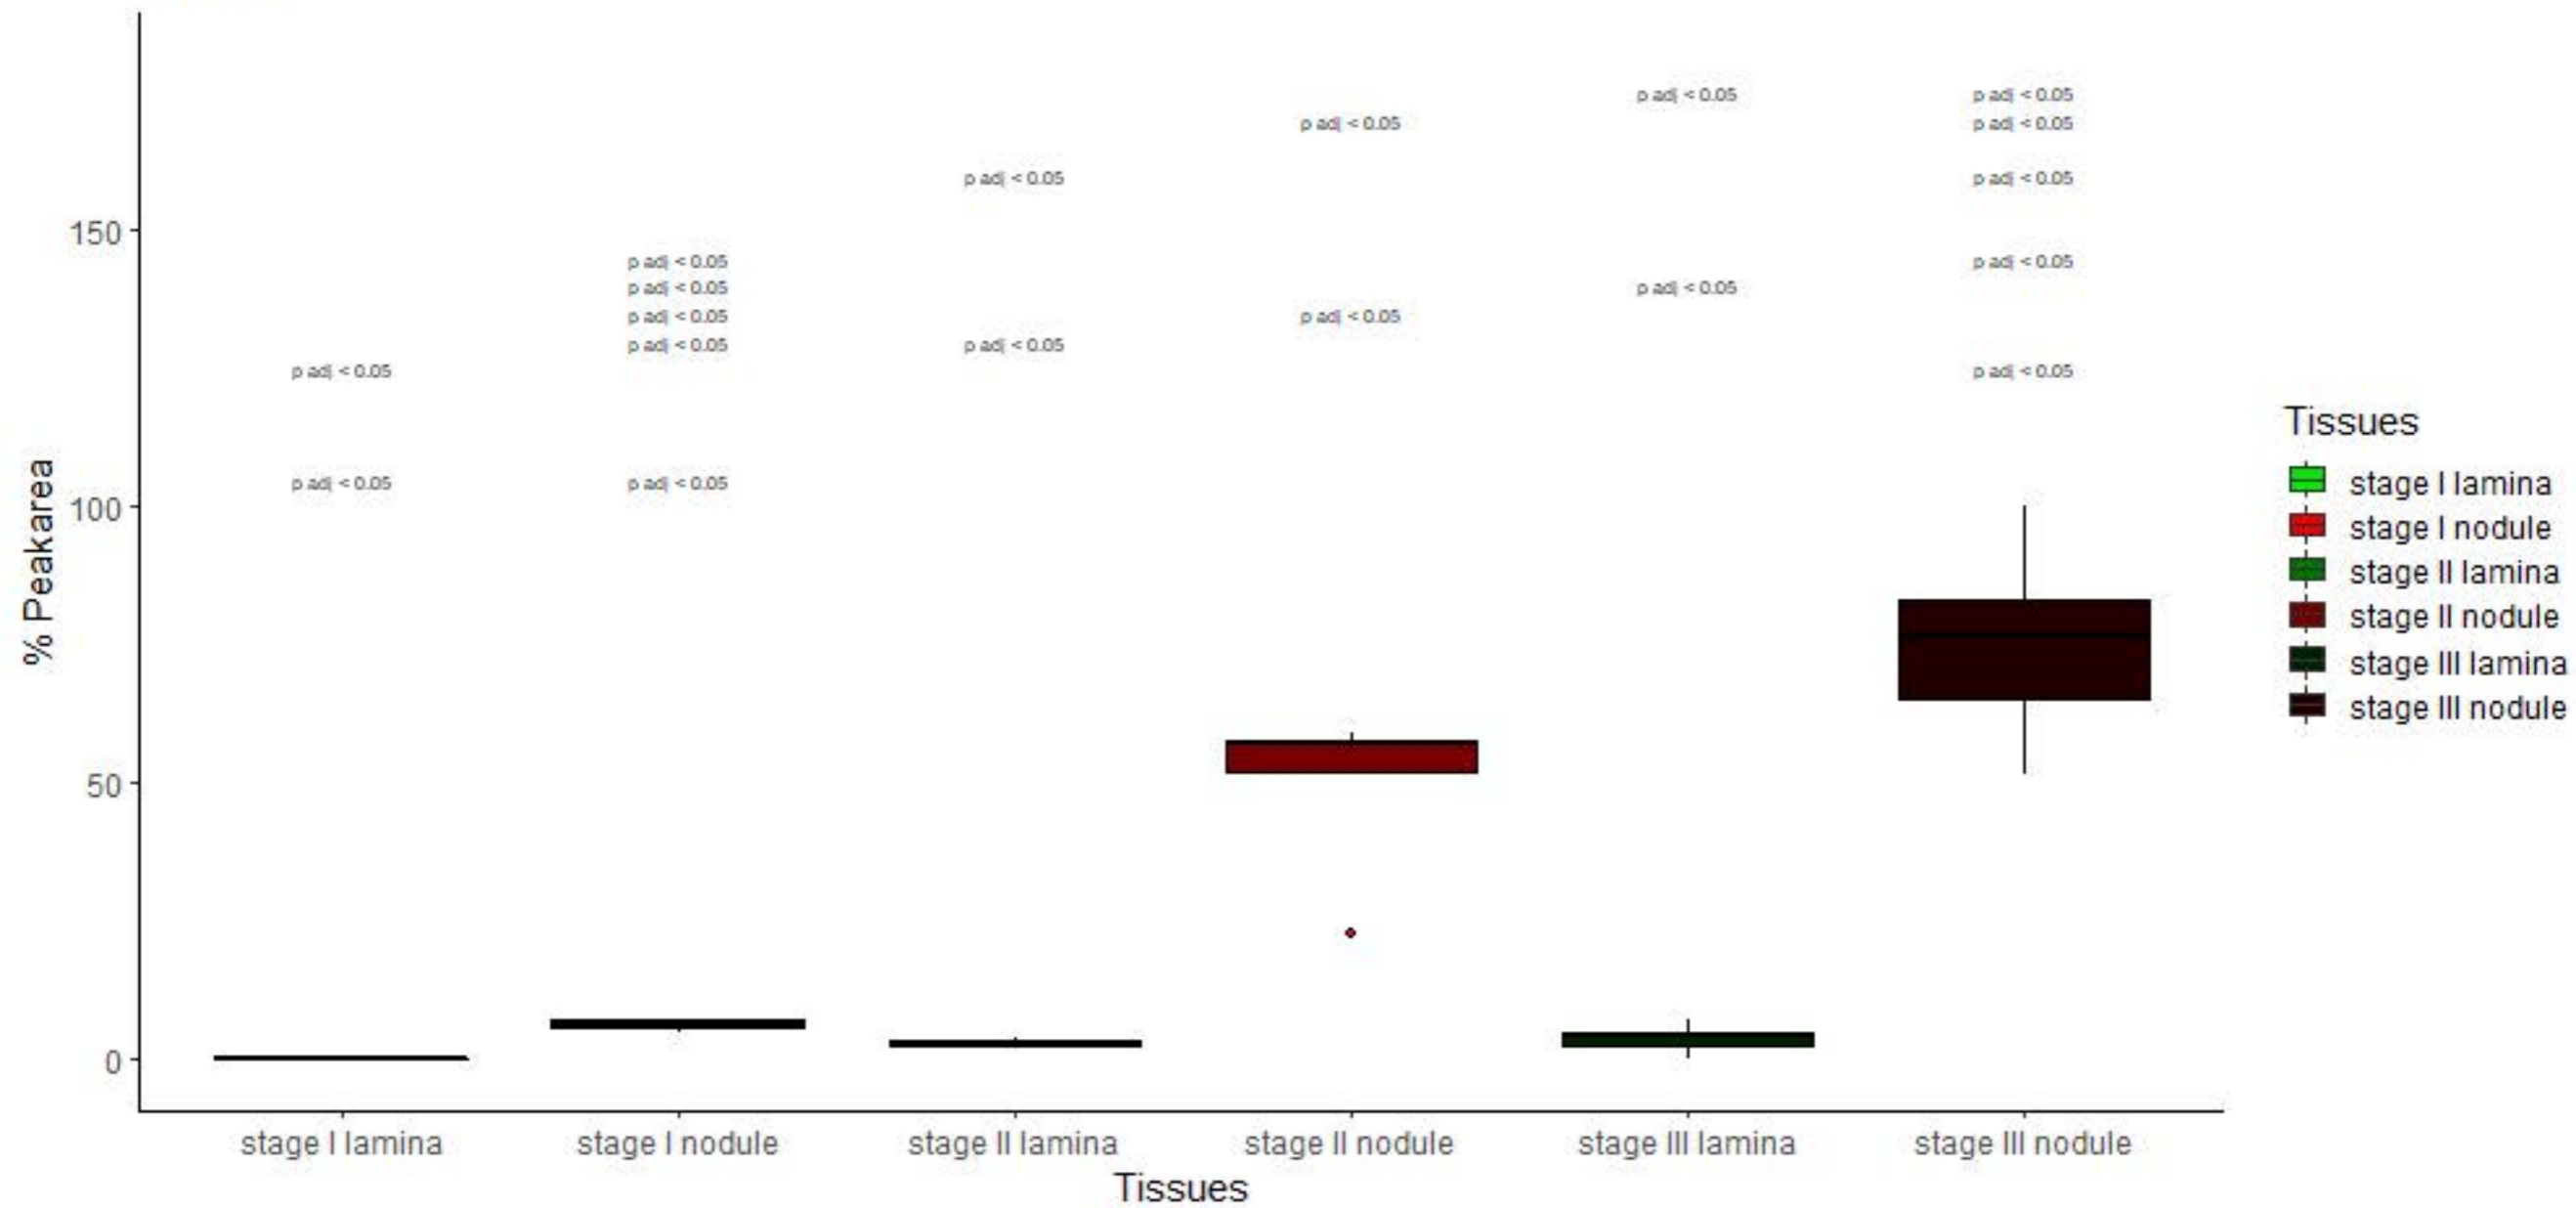

NA 99

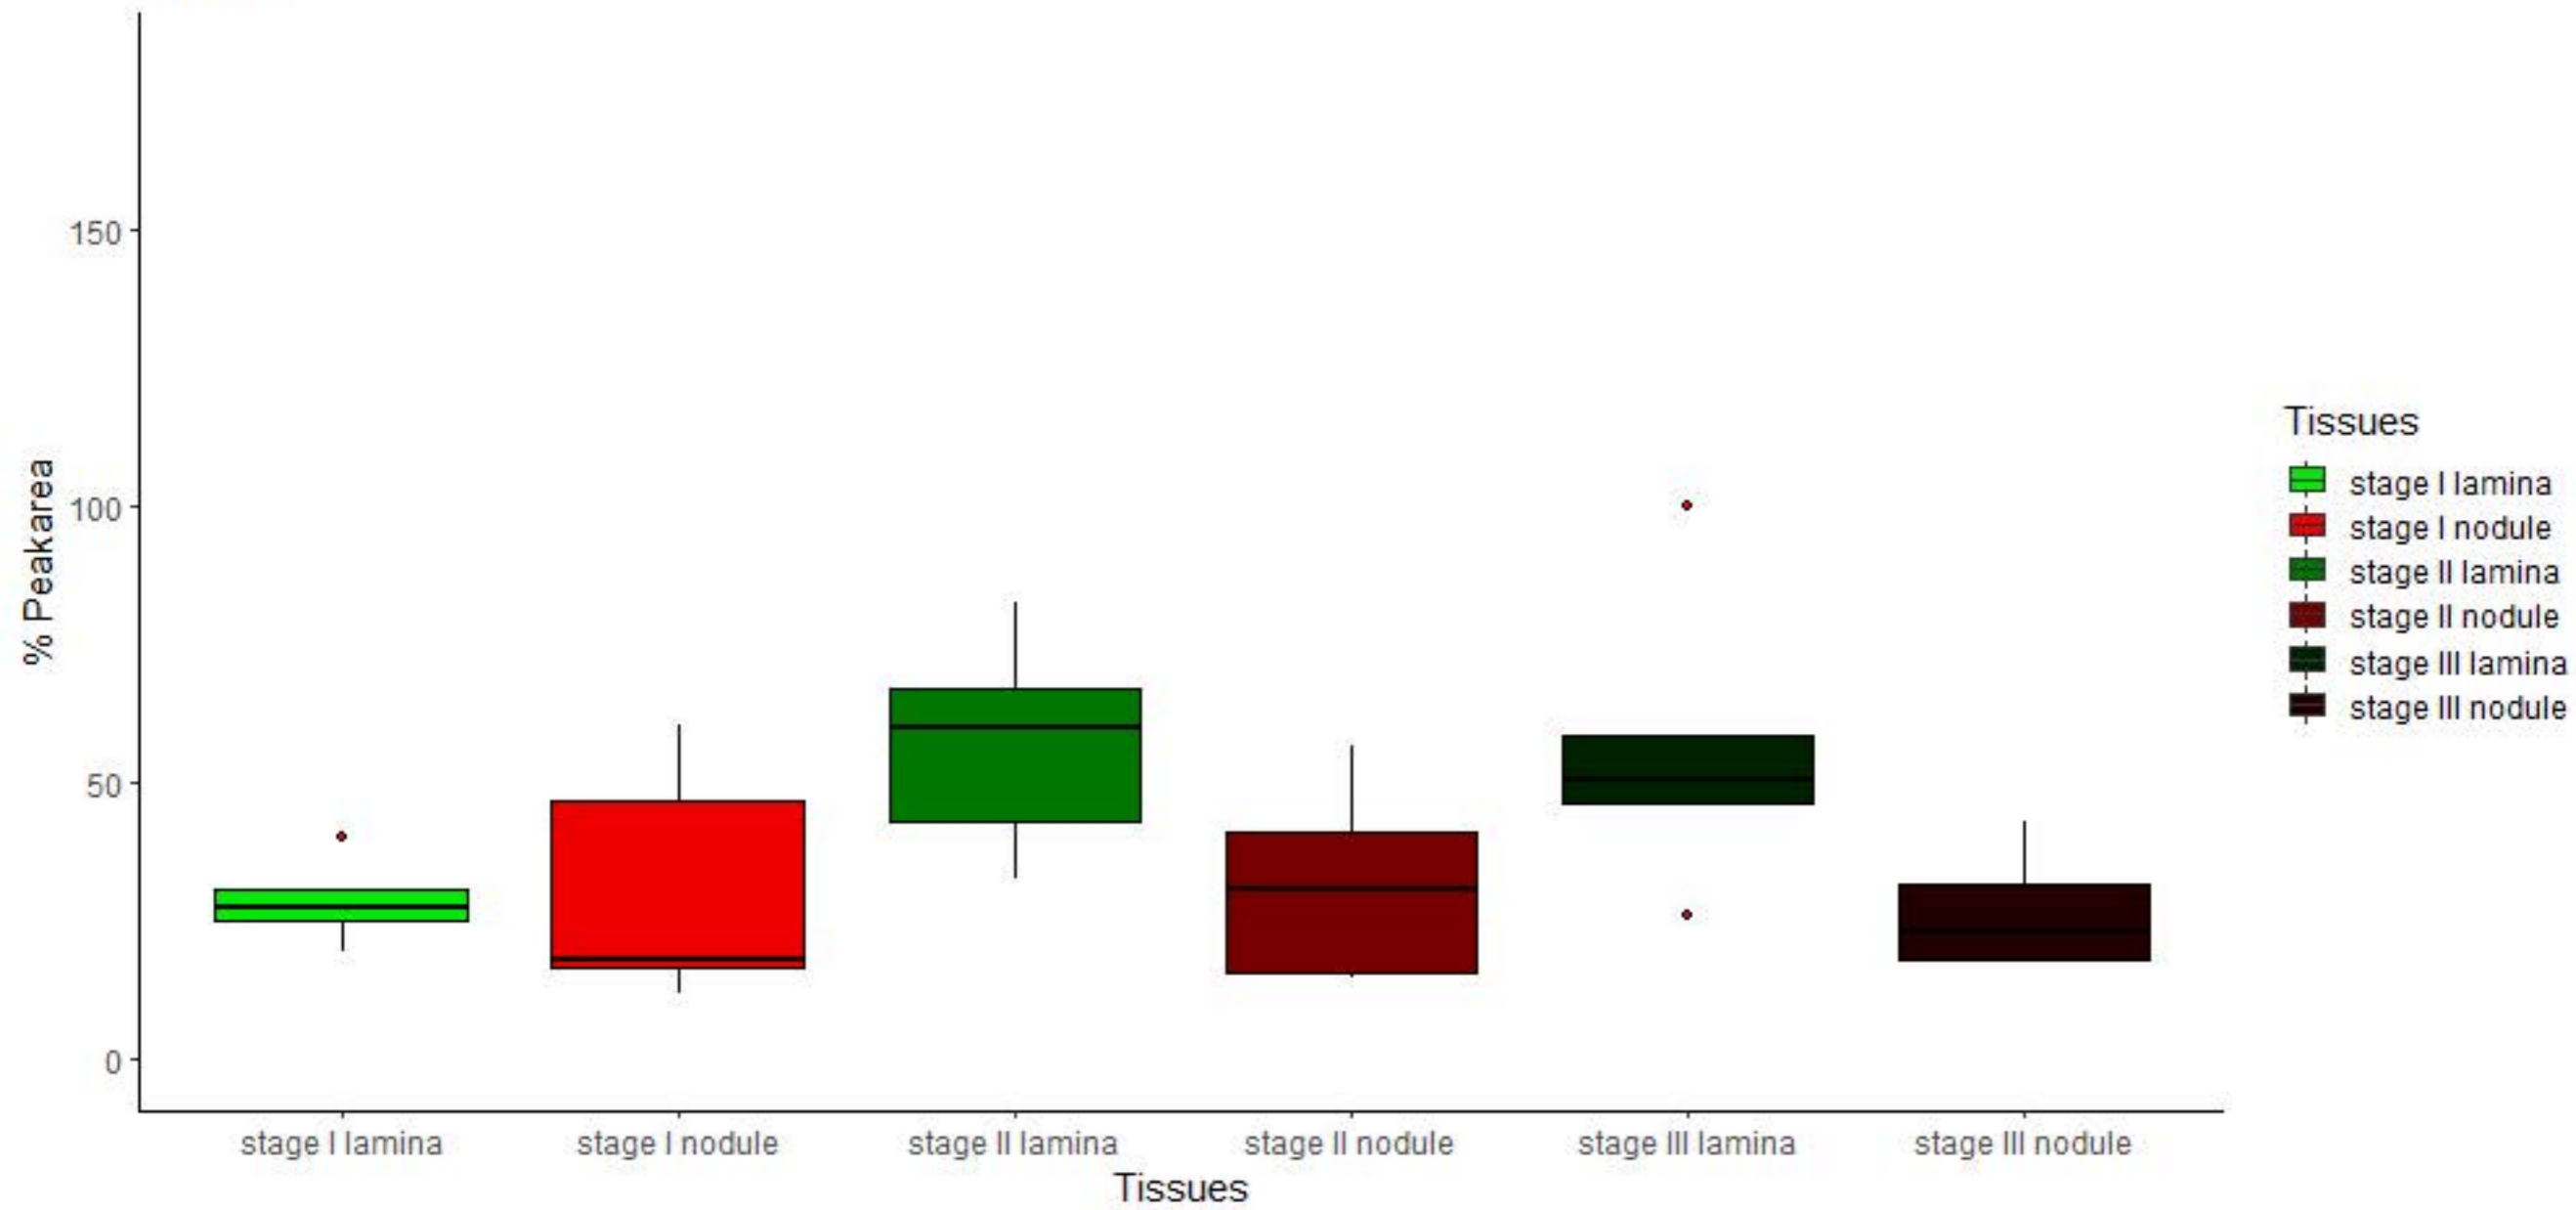

NA 108

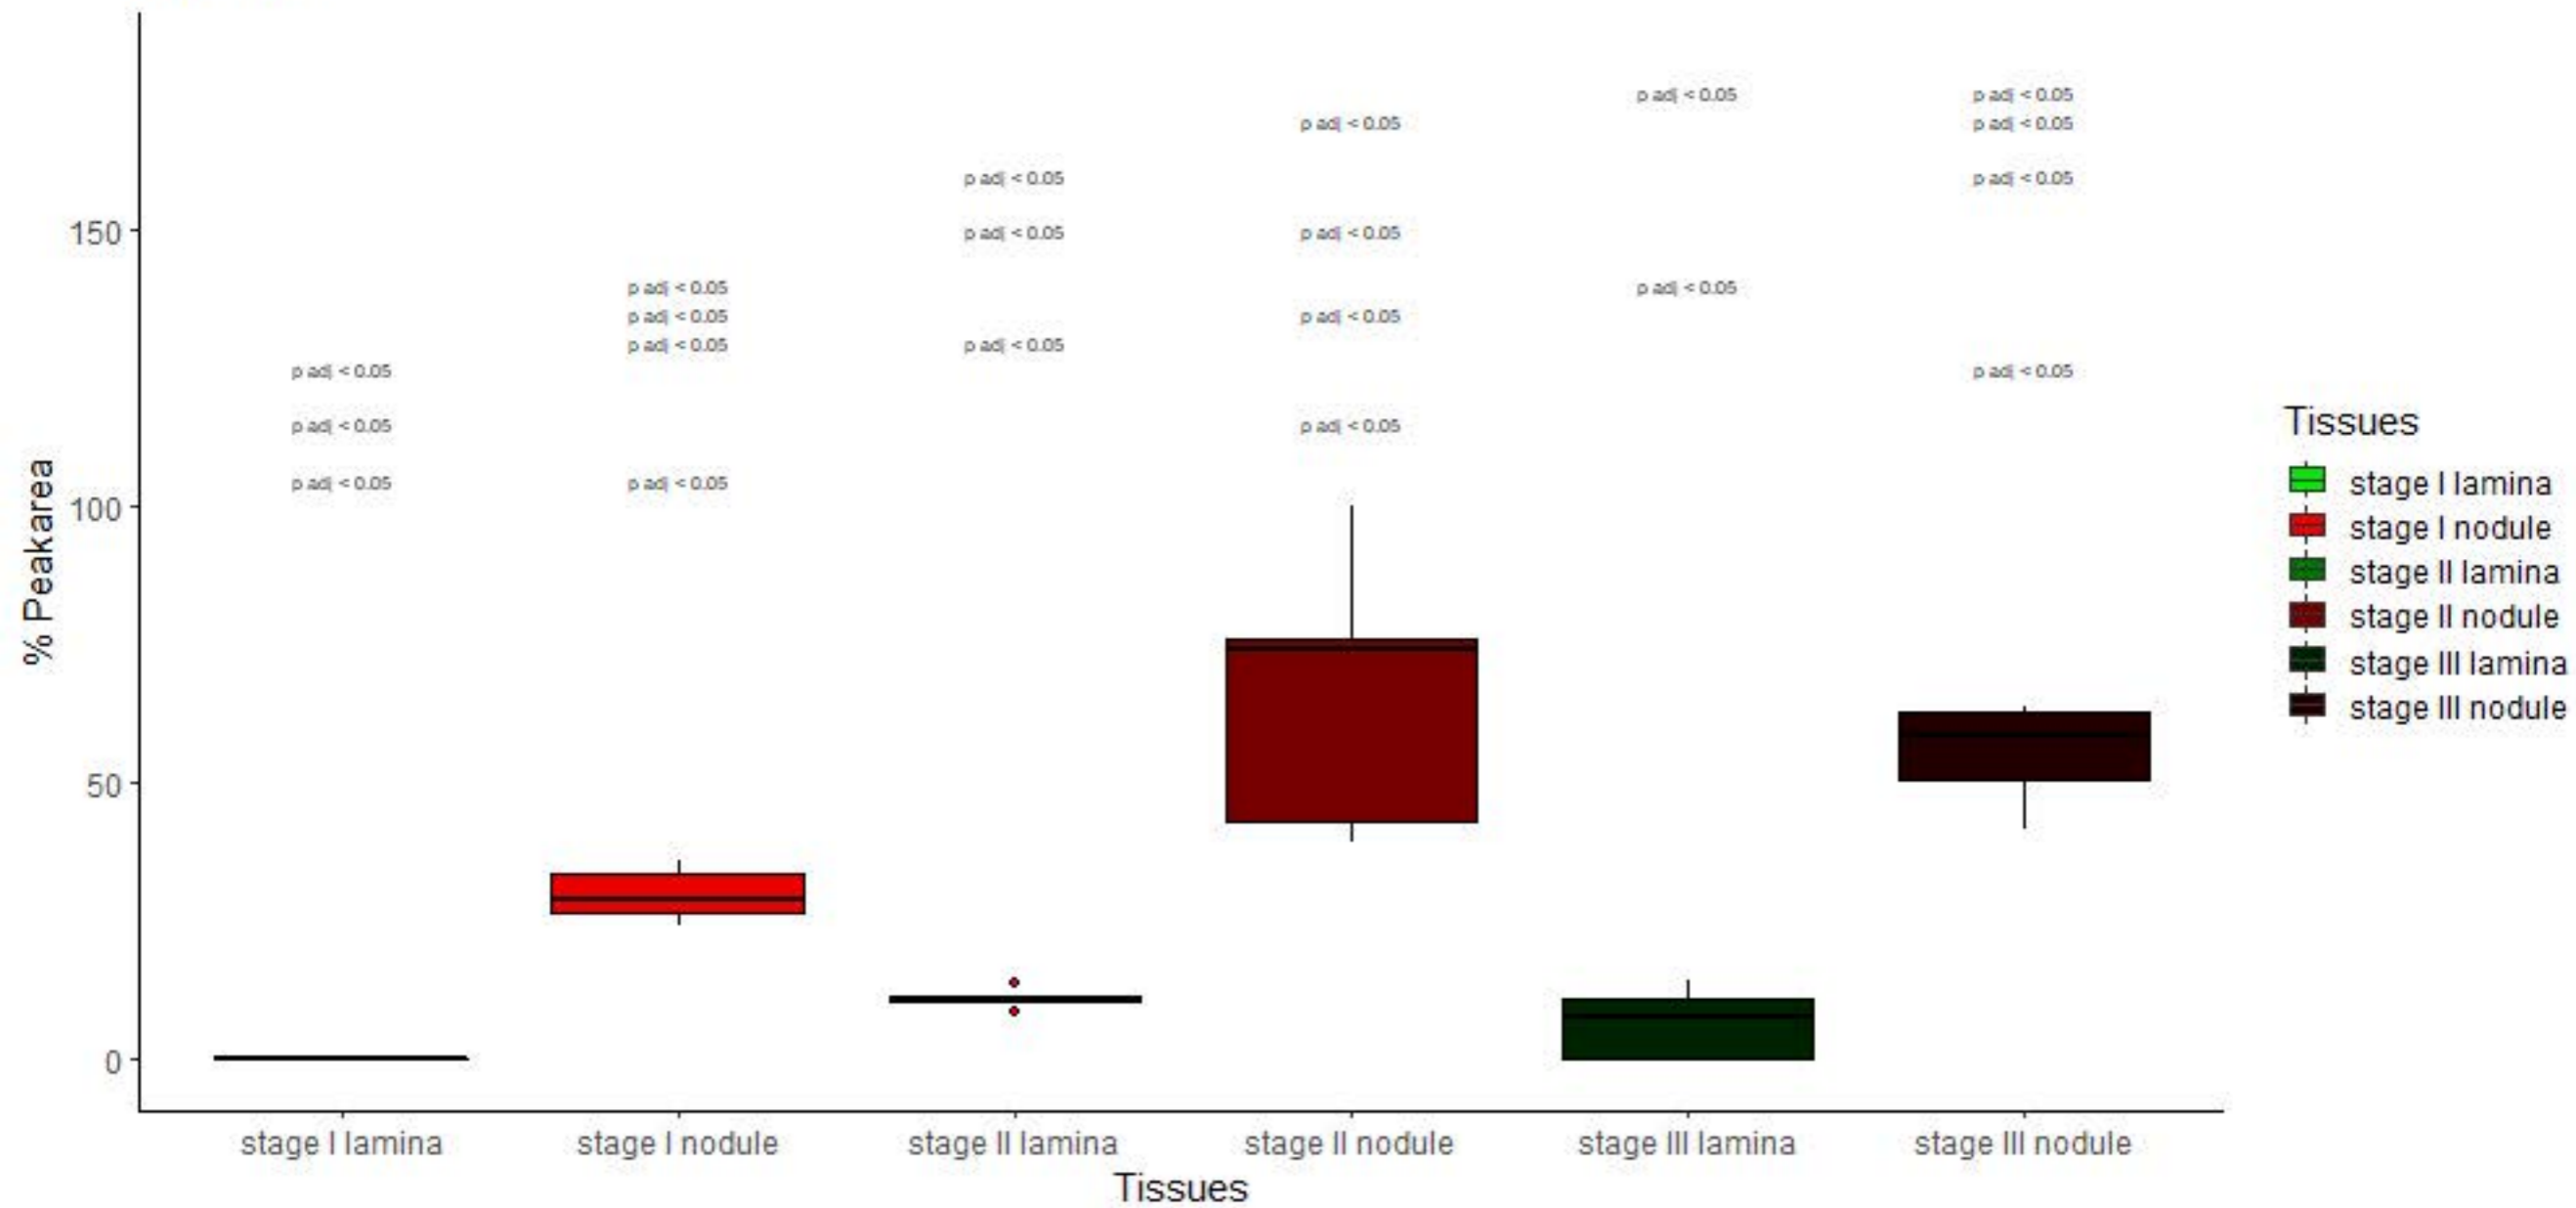

NA 151

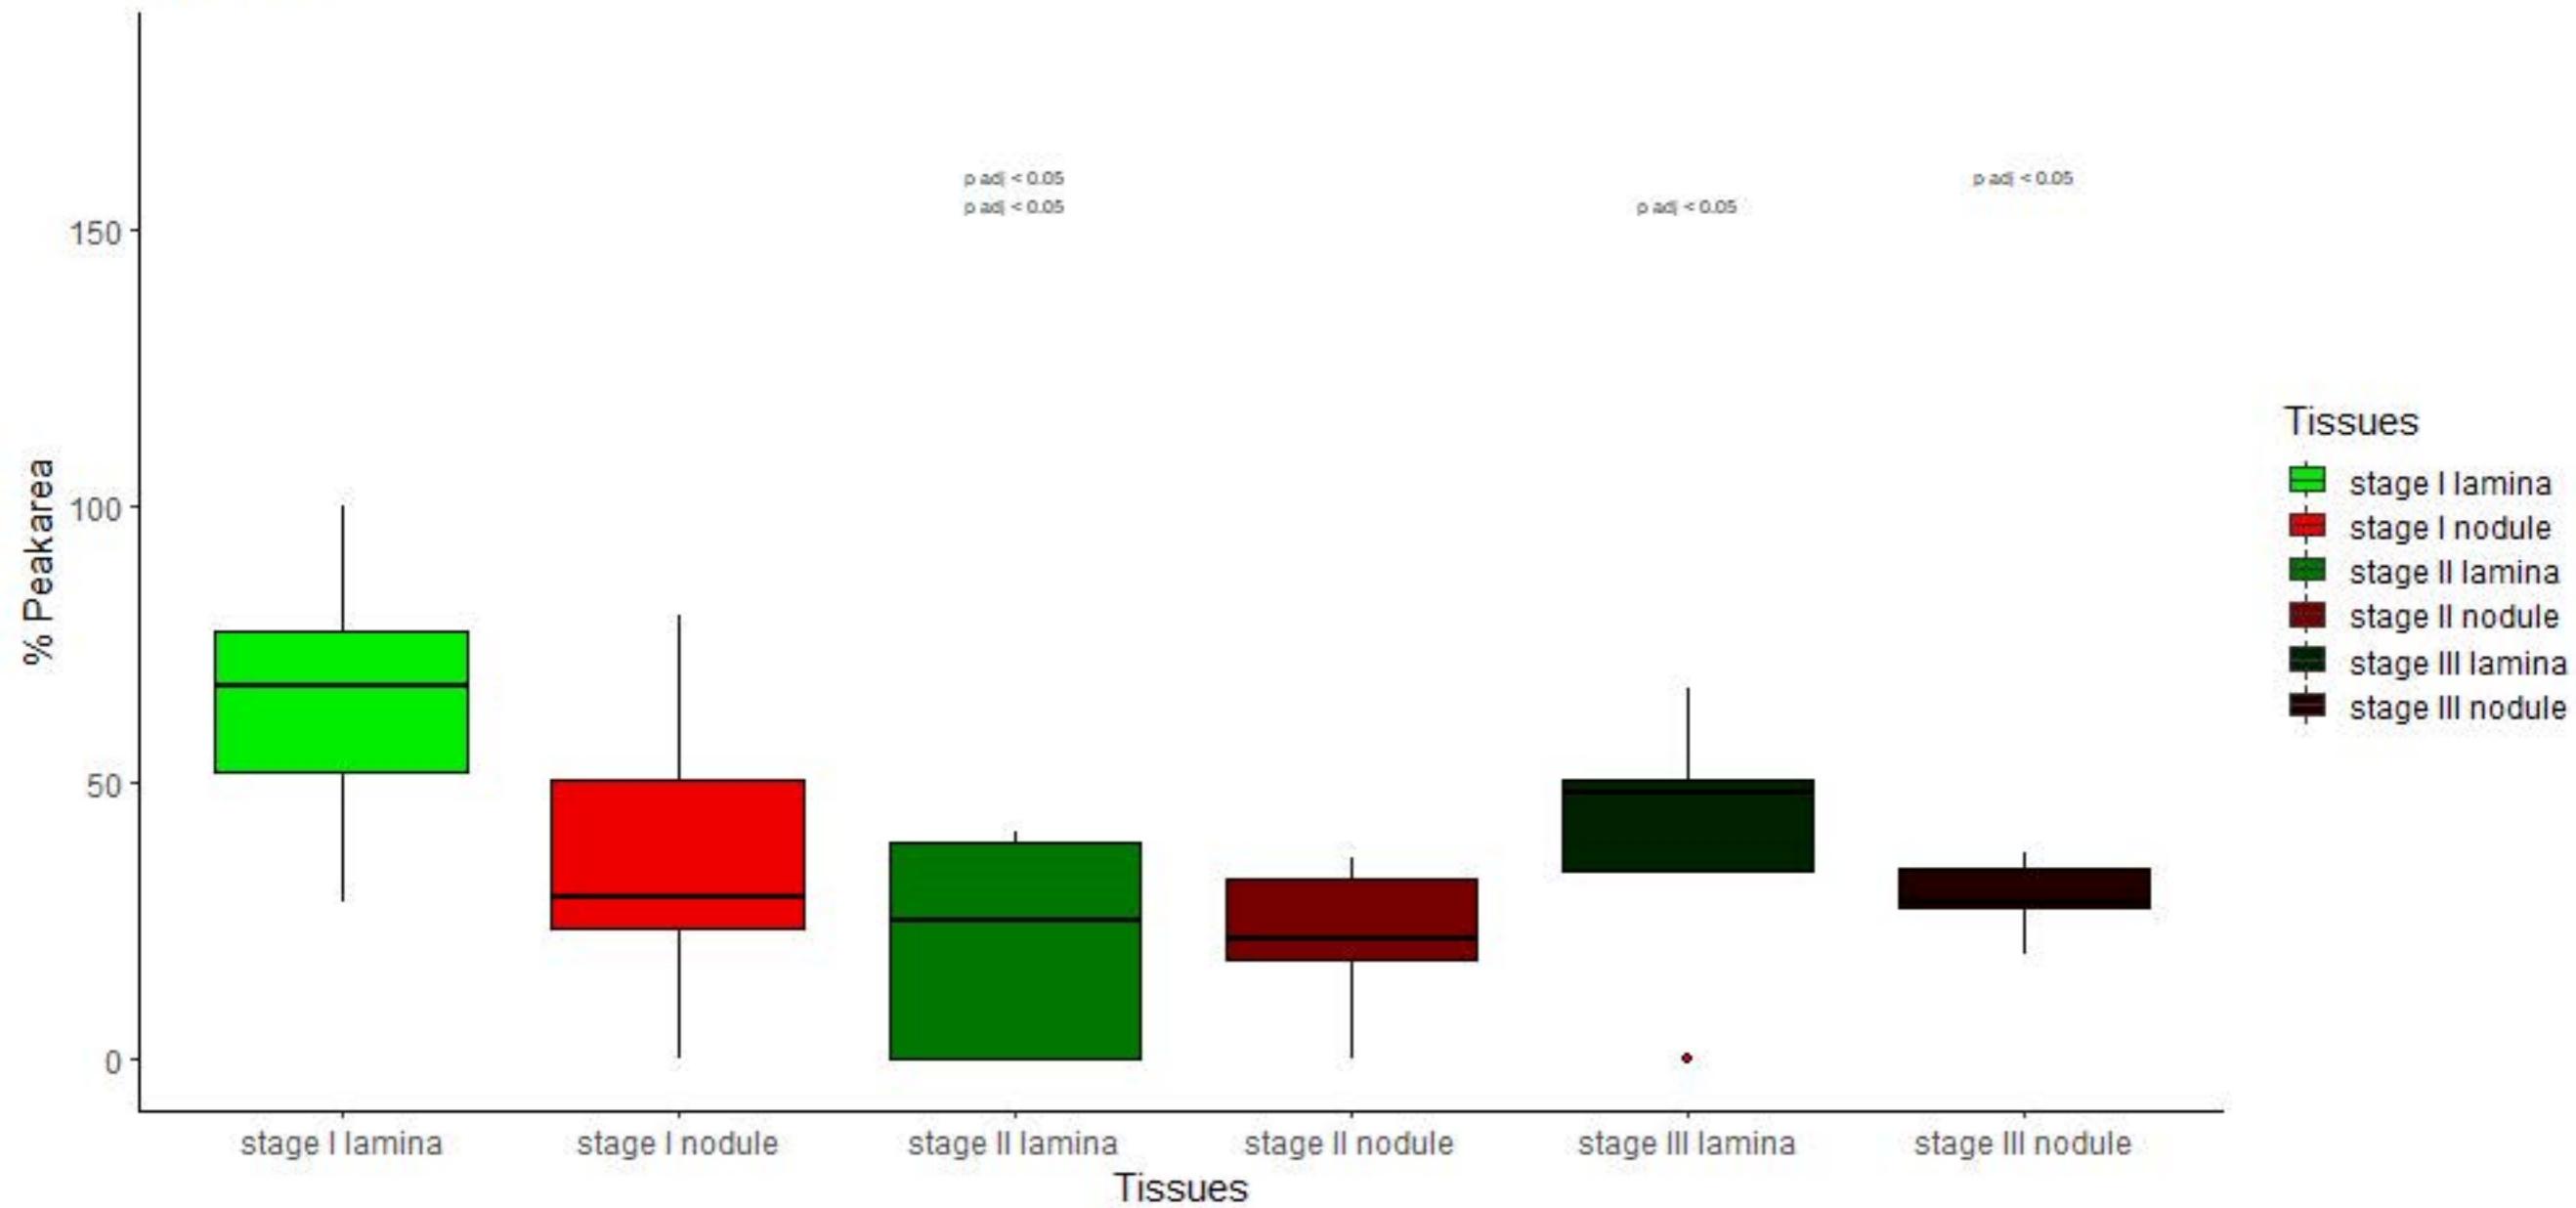

NA 170

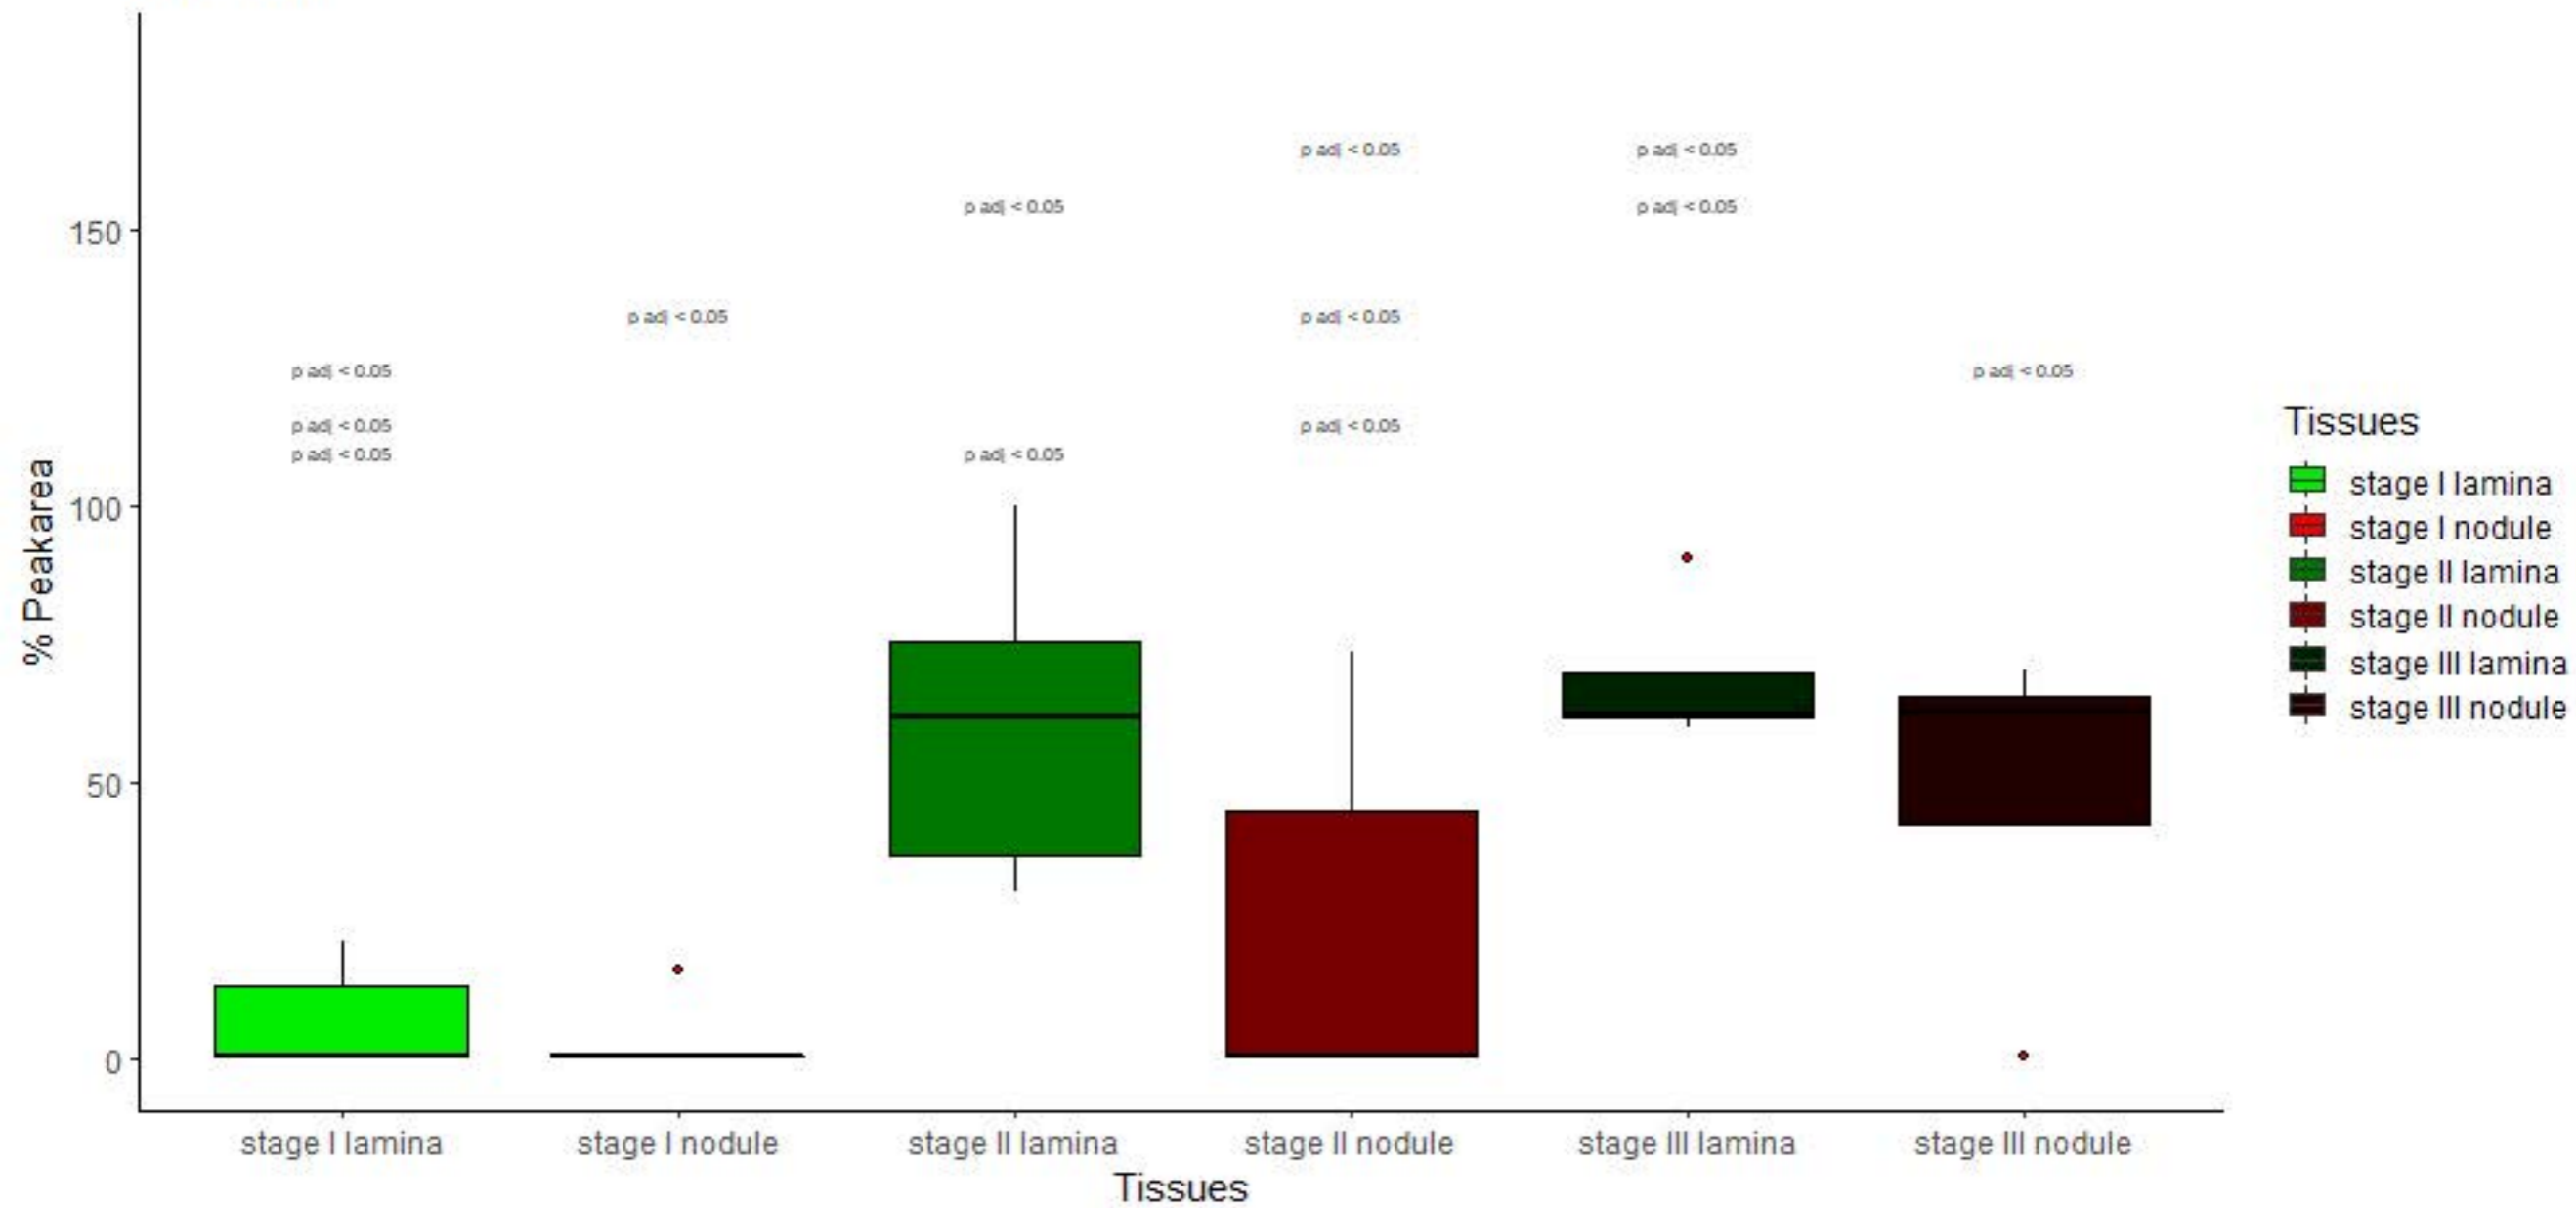

NA 23

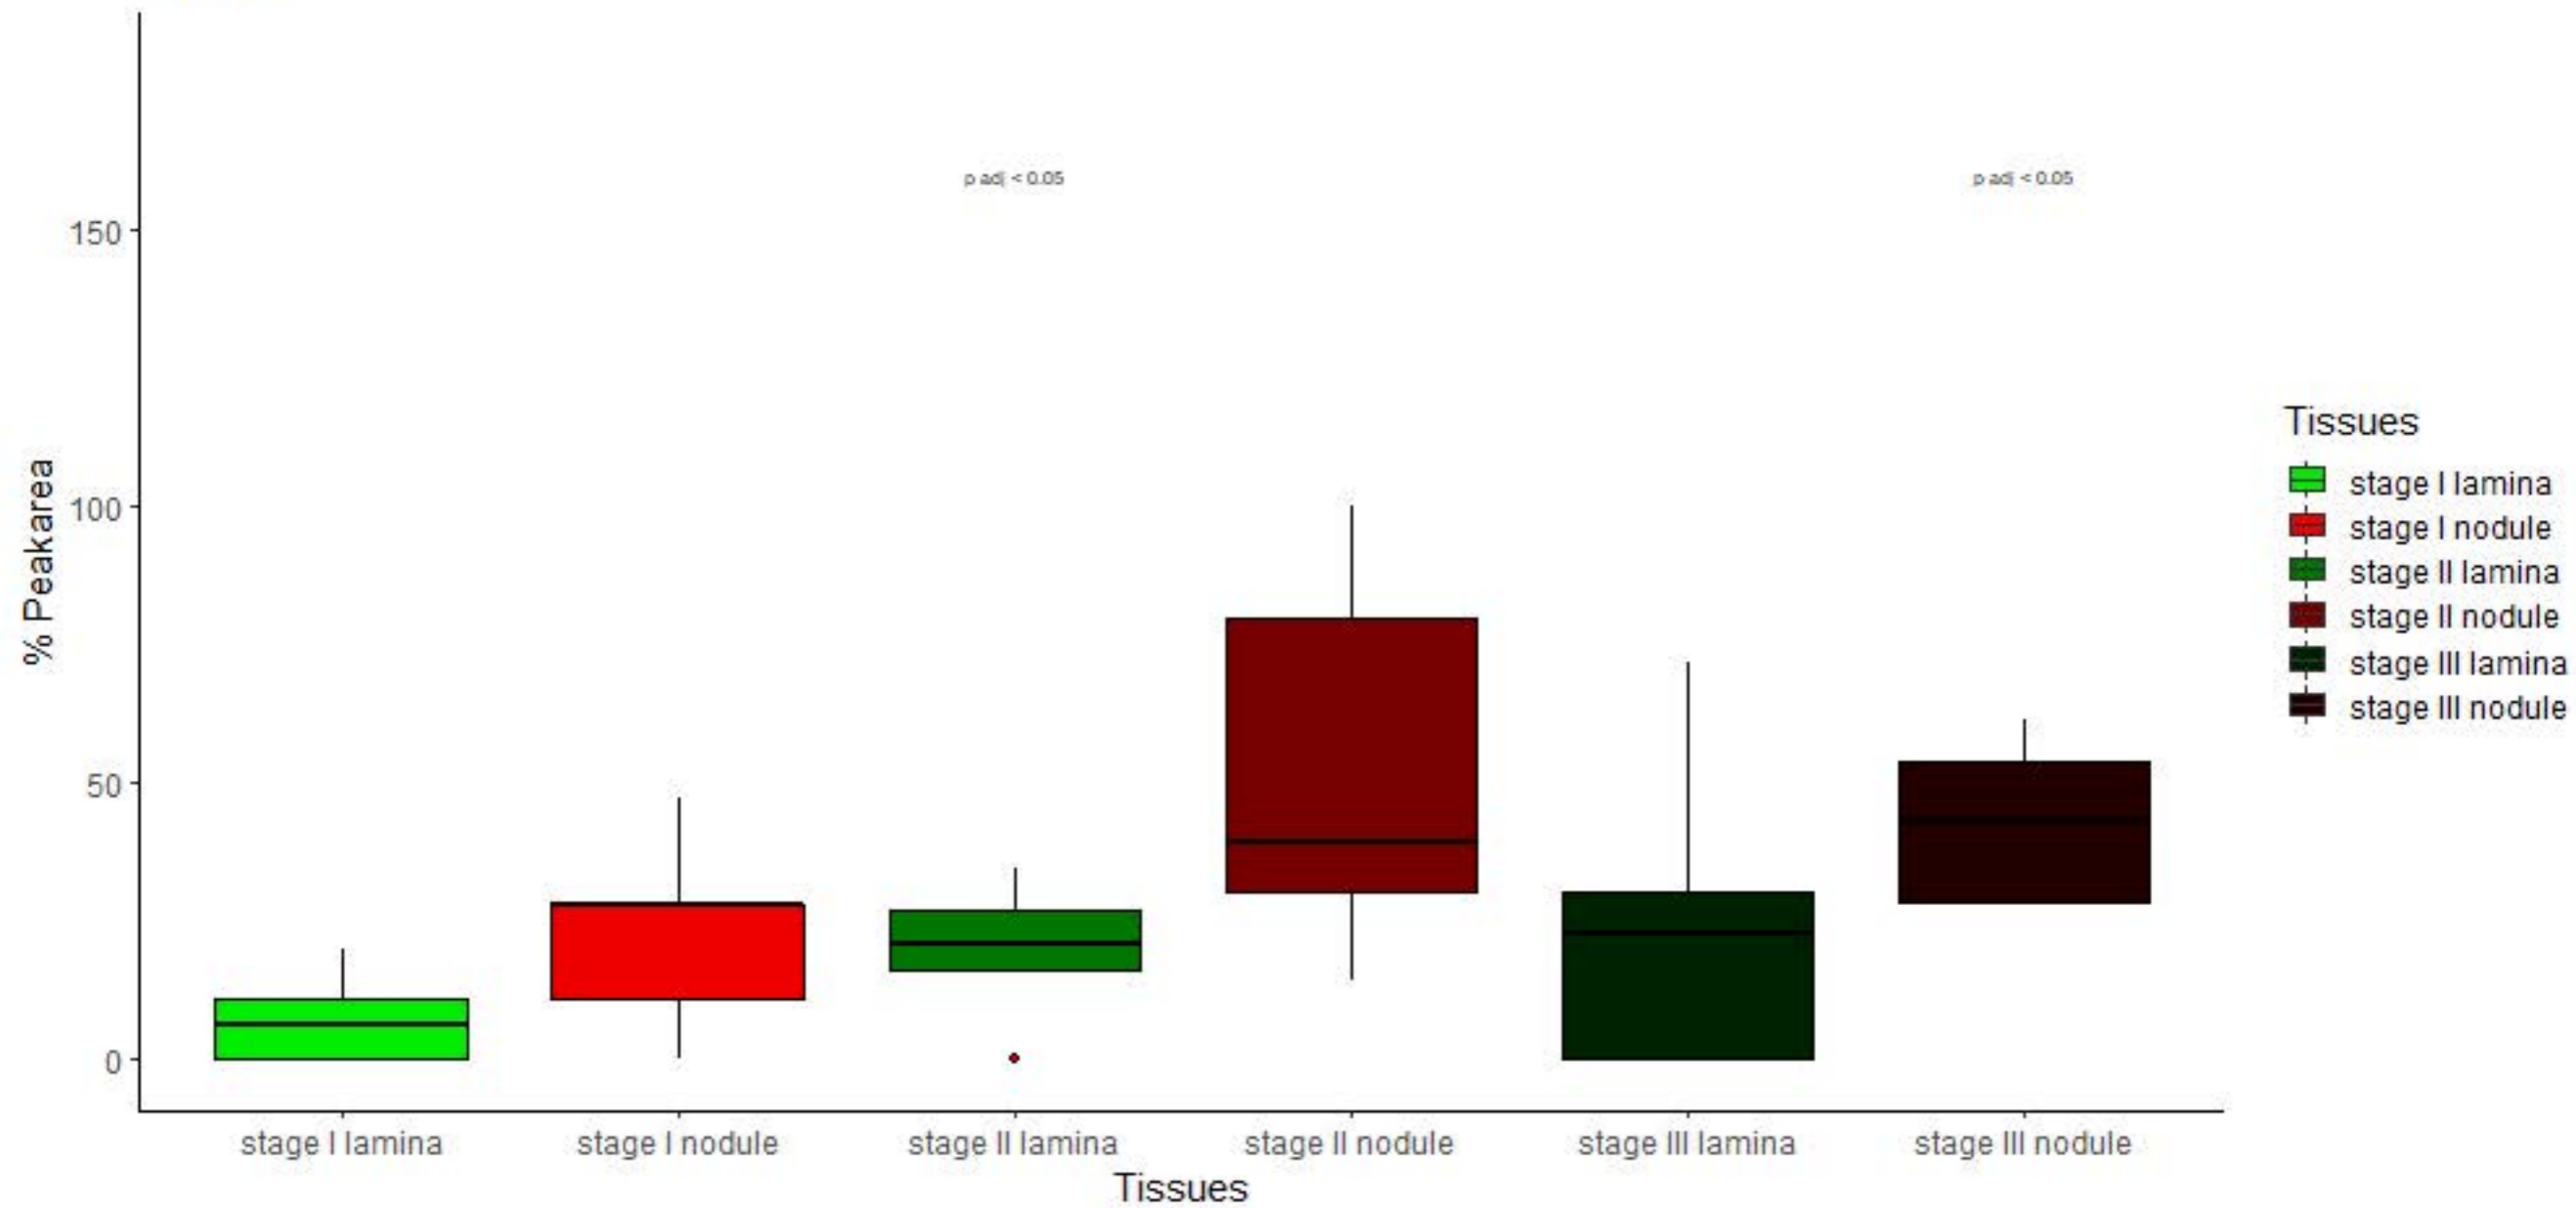



NA 38

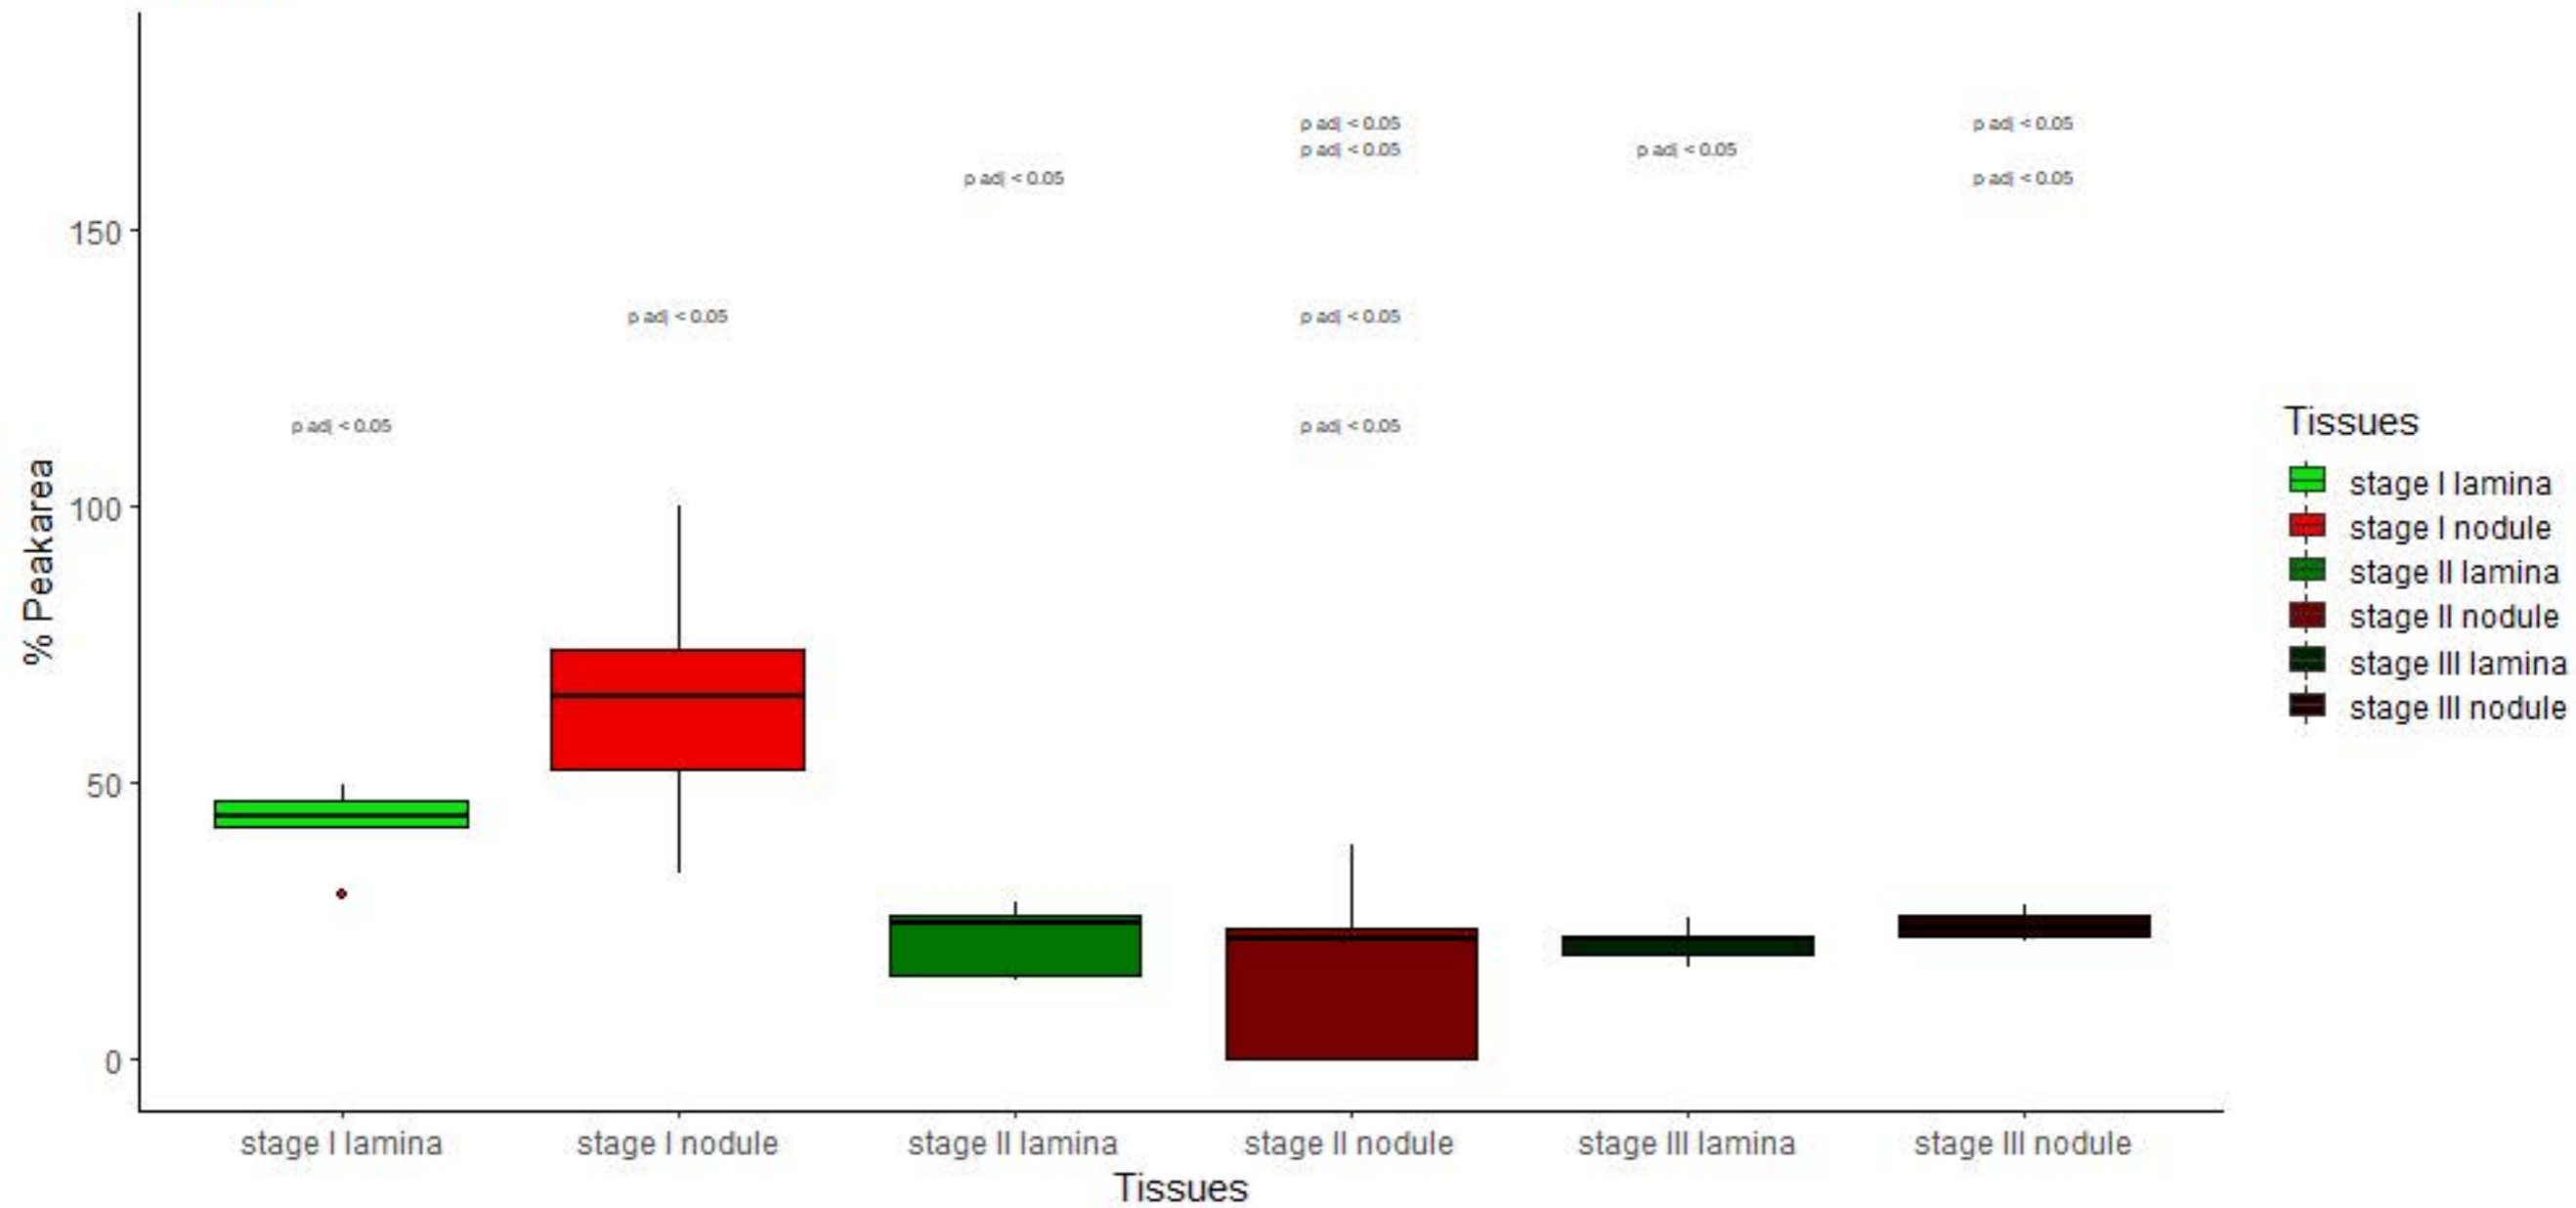

NA 44

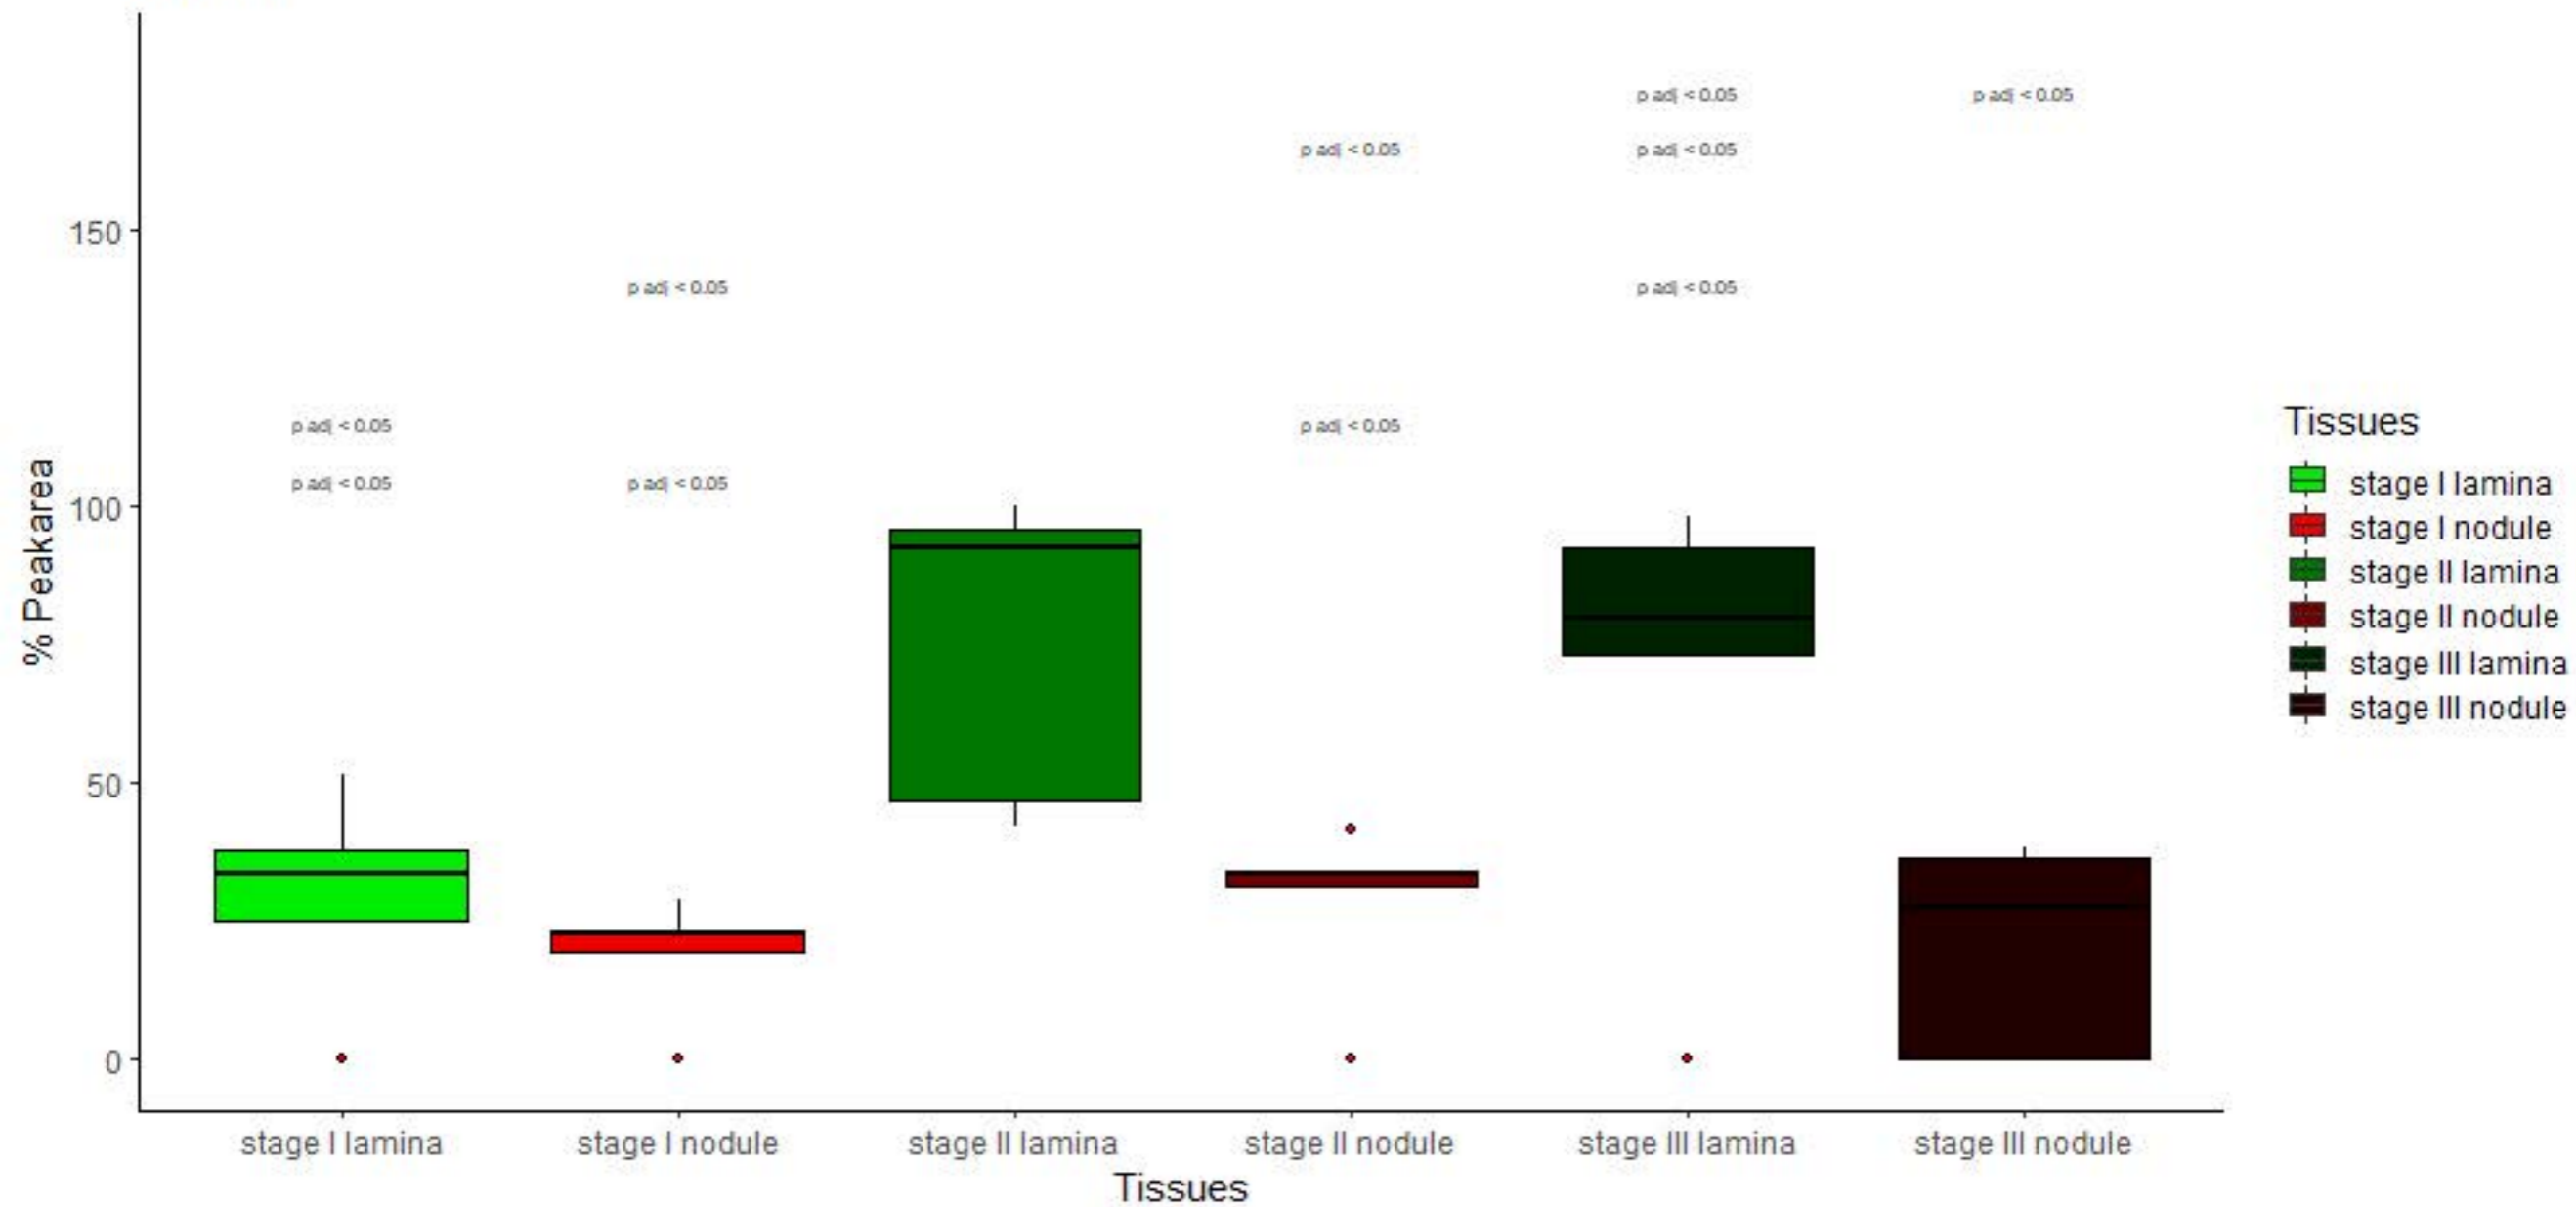

NA 72

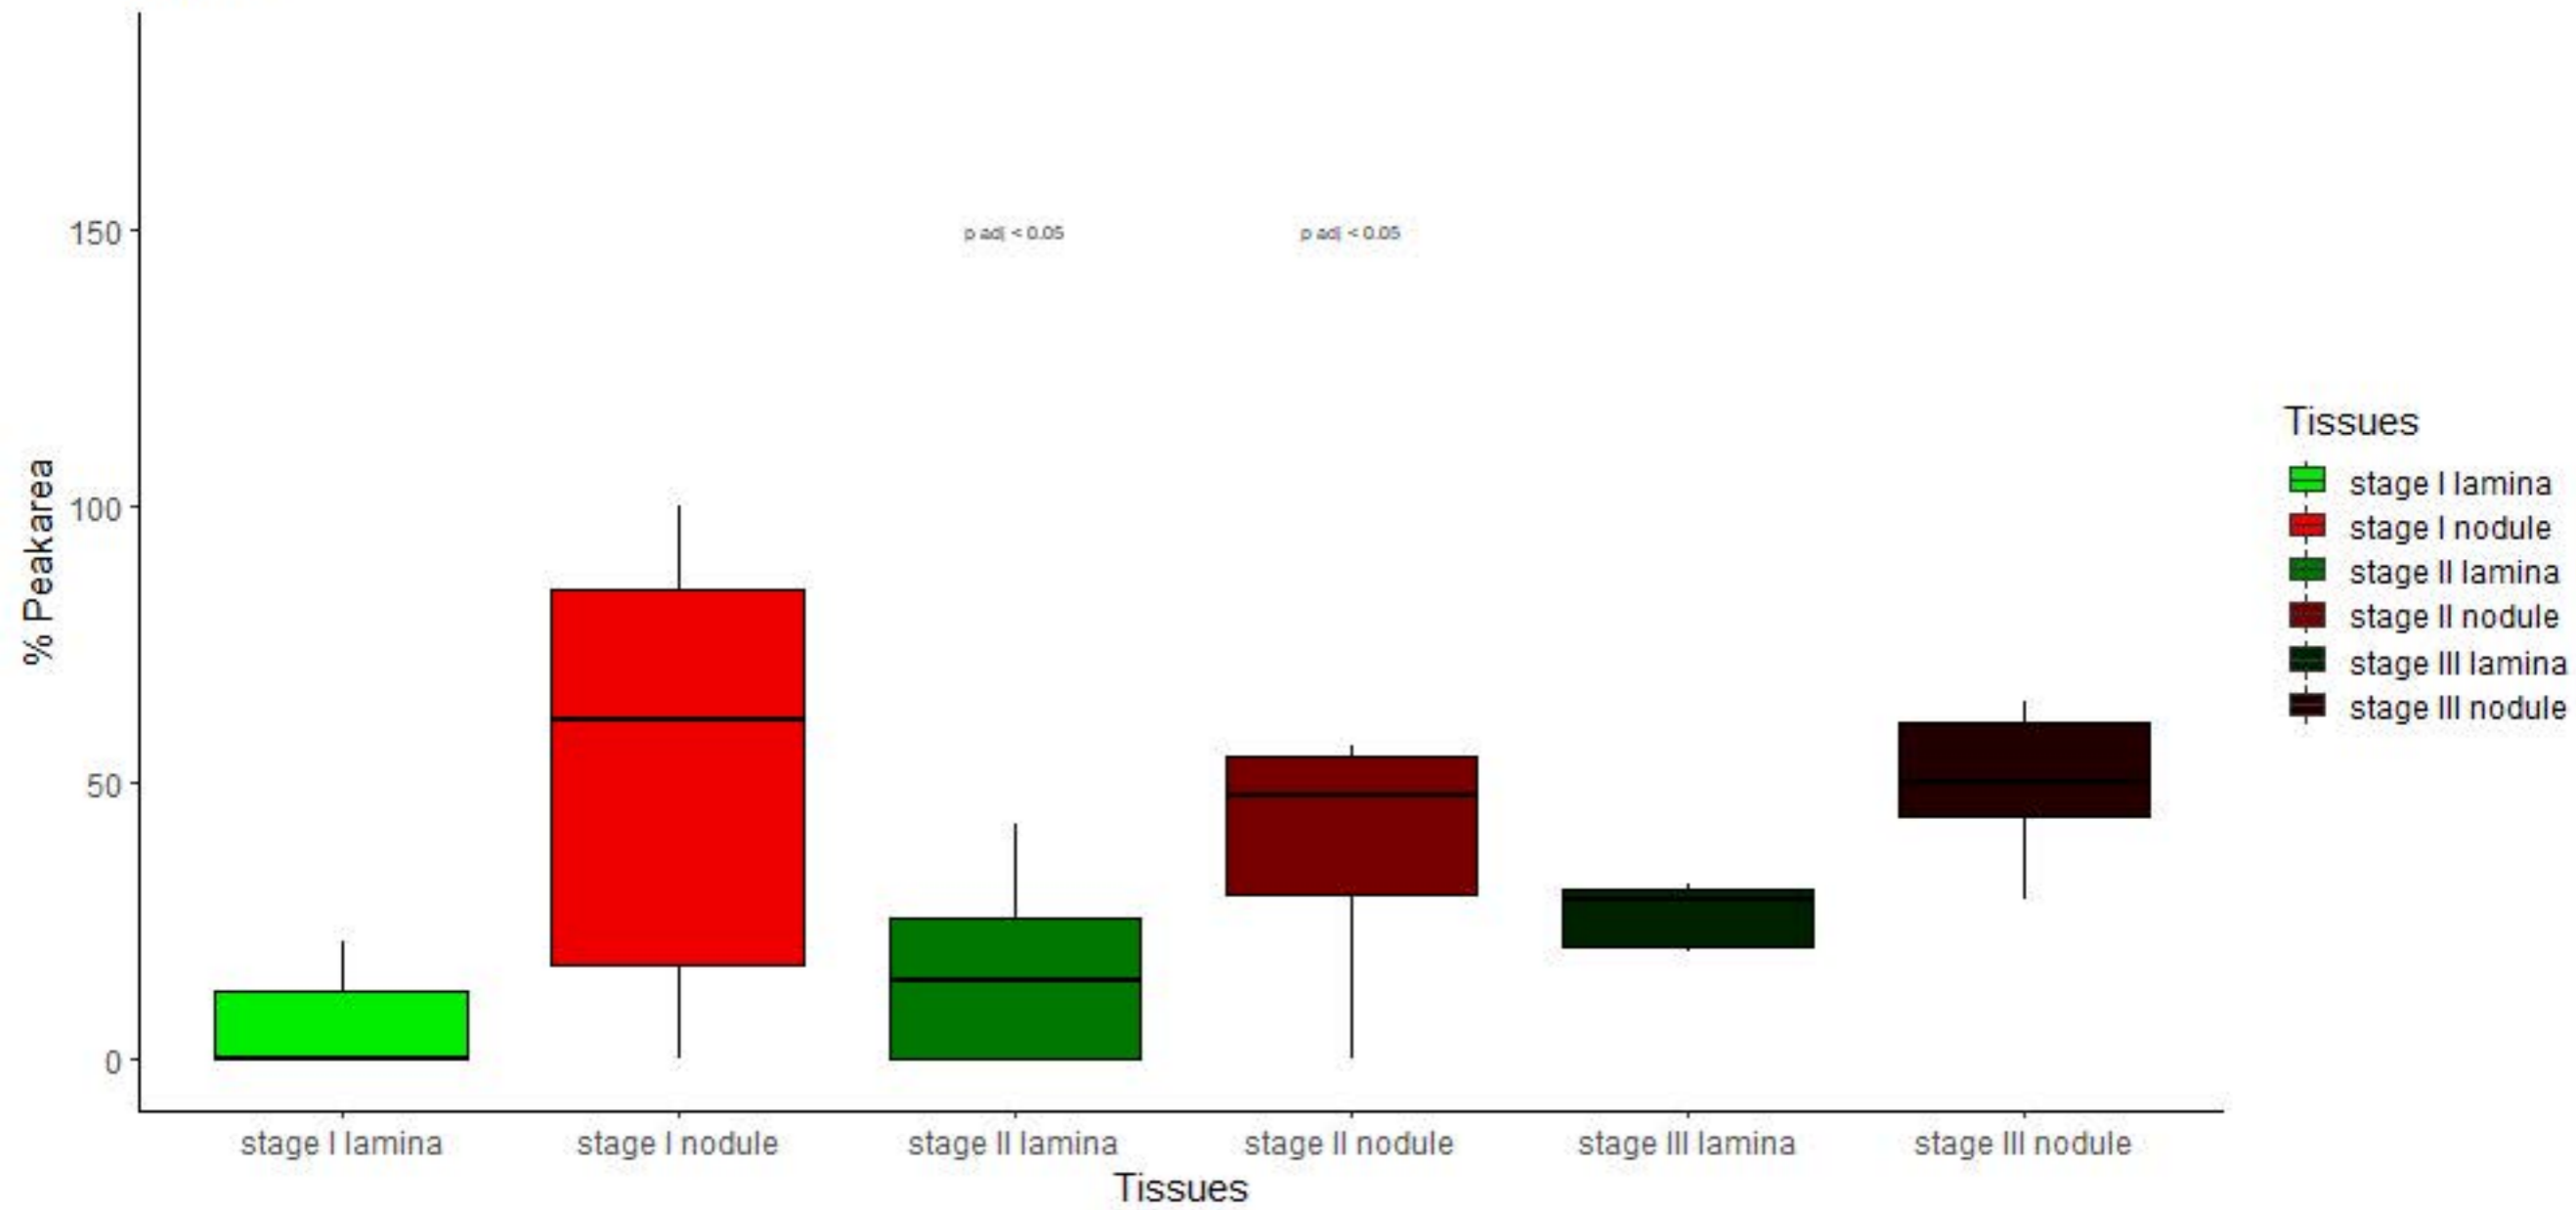

NA 77

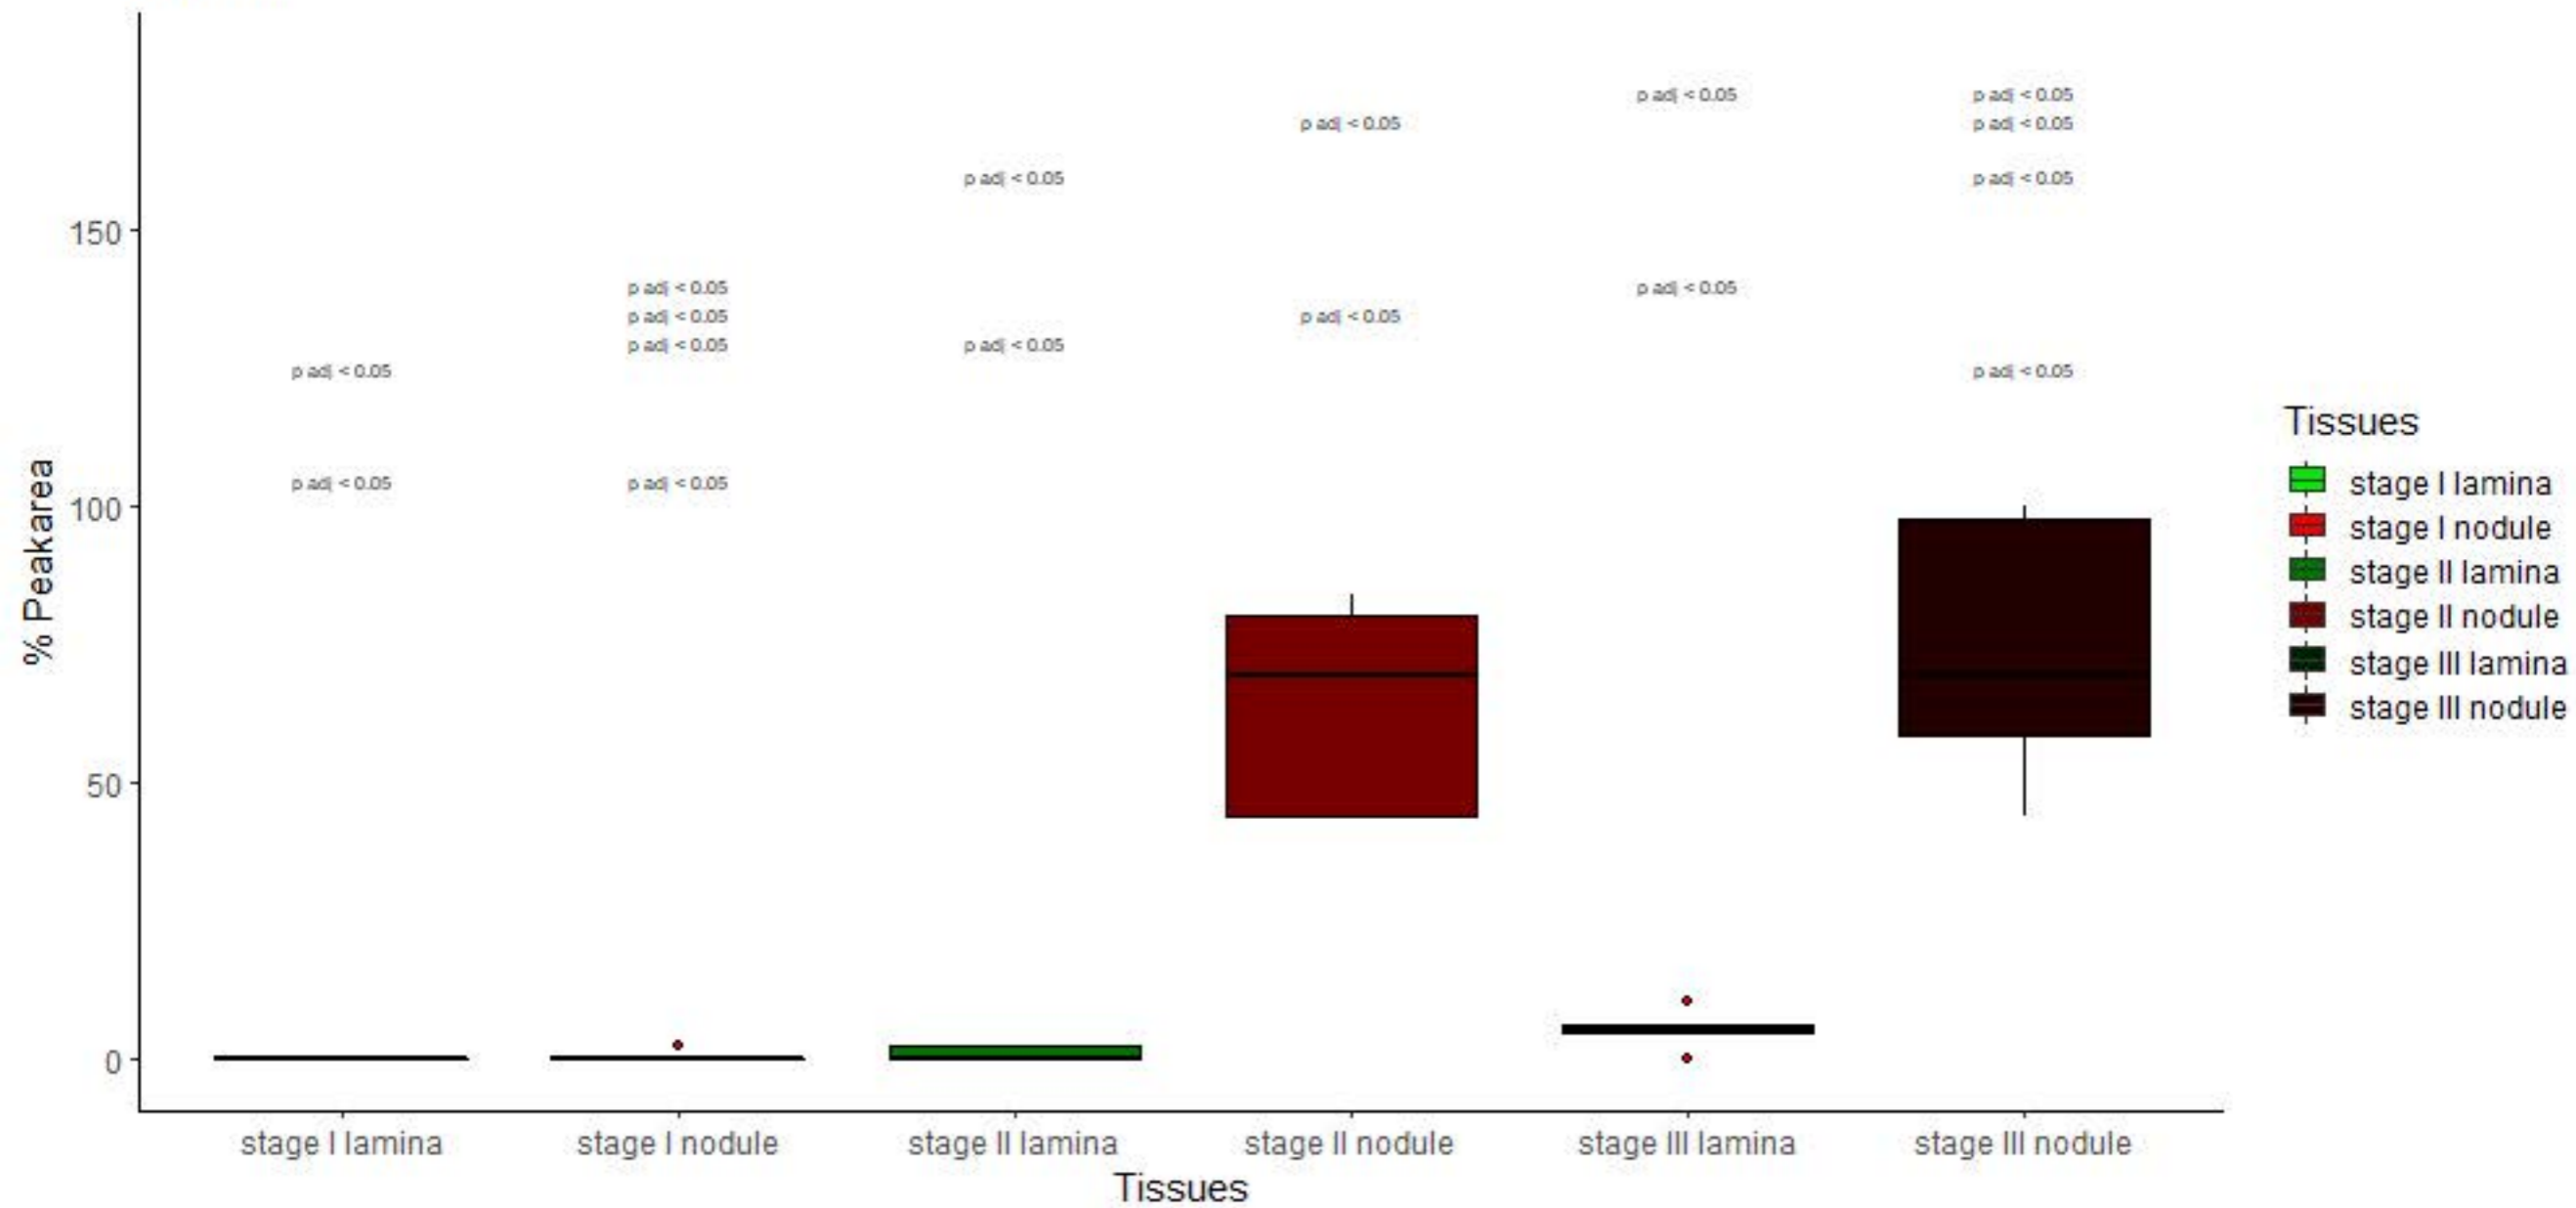

NA 91

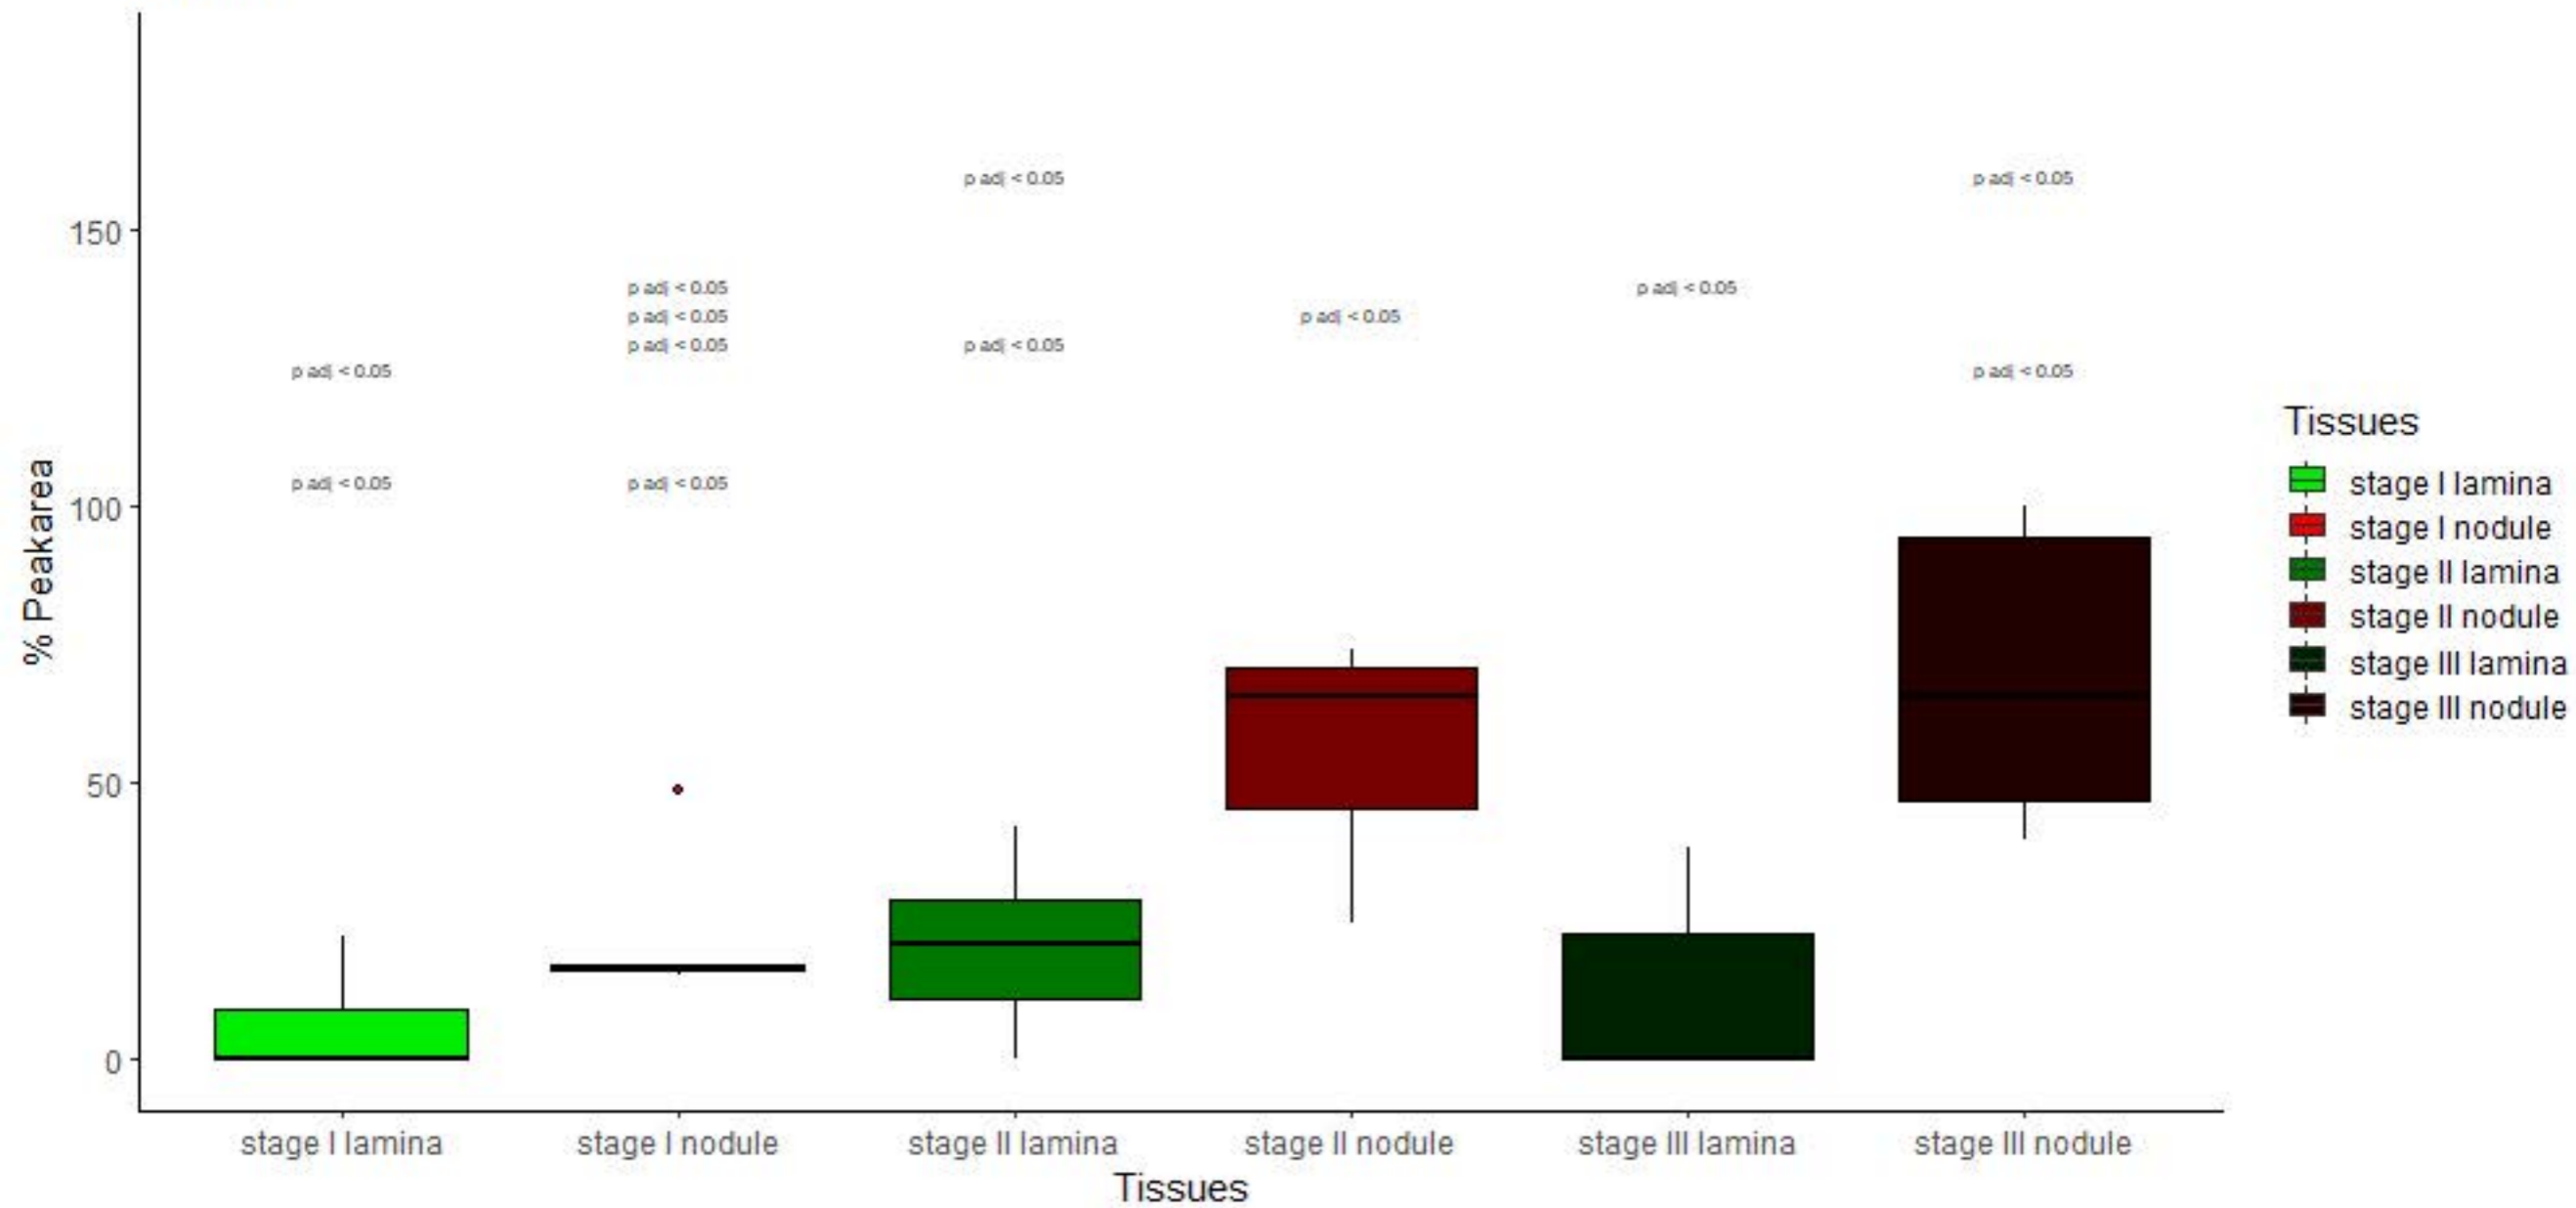

NA 61

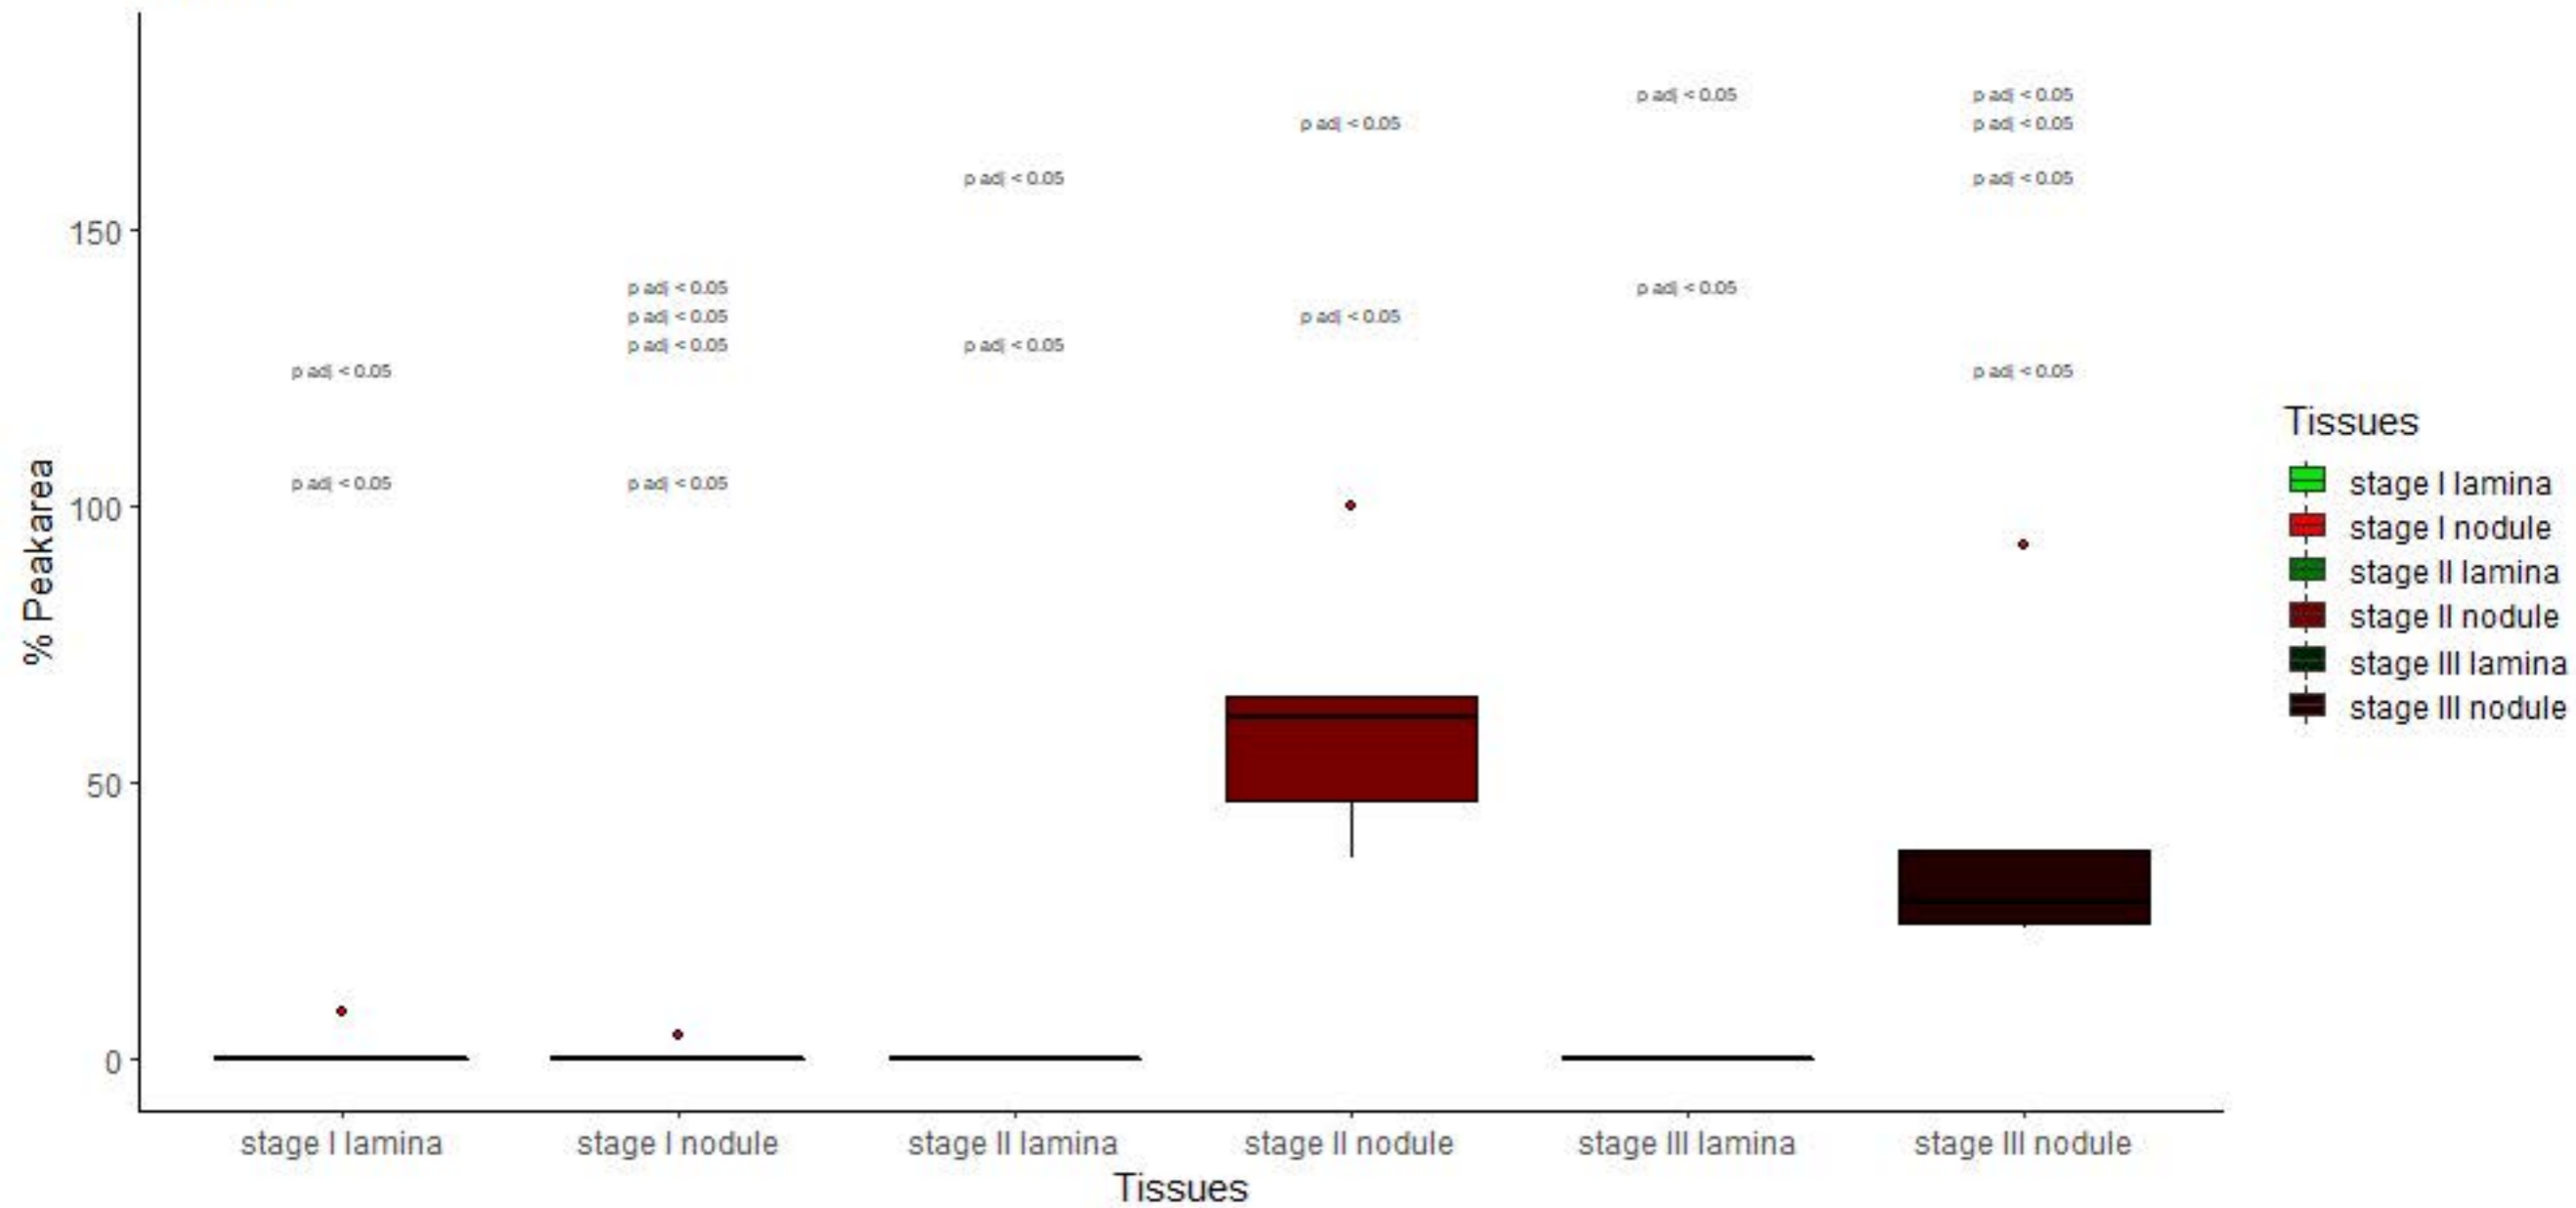

NA 62

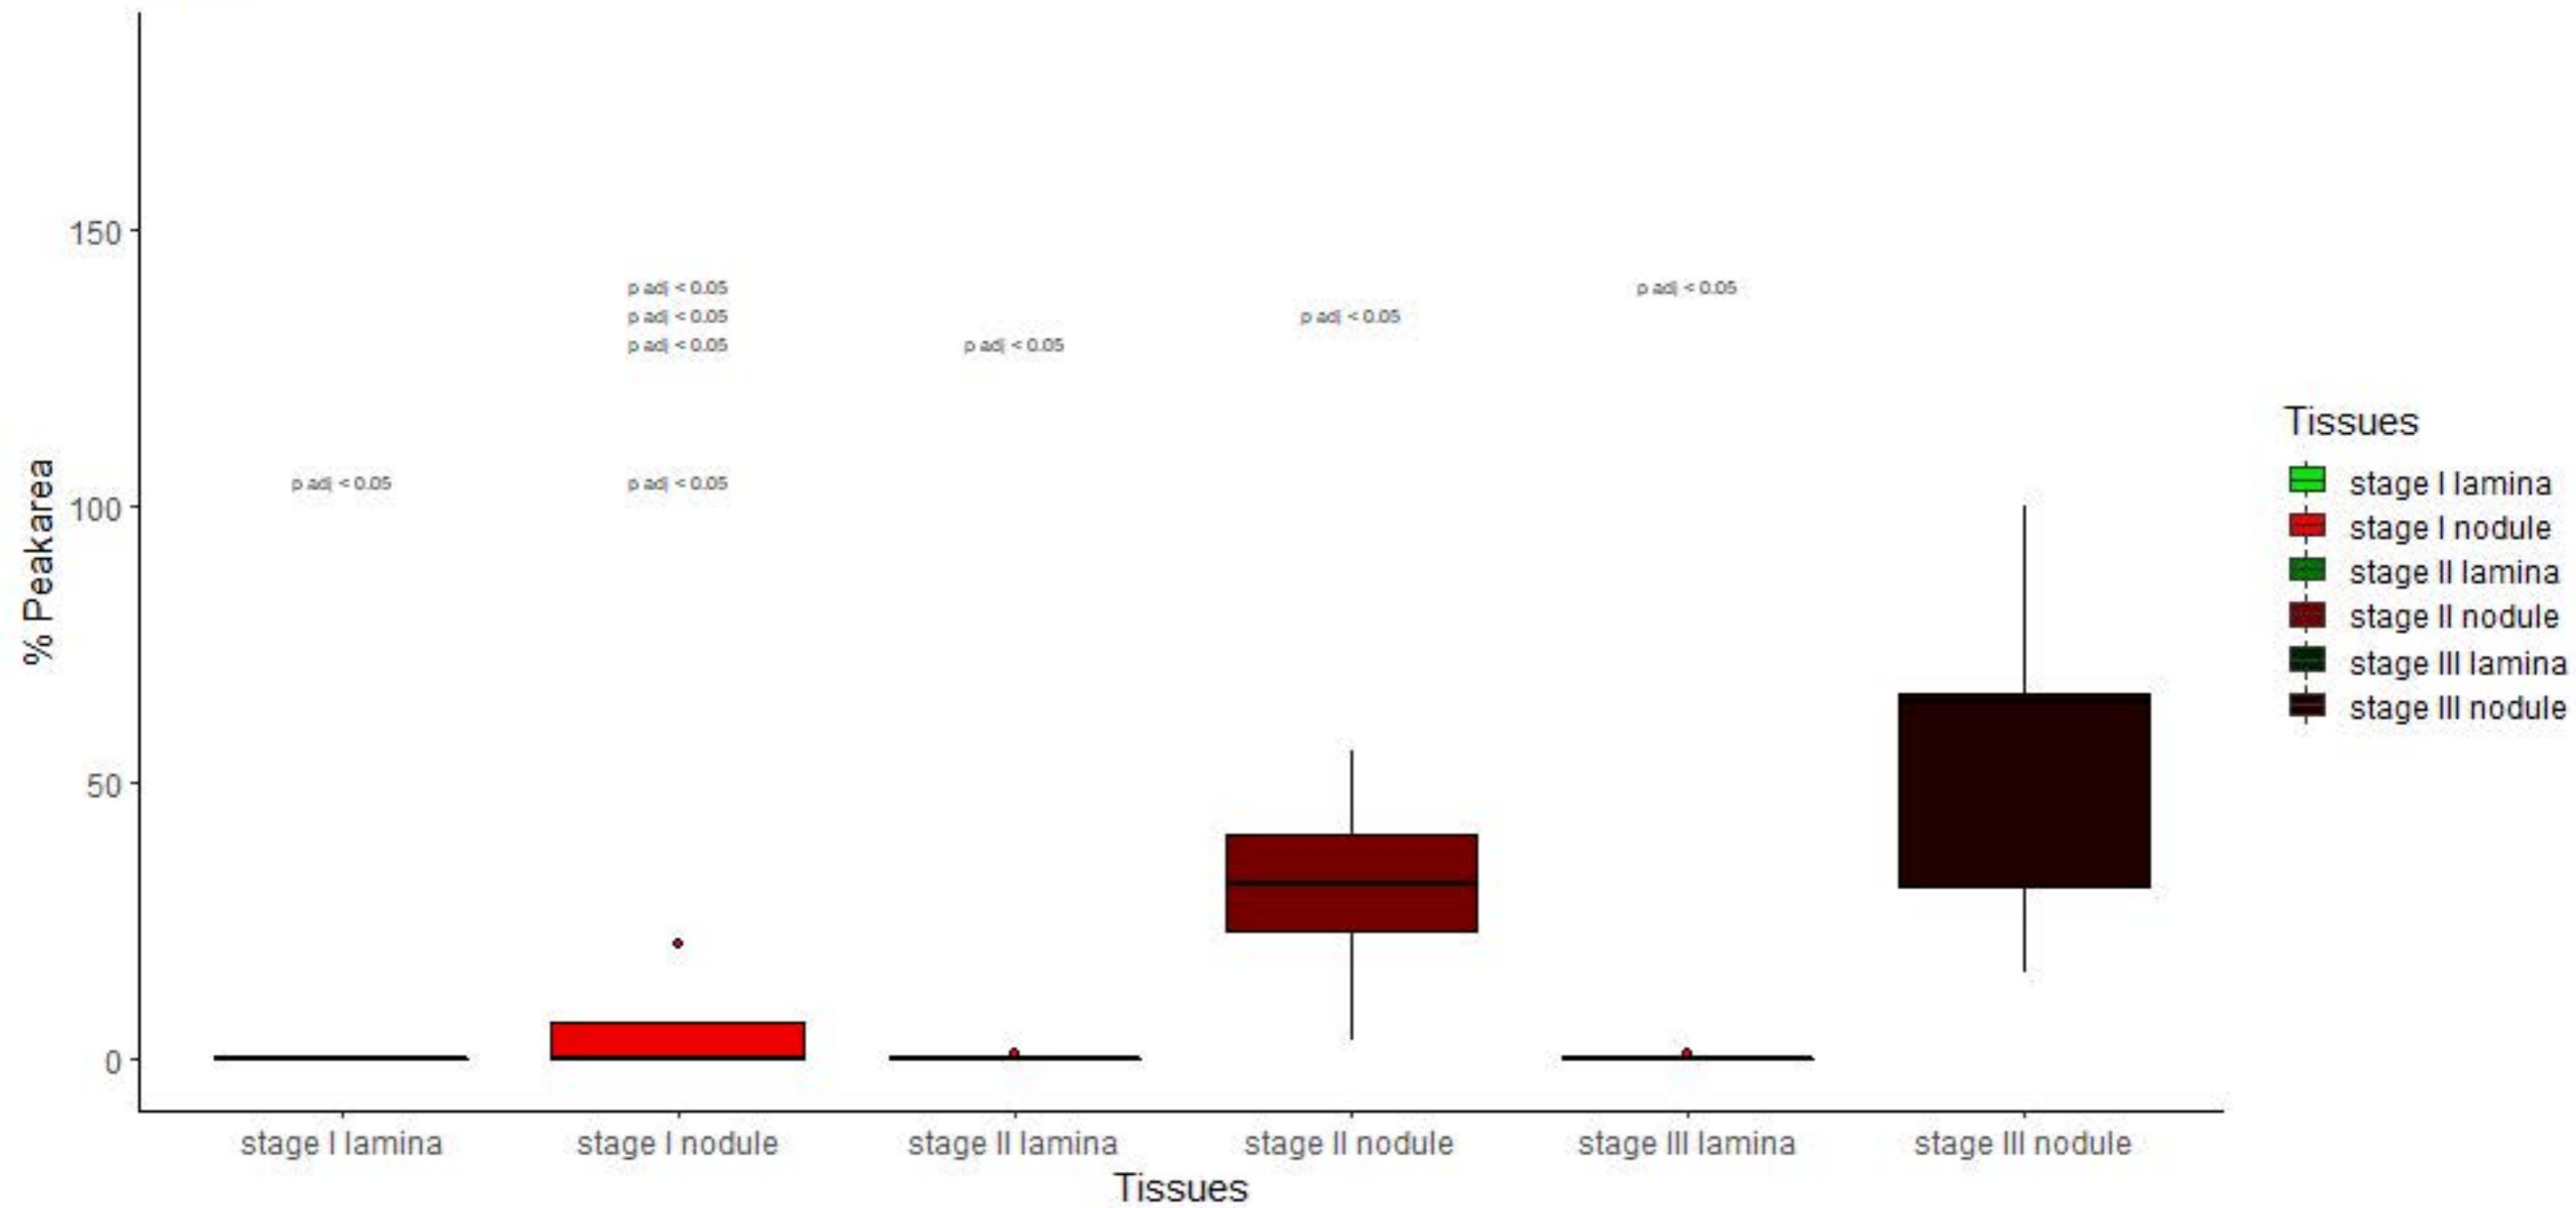

NA 63

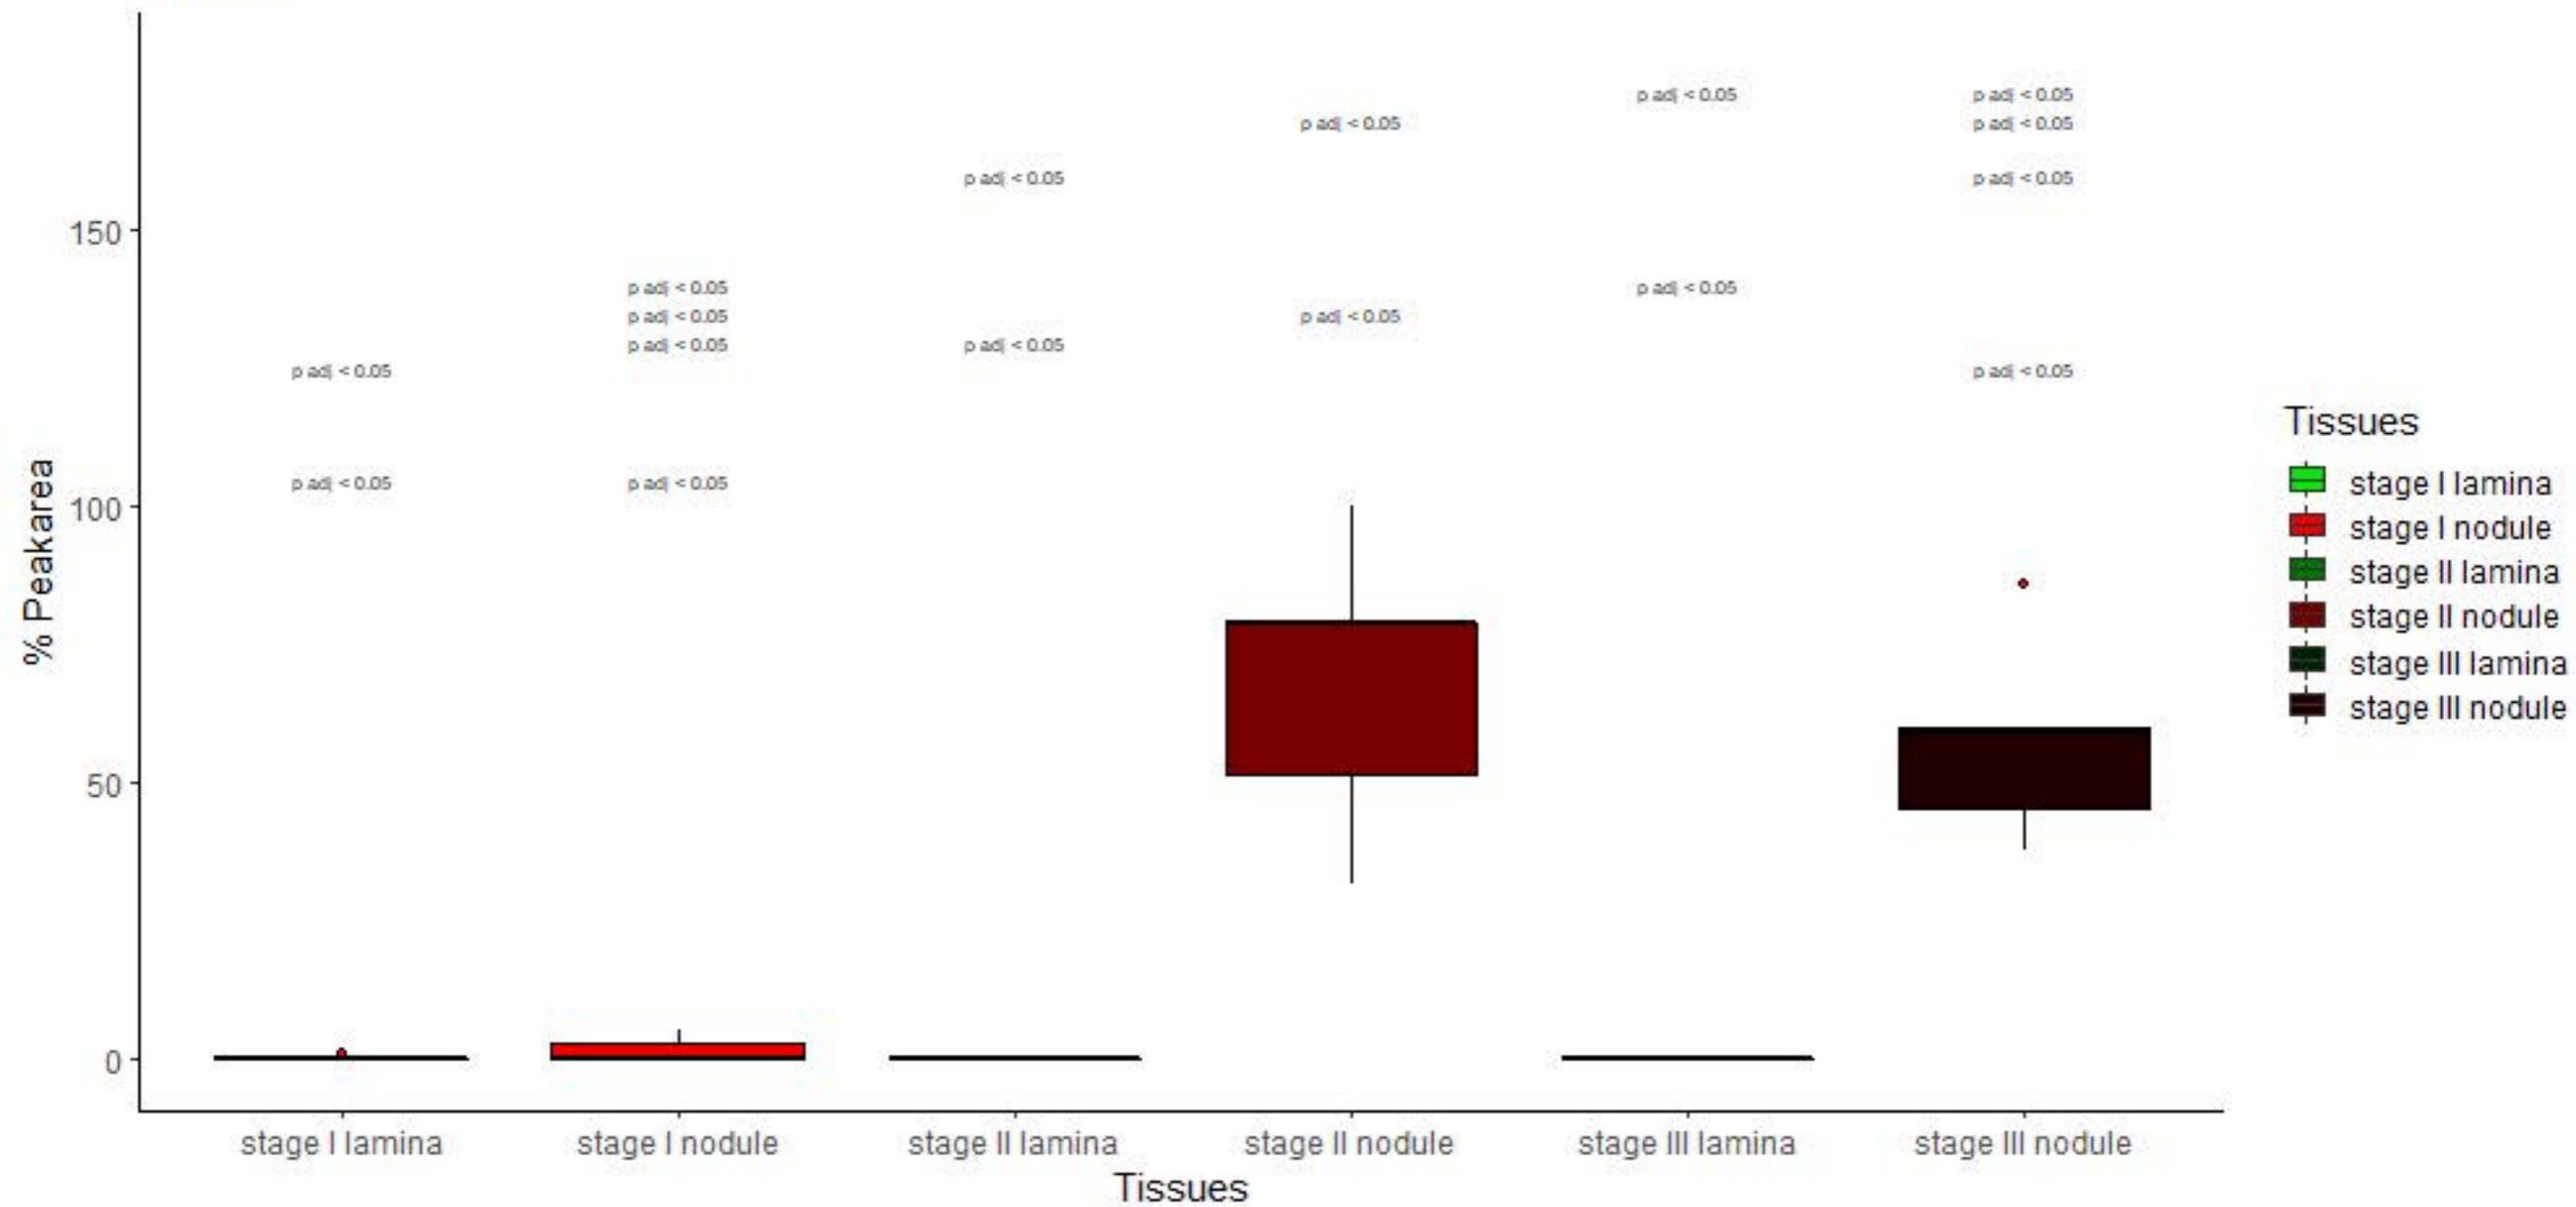



NA 64

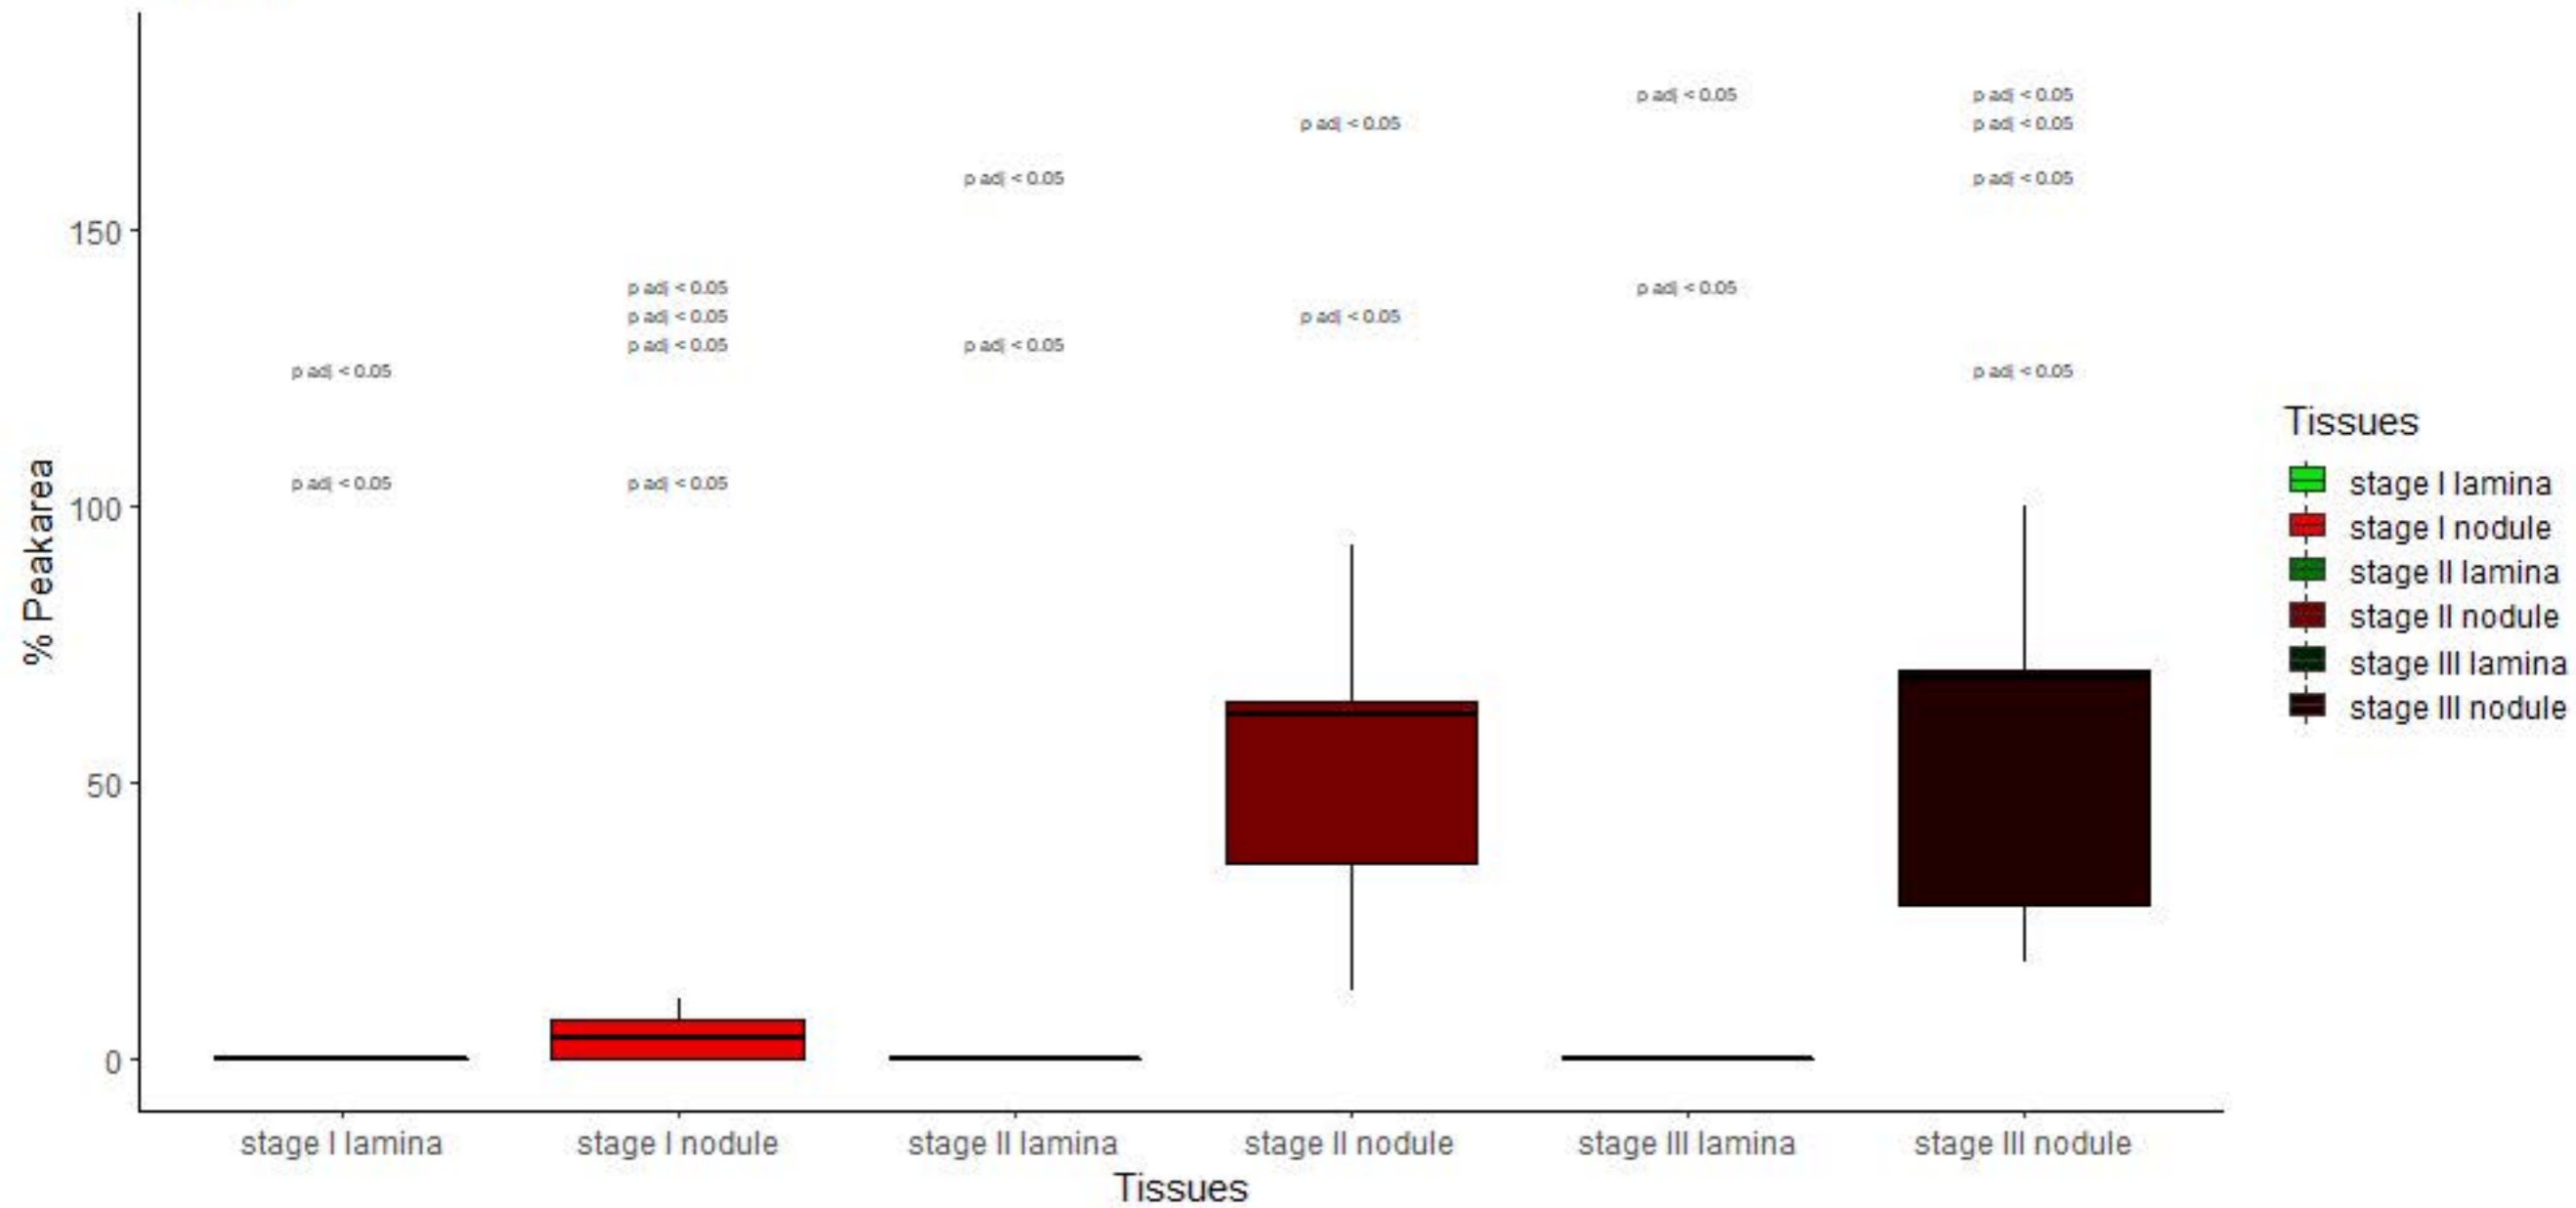

NA 70

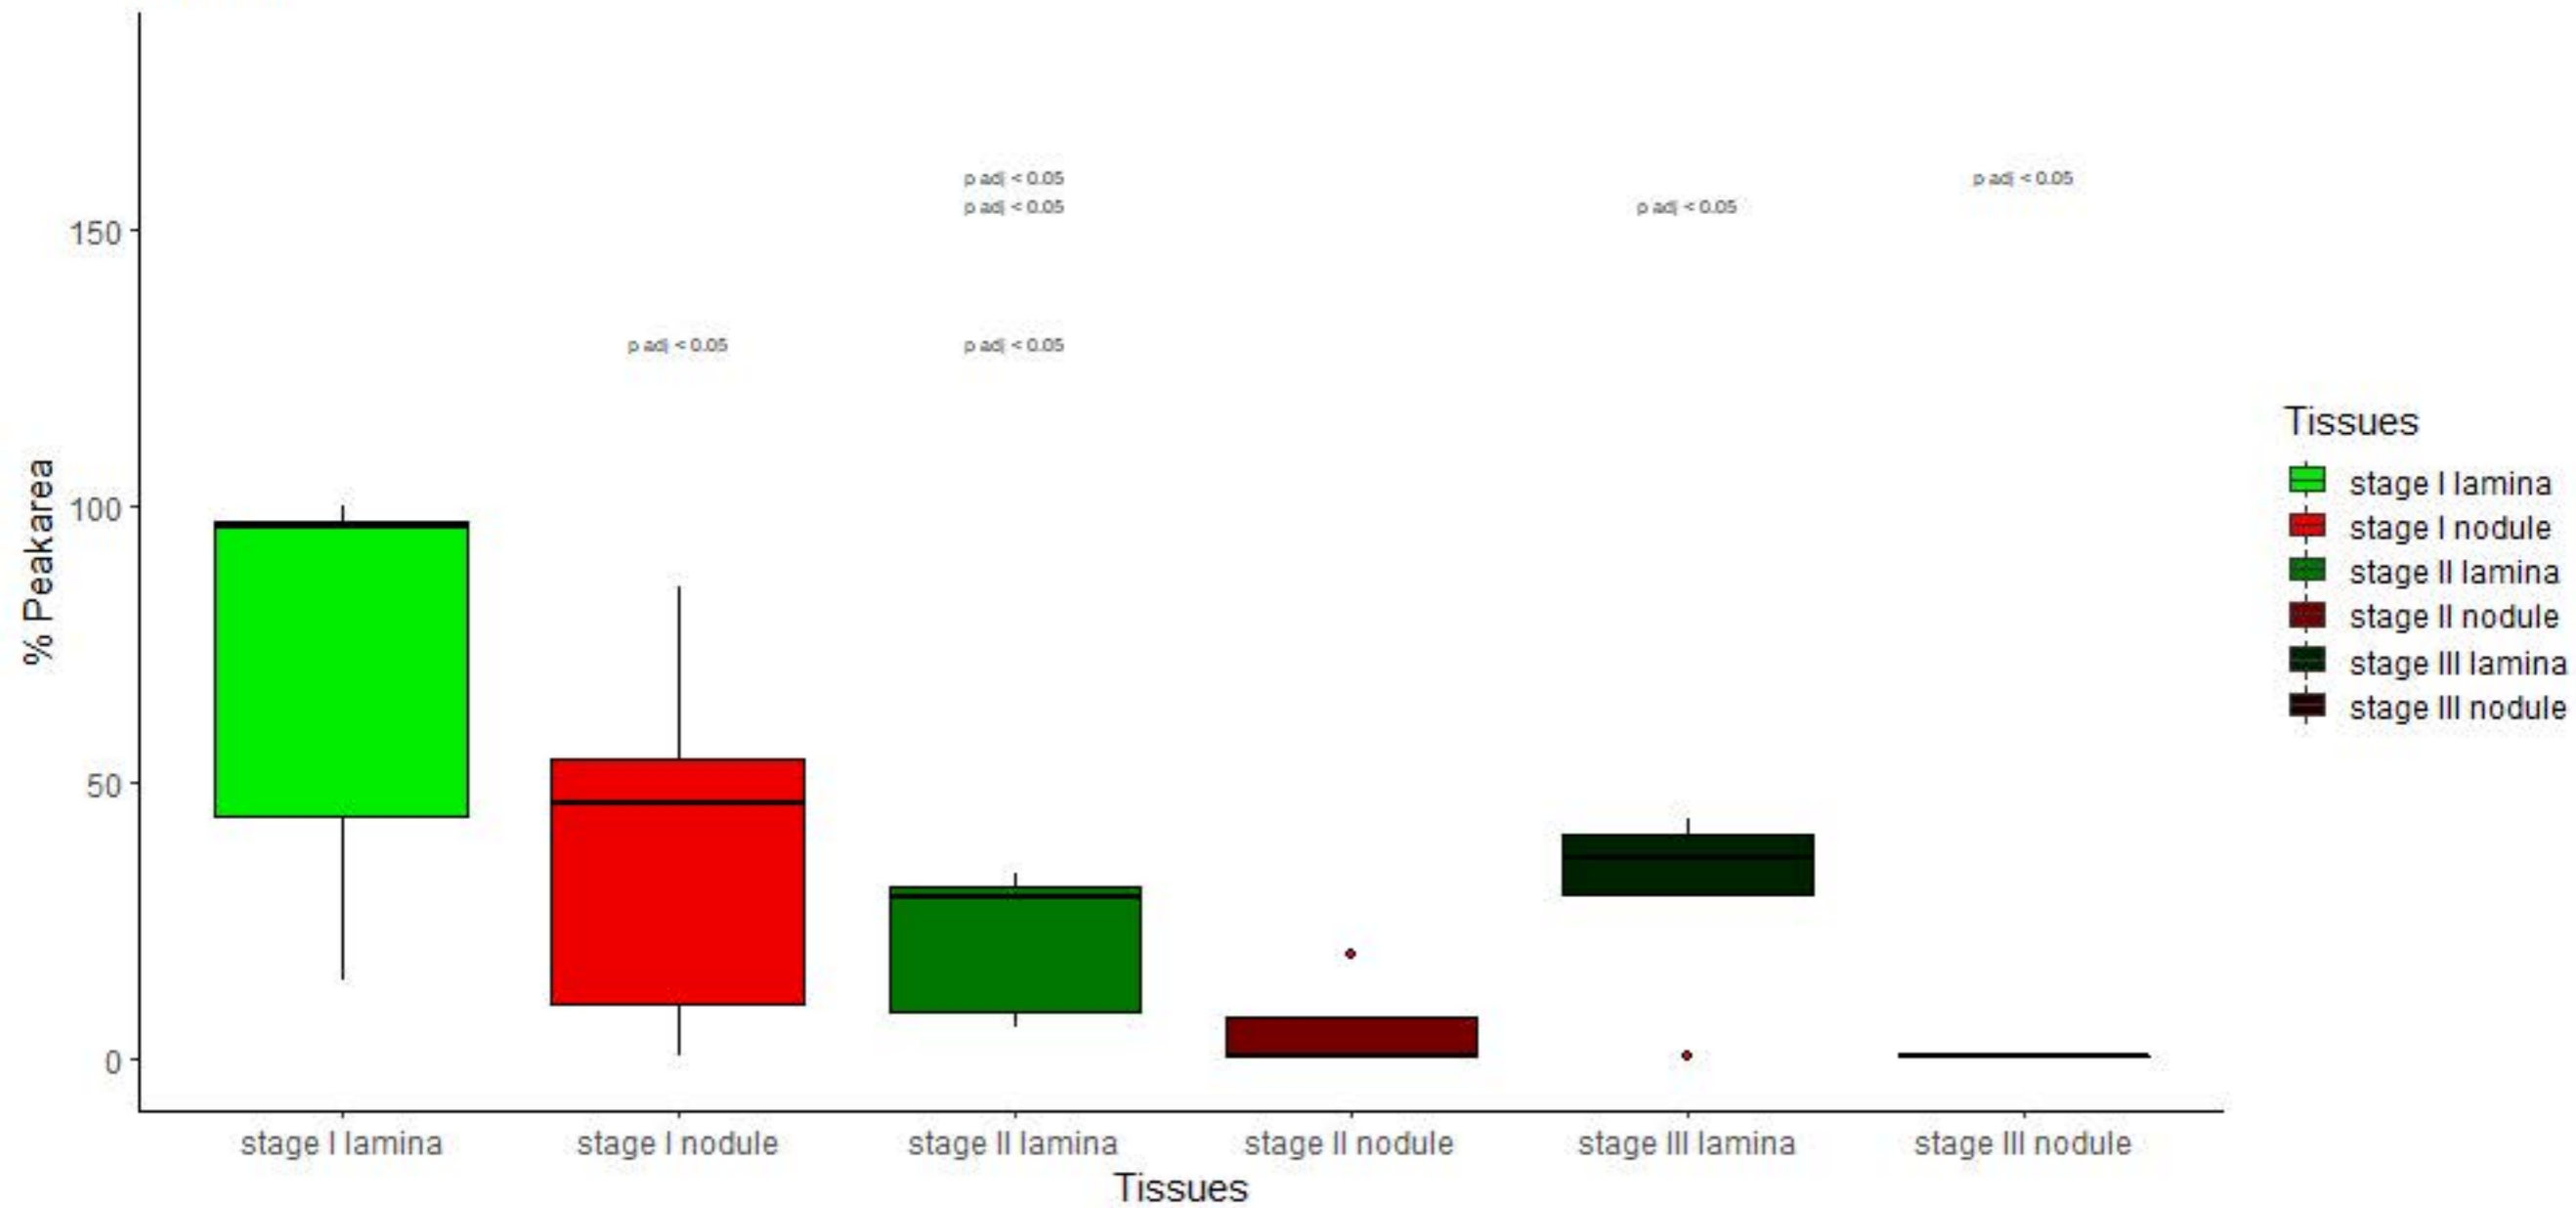

NA 74

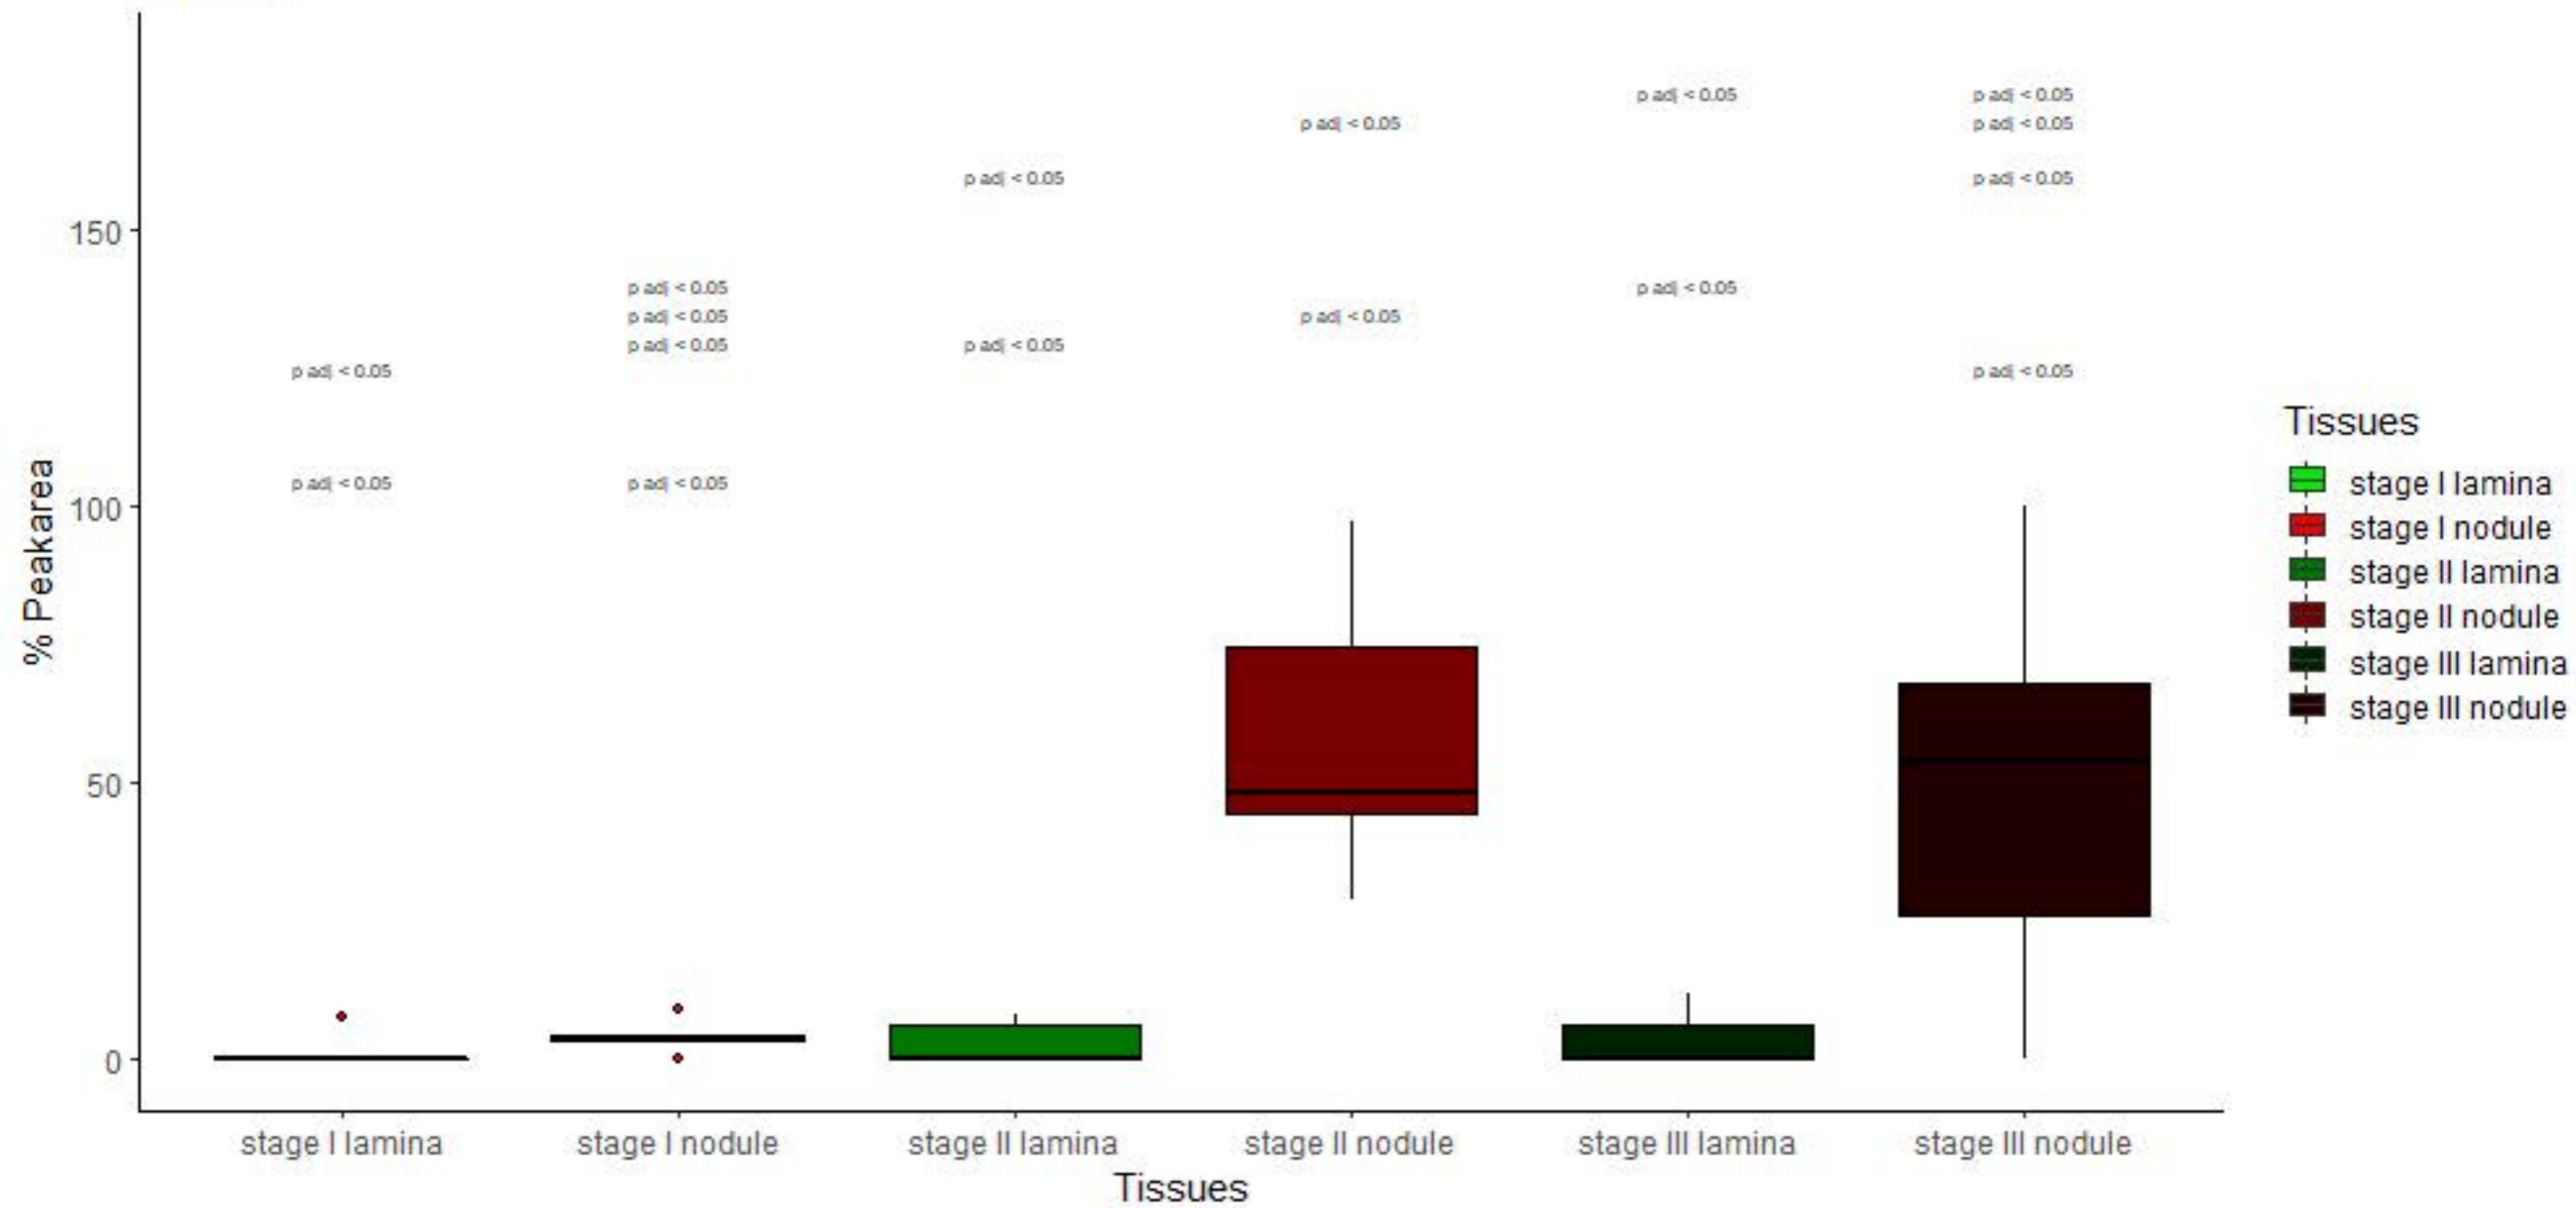

NA 75

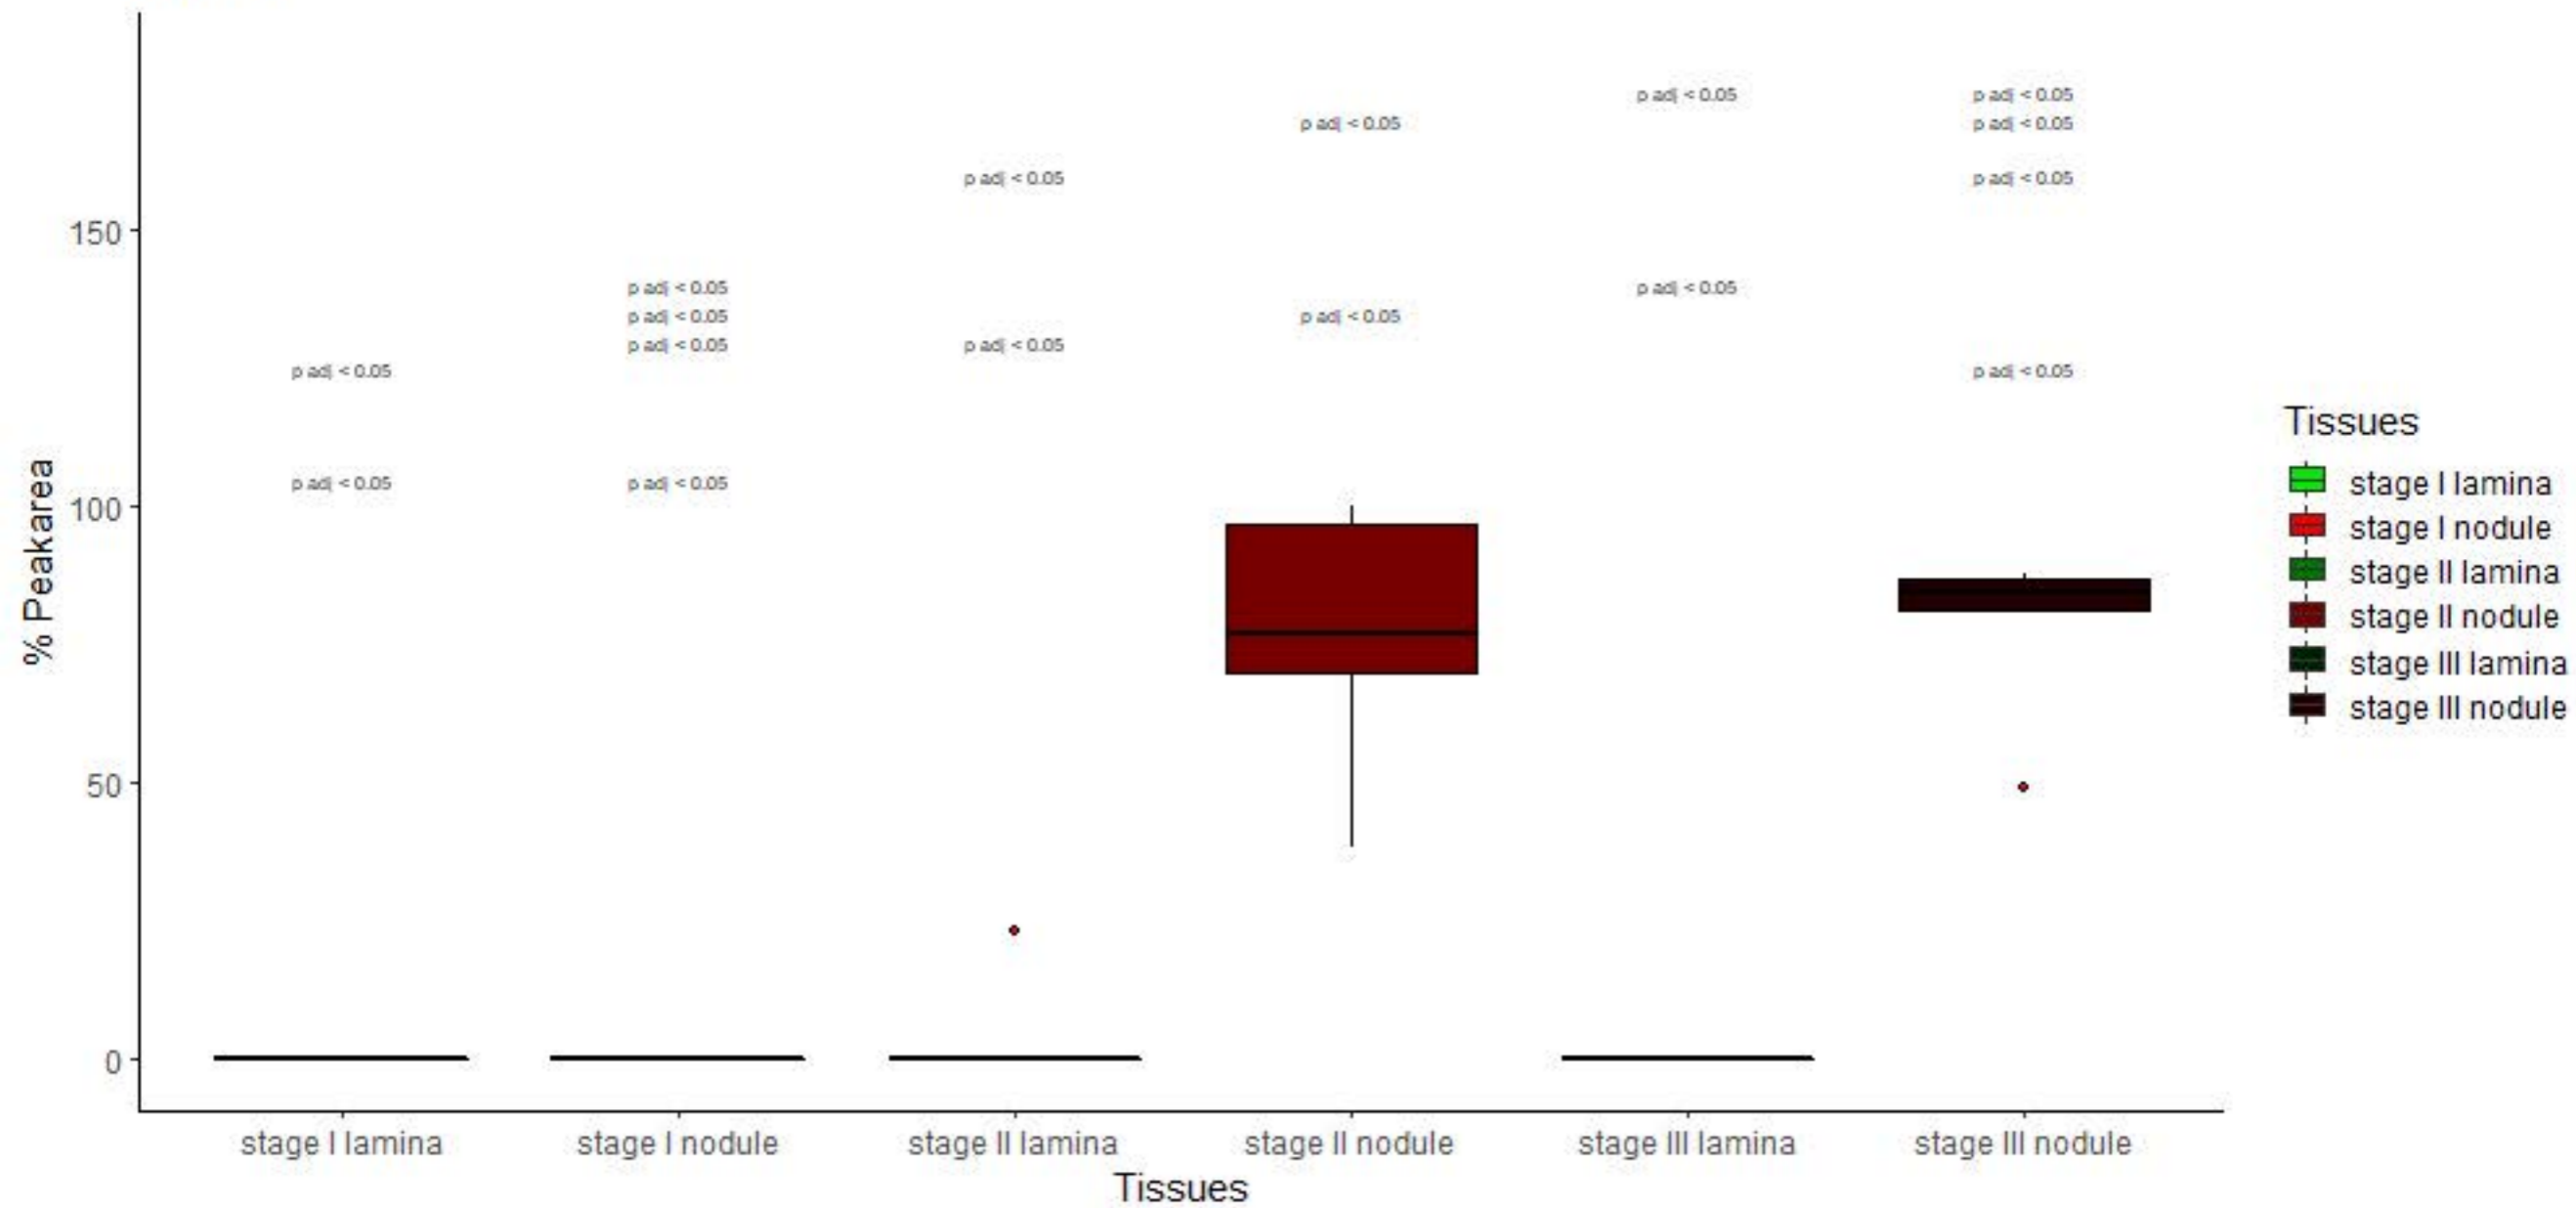

NA 76

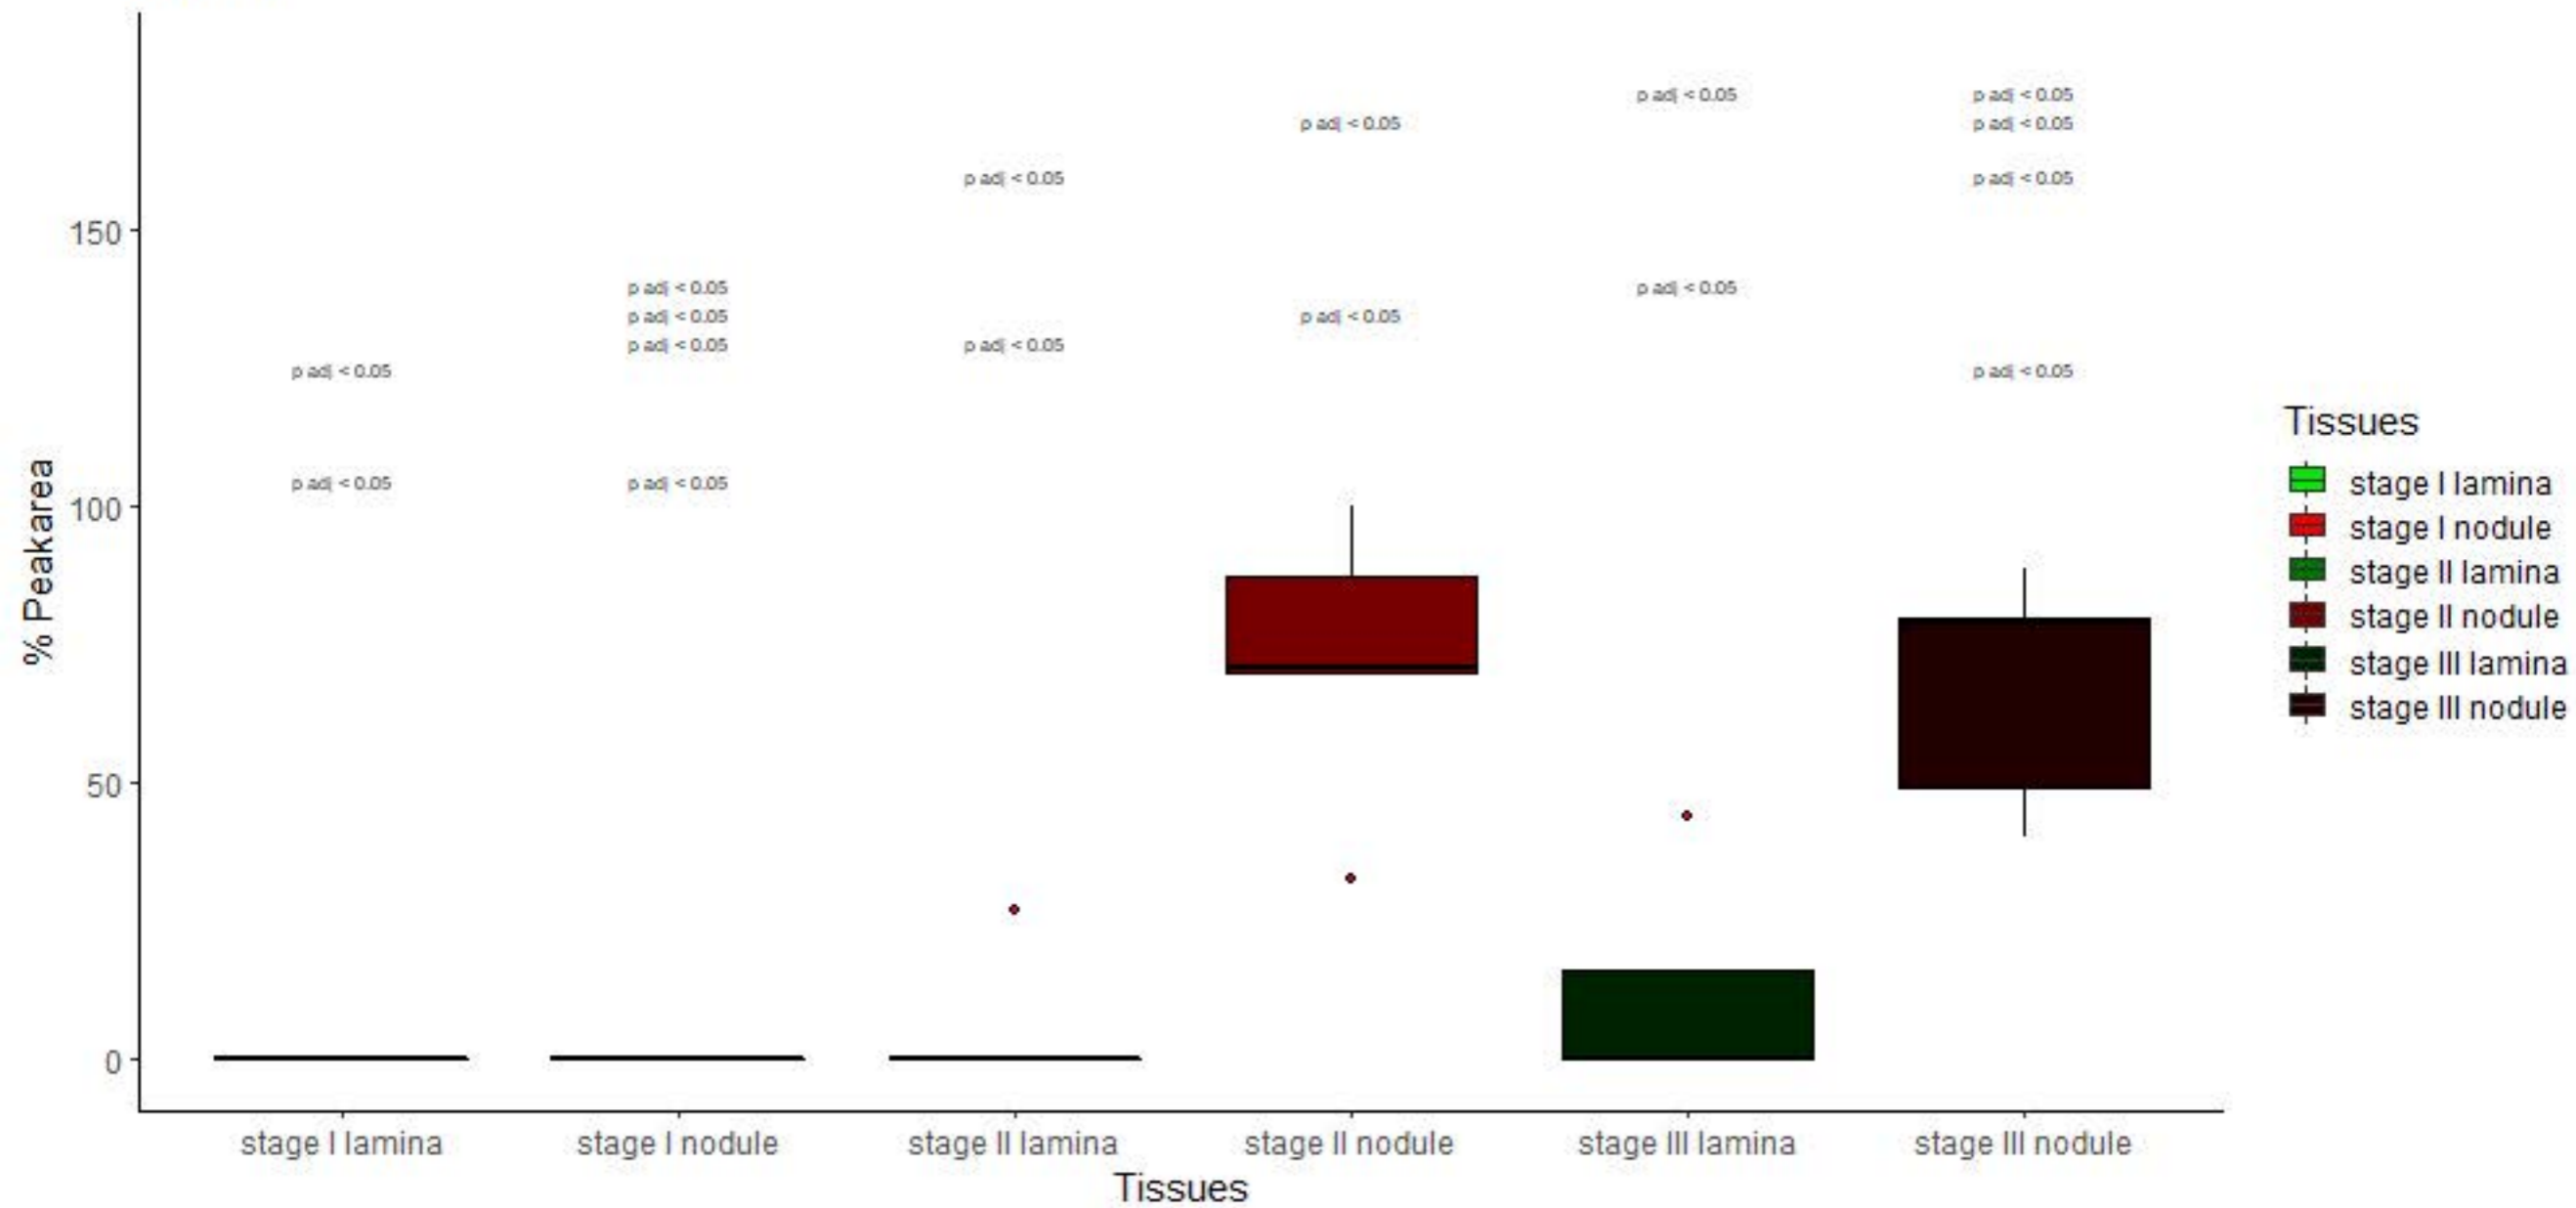

NA 78

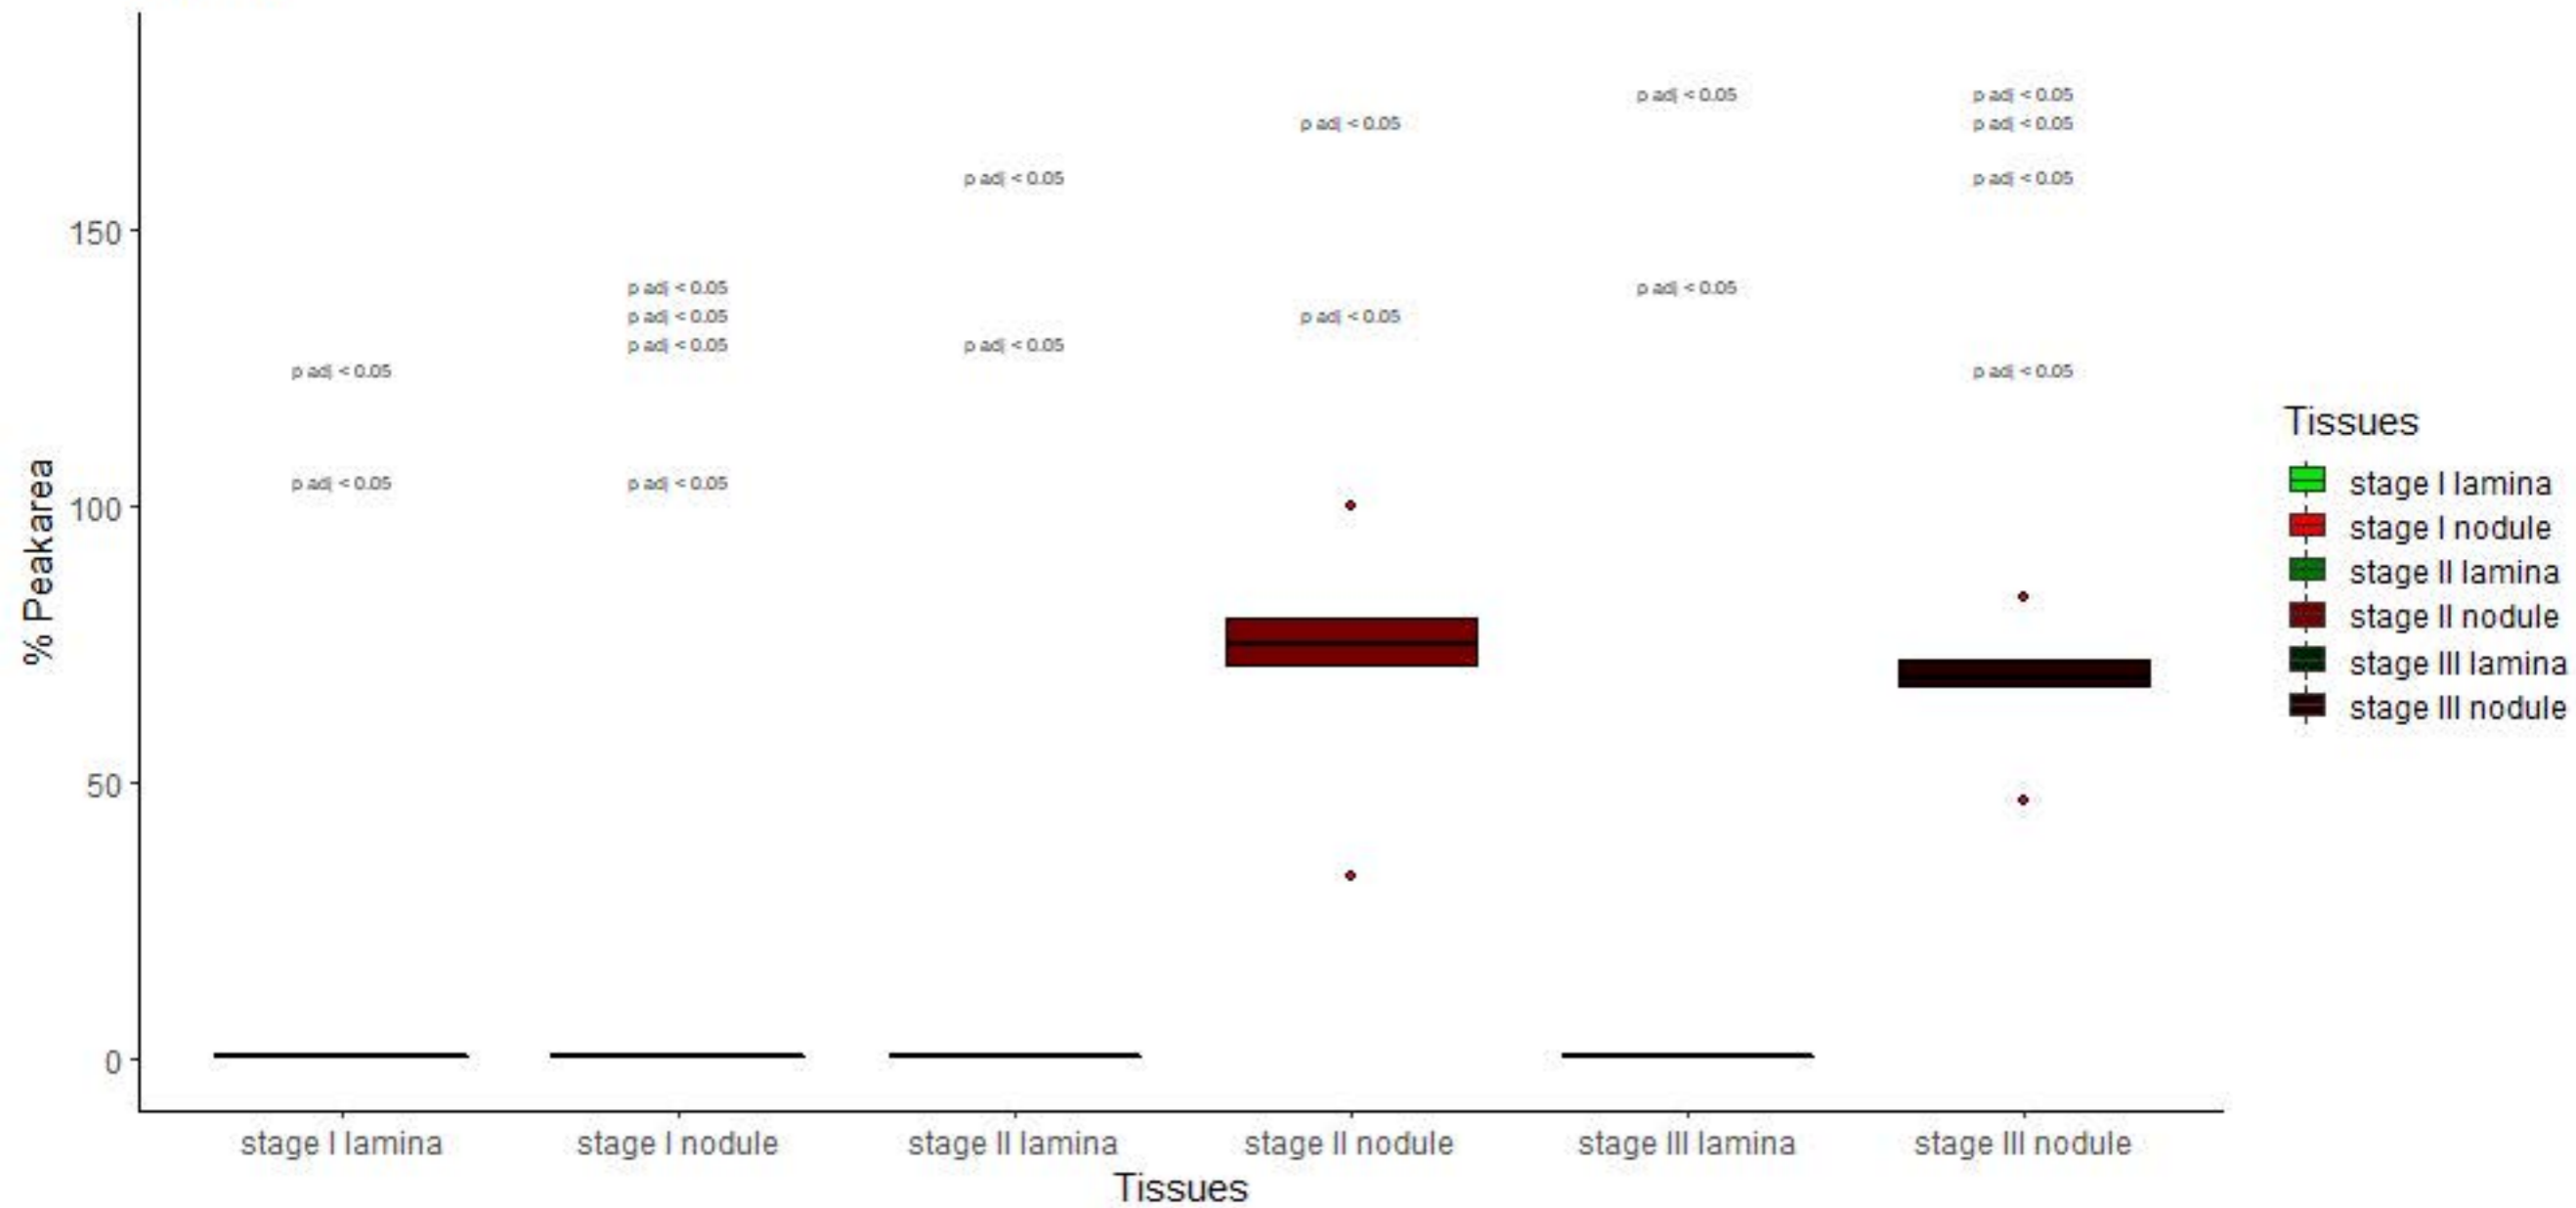

NA 79

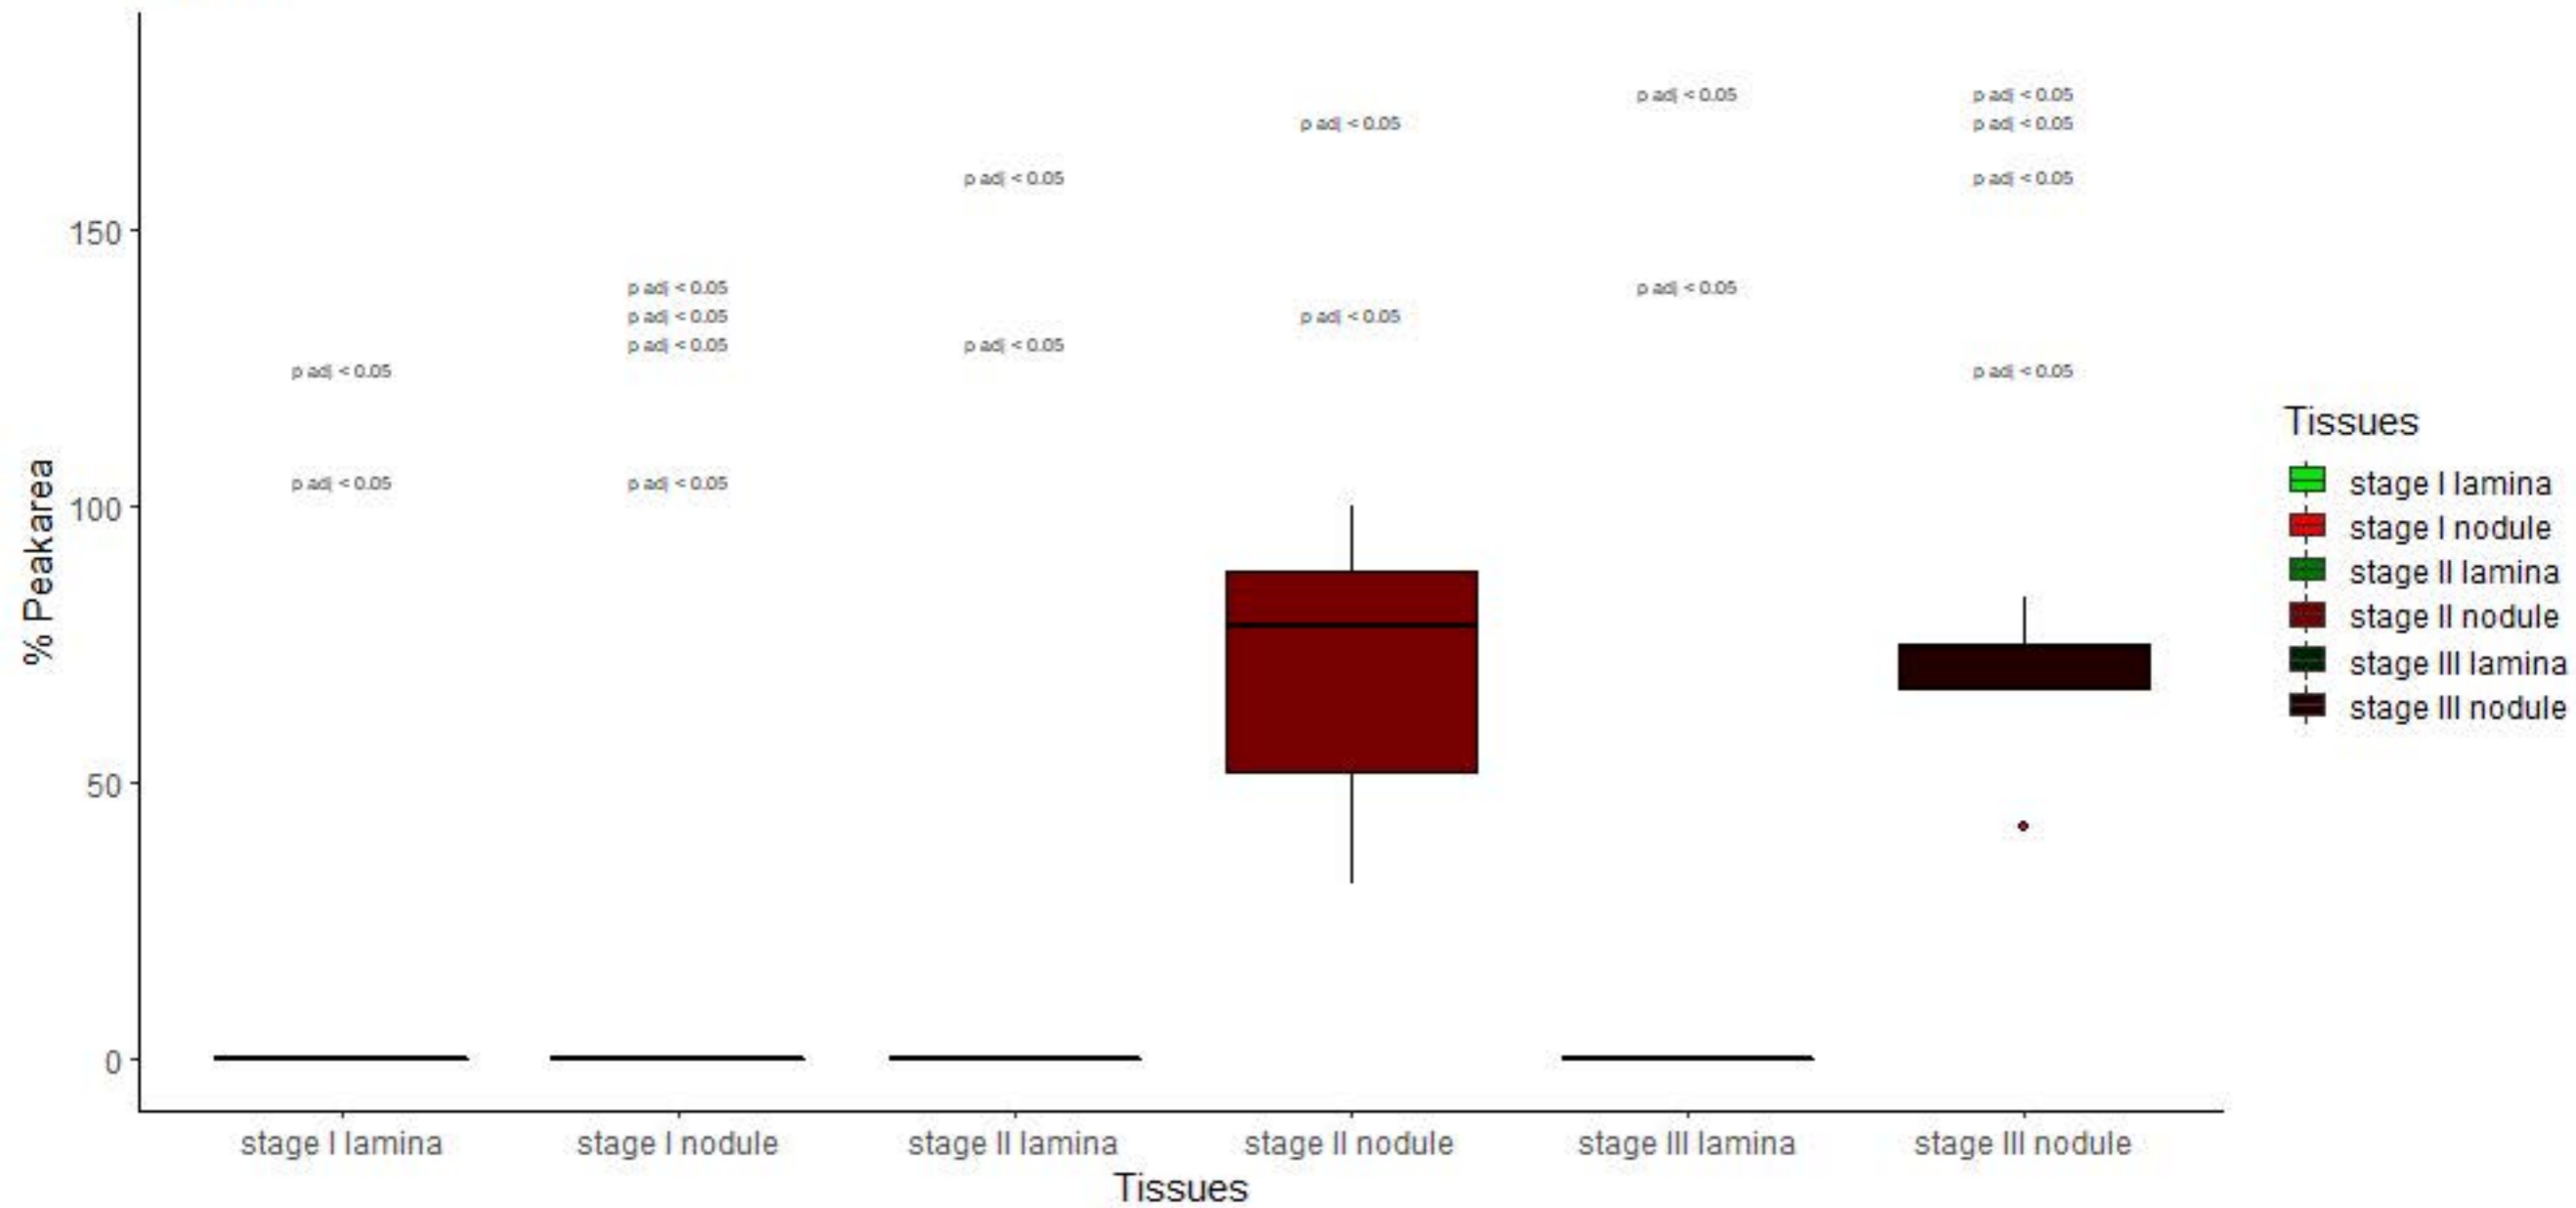

NA 81

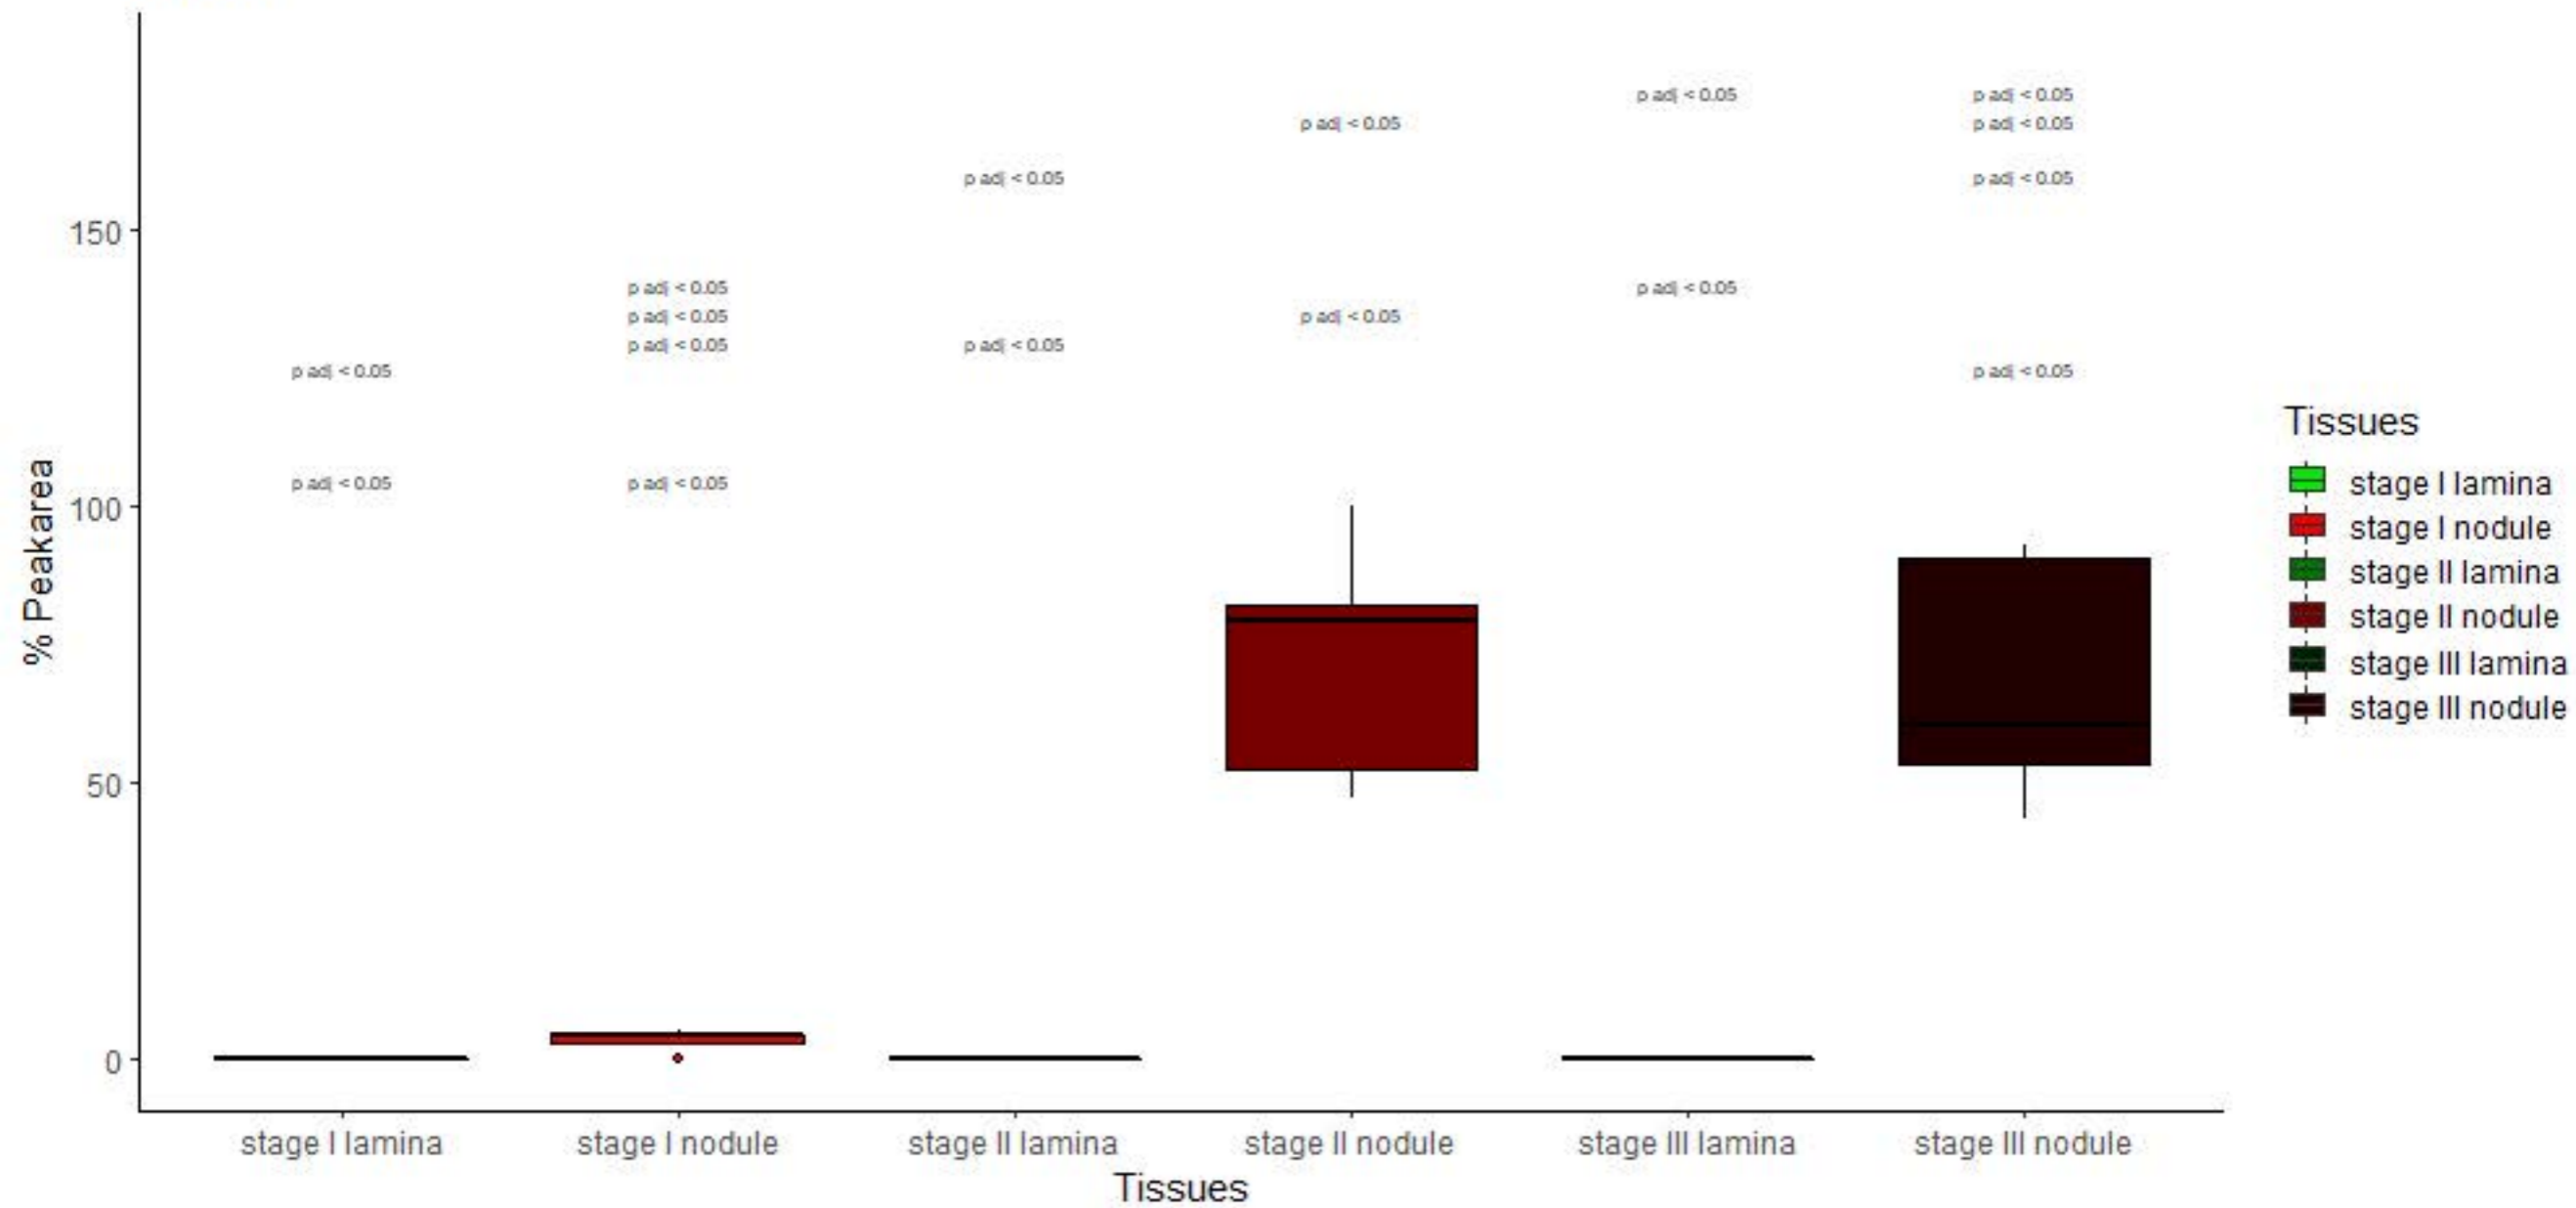



NA 85

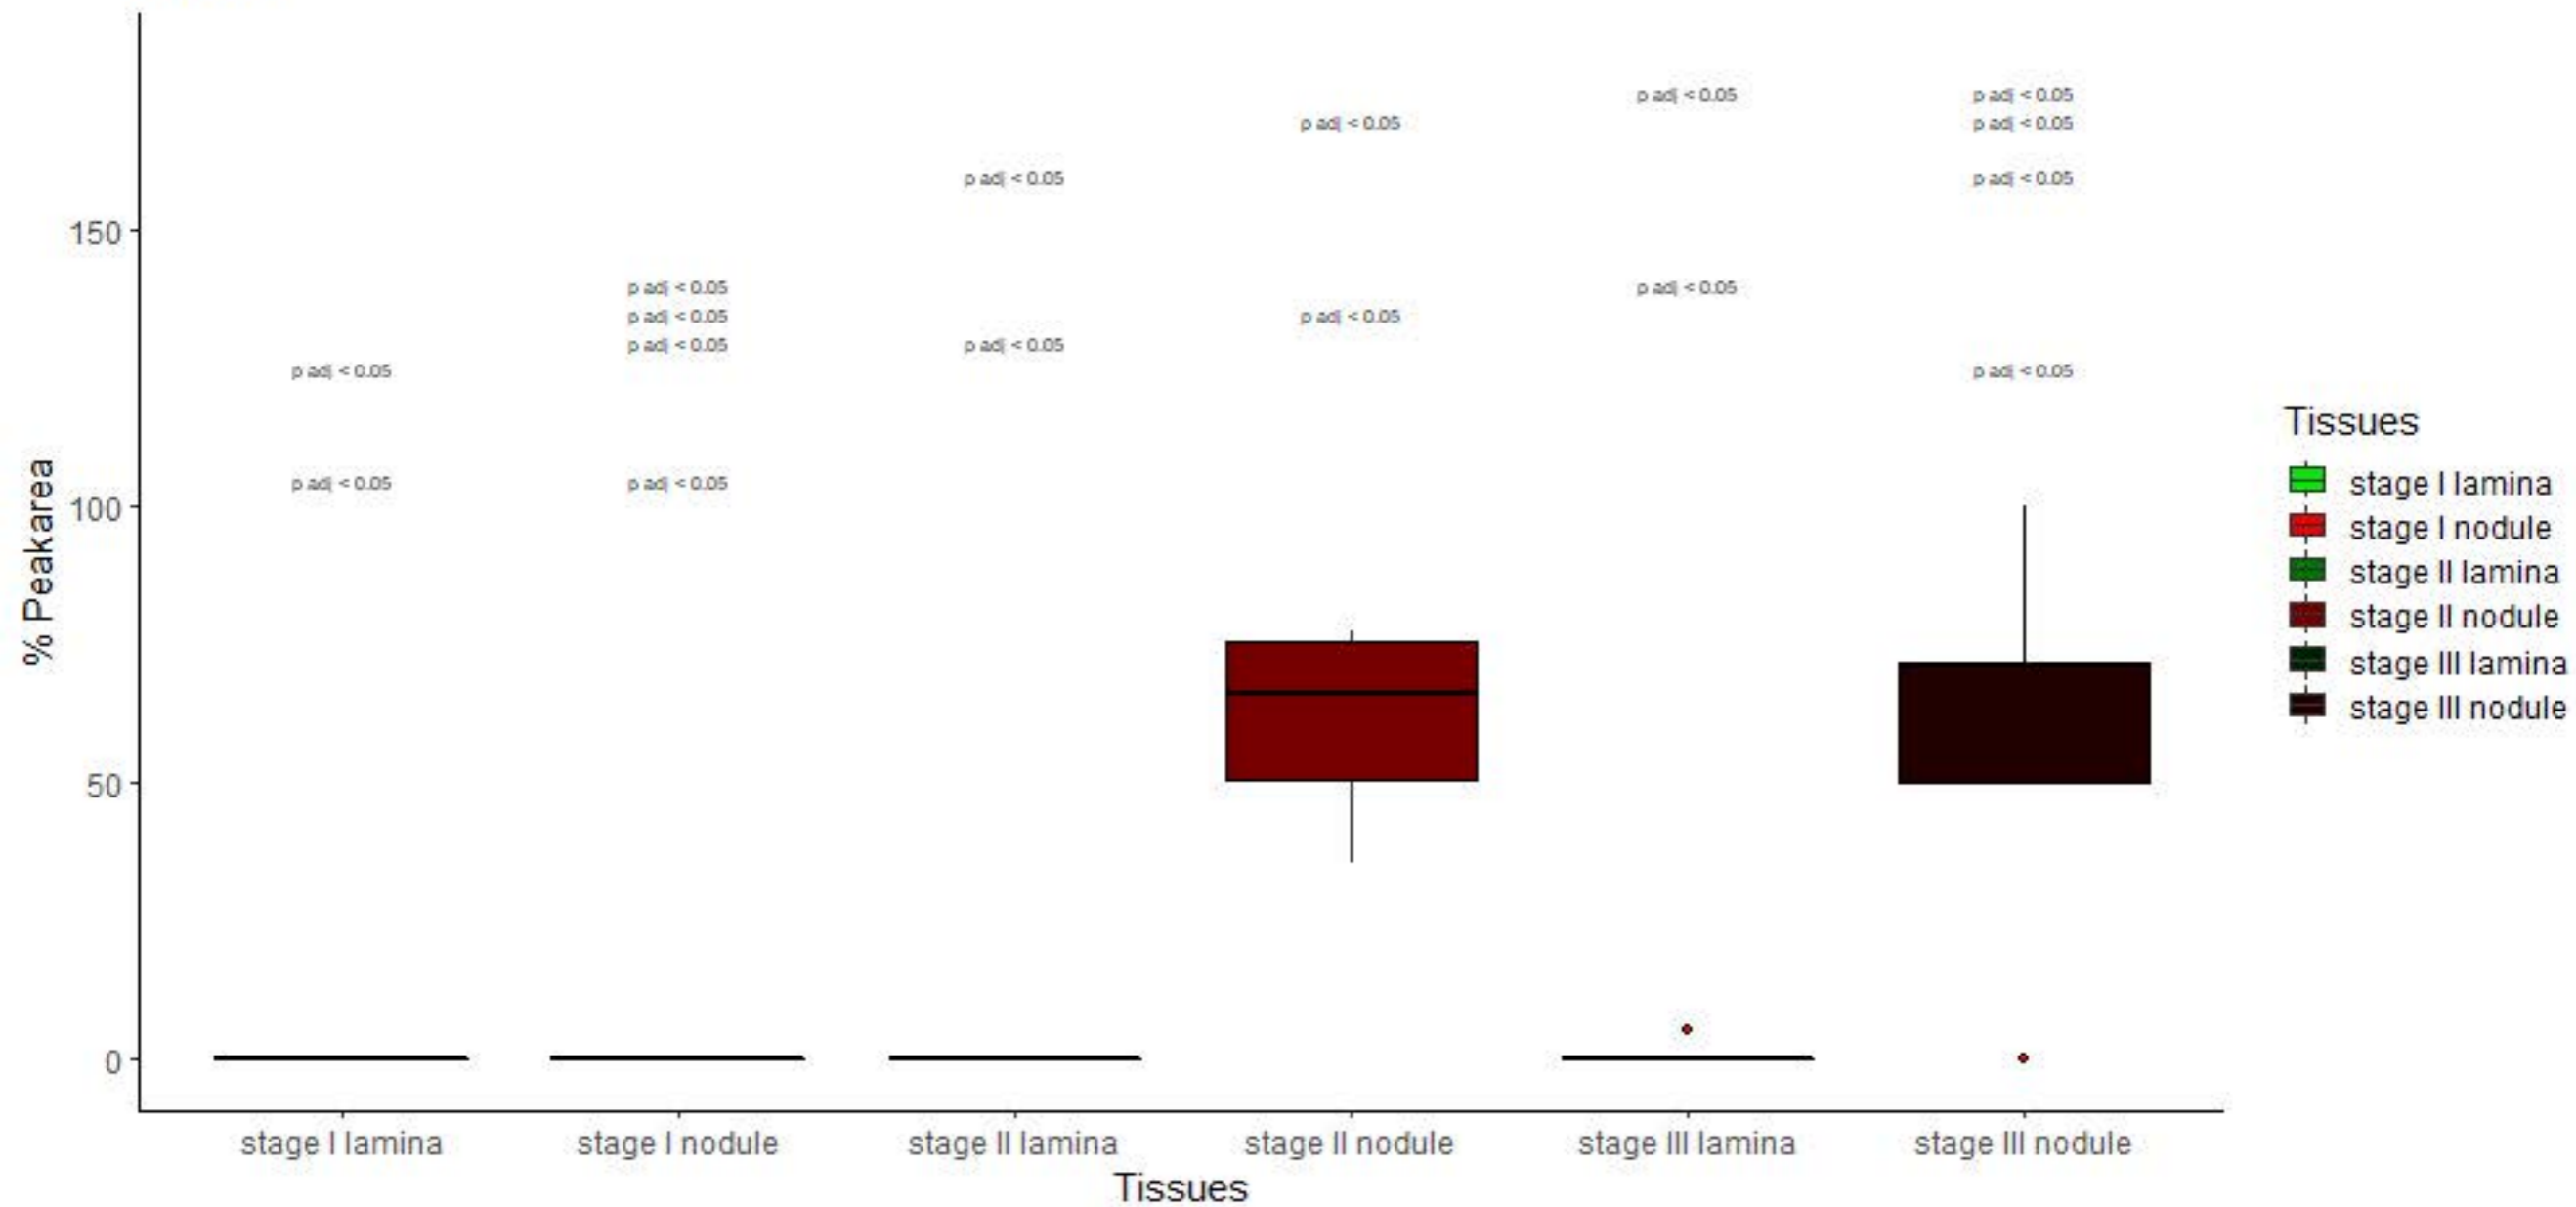

NA 86

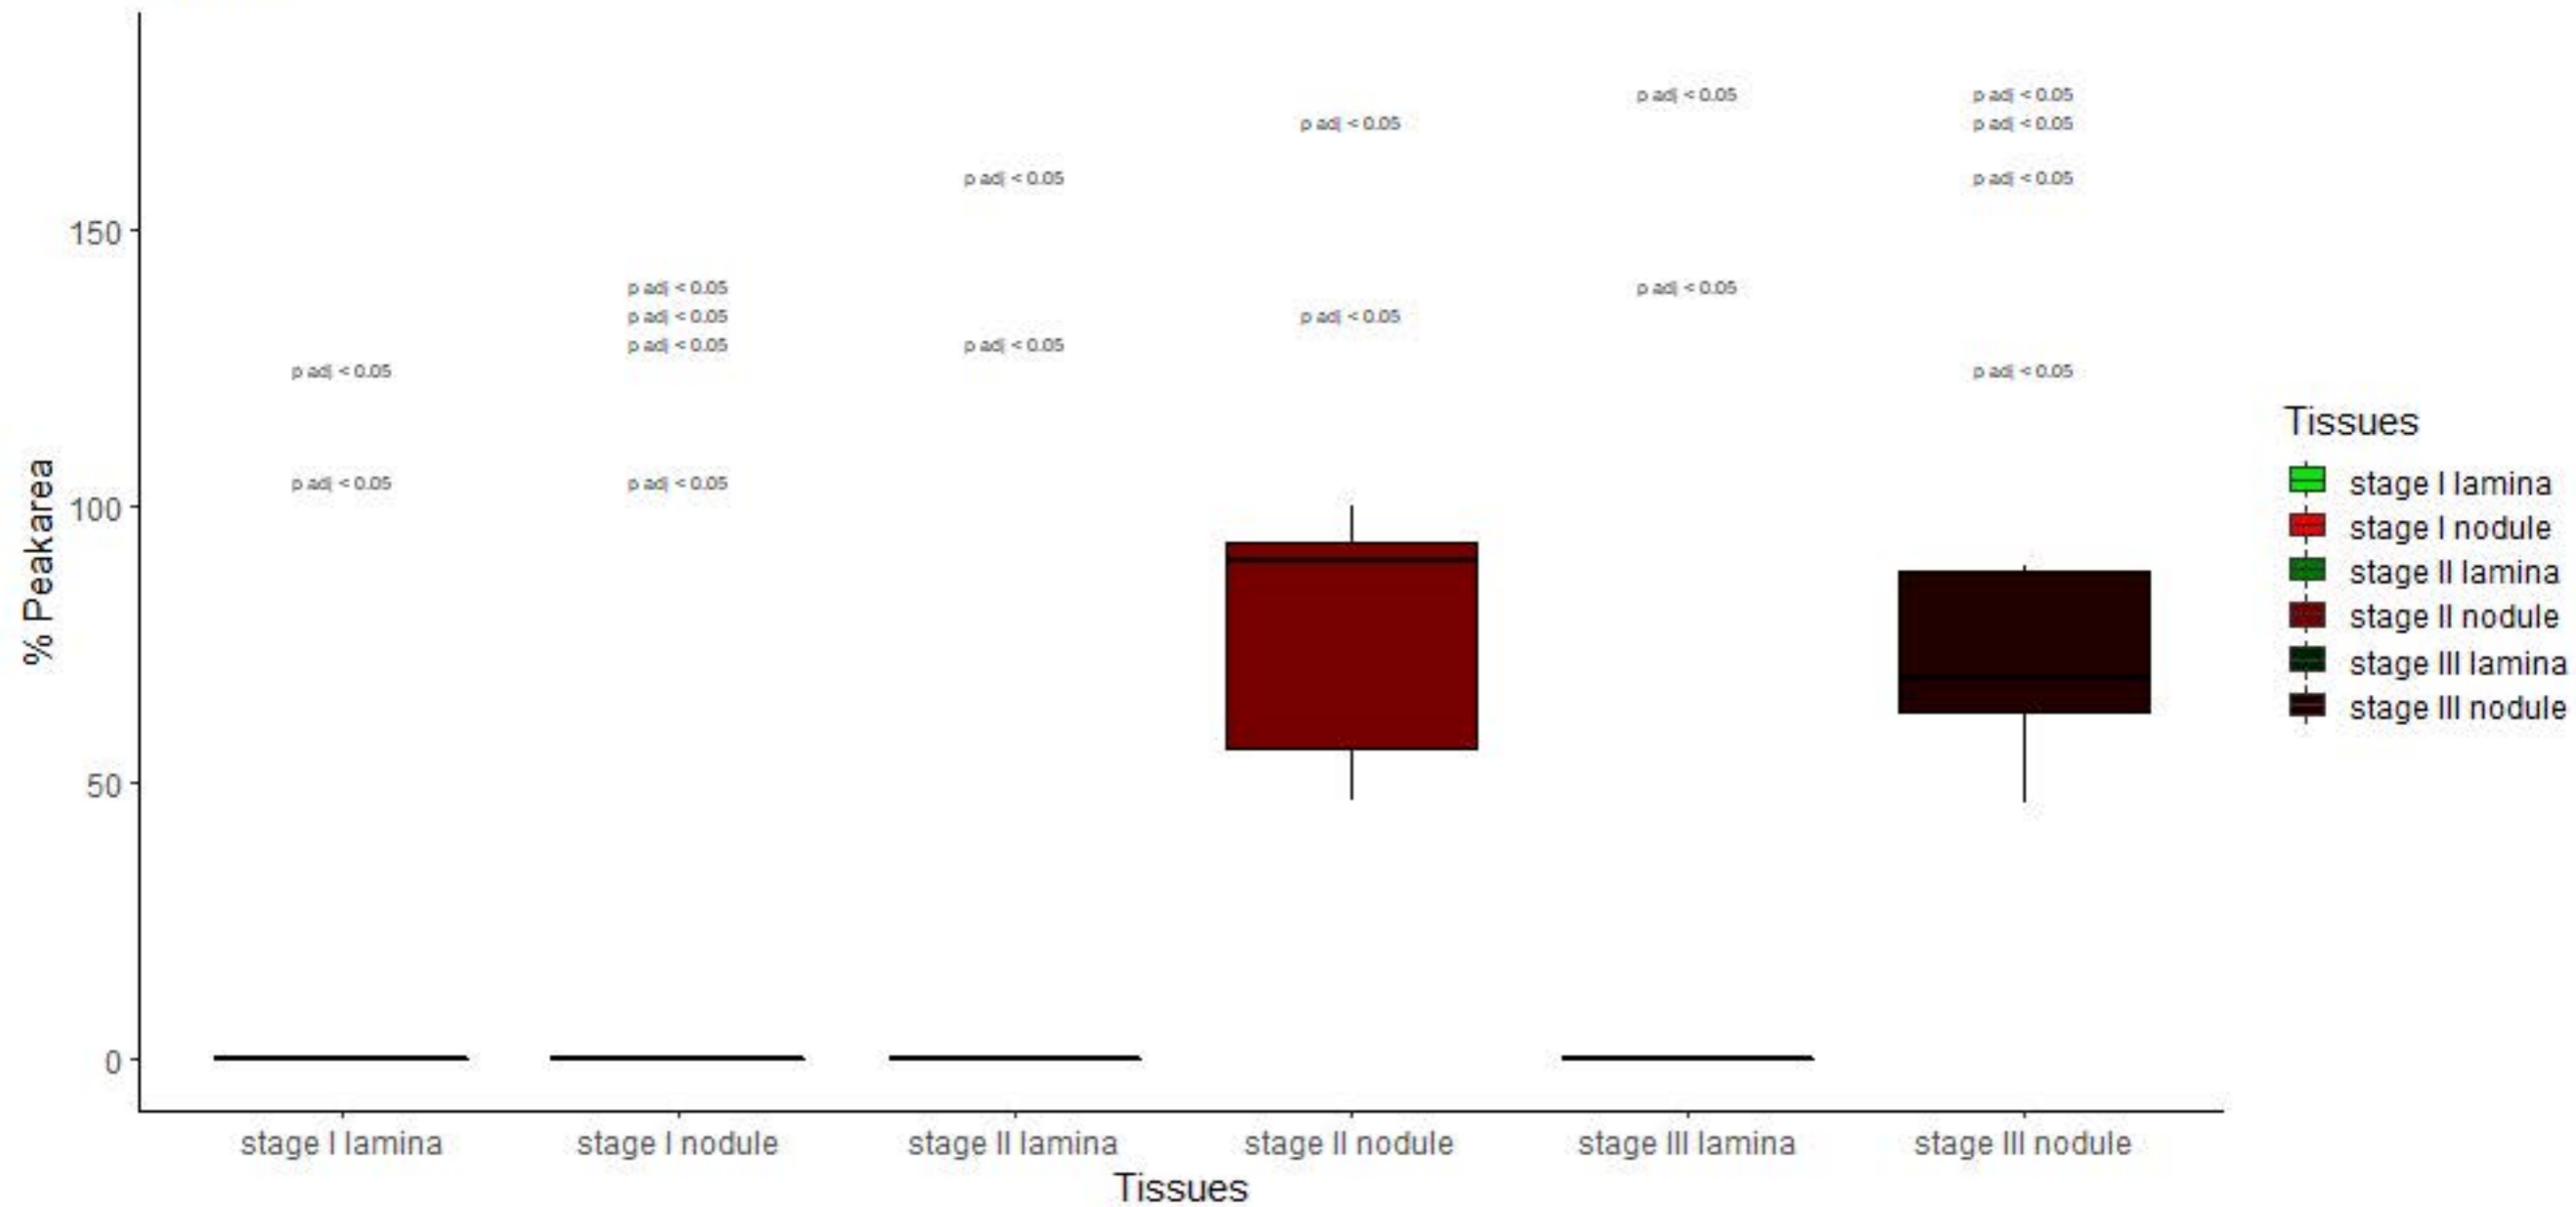

NA 87

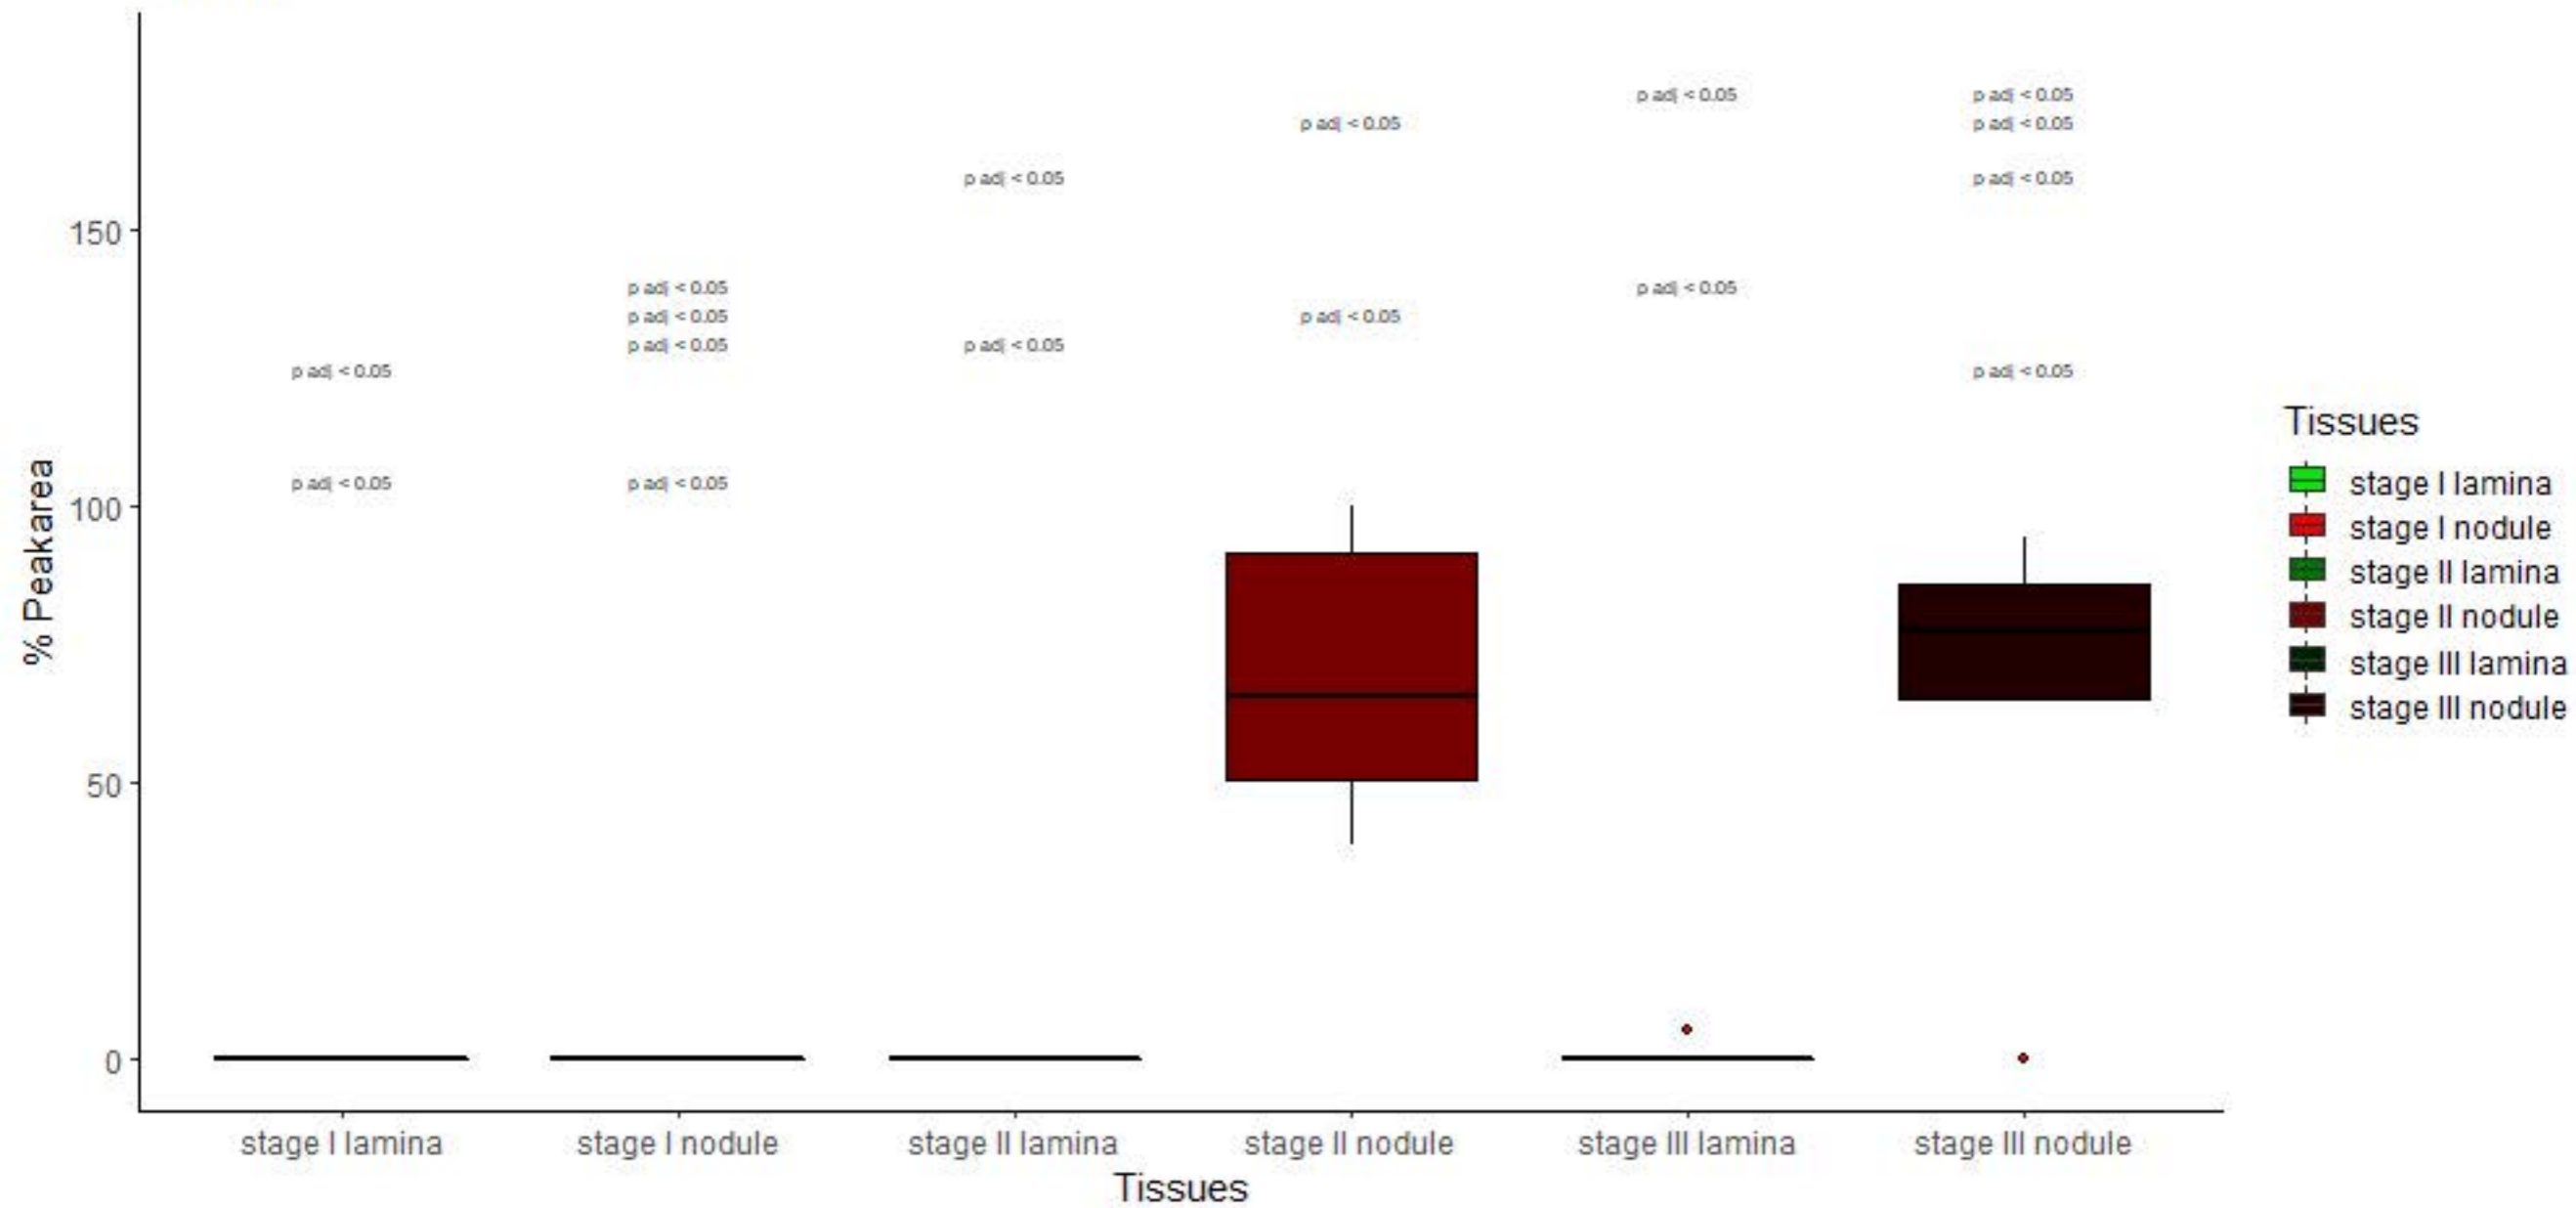

NA 88

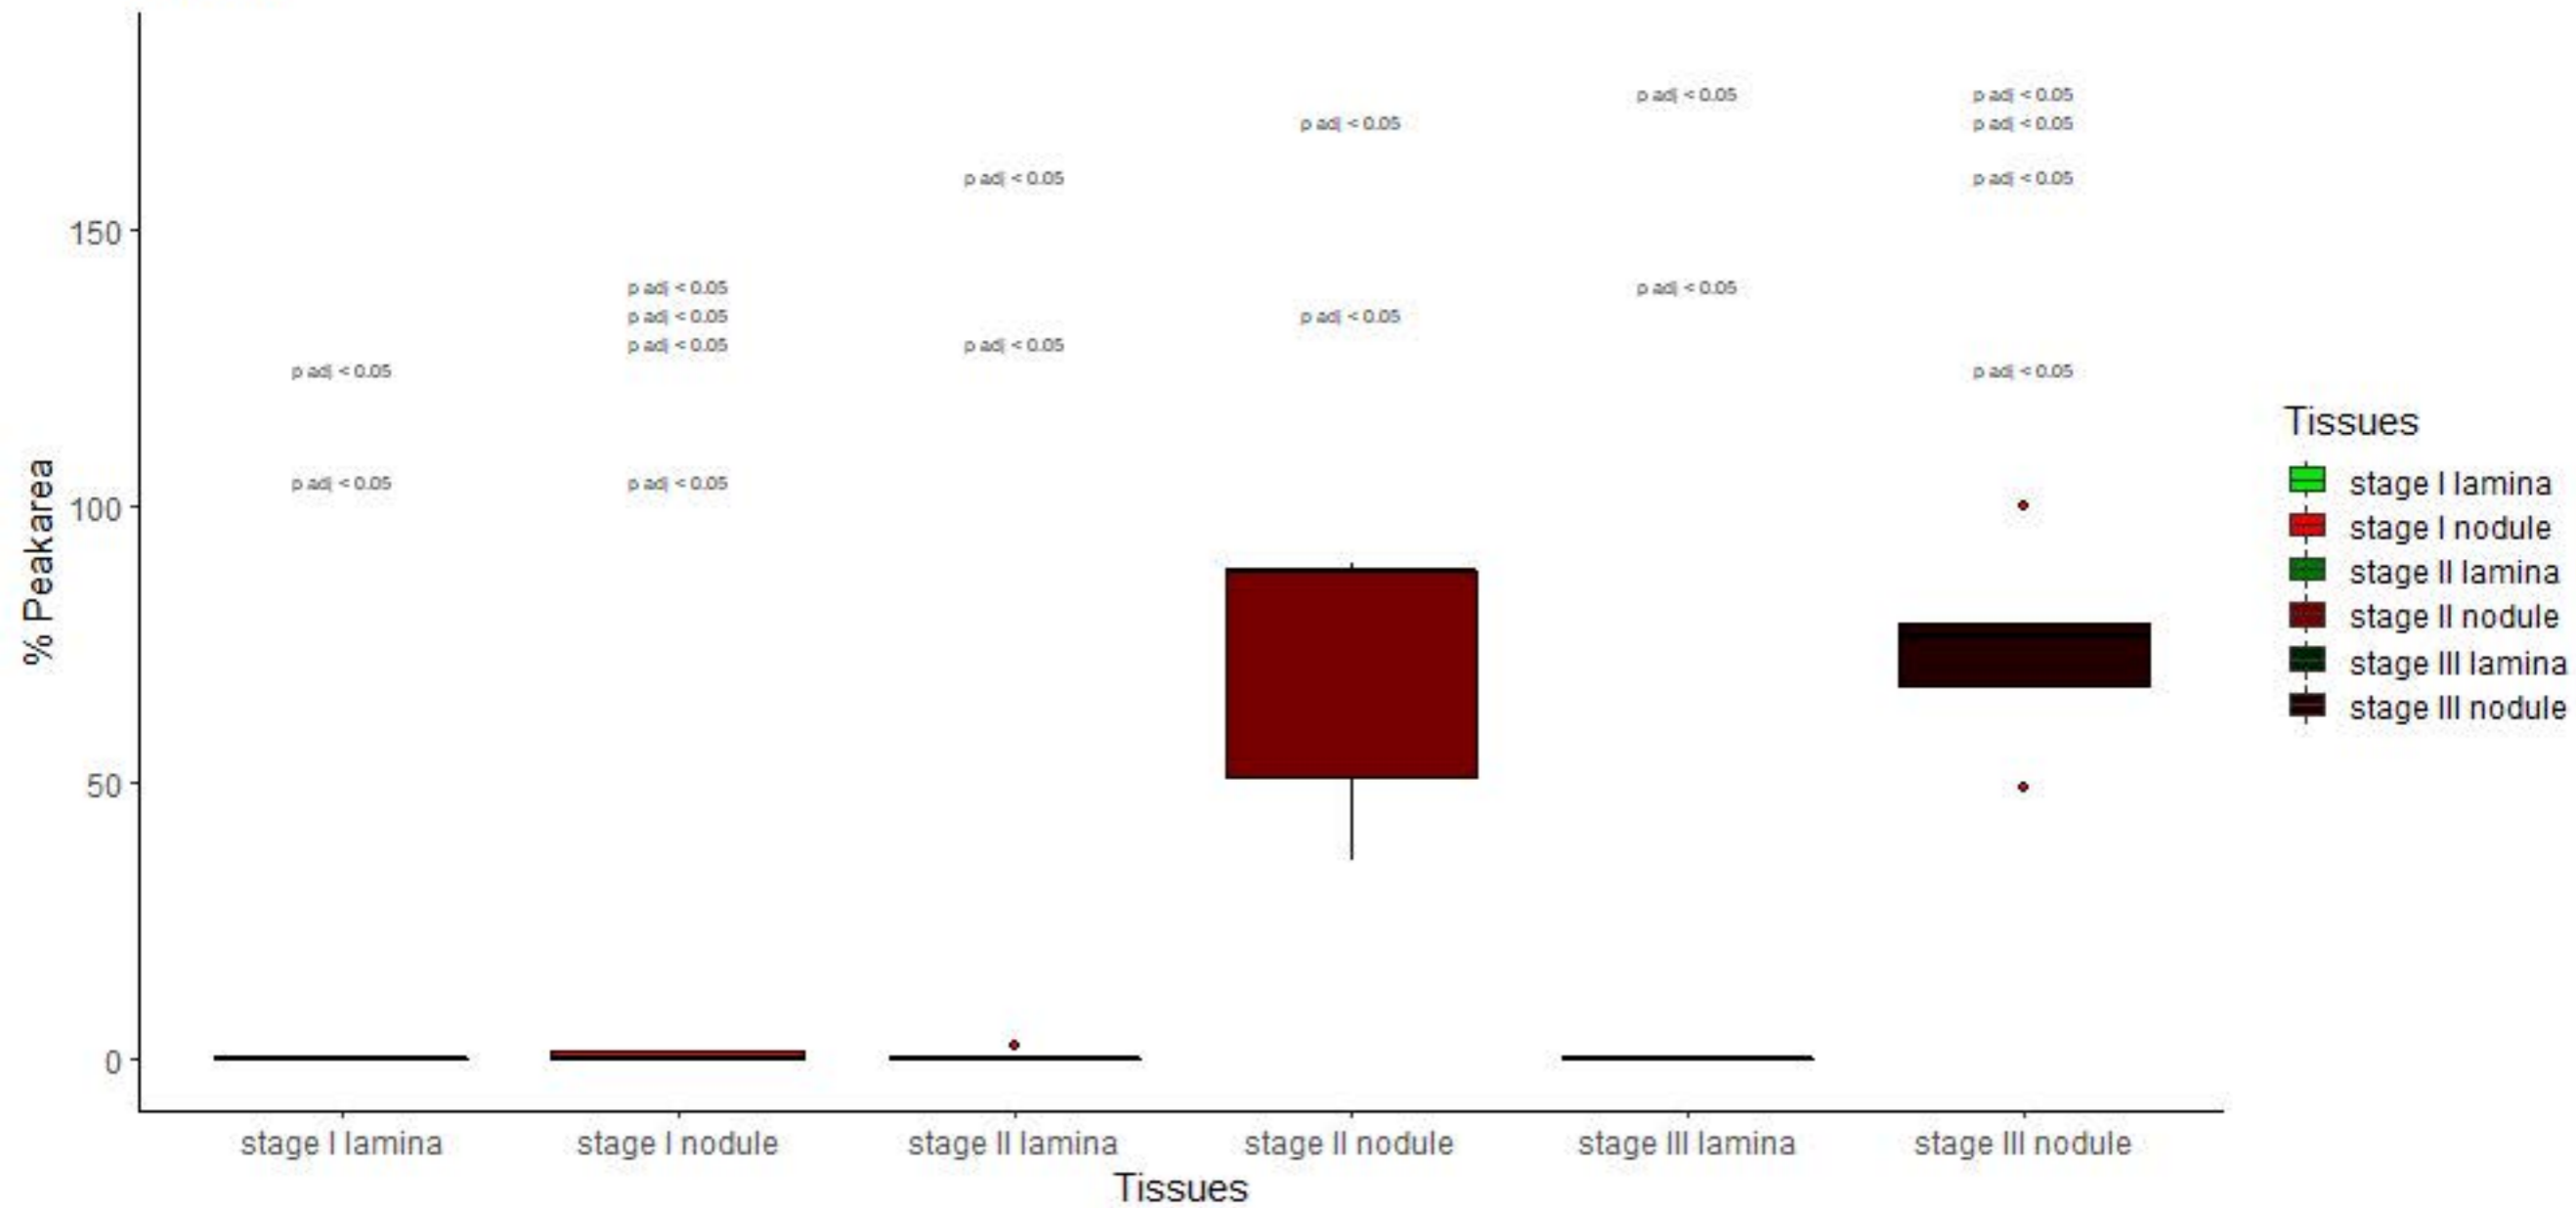

NA 89

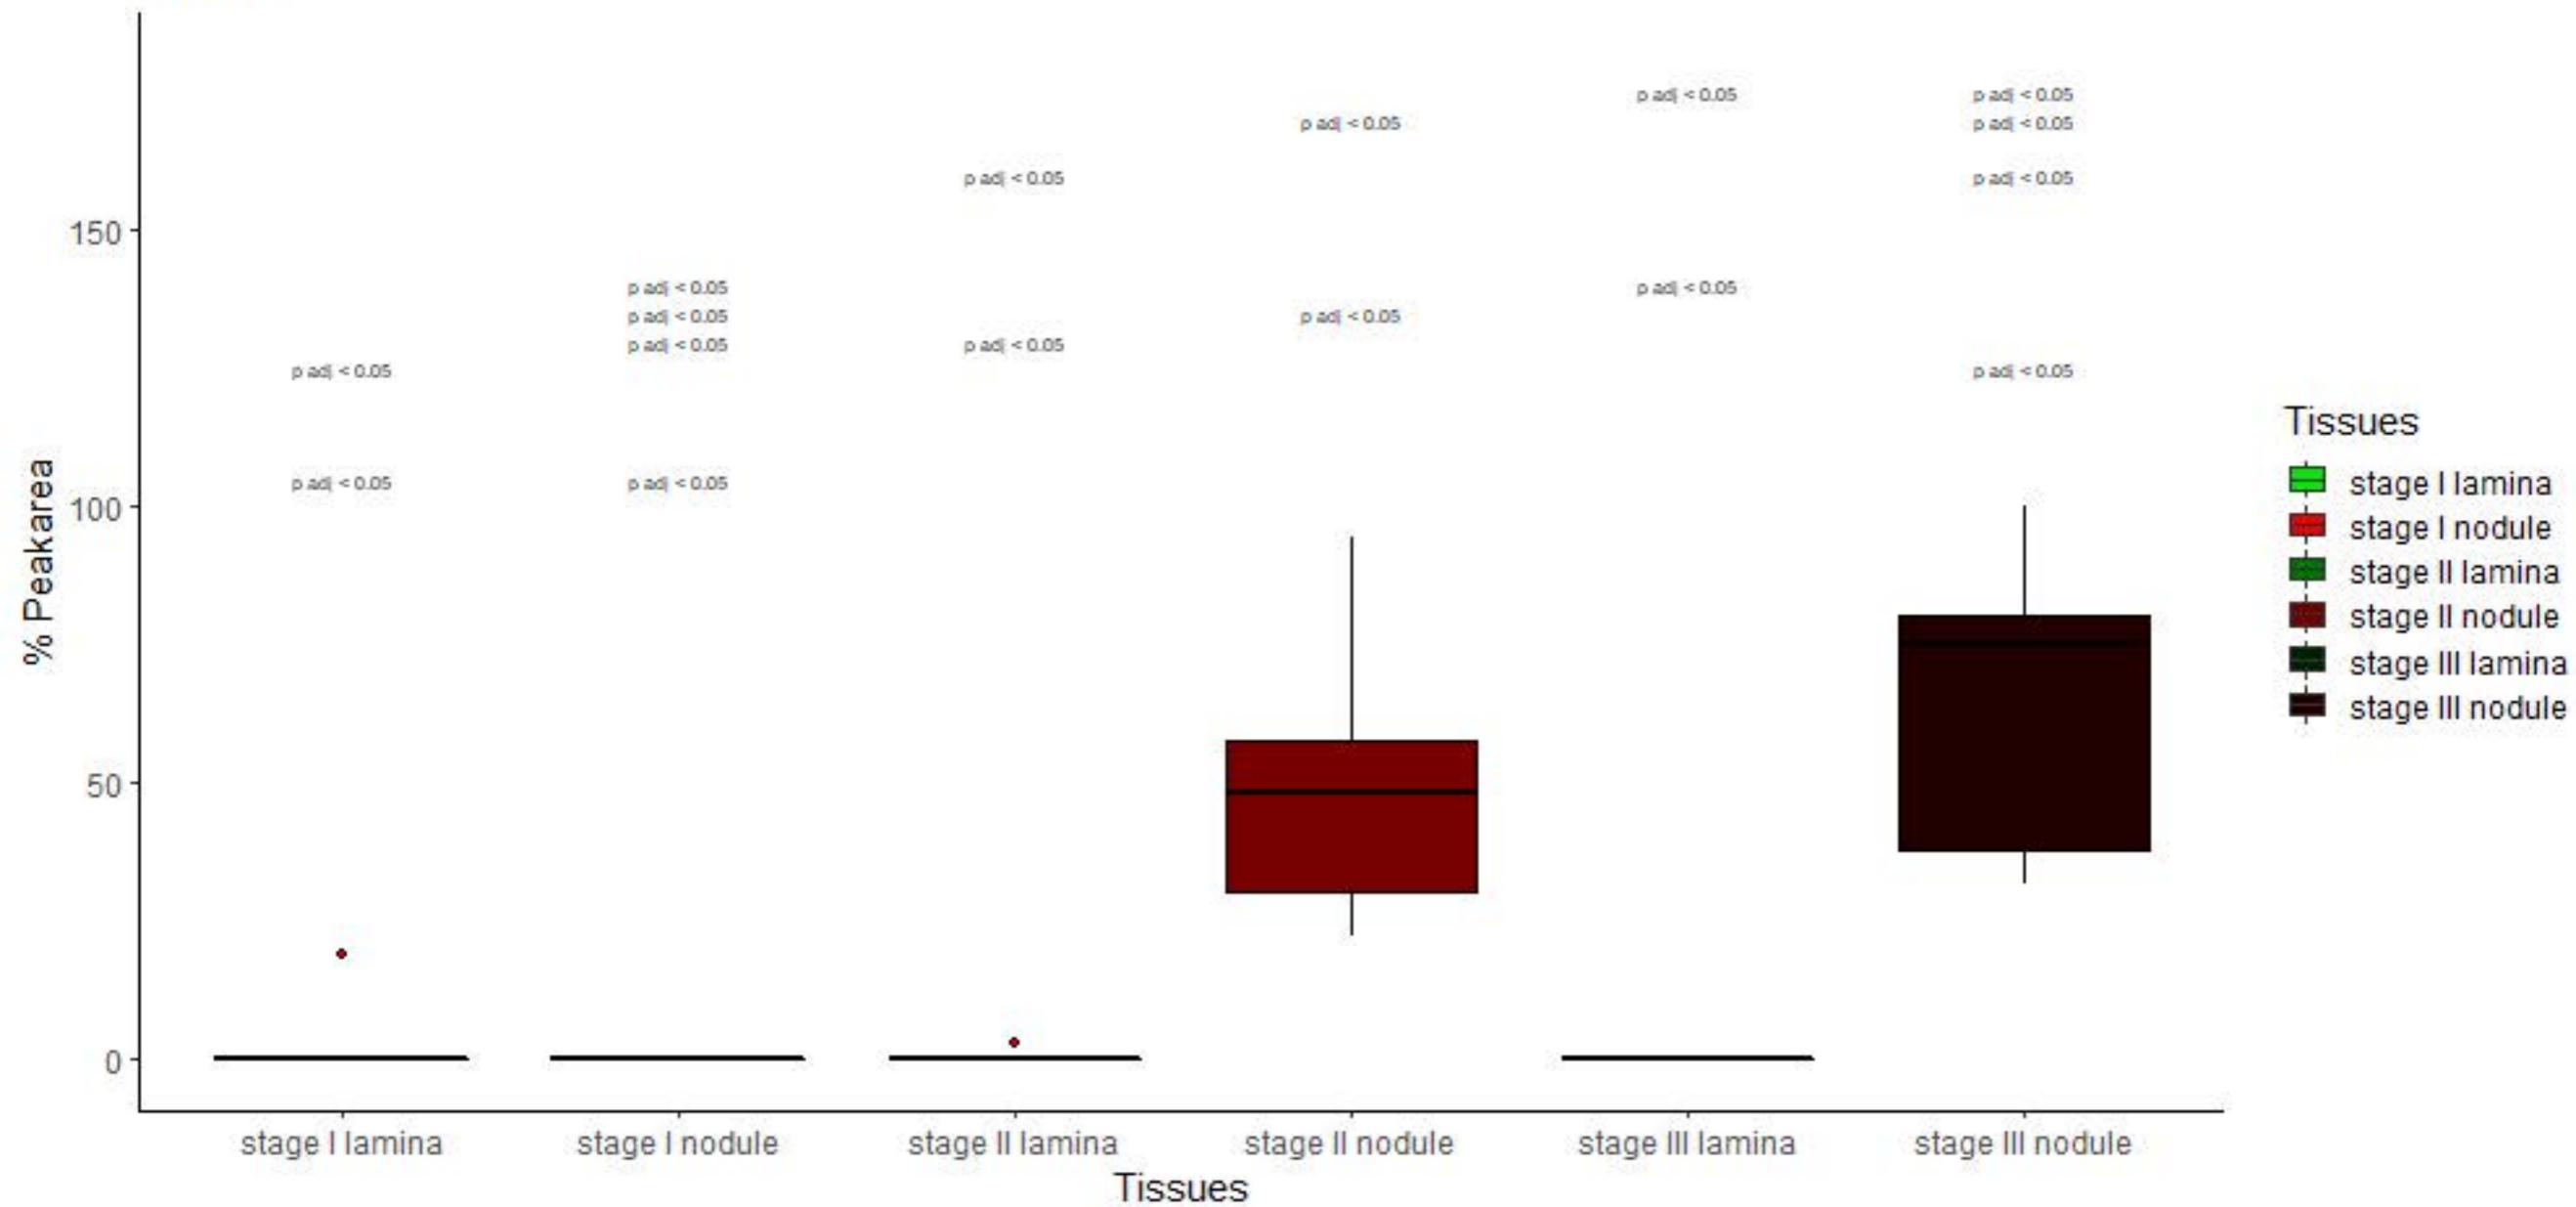

NA 94

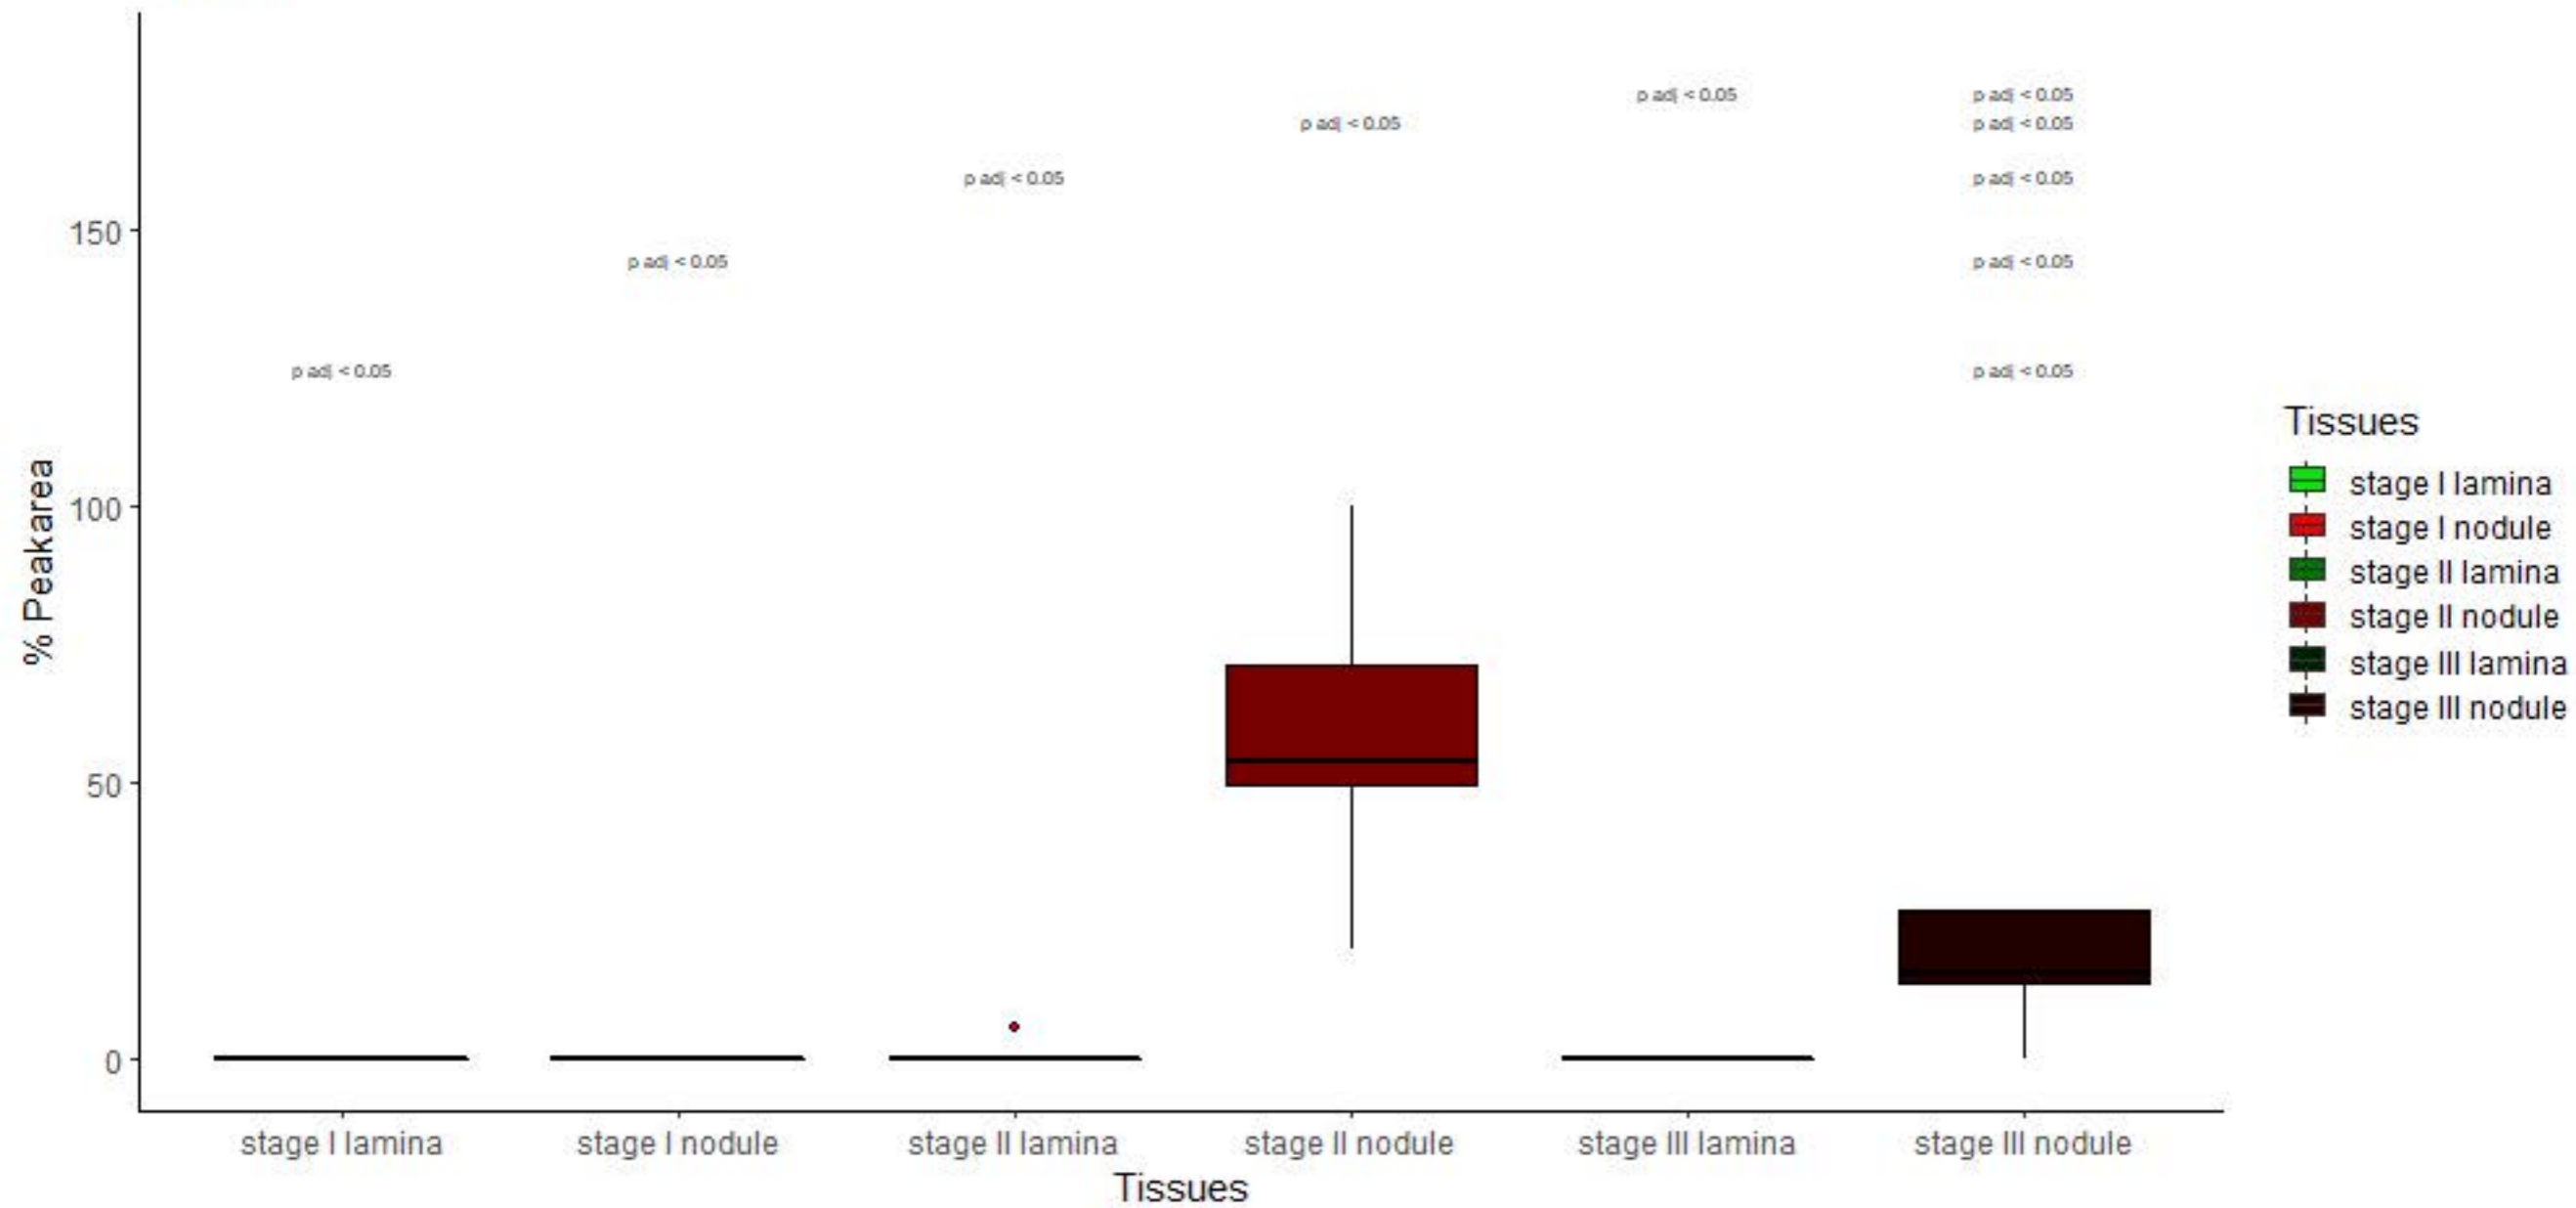

Supplement: DataSheet2.pdf [file DataSheet2.pdf]
