# Supplementary material for: Dissecting Metabolism of Leaf Nodules in Ardisia crenata and Psychotria punctata
Source: PubMed Central journal article supplement (PMC8362603; doi:10.3389/fmolb.2021.683671), 2021-07-30

# Quercetin\_rha\_hex\_pent\_RT:20.71\_min\_m/z:743.2029

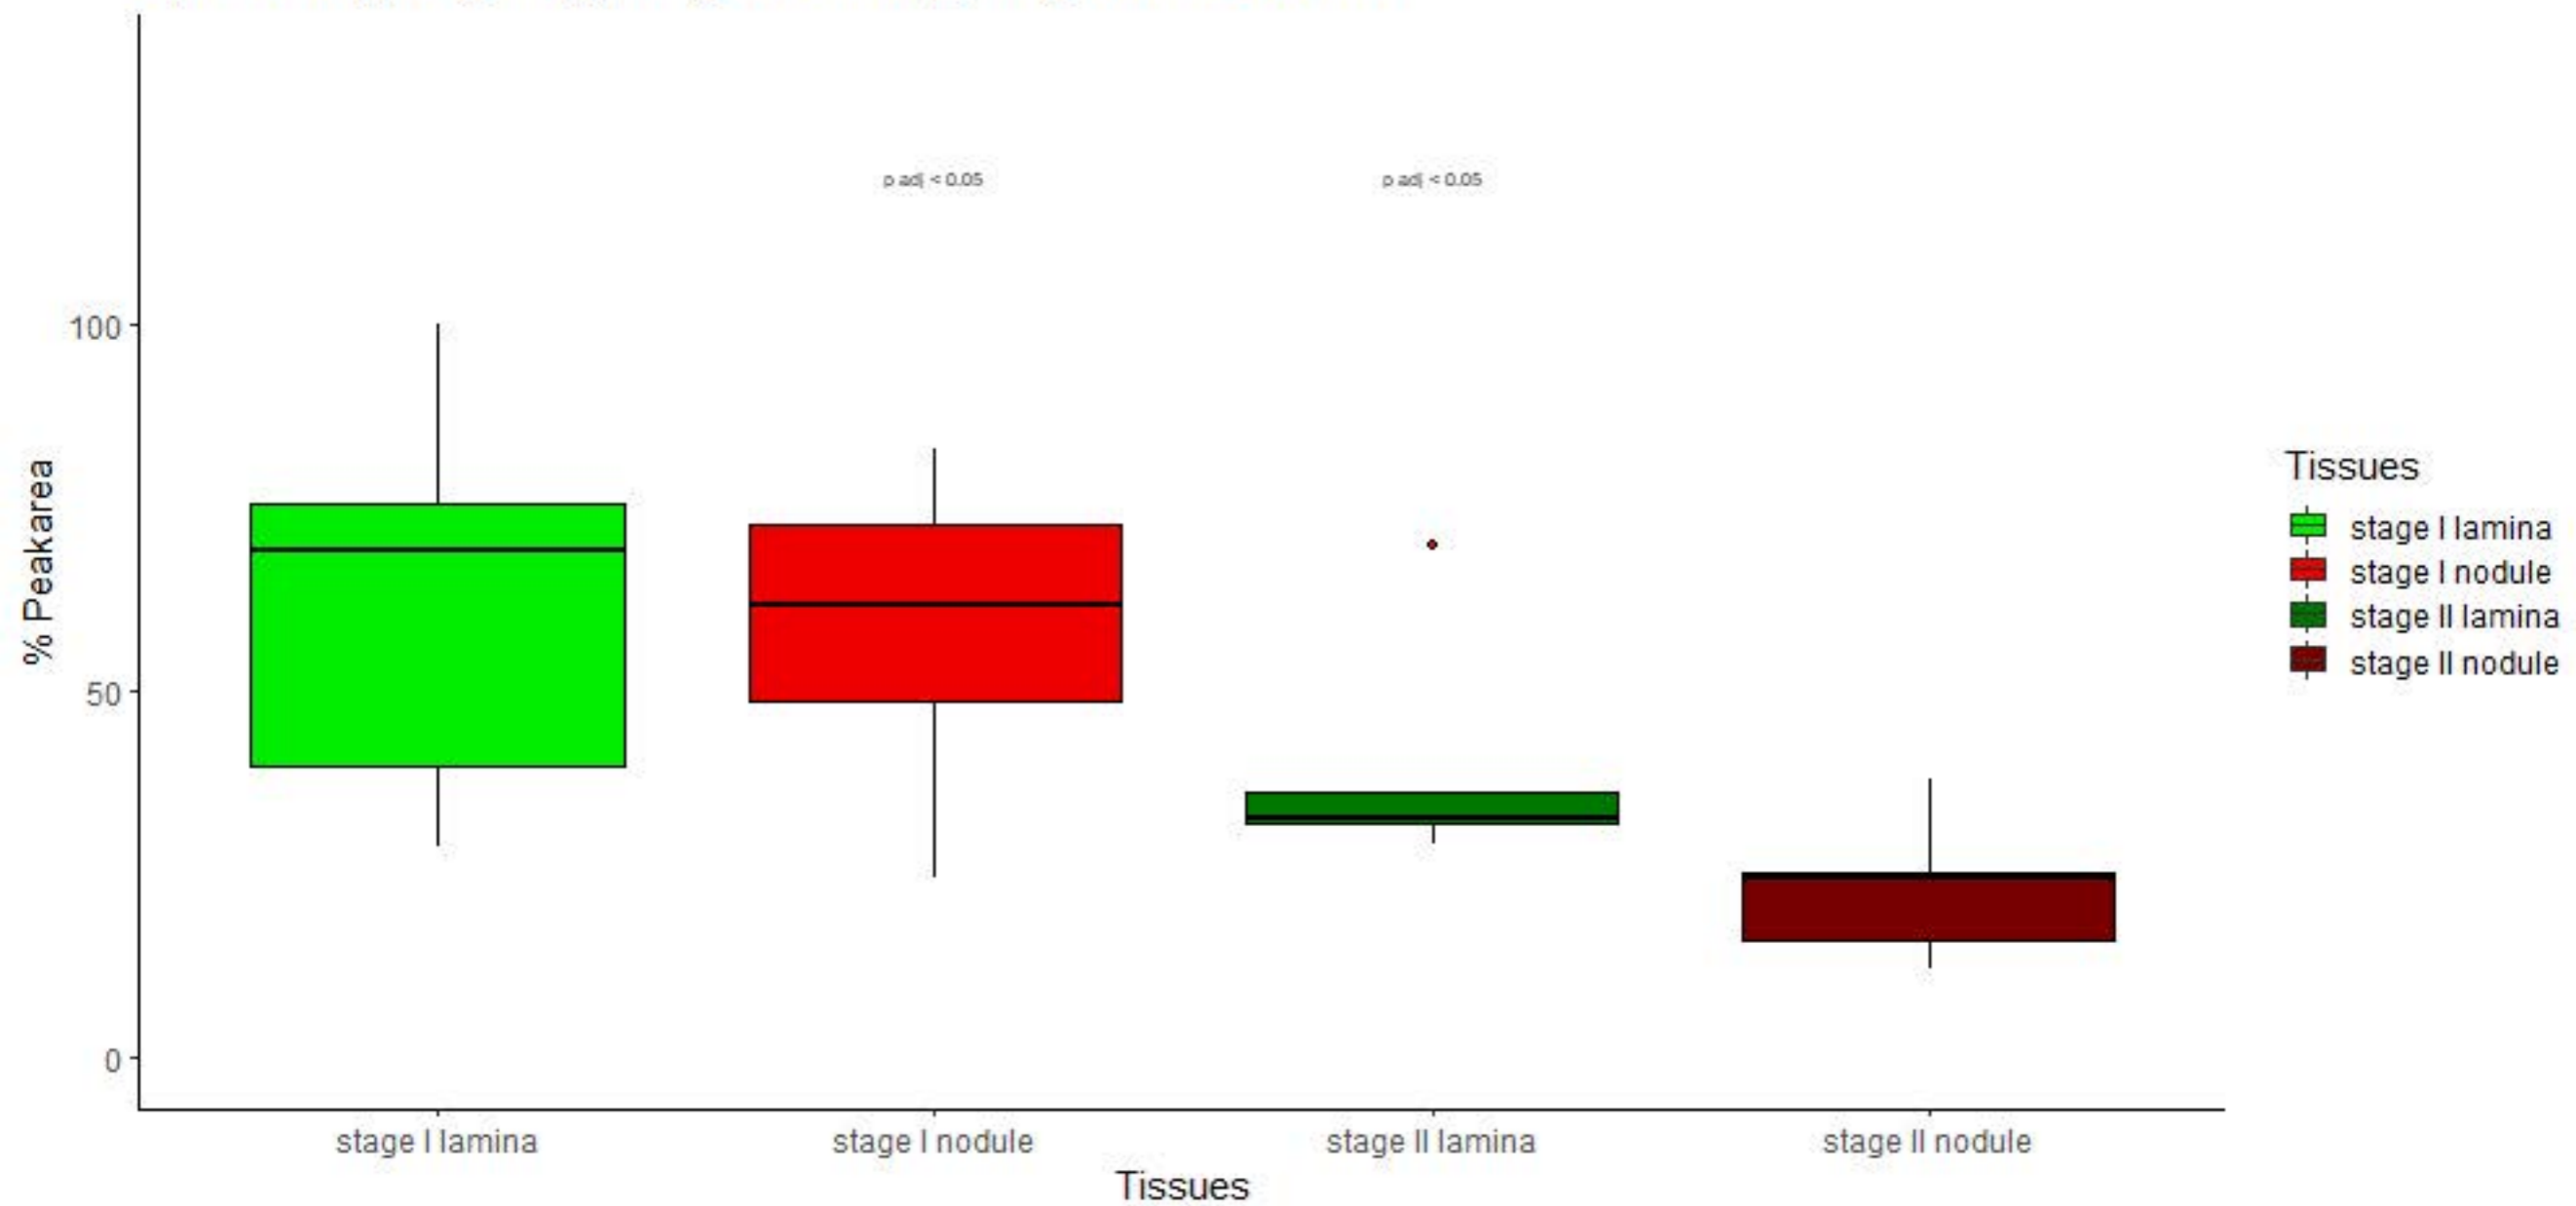

# Quercetin\_RT:20.72\_min\_m/z:303.0499

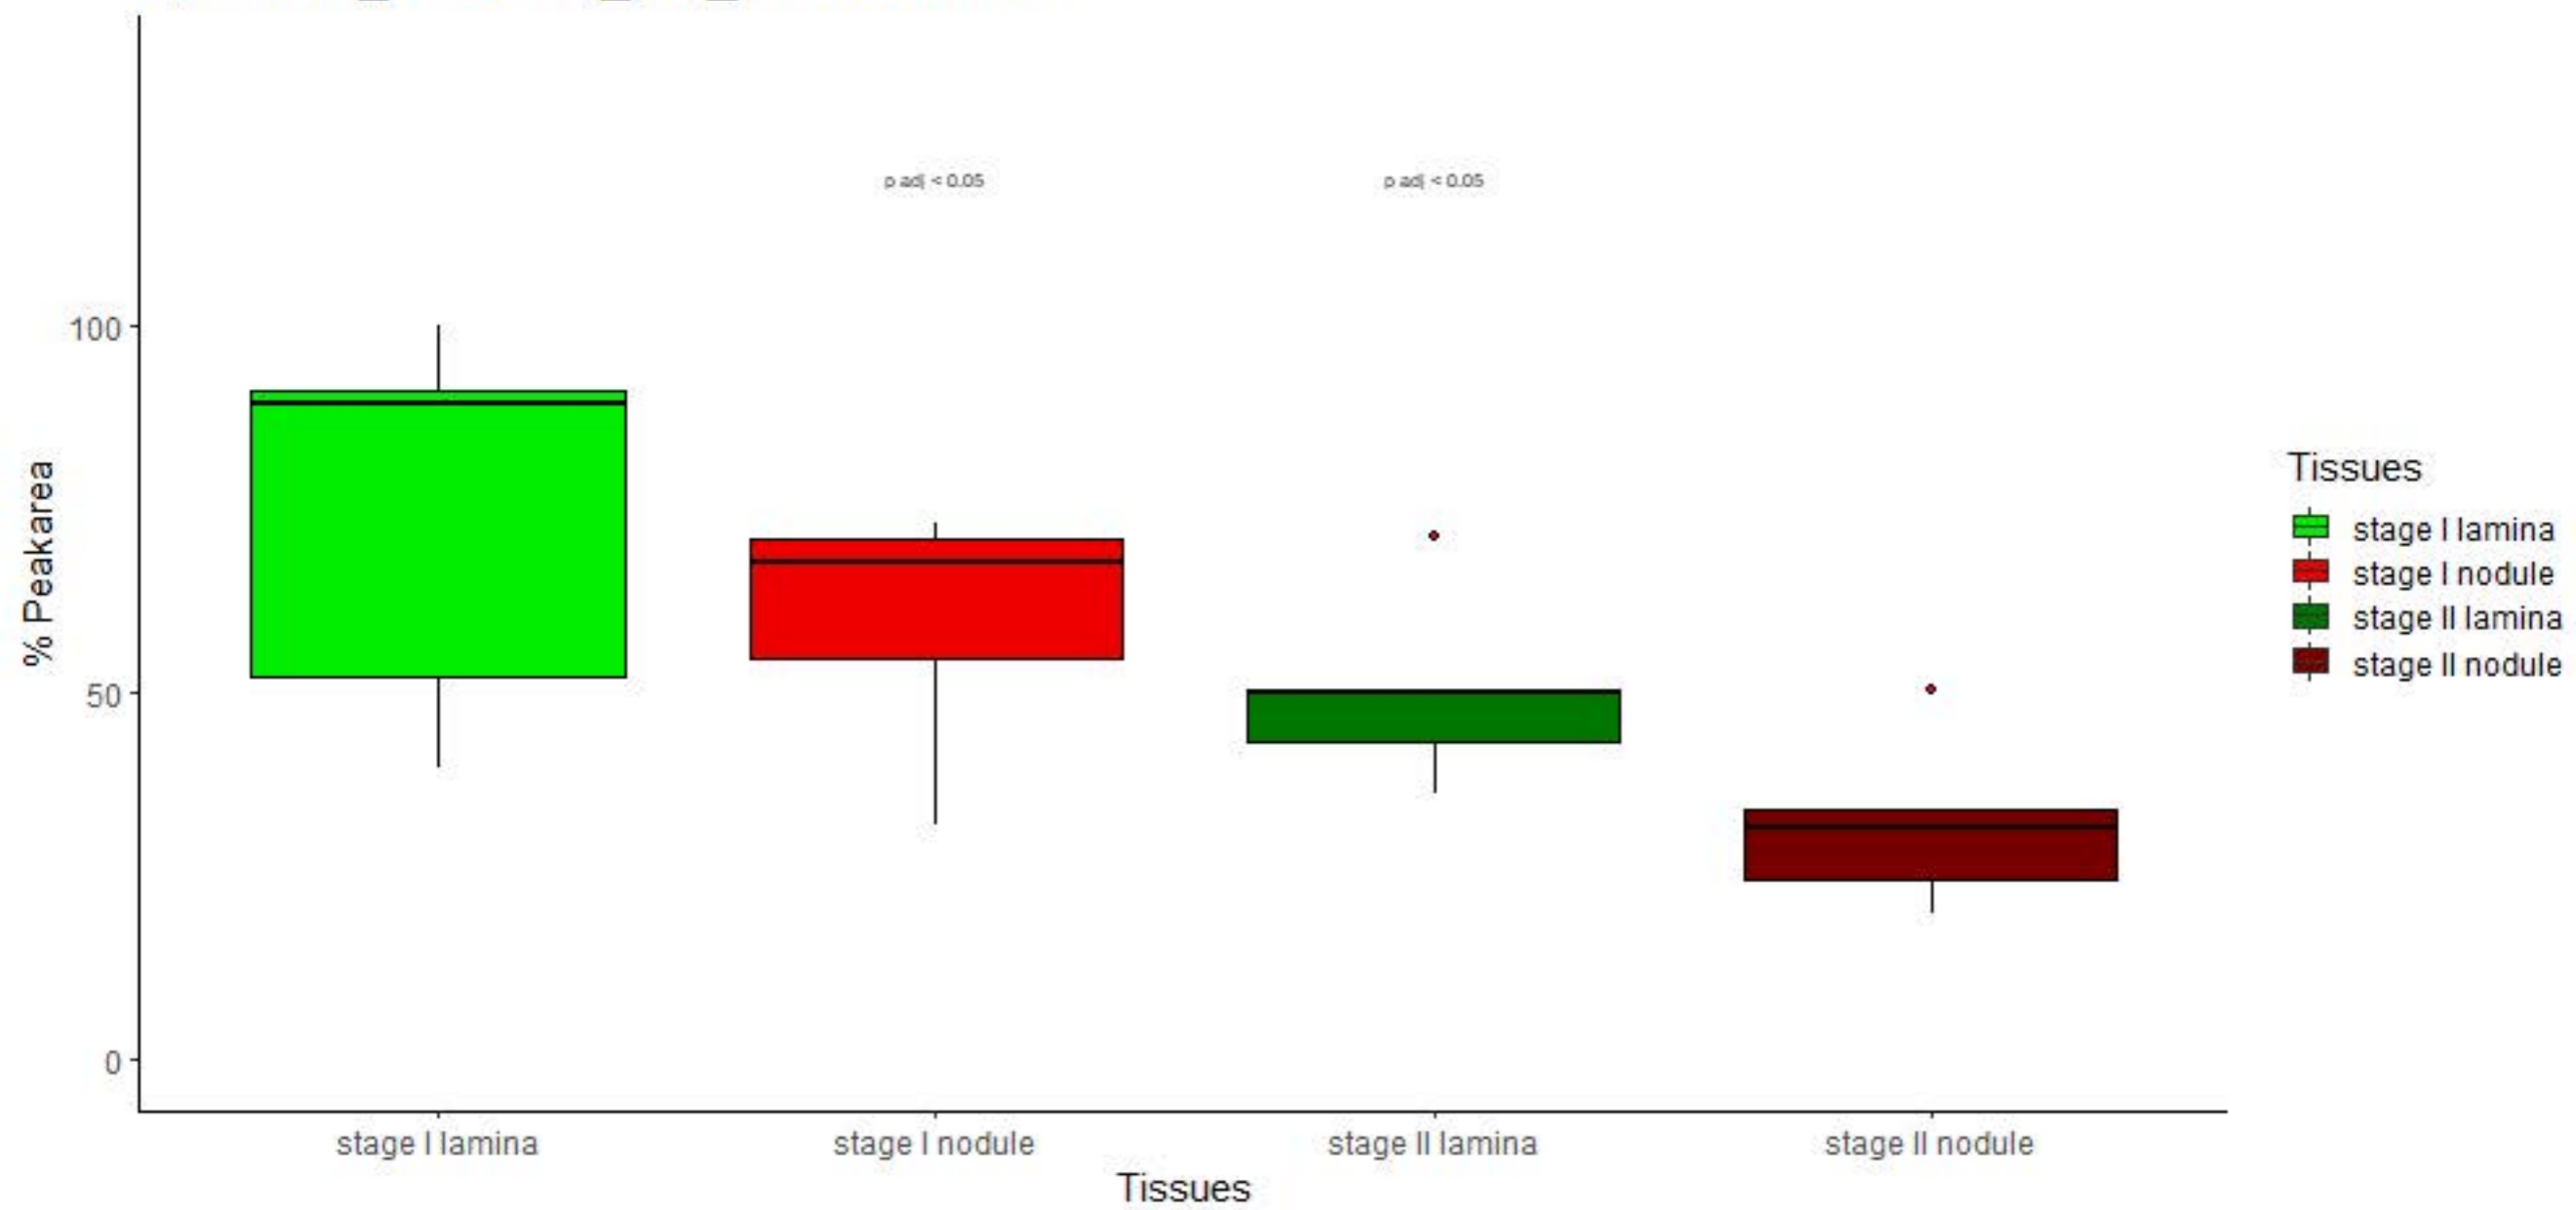

# Caffeoylquinic\_acid\_RT:17.96\_min\_m/z:355.1024

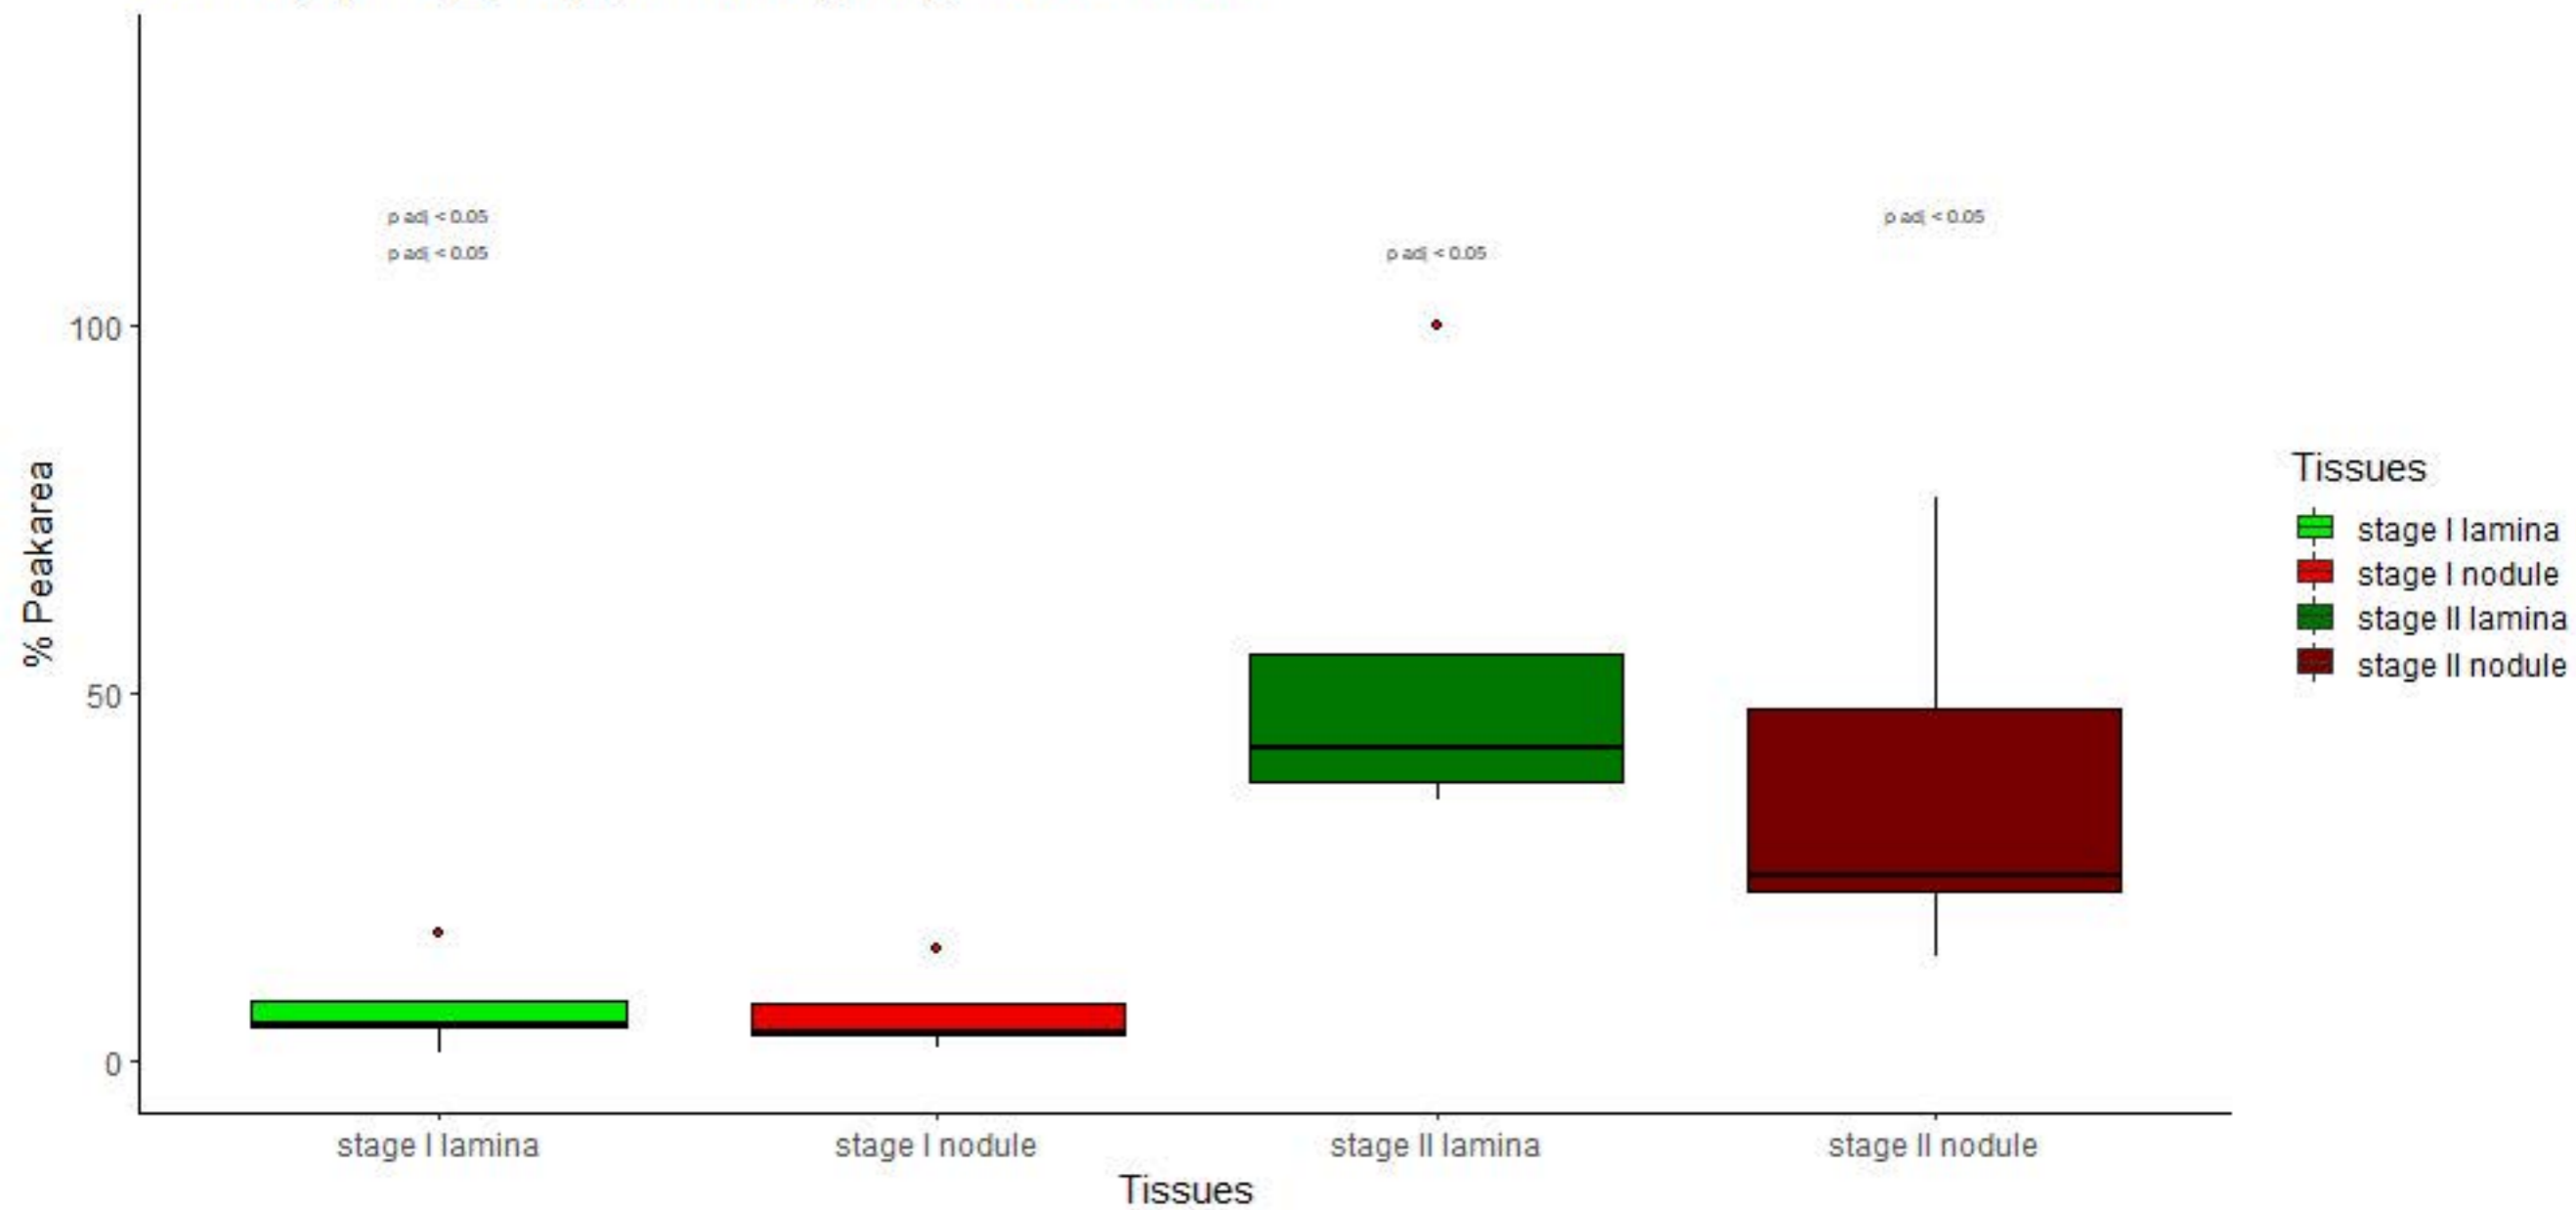

# Caffeoylquinic\_acid\_RT:18.33\_min\_m/z:355.1024

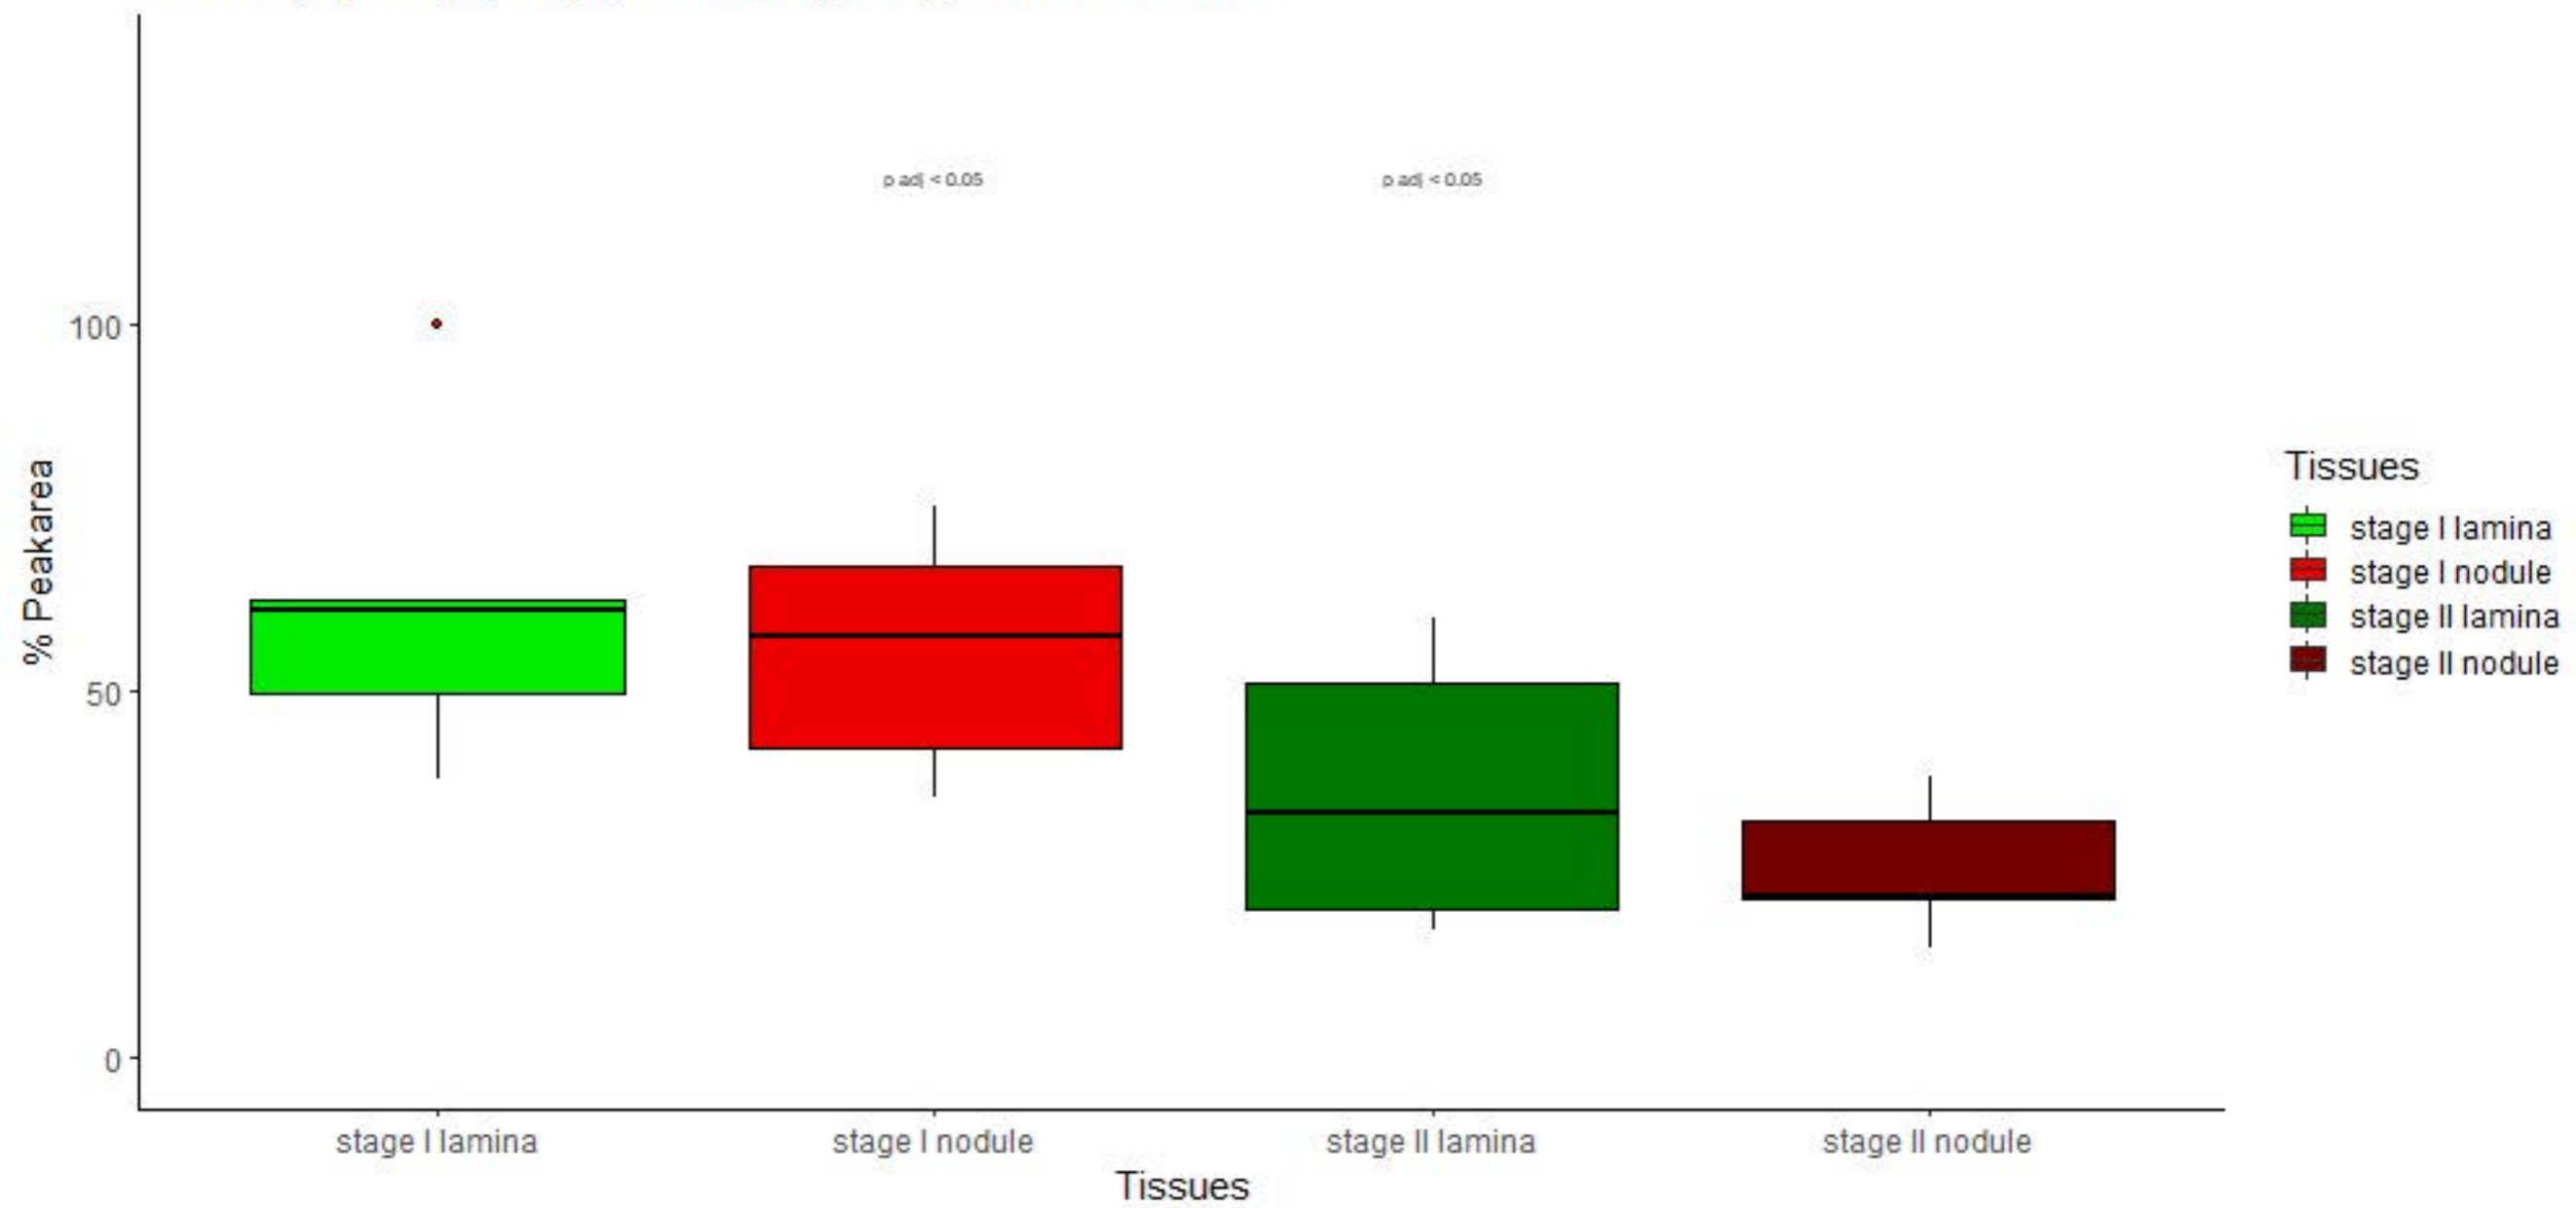

# Dehydroascorbic\_acid\_hydrate\_RT:4.05\_min\_m/z:193.0343

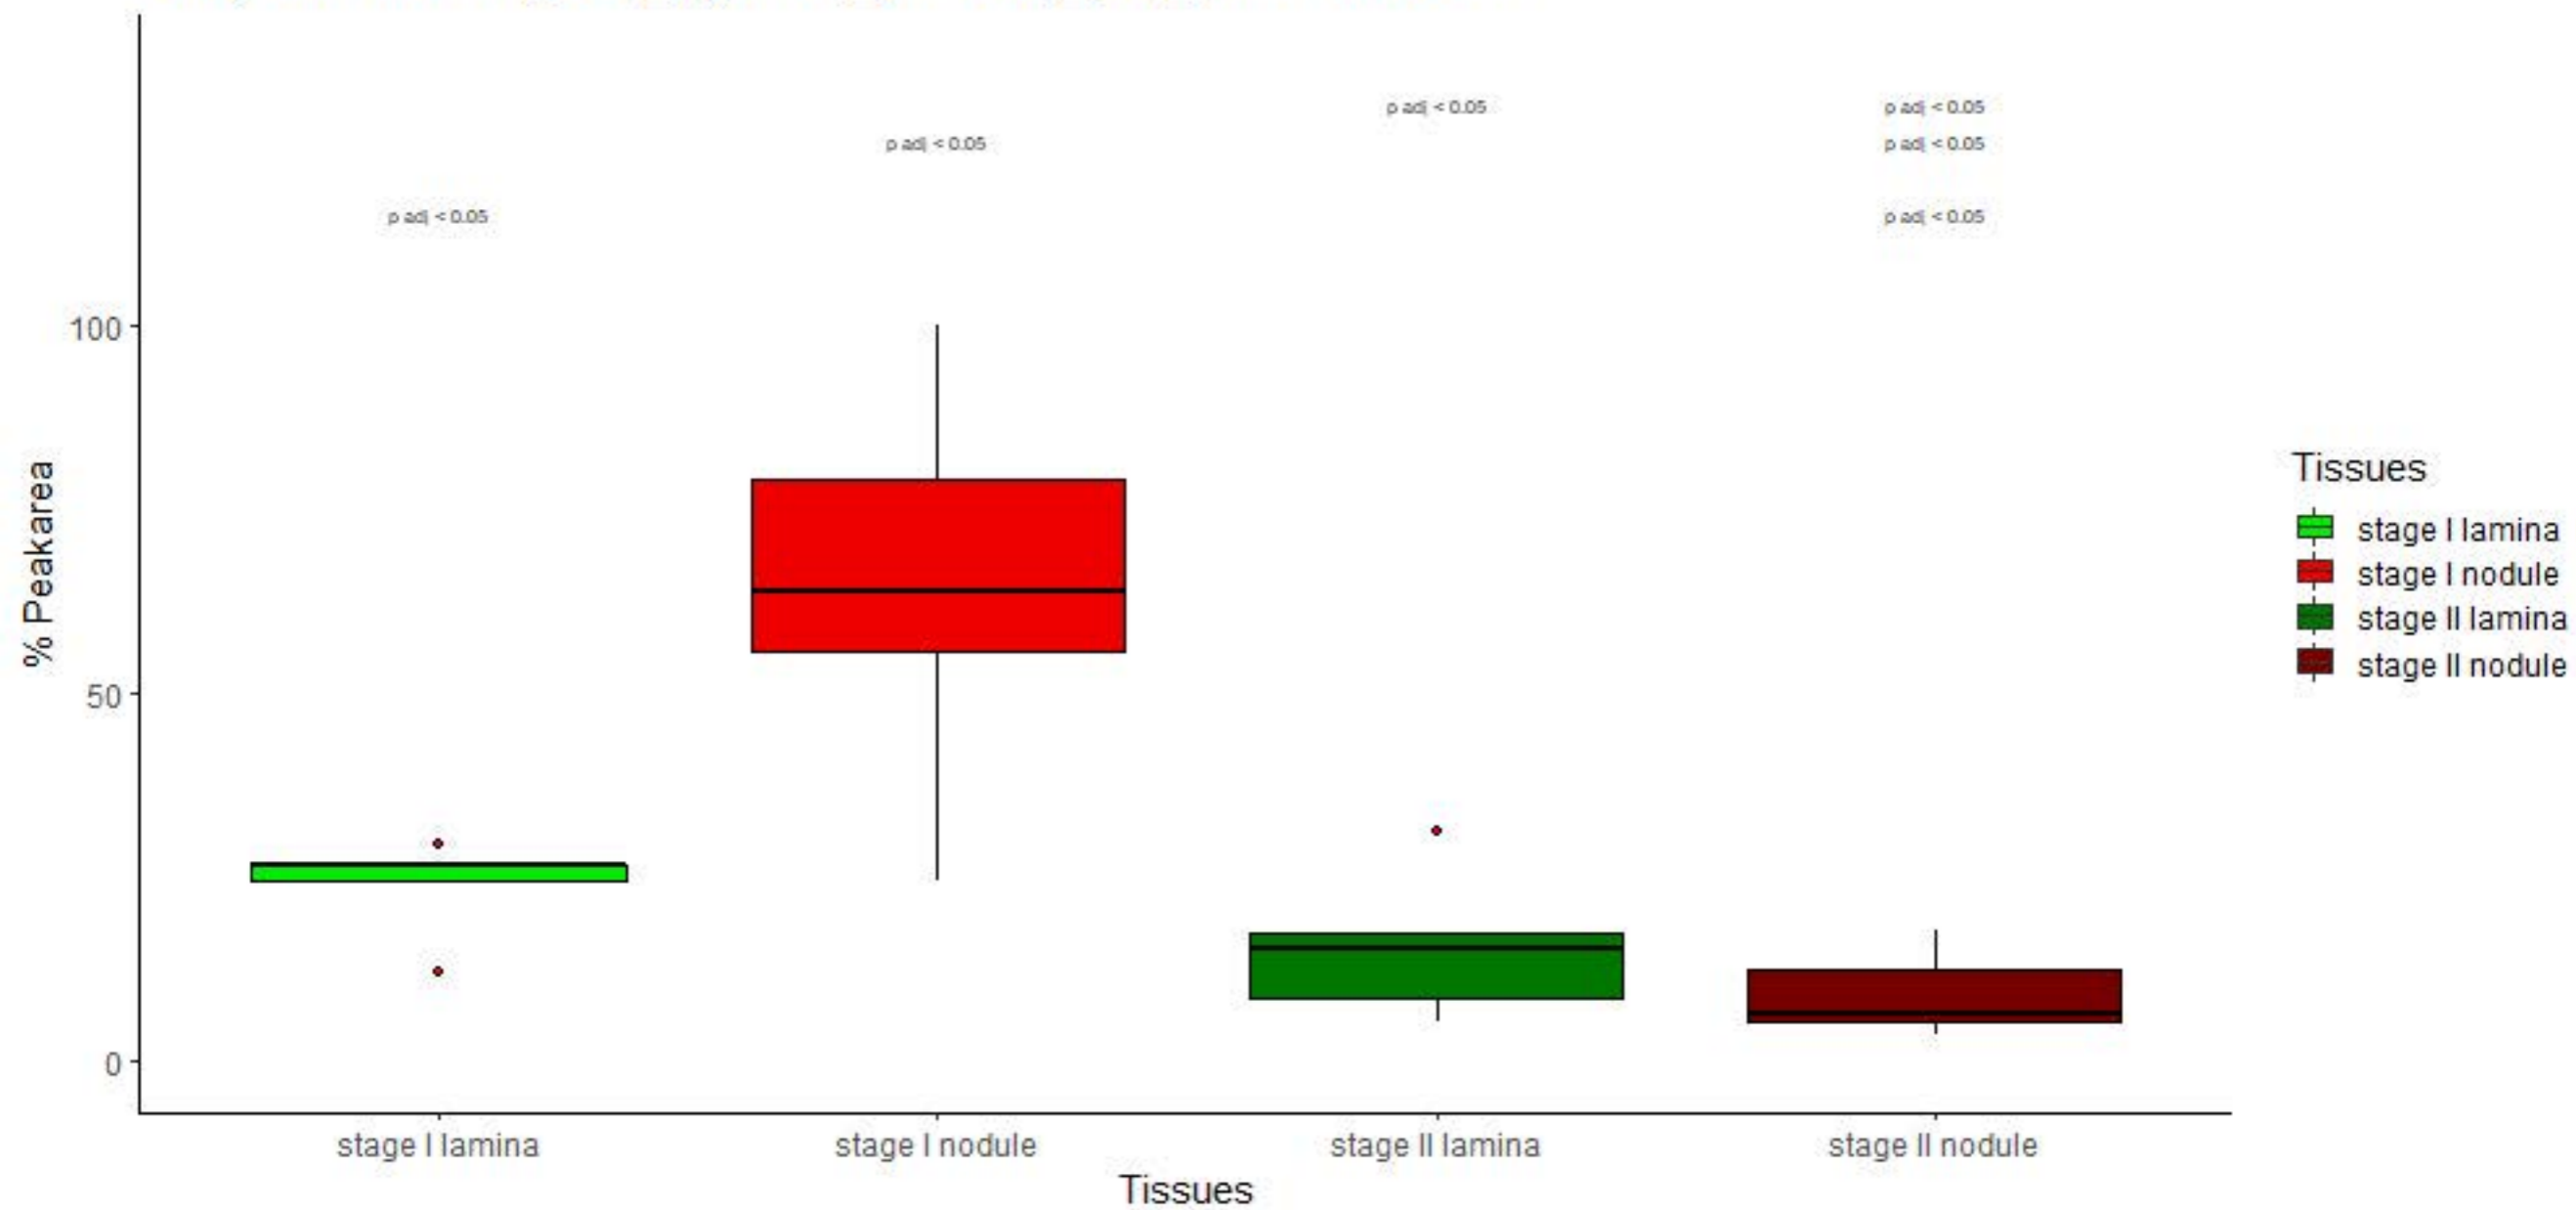

# Dehydroascorbic\_acid\_RT:4.05\_min\_m/z:175.0237

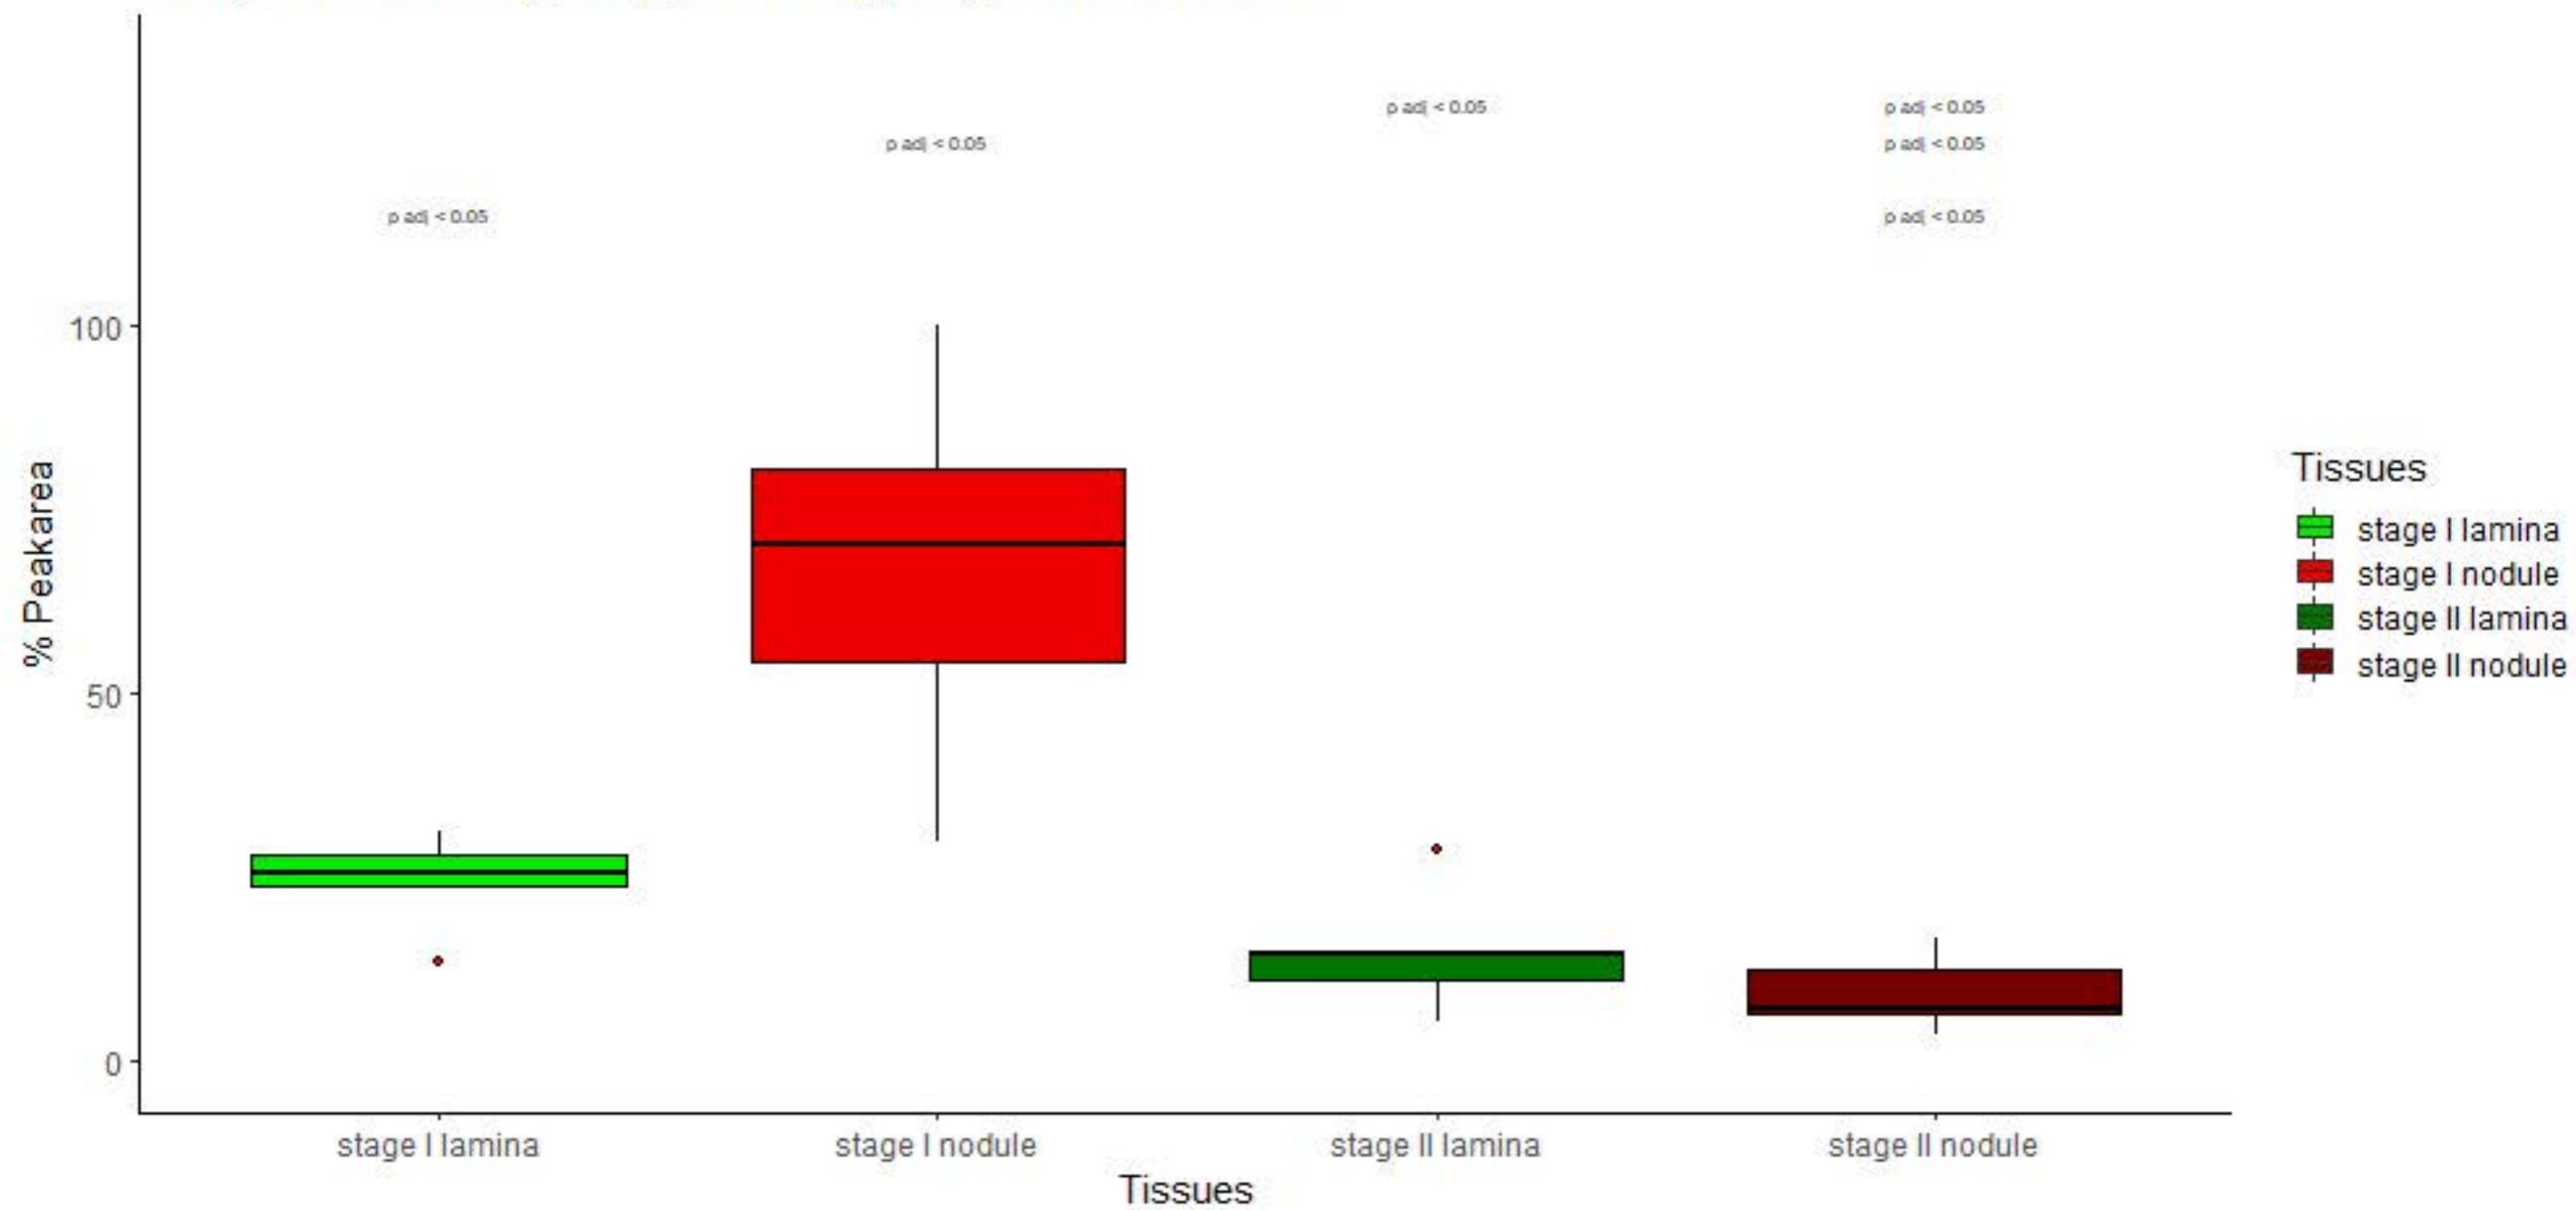

GSSG\_RT:6.09\_min\_m/z:613.1592

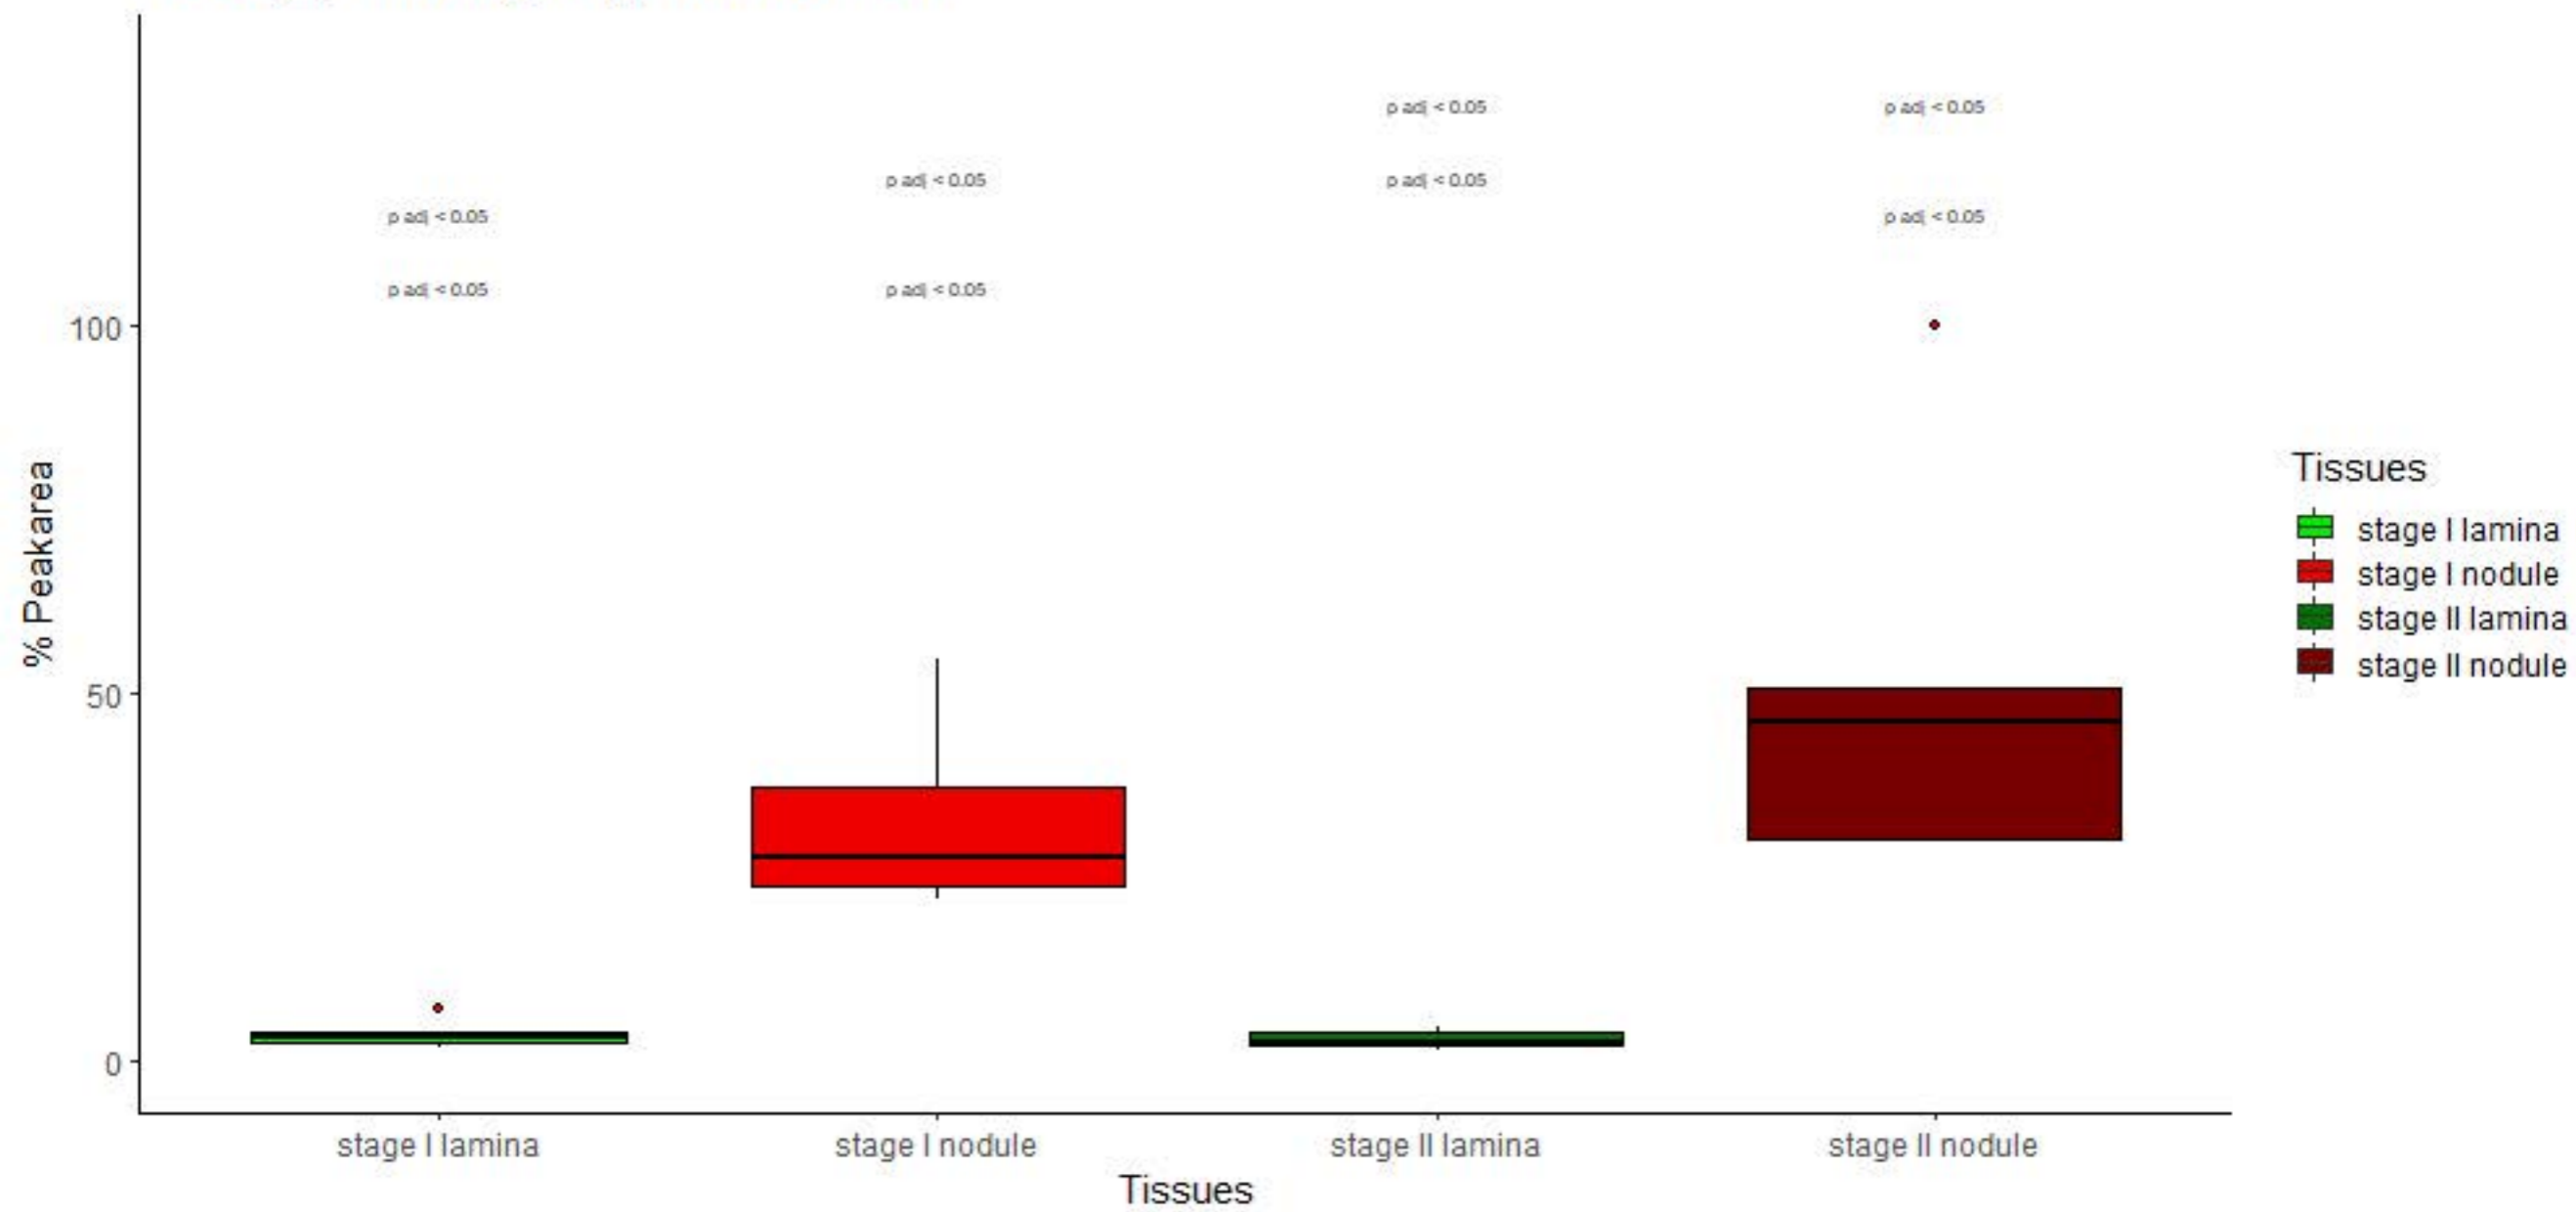

# Ophthalmic\_acid\_RT:4.05\_min\_m/z:290.1347

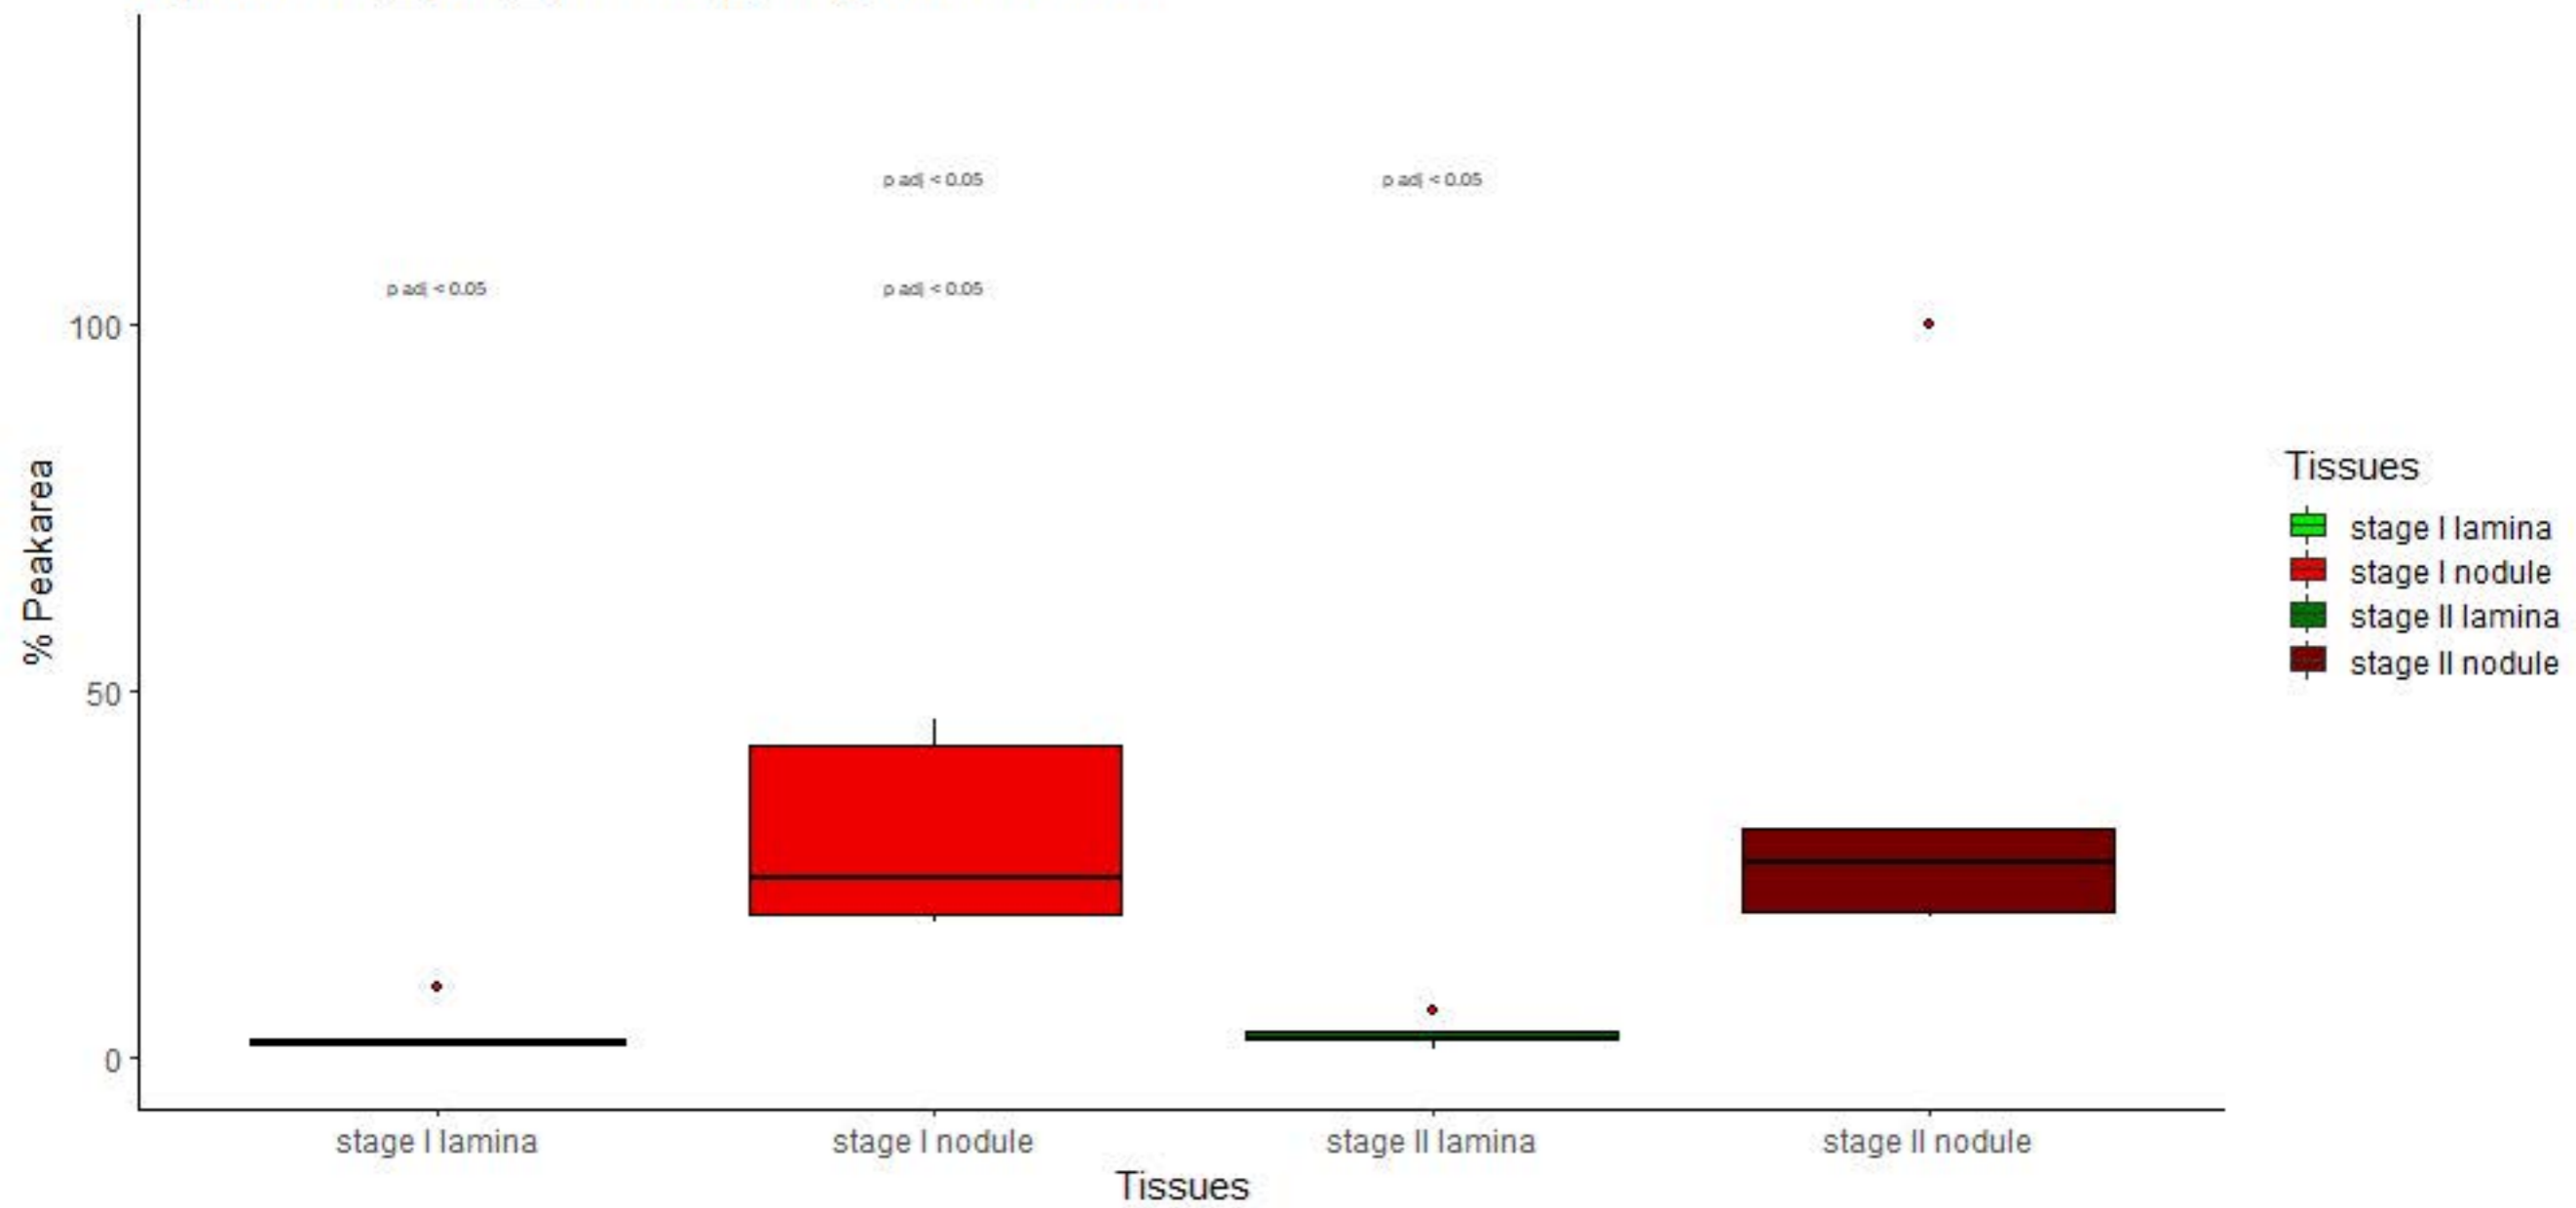



# Glutamic\_acid\_RT:2.38\_min\_m/z:148.0604

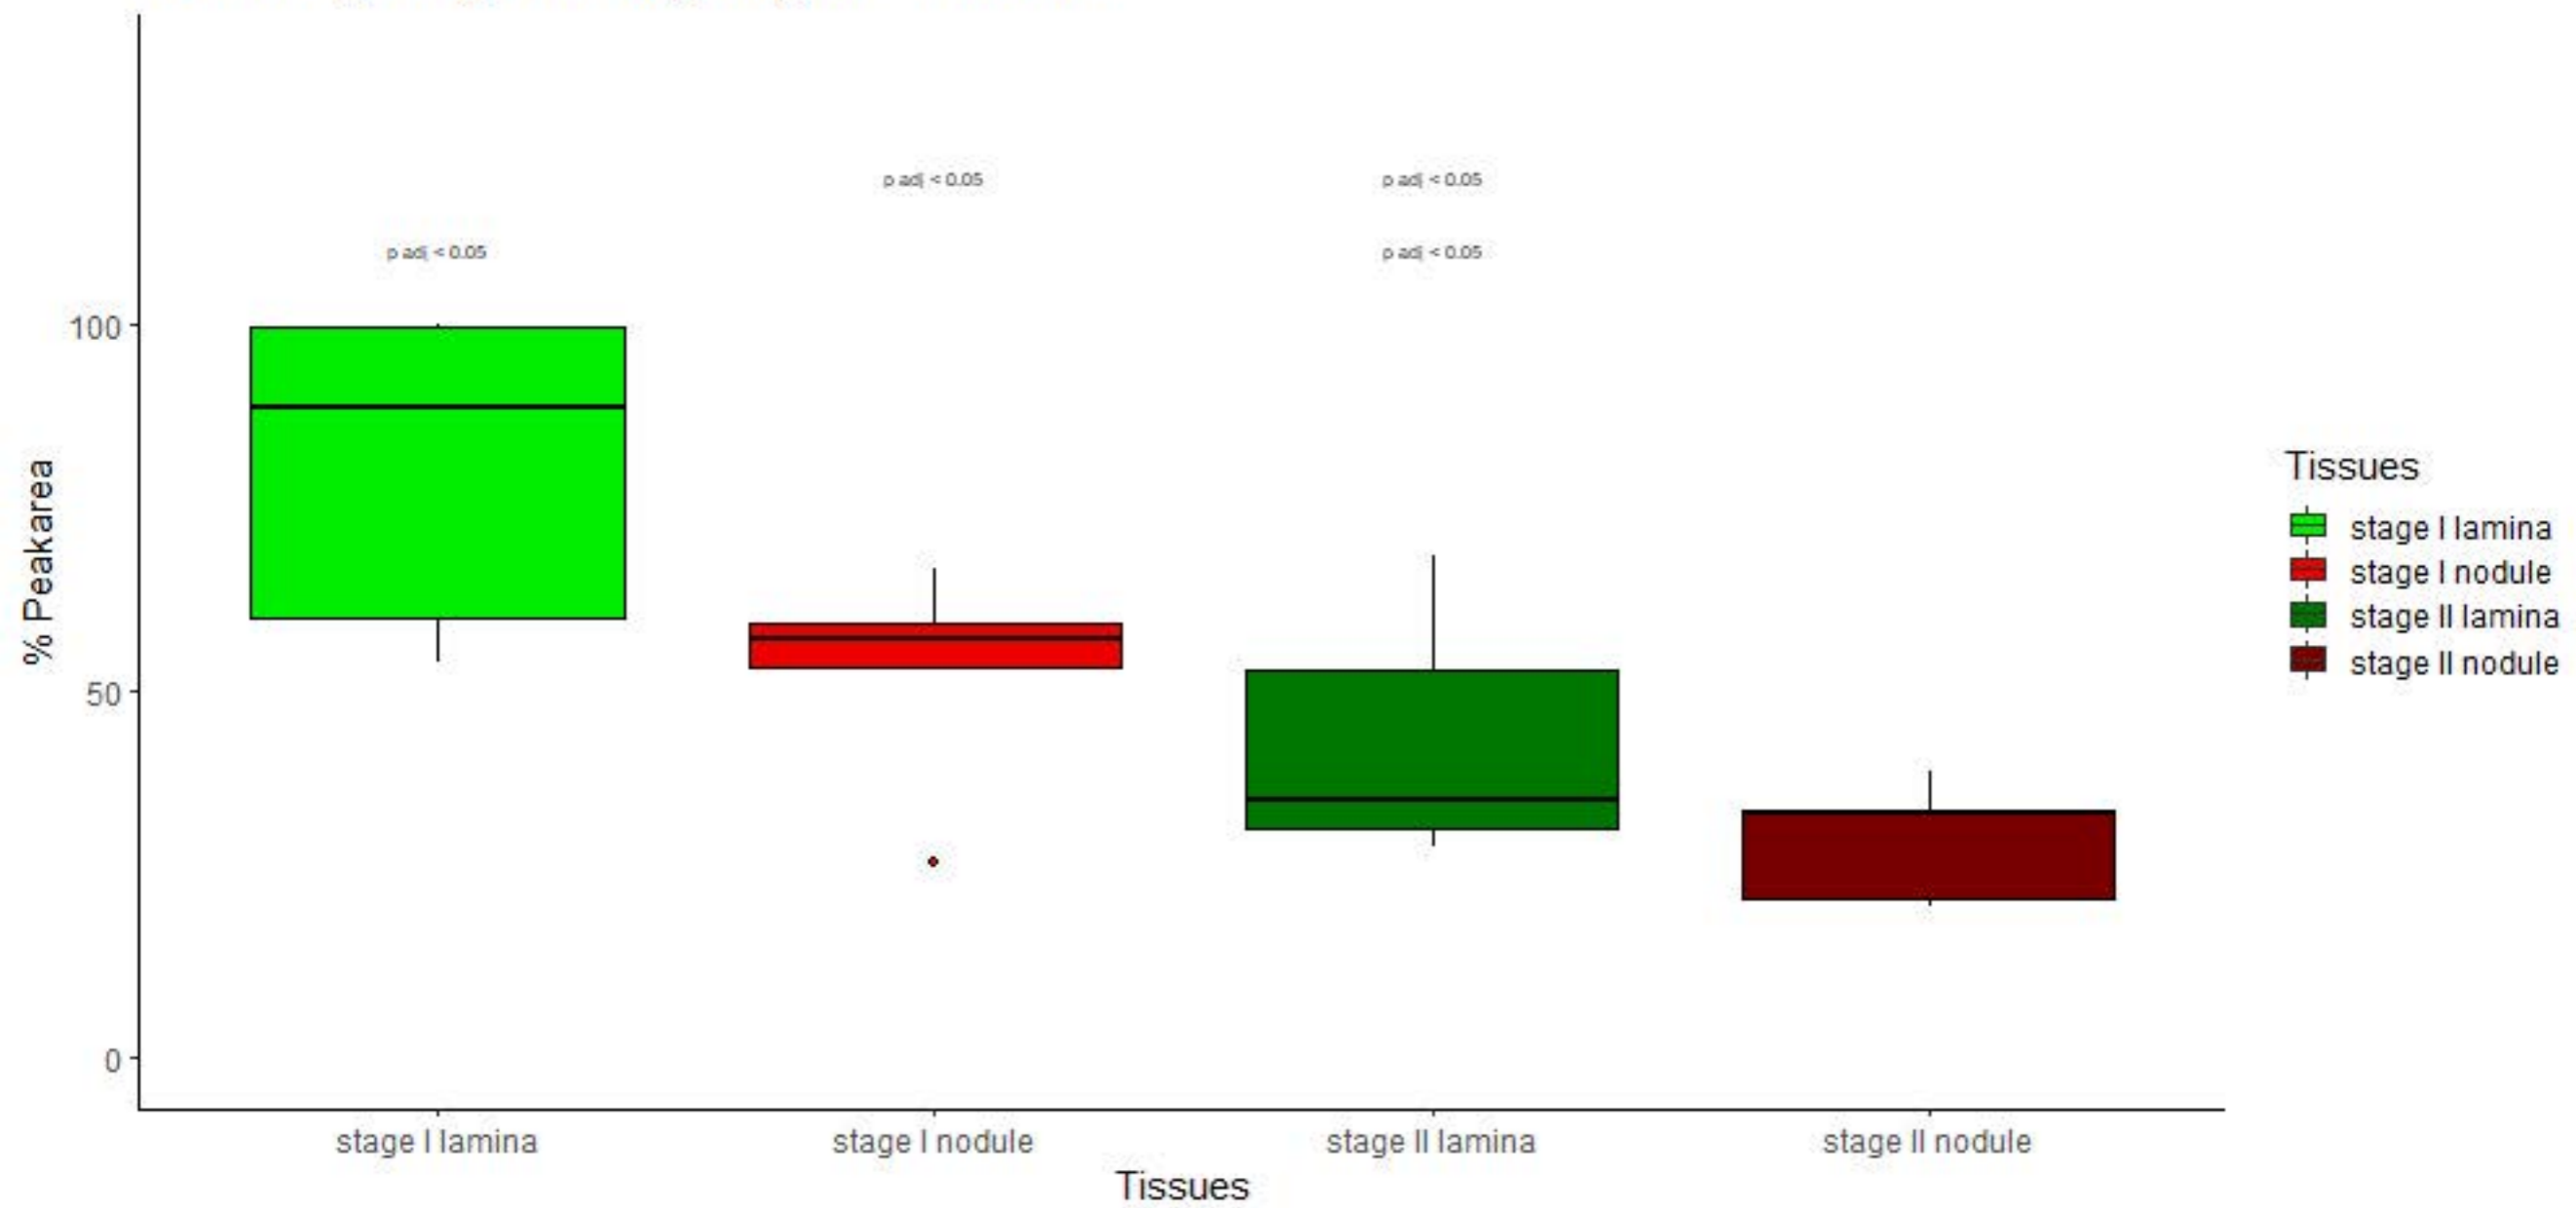

Pyroglutamic\_acid\_RT:2.33\_min\_m/z:130.0499

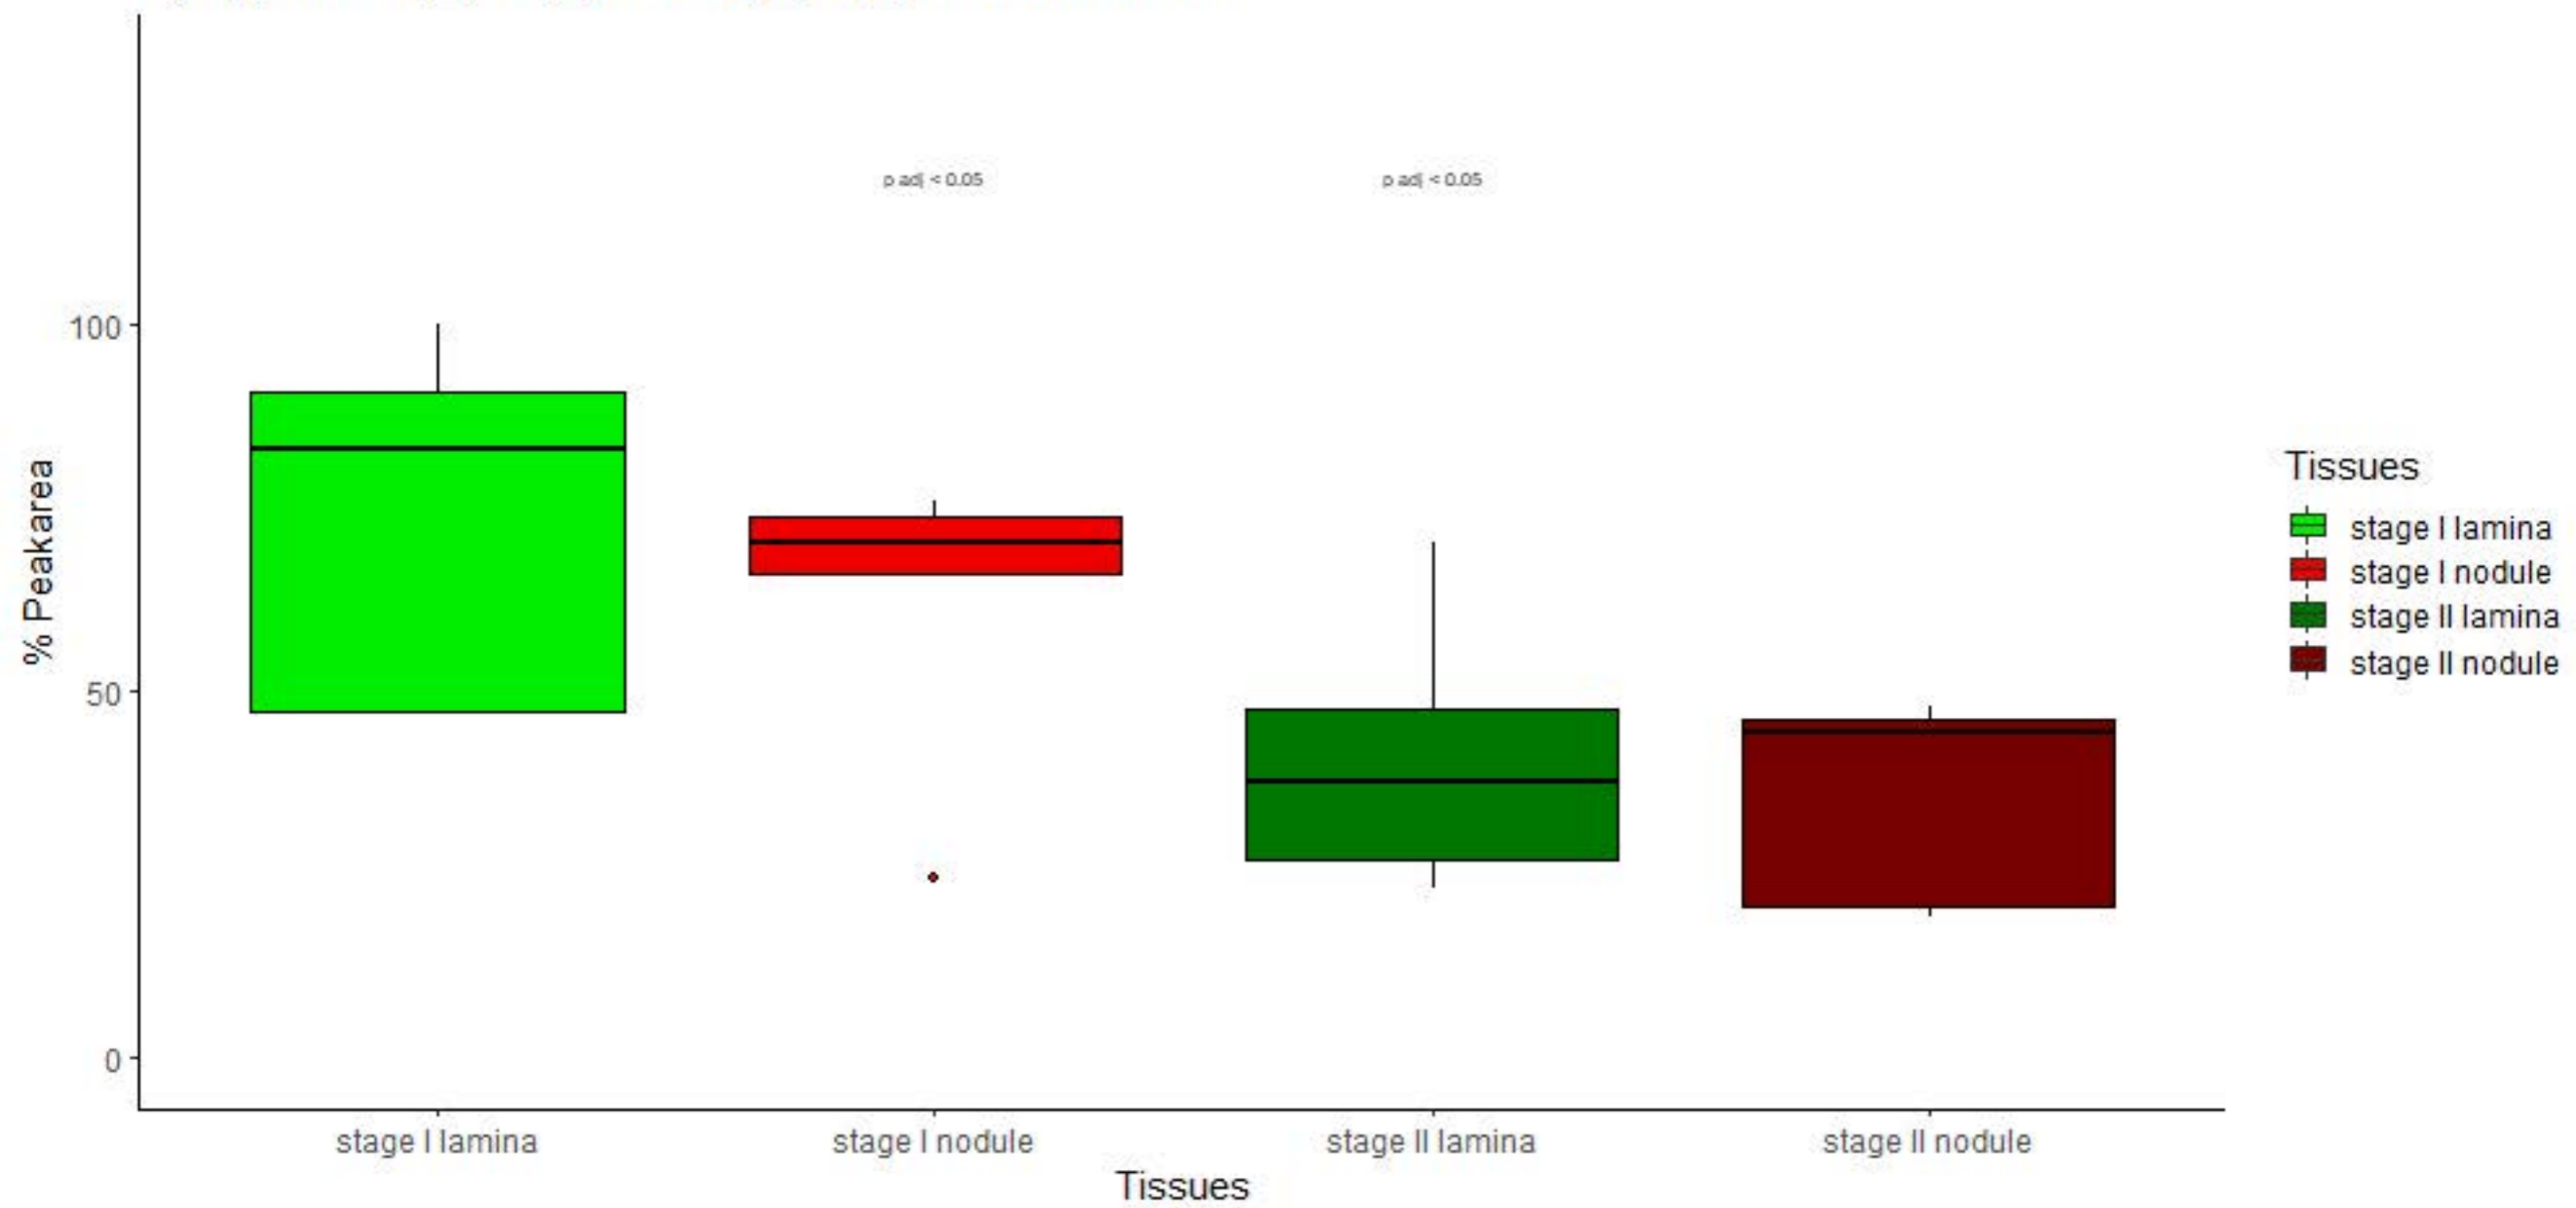

# Spermidine\_RT:2.24\_min\_m/z:146.1652

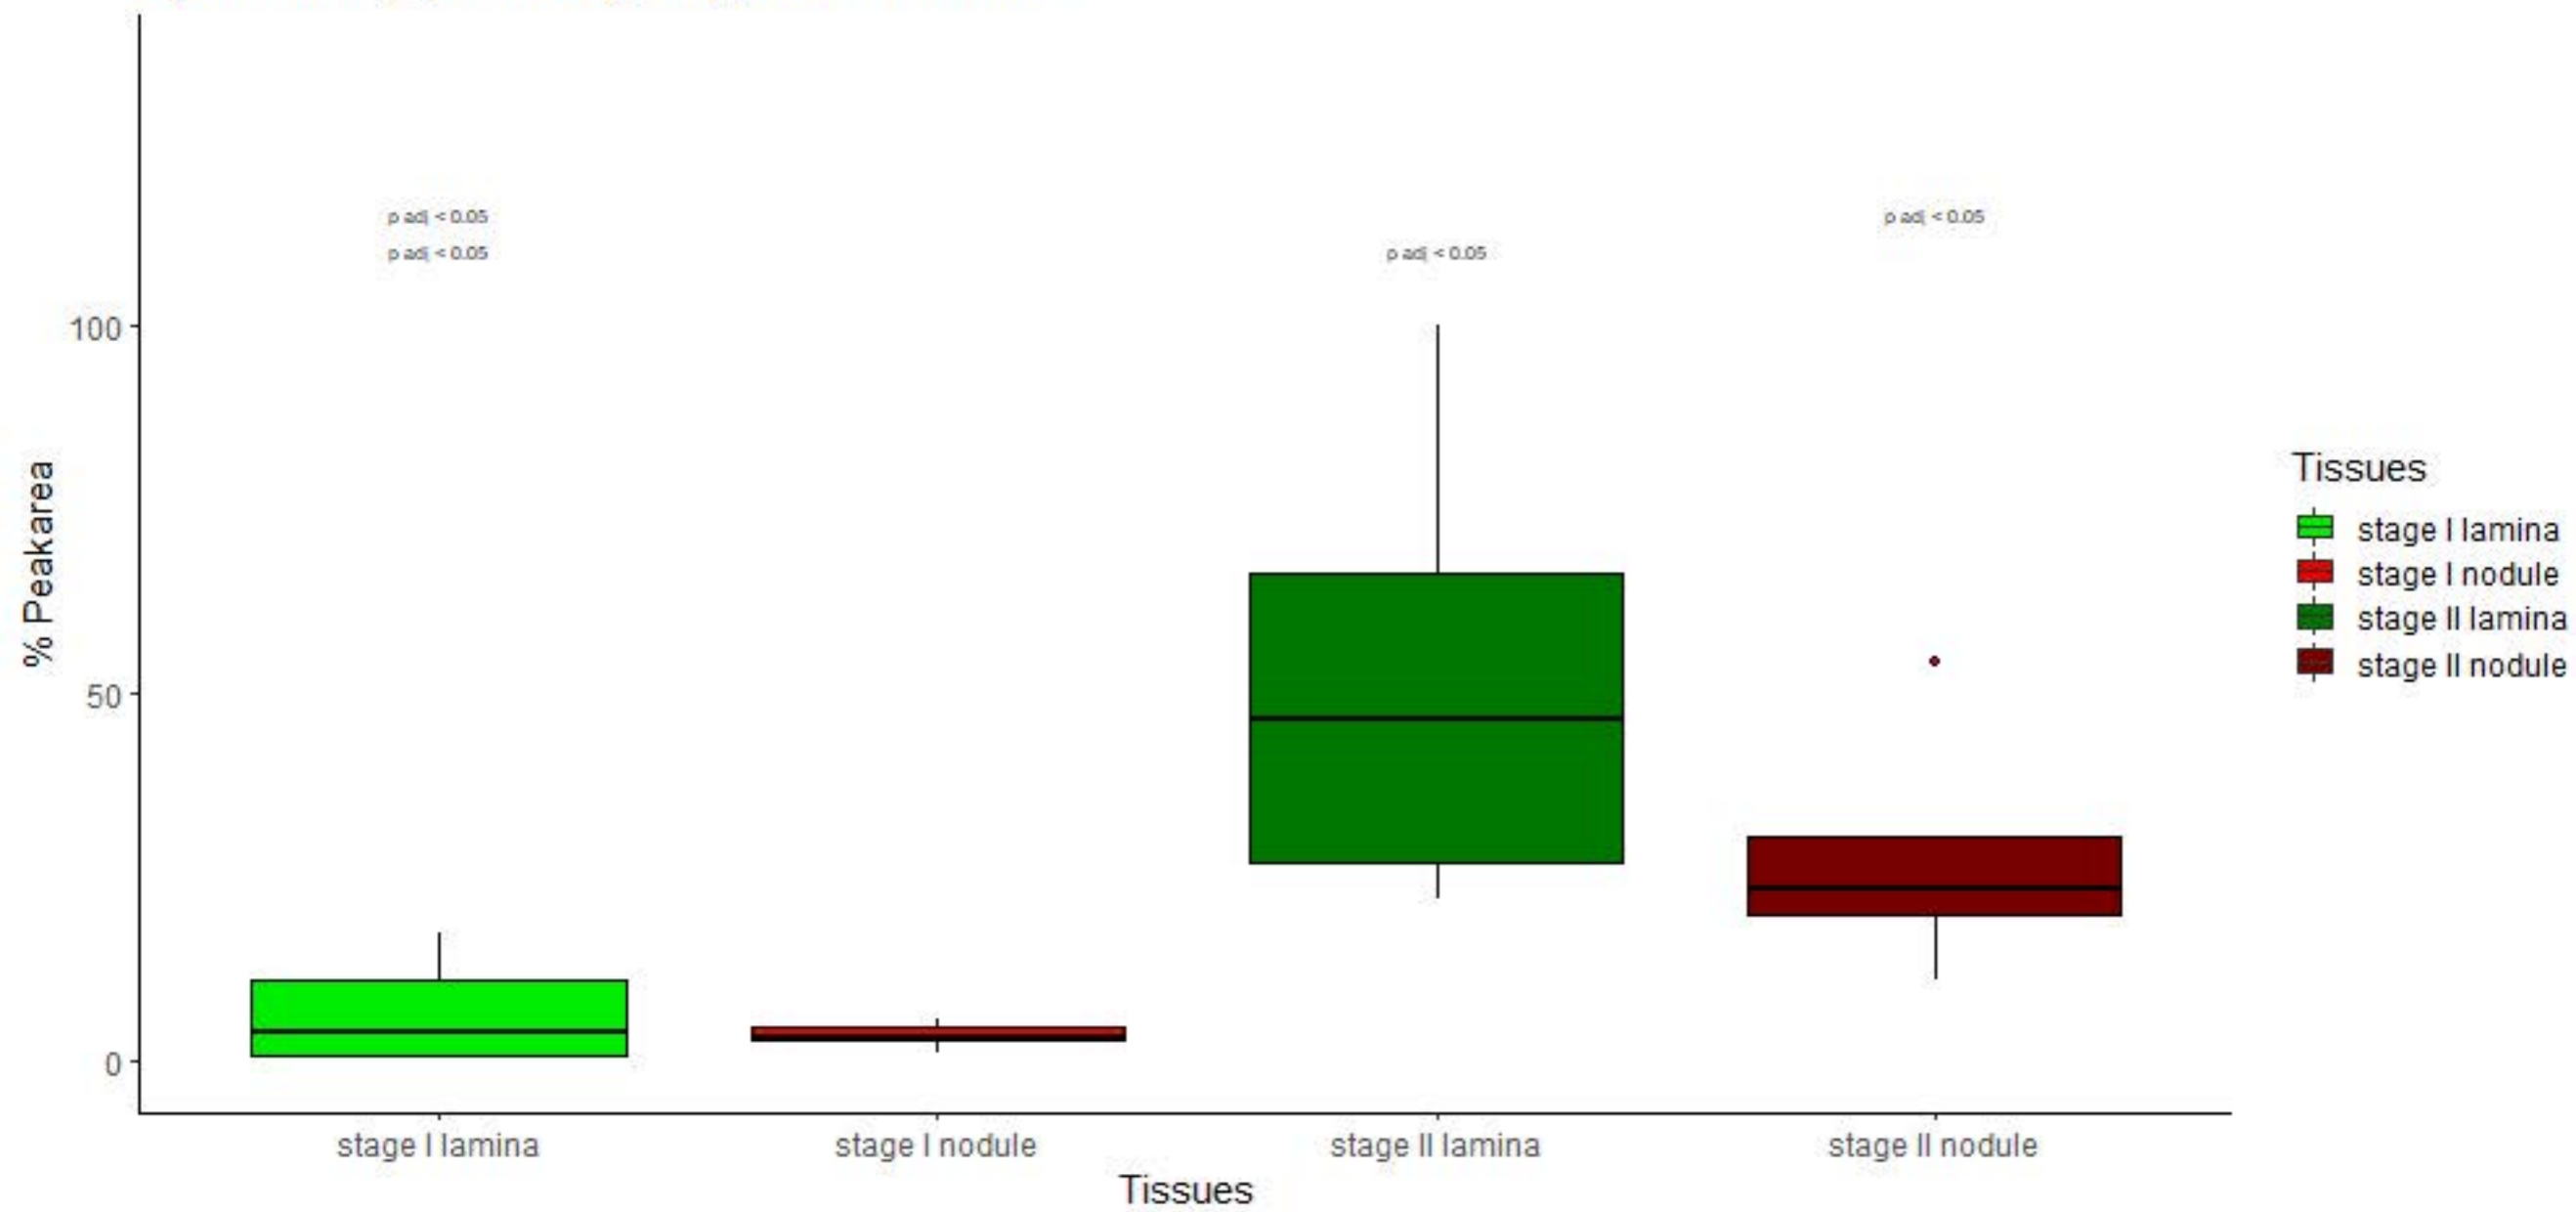

# Pavettamine\_RT:2.03\_min\_m/z:252.1918

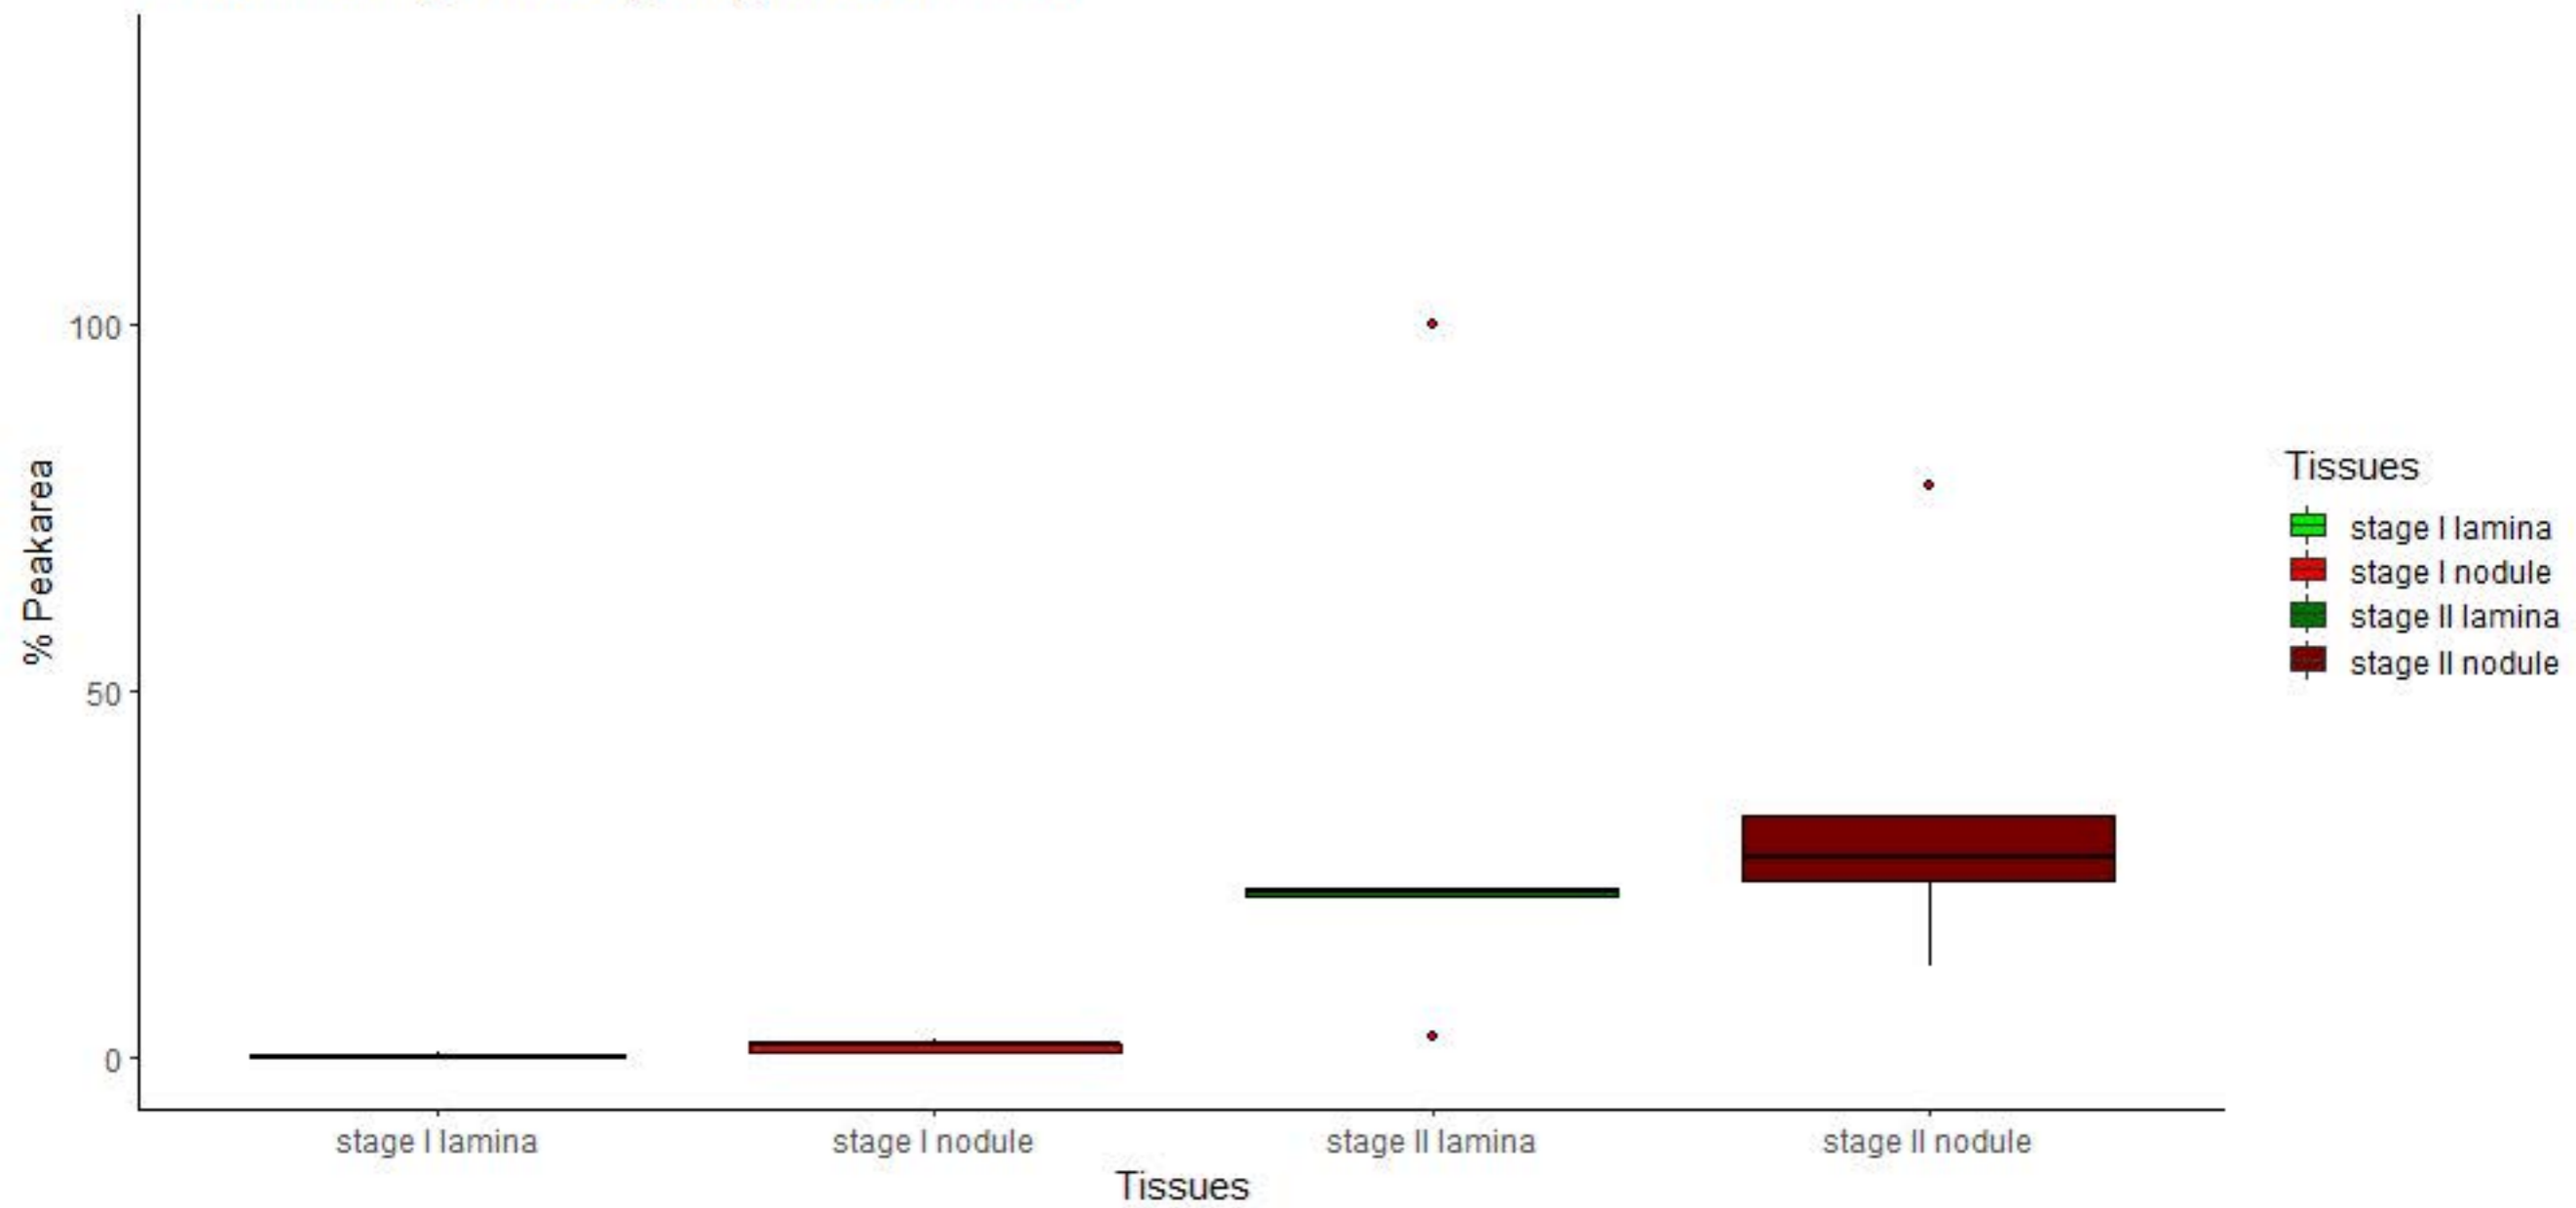

# Asparagine\_RT:2.34\_min\_m/z:133.0608

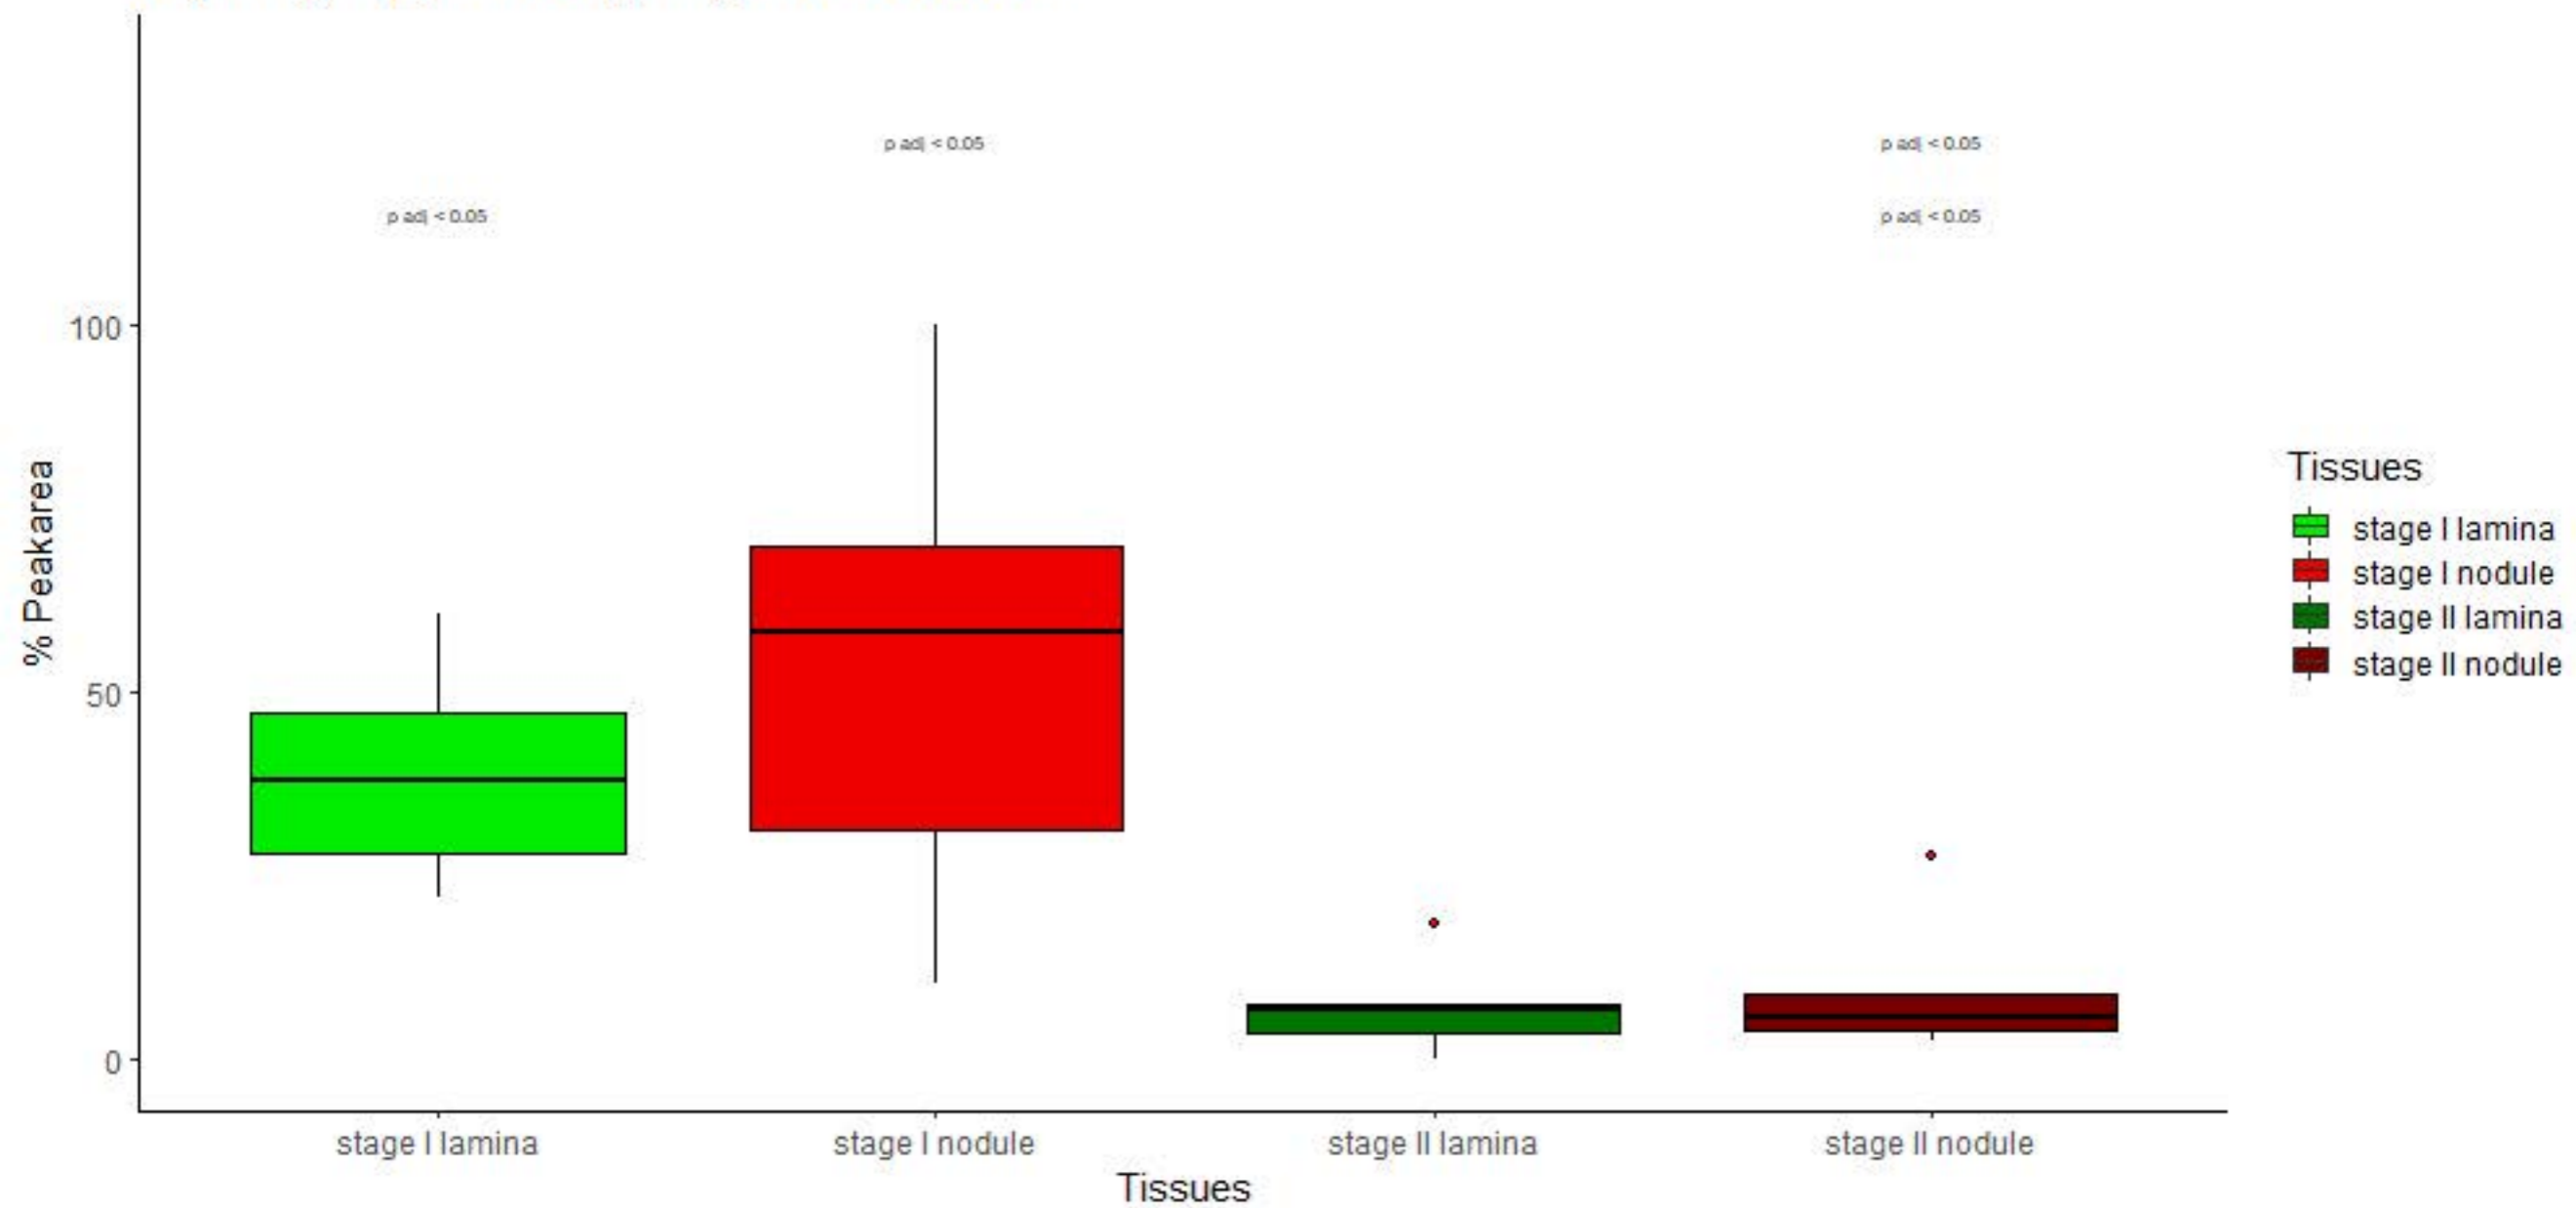

# Methionine\_RT:3.43\_min\_m/z:150.0583

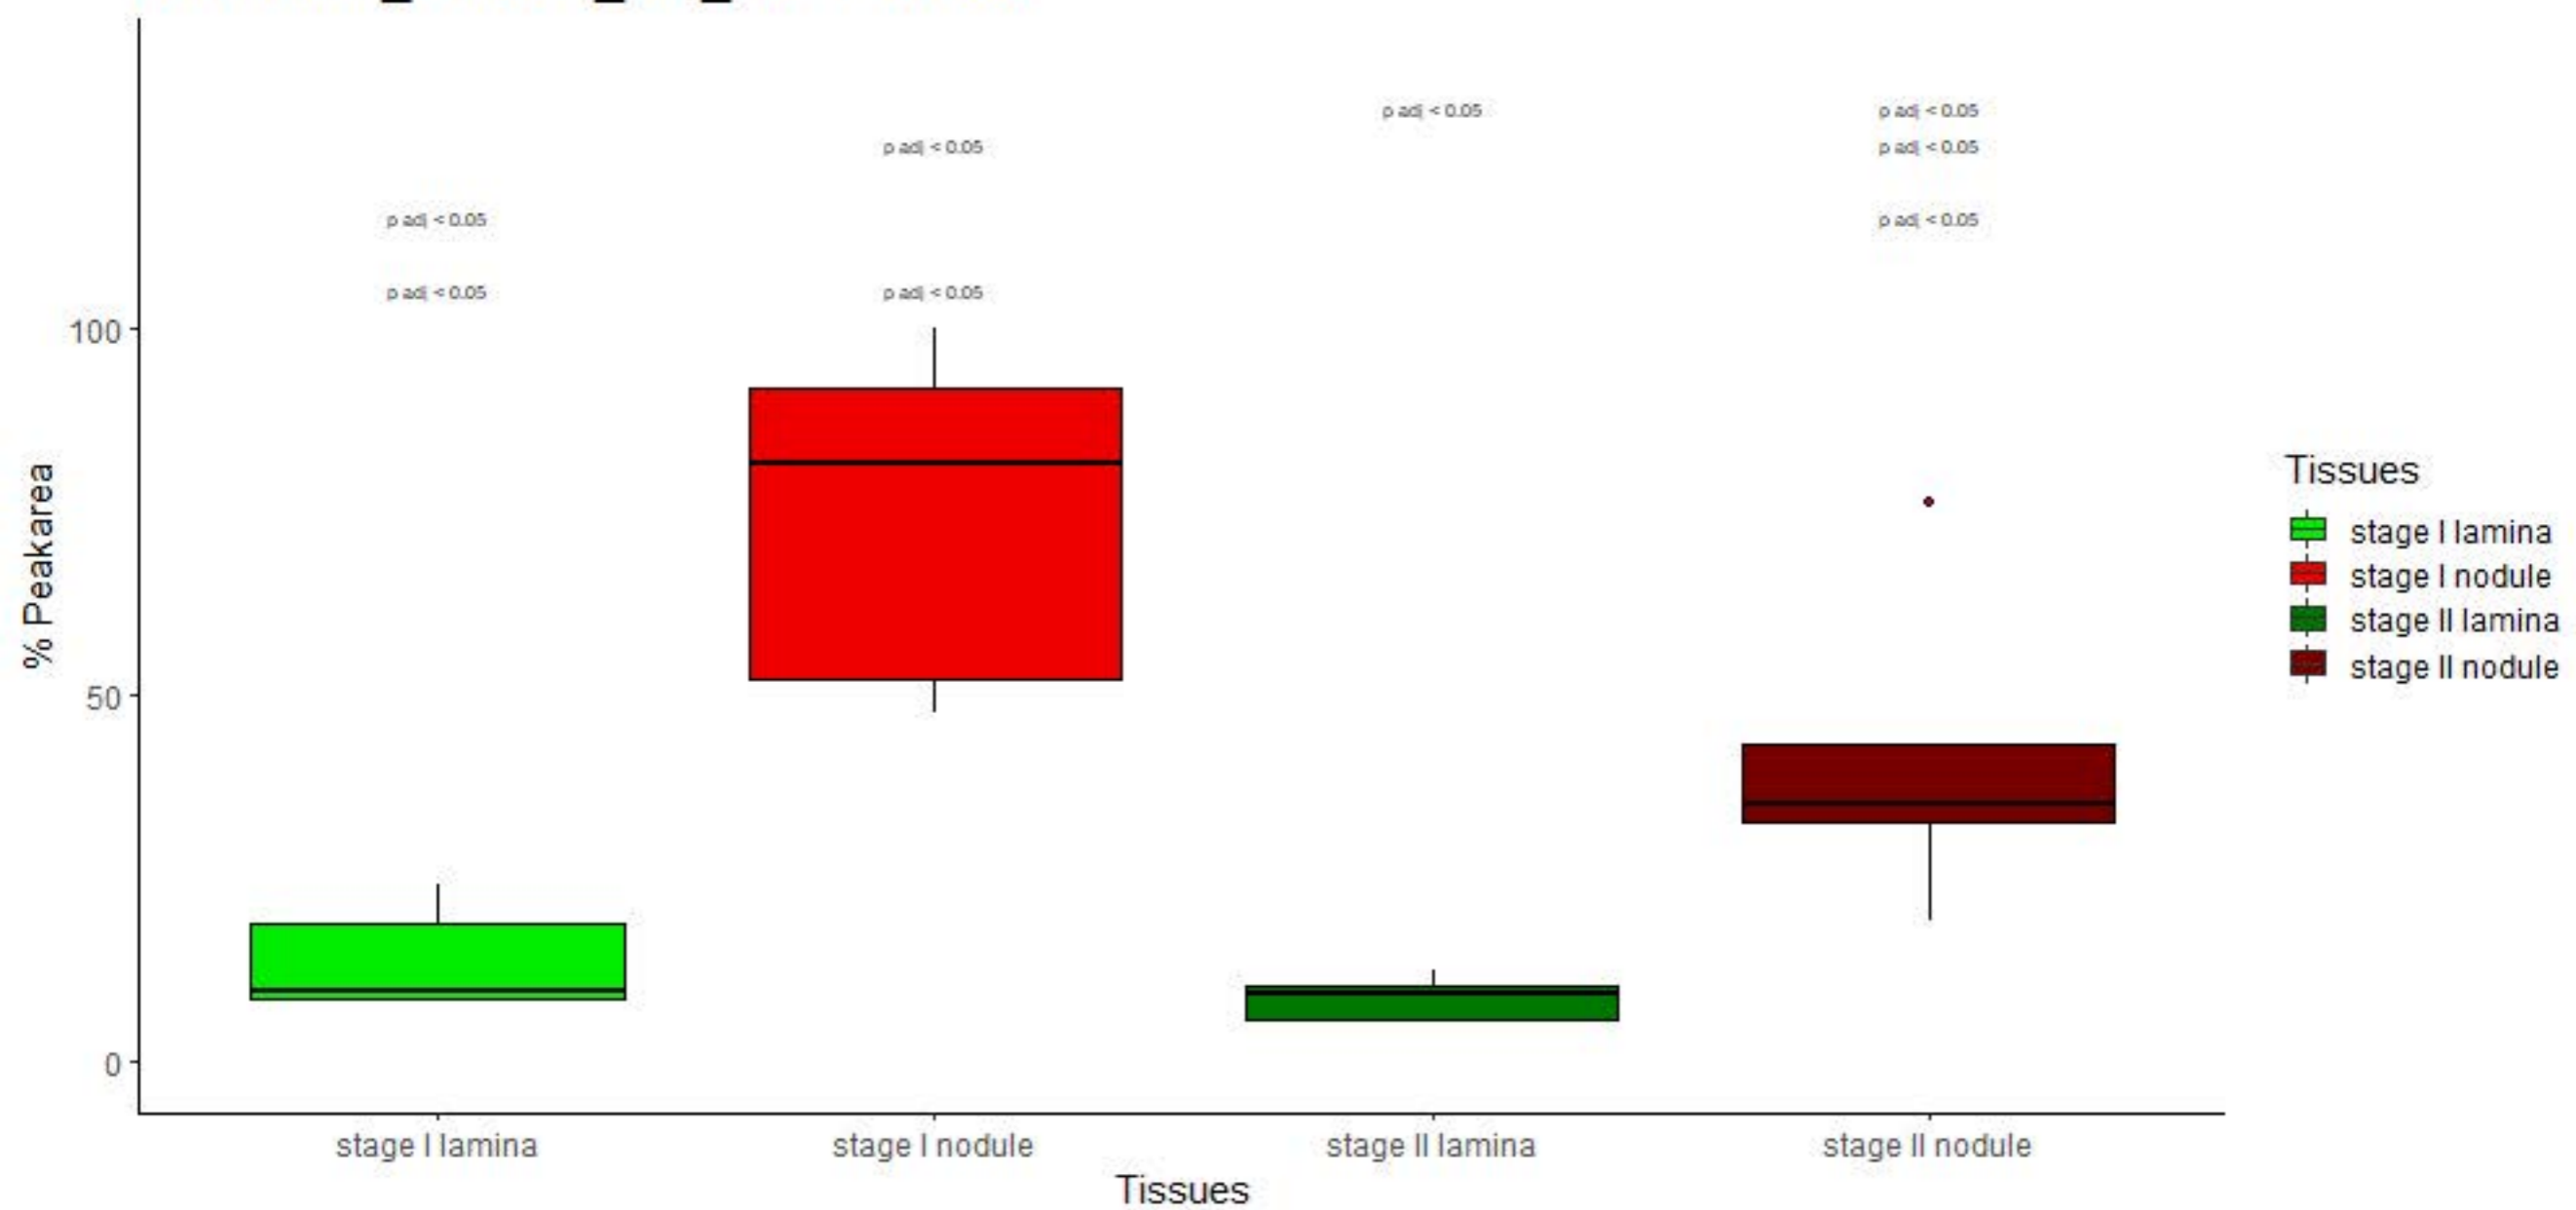

# Trimethyllysine\_RT:2.18\_min\_m/z:189.1598

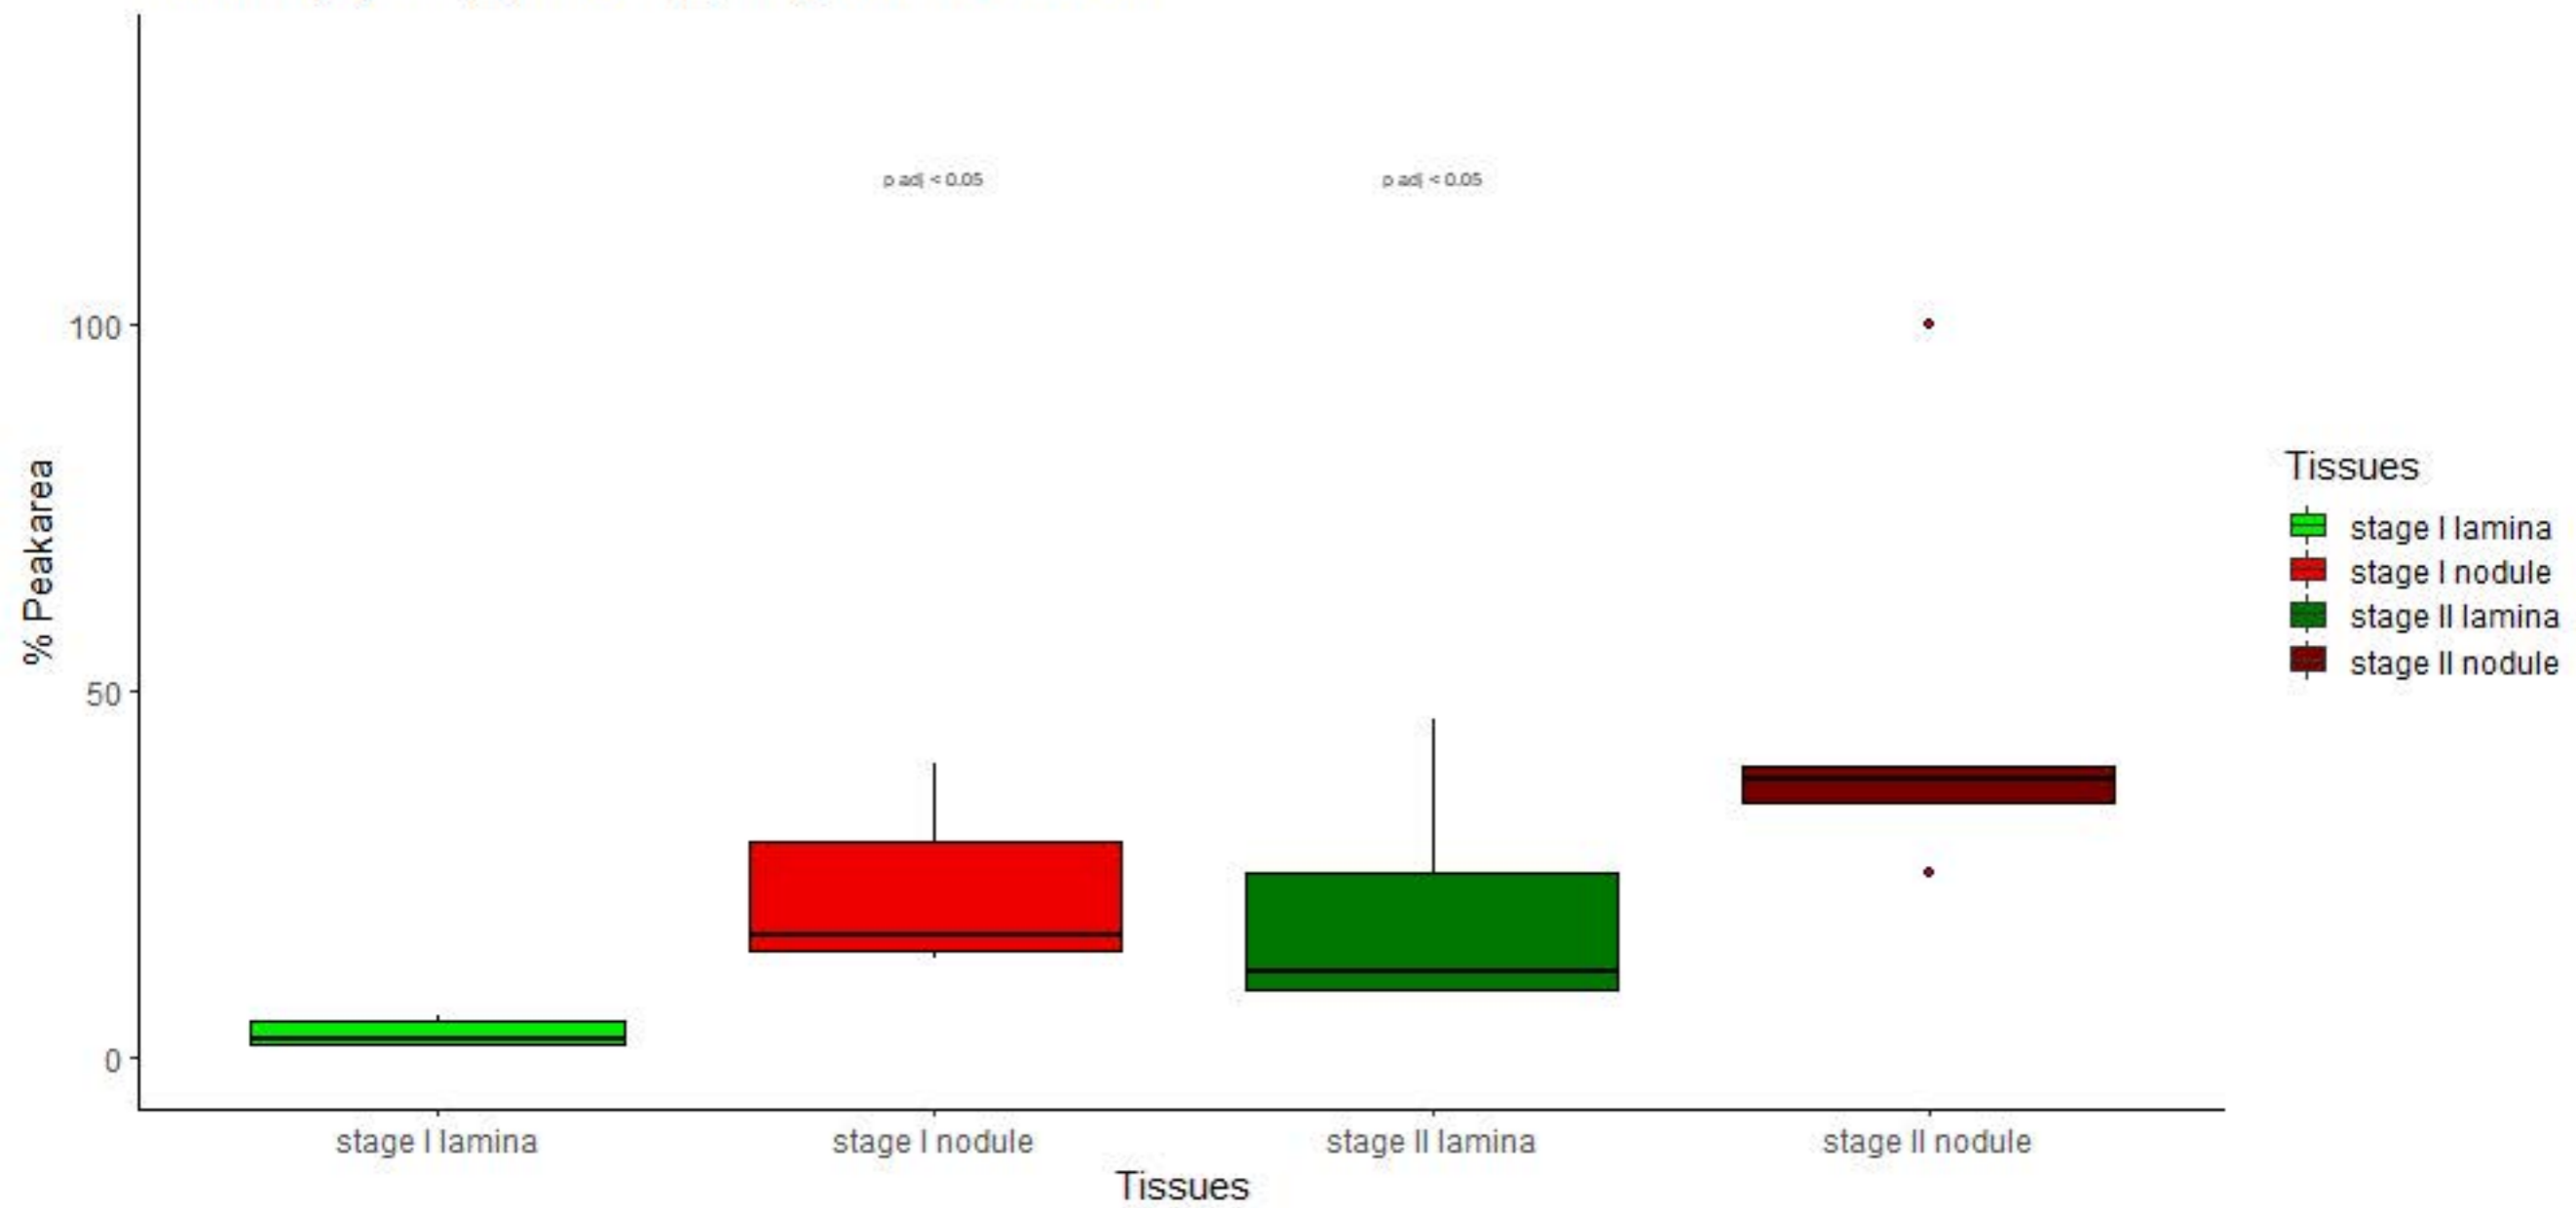

# Phenylalanine\_RT:11.48\_min\_m/z:166.0863

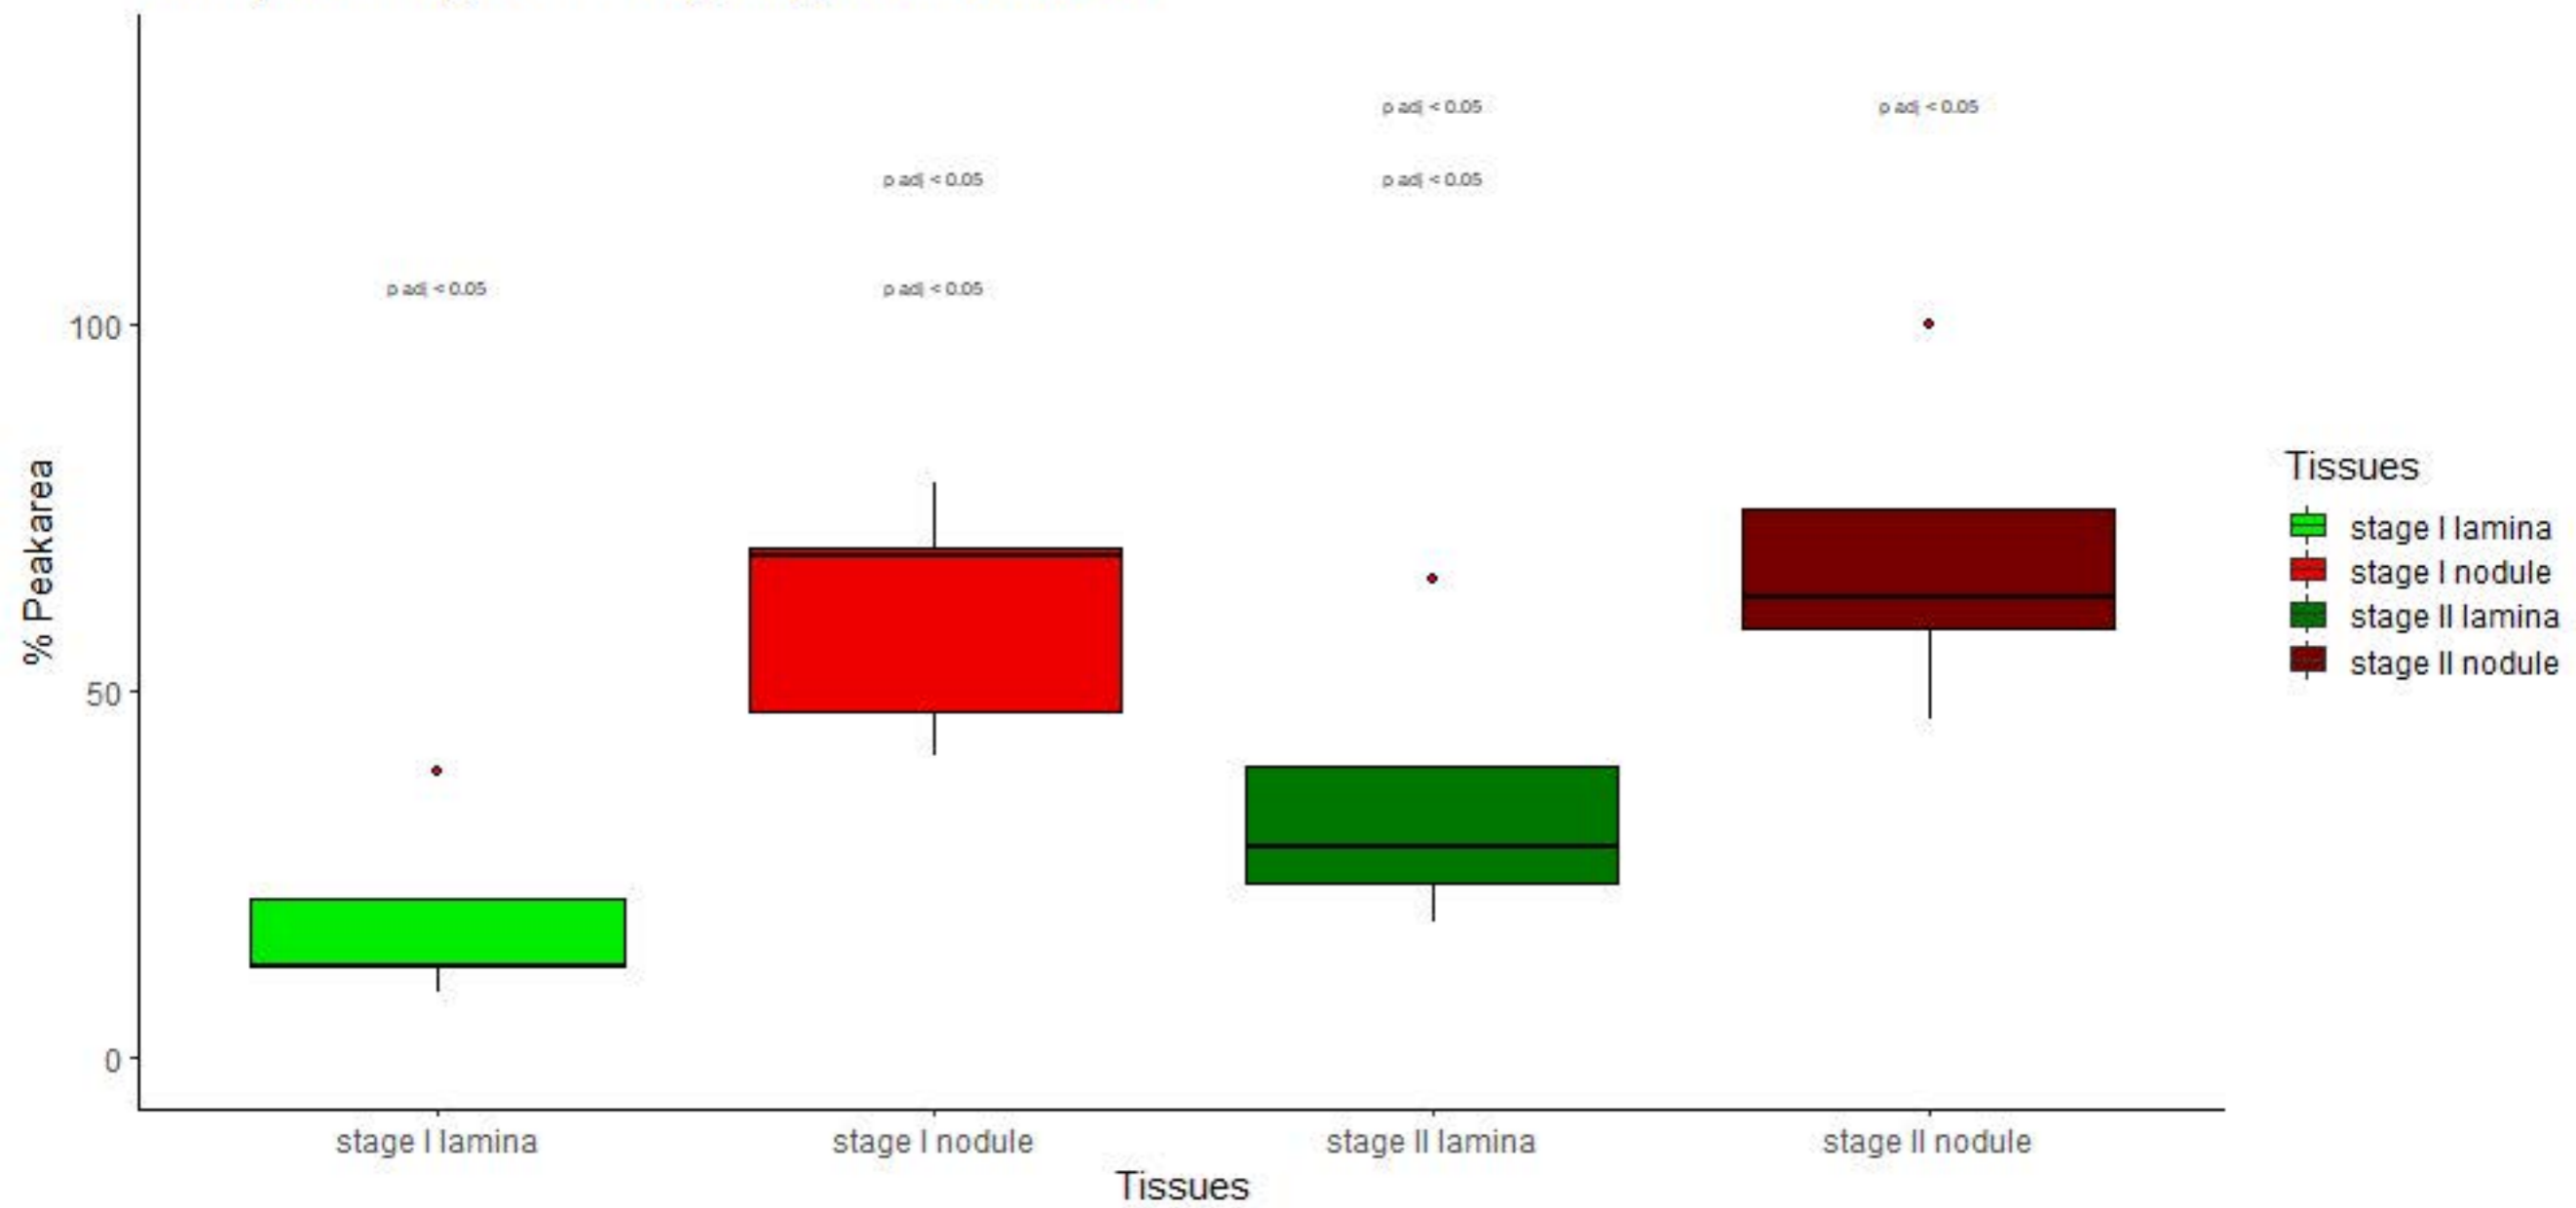



# Tyrosine\_RT:5.43\_min\_m/z:182.0812

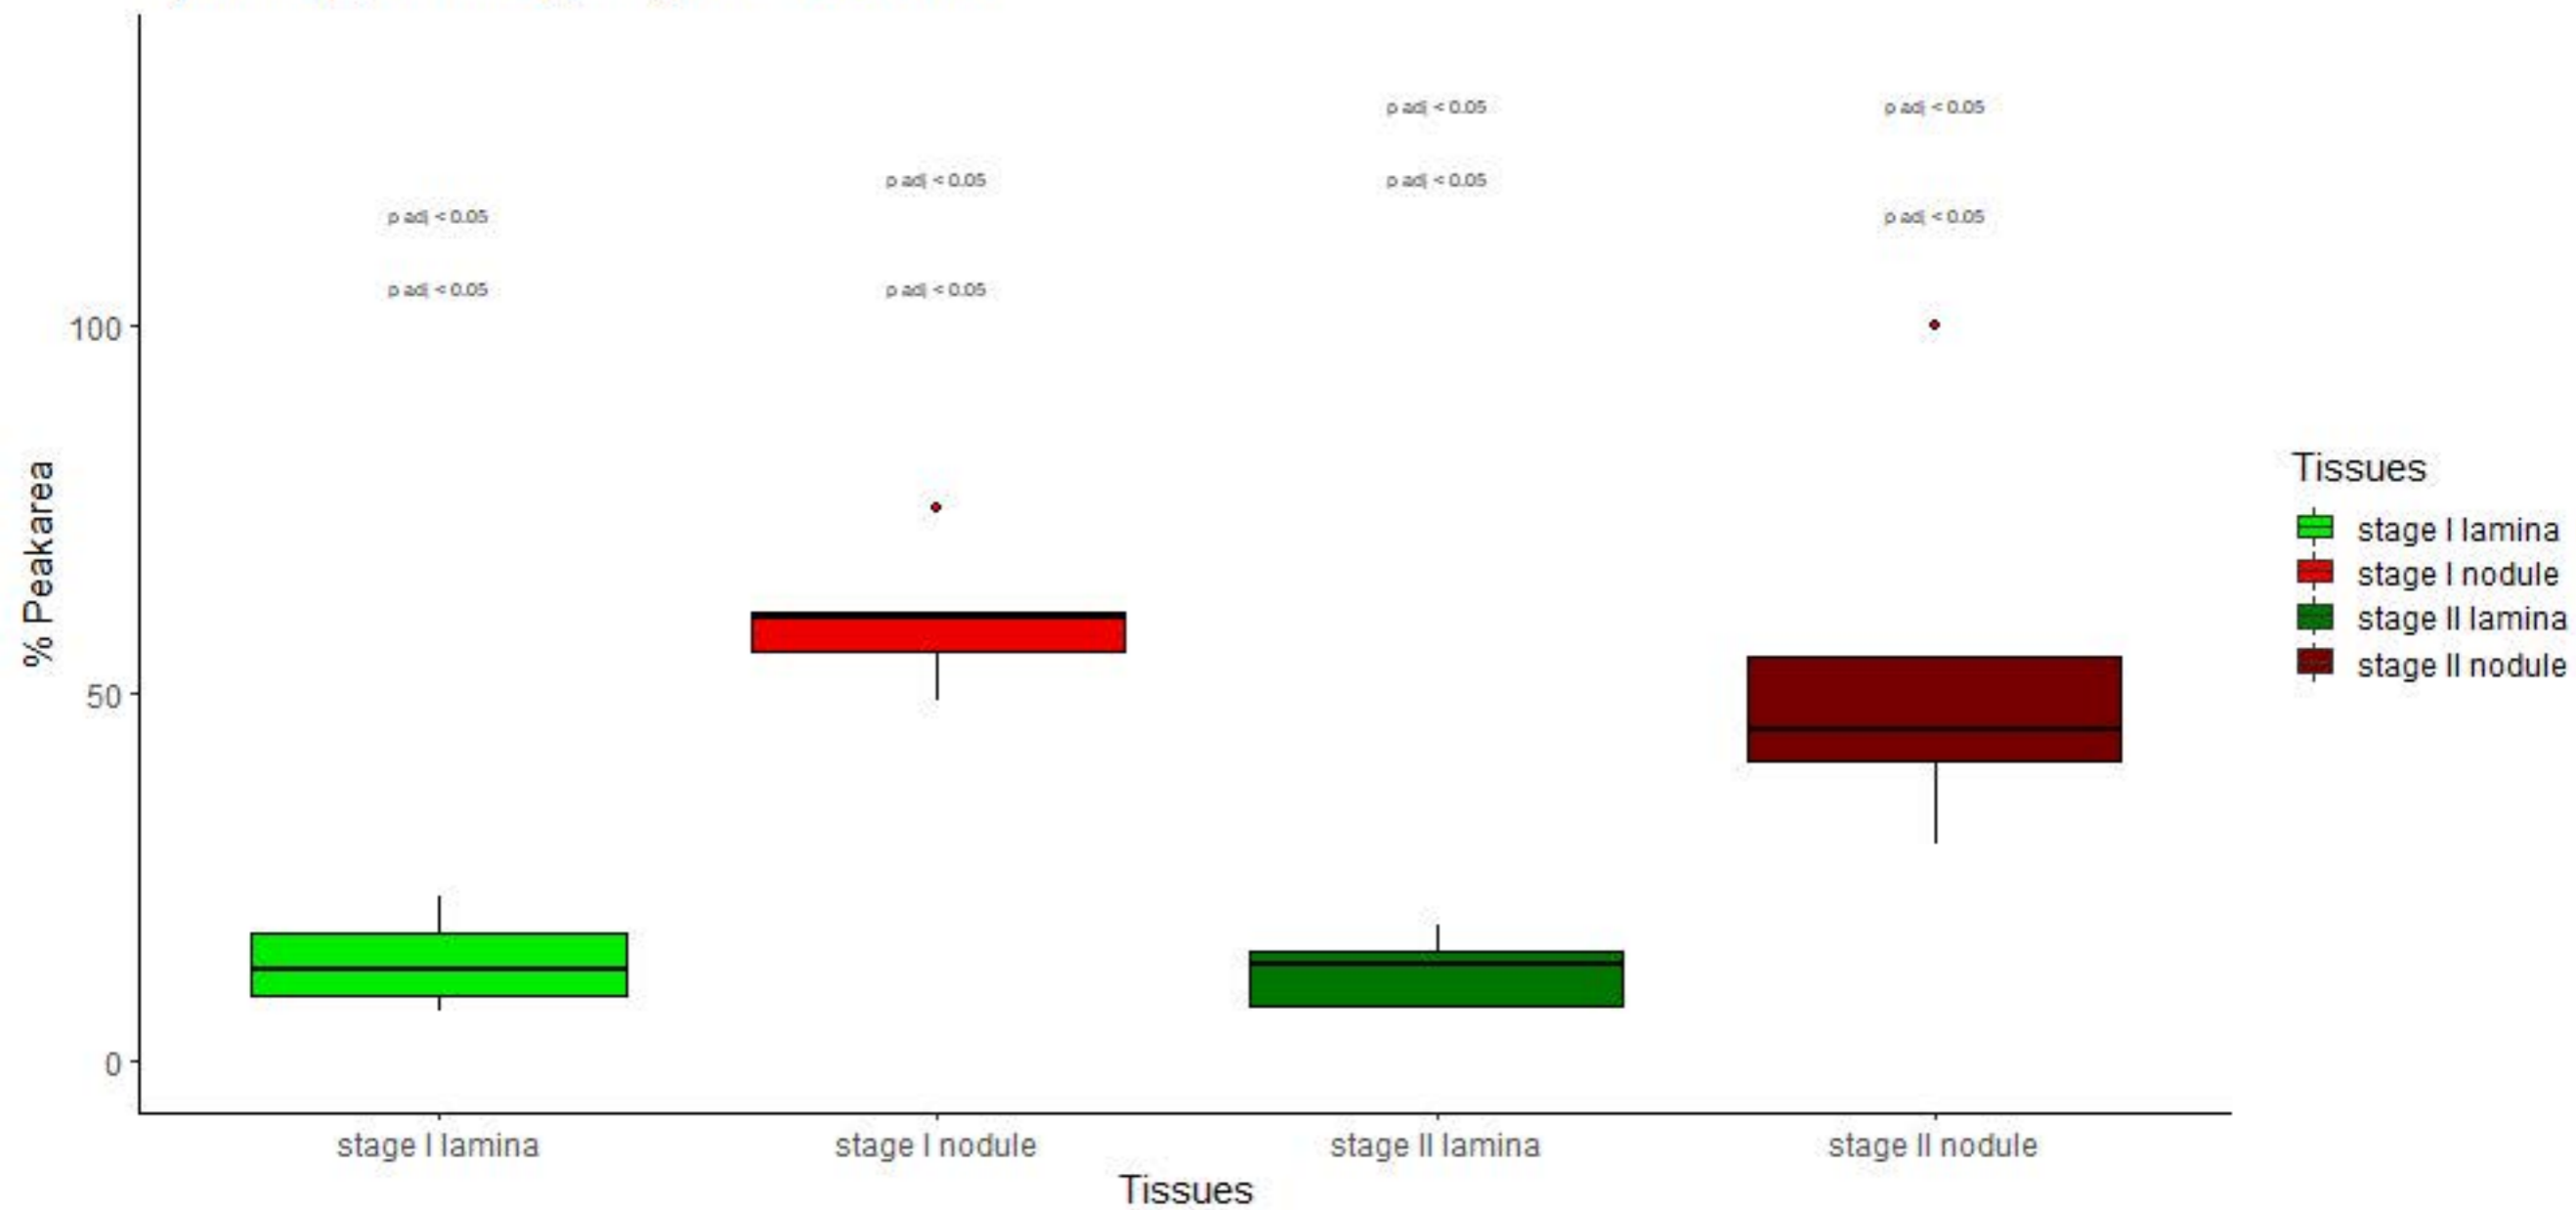

# Kynurenin\_RT:11.23\_min\_m/z:209.0921

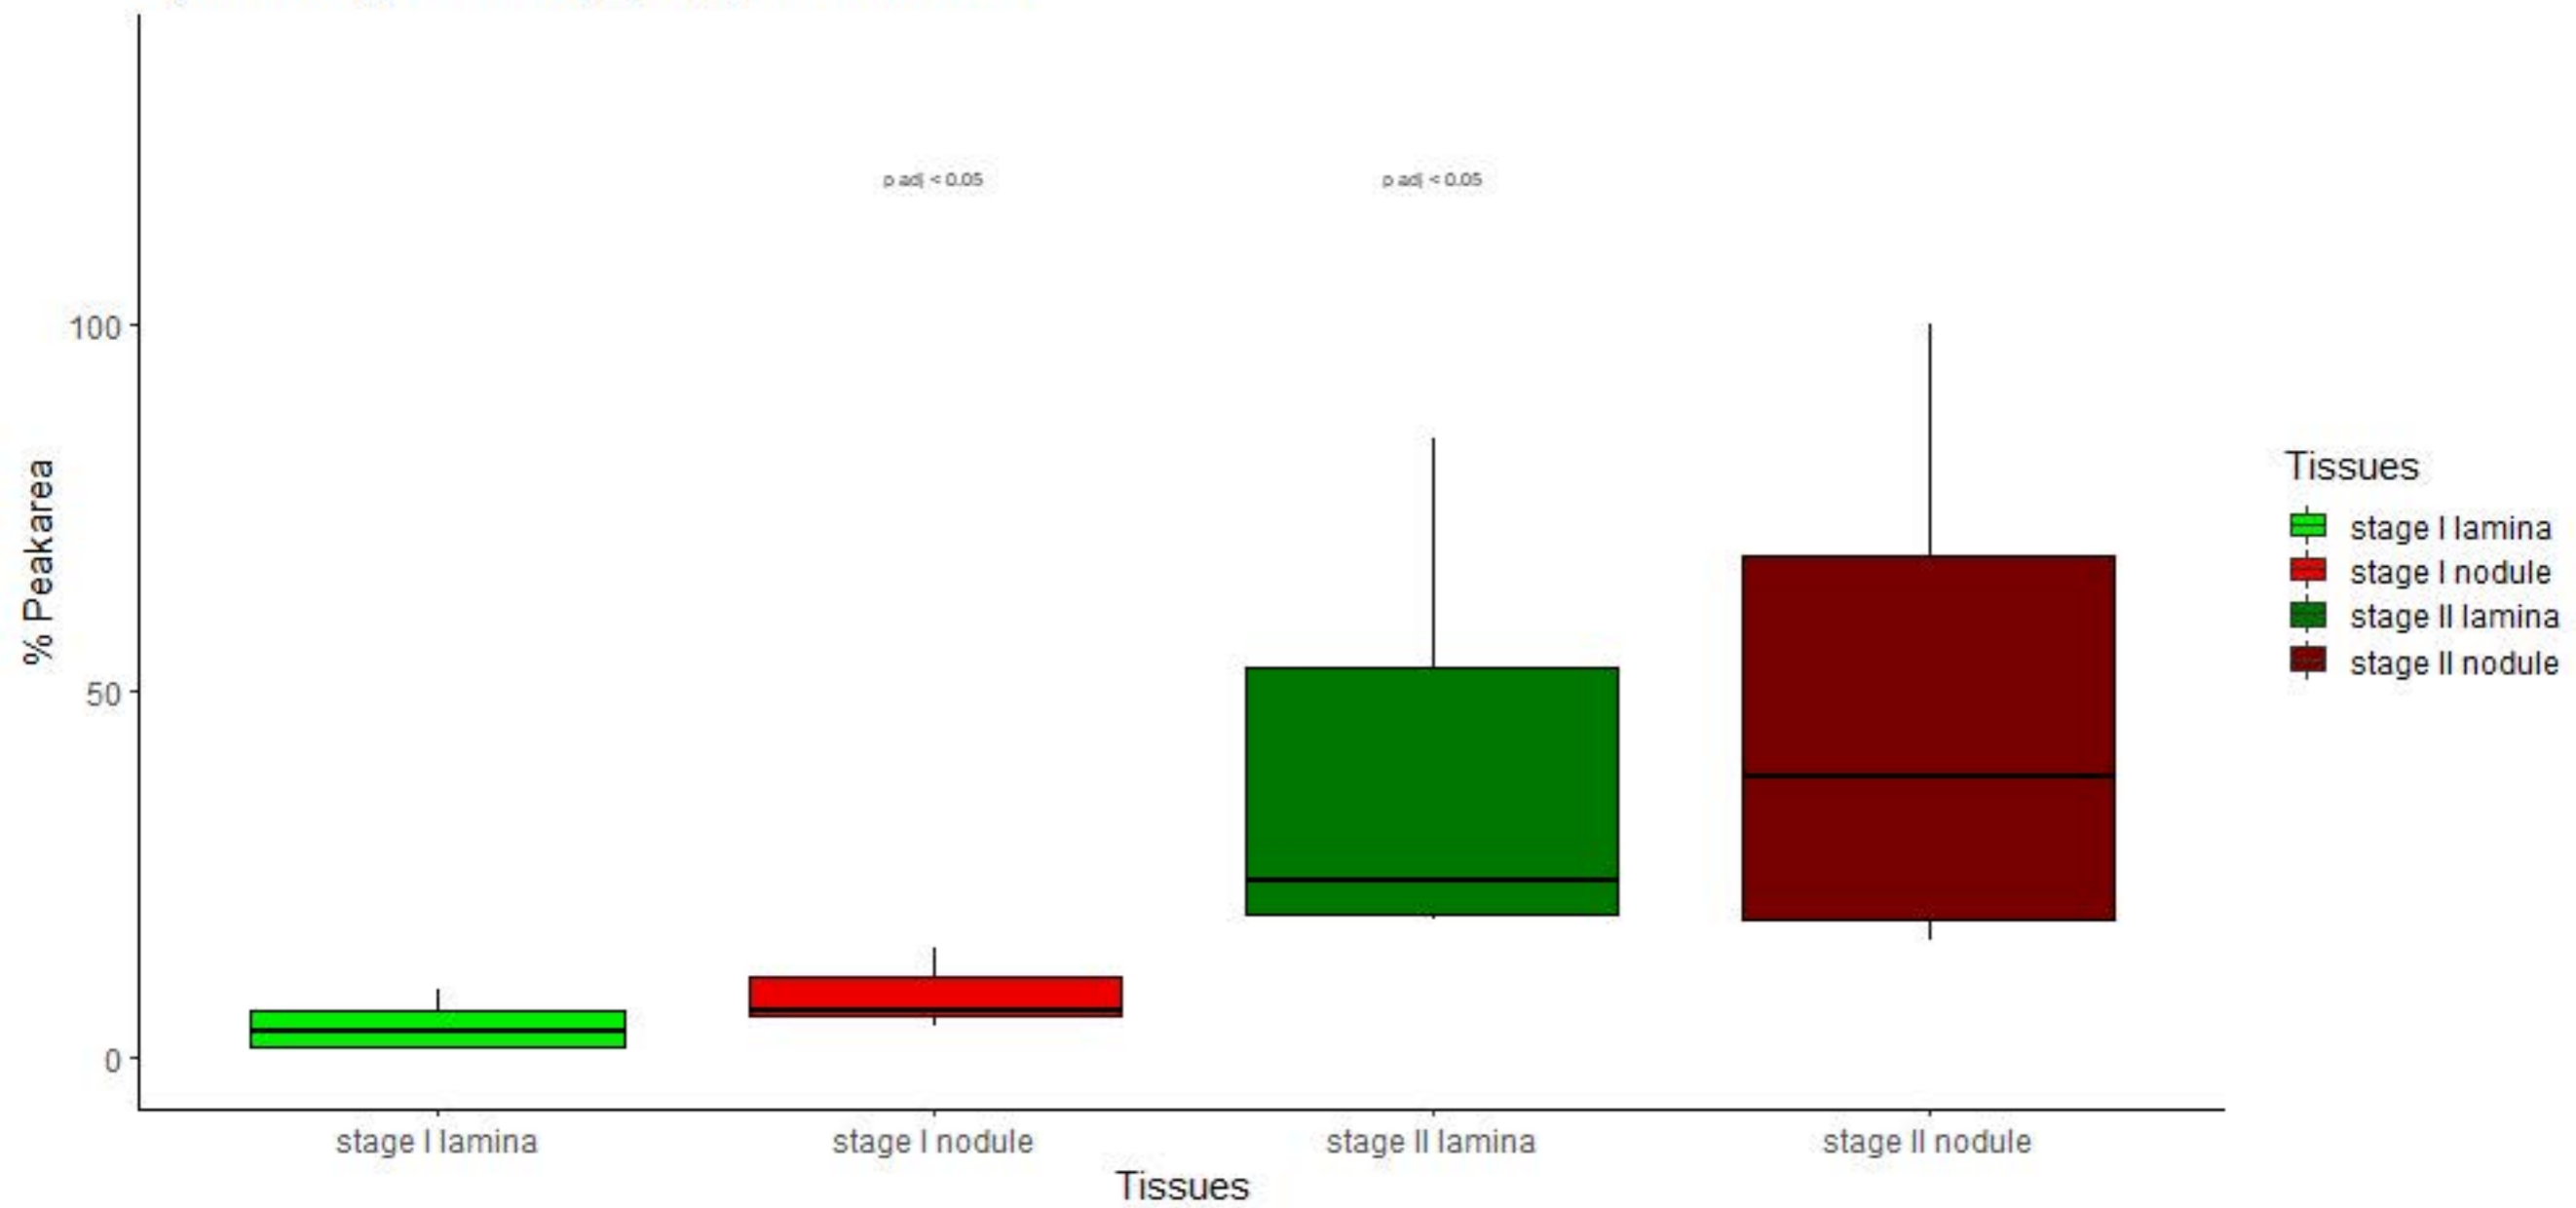

Creatine\_RT:2.64\_min\_m/z:132.0768

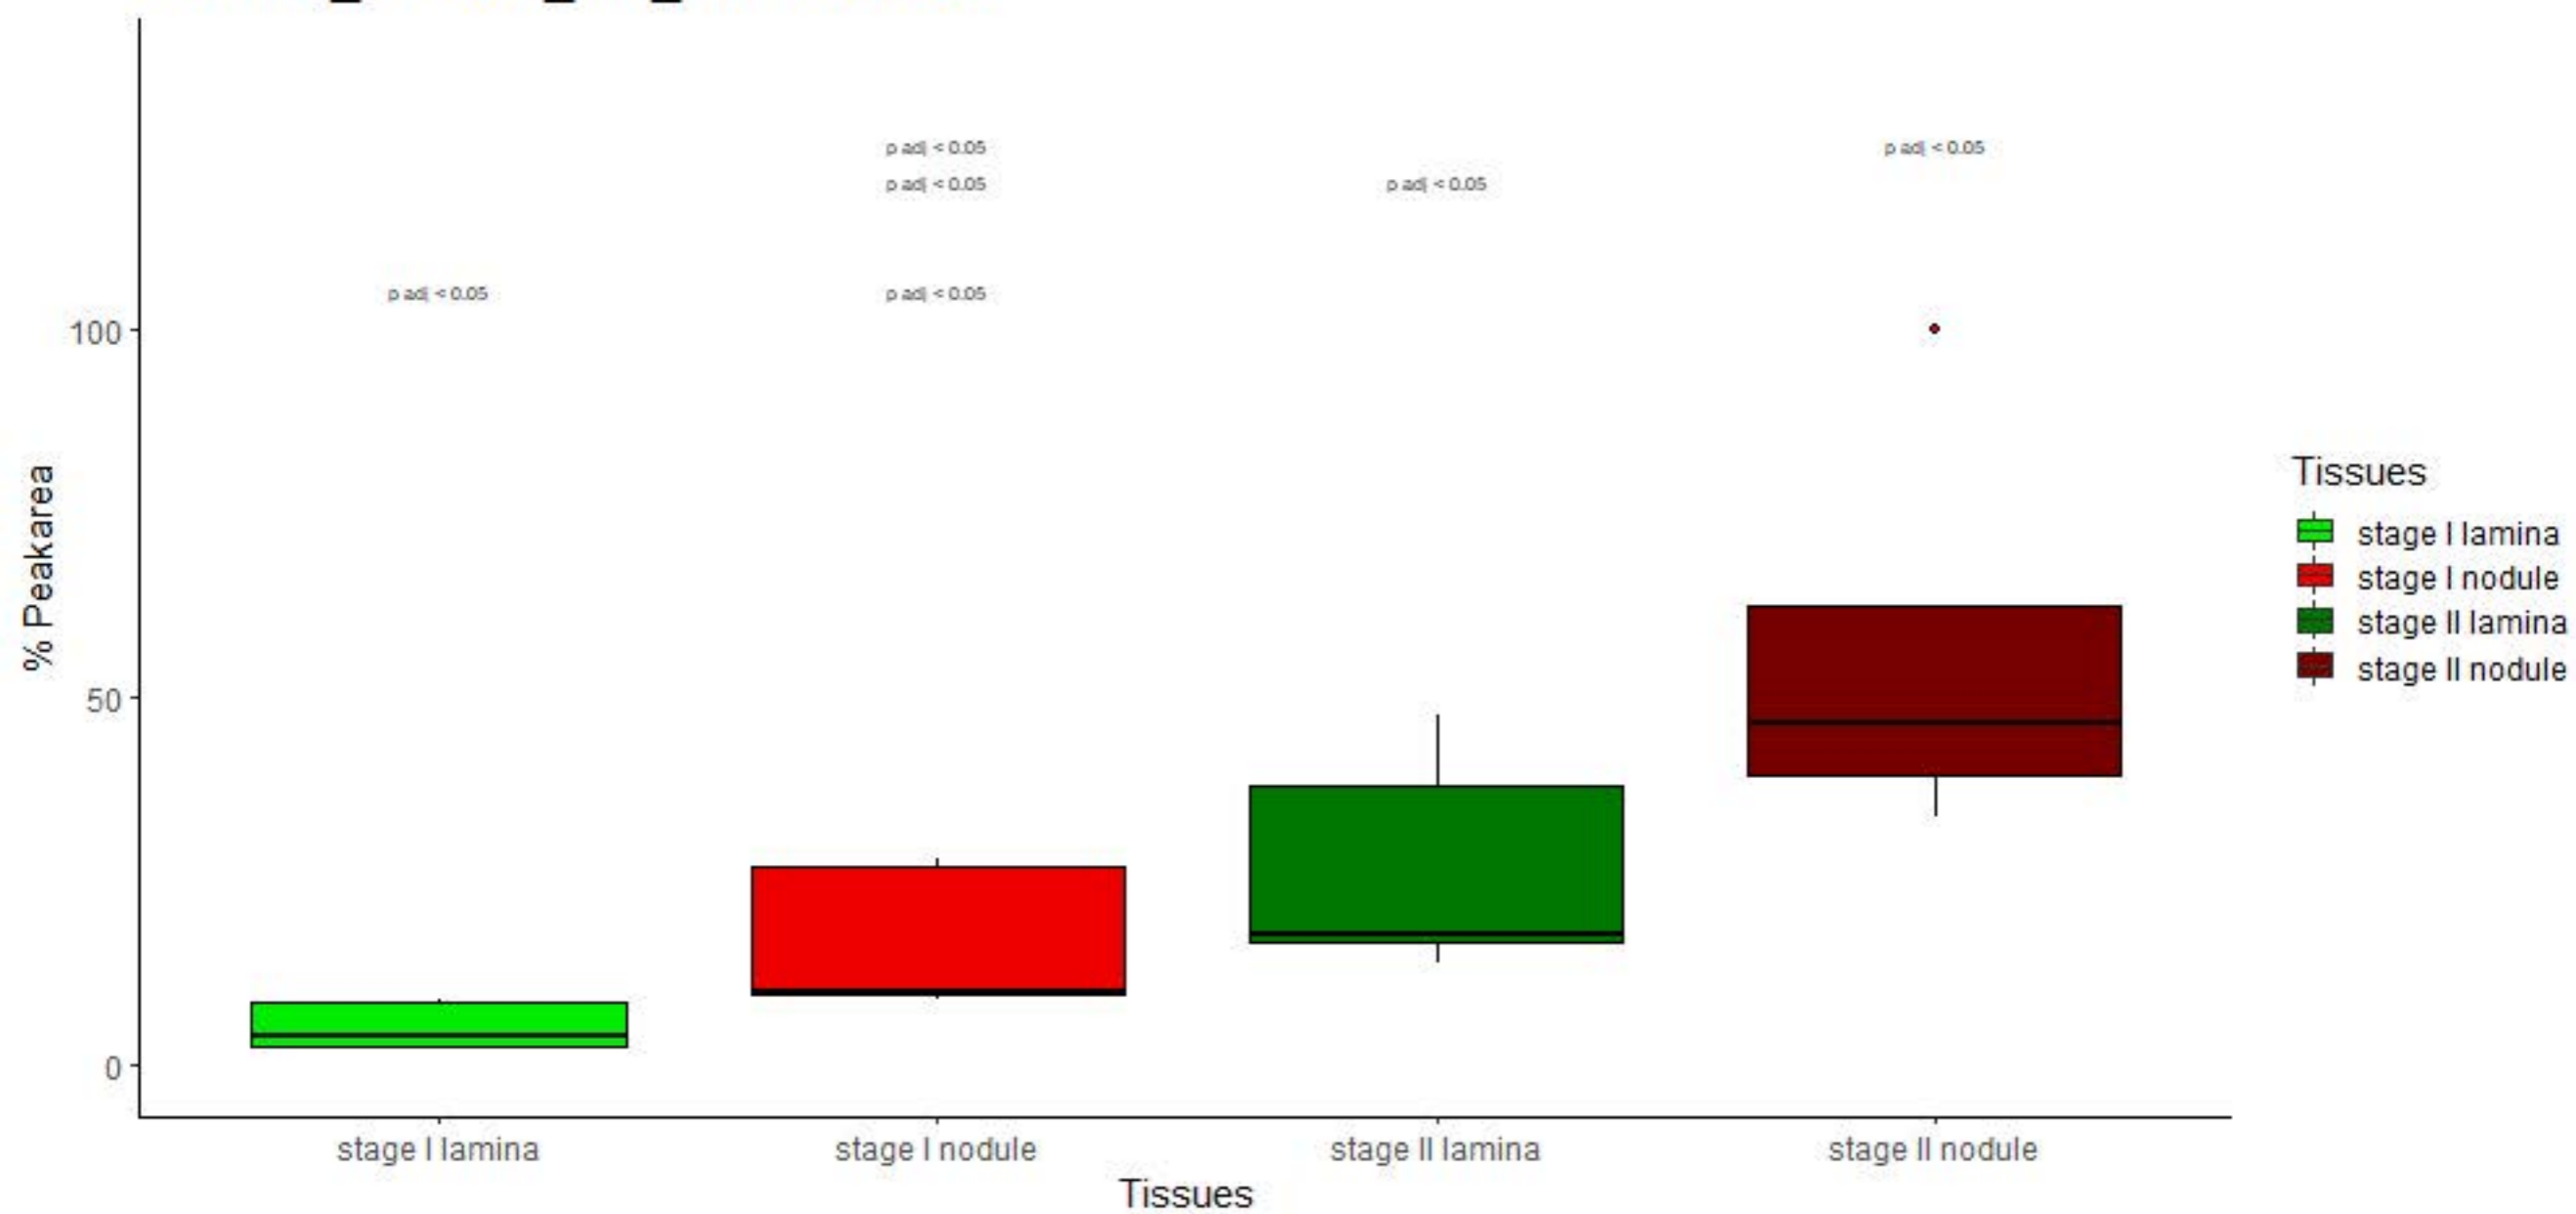

# N-Acetylserotonin\_RT:20.76\_min\_m/z:219.1128

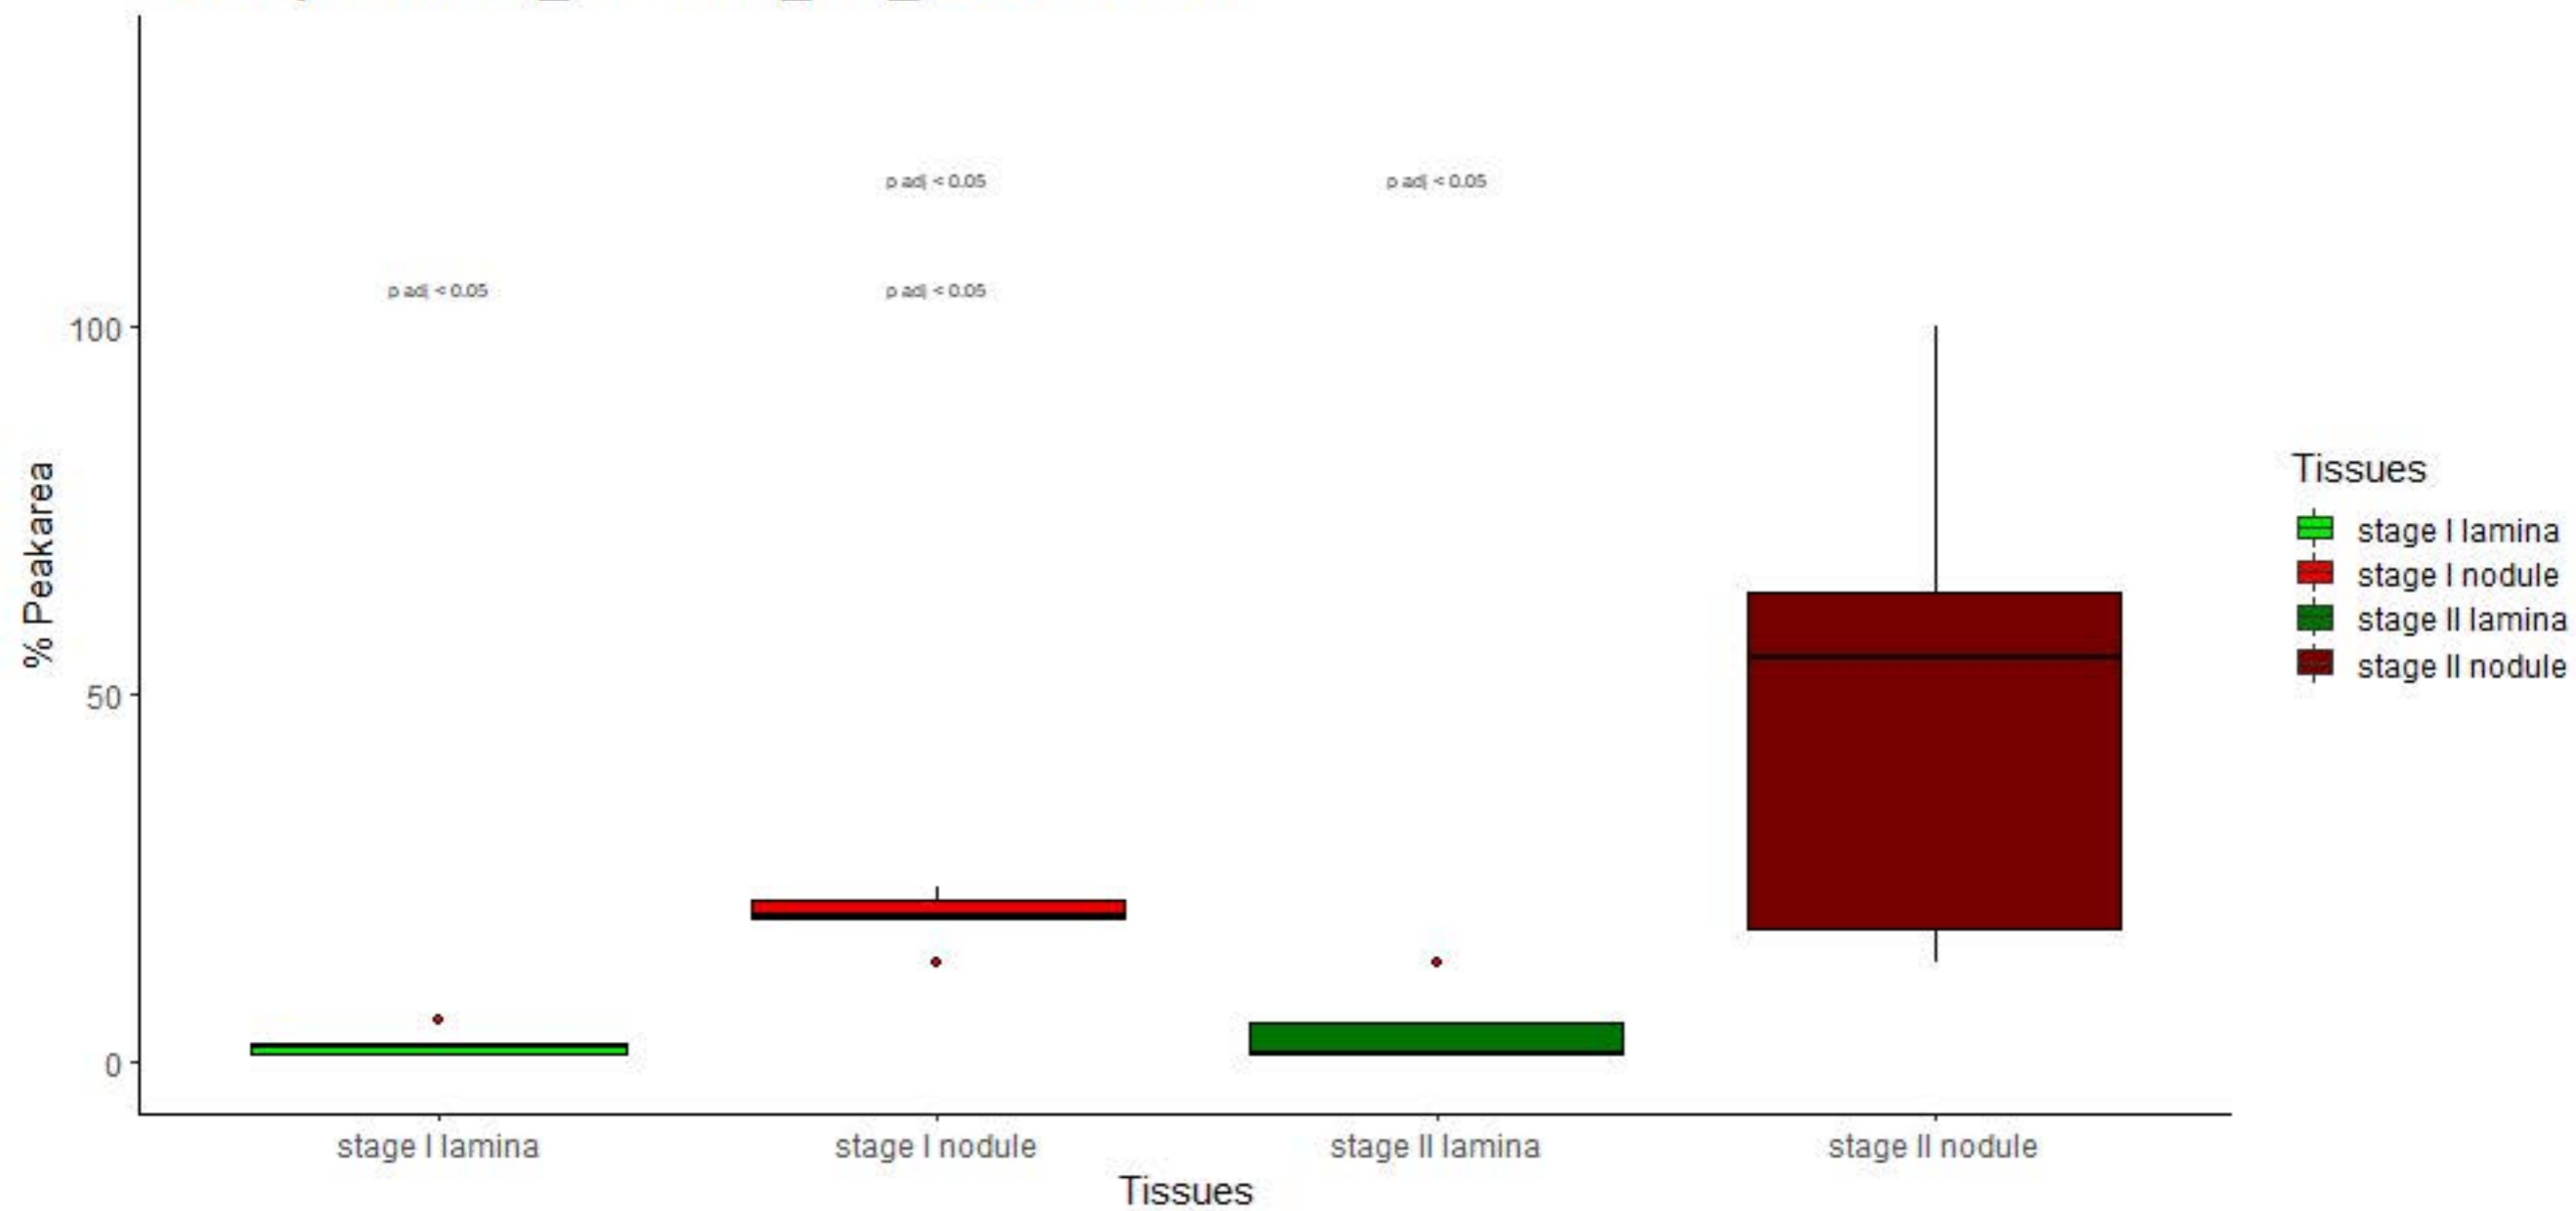

NAD+ \_RT:4.23\_min\_m/z:664.1164

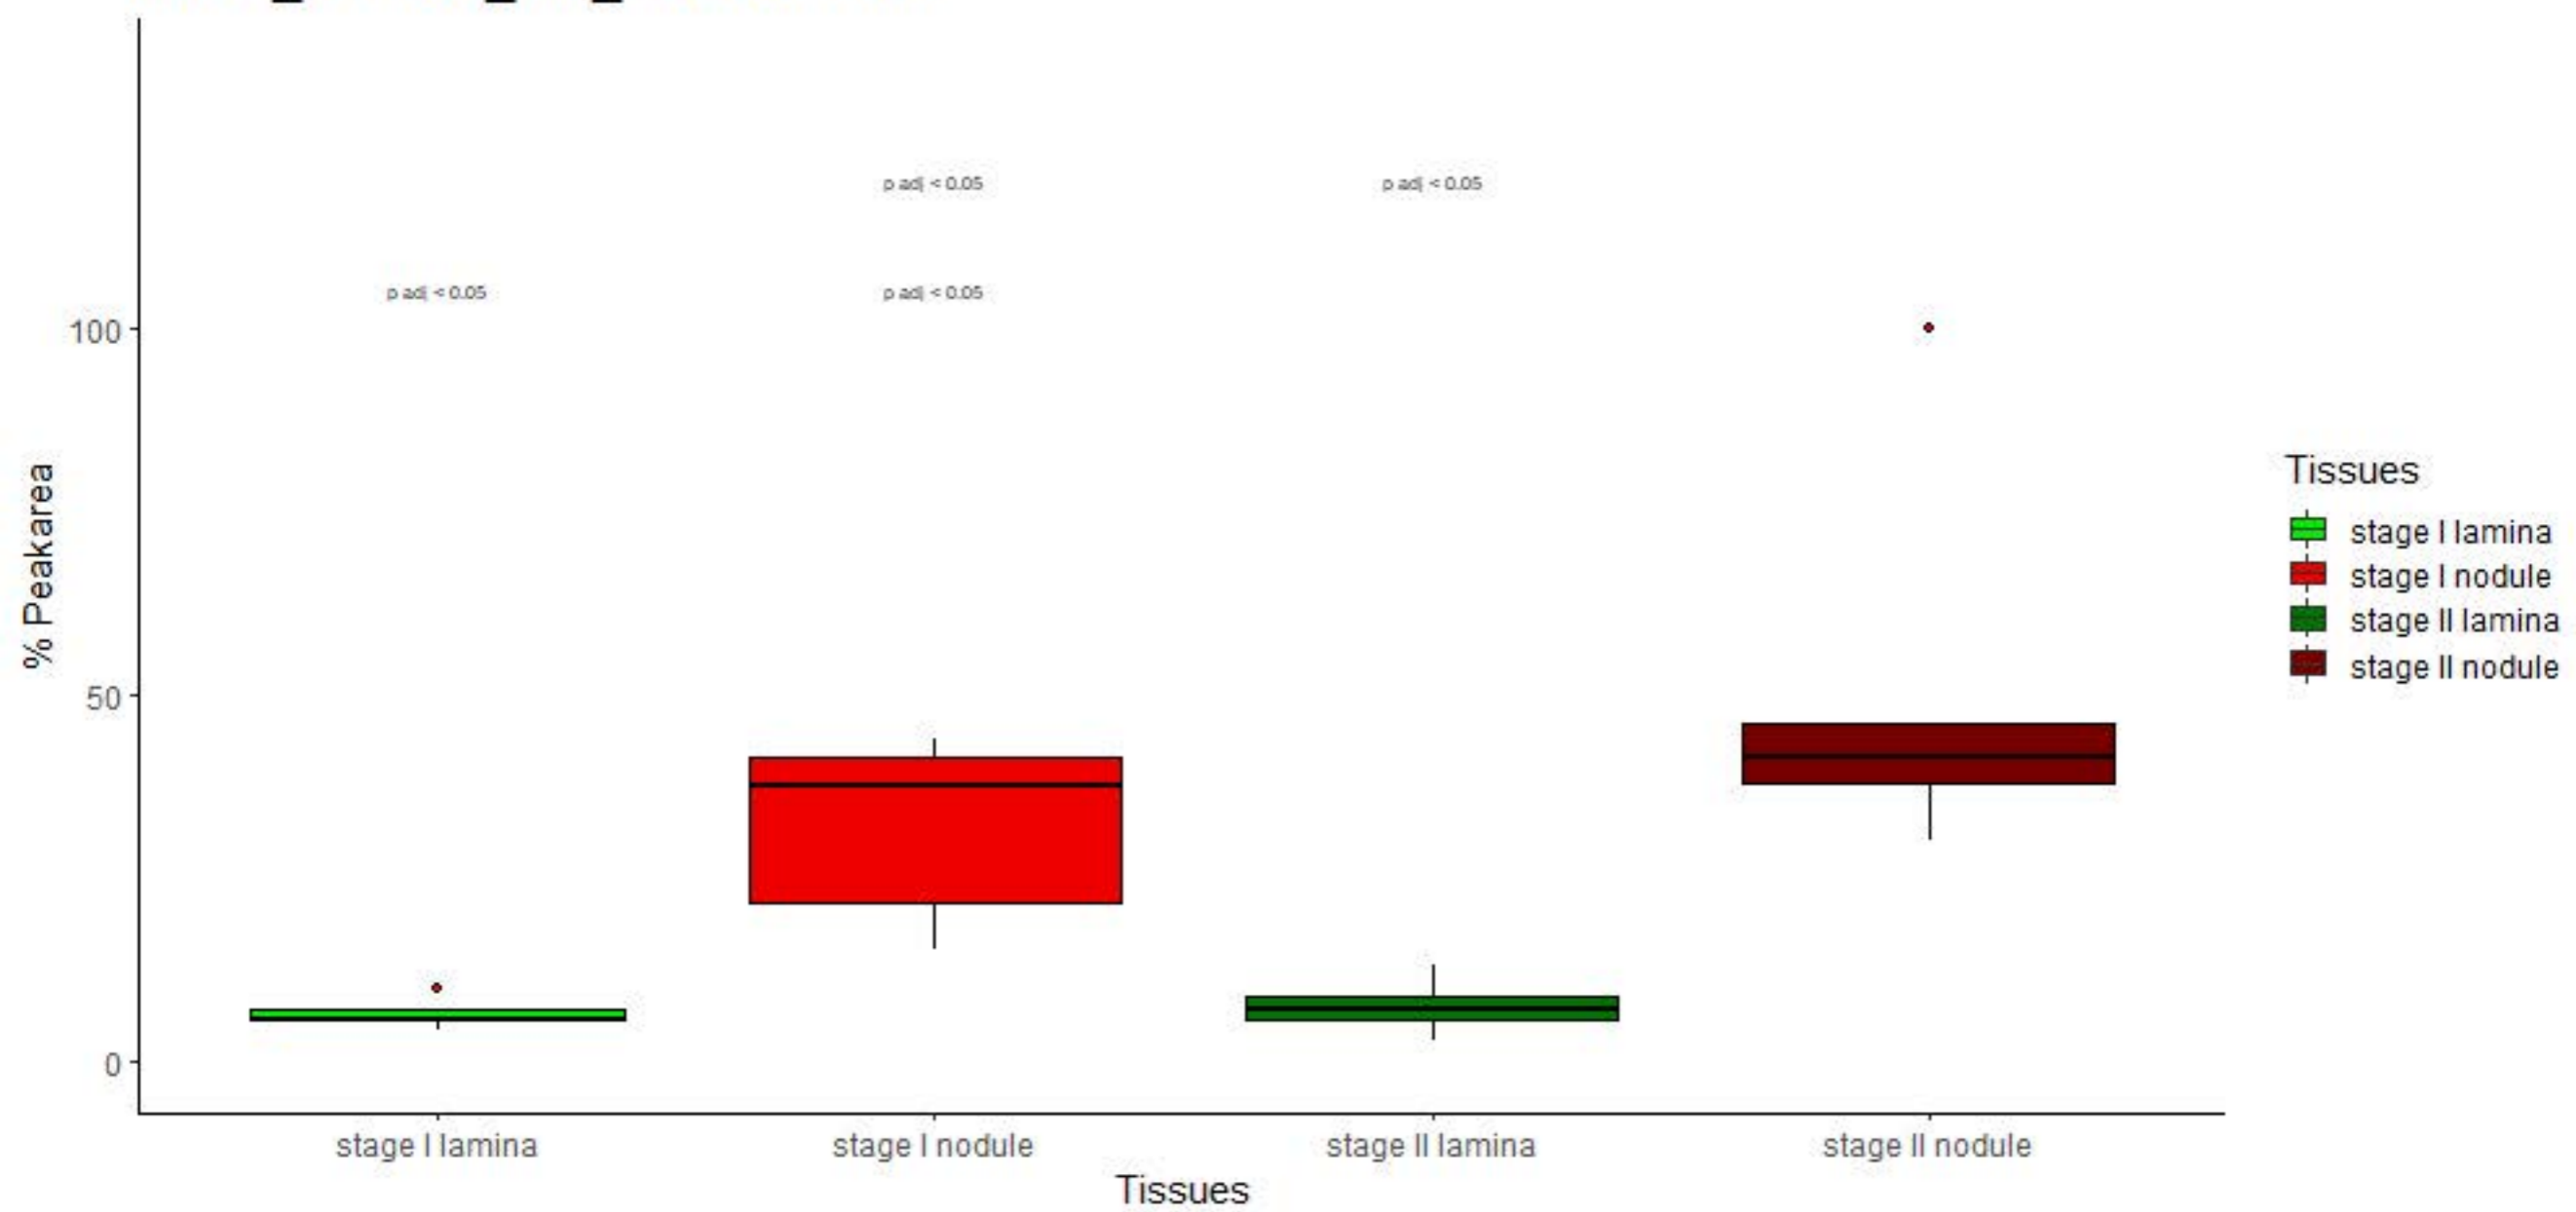

# Leukopterin\_RT:4.48\_min\_m/z:196.0465

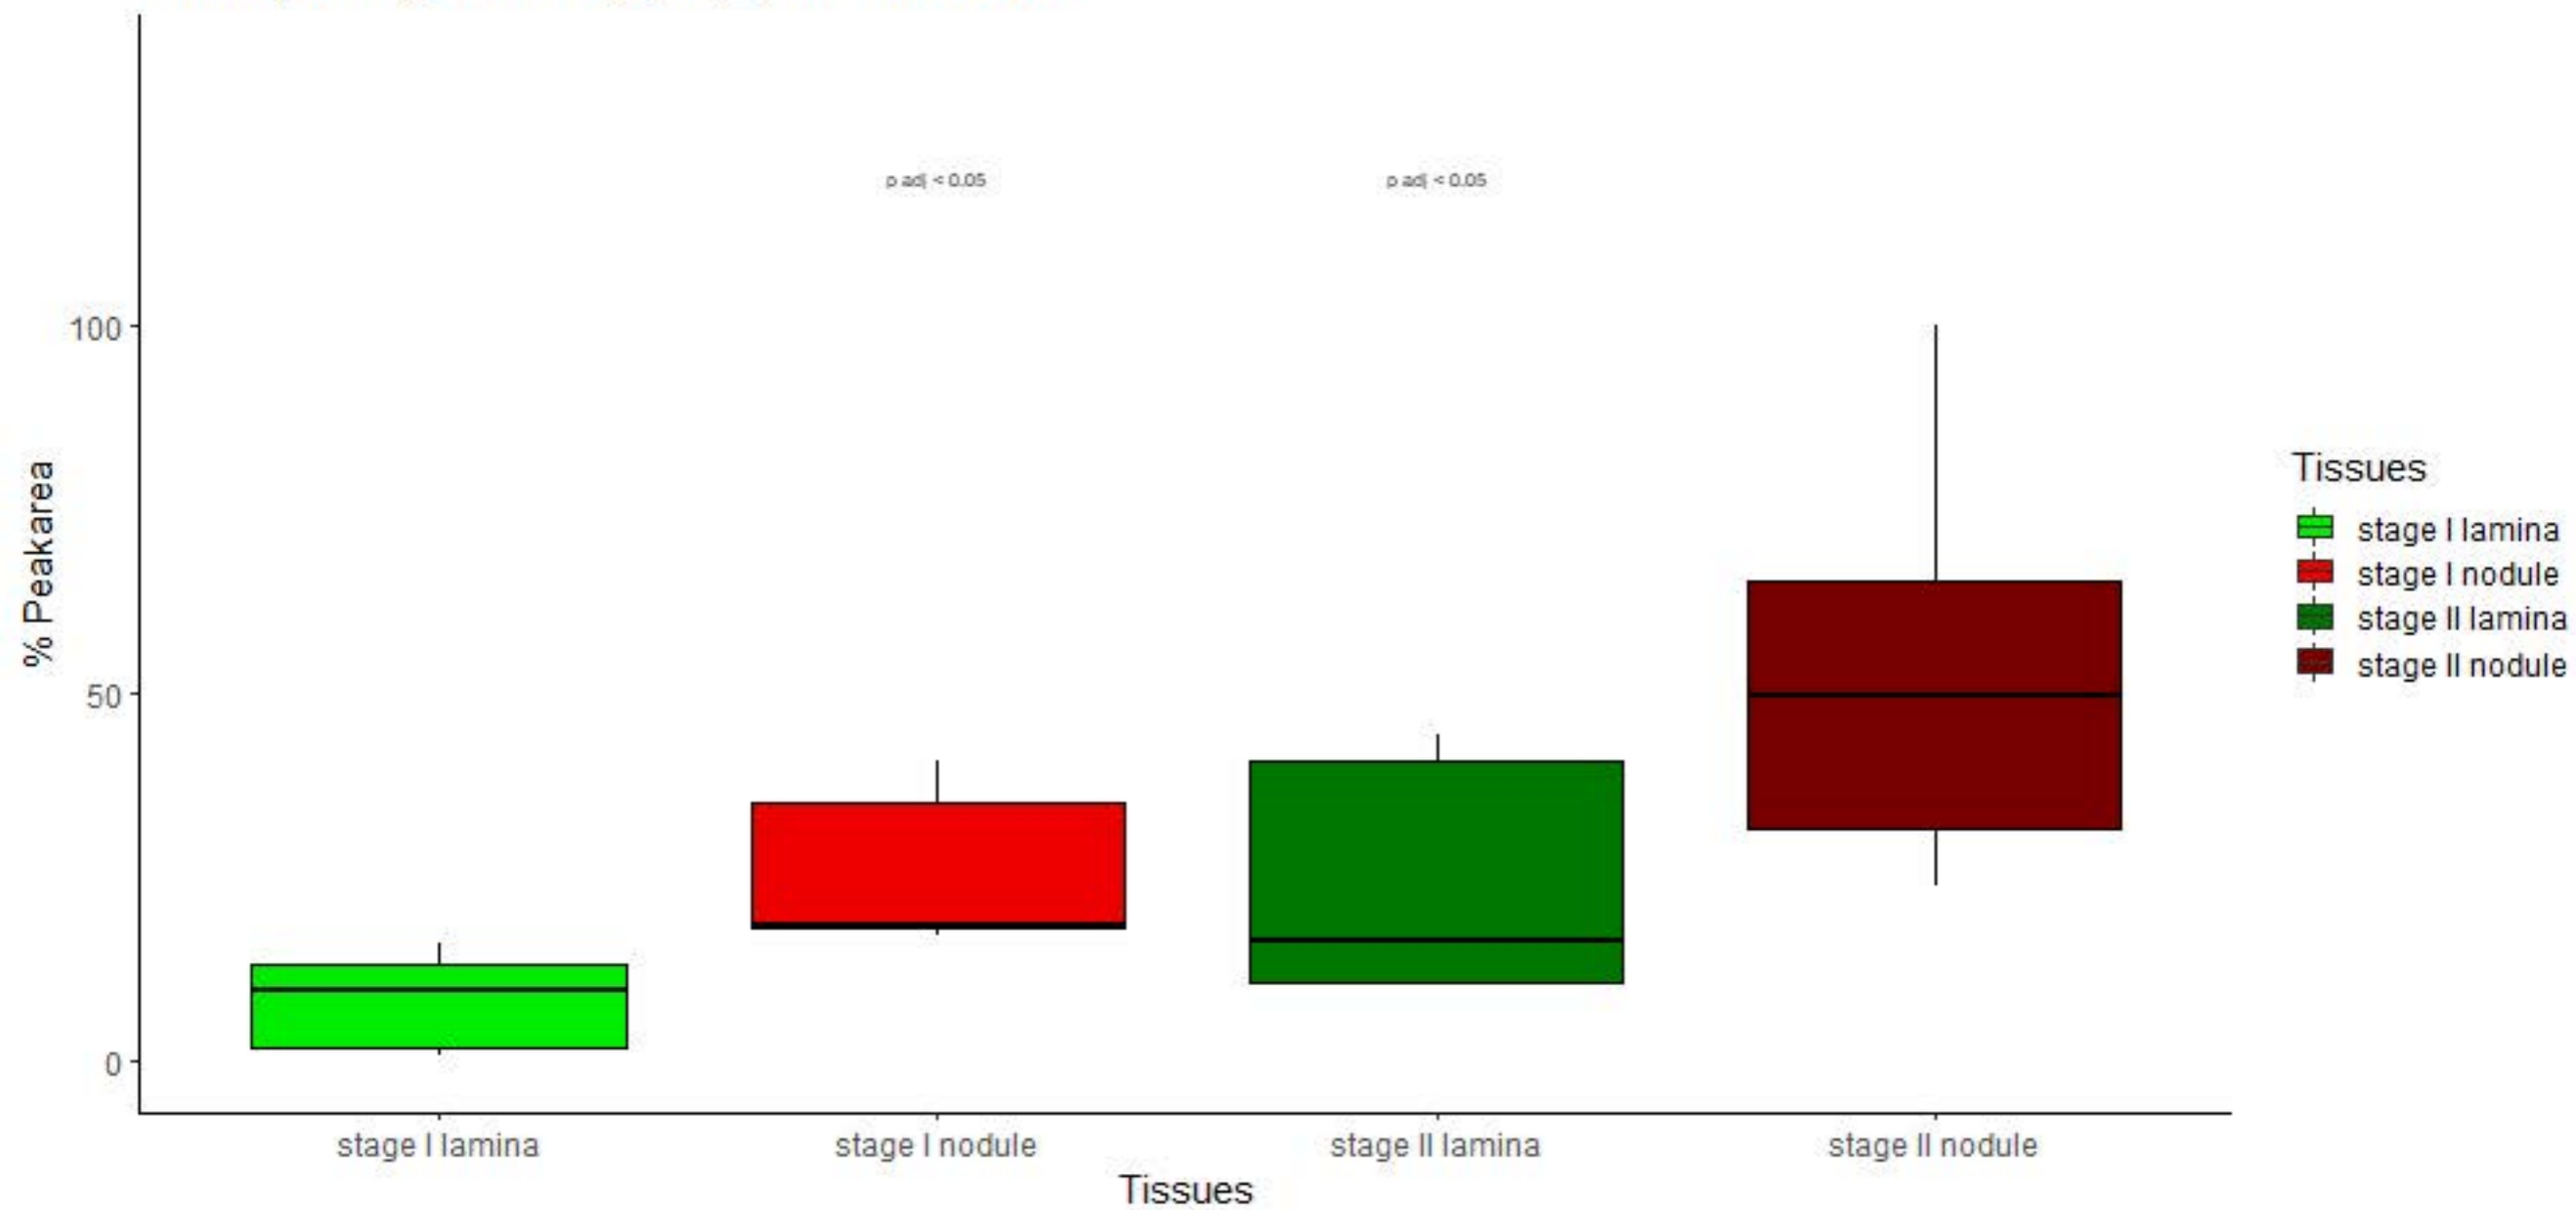

# N-Acetylmuramic\_acid\_RT:3.95\_min\_m/z:294.1183

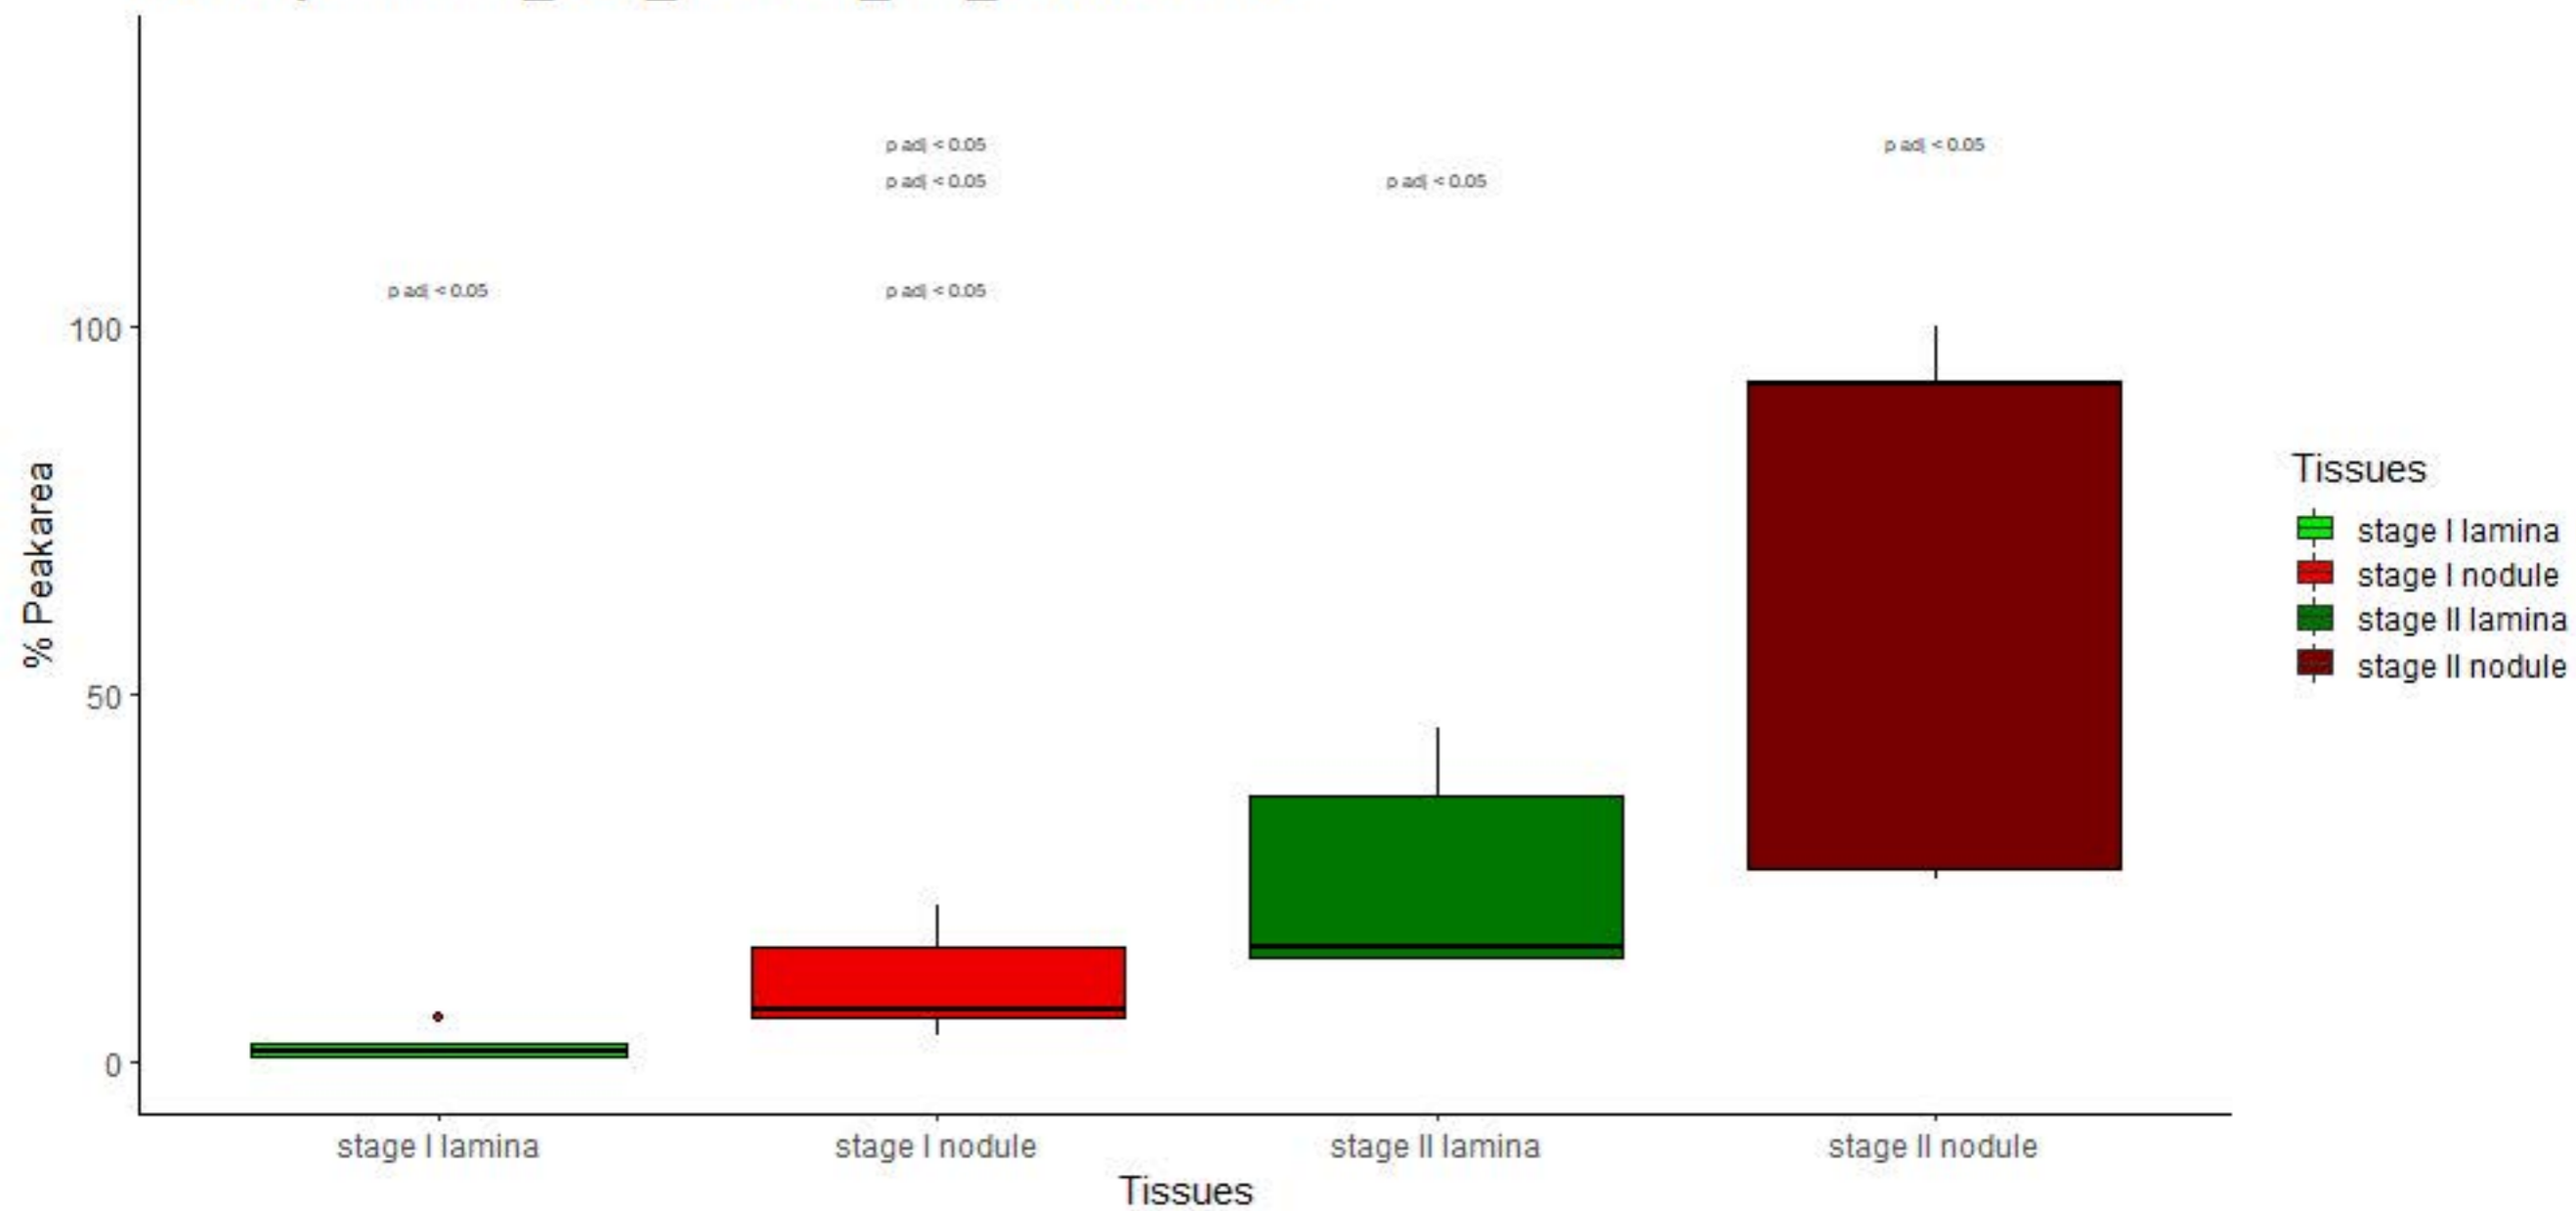

# N-Acetylmuramic\_acid\_RT:6.49\_min\_m/z:294.1183

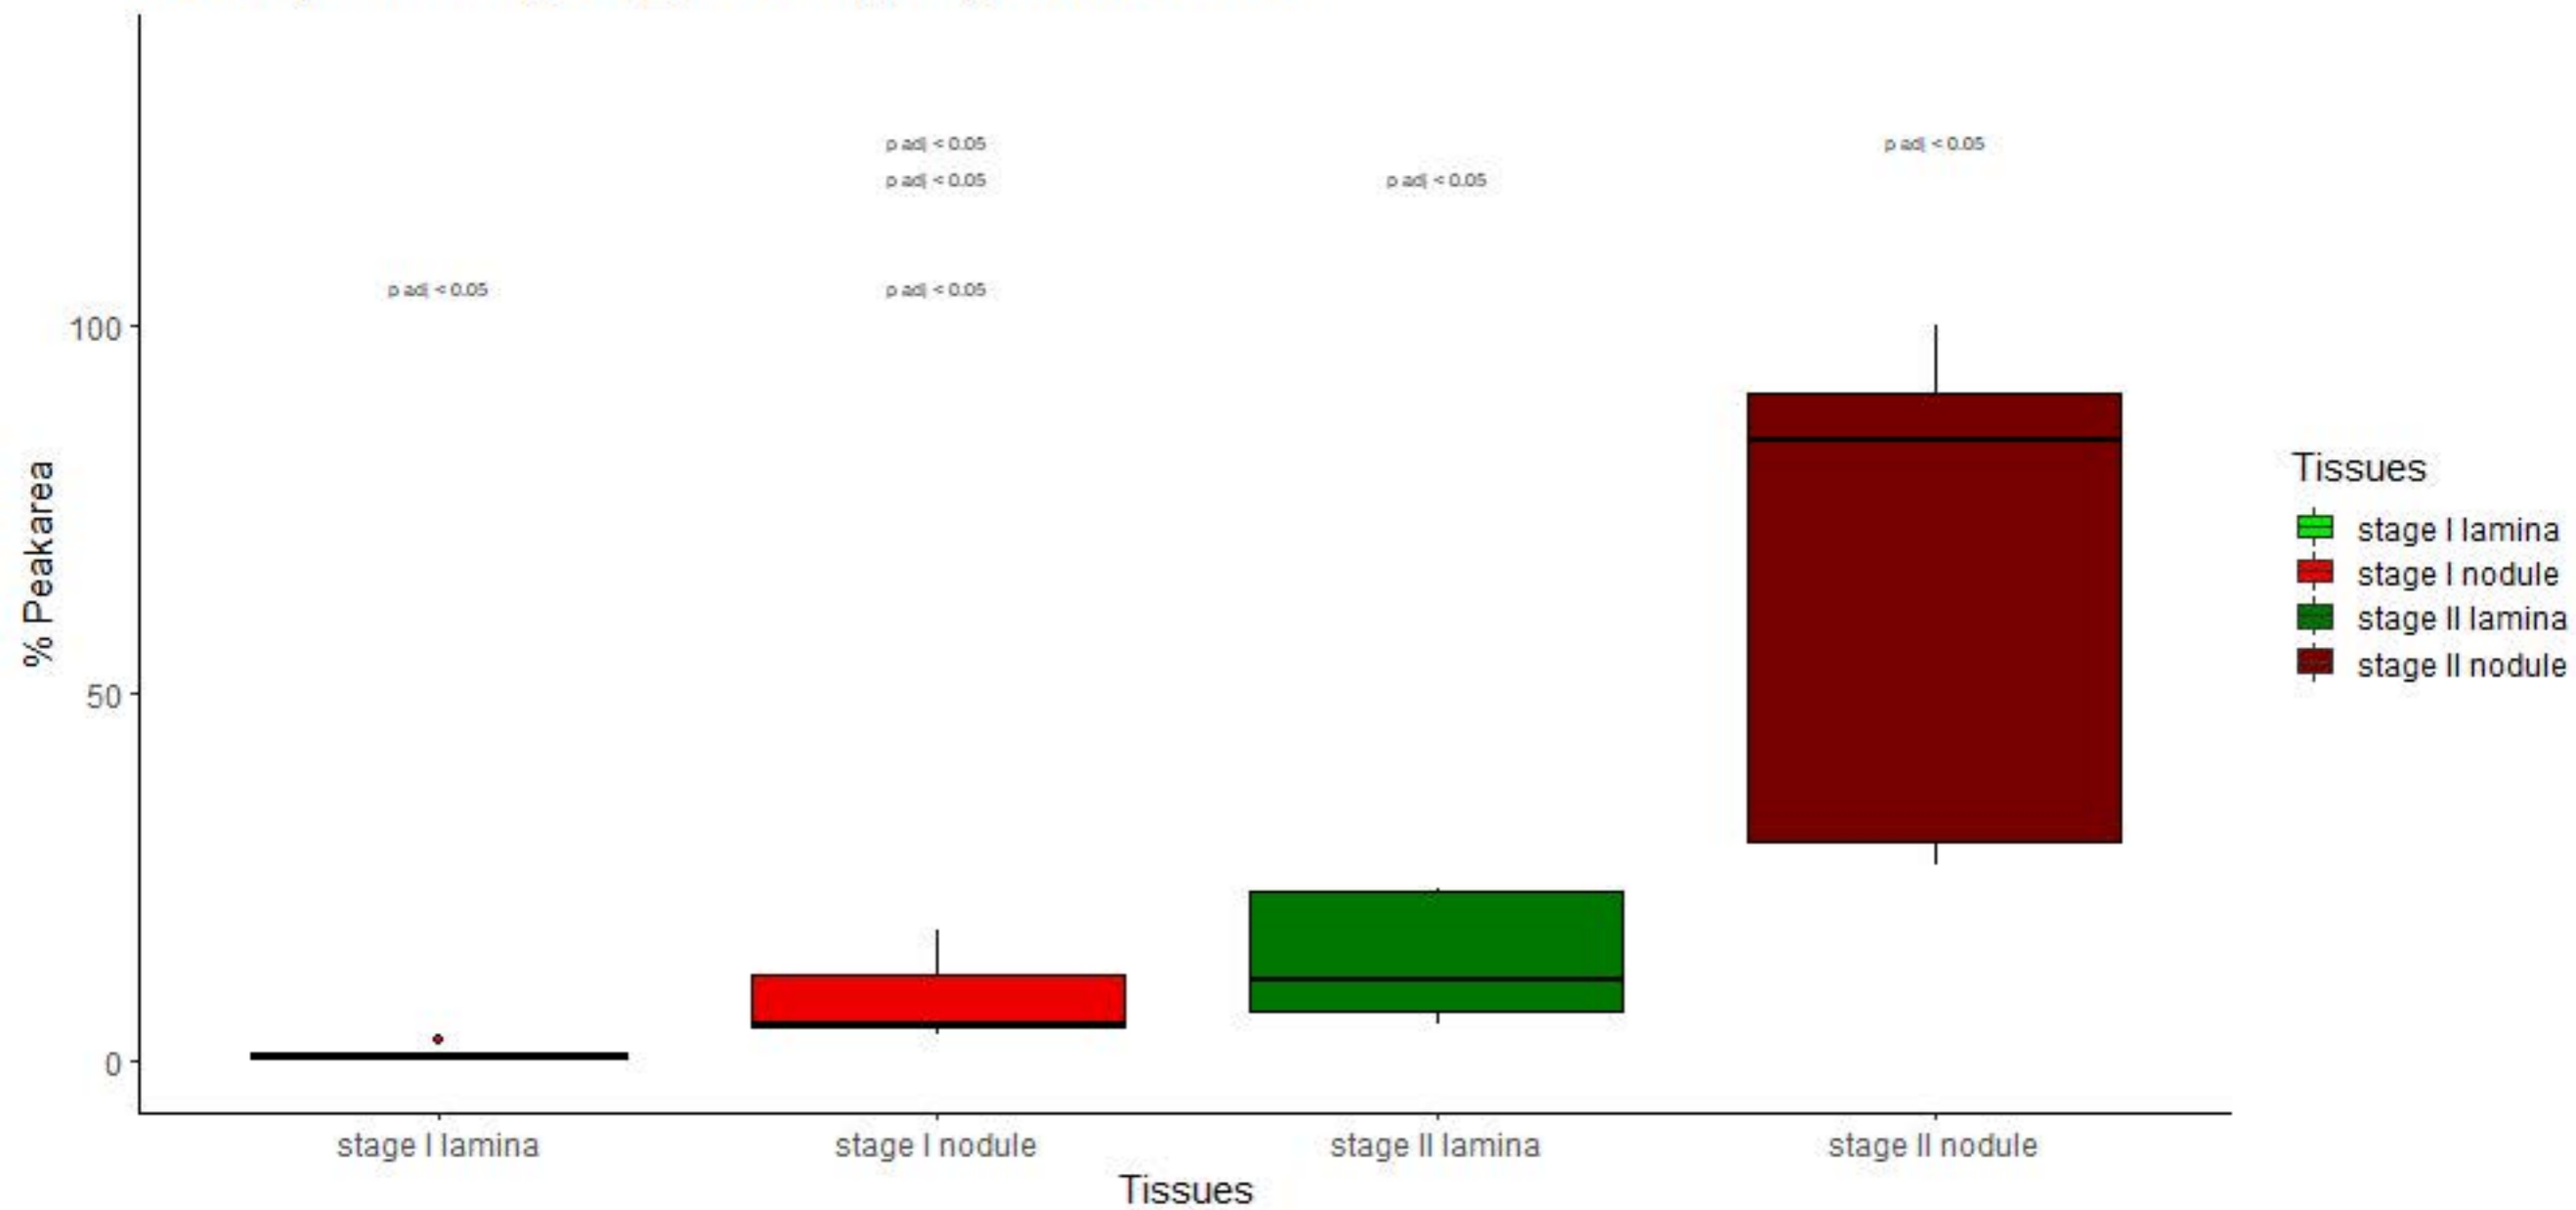



# Adenosine\_RT:8.09\_min\_m/z:268.1040

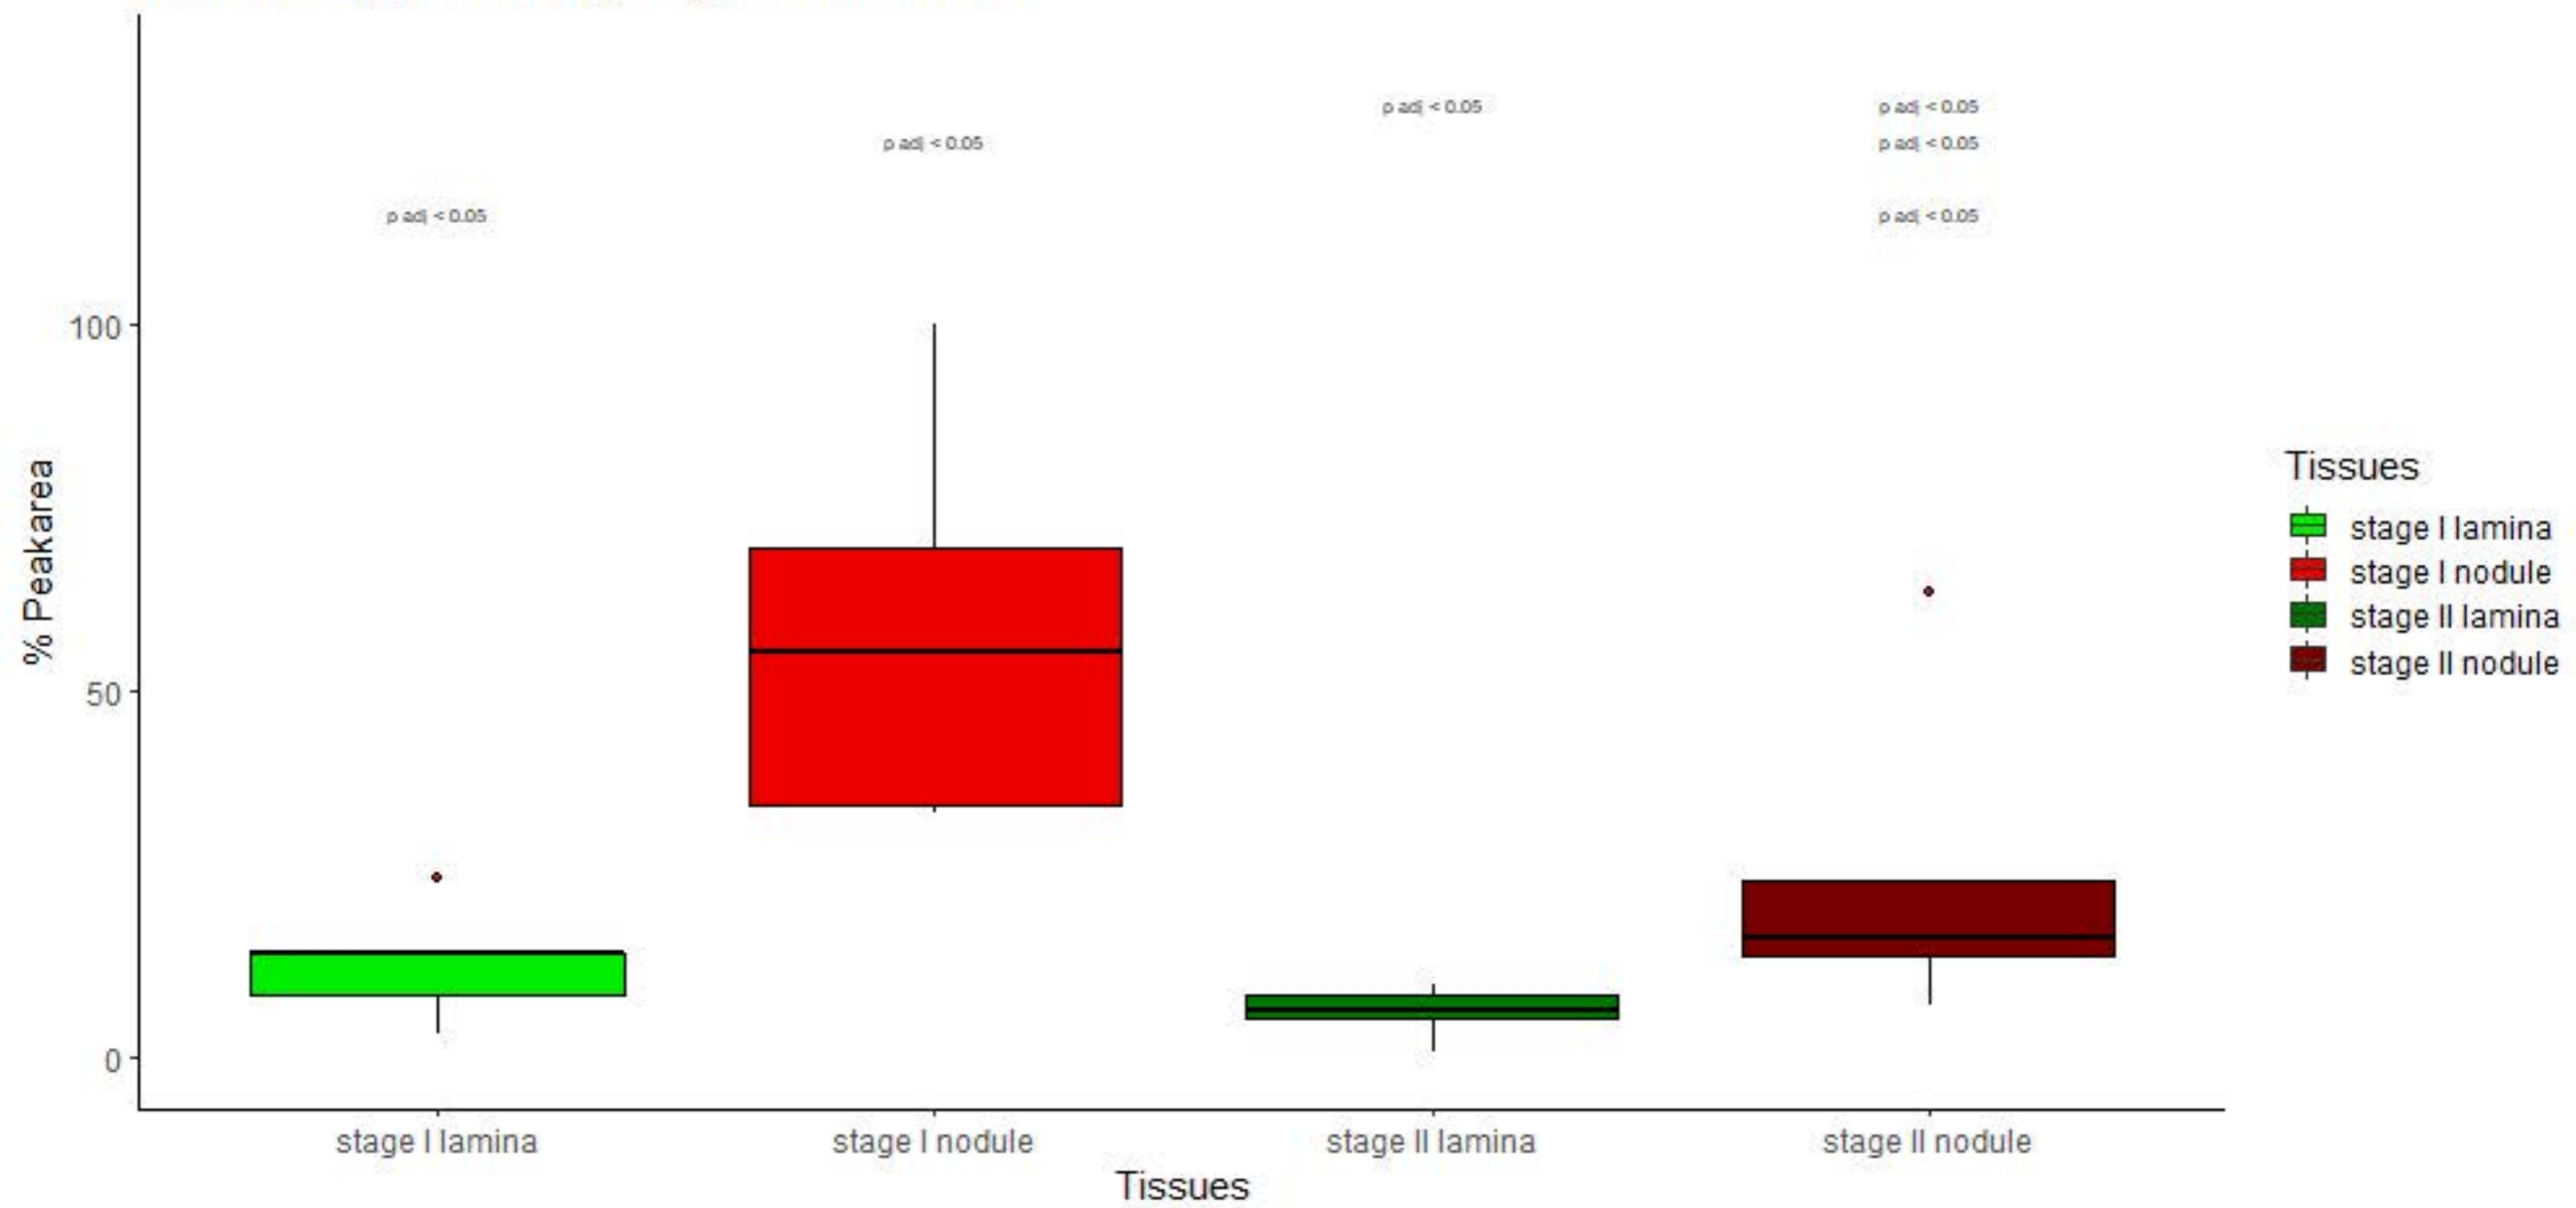

# Adenosine\_monophosphate\_RT:3.30\_min\_m/z:348.0704

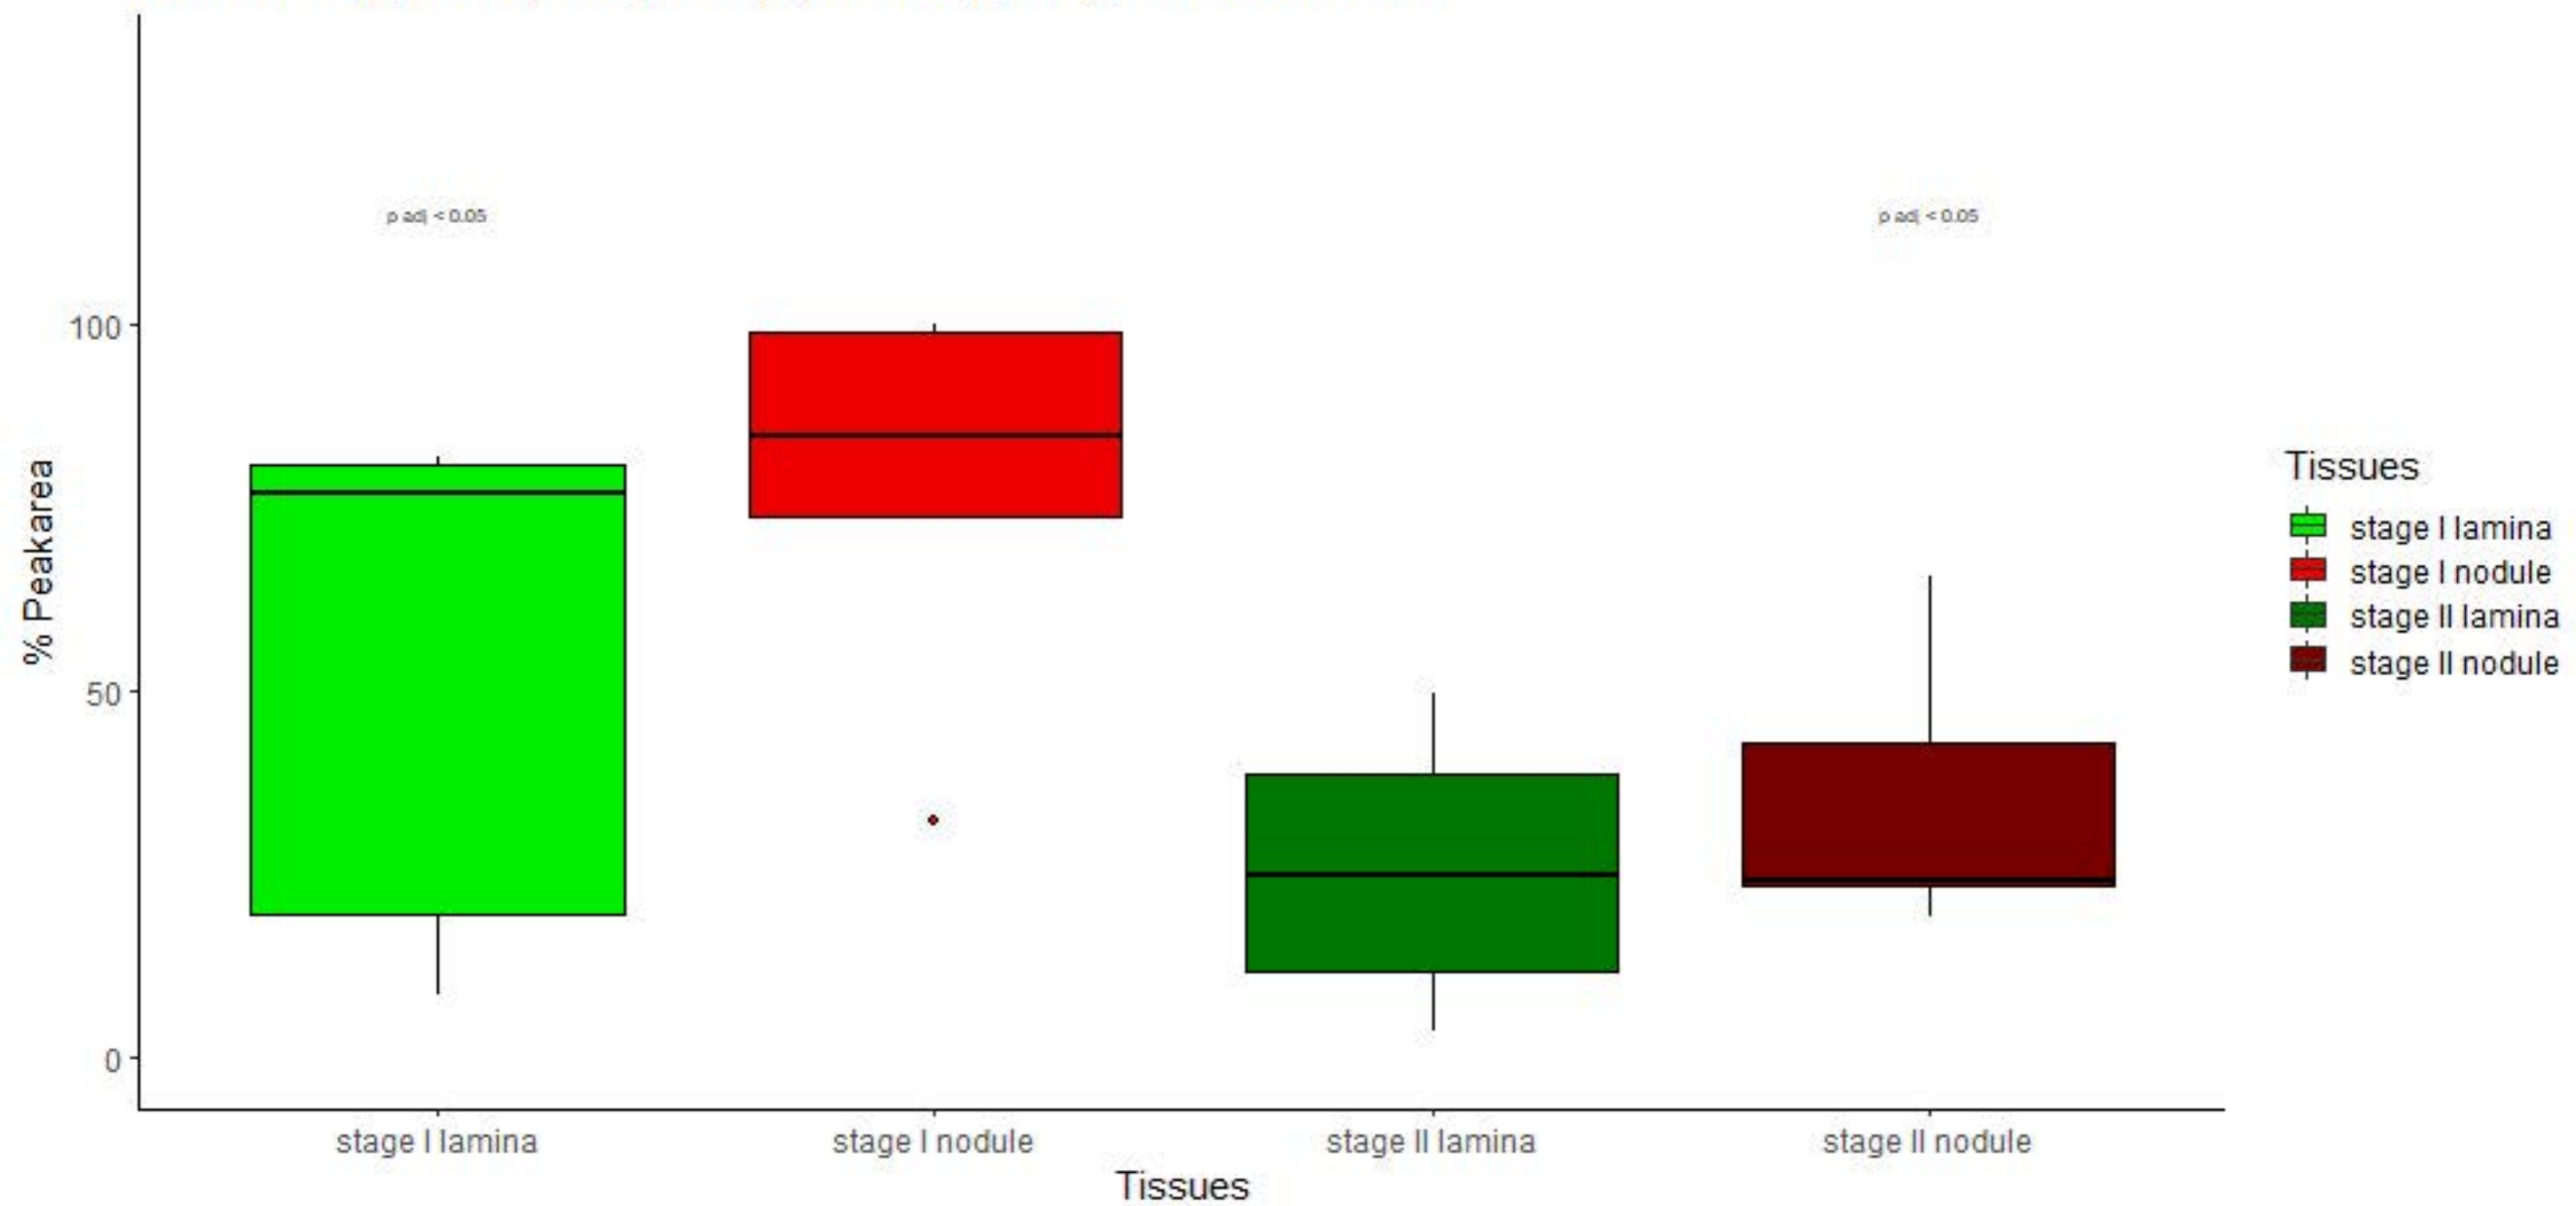

# Cyclic\_ADP\_Ribose\_RT:4.23\_min\_m/z:542.0680

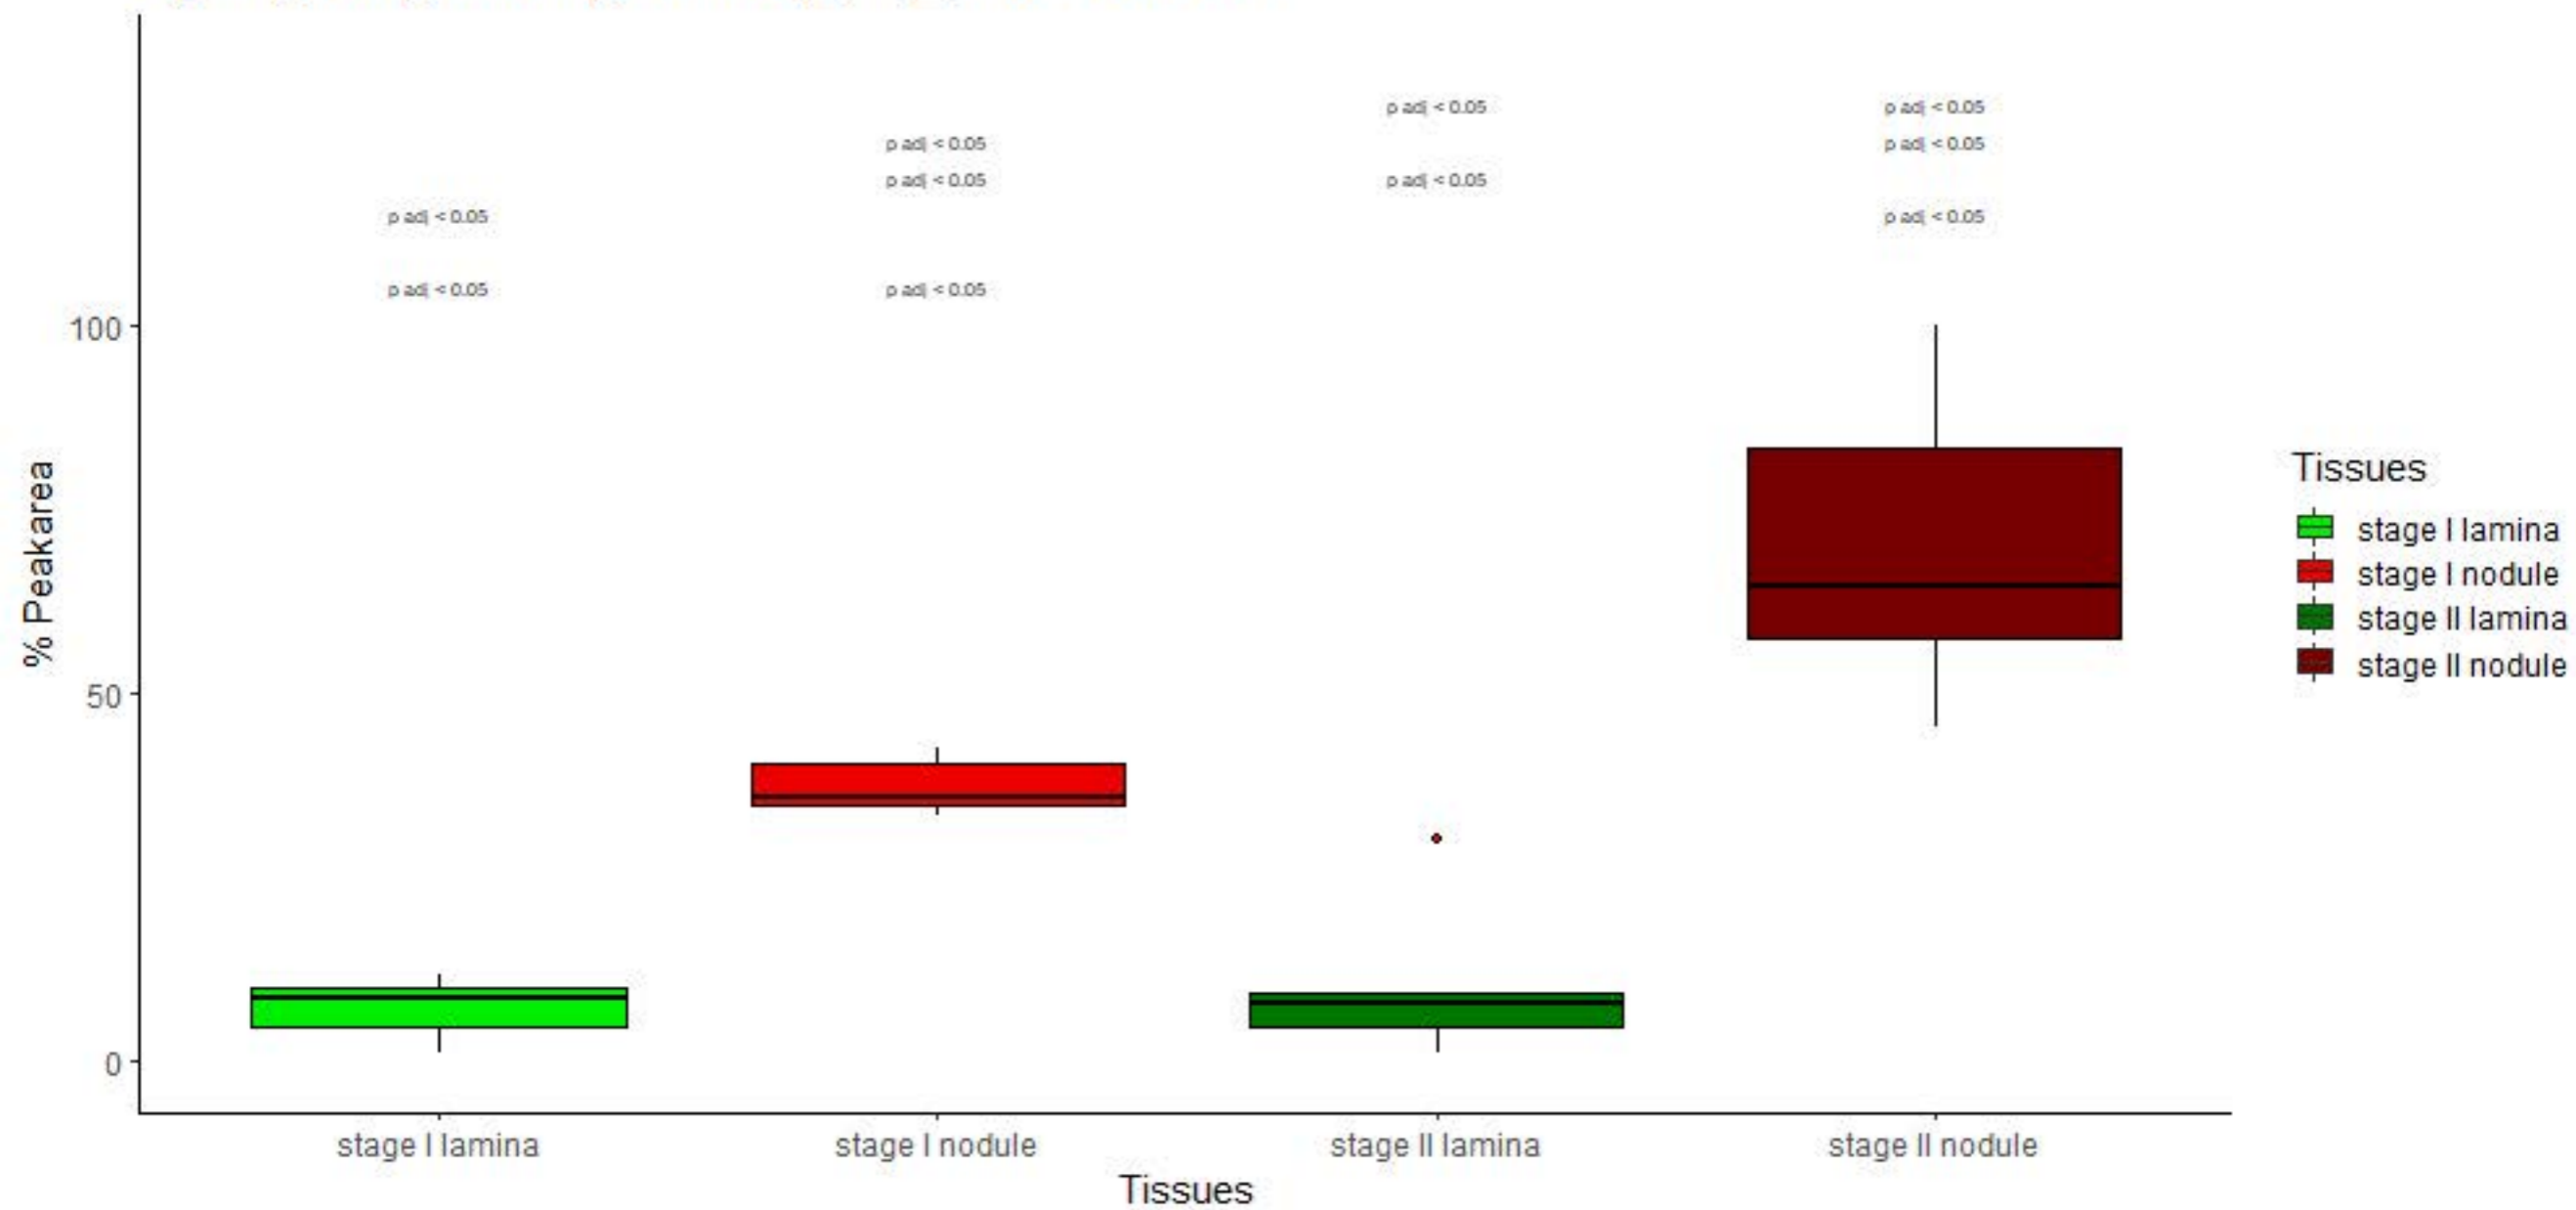

# S-methyl-5'-thioadenosine\_RT:15.96\_min\_m/z:298.0968

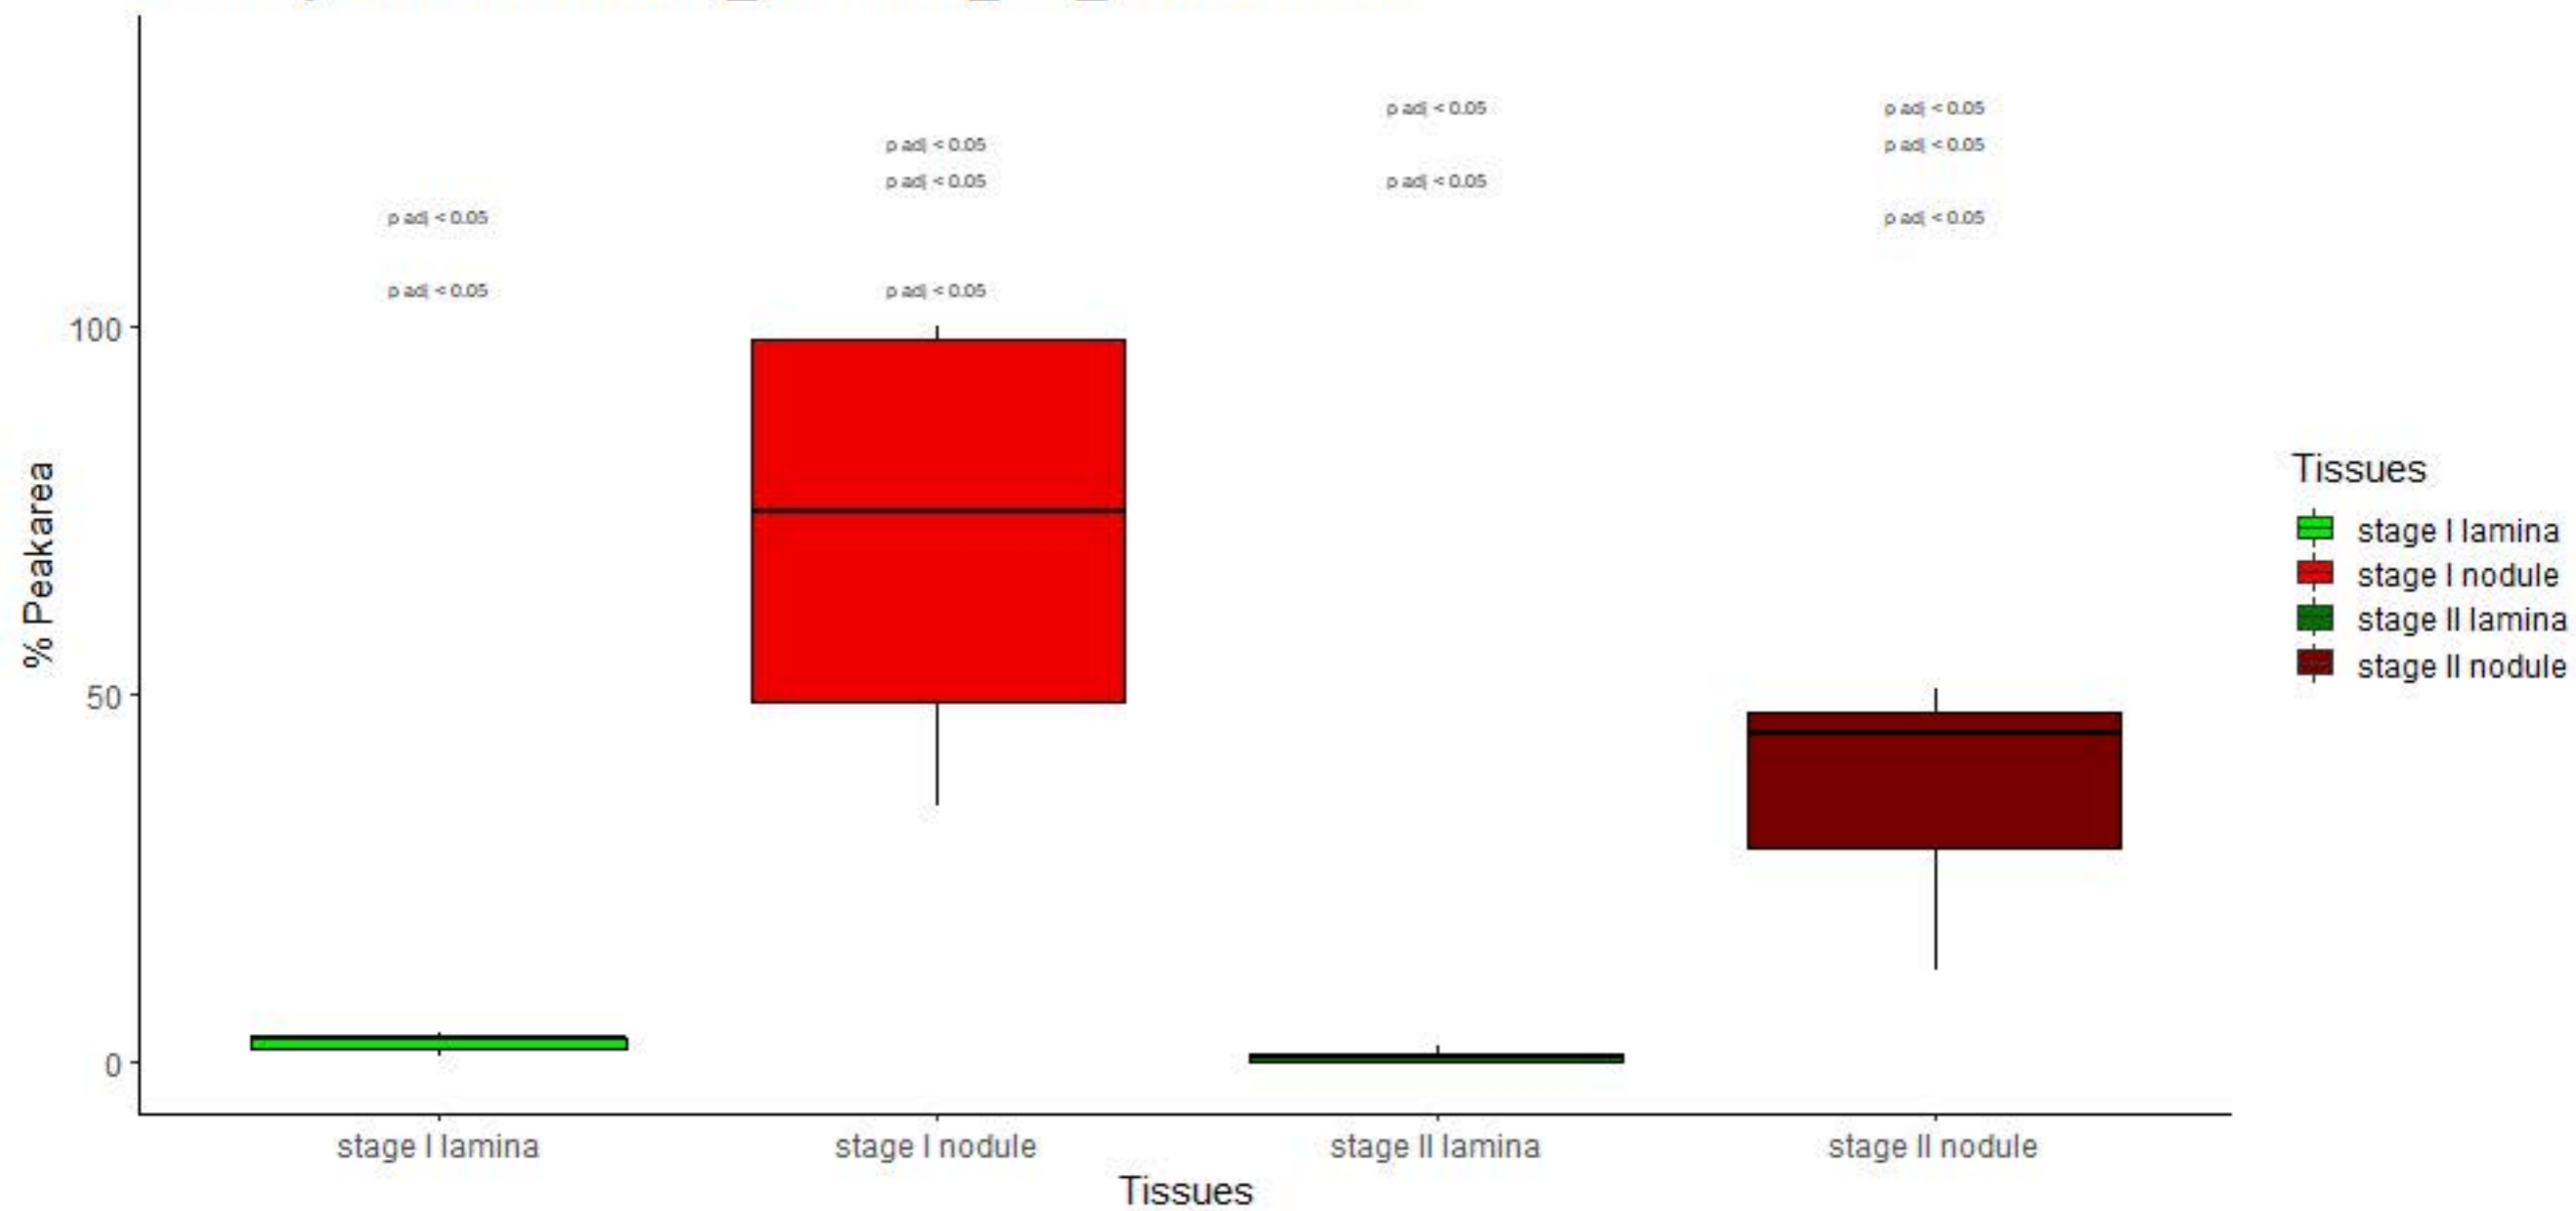

# S-methyl-5'-thioadenosine\_RT:3.14\_min\_m/z:298.0968

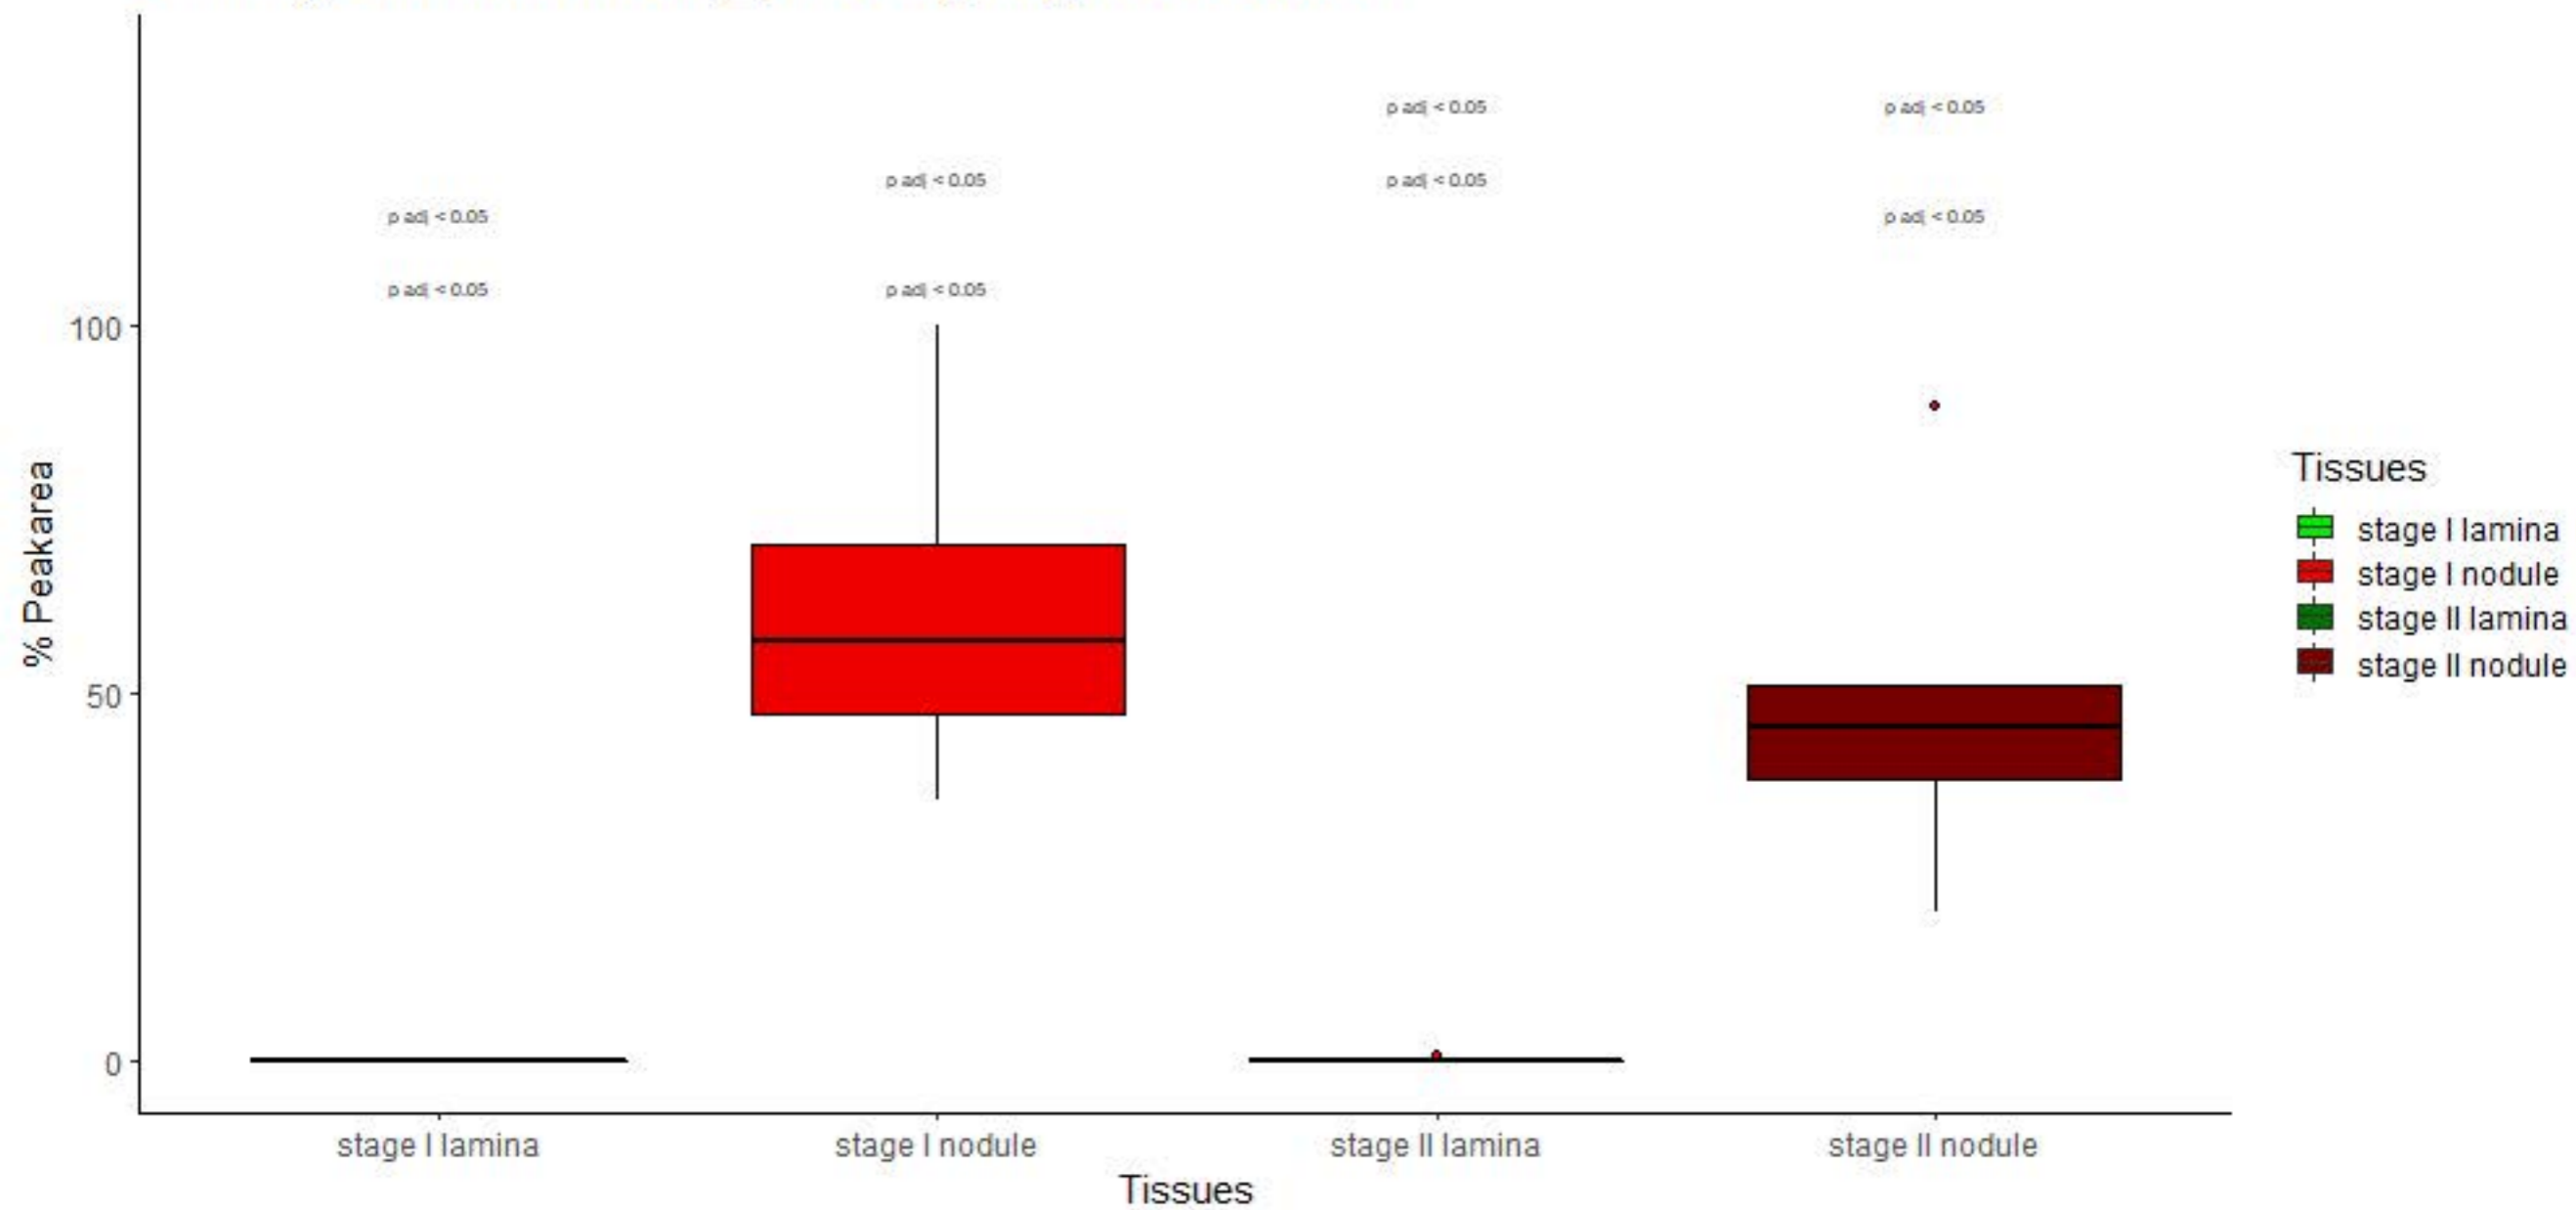

# Guanosine\_RT:9.92\_min\_m/z:284.0989

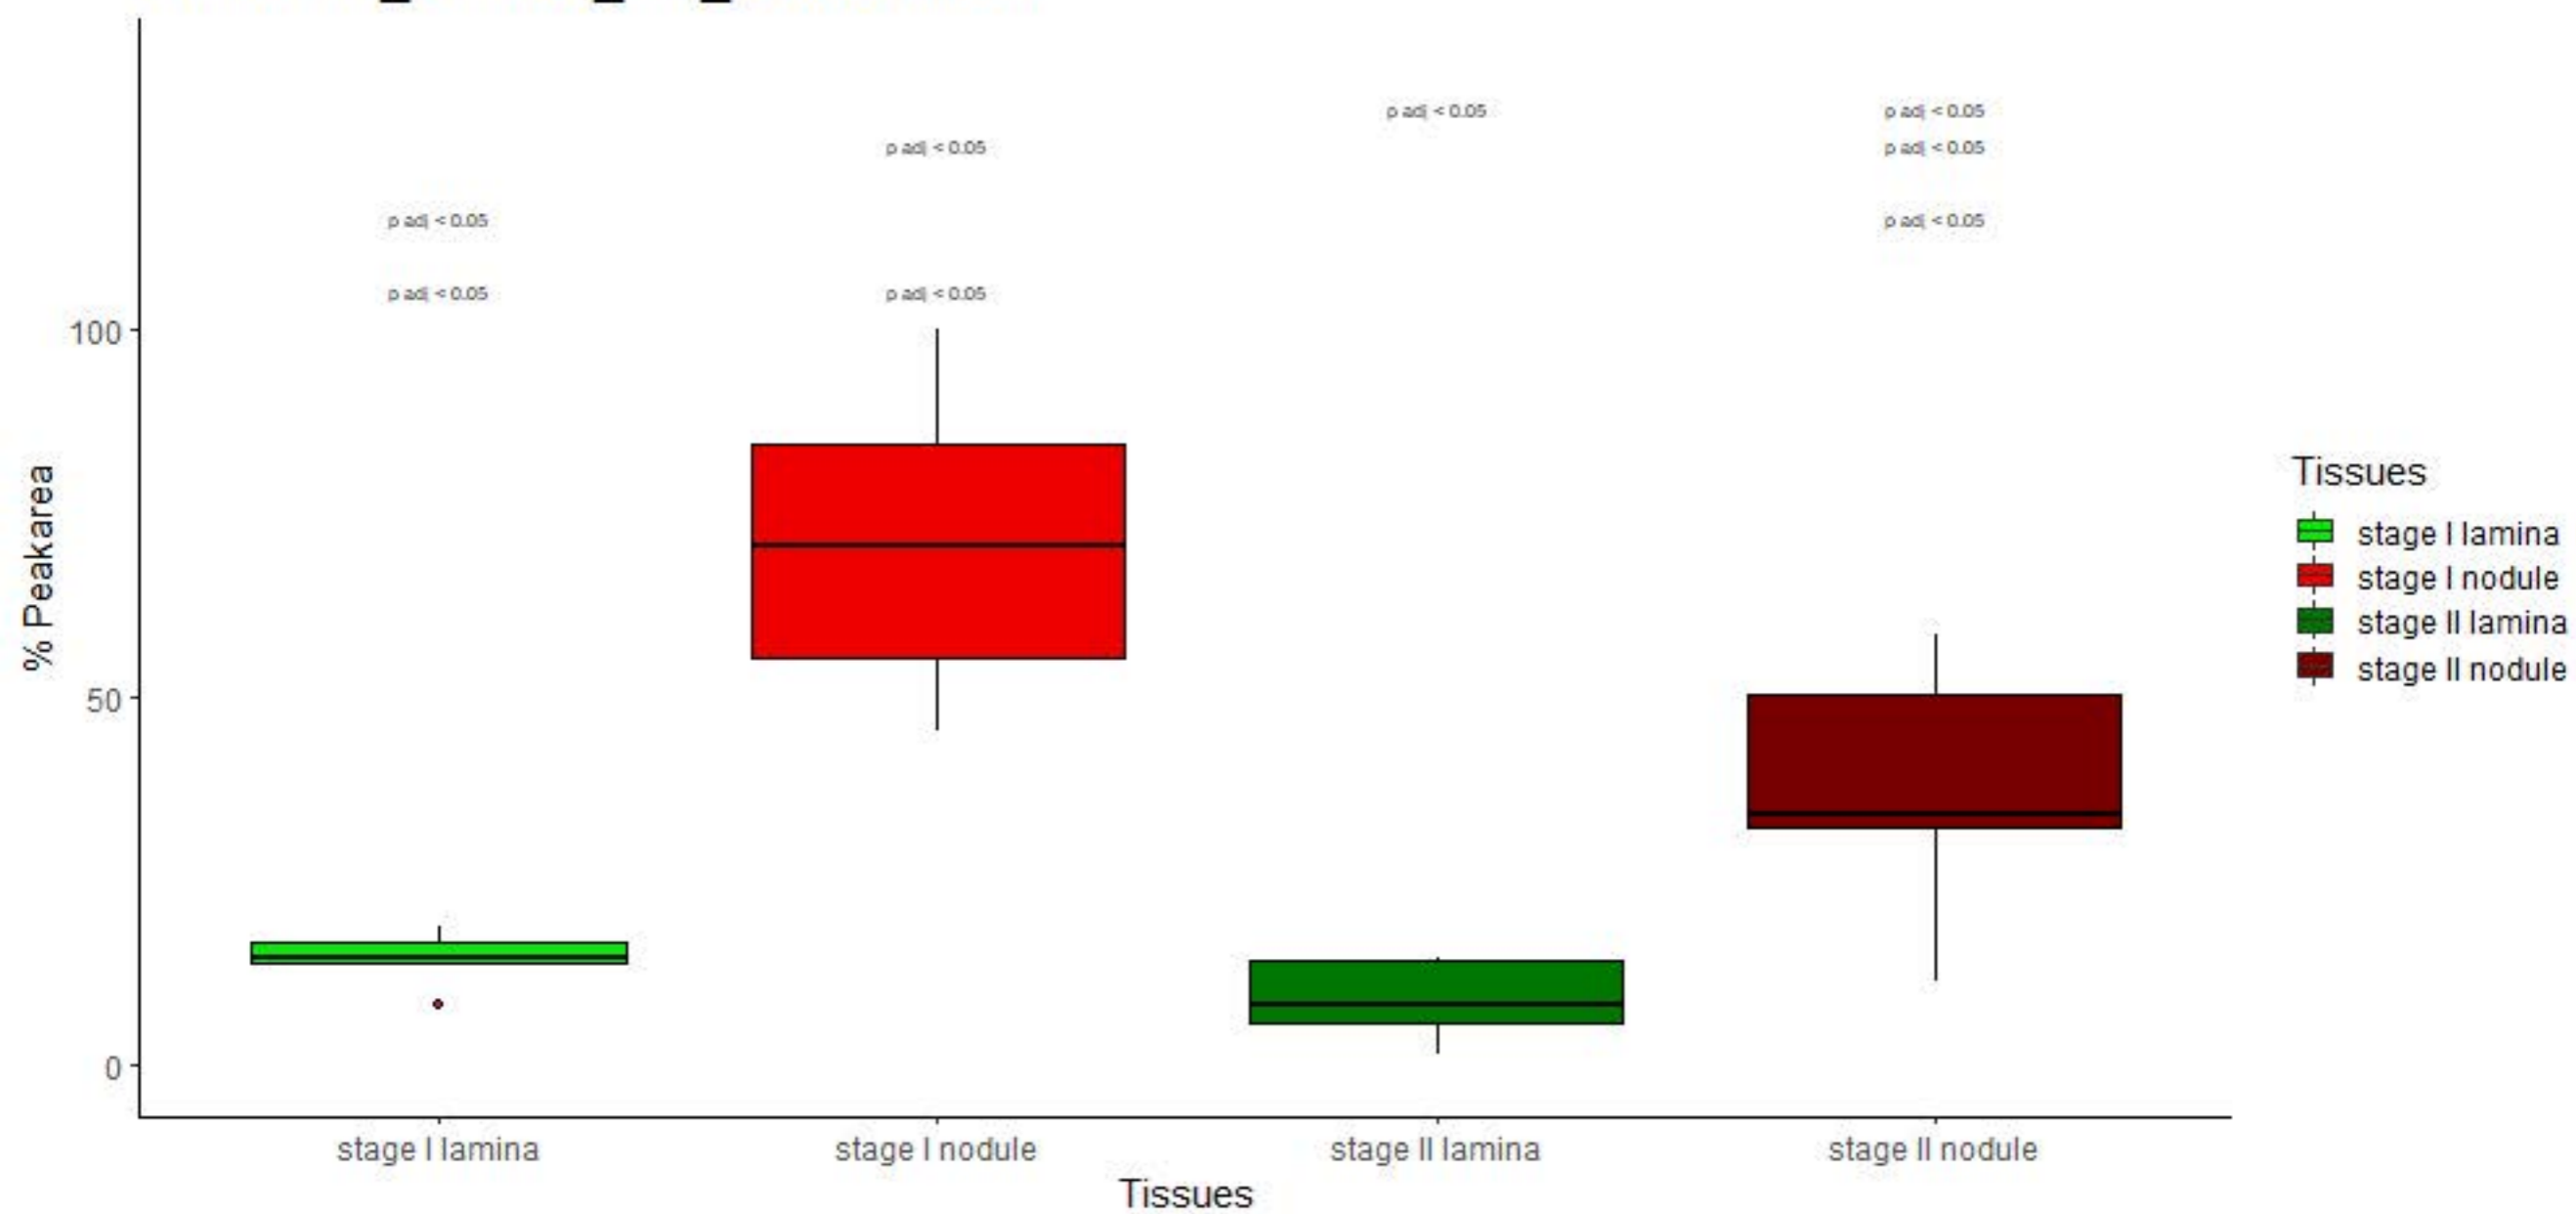

# Guanosine\_monophosphate\_RT:3.43\_min\_m/z:364.0653

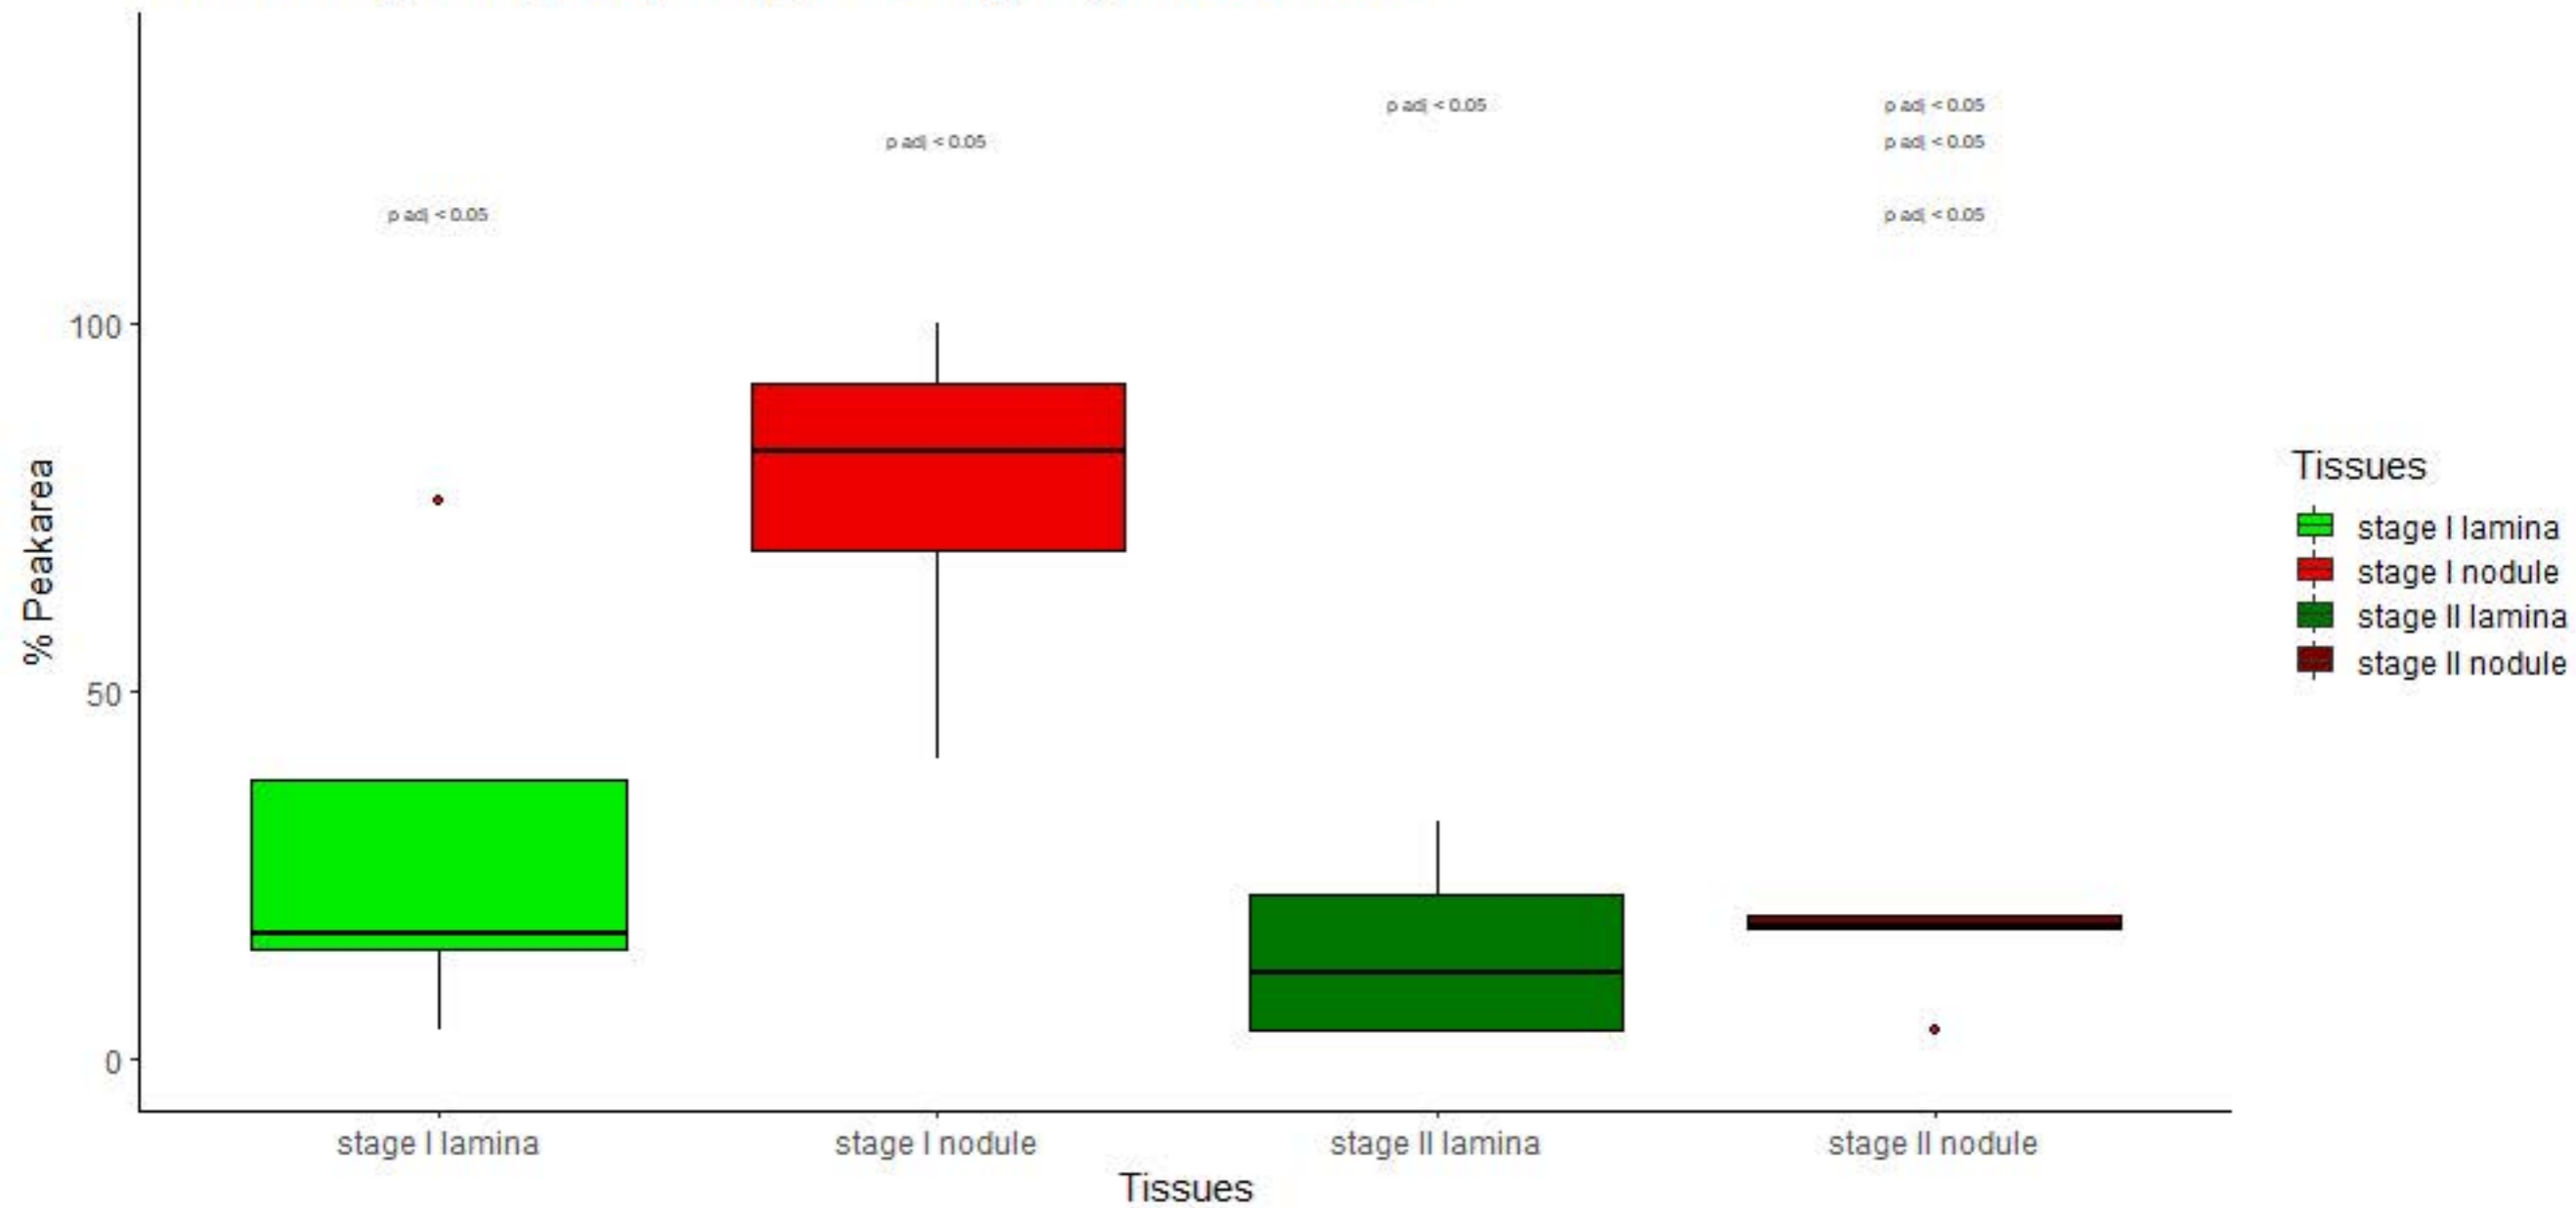

# Zeatin\_glucoside\_RT:14.96\_min\_m/z:382.1721

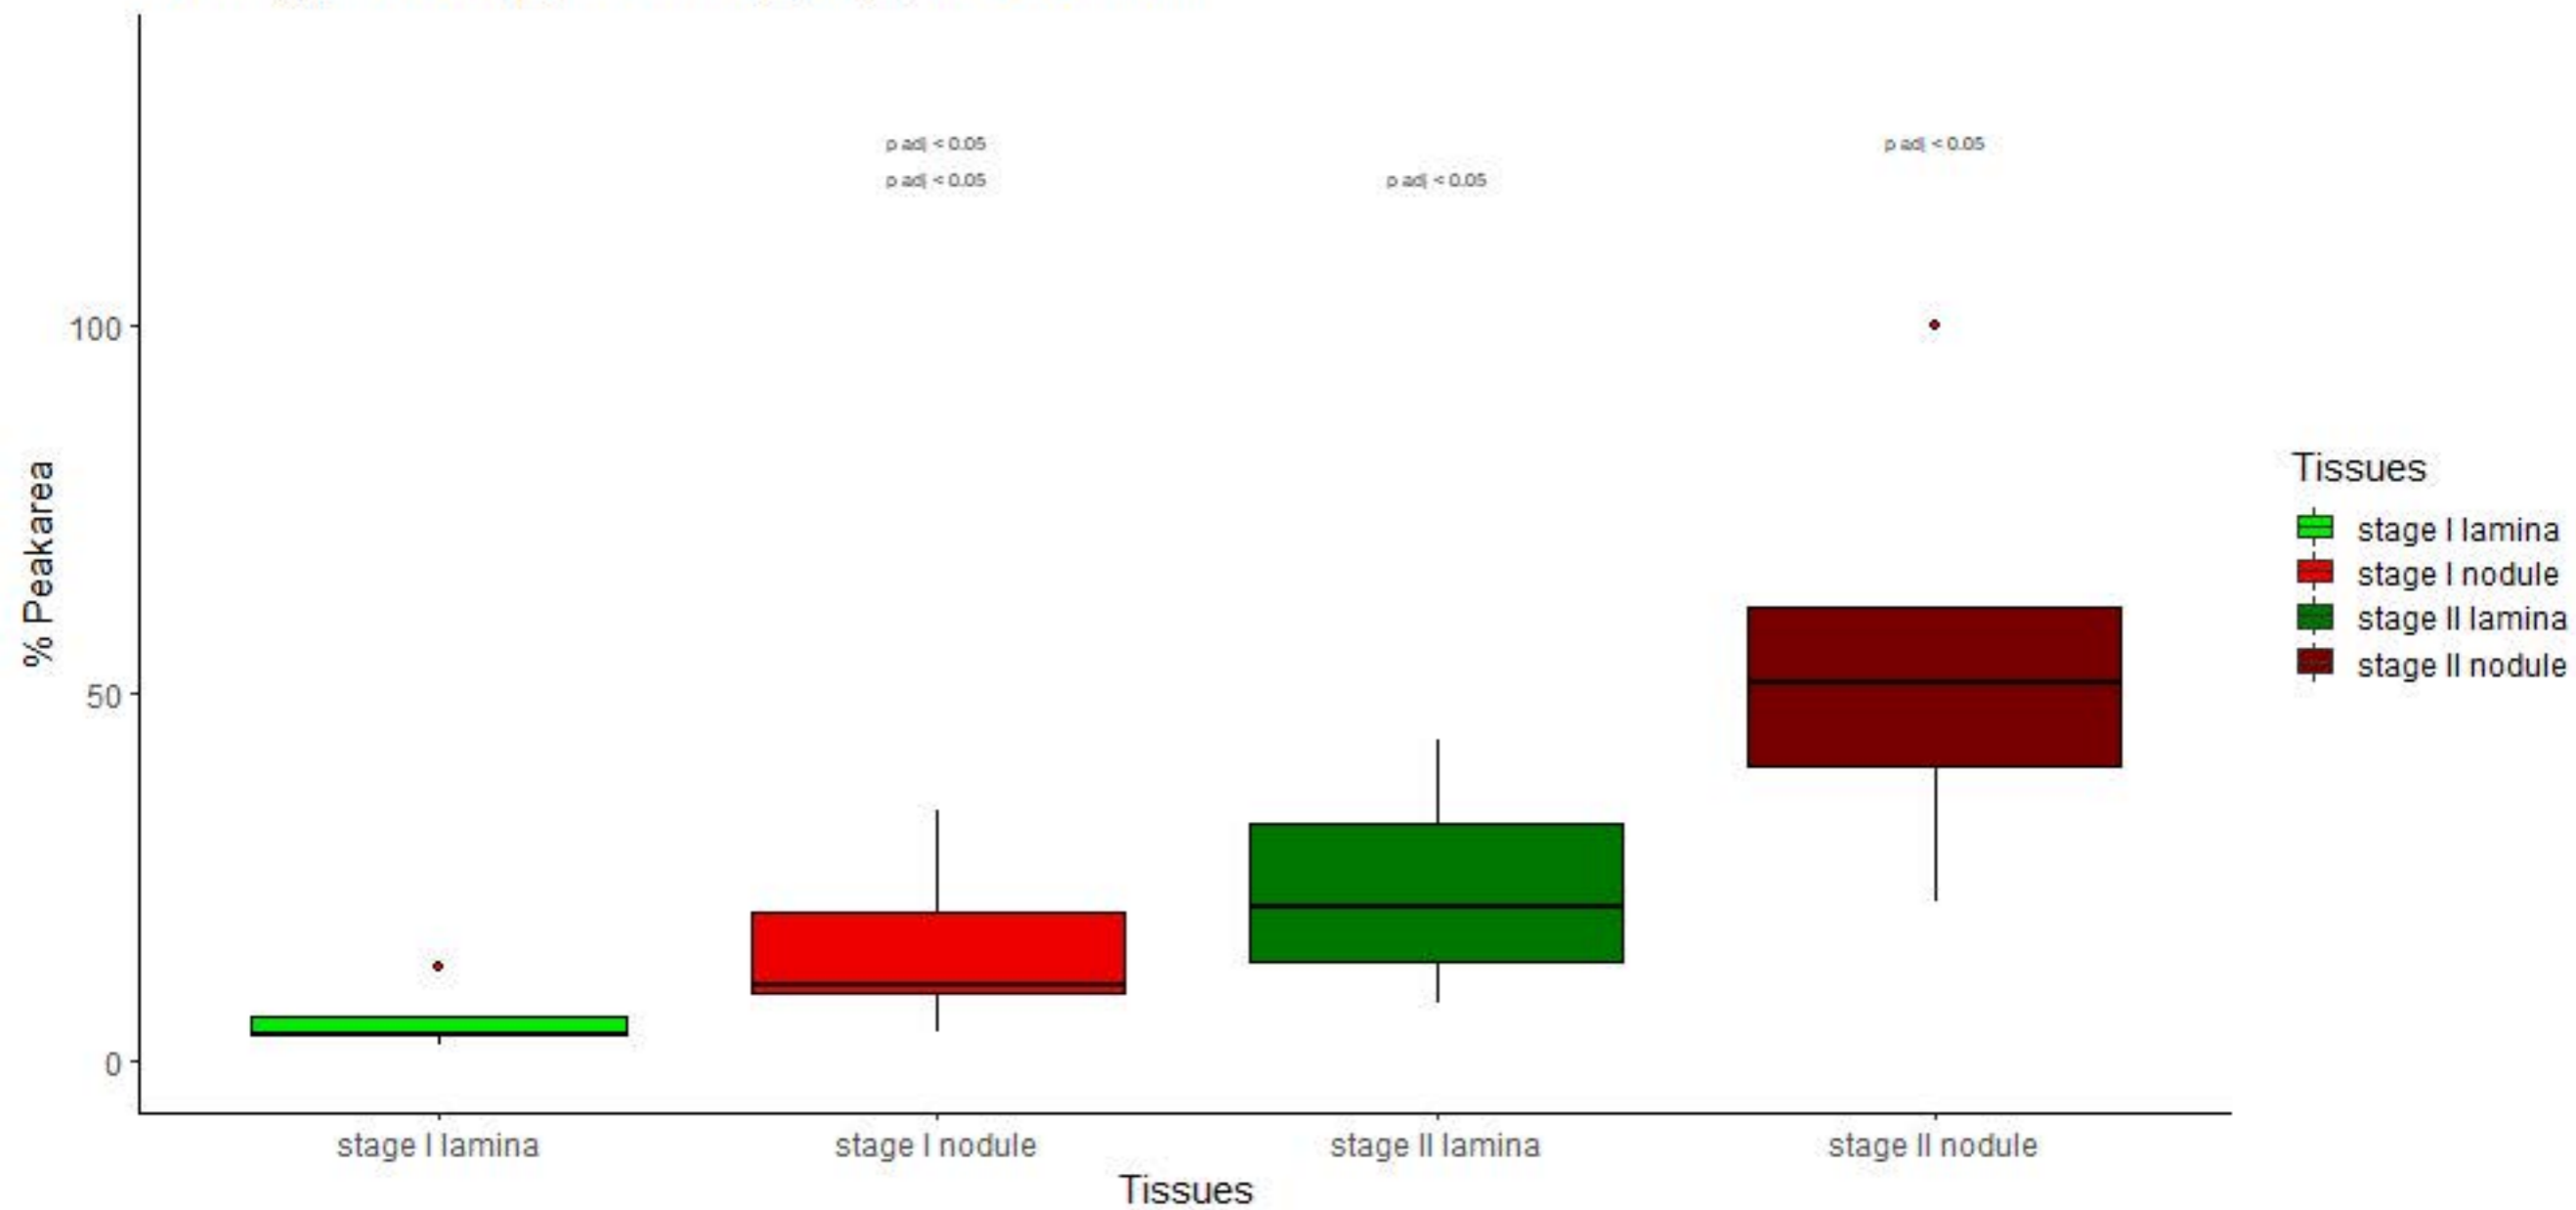



# Putative\_aminosugar\_RT:13.96\_min\_m/z:647.2878

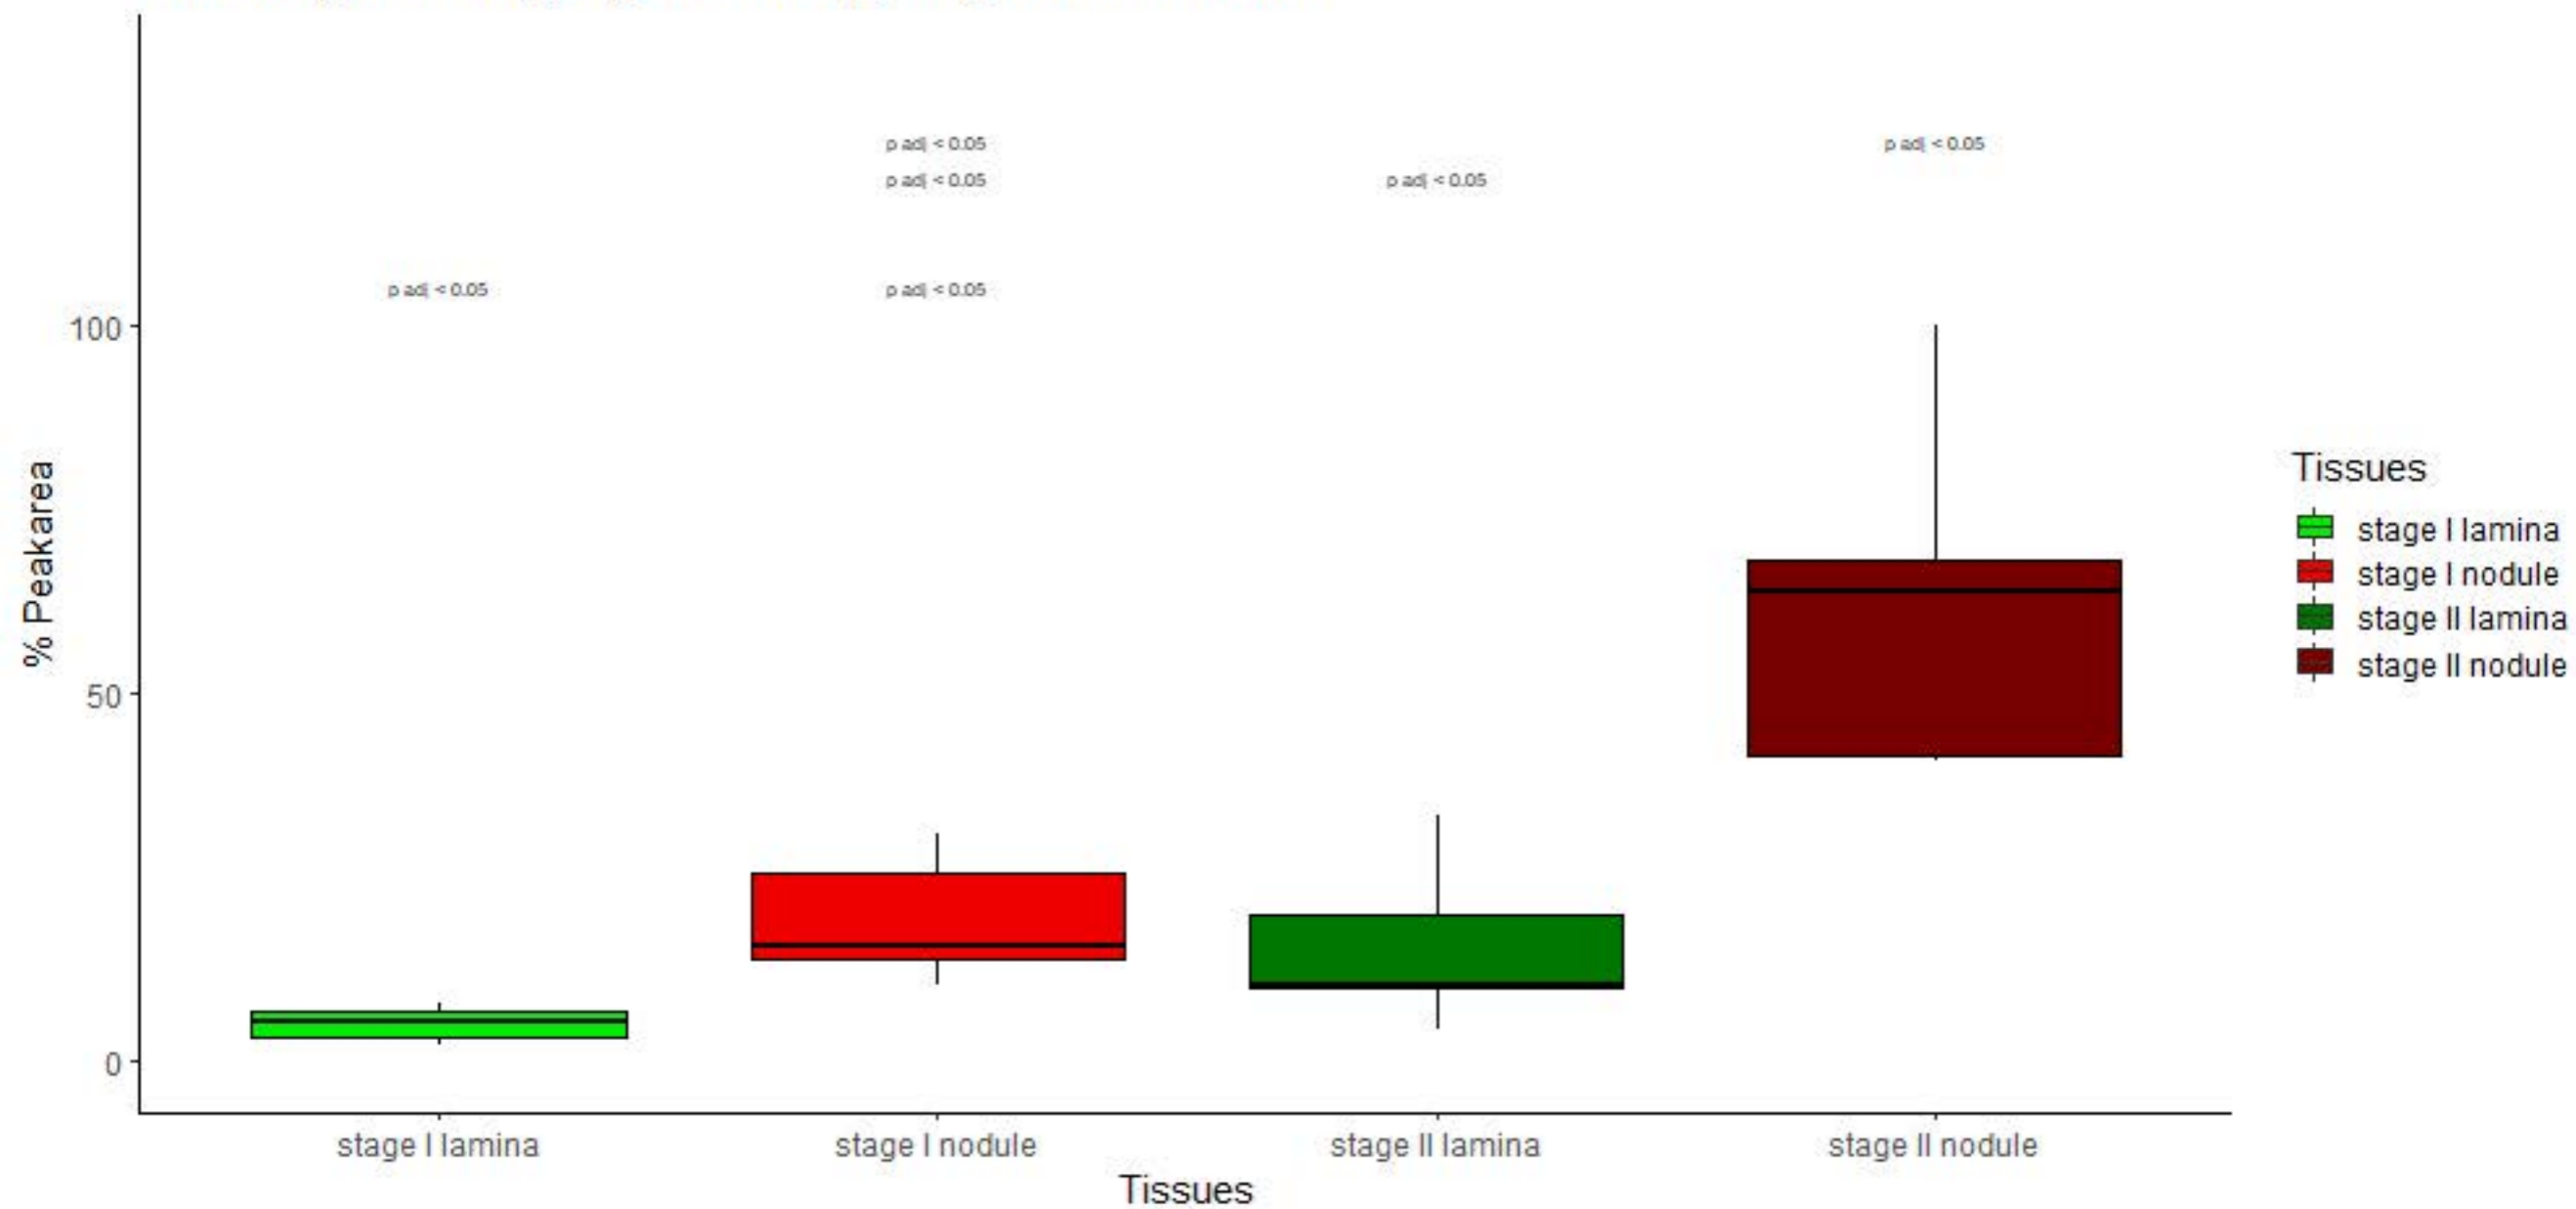

# Putative\_aminosugar\_RT:14.14\_min\_m/z:648.2713

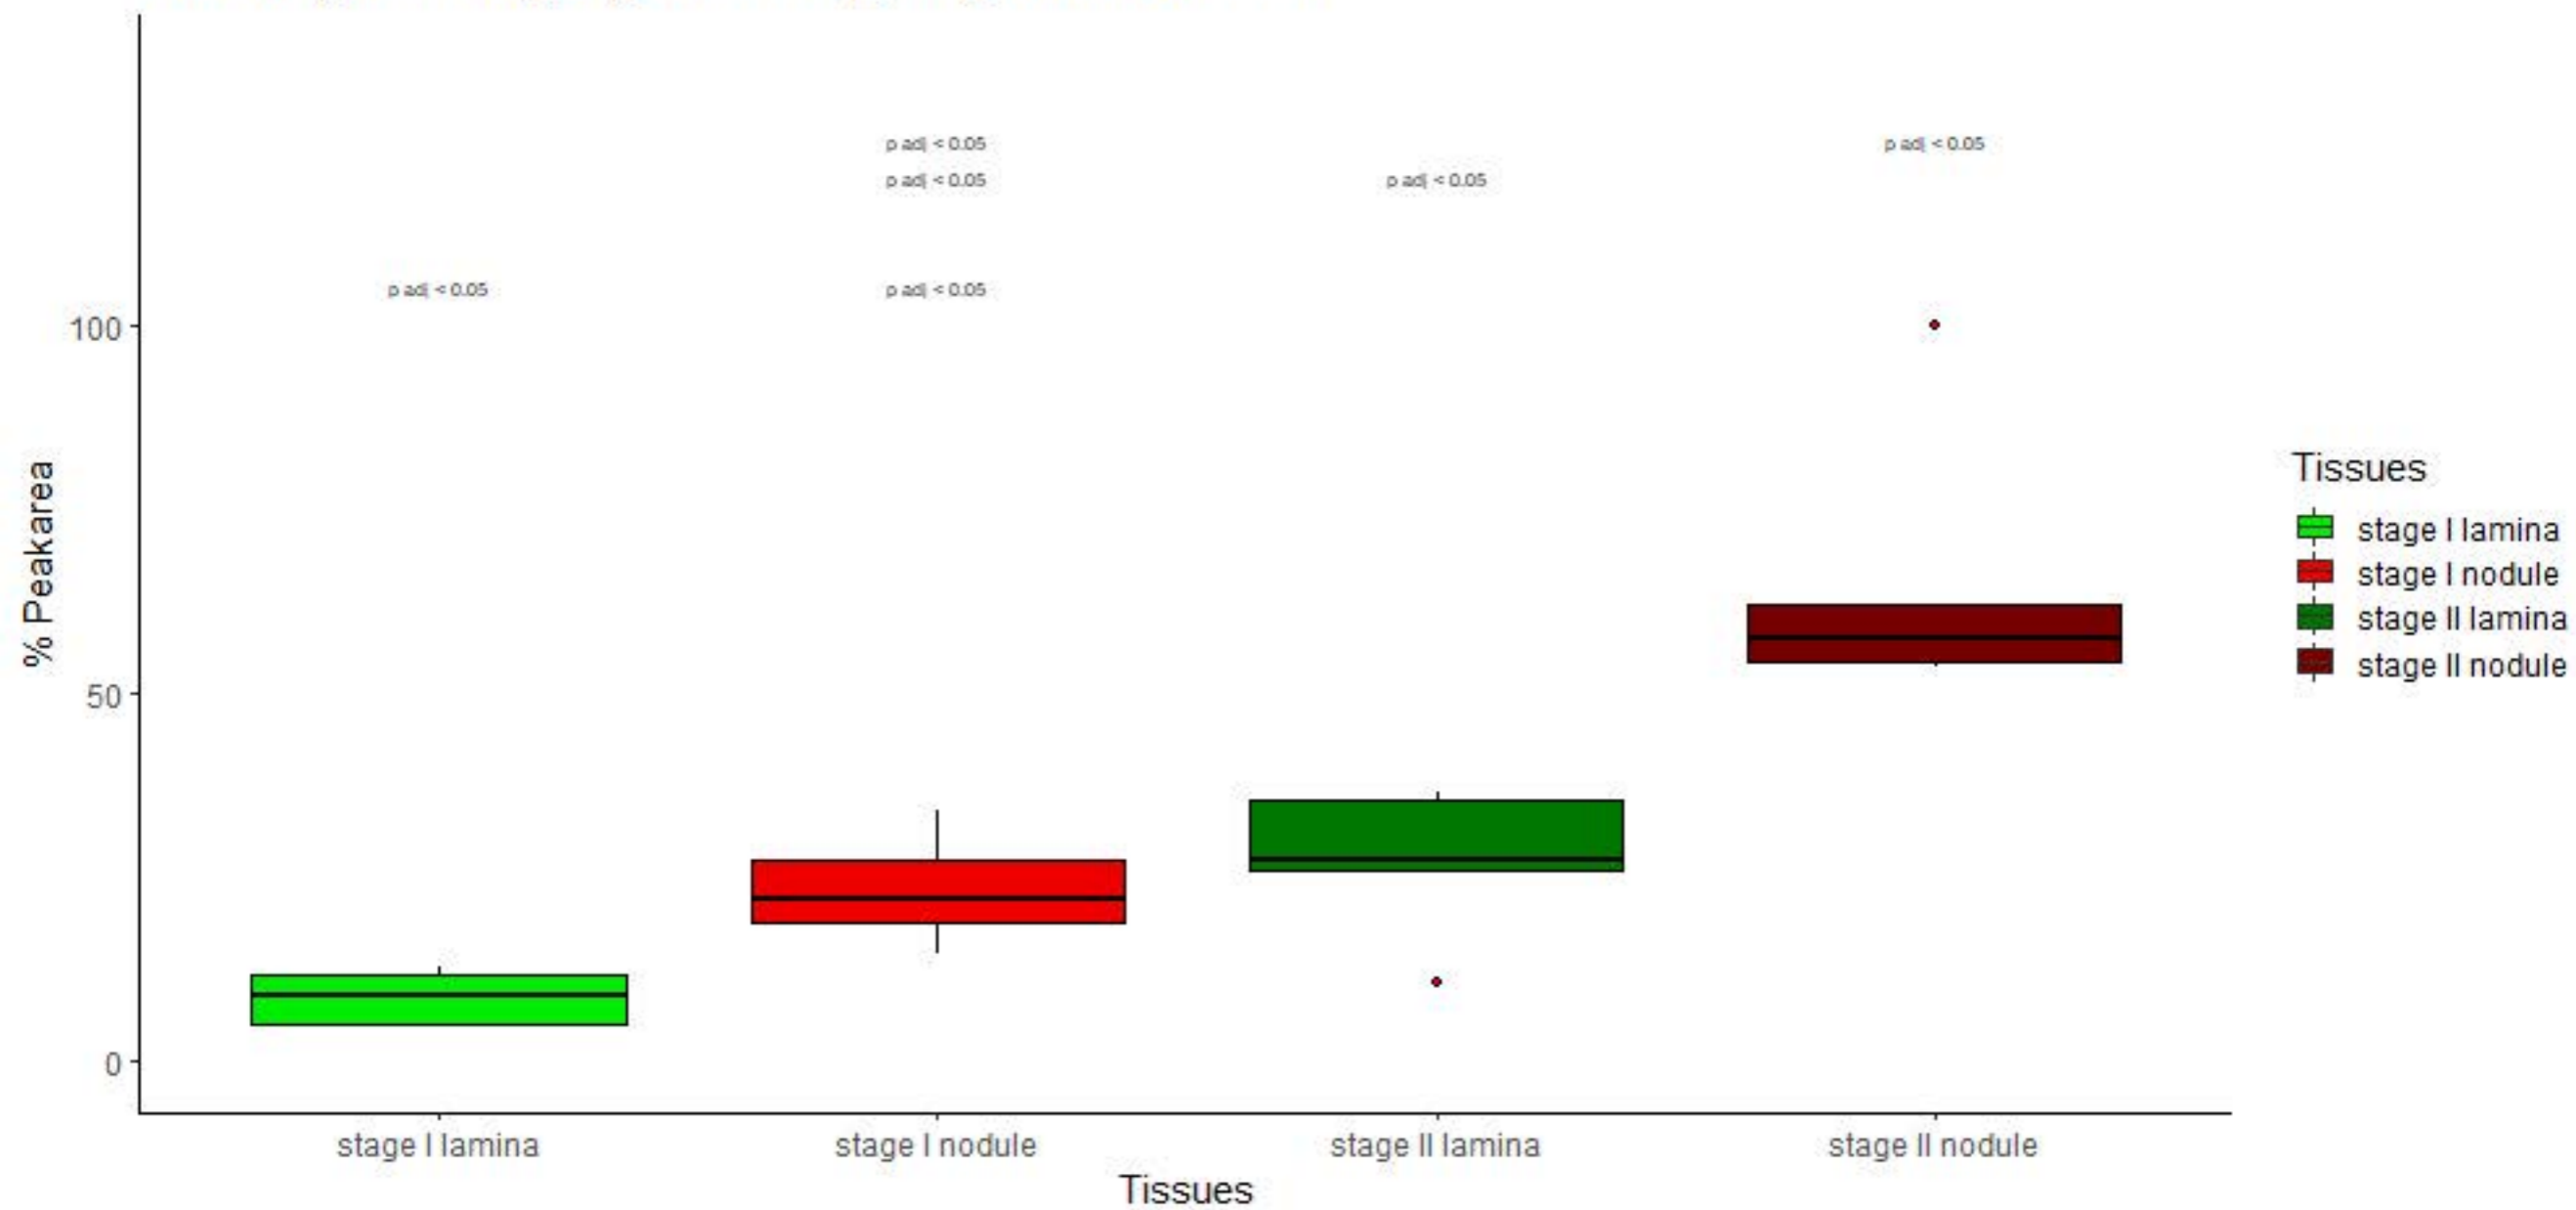

# Putative\_aminosugar\_RT:14.38\_min\_m/z:850.3661

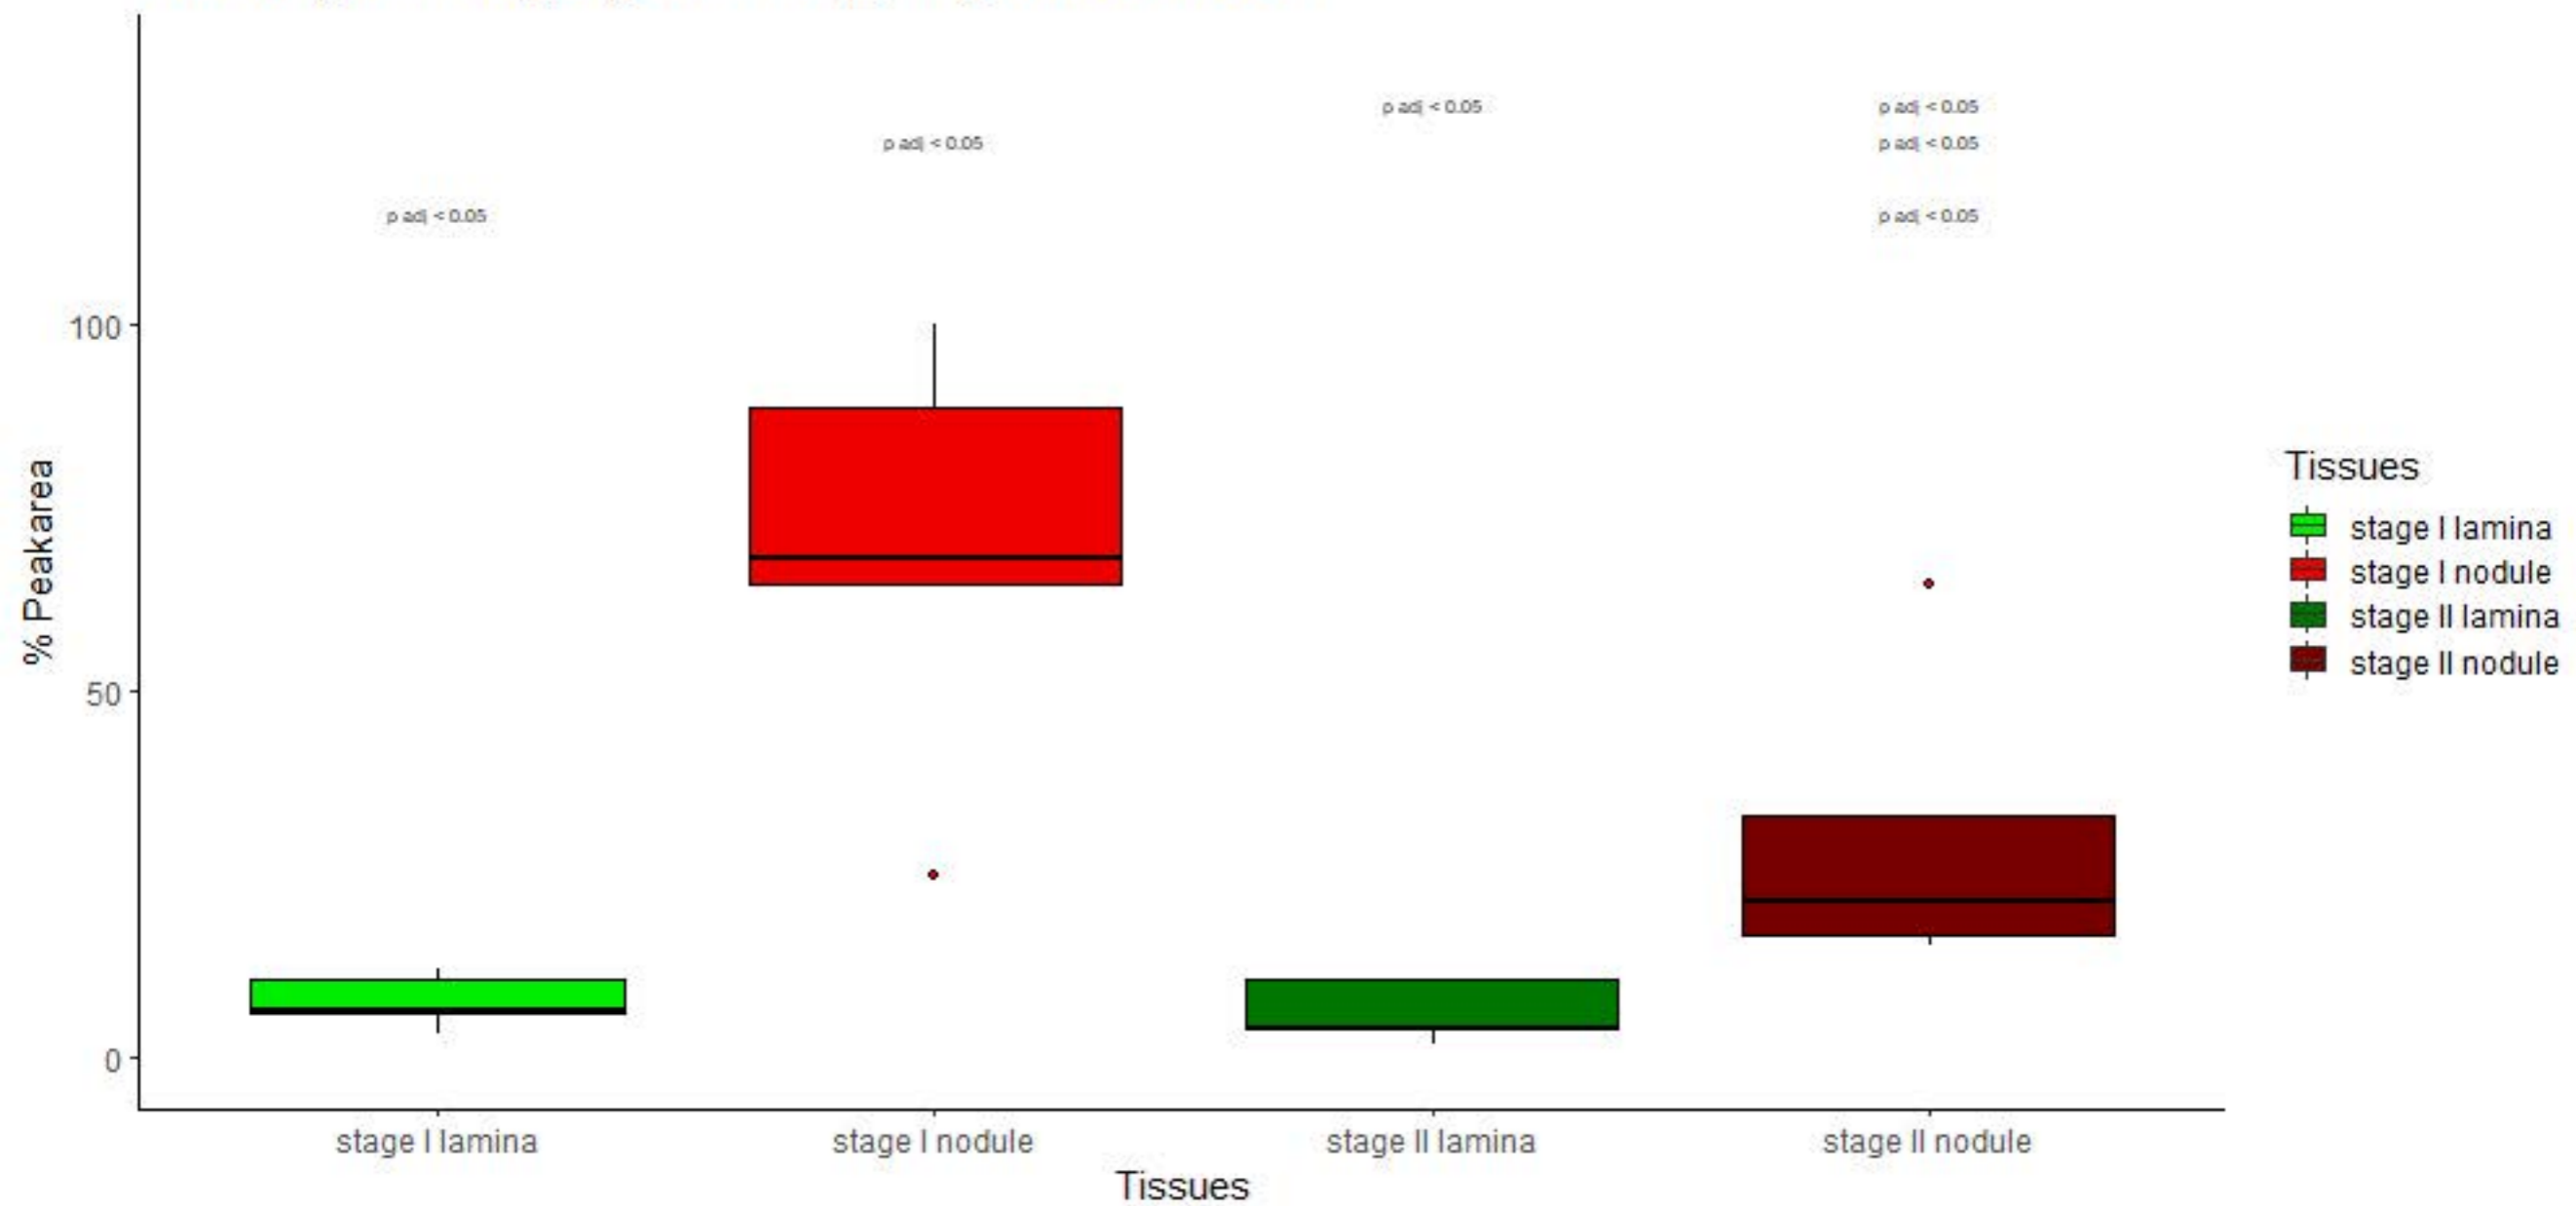

Putative\_aminosugar\_RT:14.47\_min\_m/z:851.3517

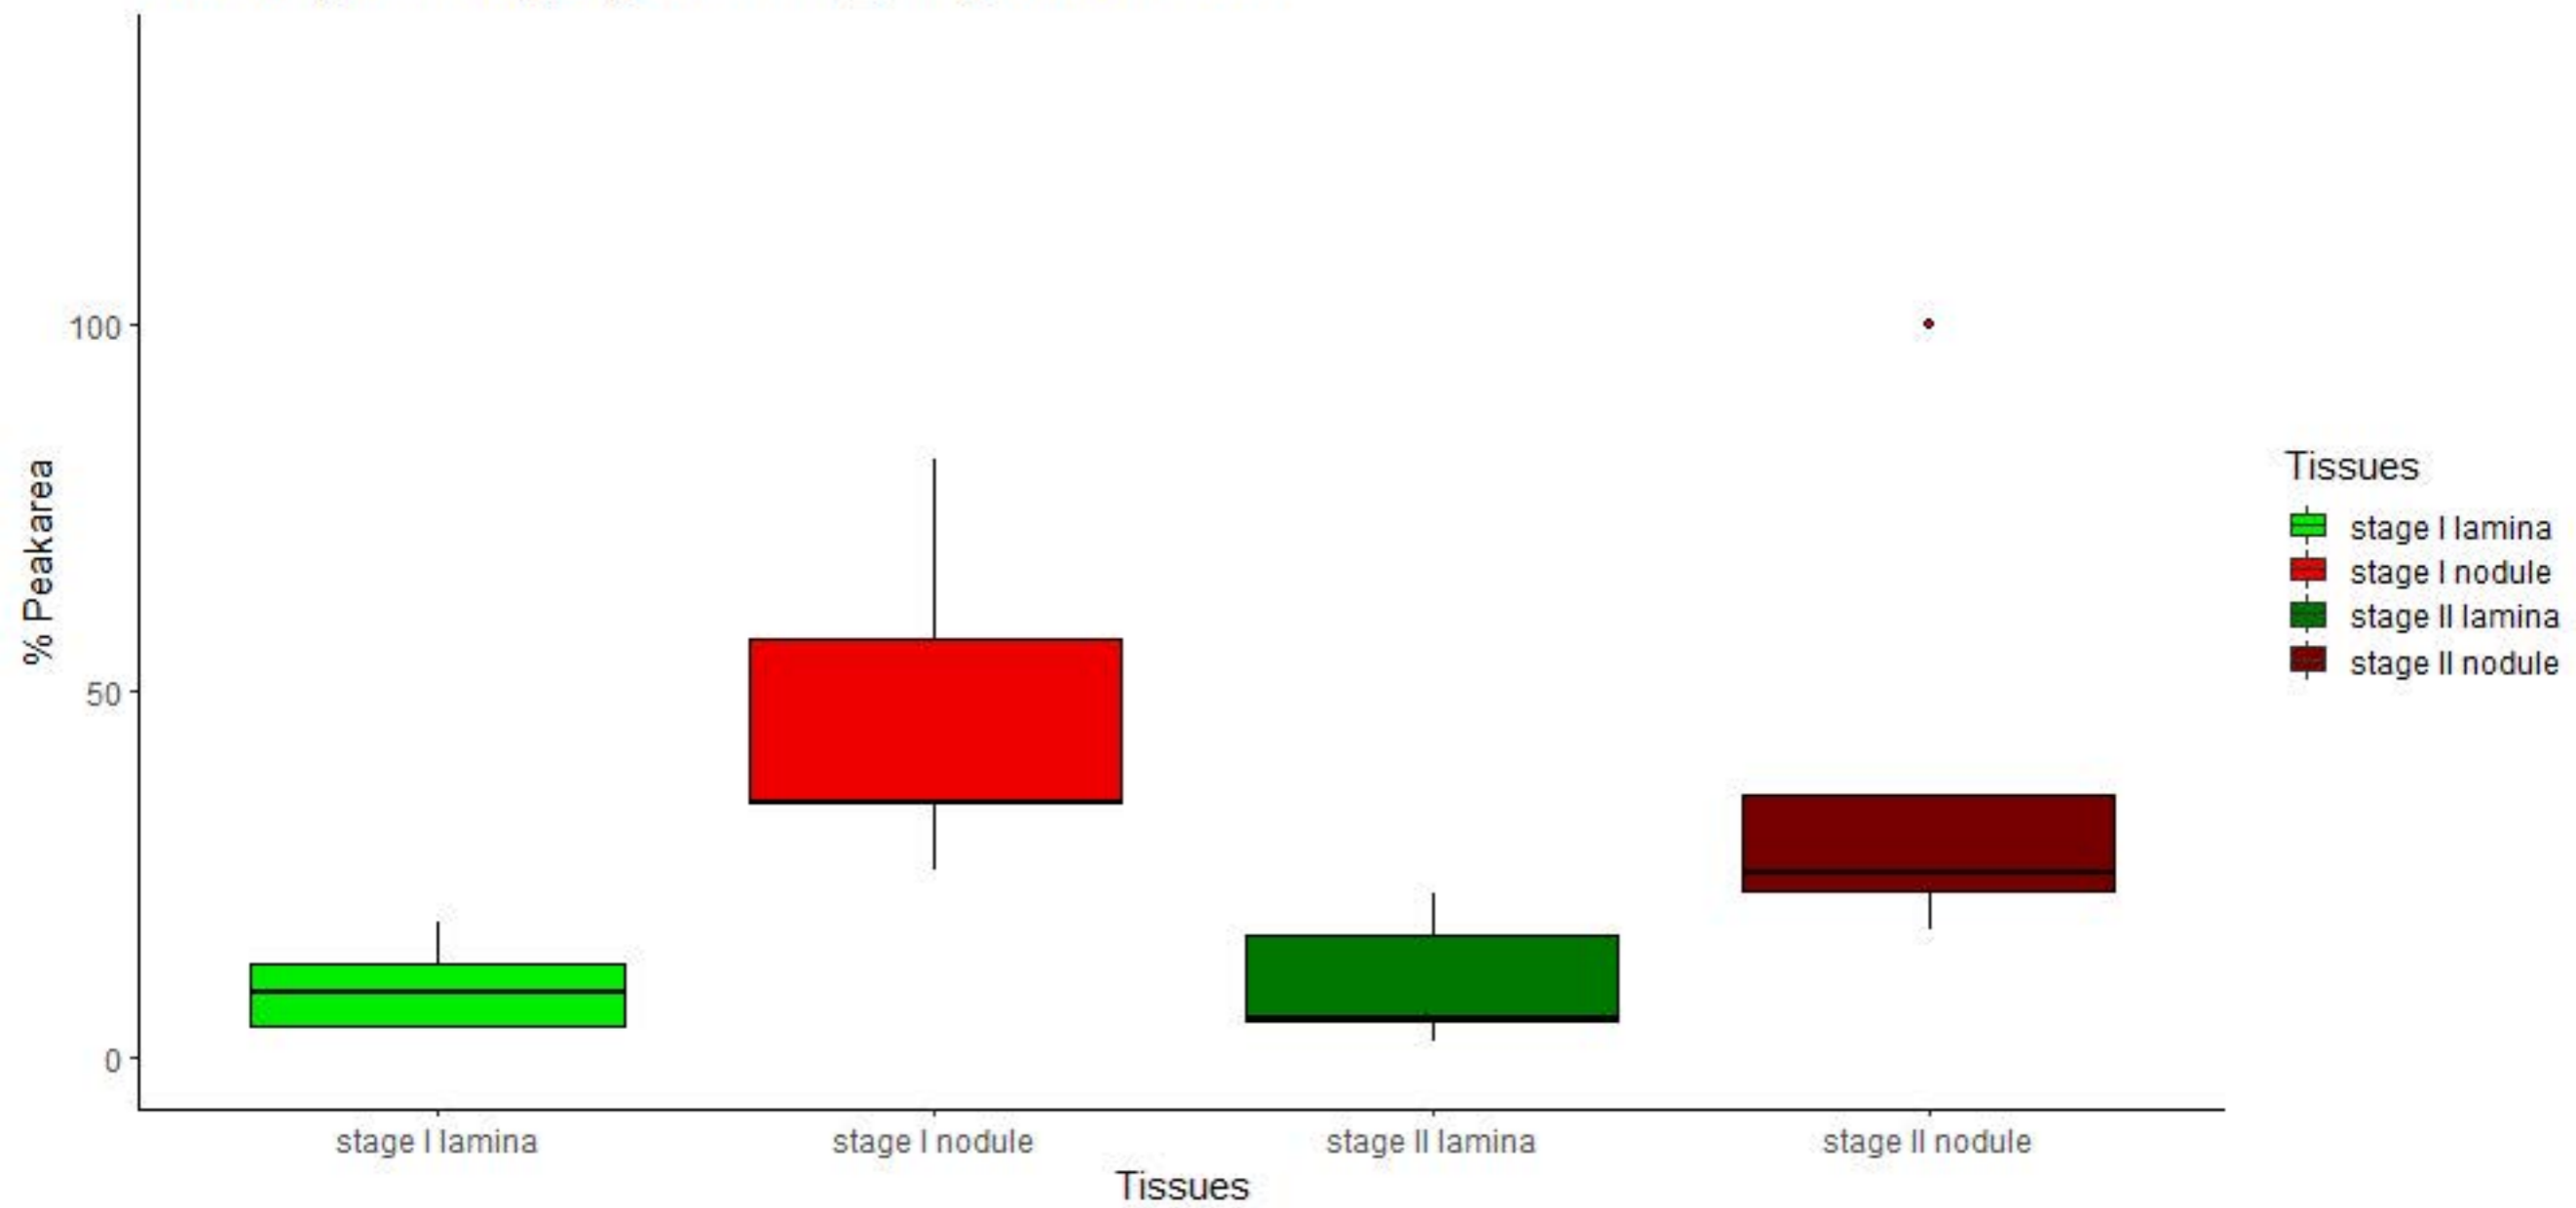

# Putative\_aminosugar\_RT:15.24\_min\_m/z:689.2983

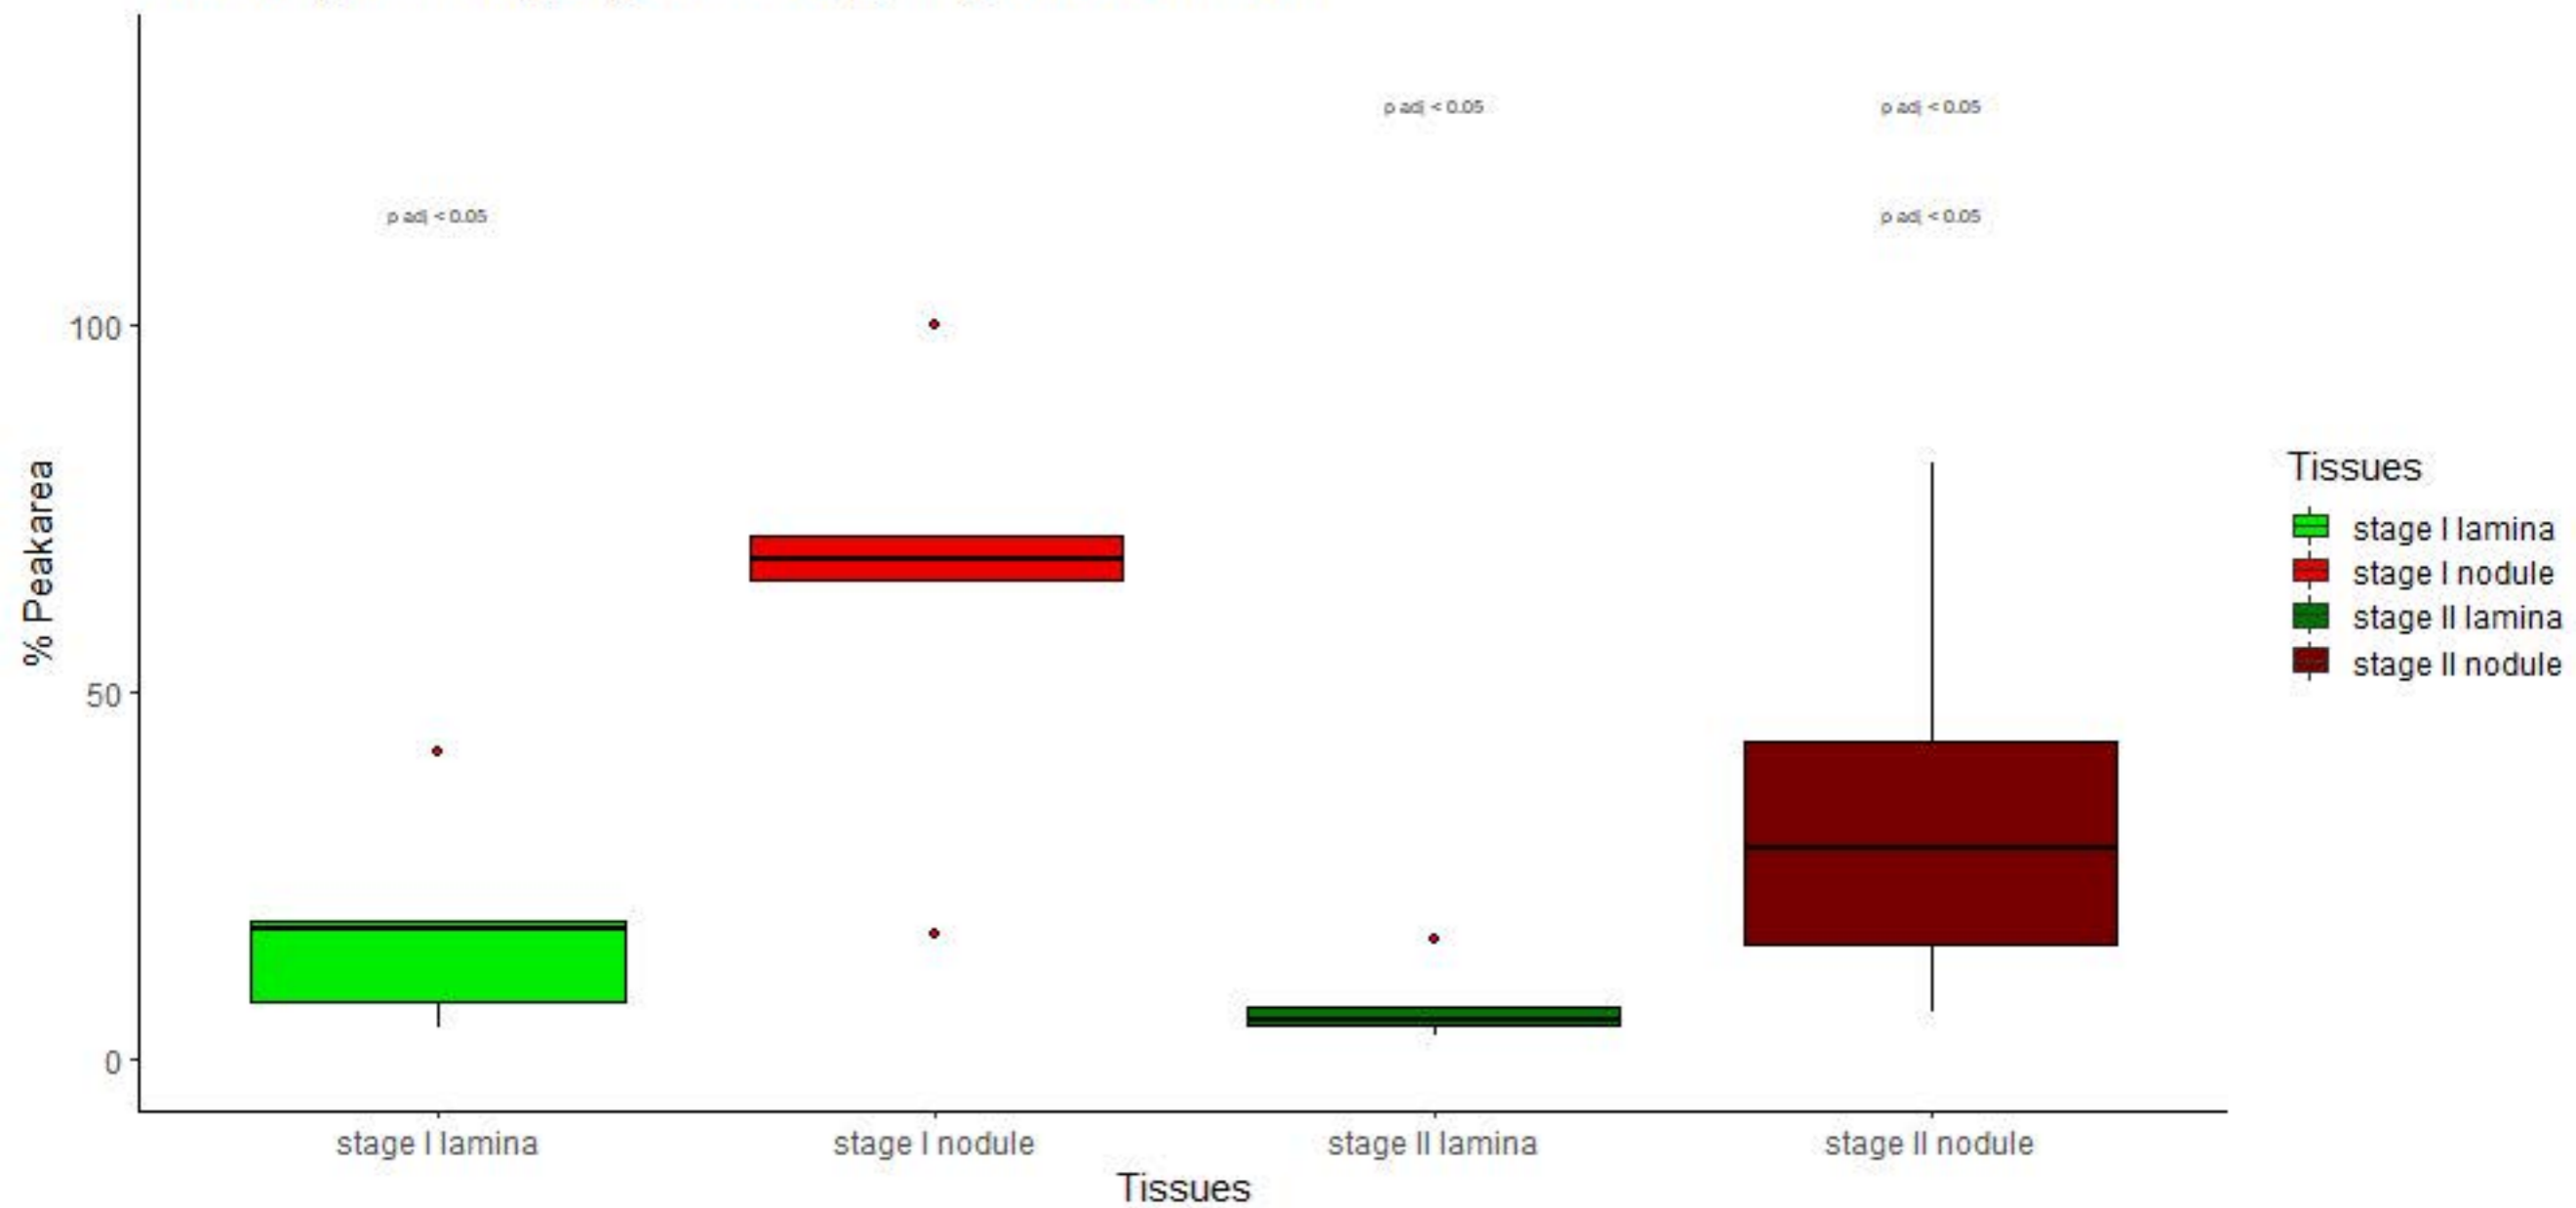

# Putative\_aminosugar\_RT:15.31\_min\_m/z:719.3095

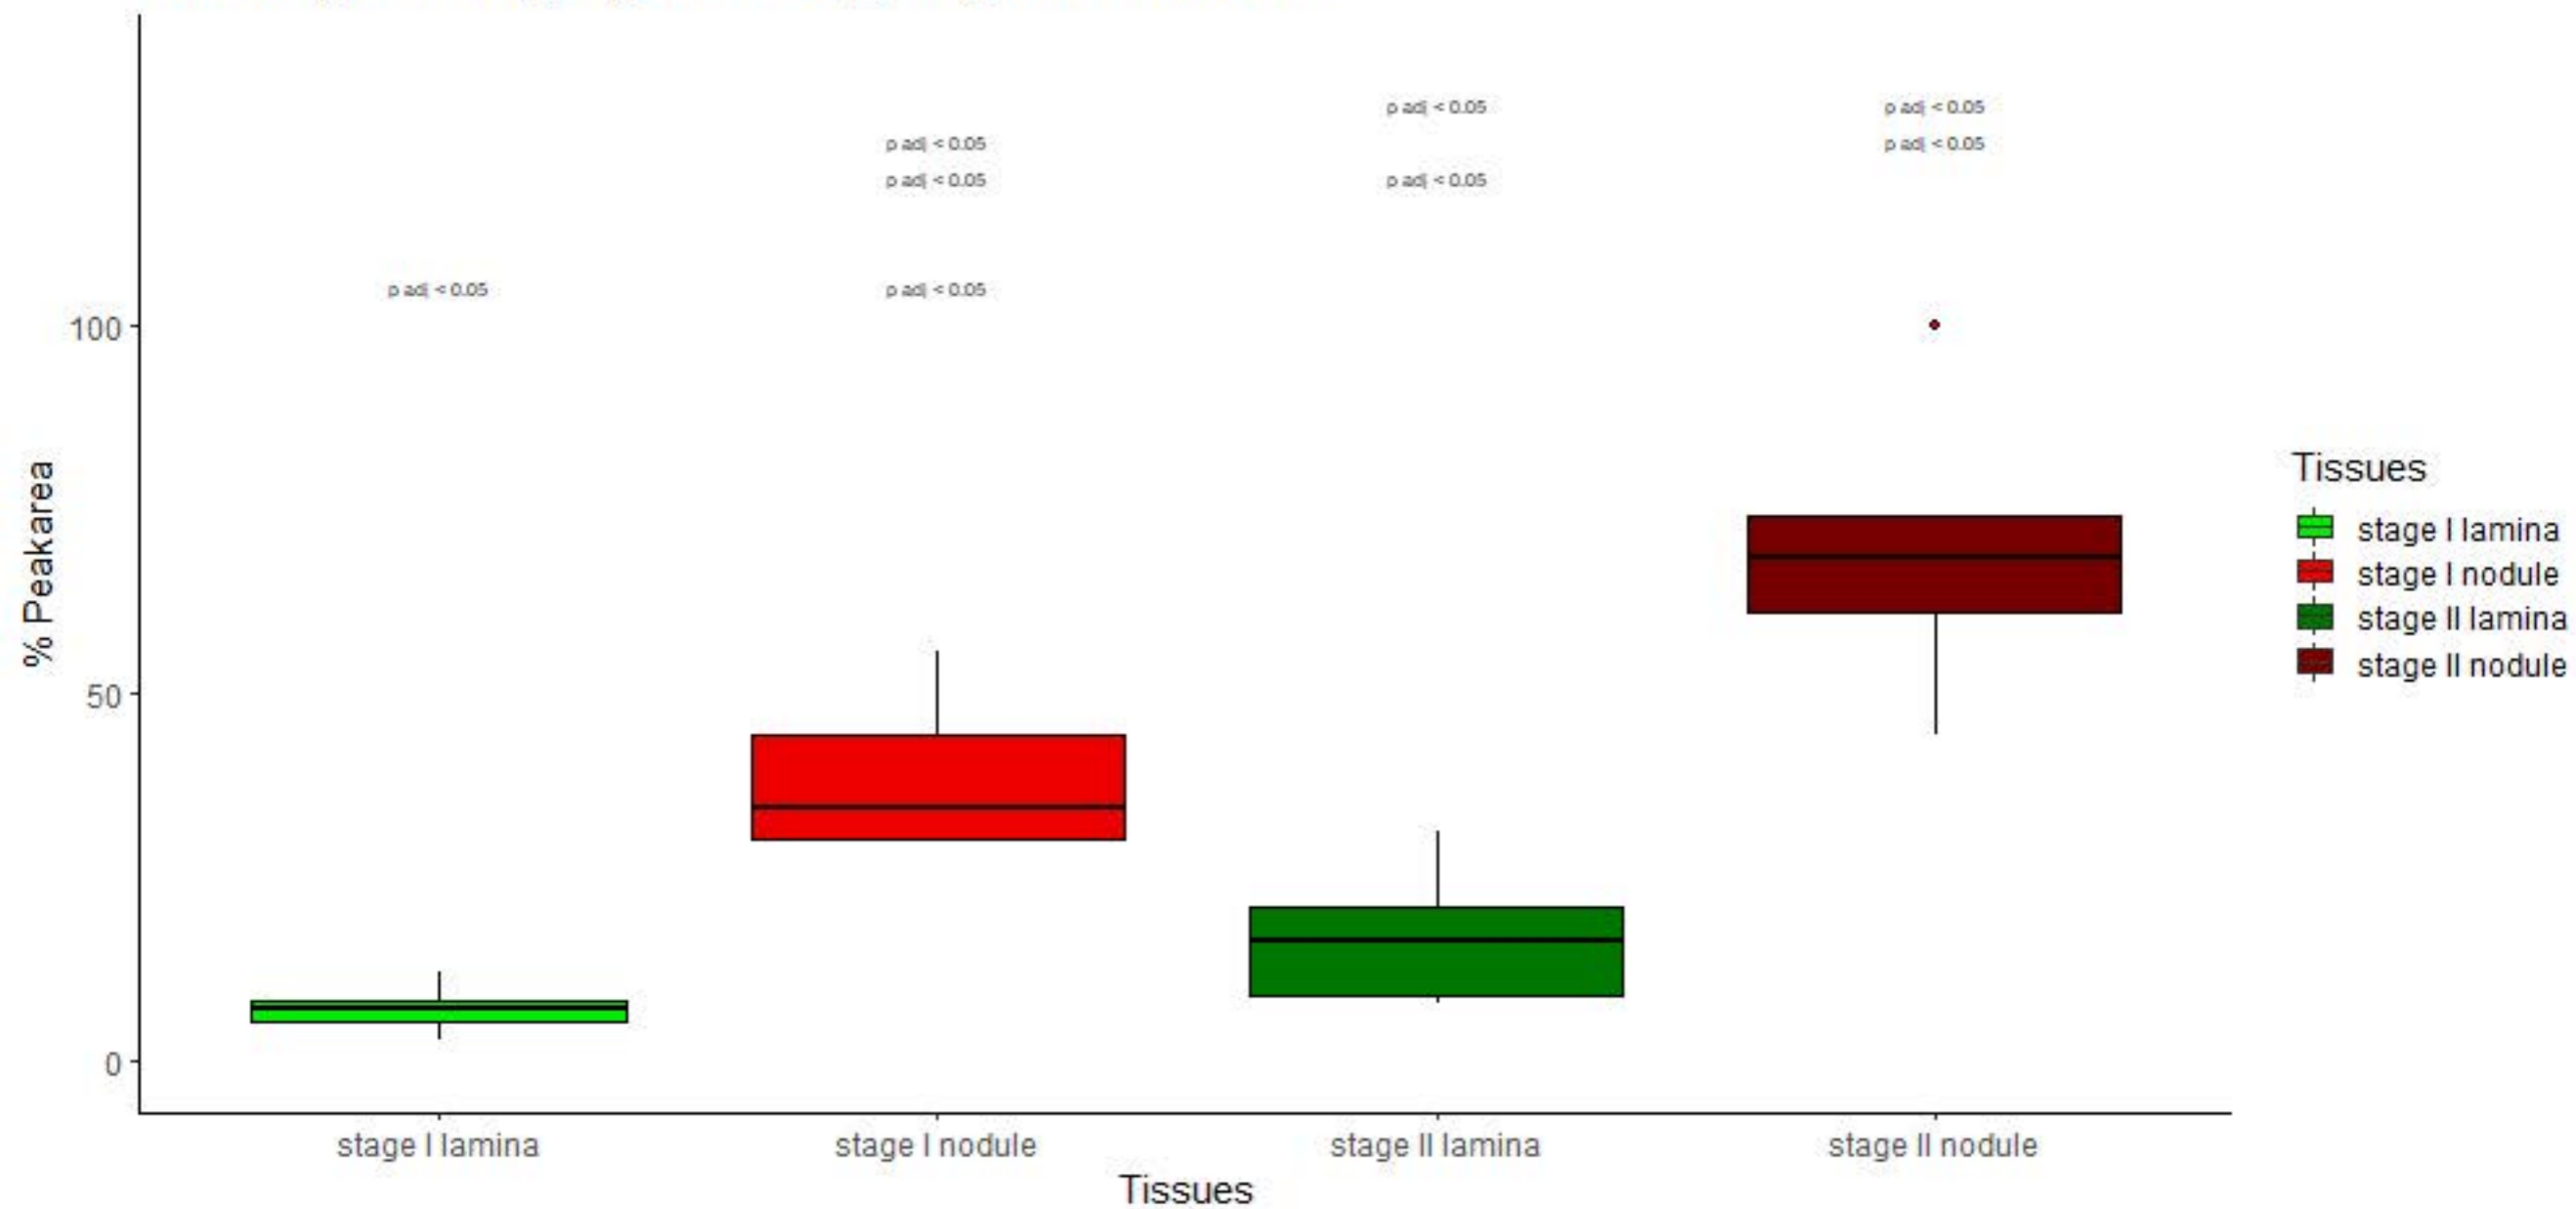

# Putative\_aminosugar\_RT:15.31\_min\_m/z:922.3883

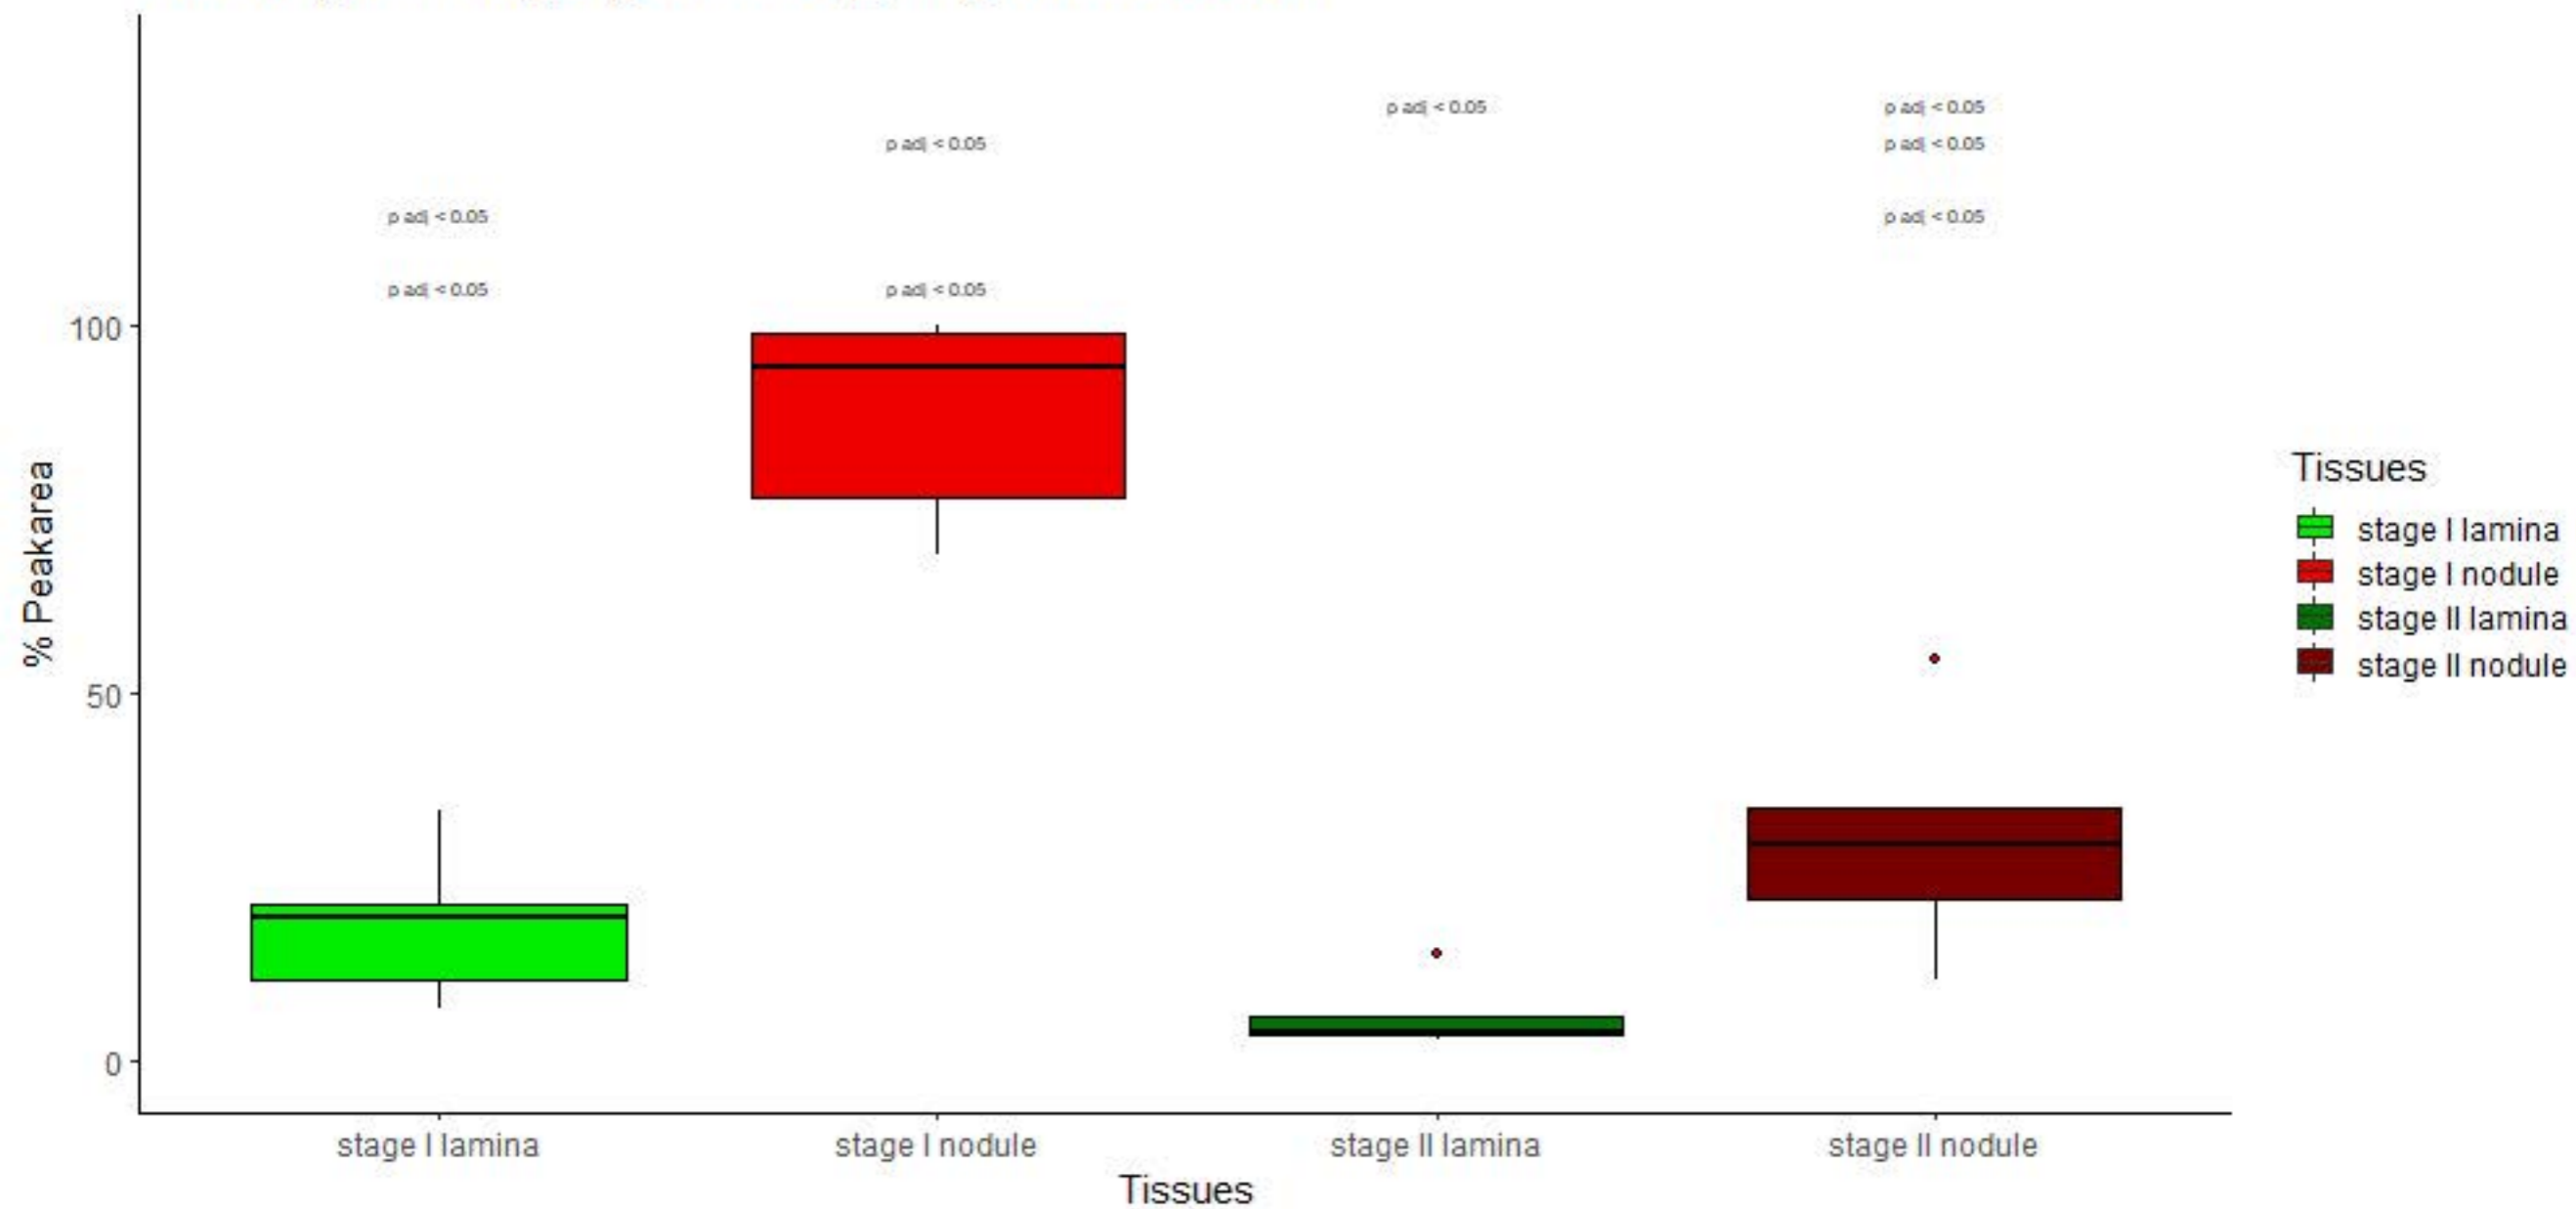

# Putative\_aminosugar\_RT:15.56\_min\_m/z:892.3788

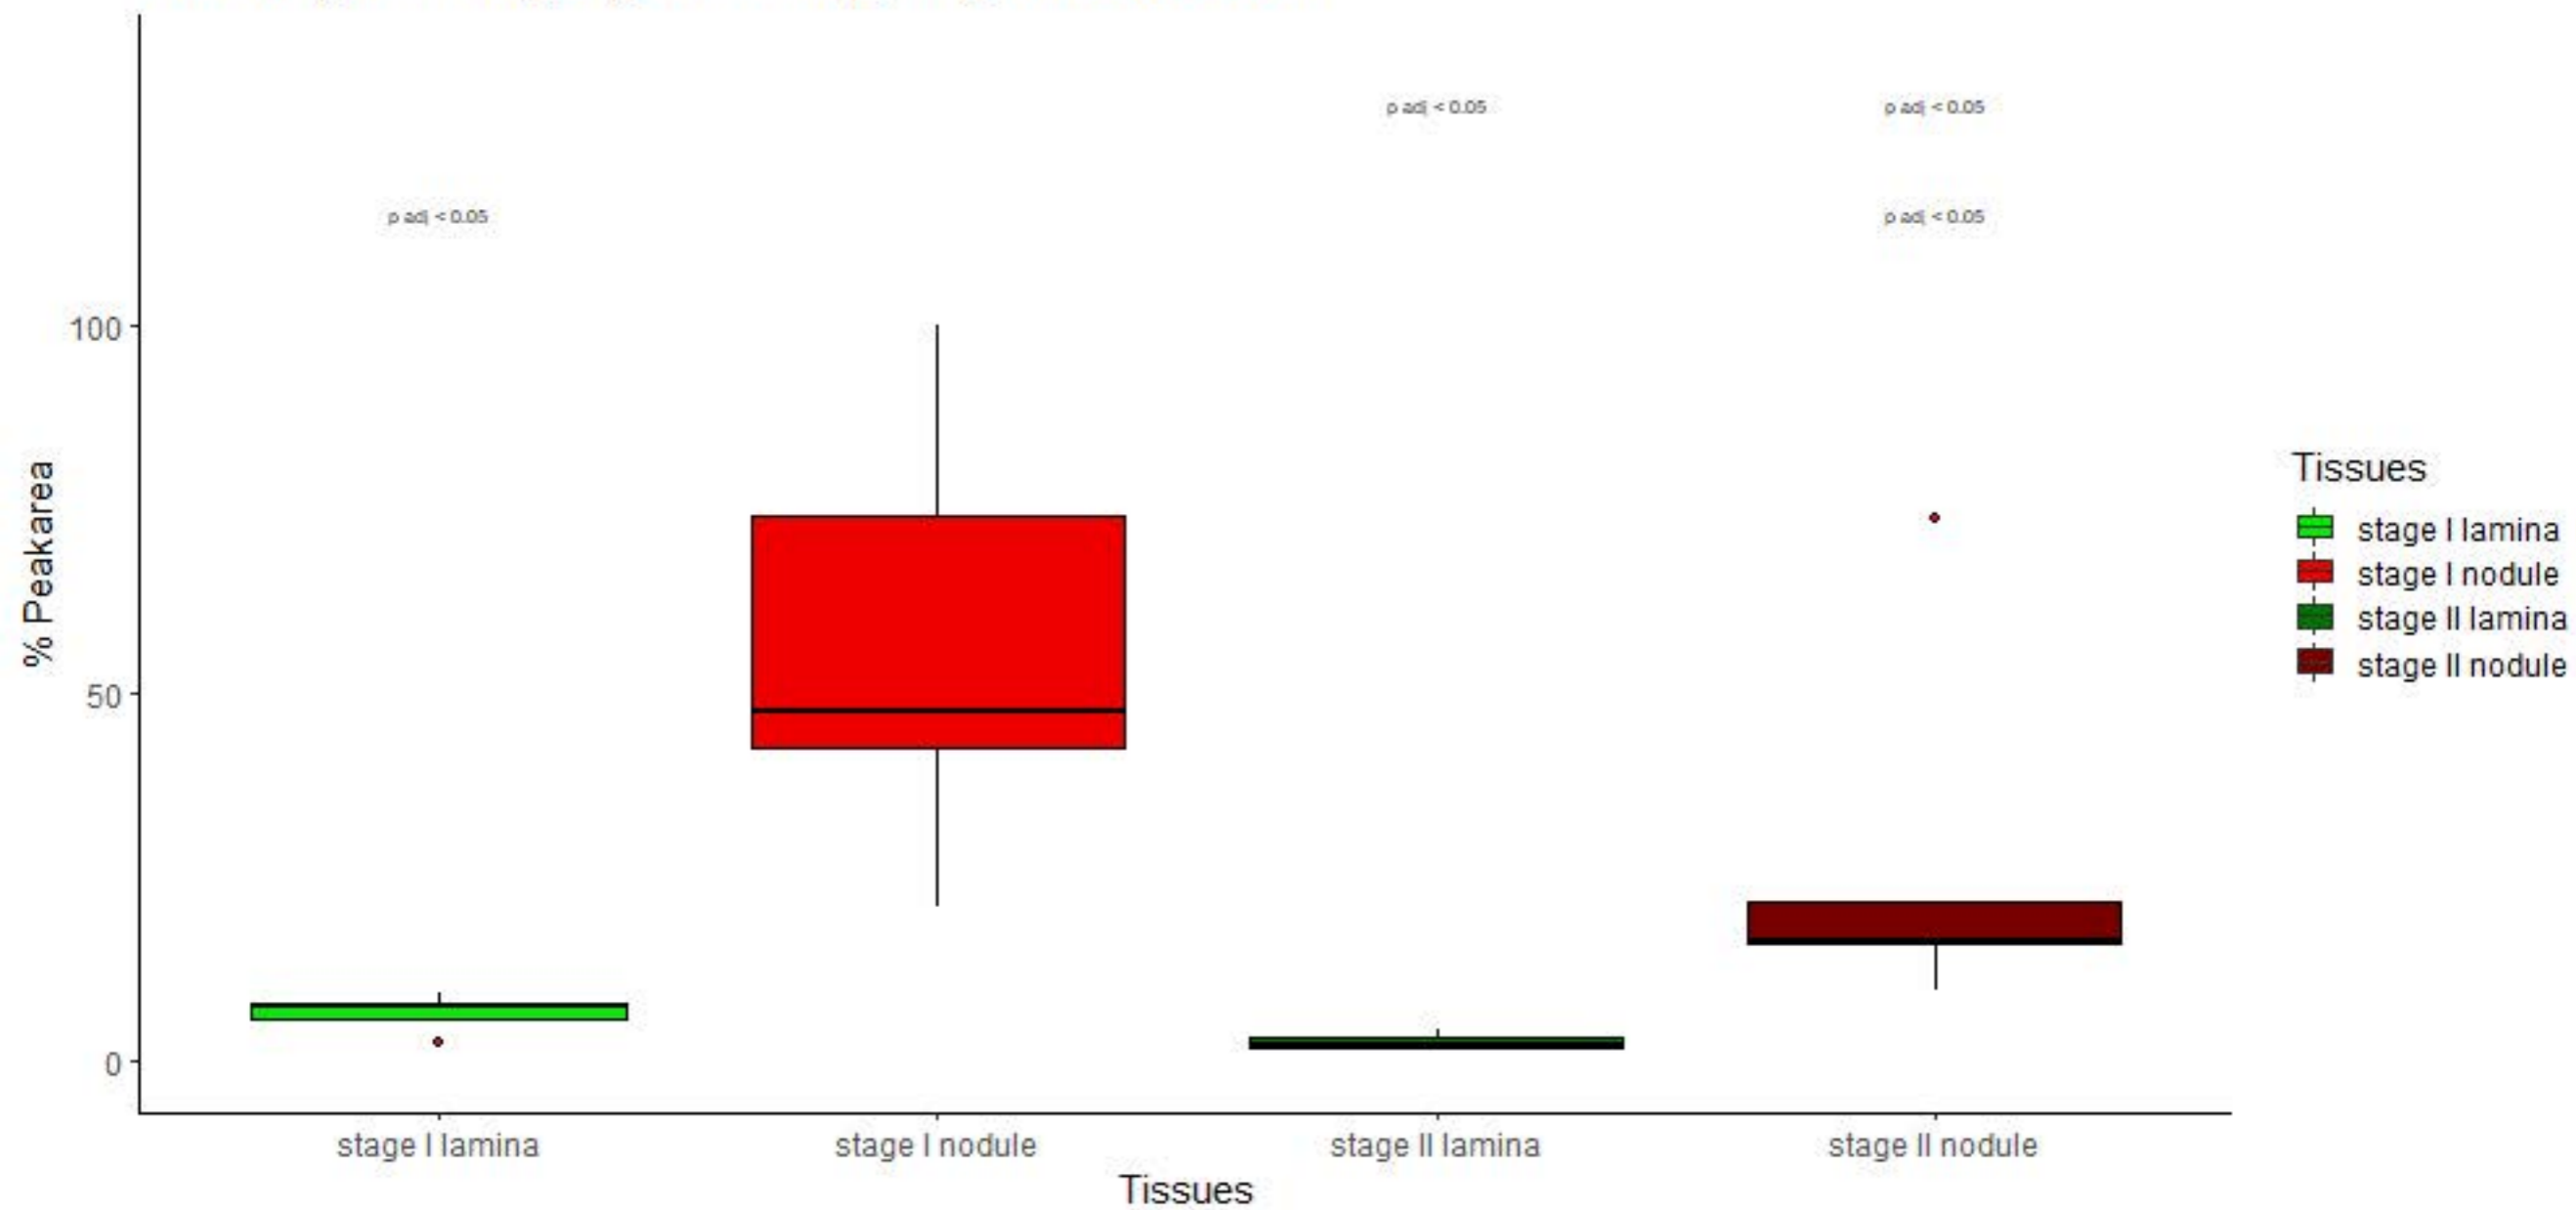



# Putative\_aminosugar\_RT:15.74\_min\_m/z:790.3464

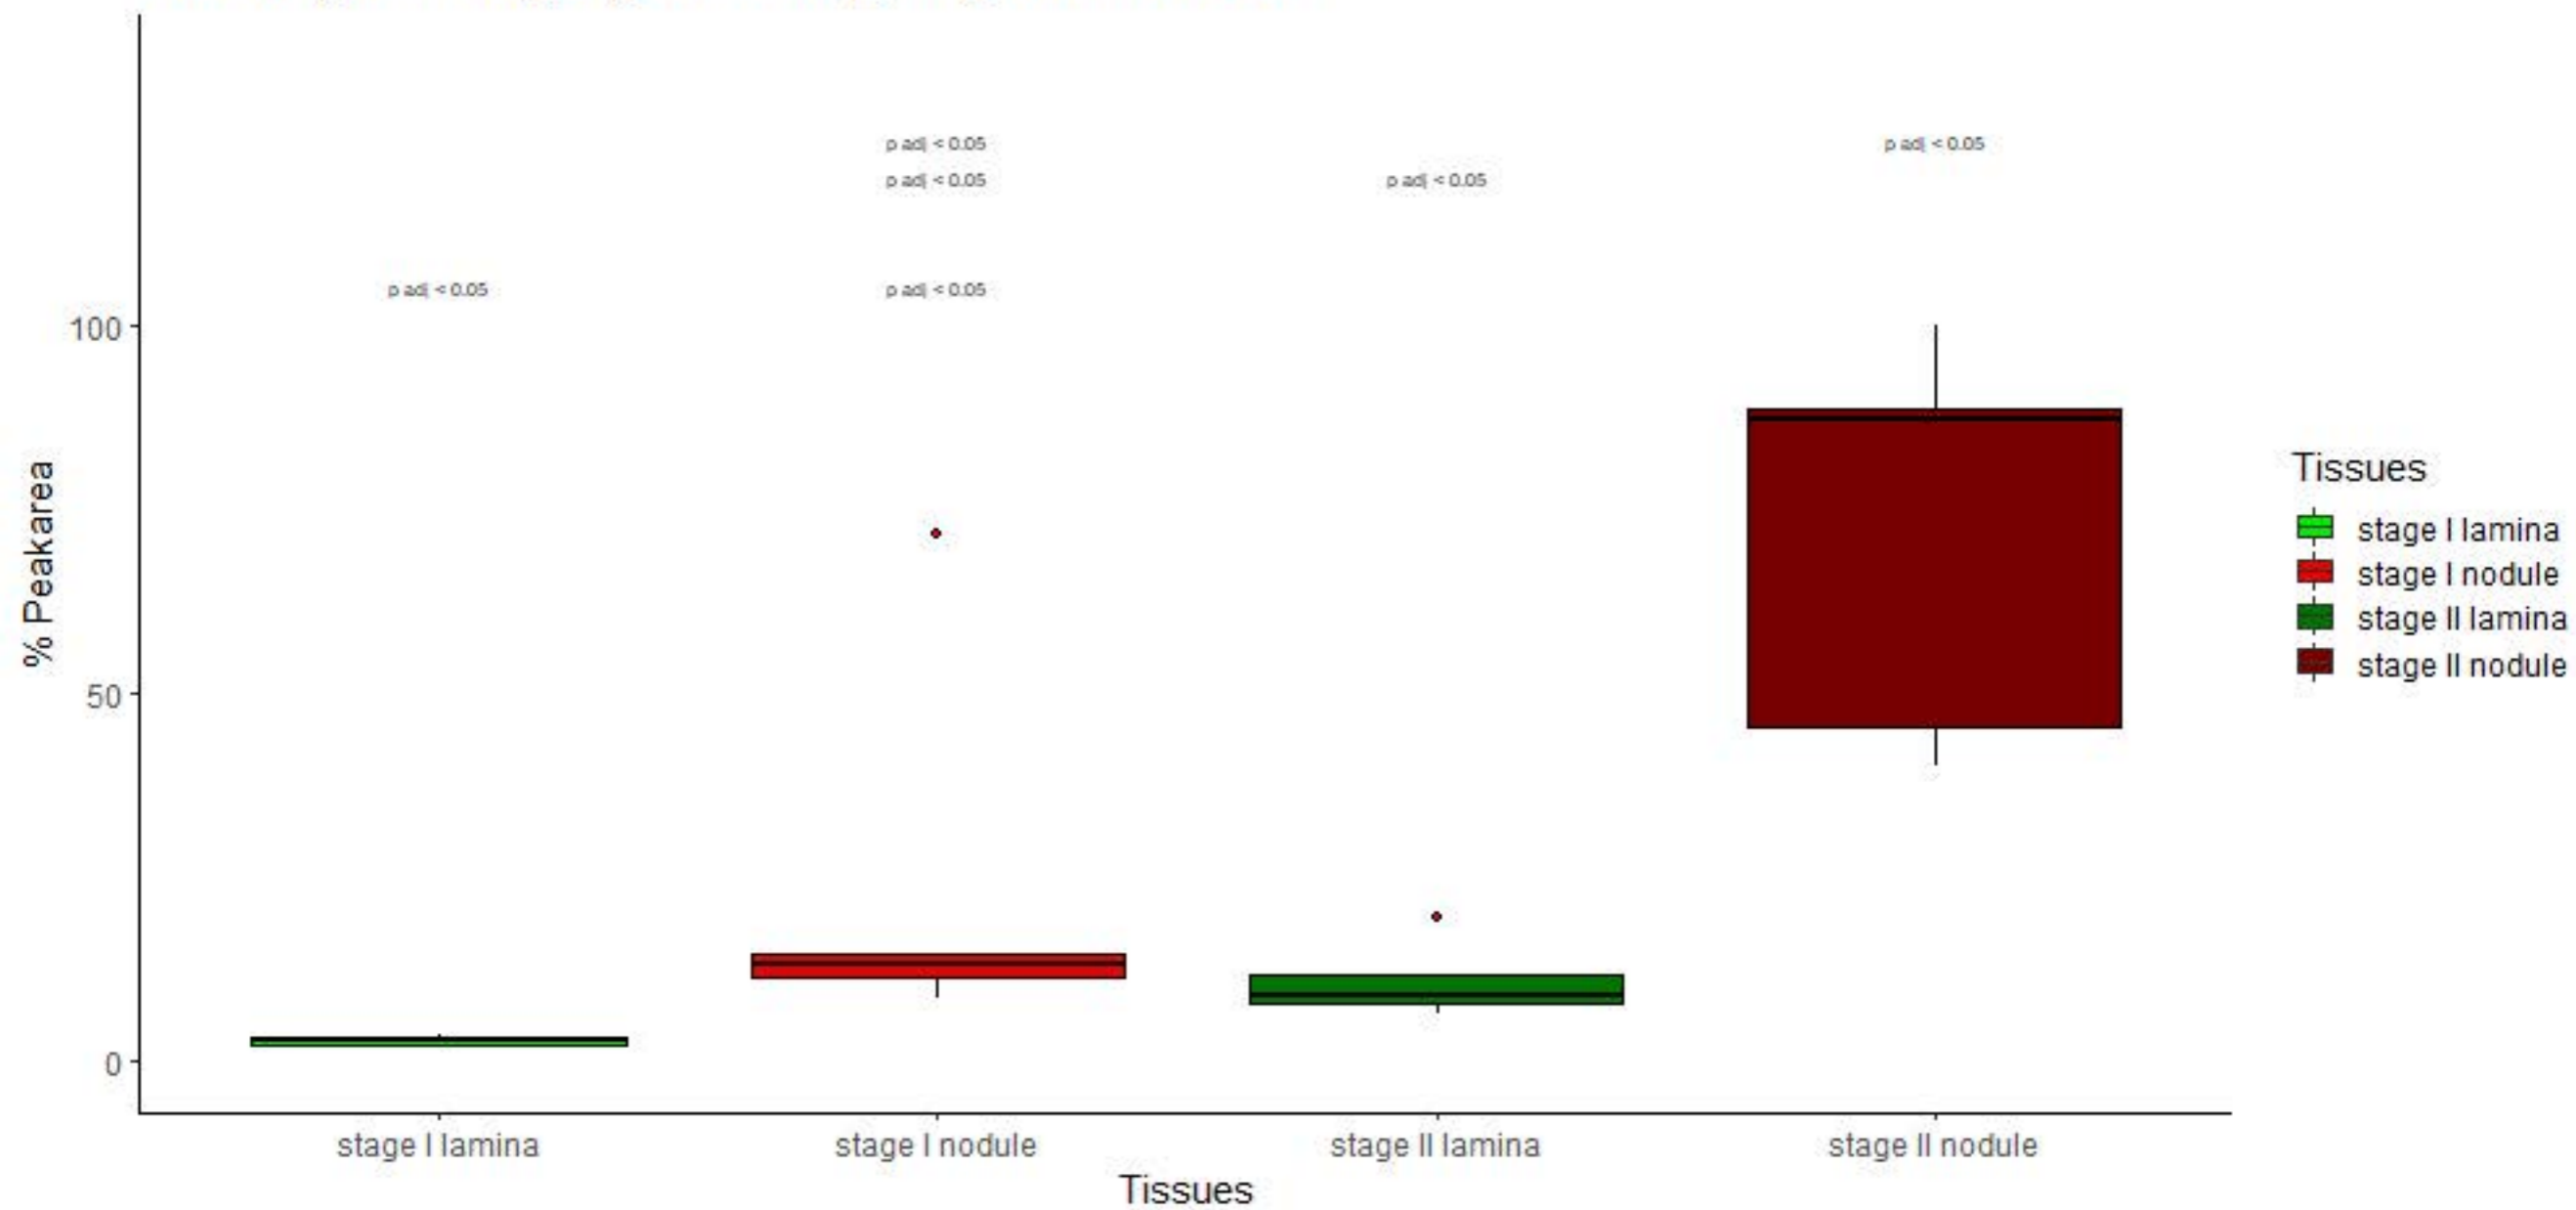

# Putative\_aminosugar\_RT:15.83\_min\_m/z:993.4261

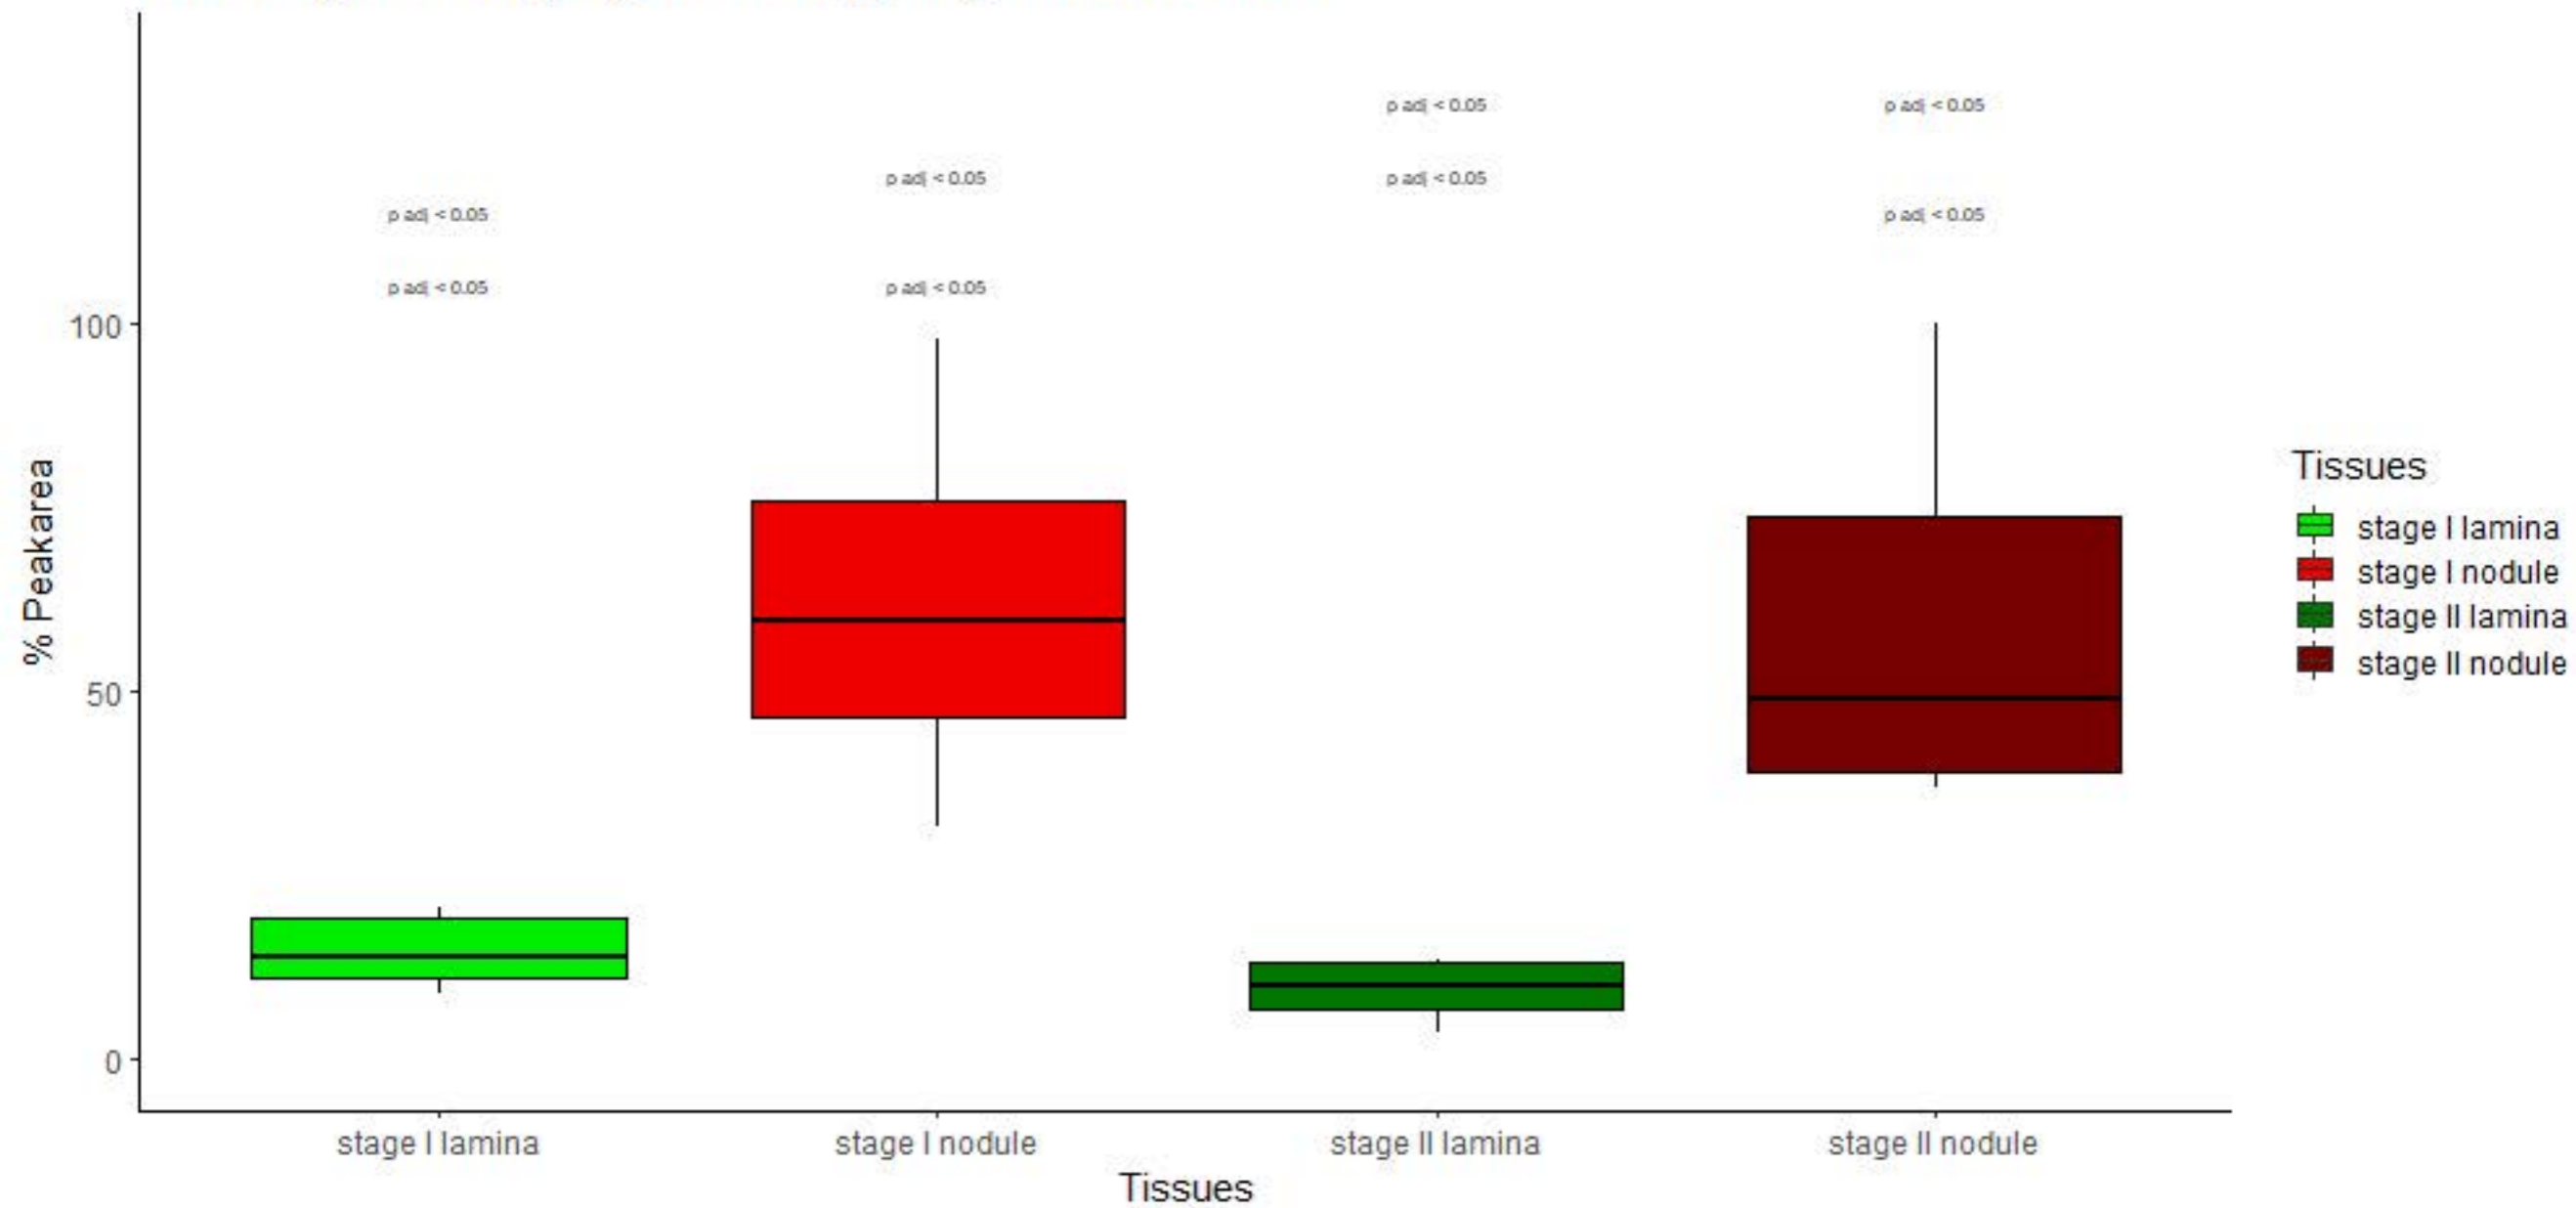

# Putative\_aminosugar\_RT:16.29\_min\_m/z:476.1871

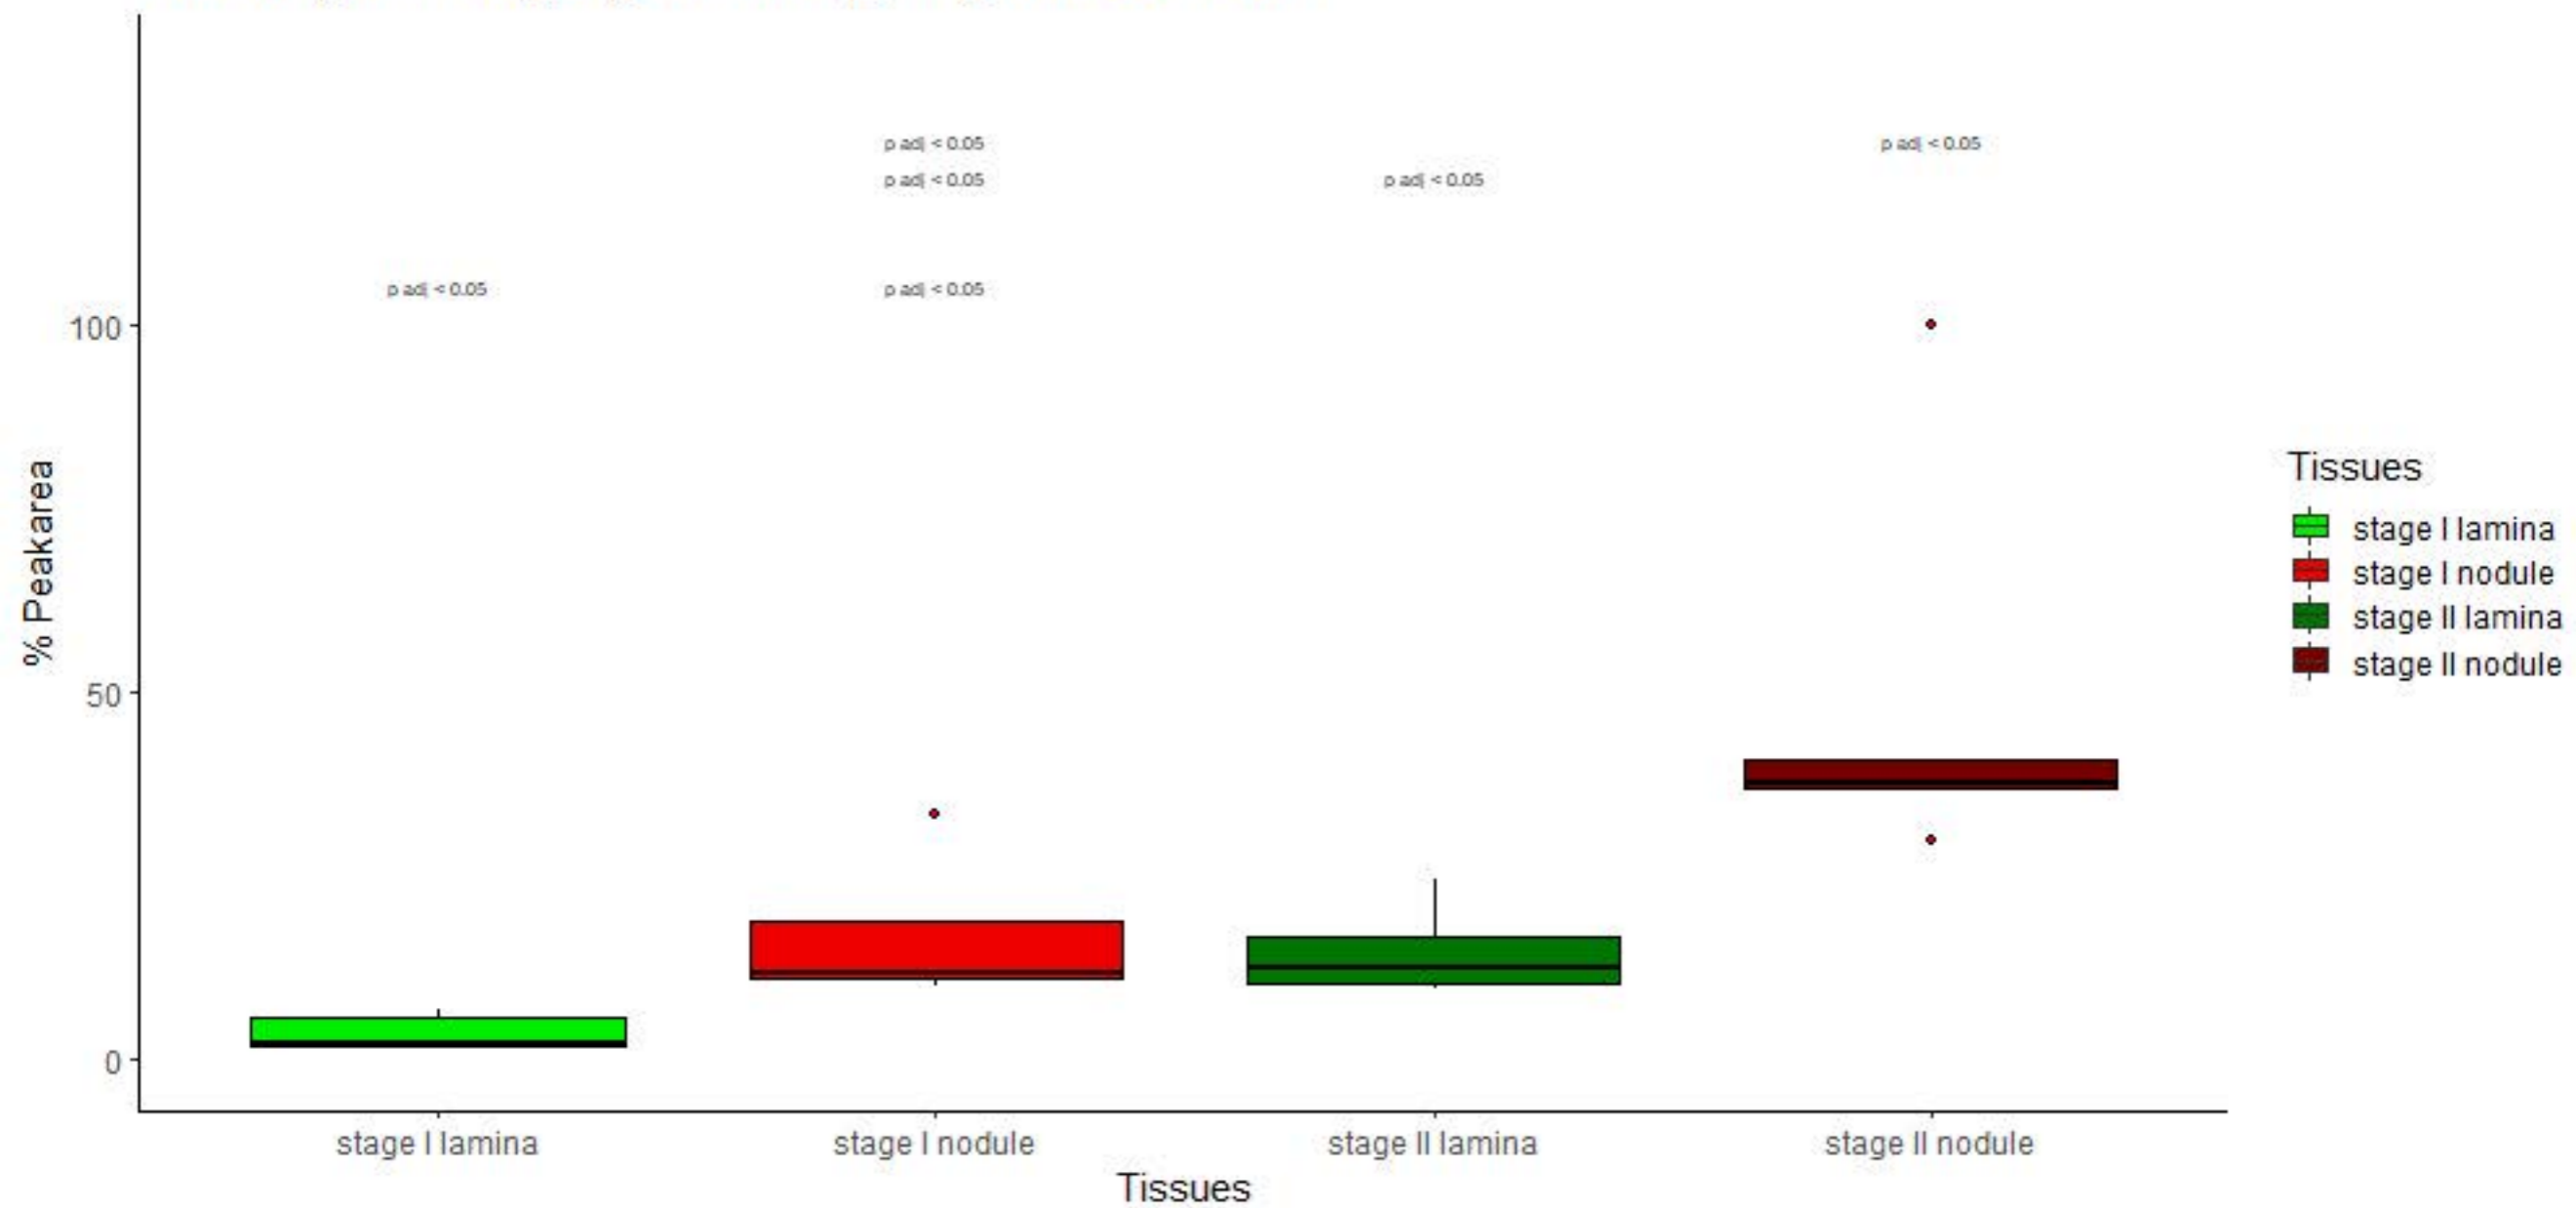

# Putative\_aminosugar\_RT:16.36\_min\_m/z:679.2664

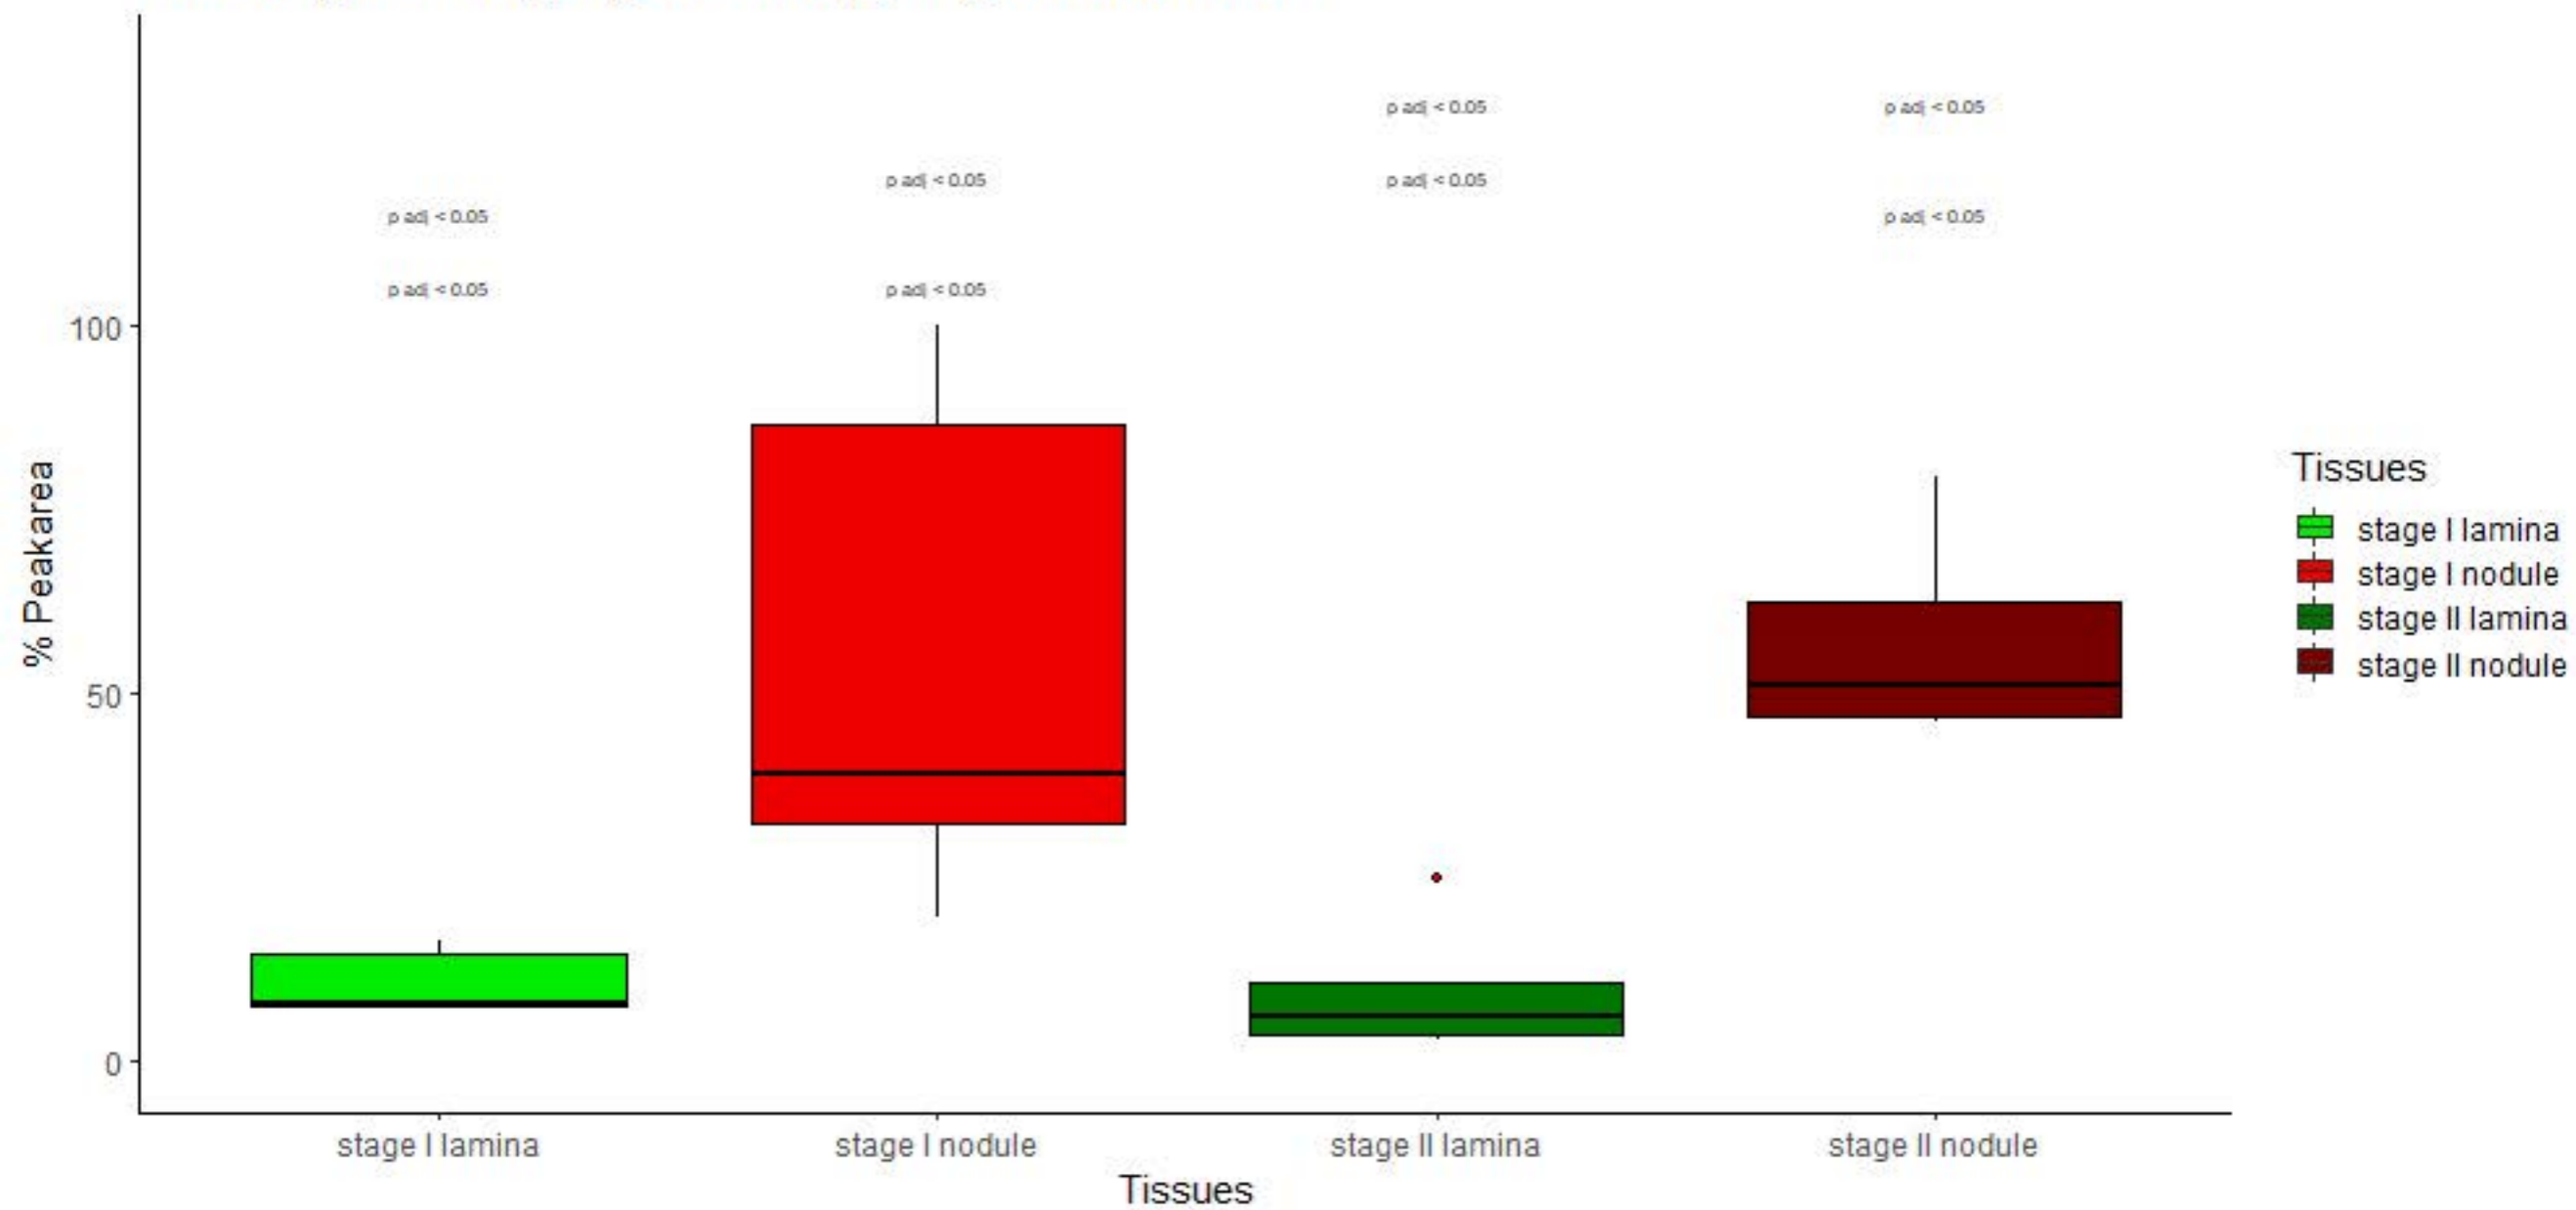

# ART Boric-acid

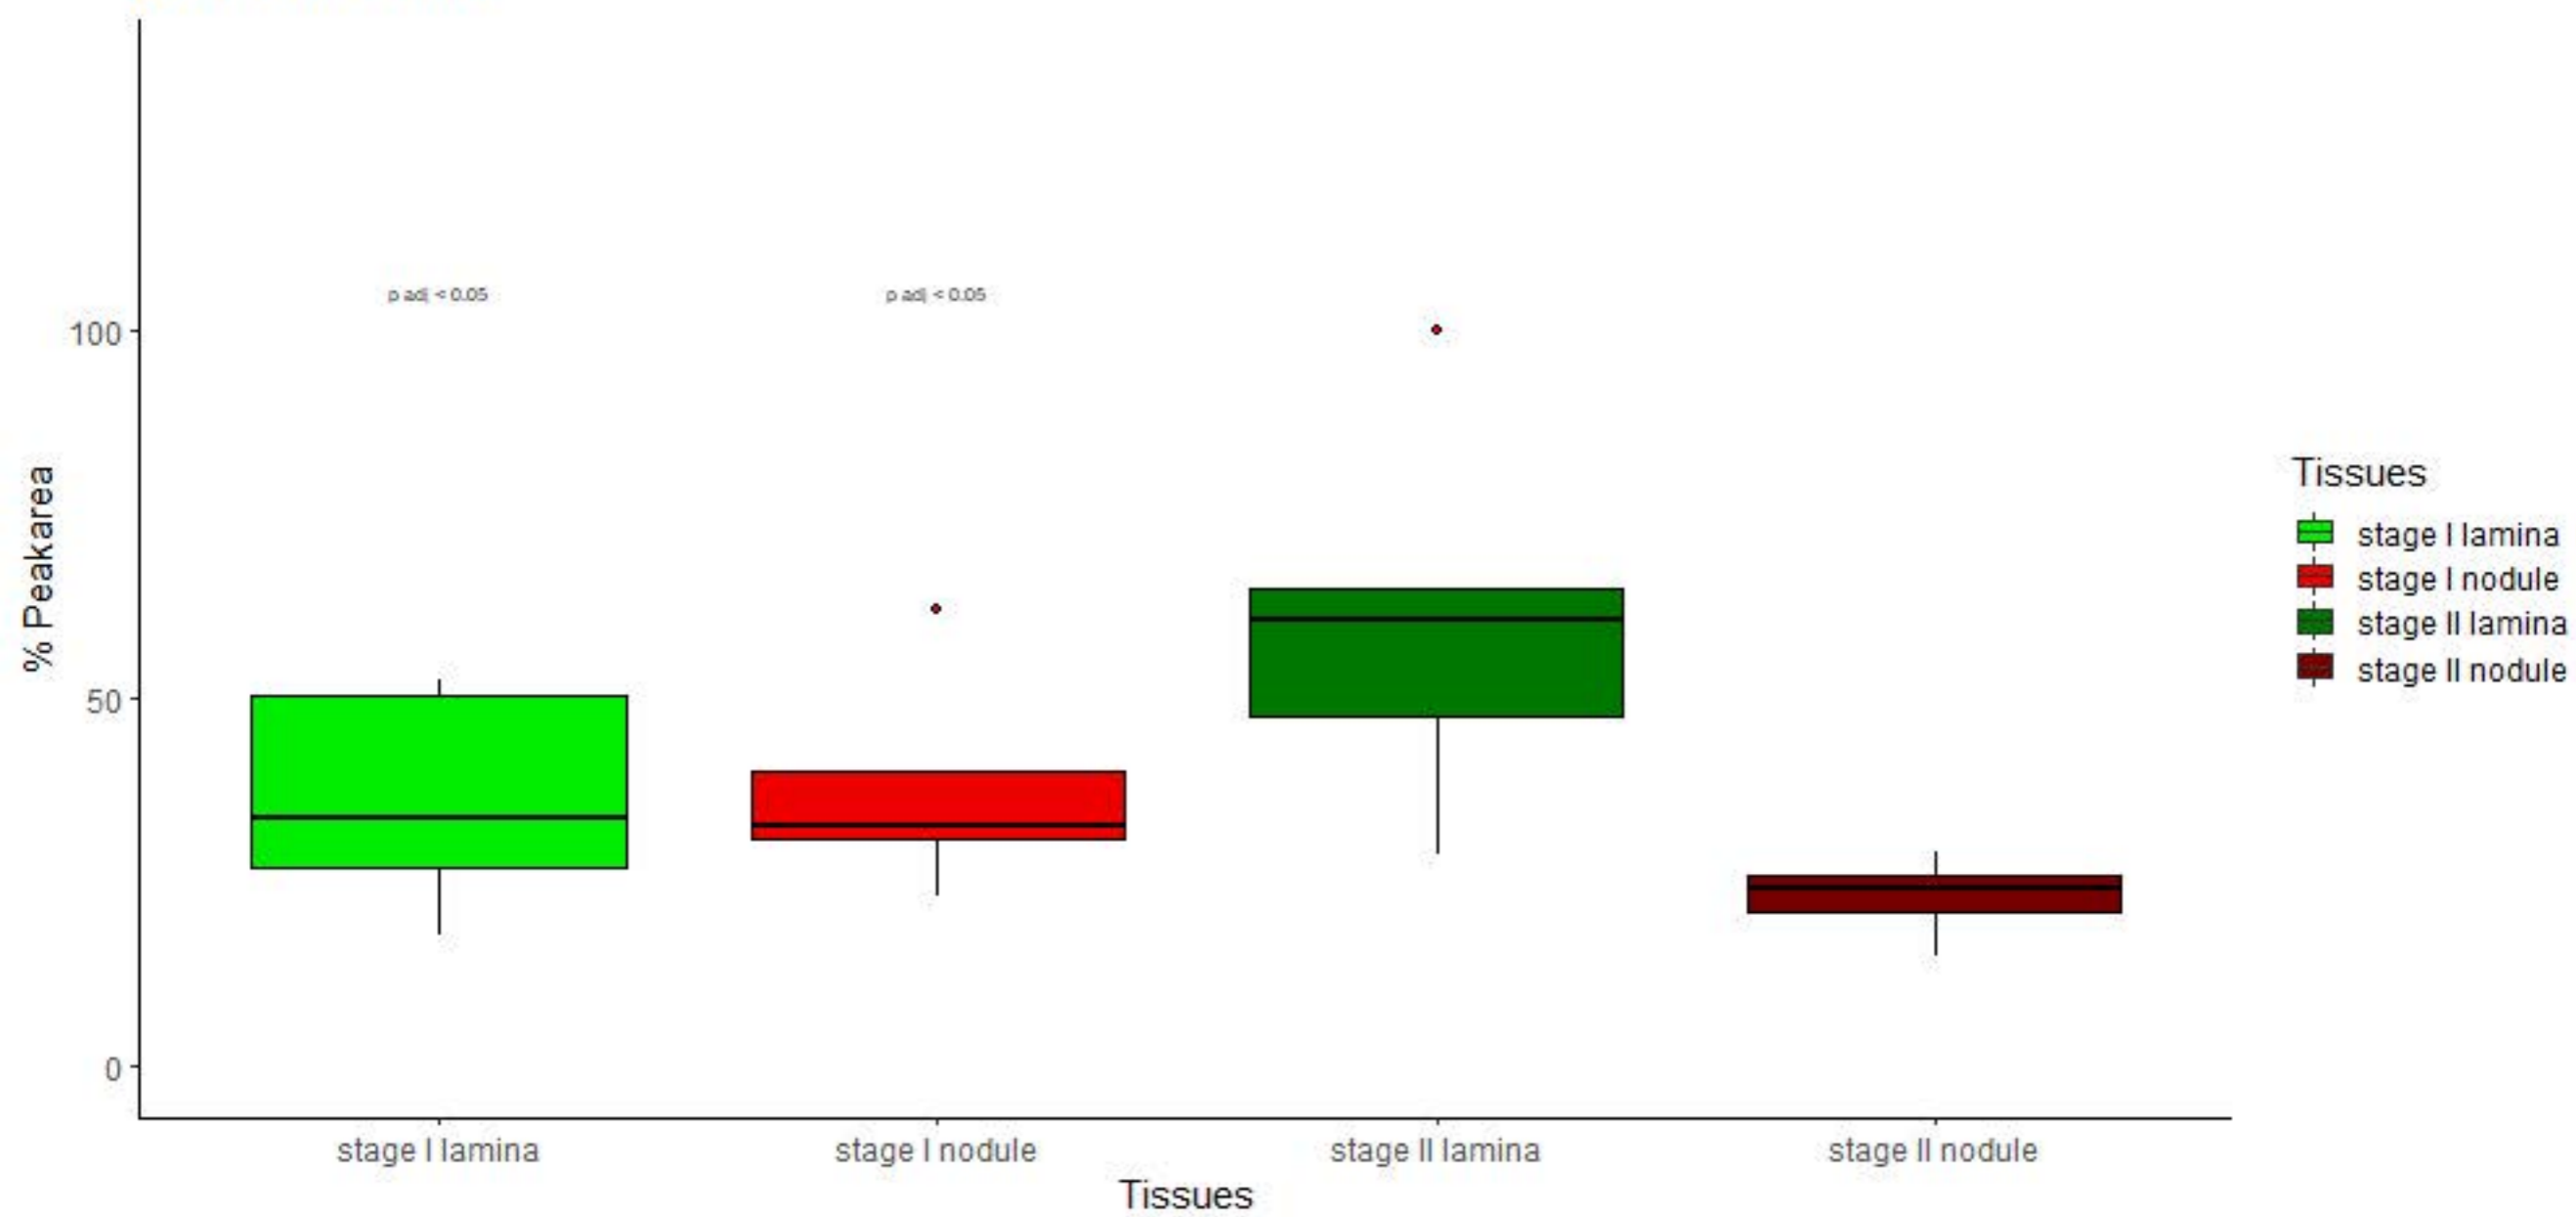

# Phosphoric acid

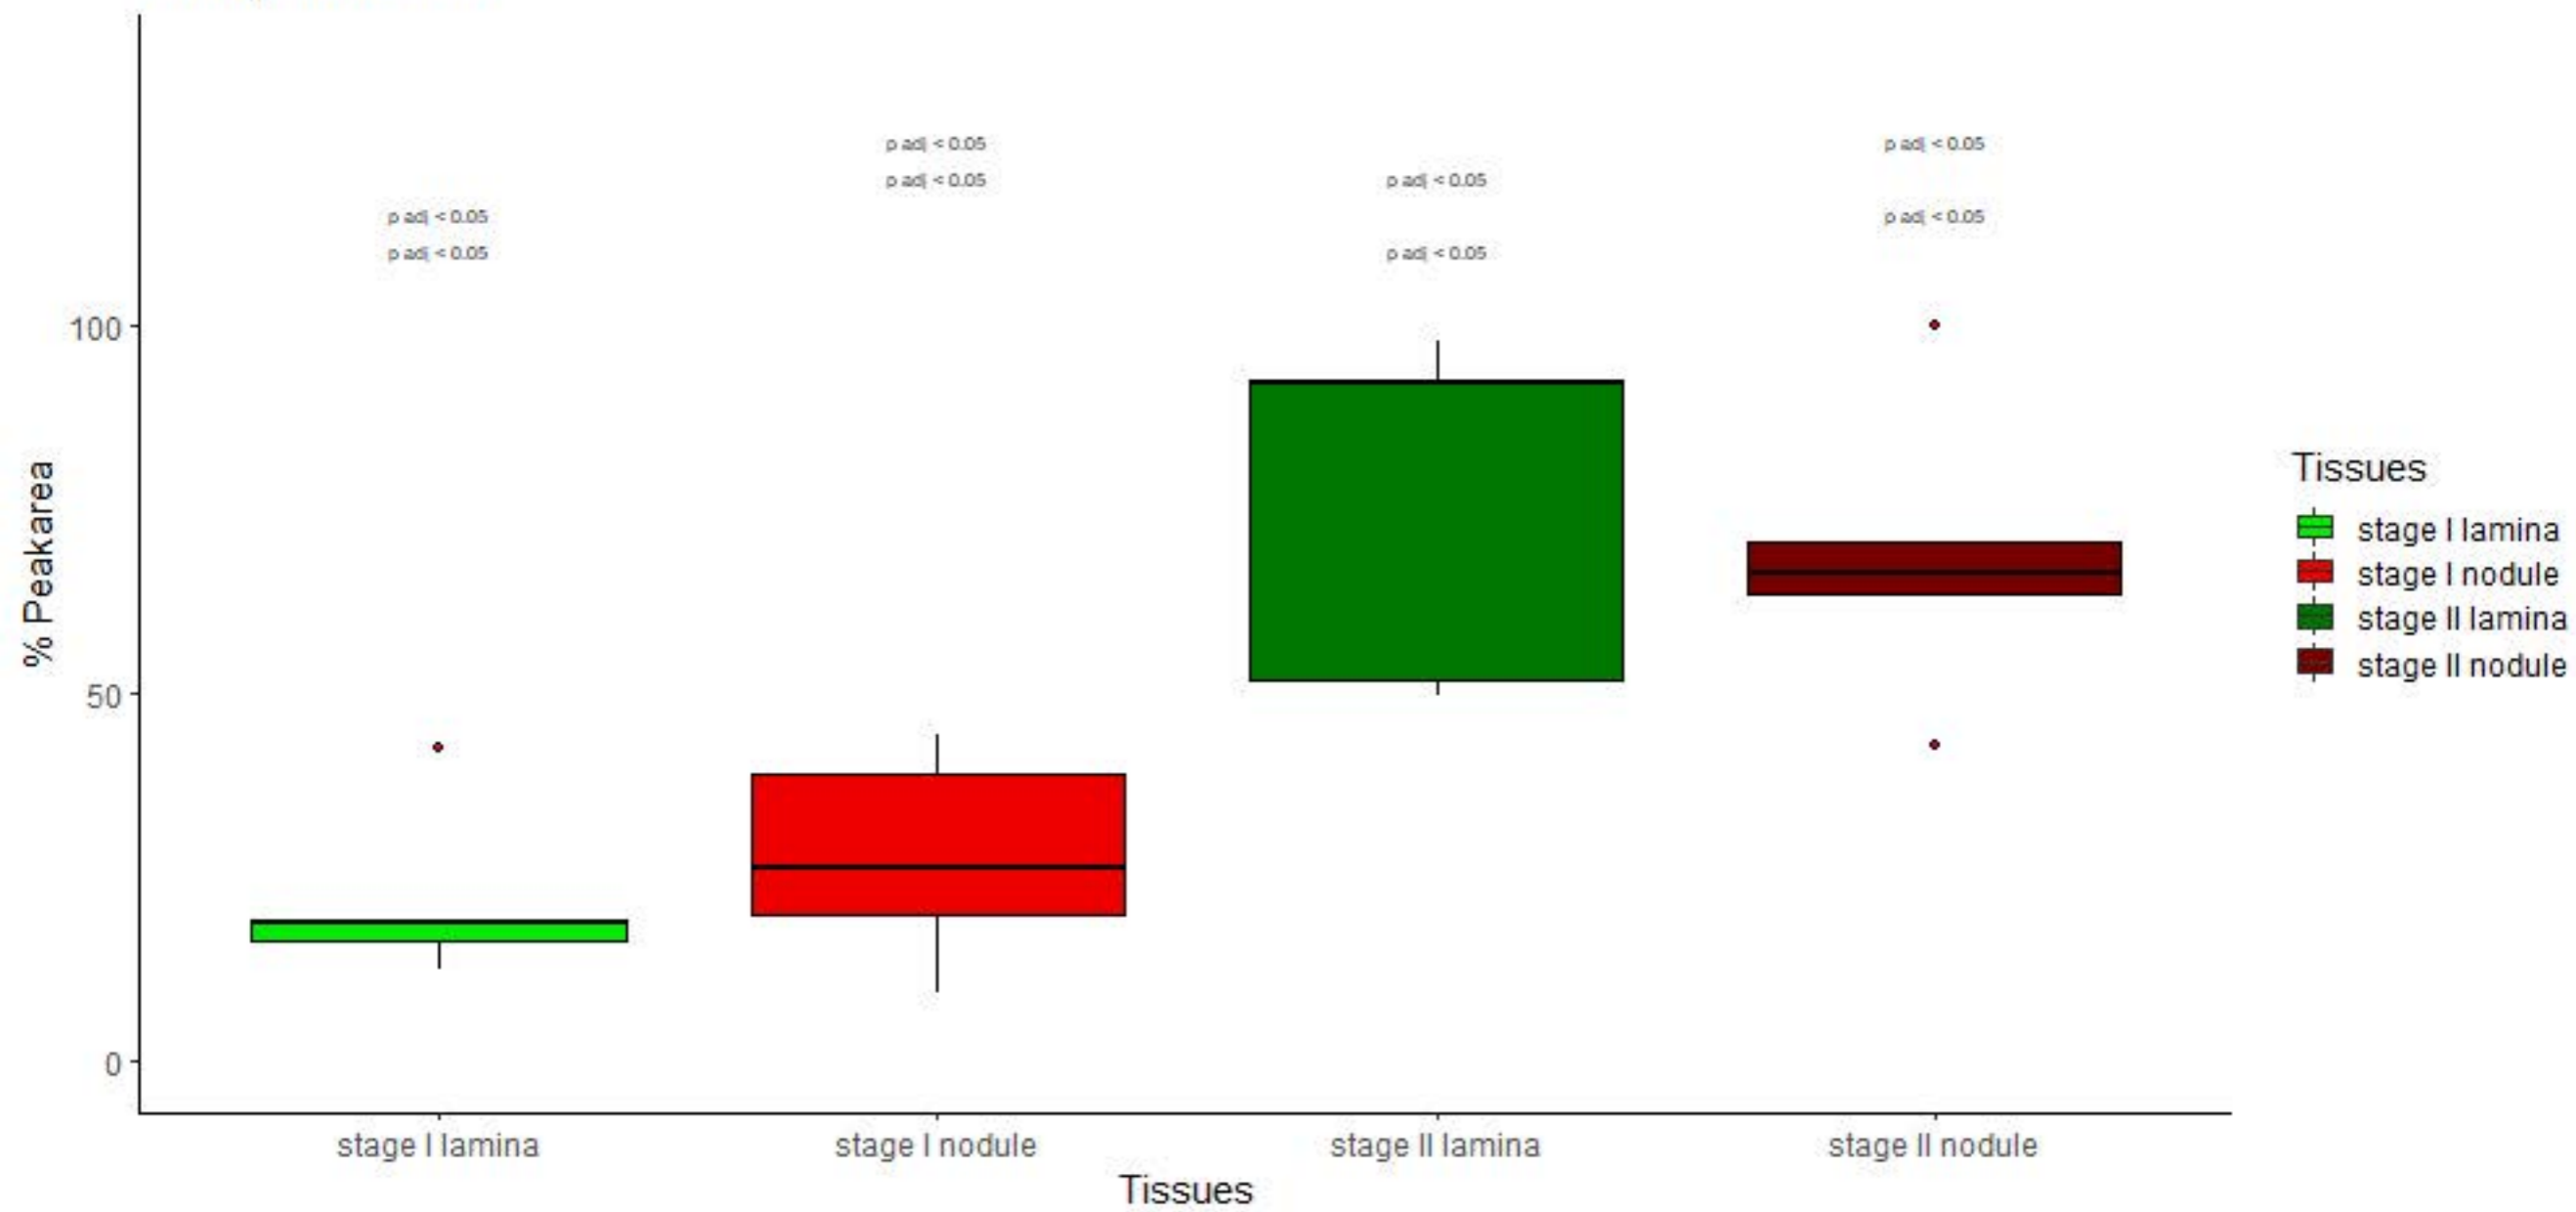

# ART Hydroxylamine

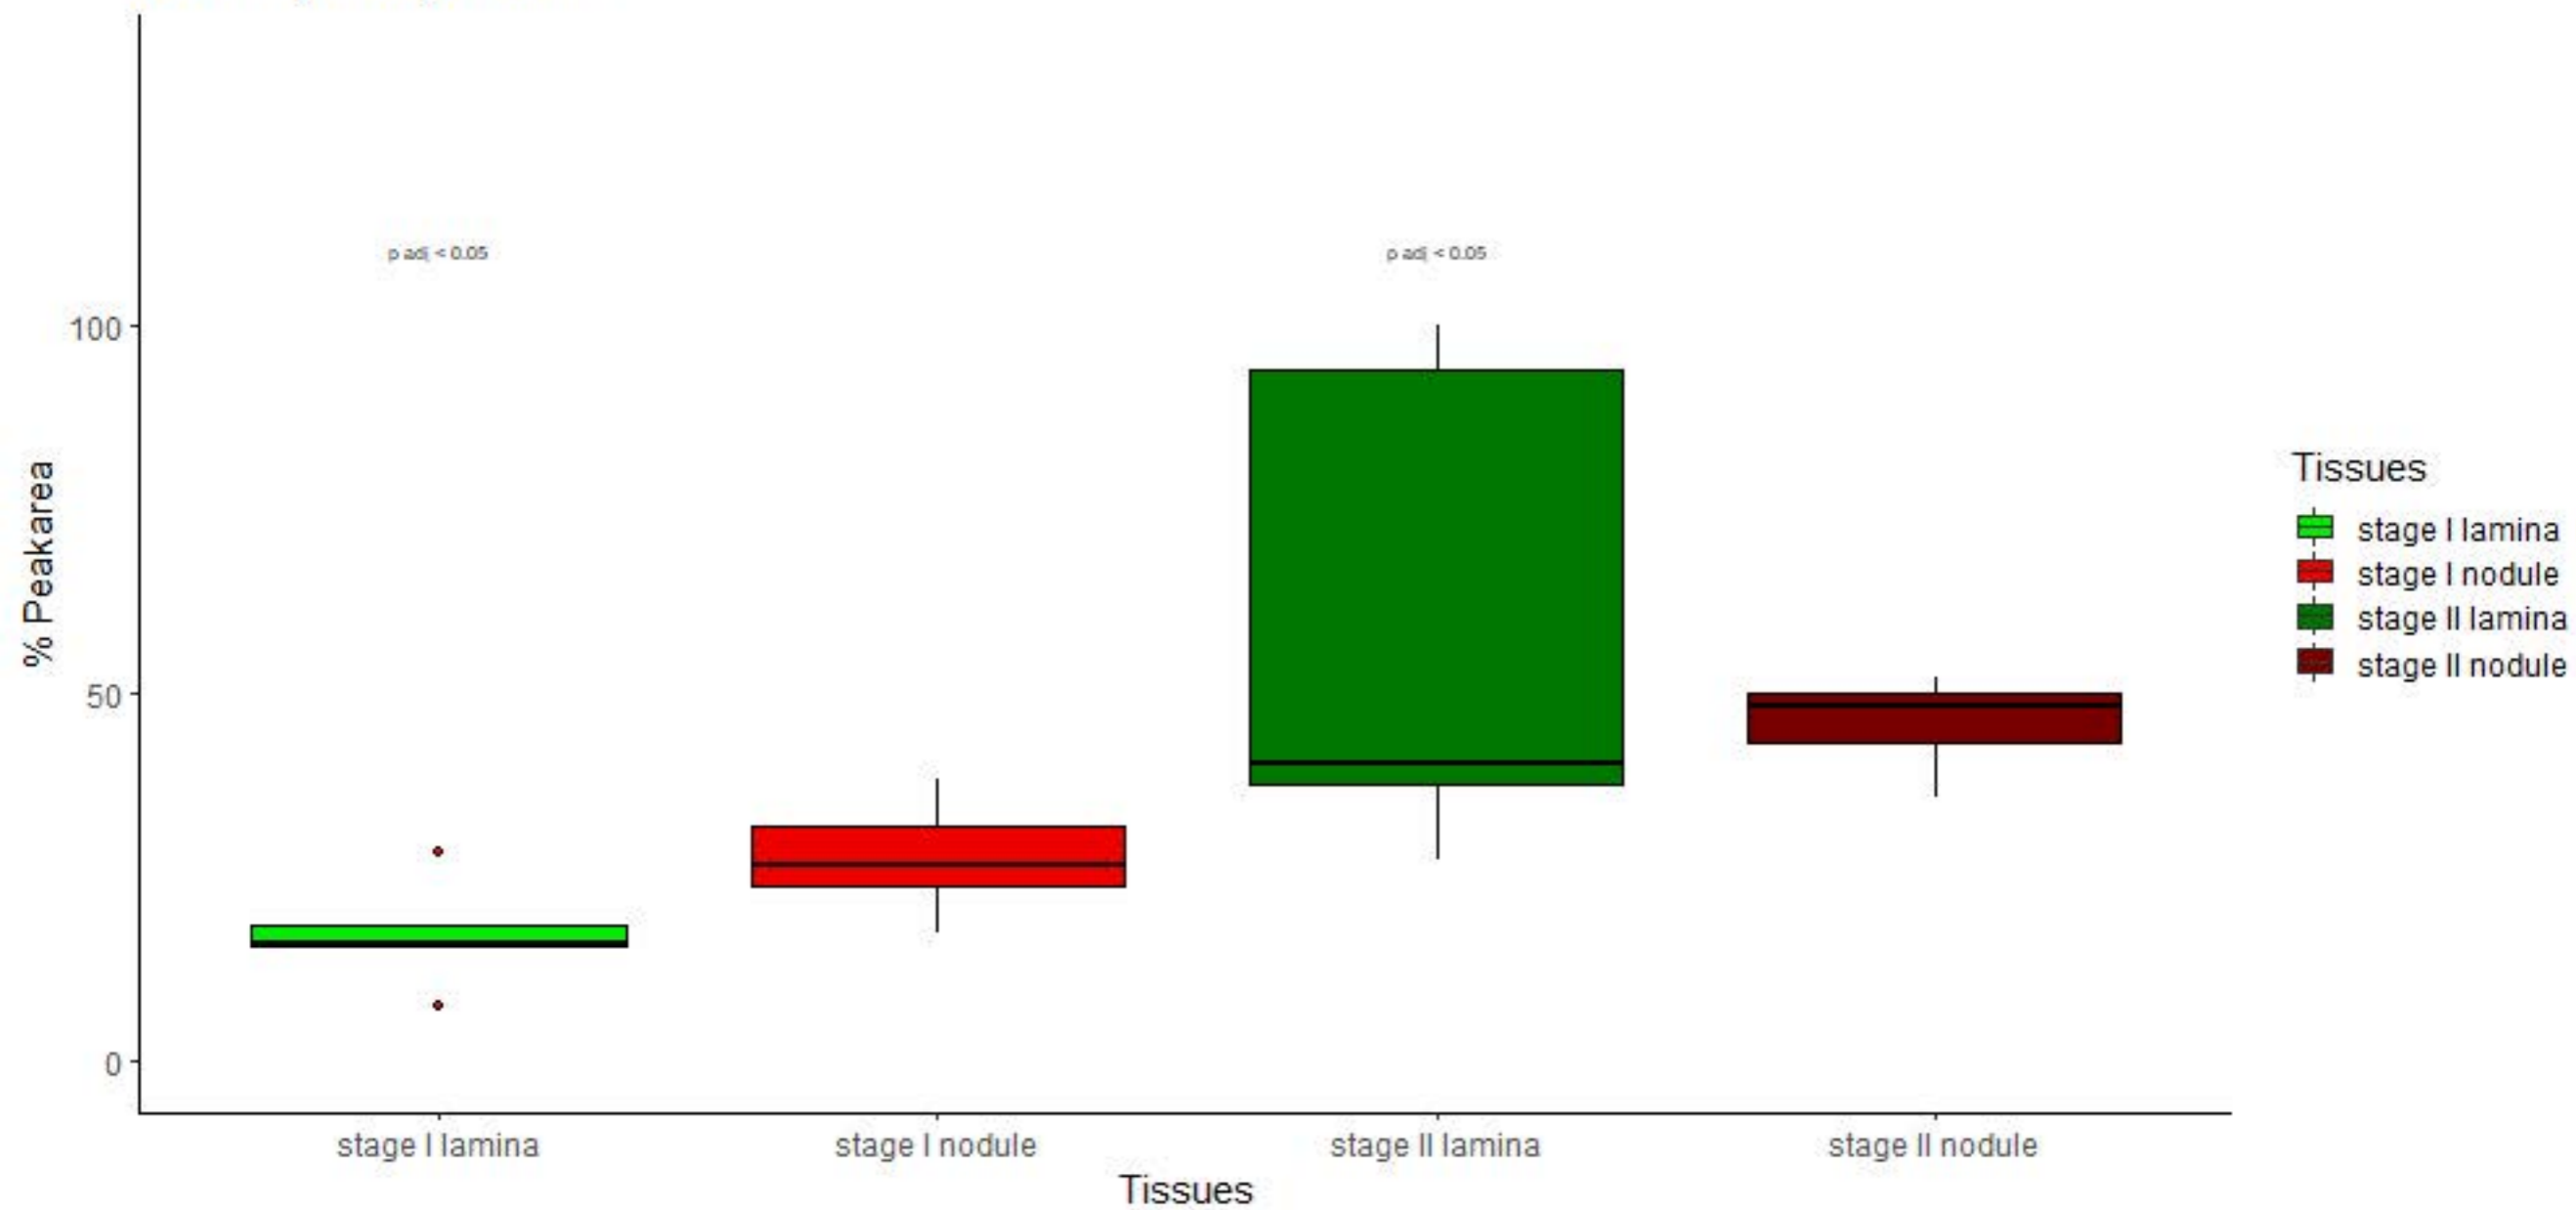

# Pyruvic acid

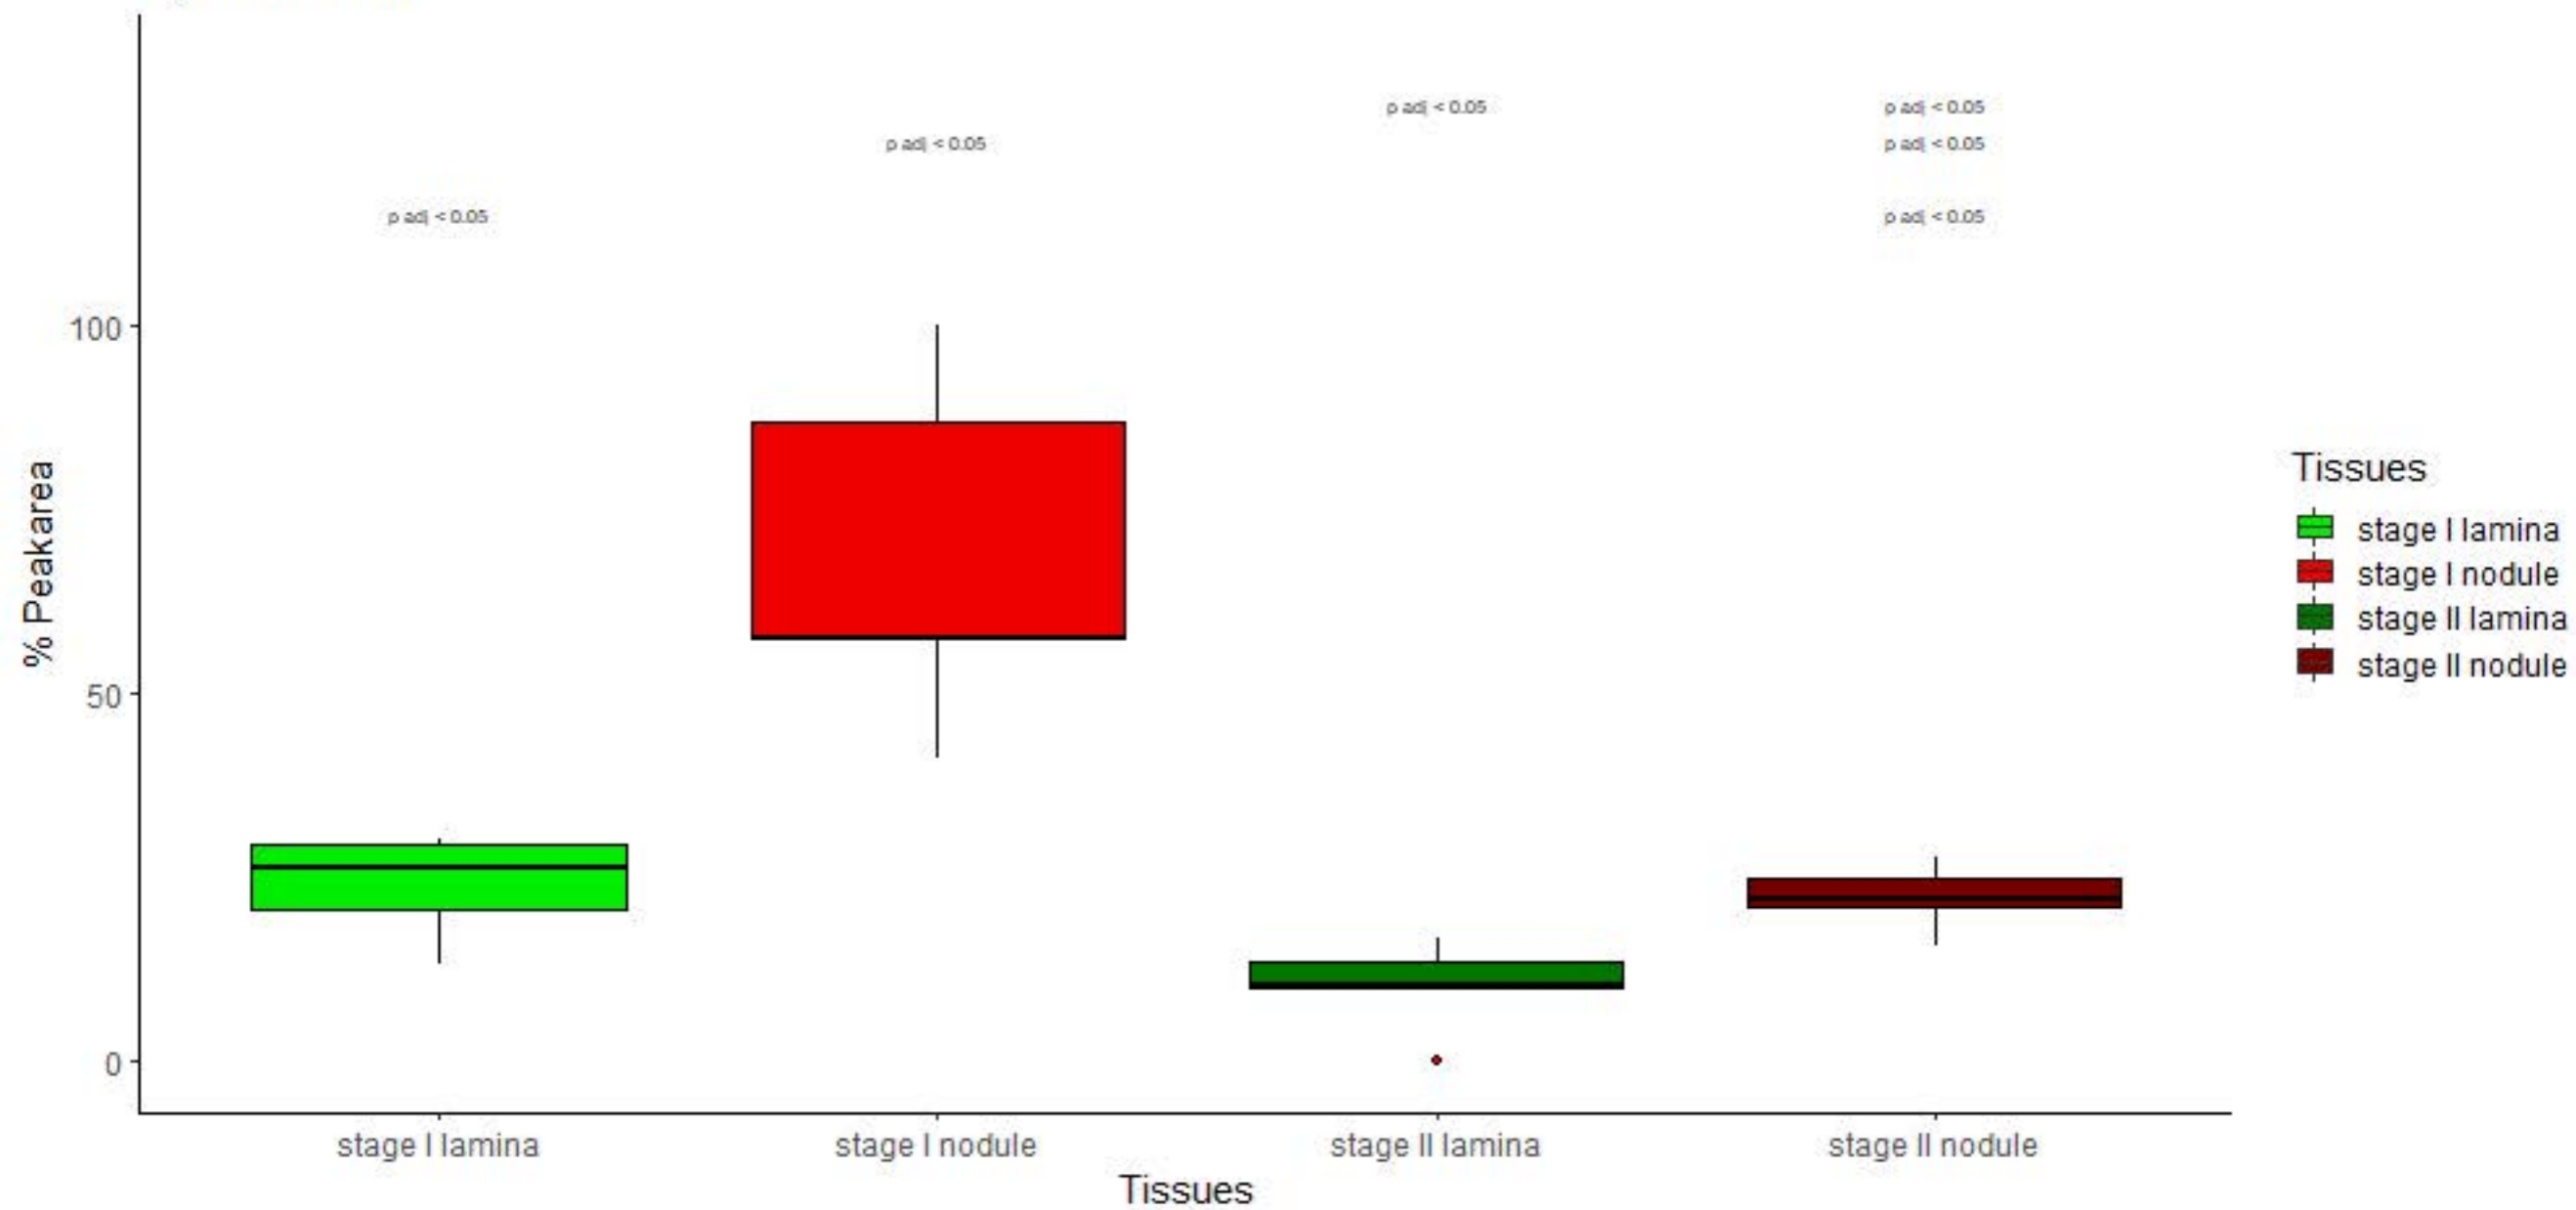



# Lactic acid

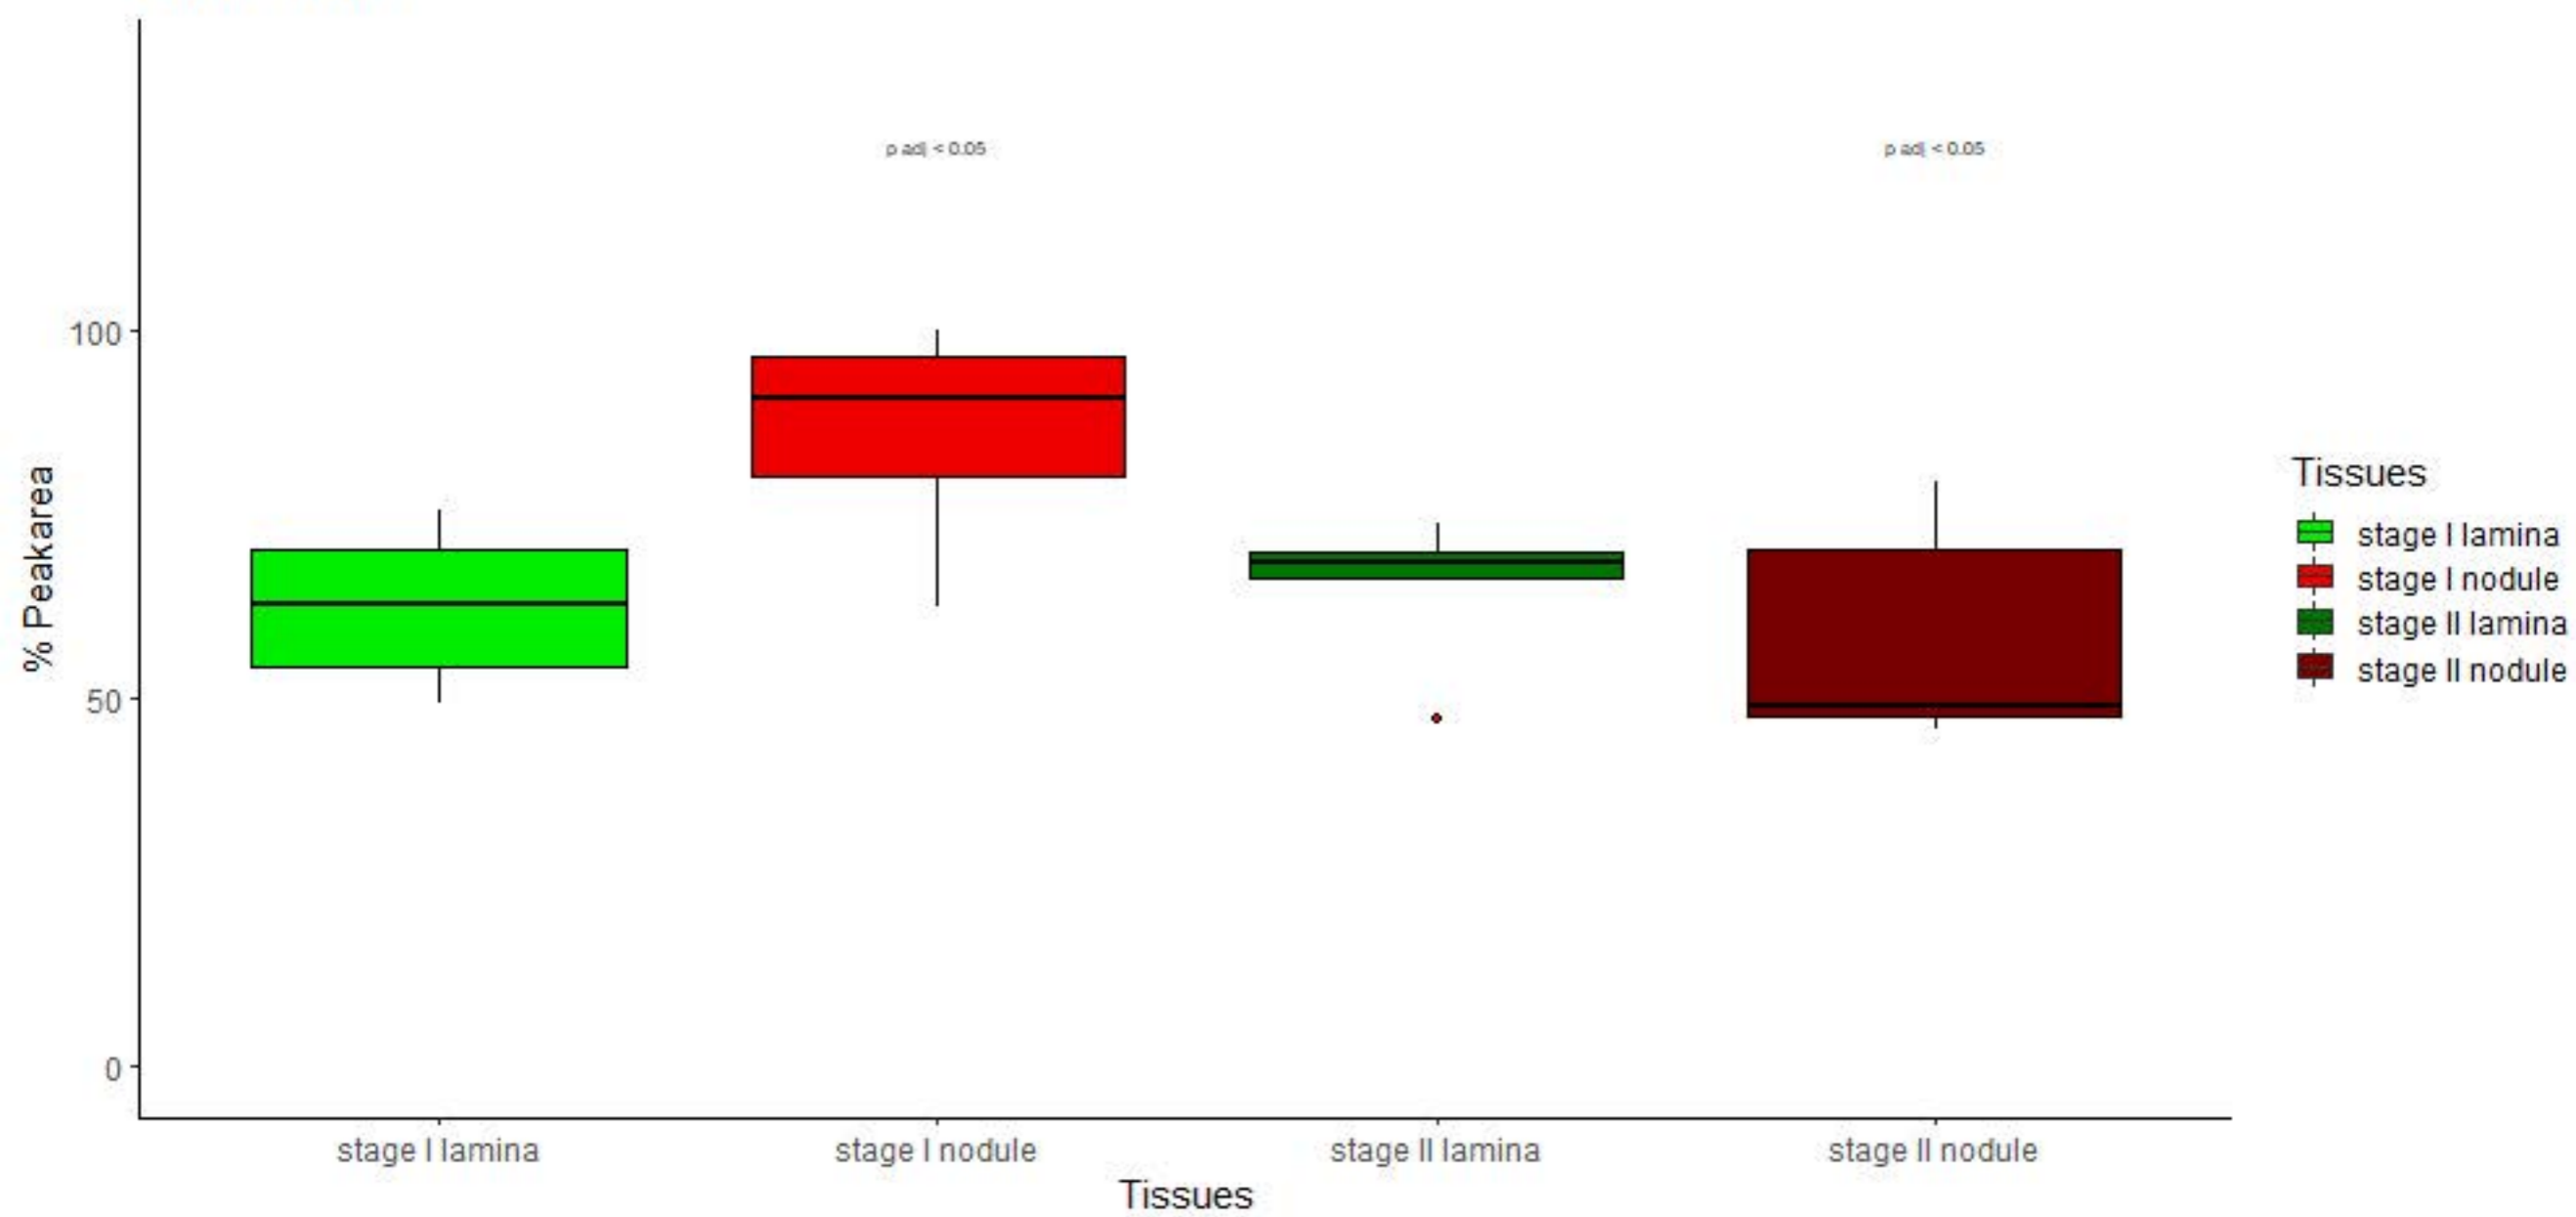

# Succinic acid

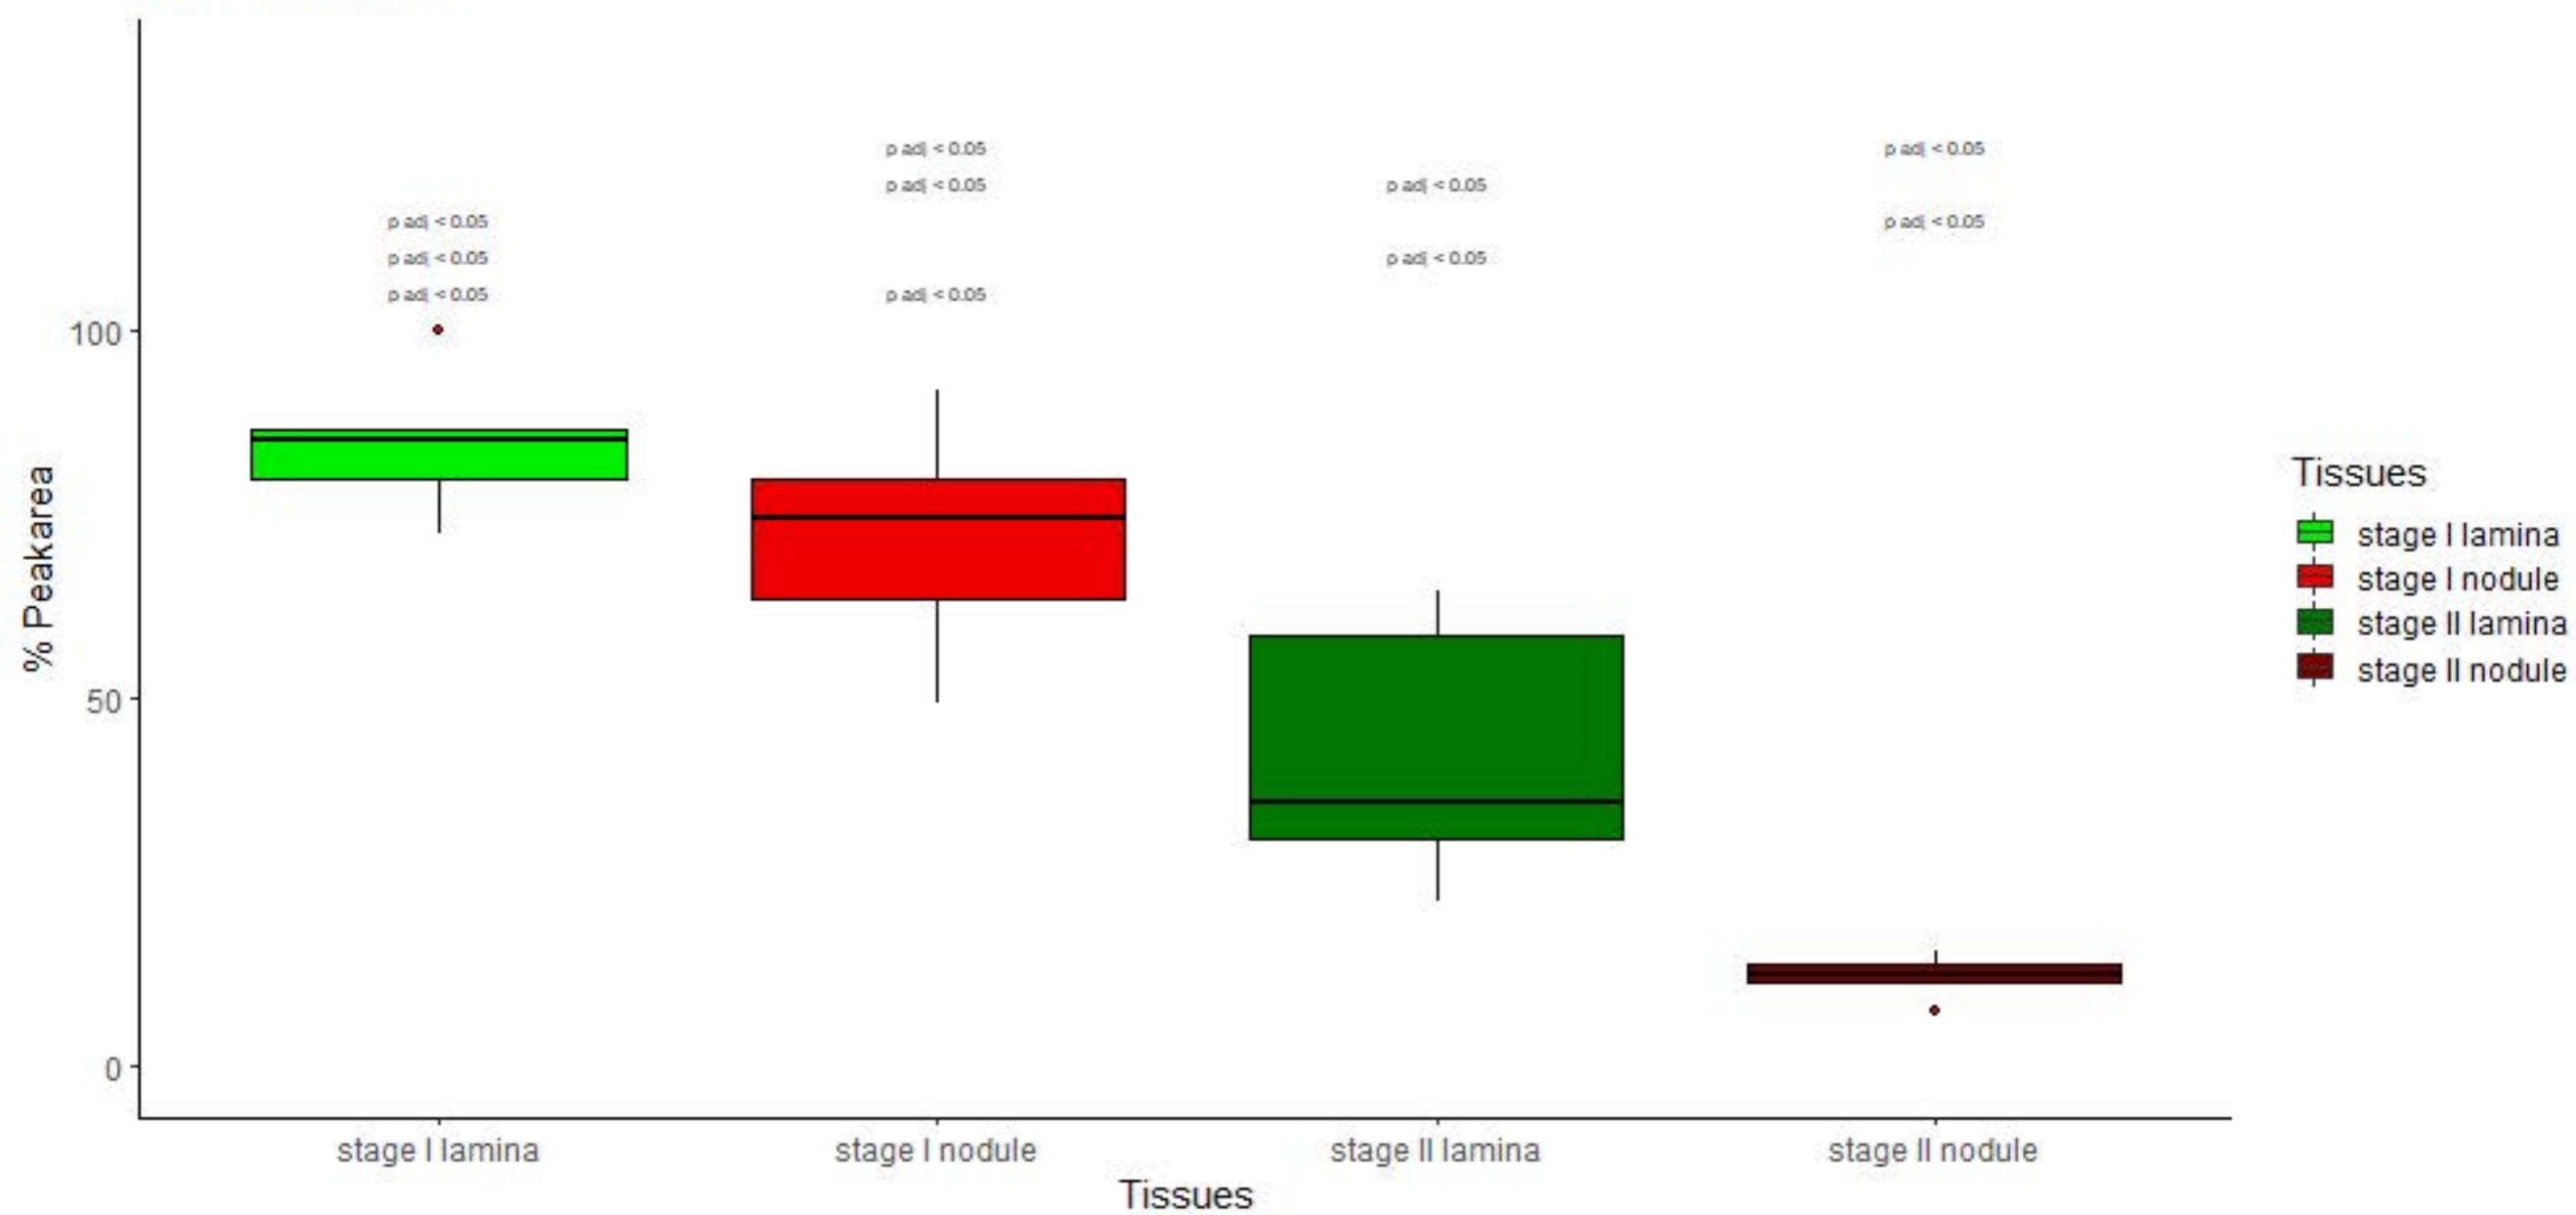

# Maleic acid

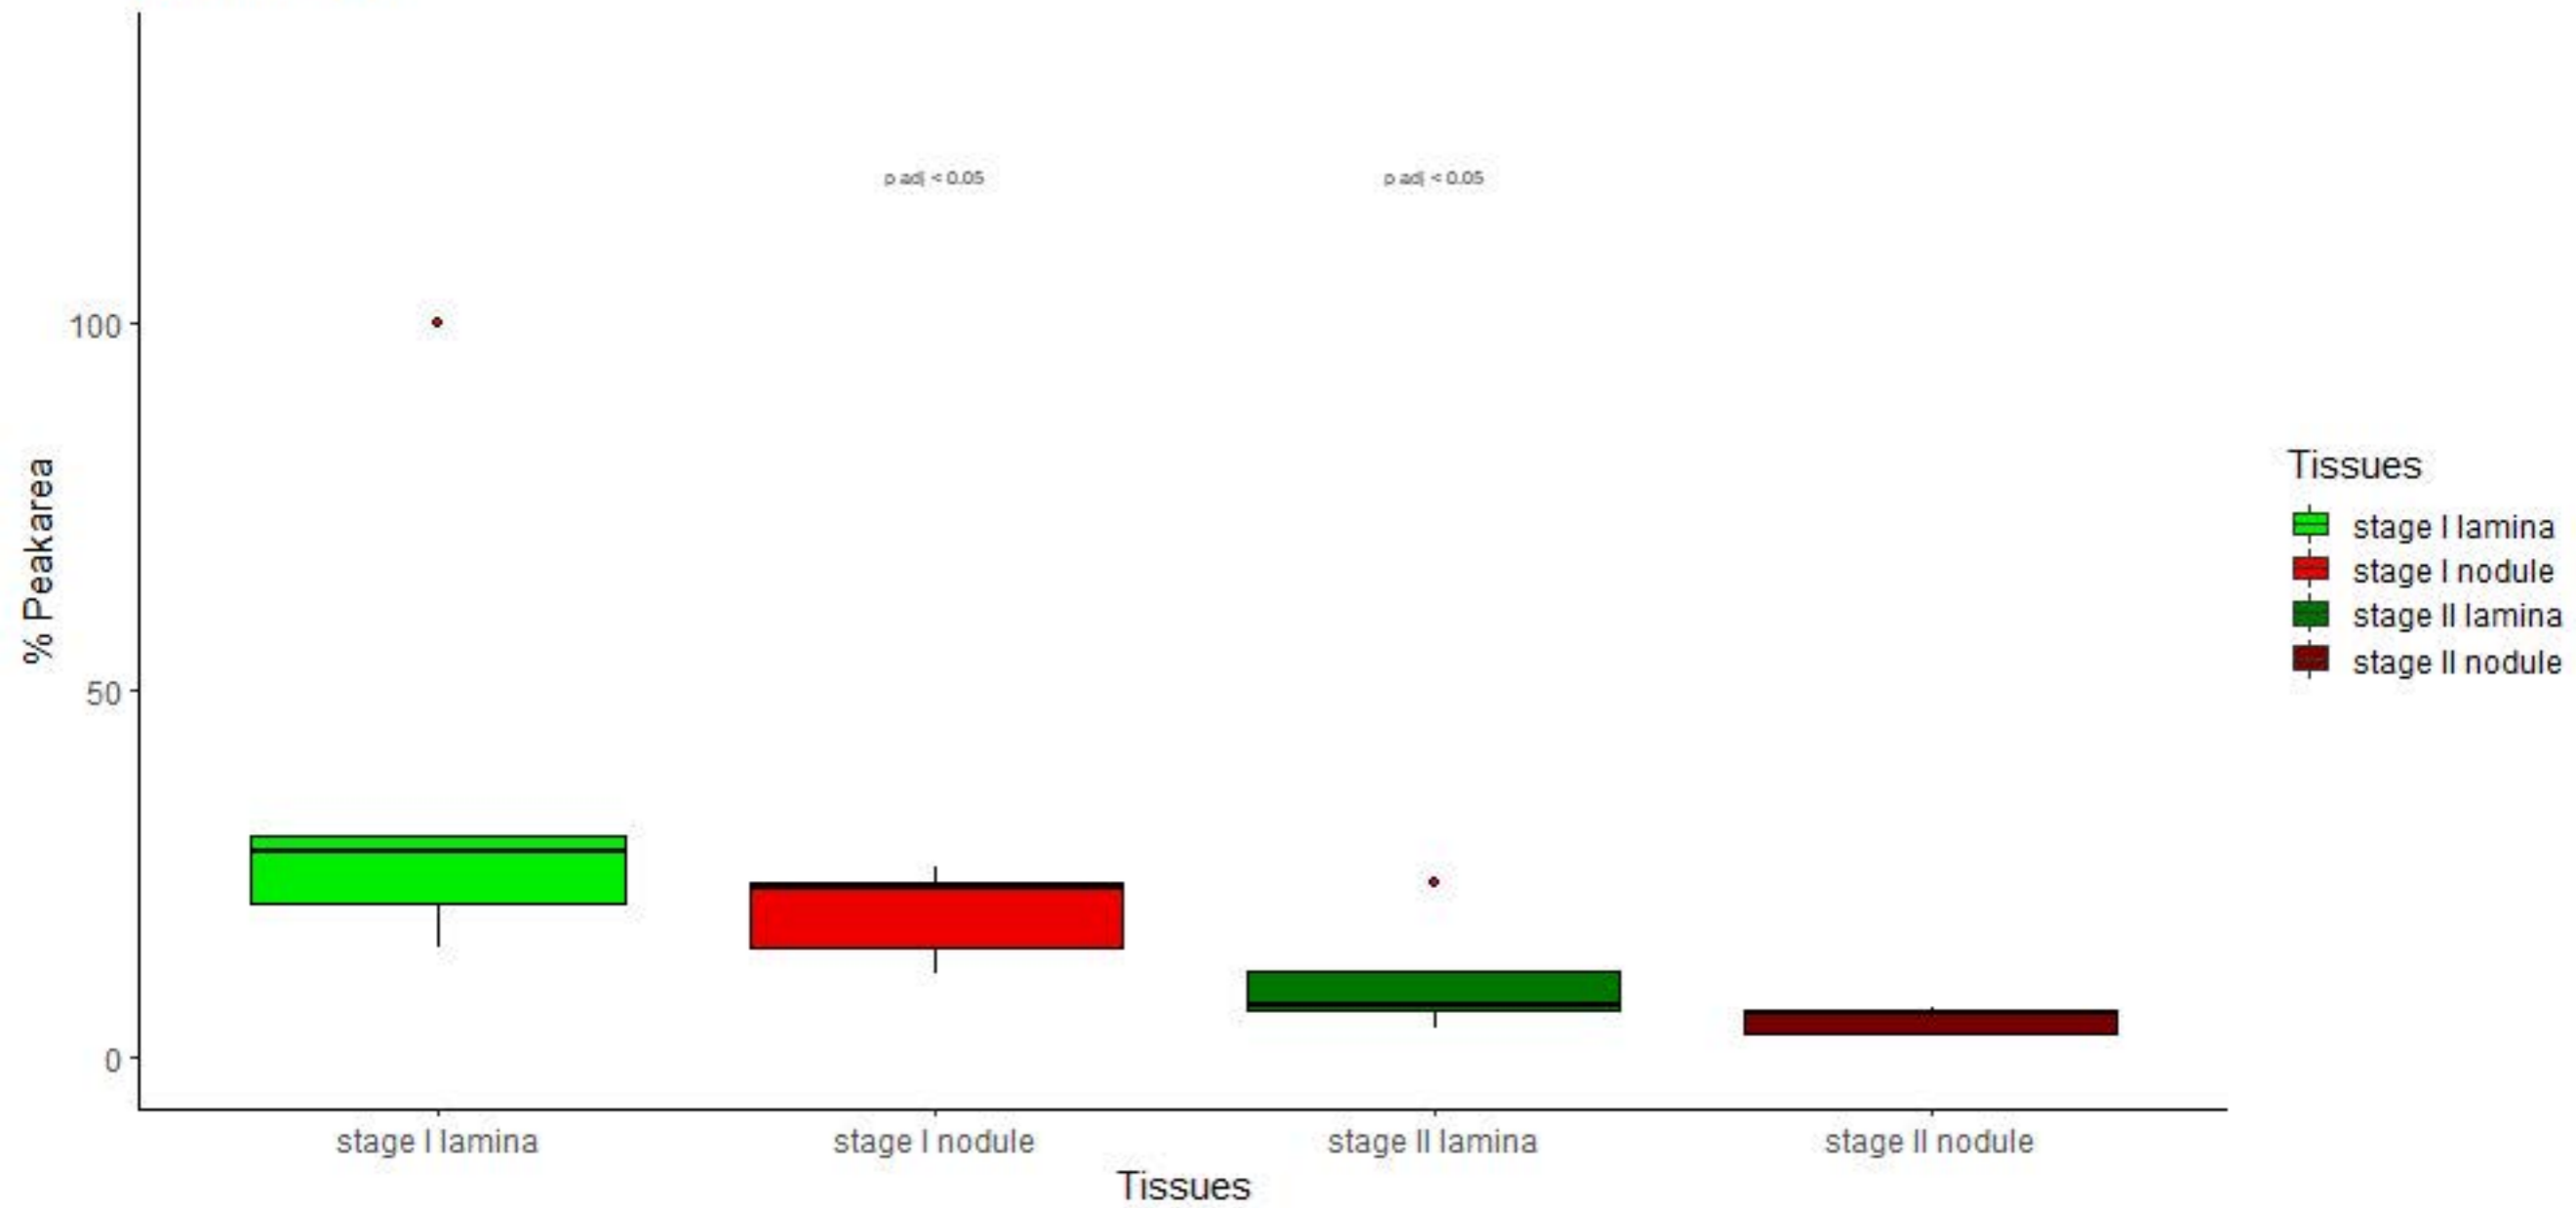

# Malic acid S50

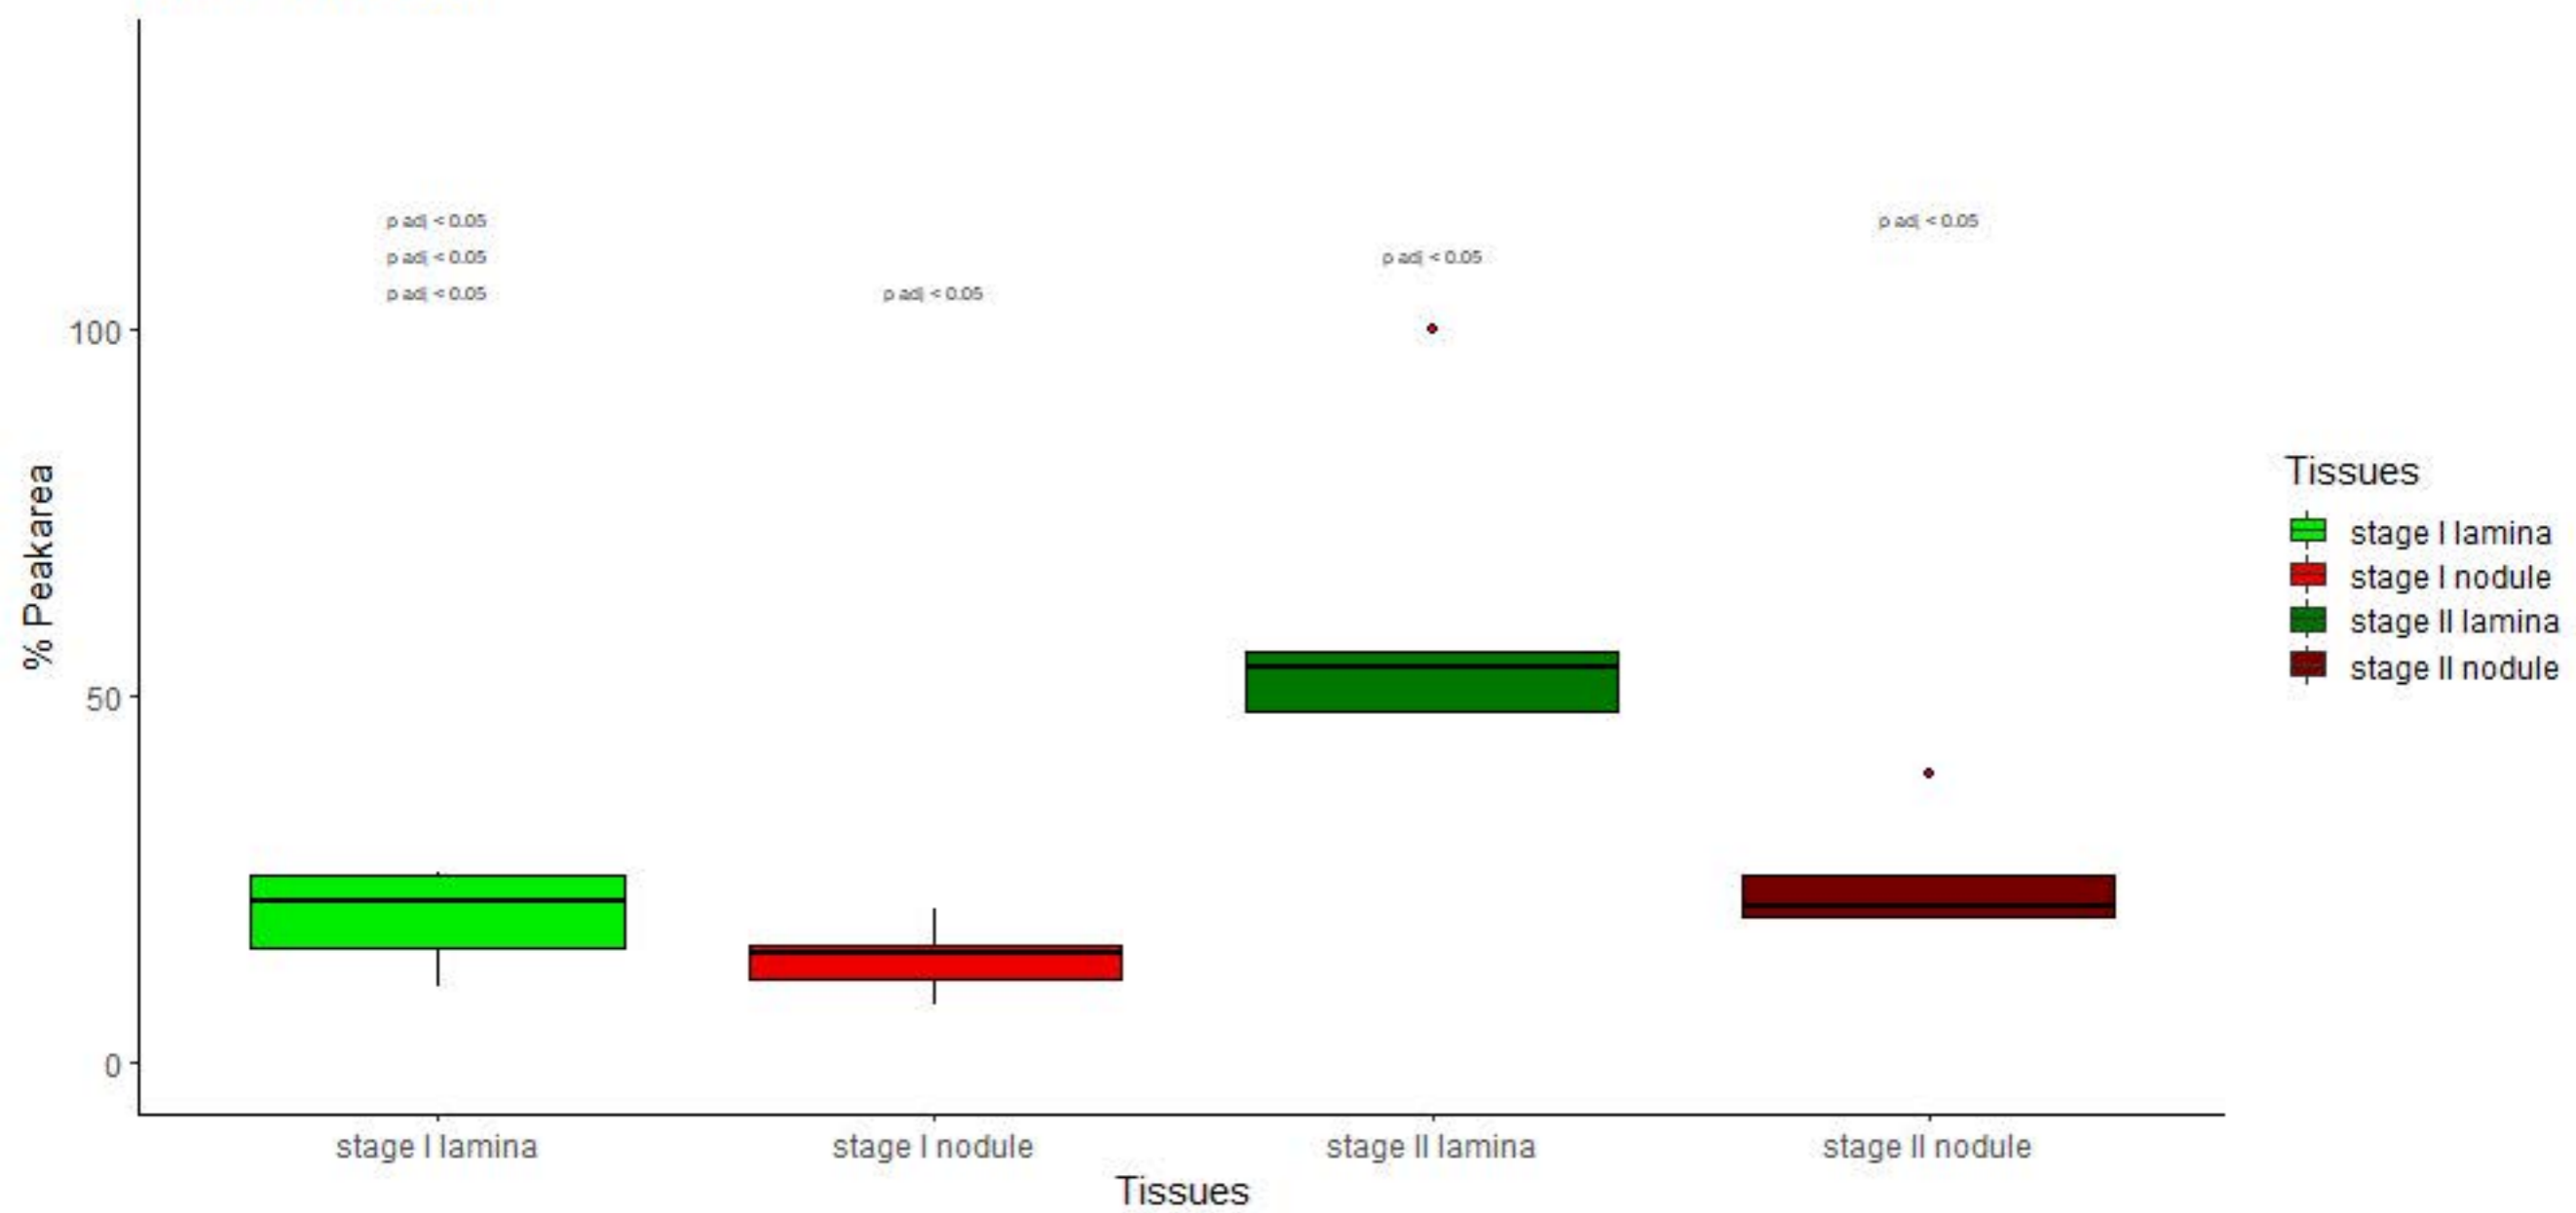

# Malic acid, 2-methyl-

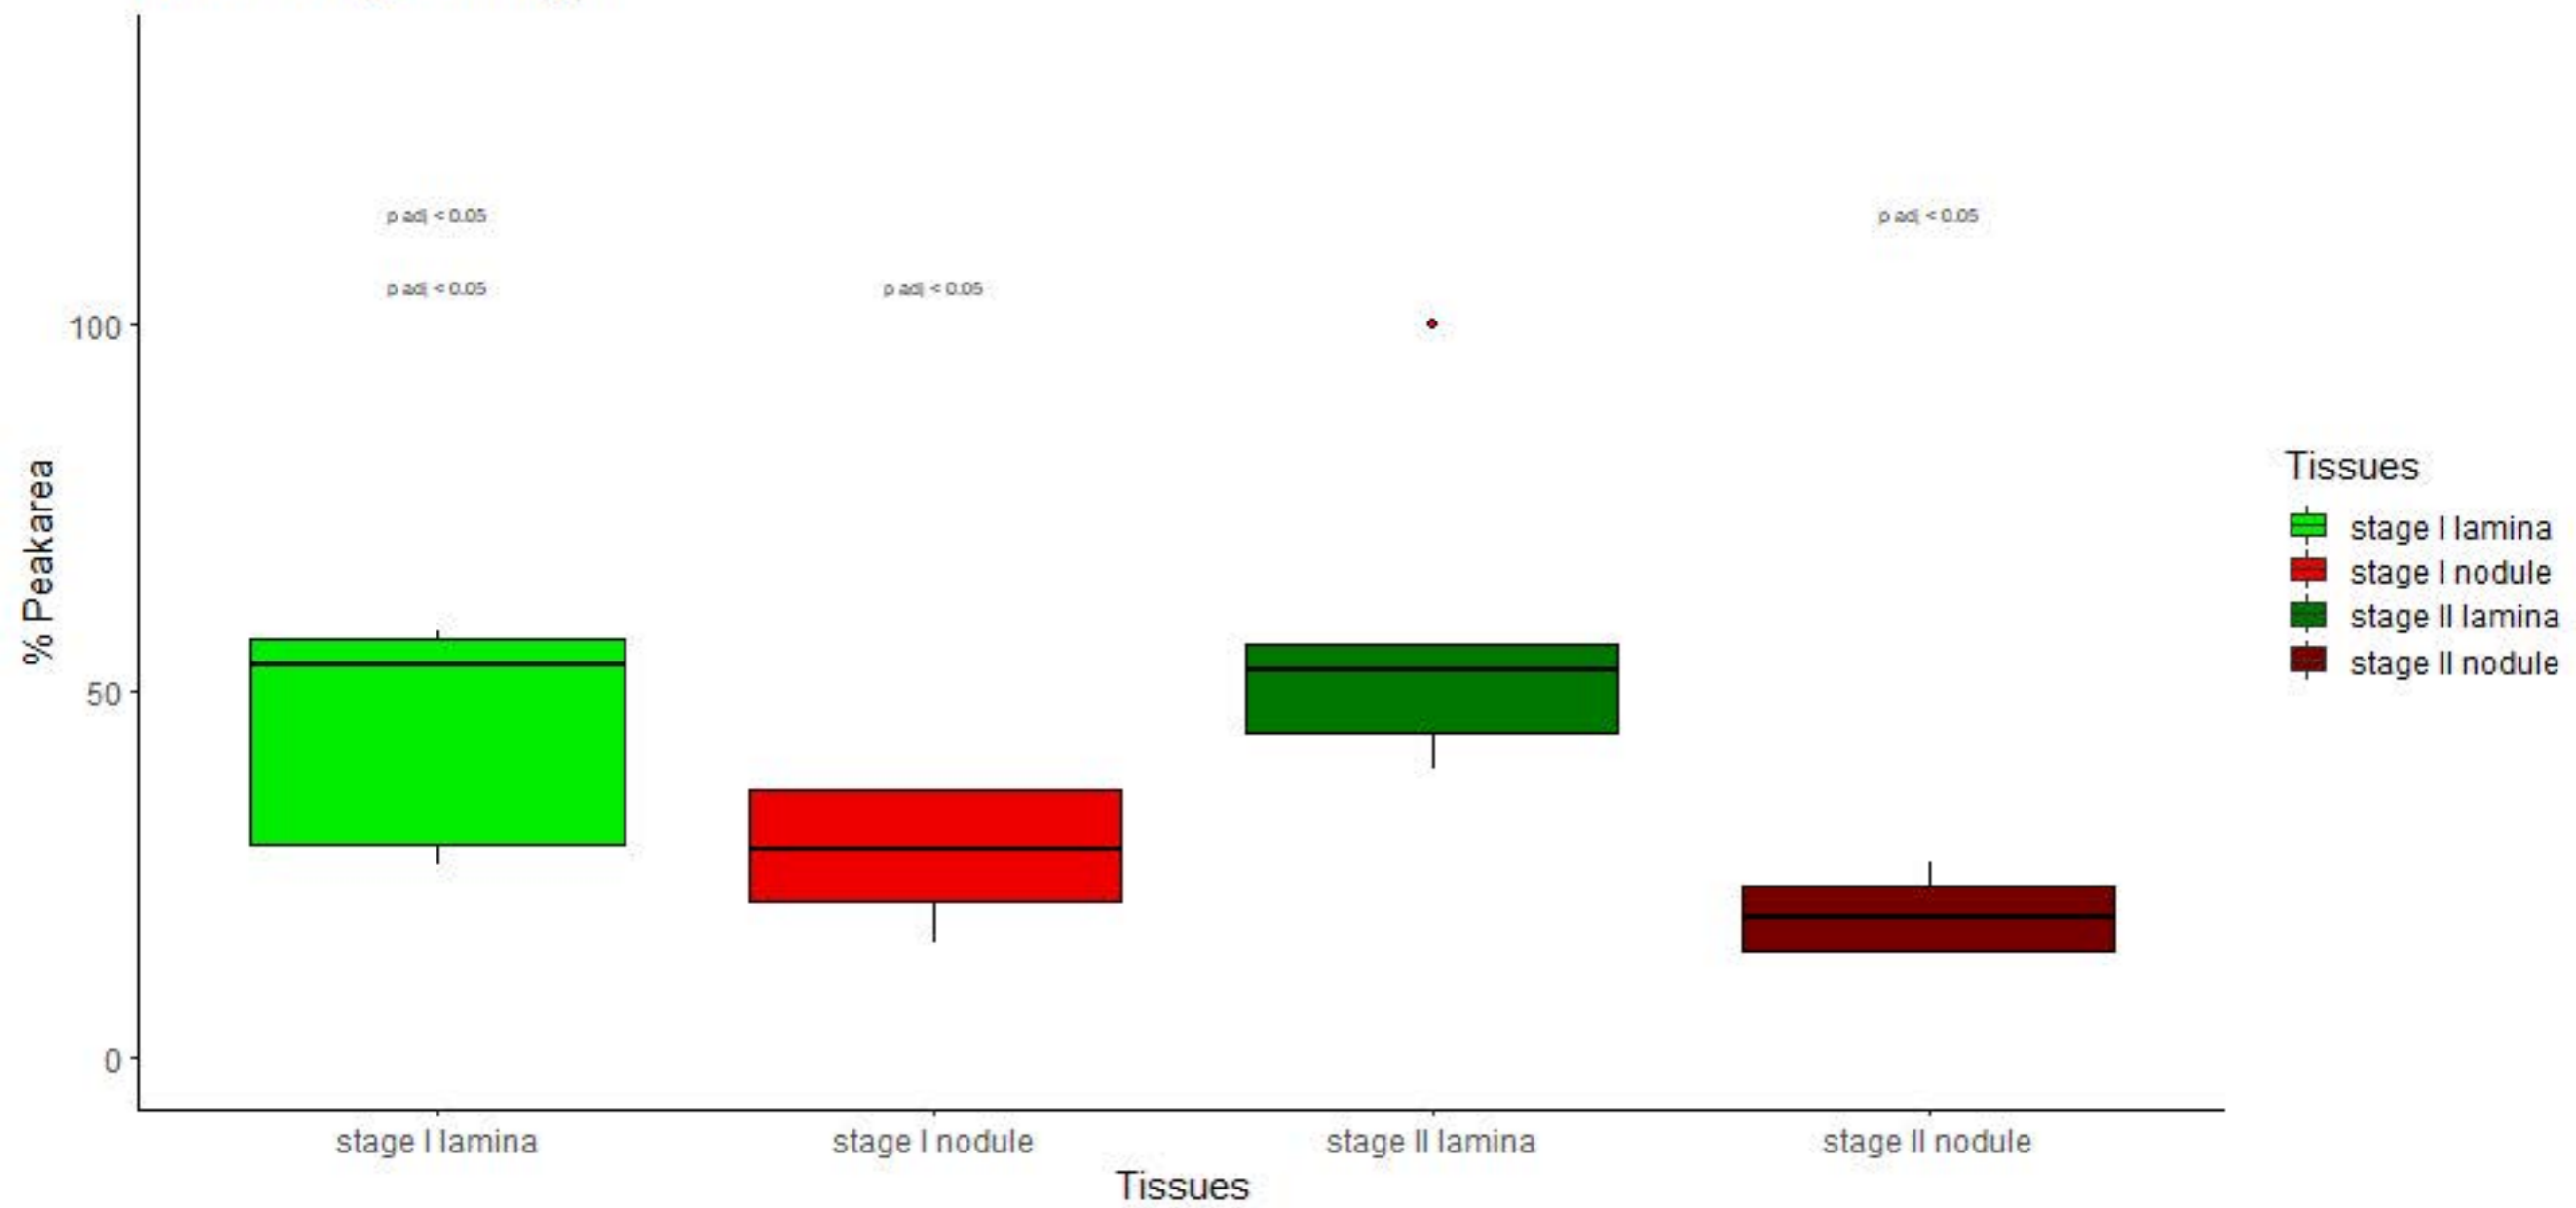

# Glutaric acid, 2-oxo- MP

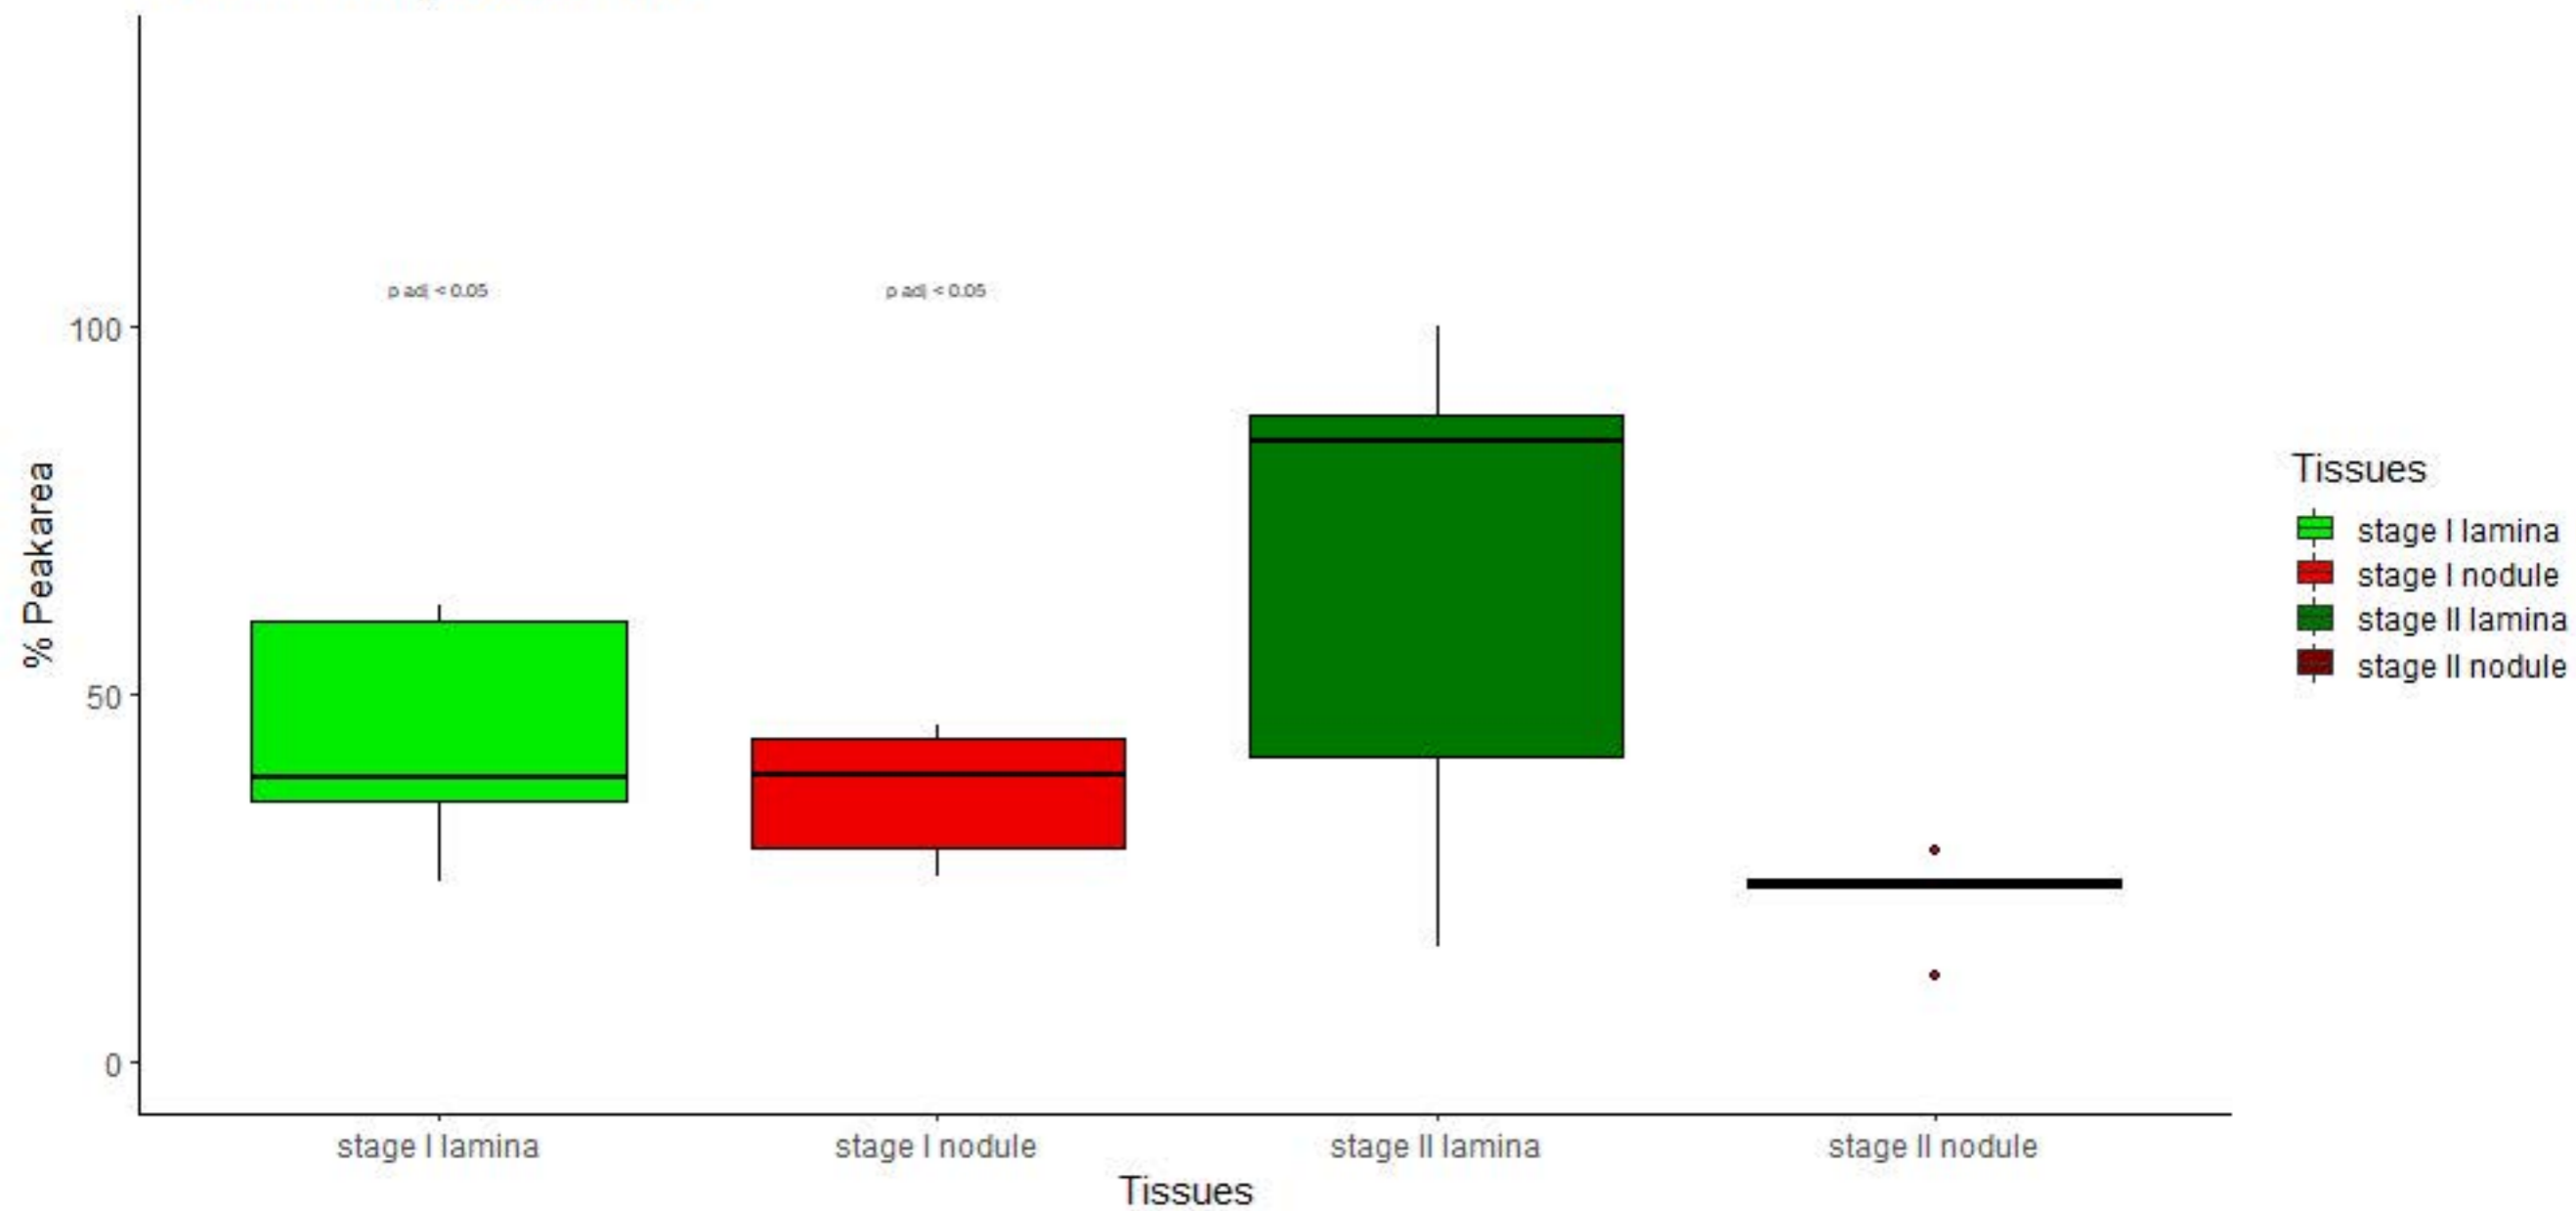

# Citric acid

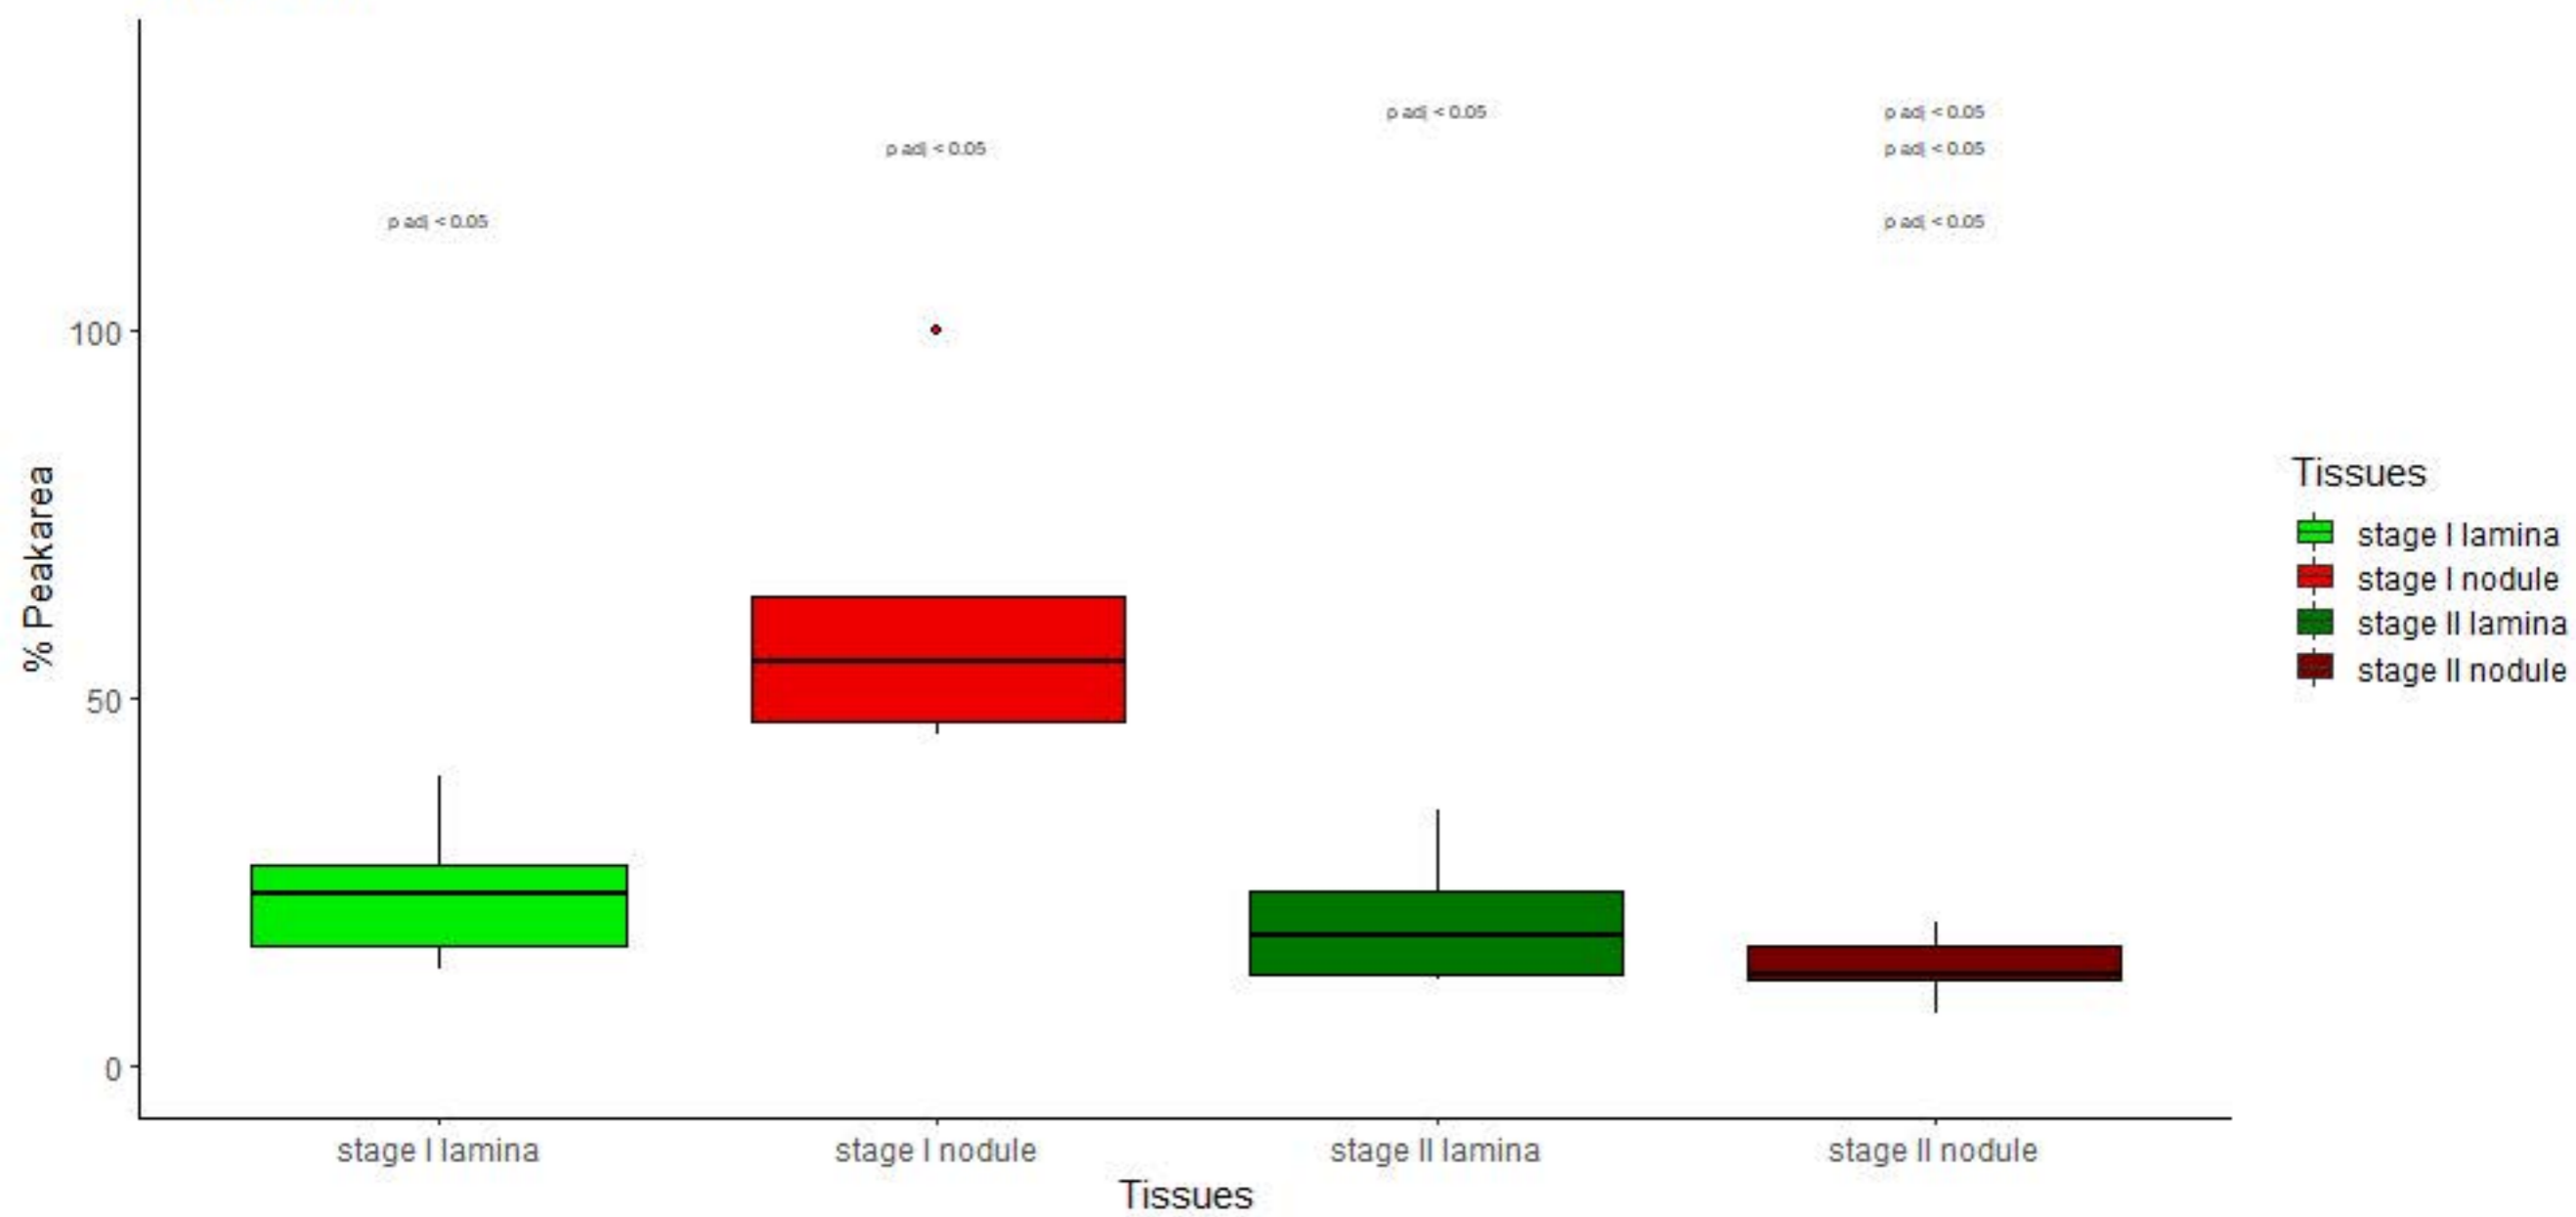

# Ascorbic acid

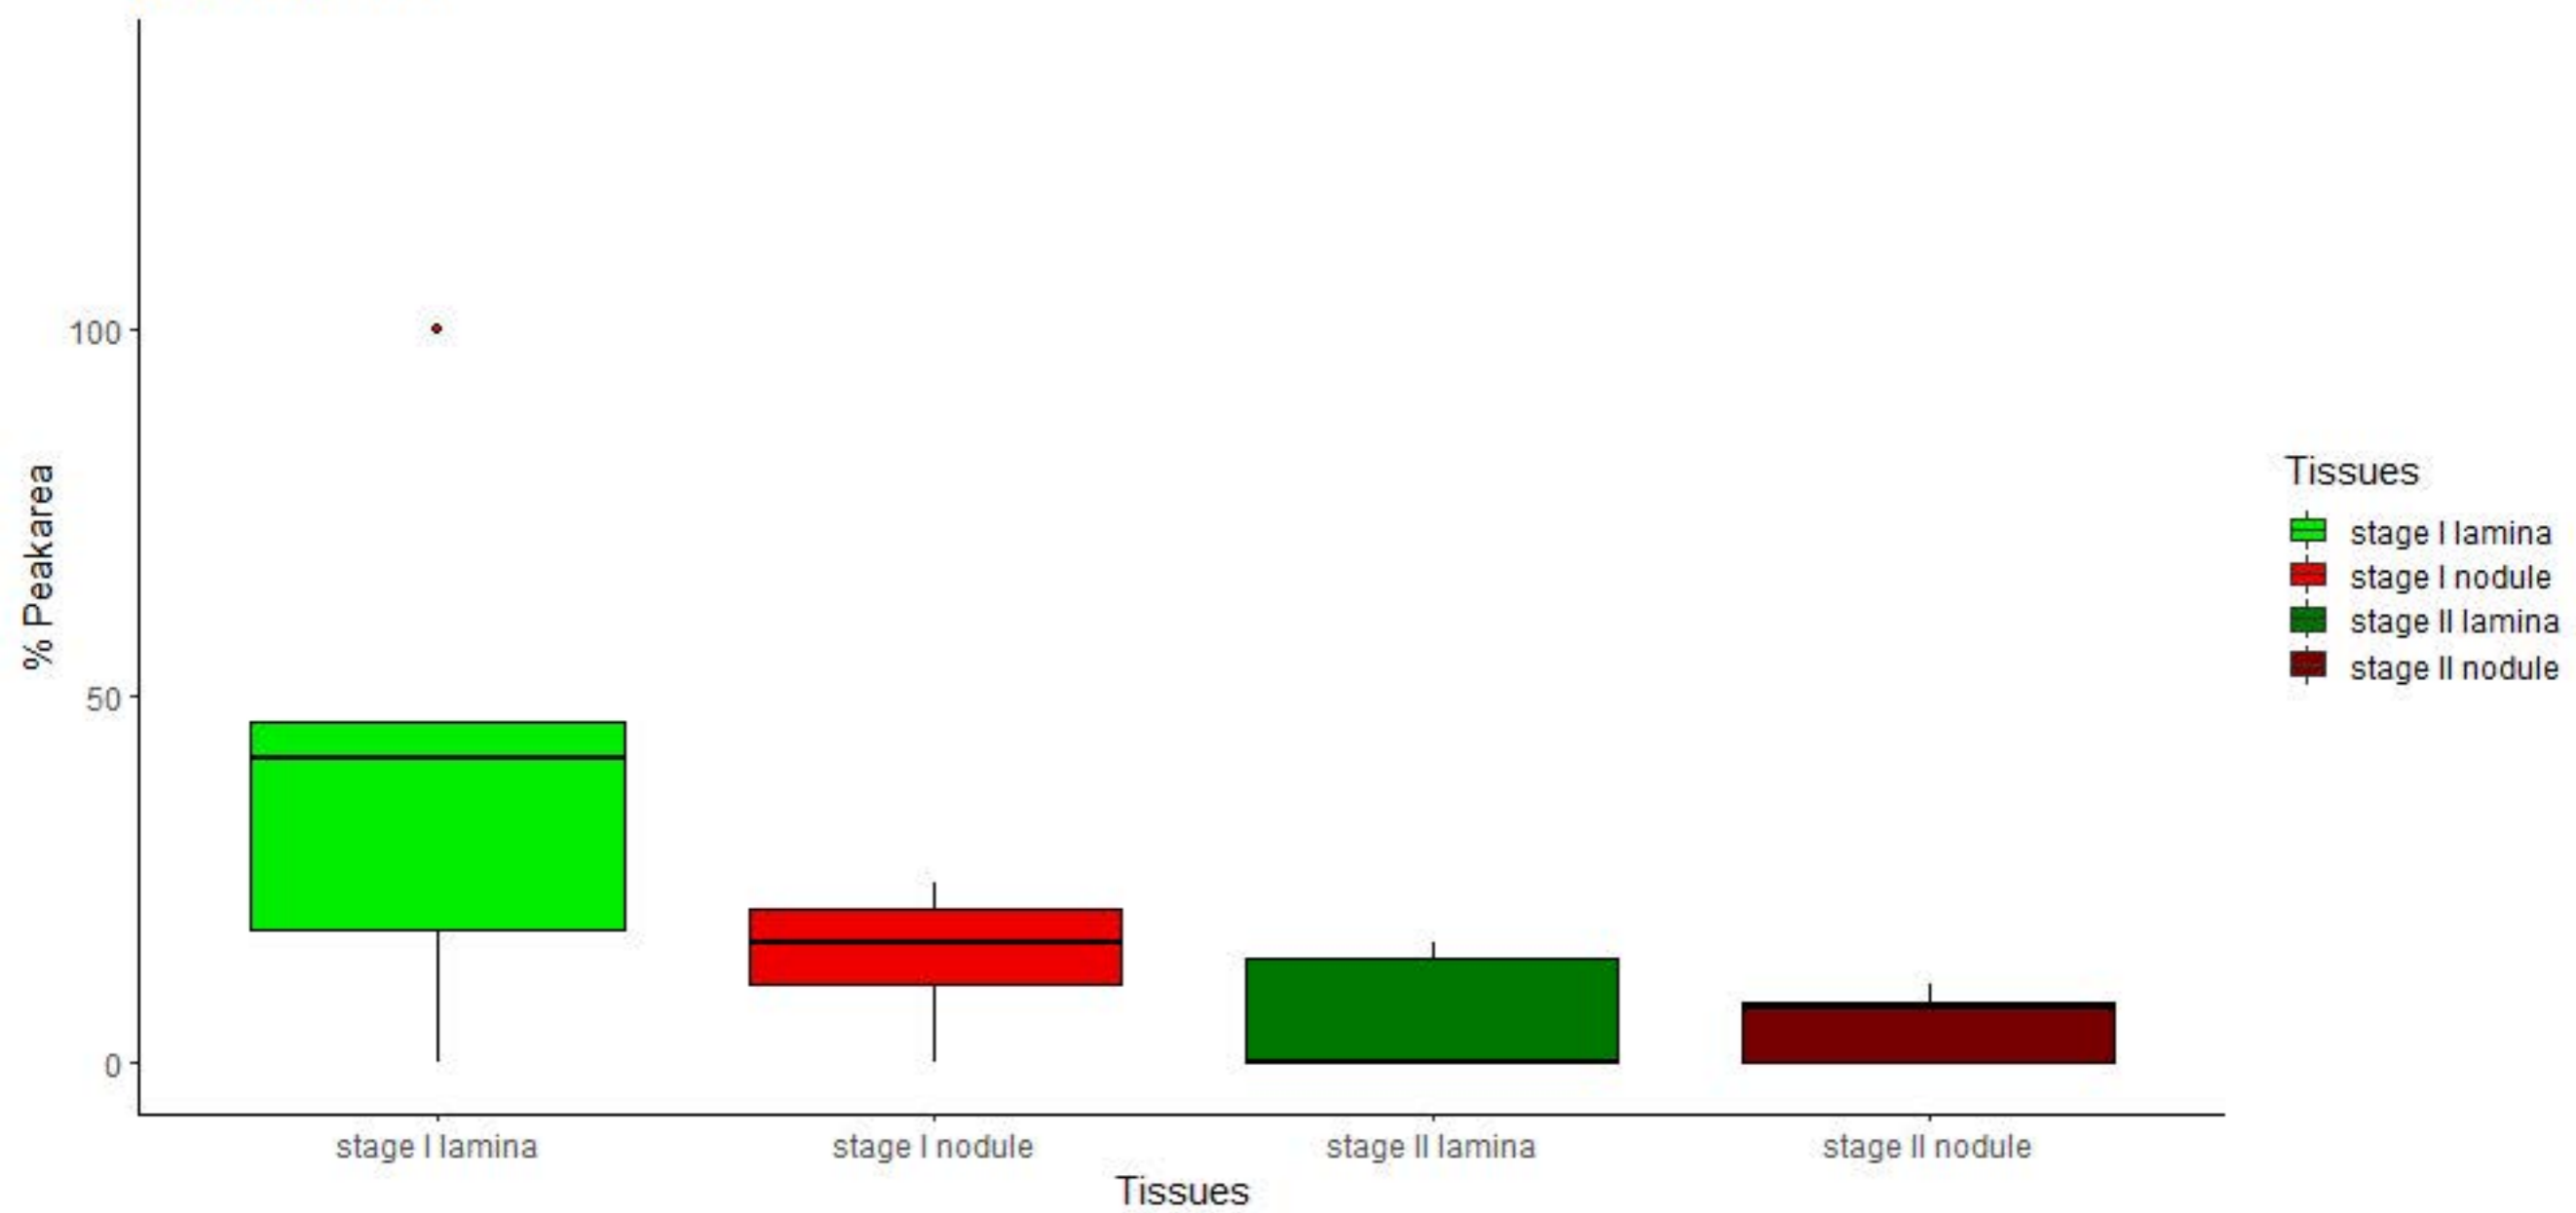



# Dehydroascorbic acid dimer

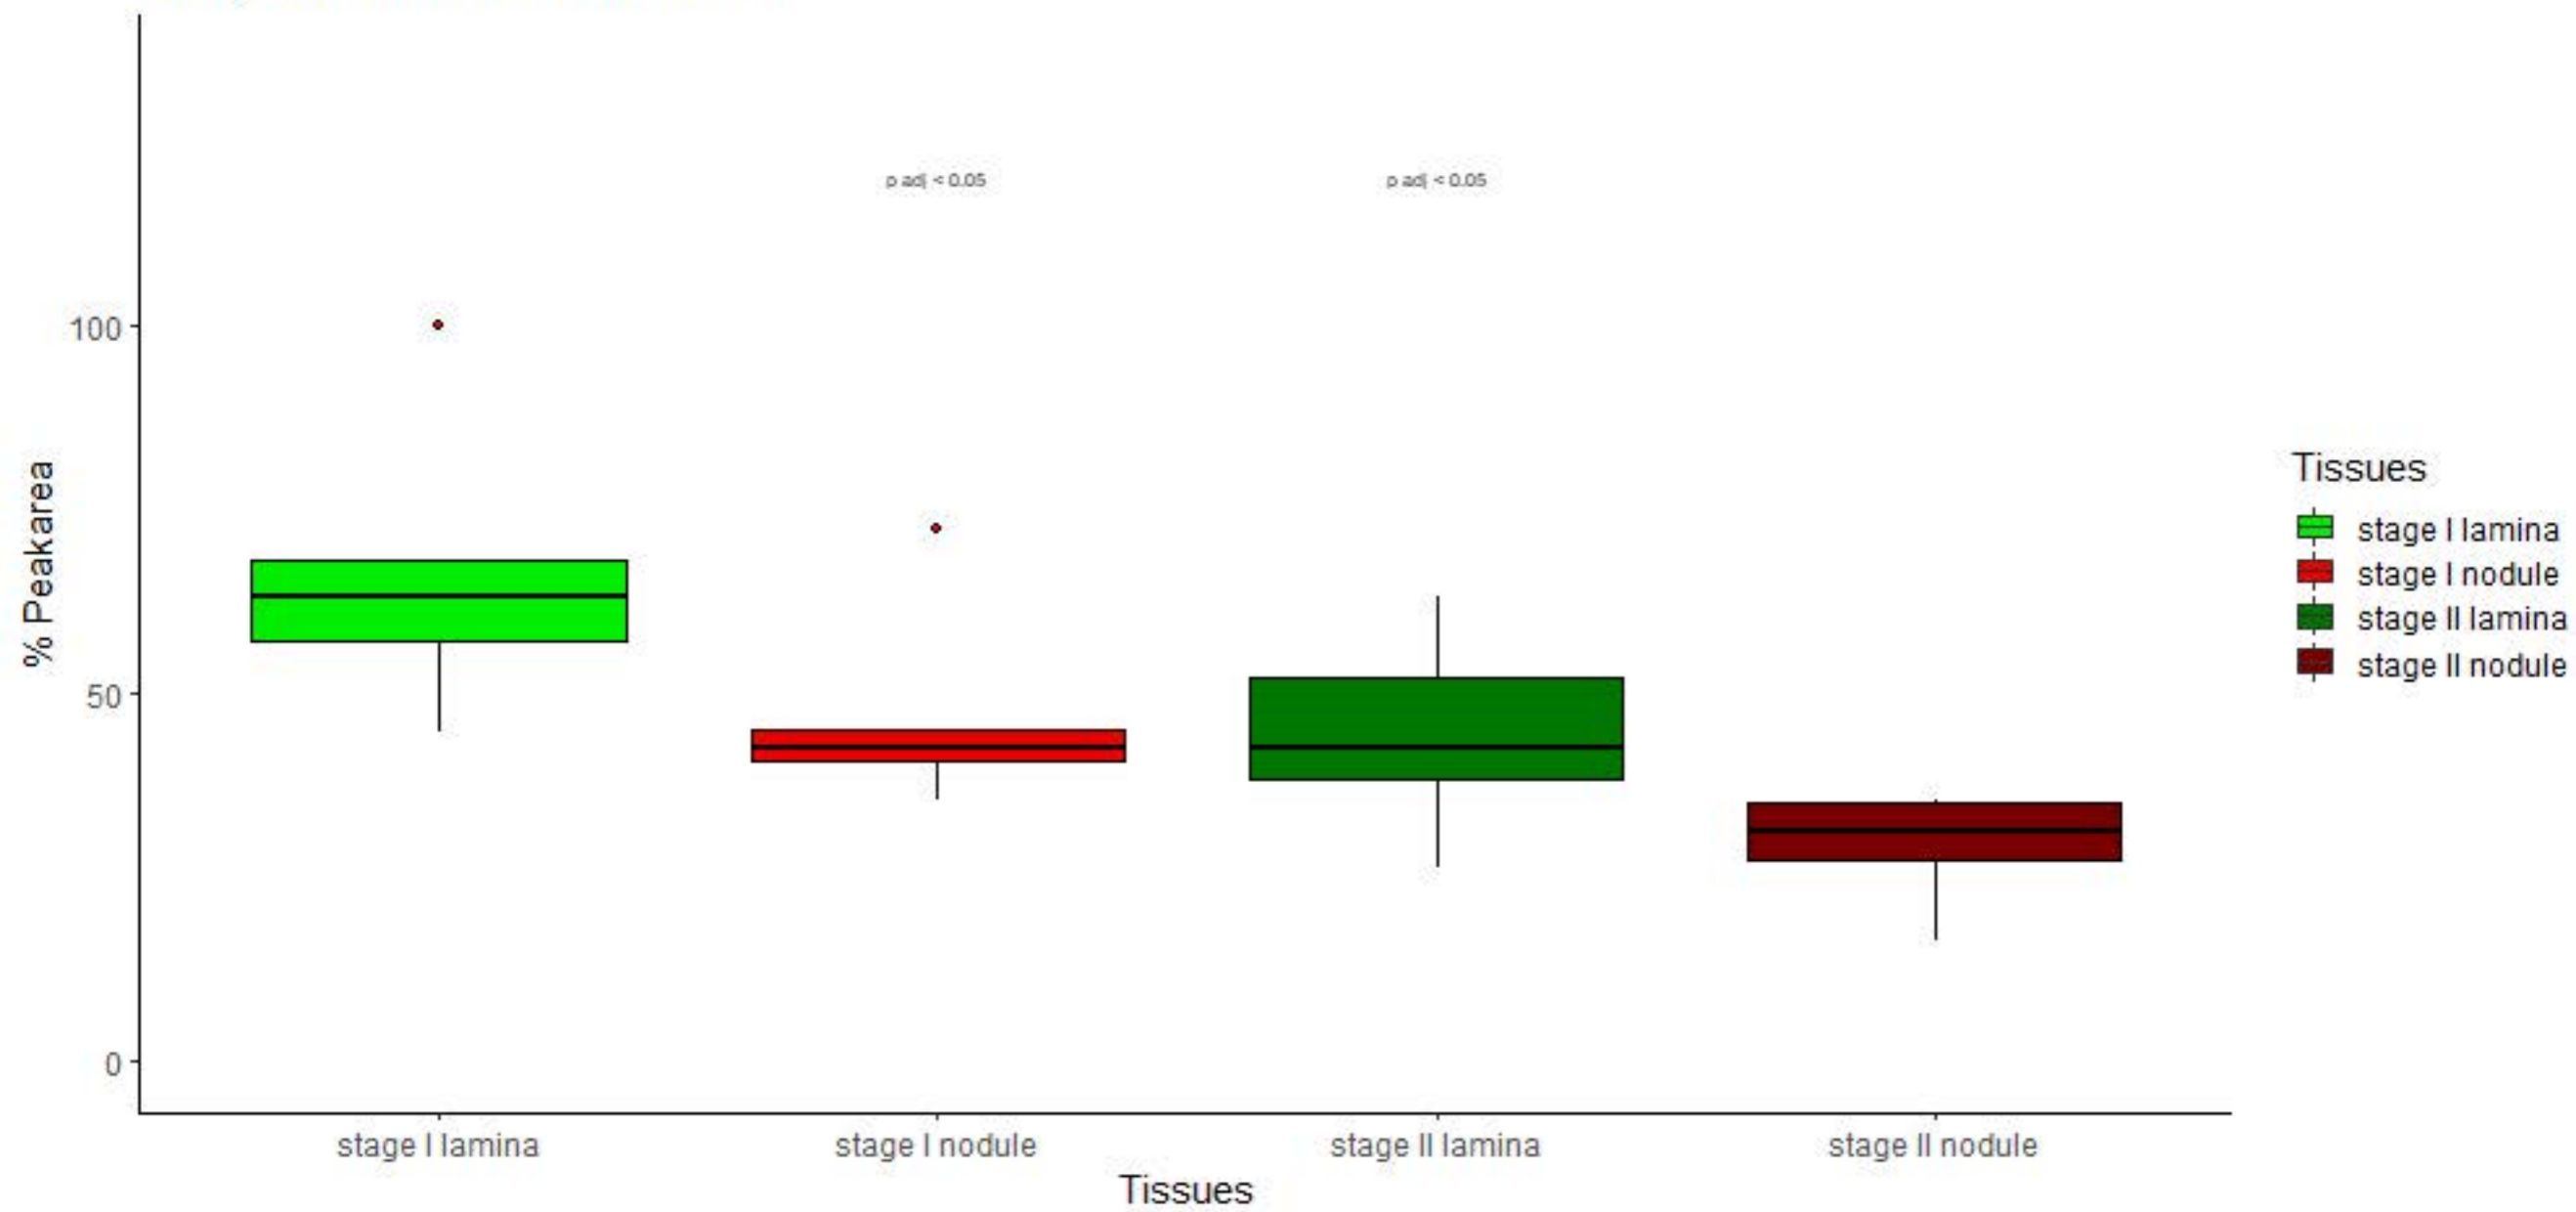

# Glyceric acid

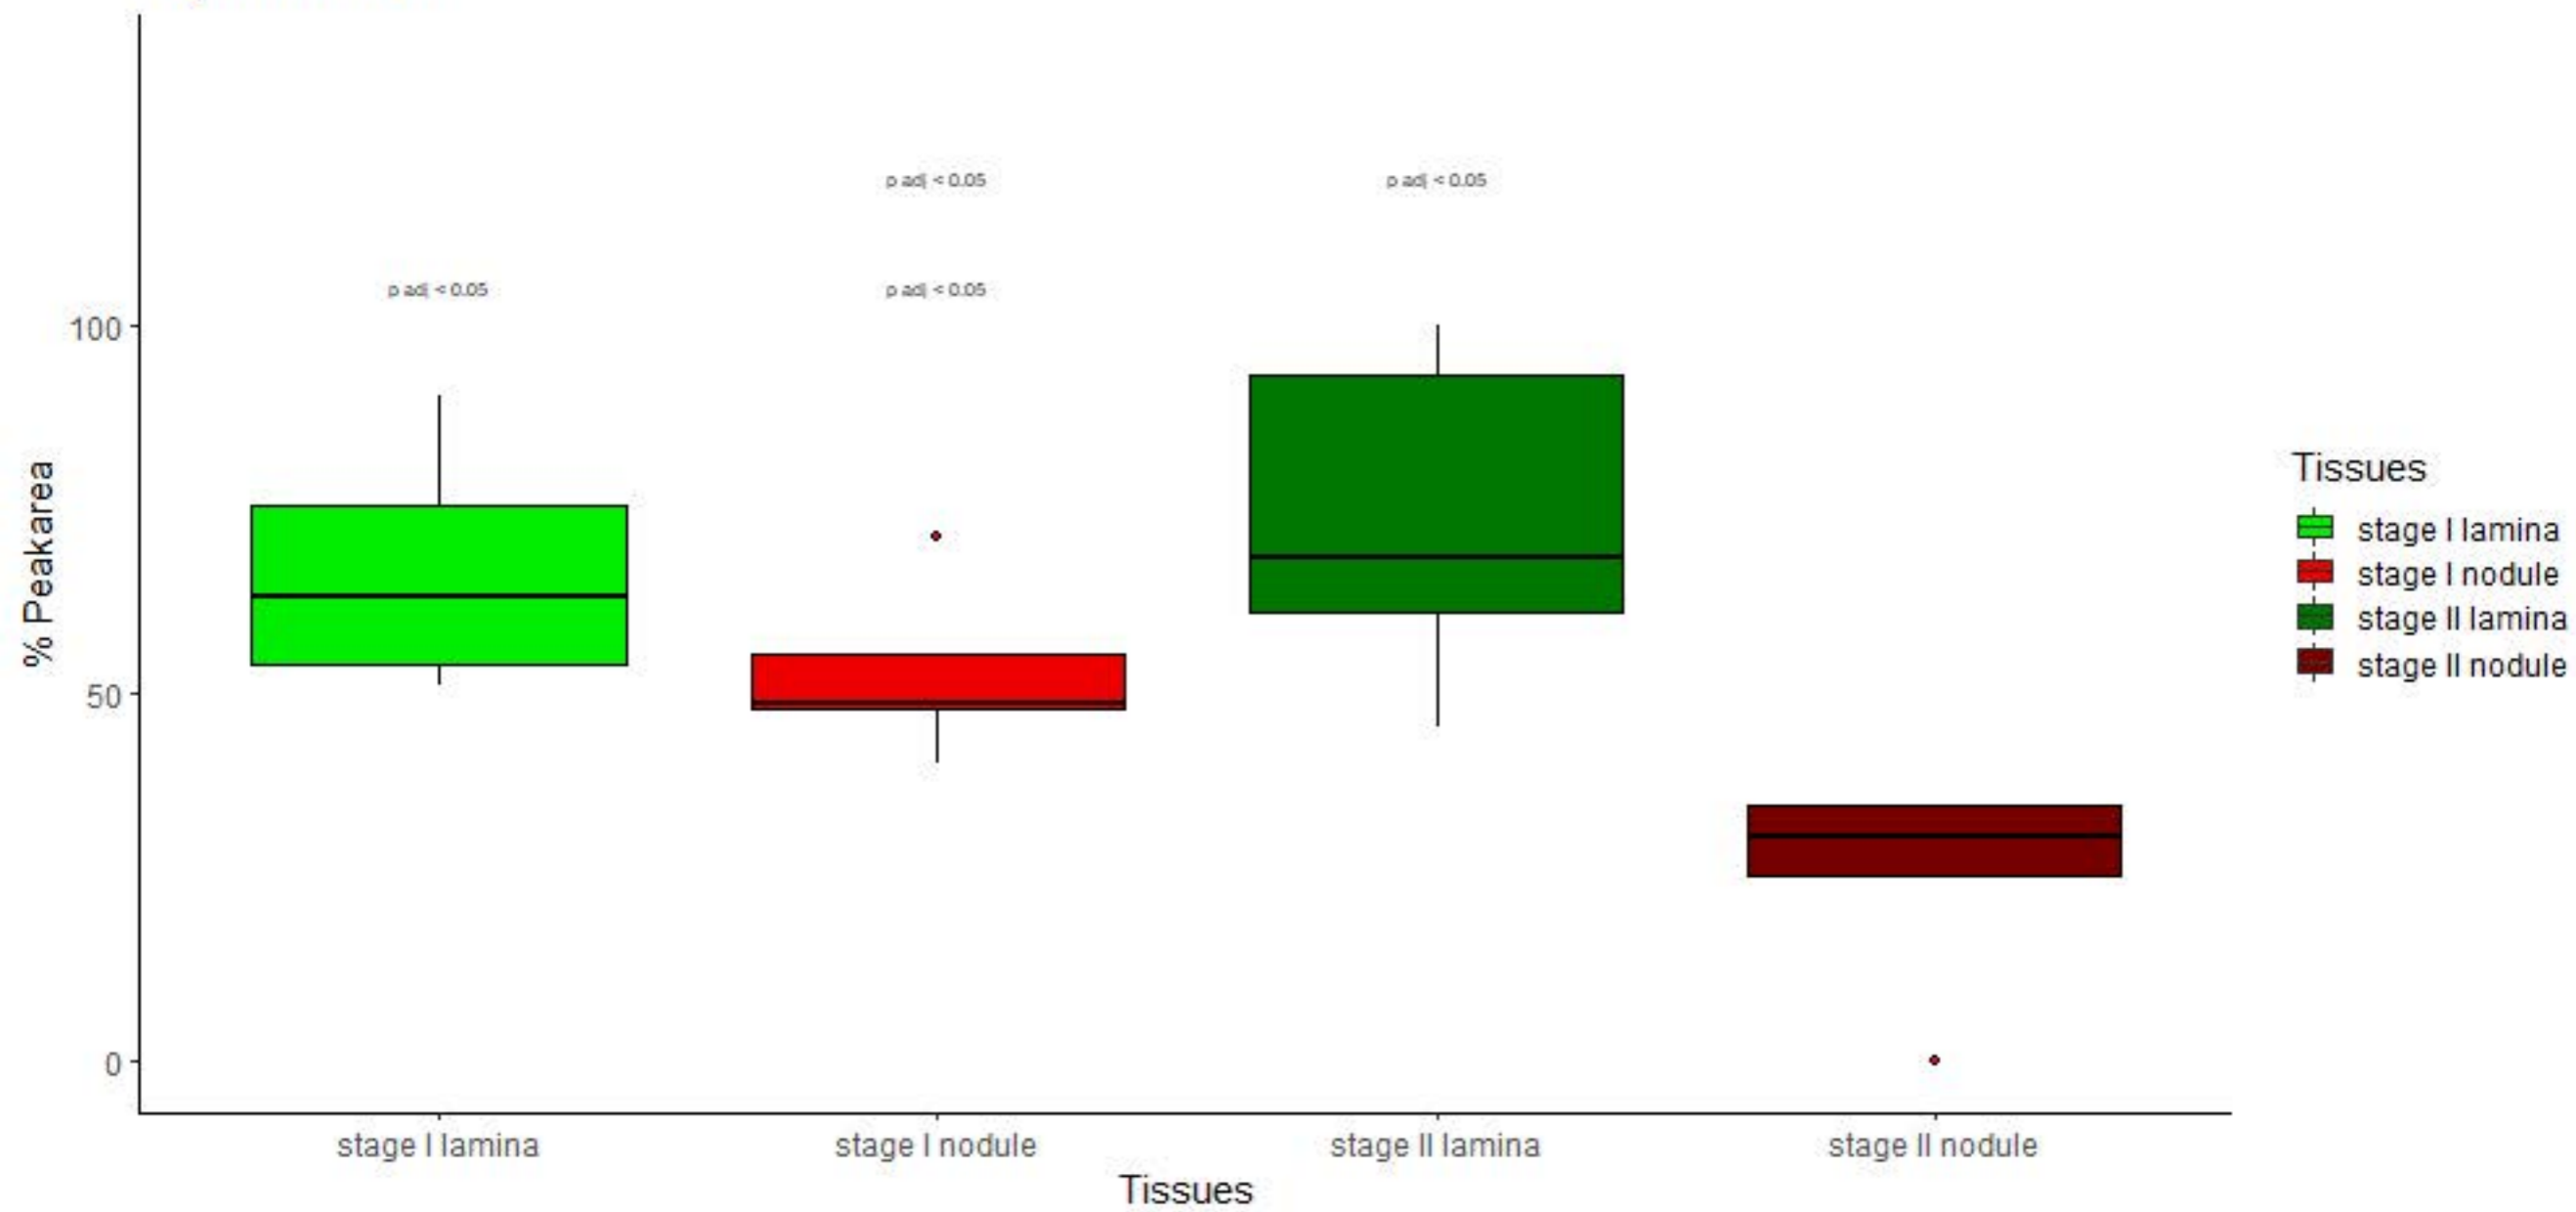

# Erythronic acid

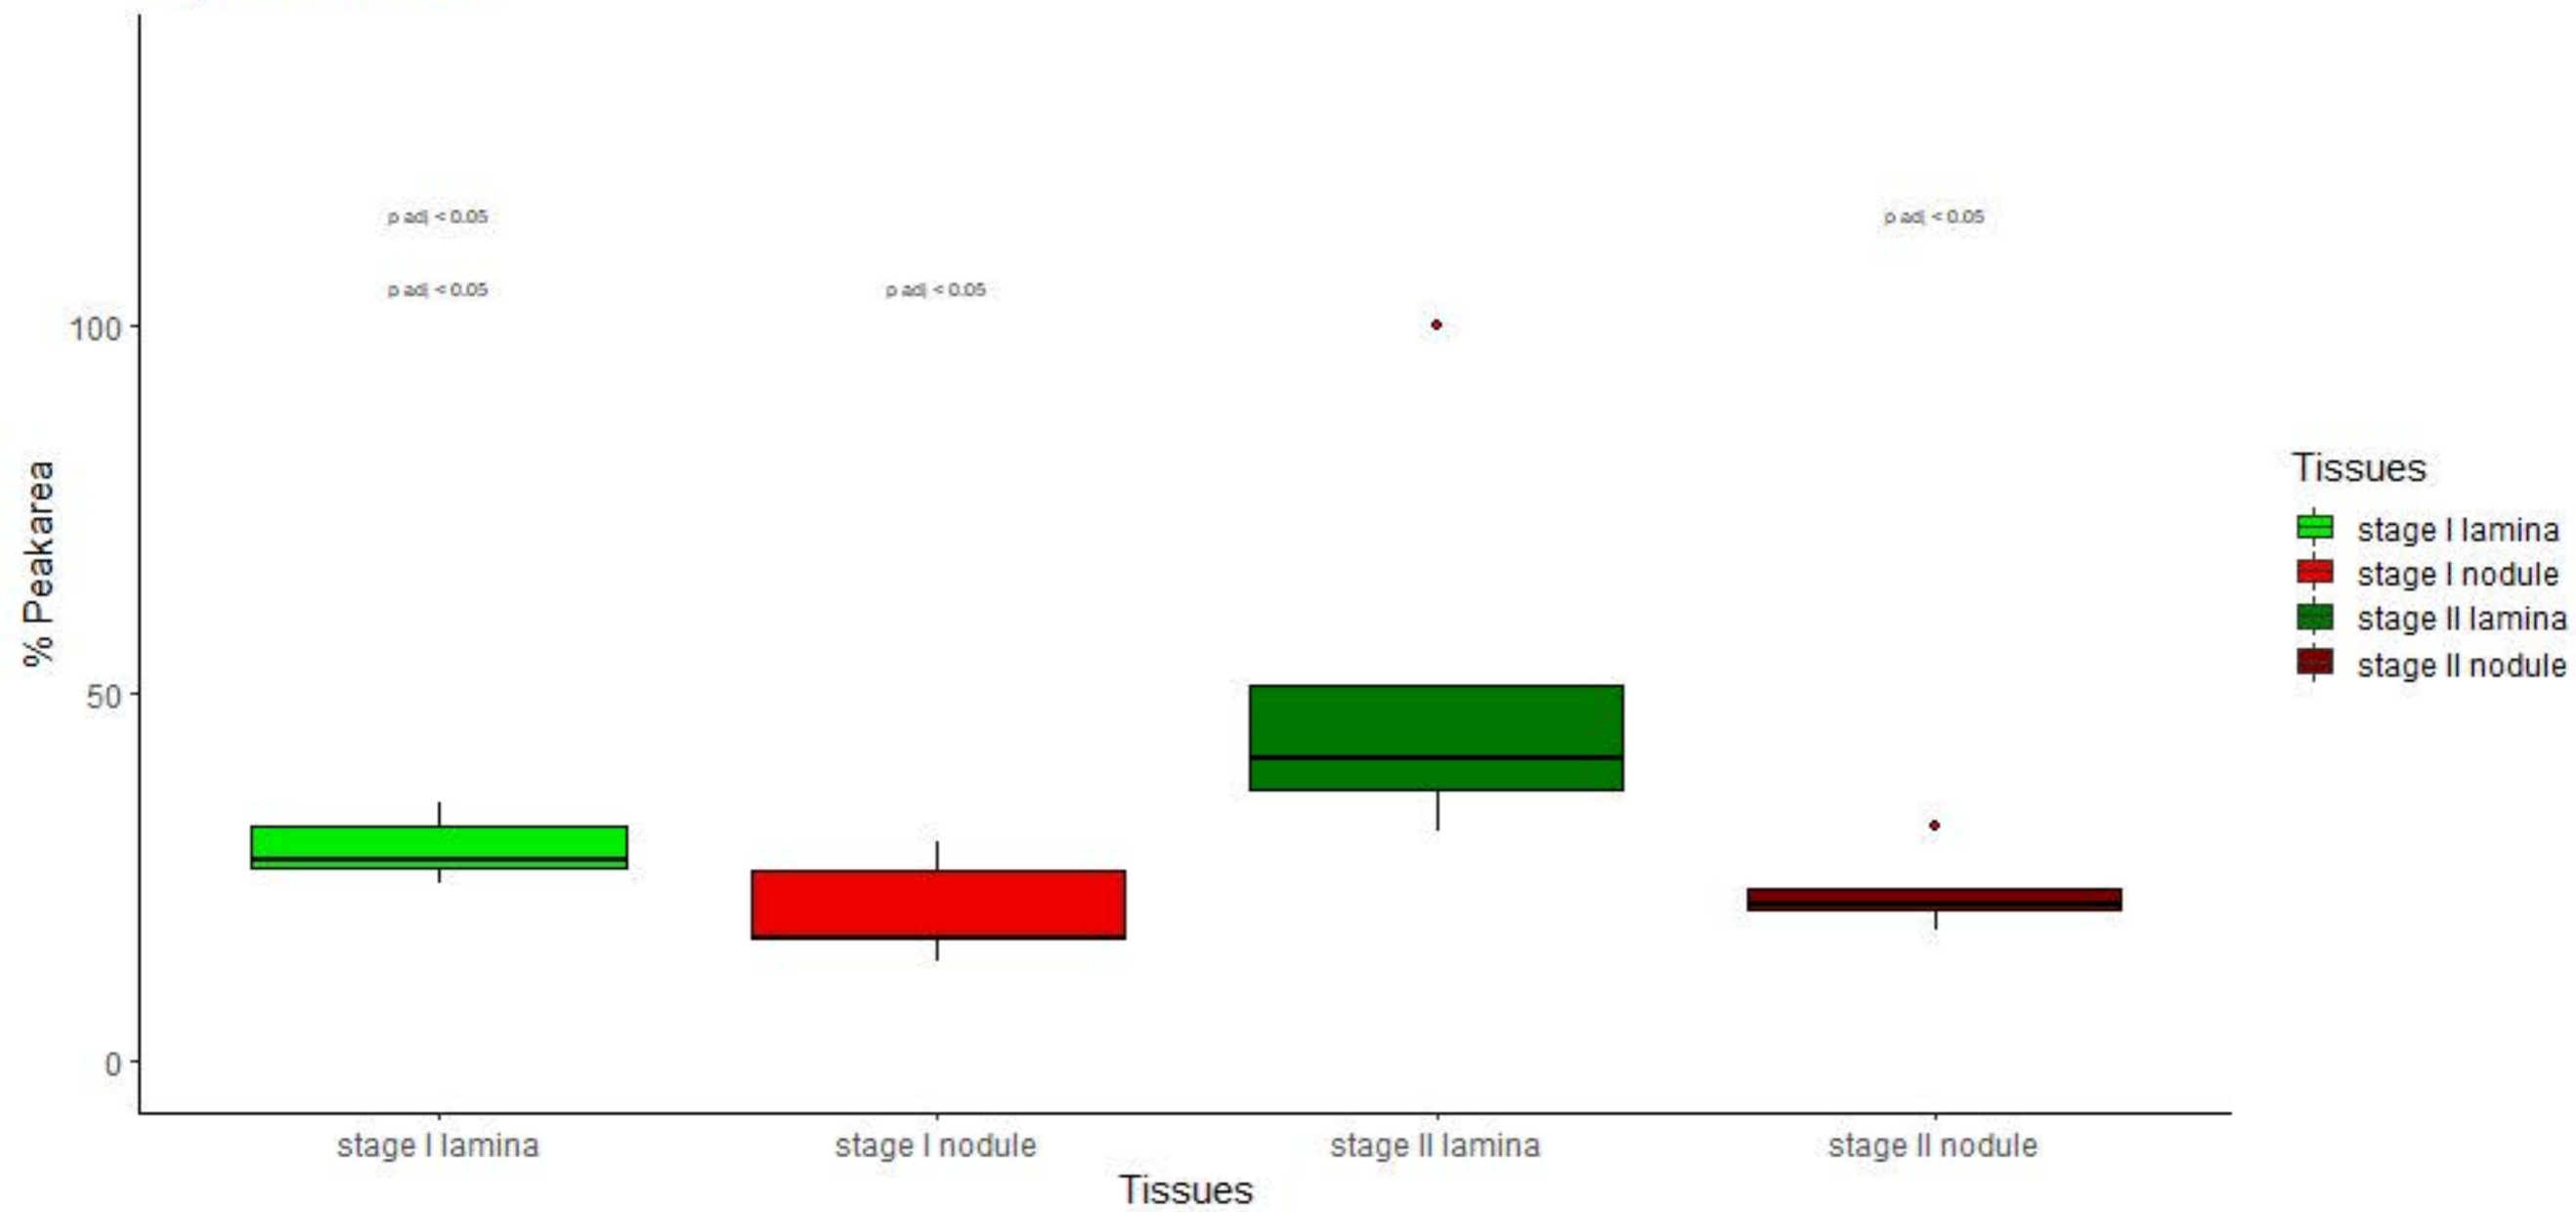

# Threonic acid

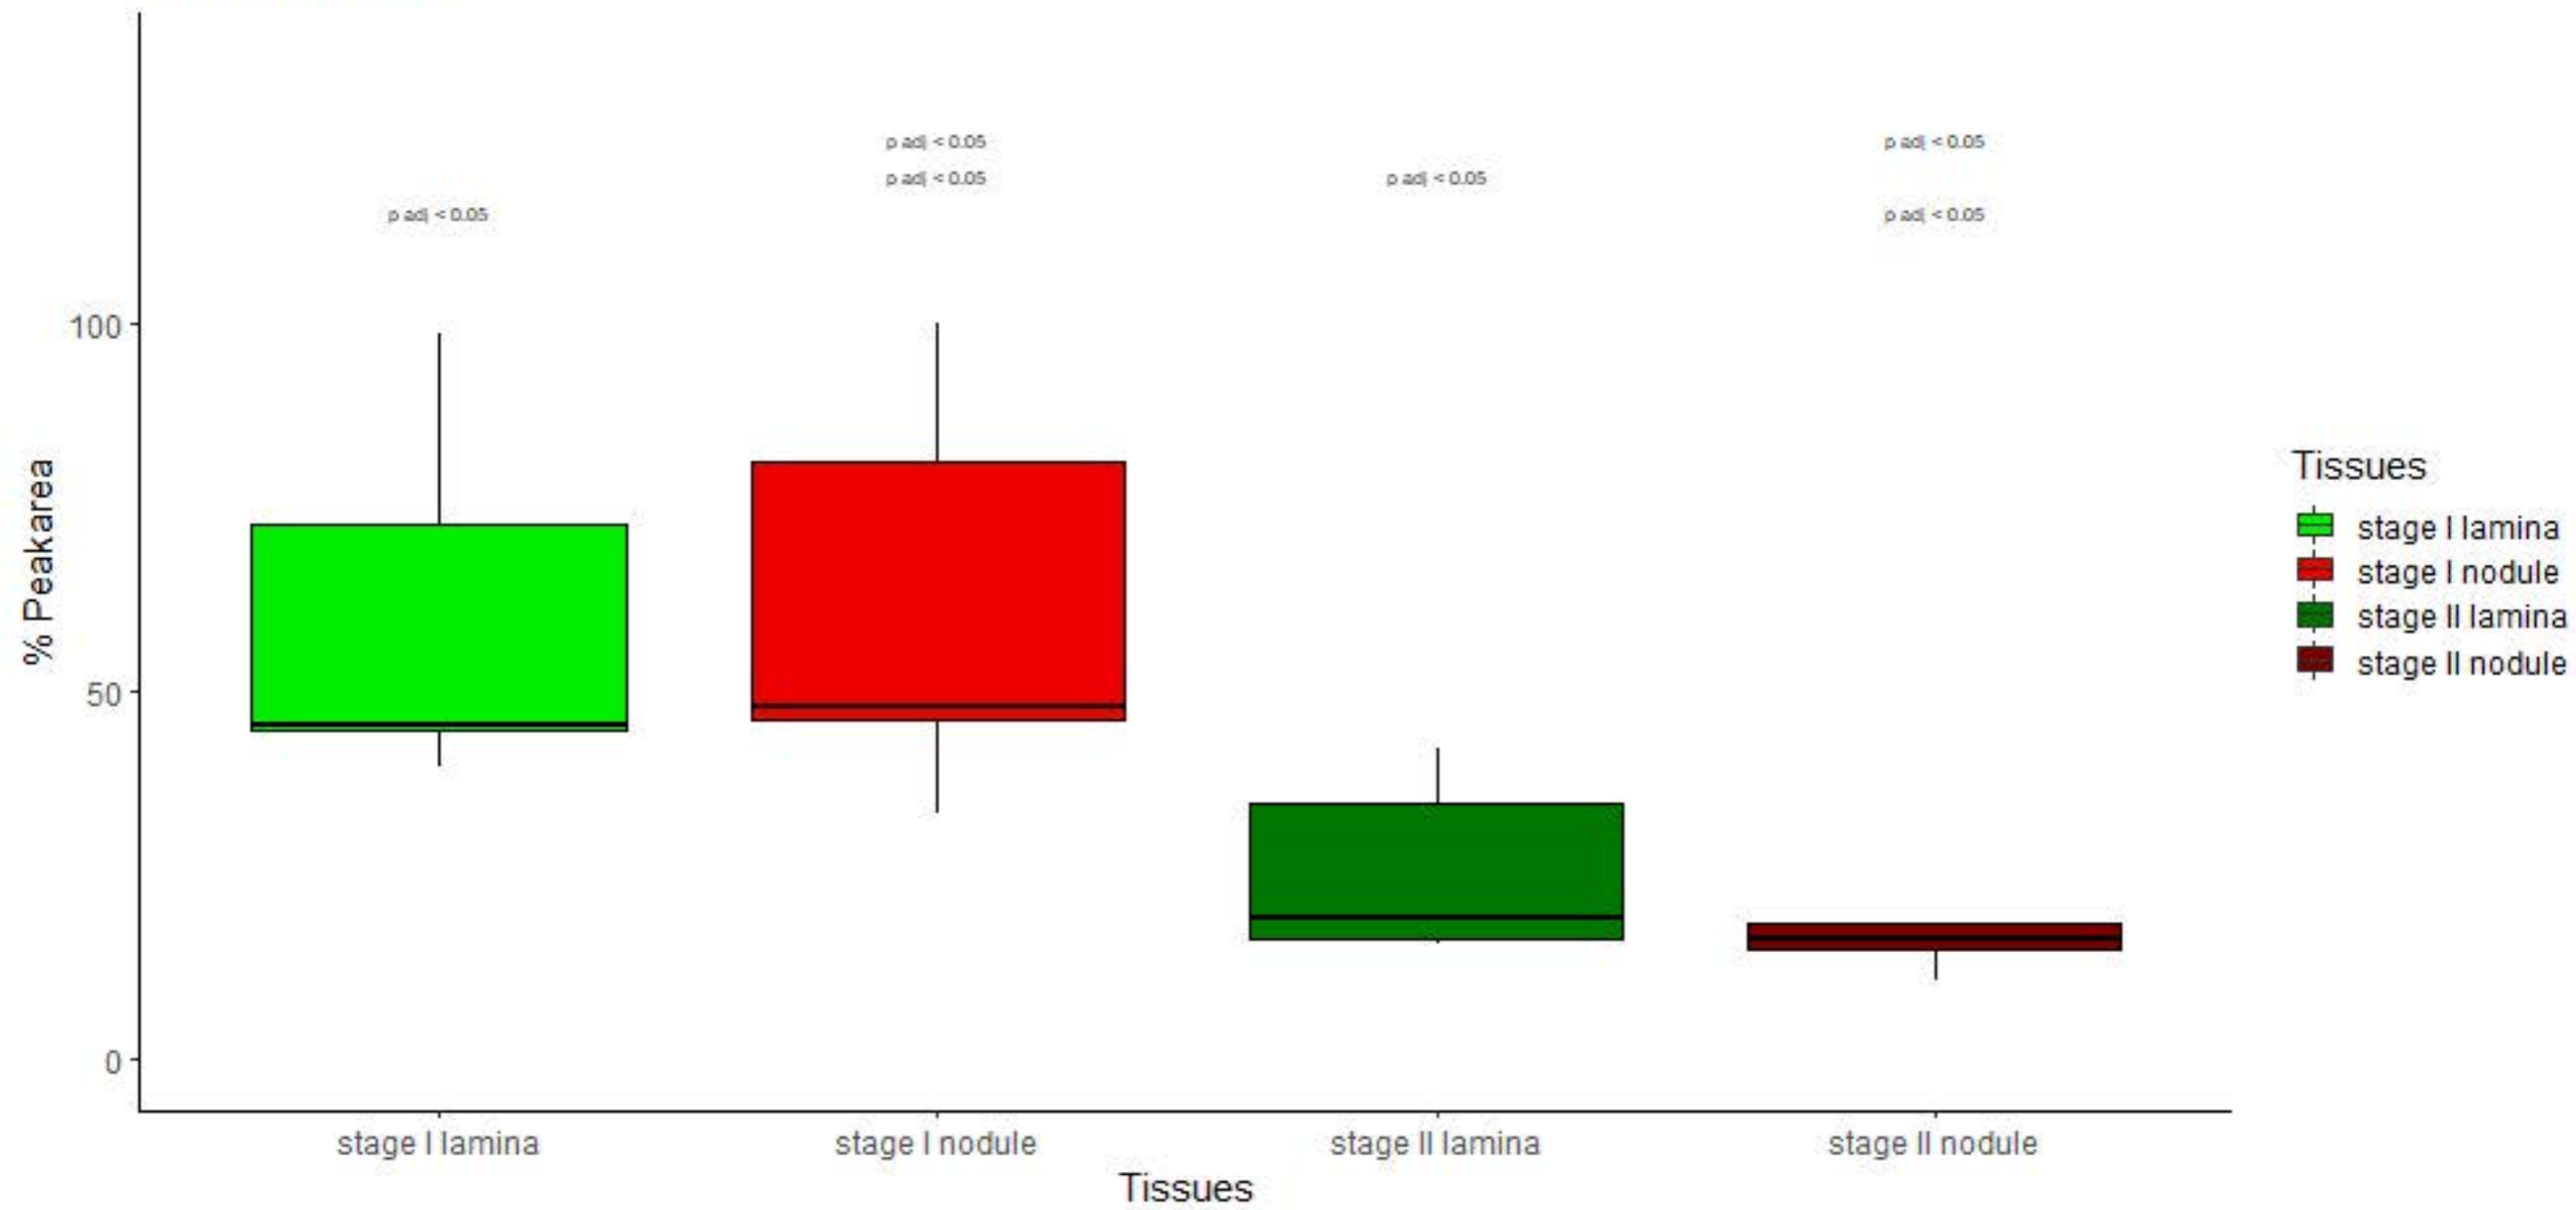

# ART Threonic acid-1,4-lactone

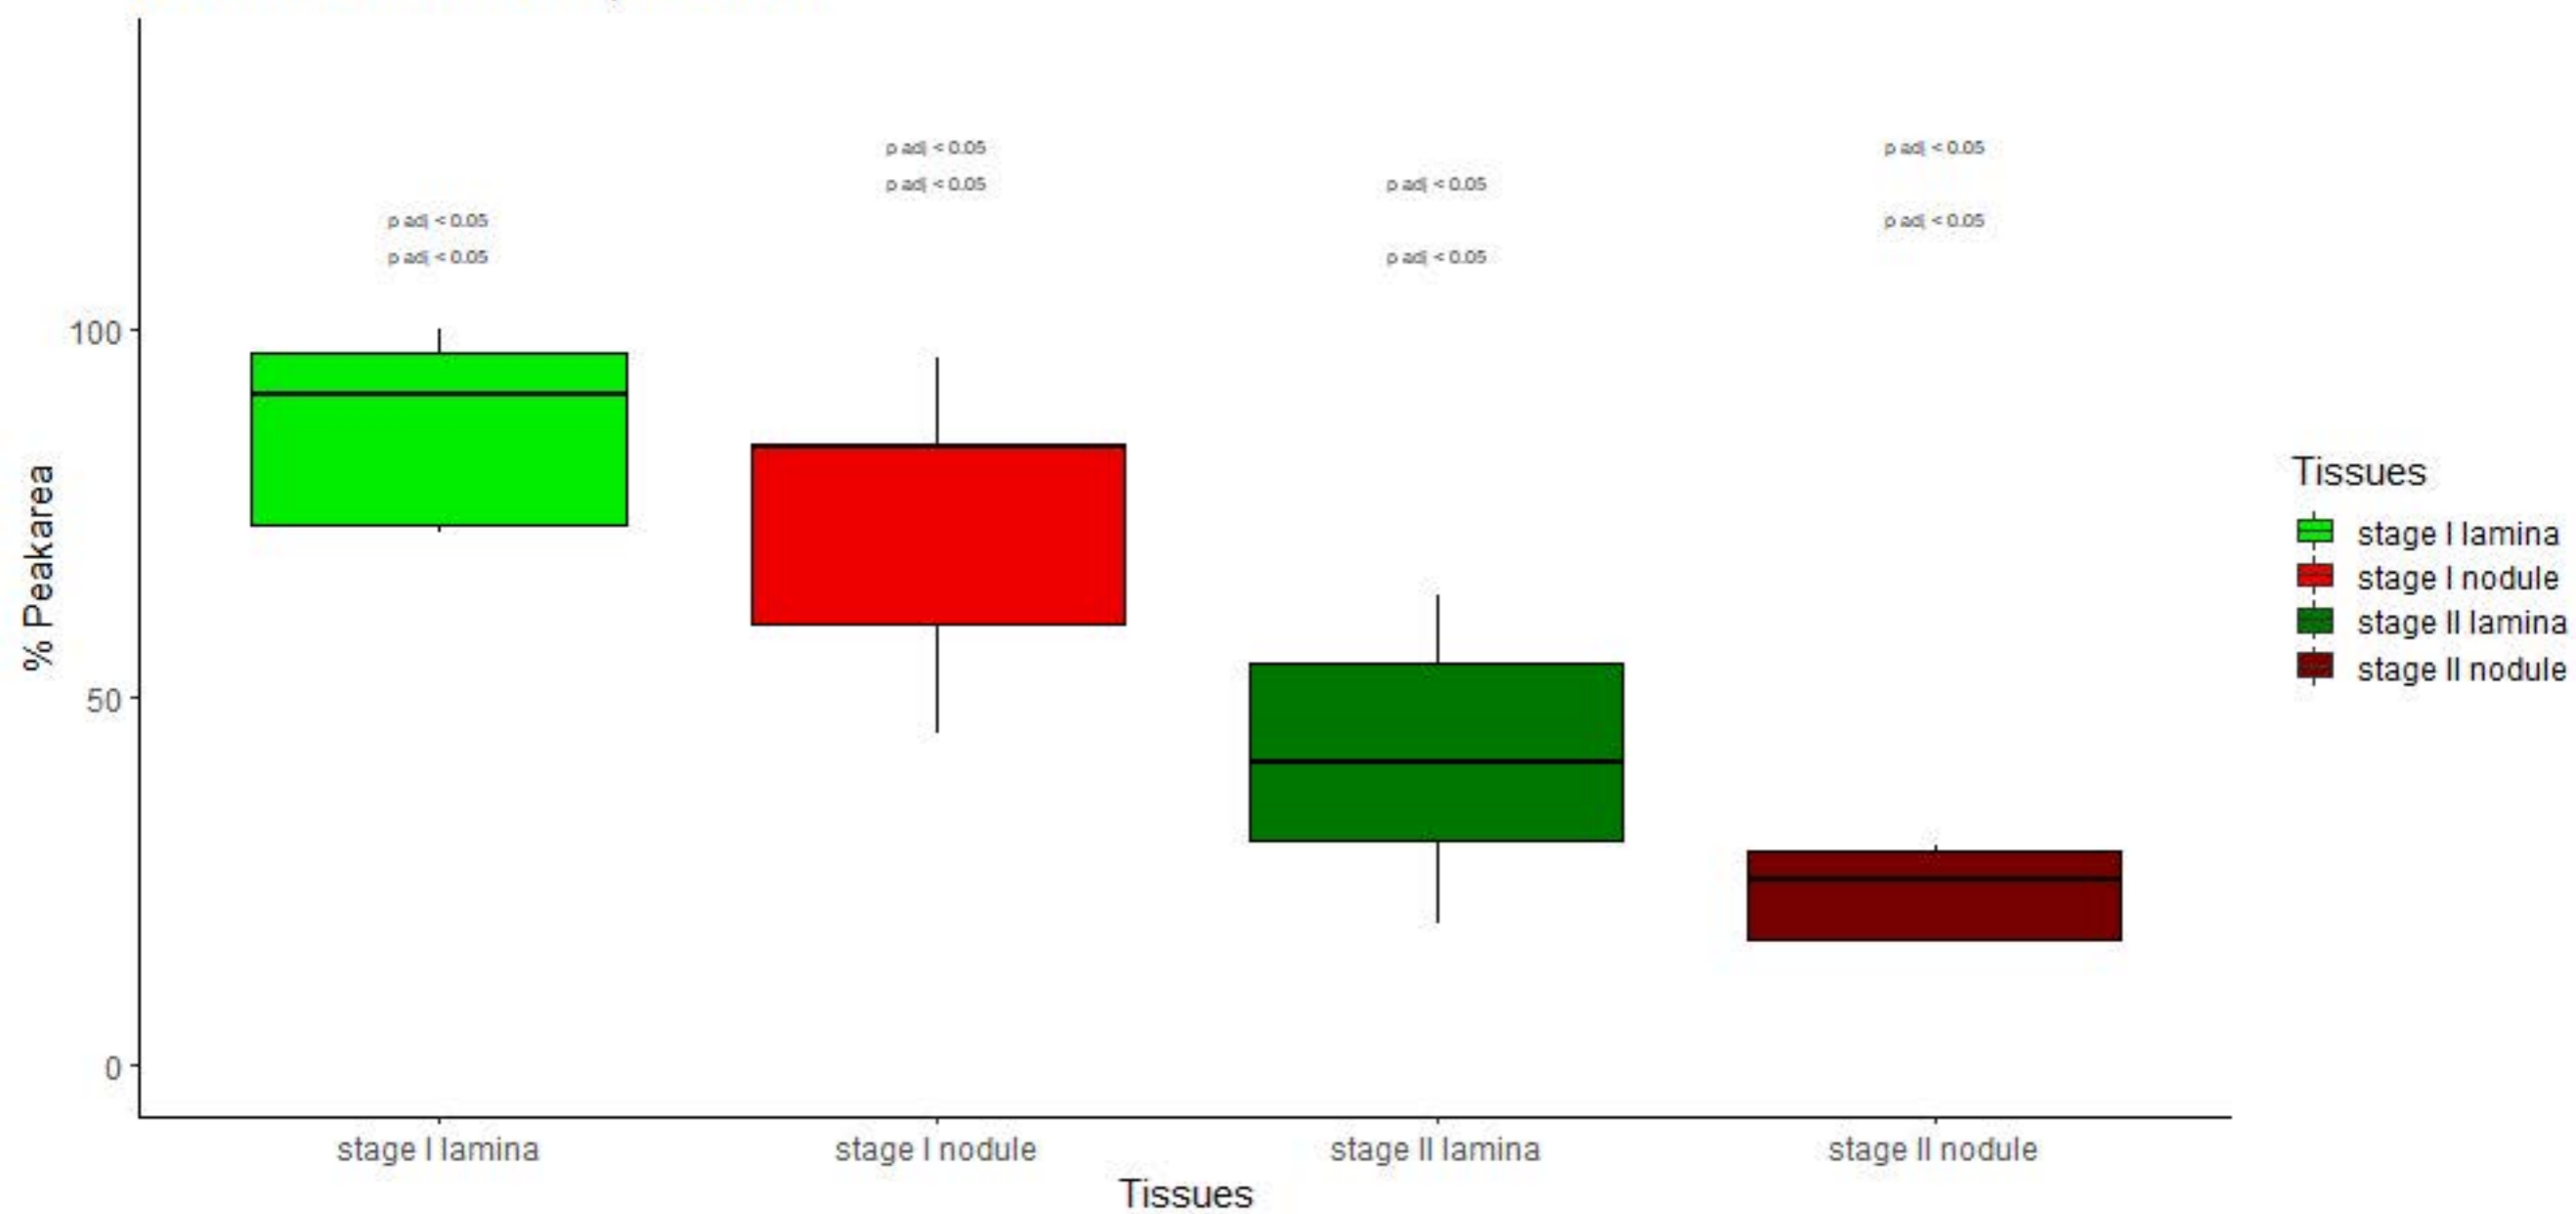

# ART Gluconic acid-1,5-lactone

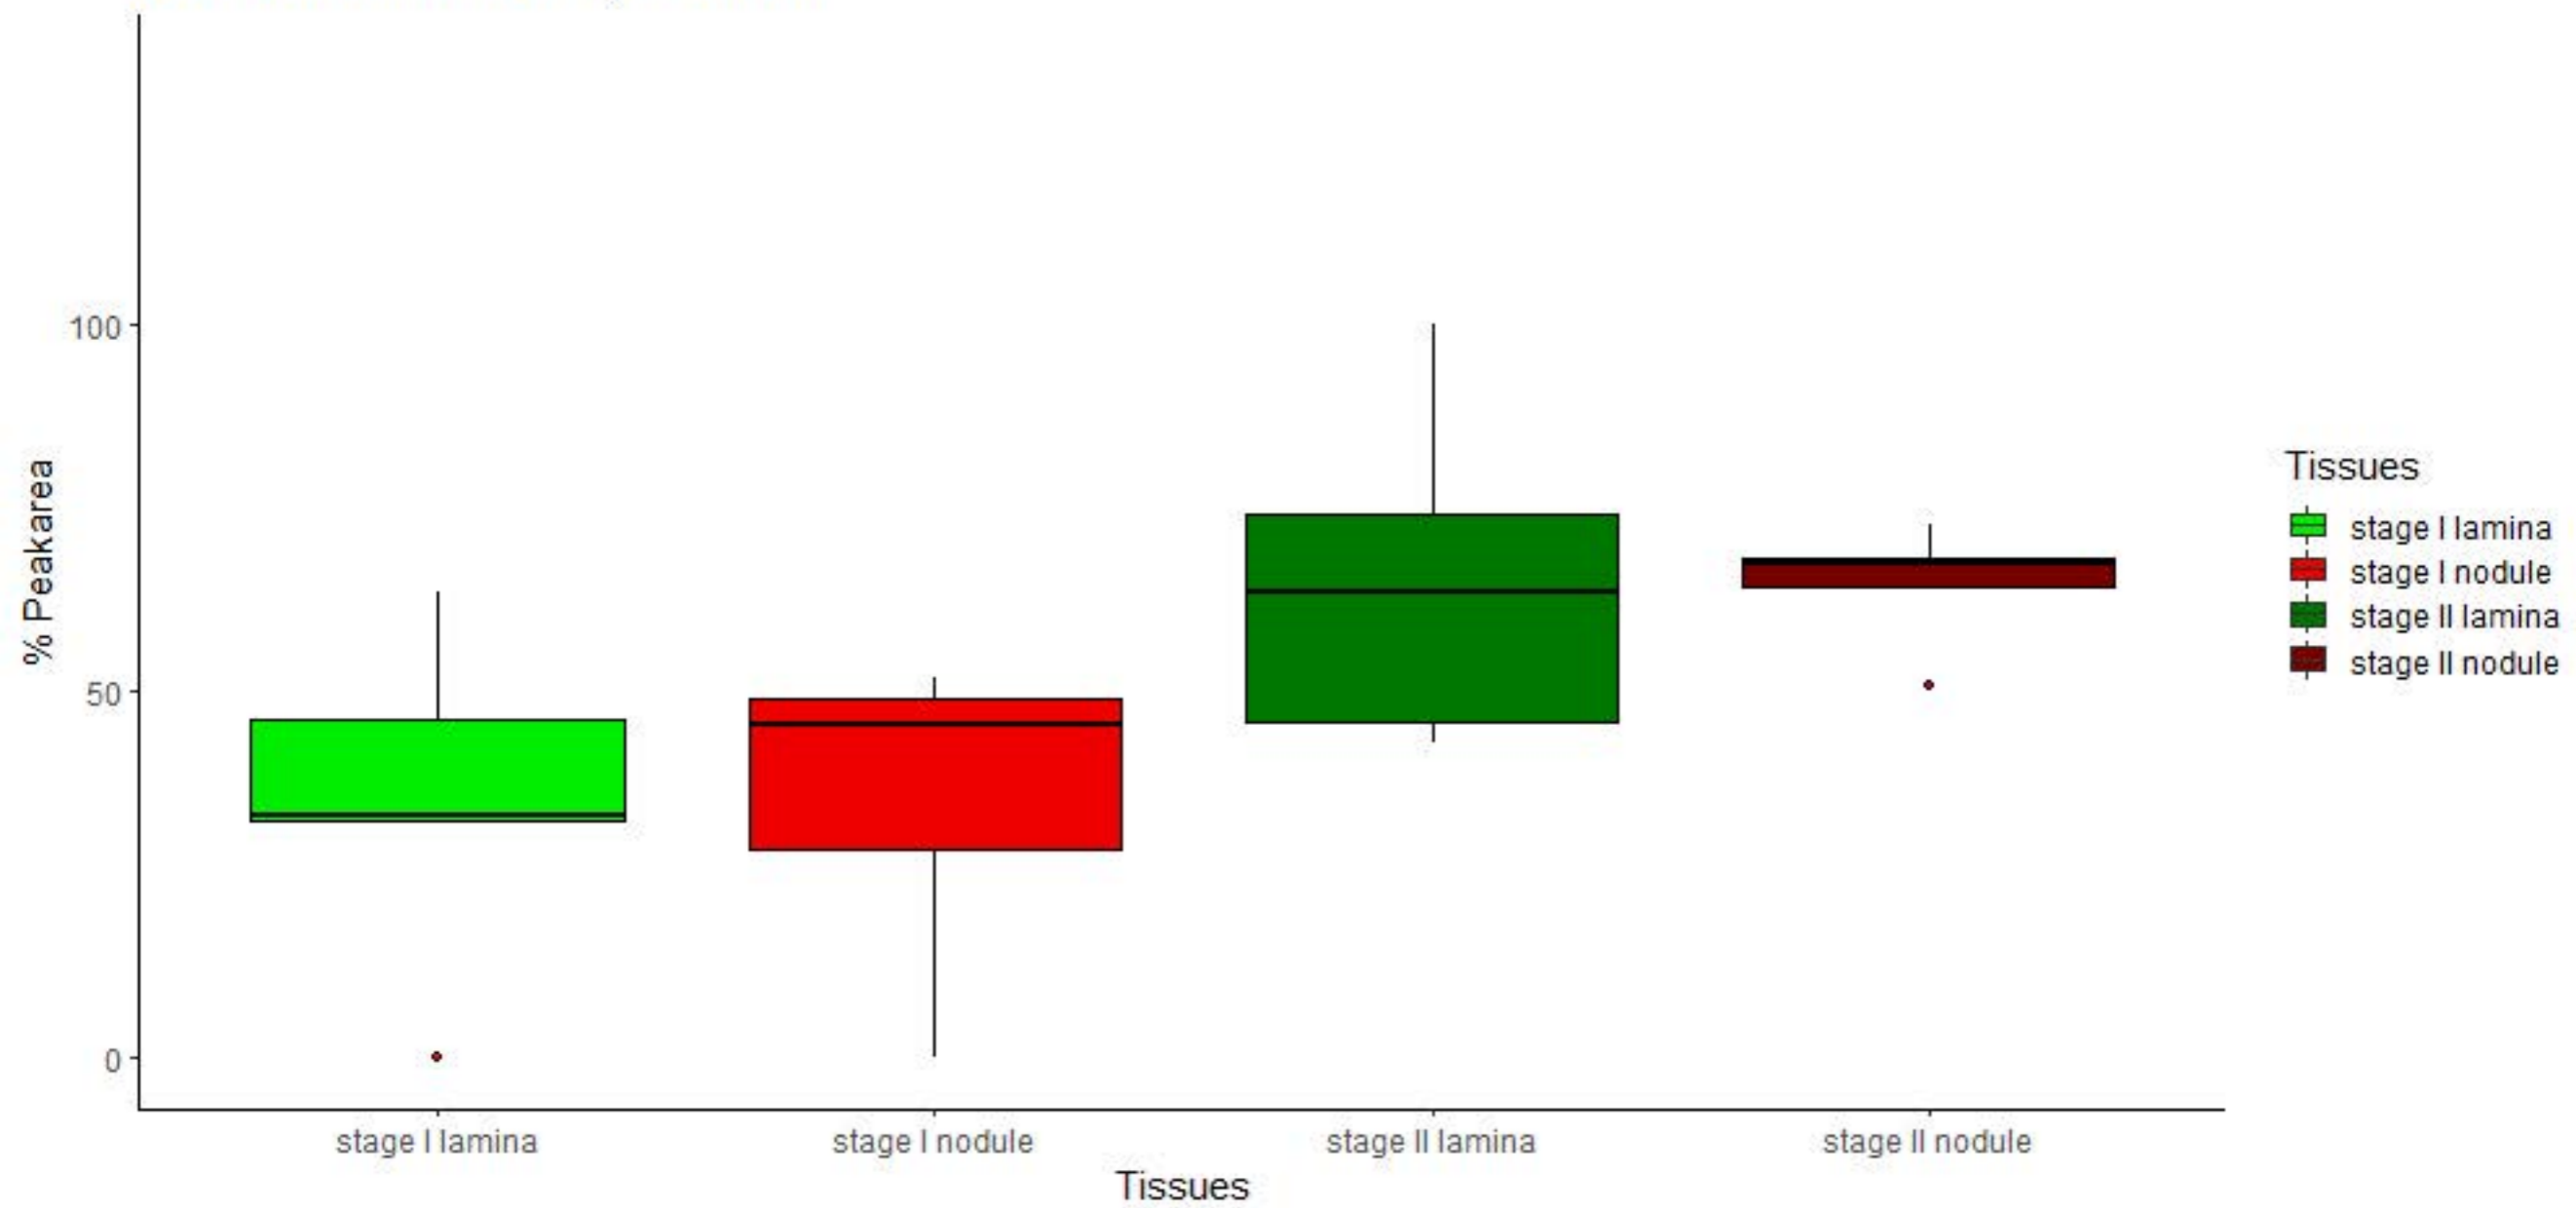

# Hexonic acid 1

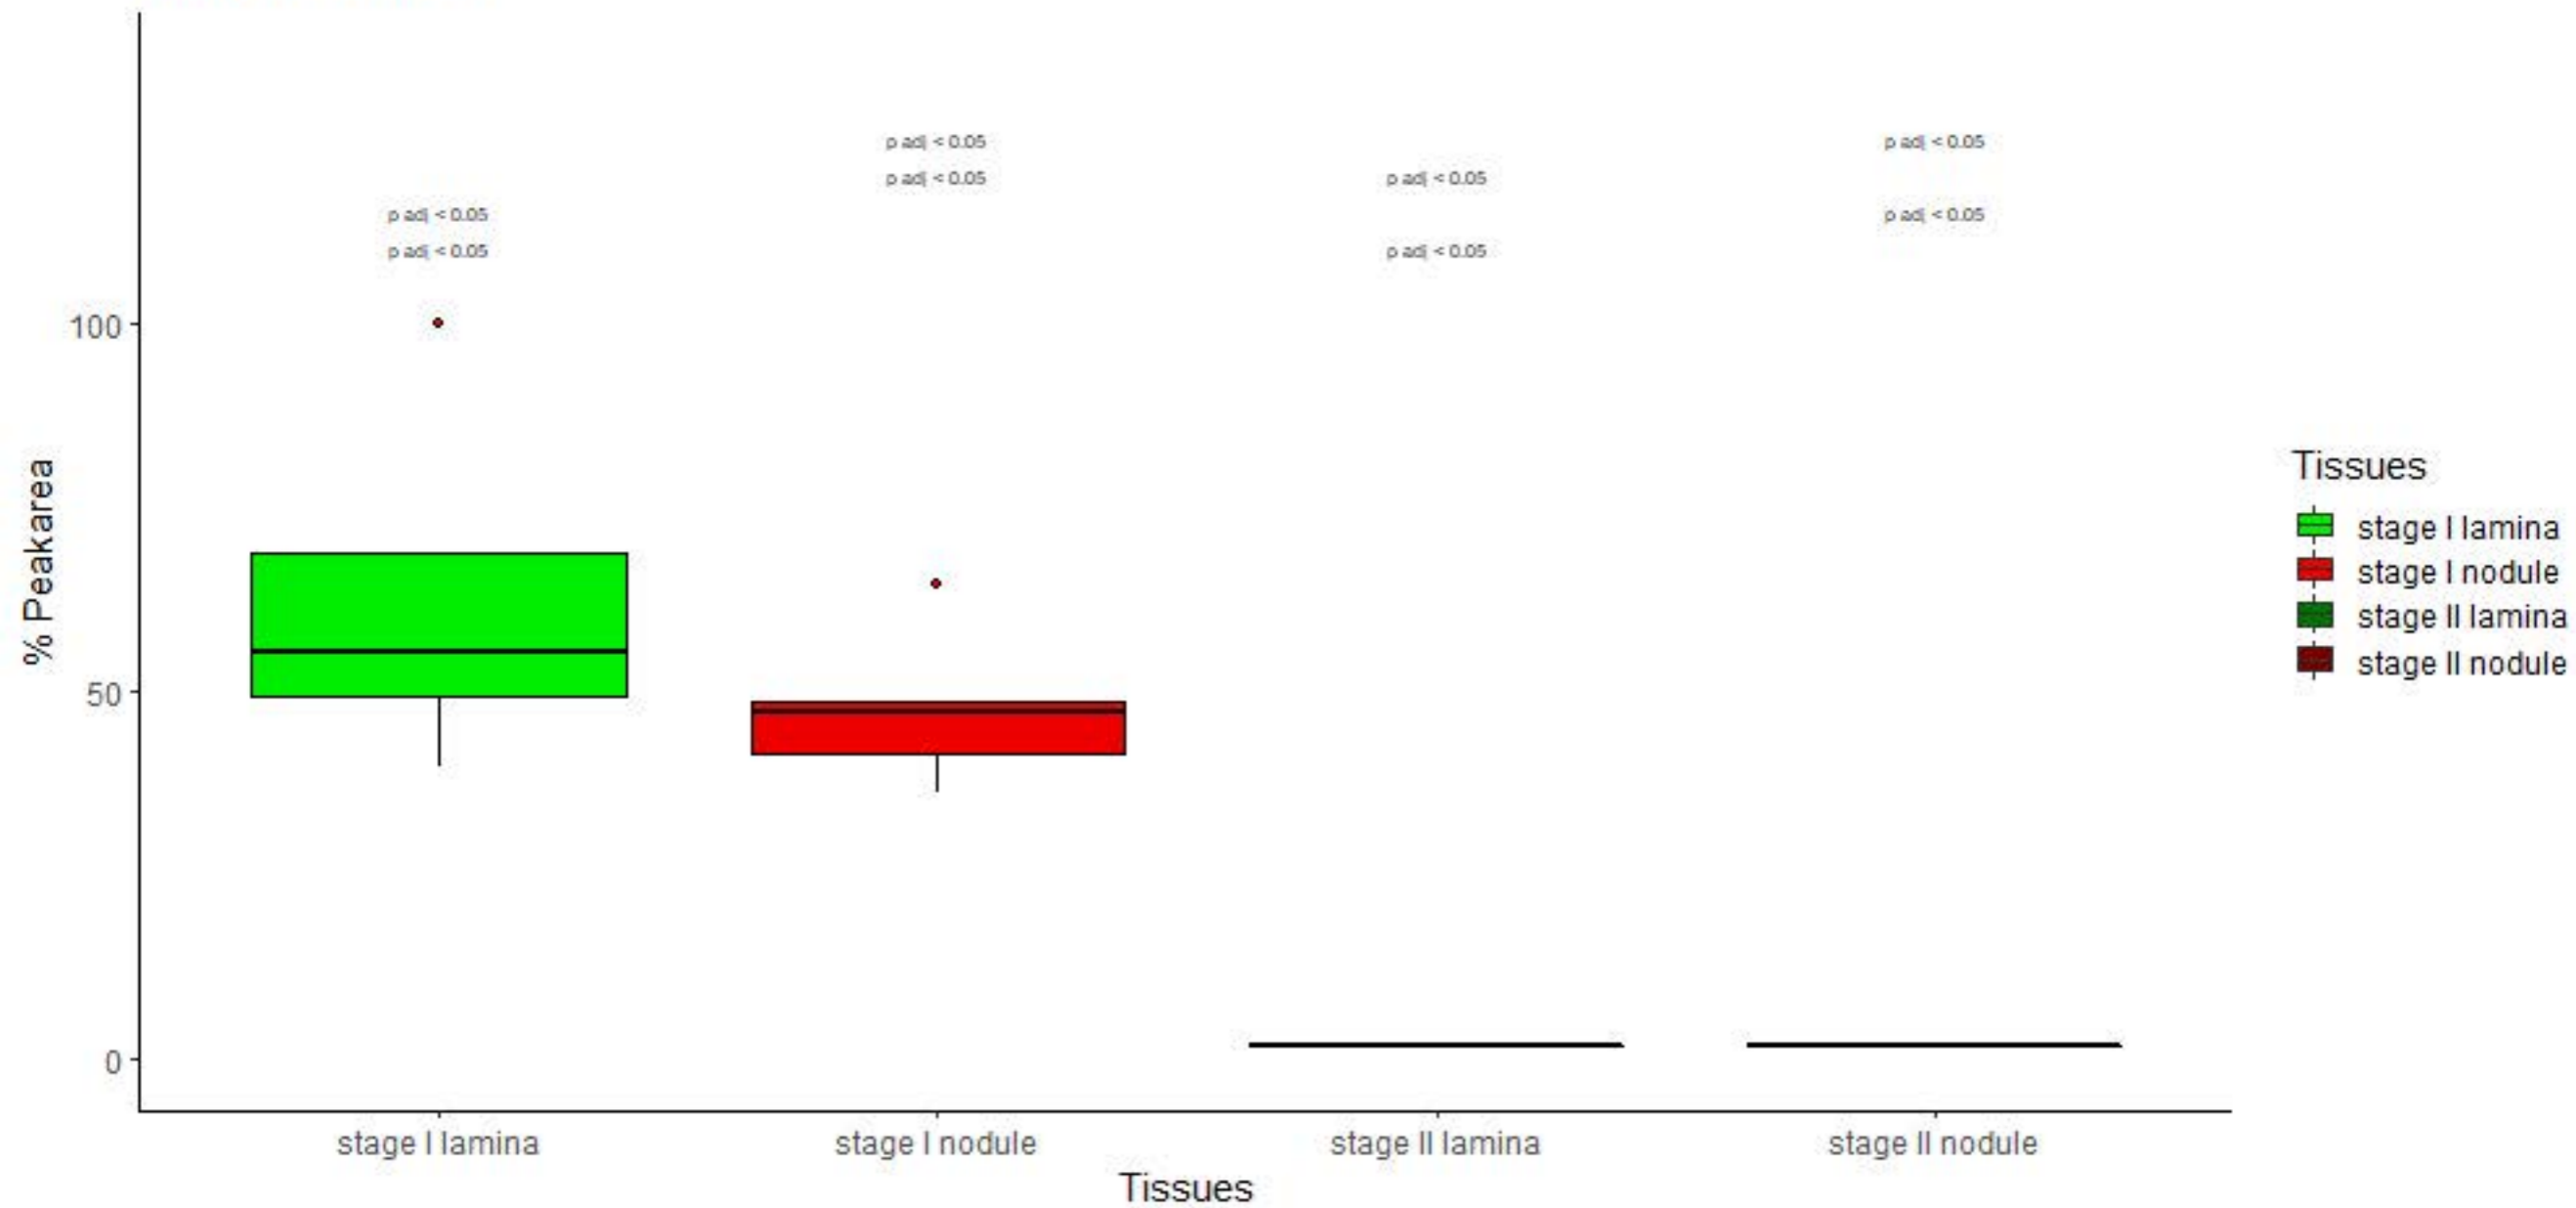

# Hexonic acid 2

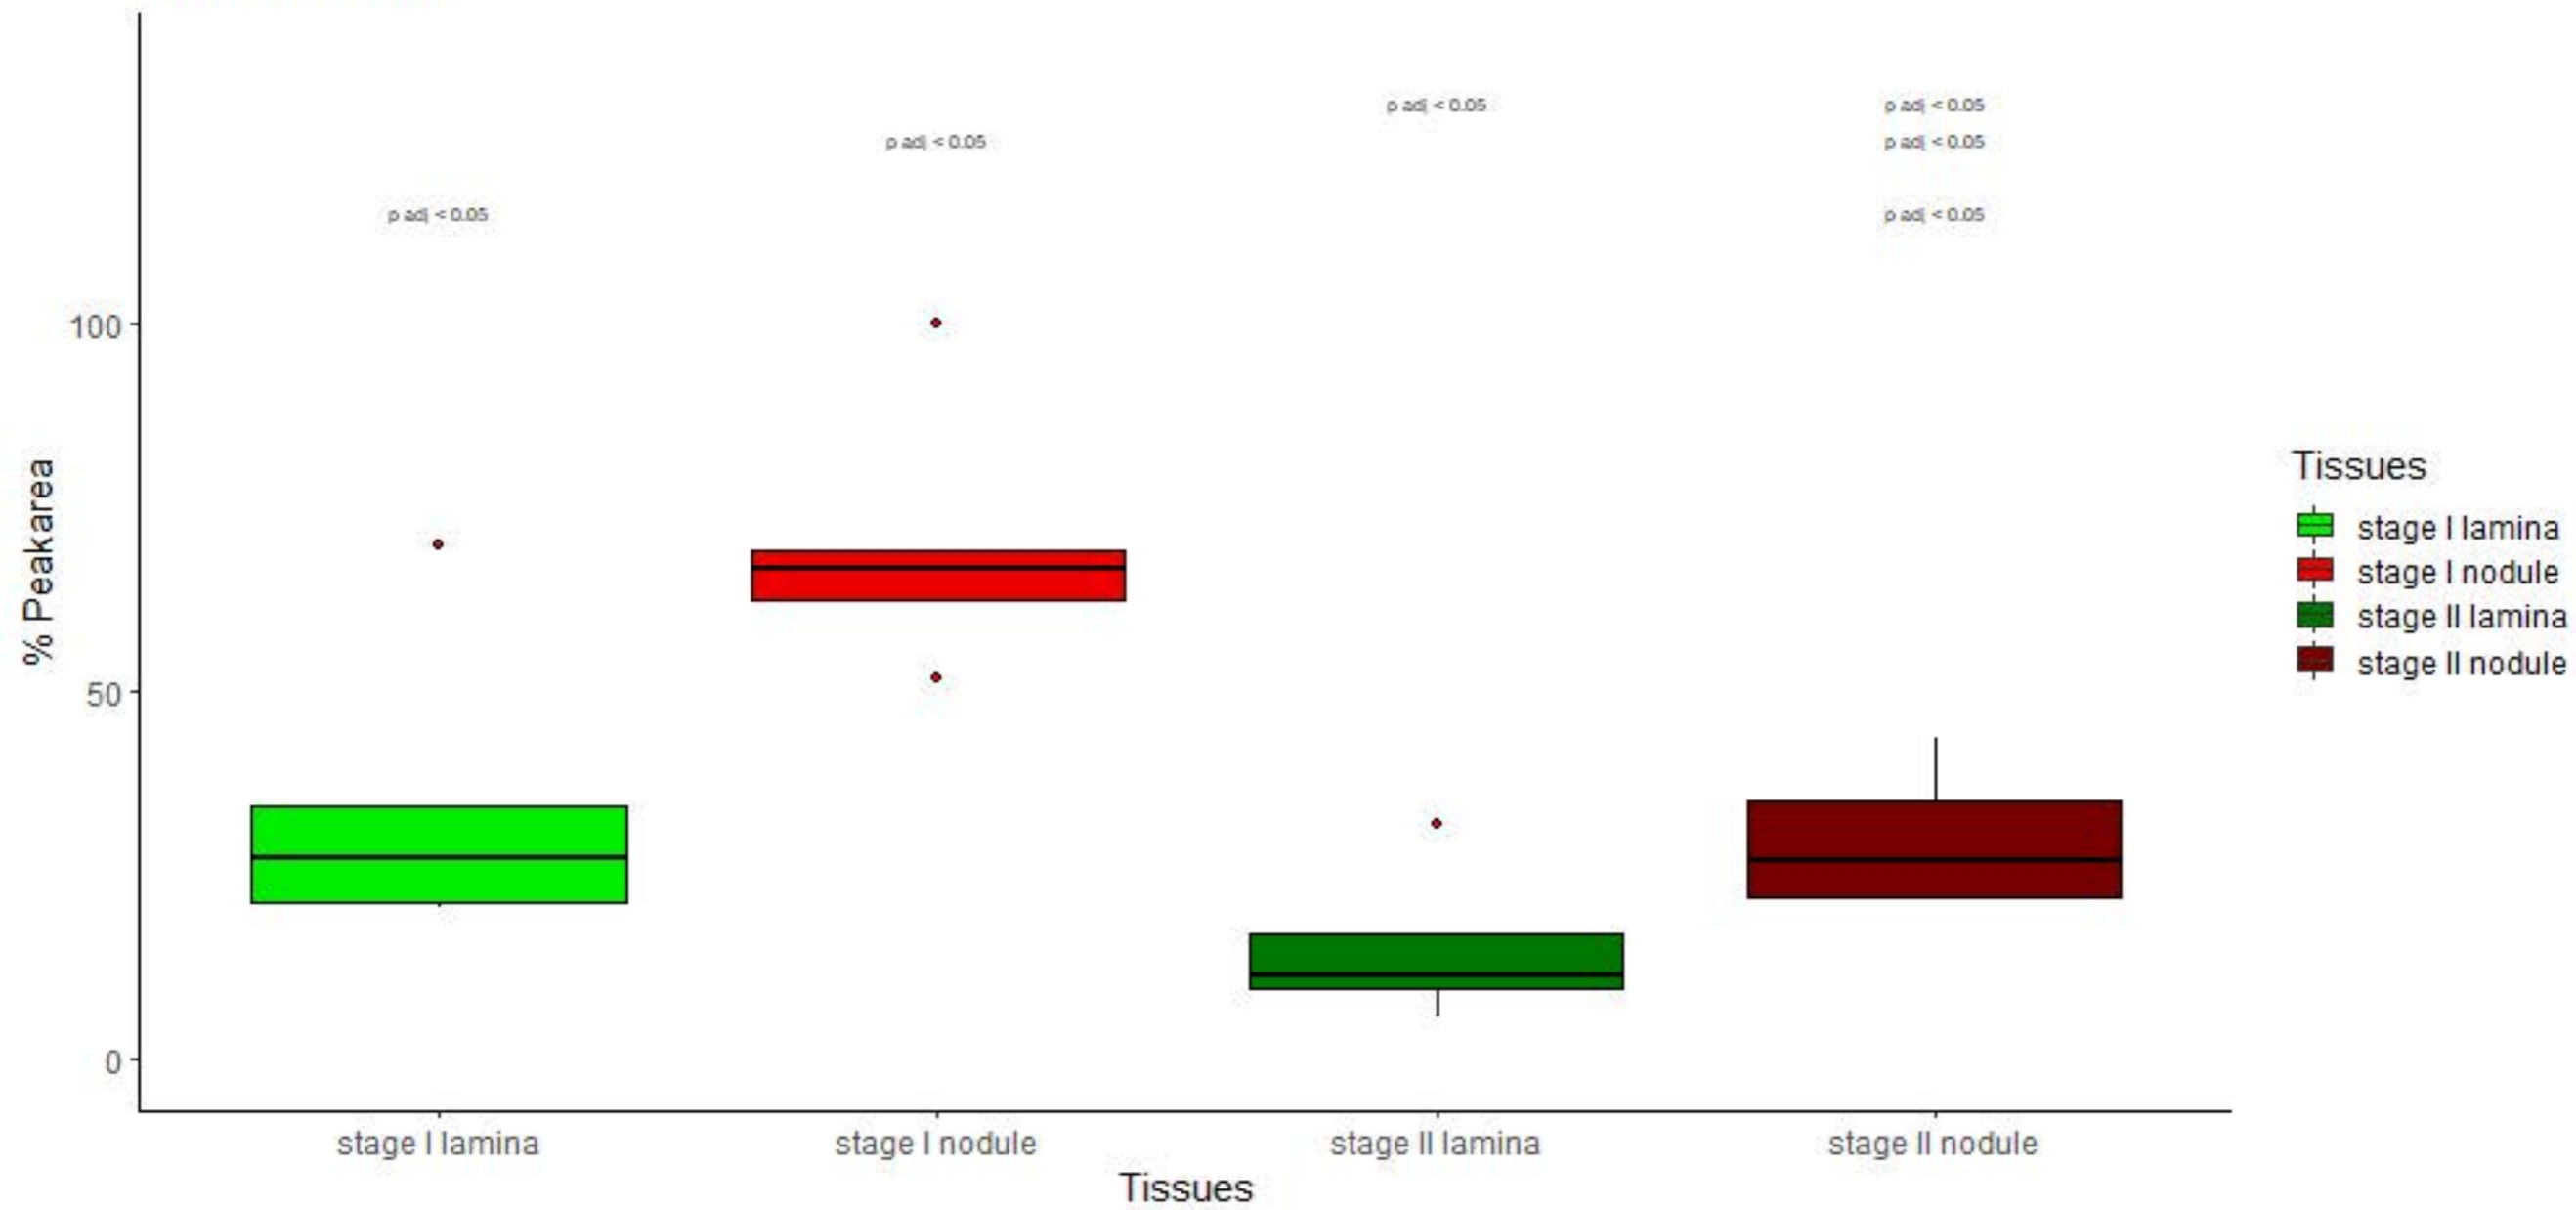



# Fructose

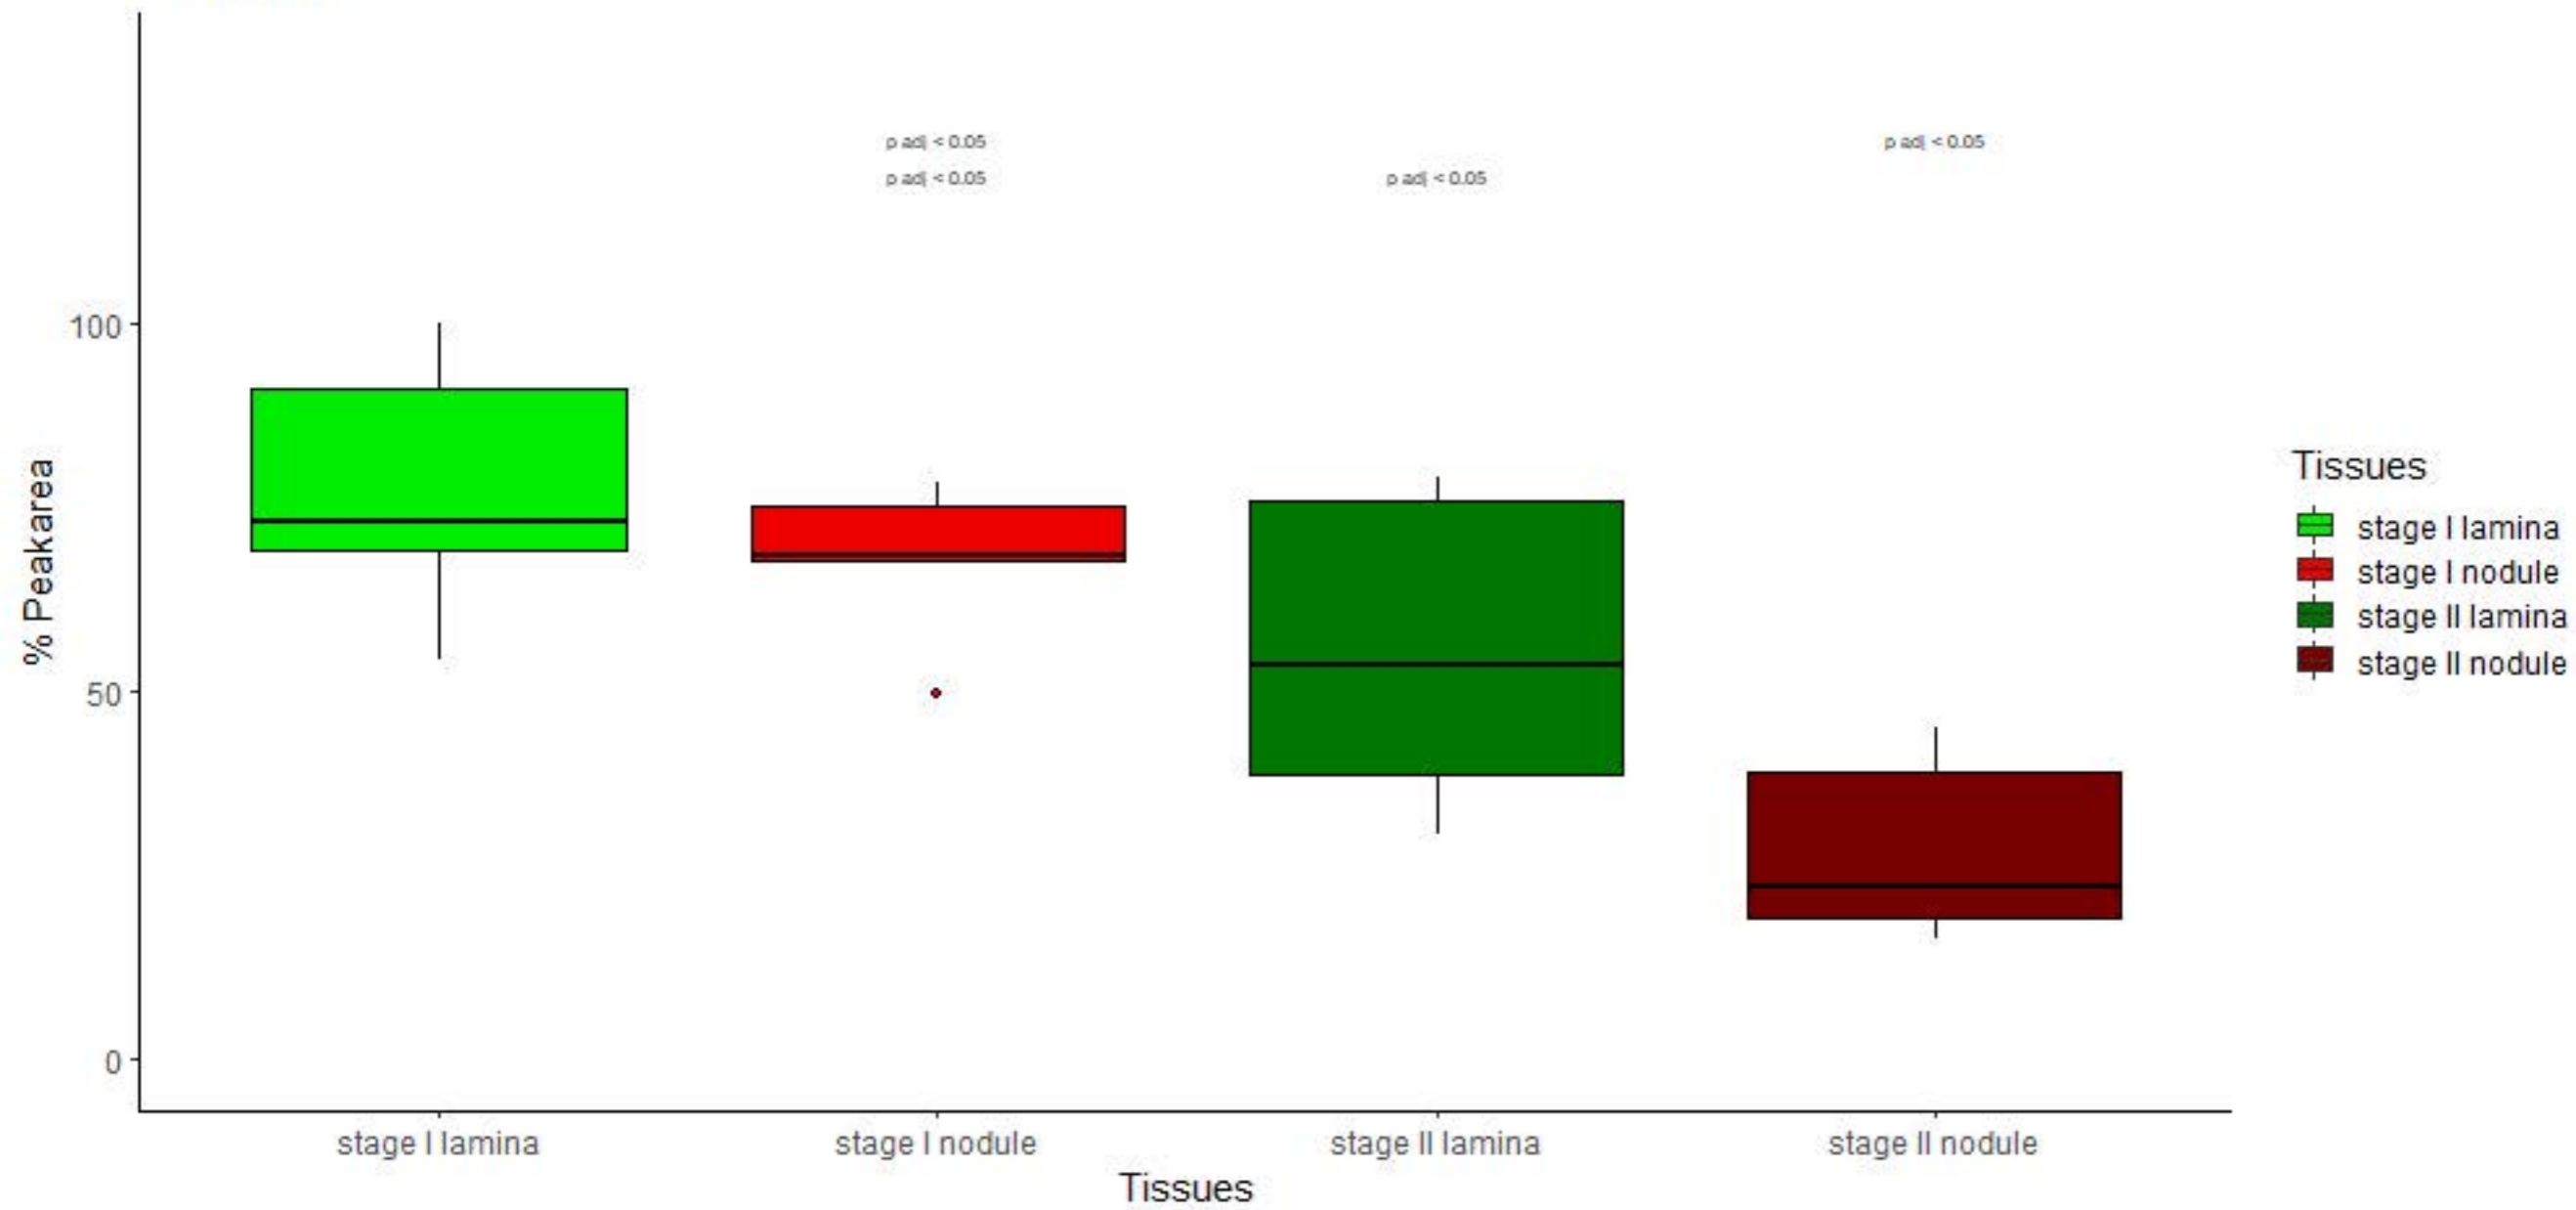

# Glucose

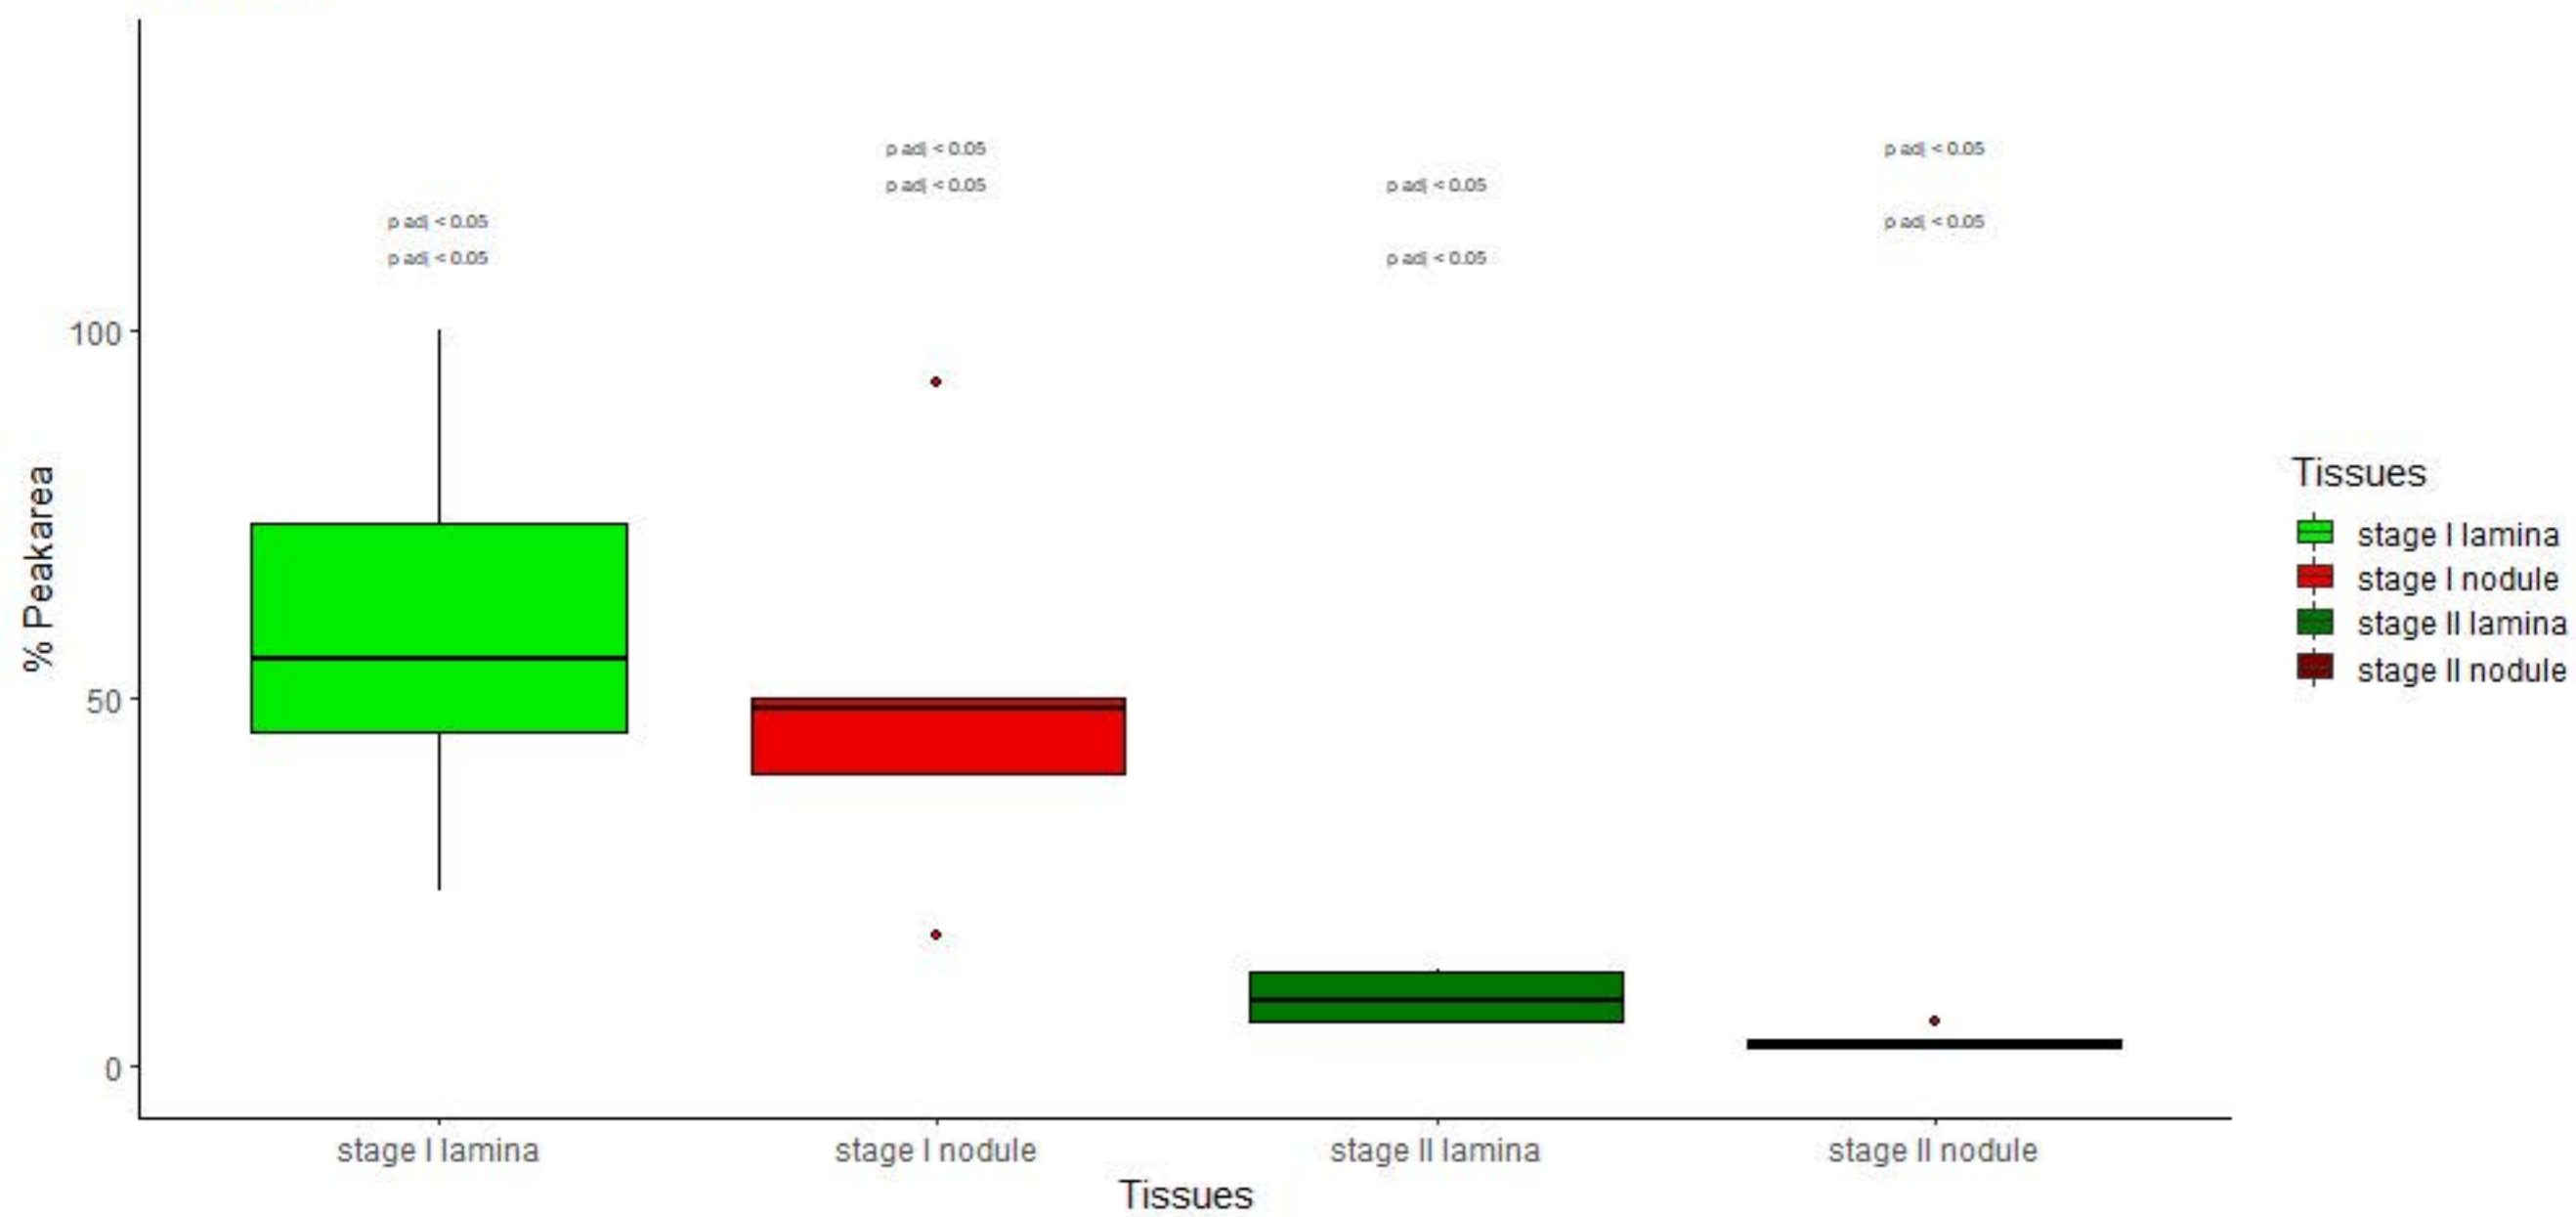

# Sucrose S50

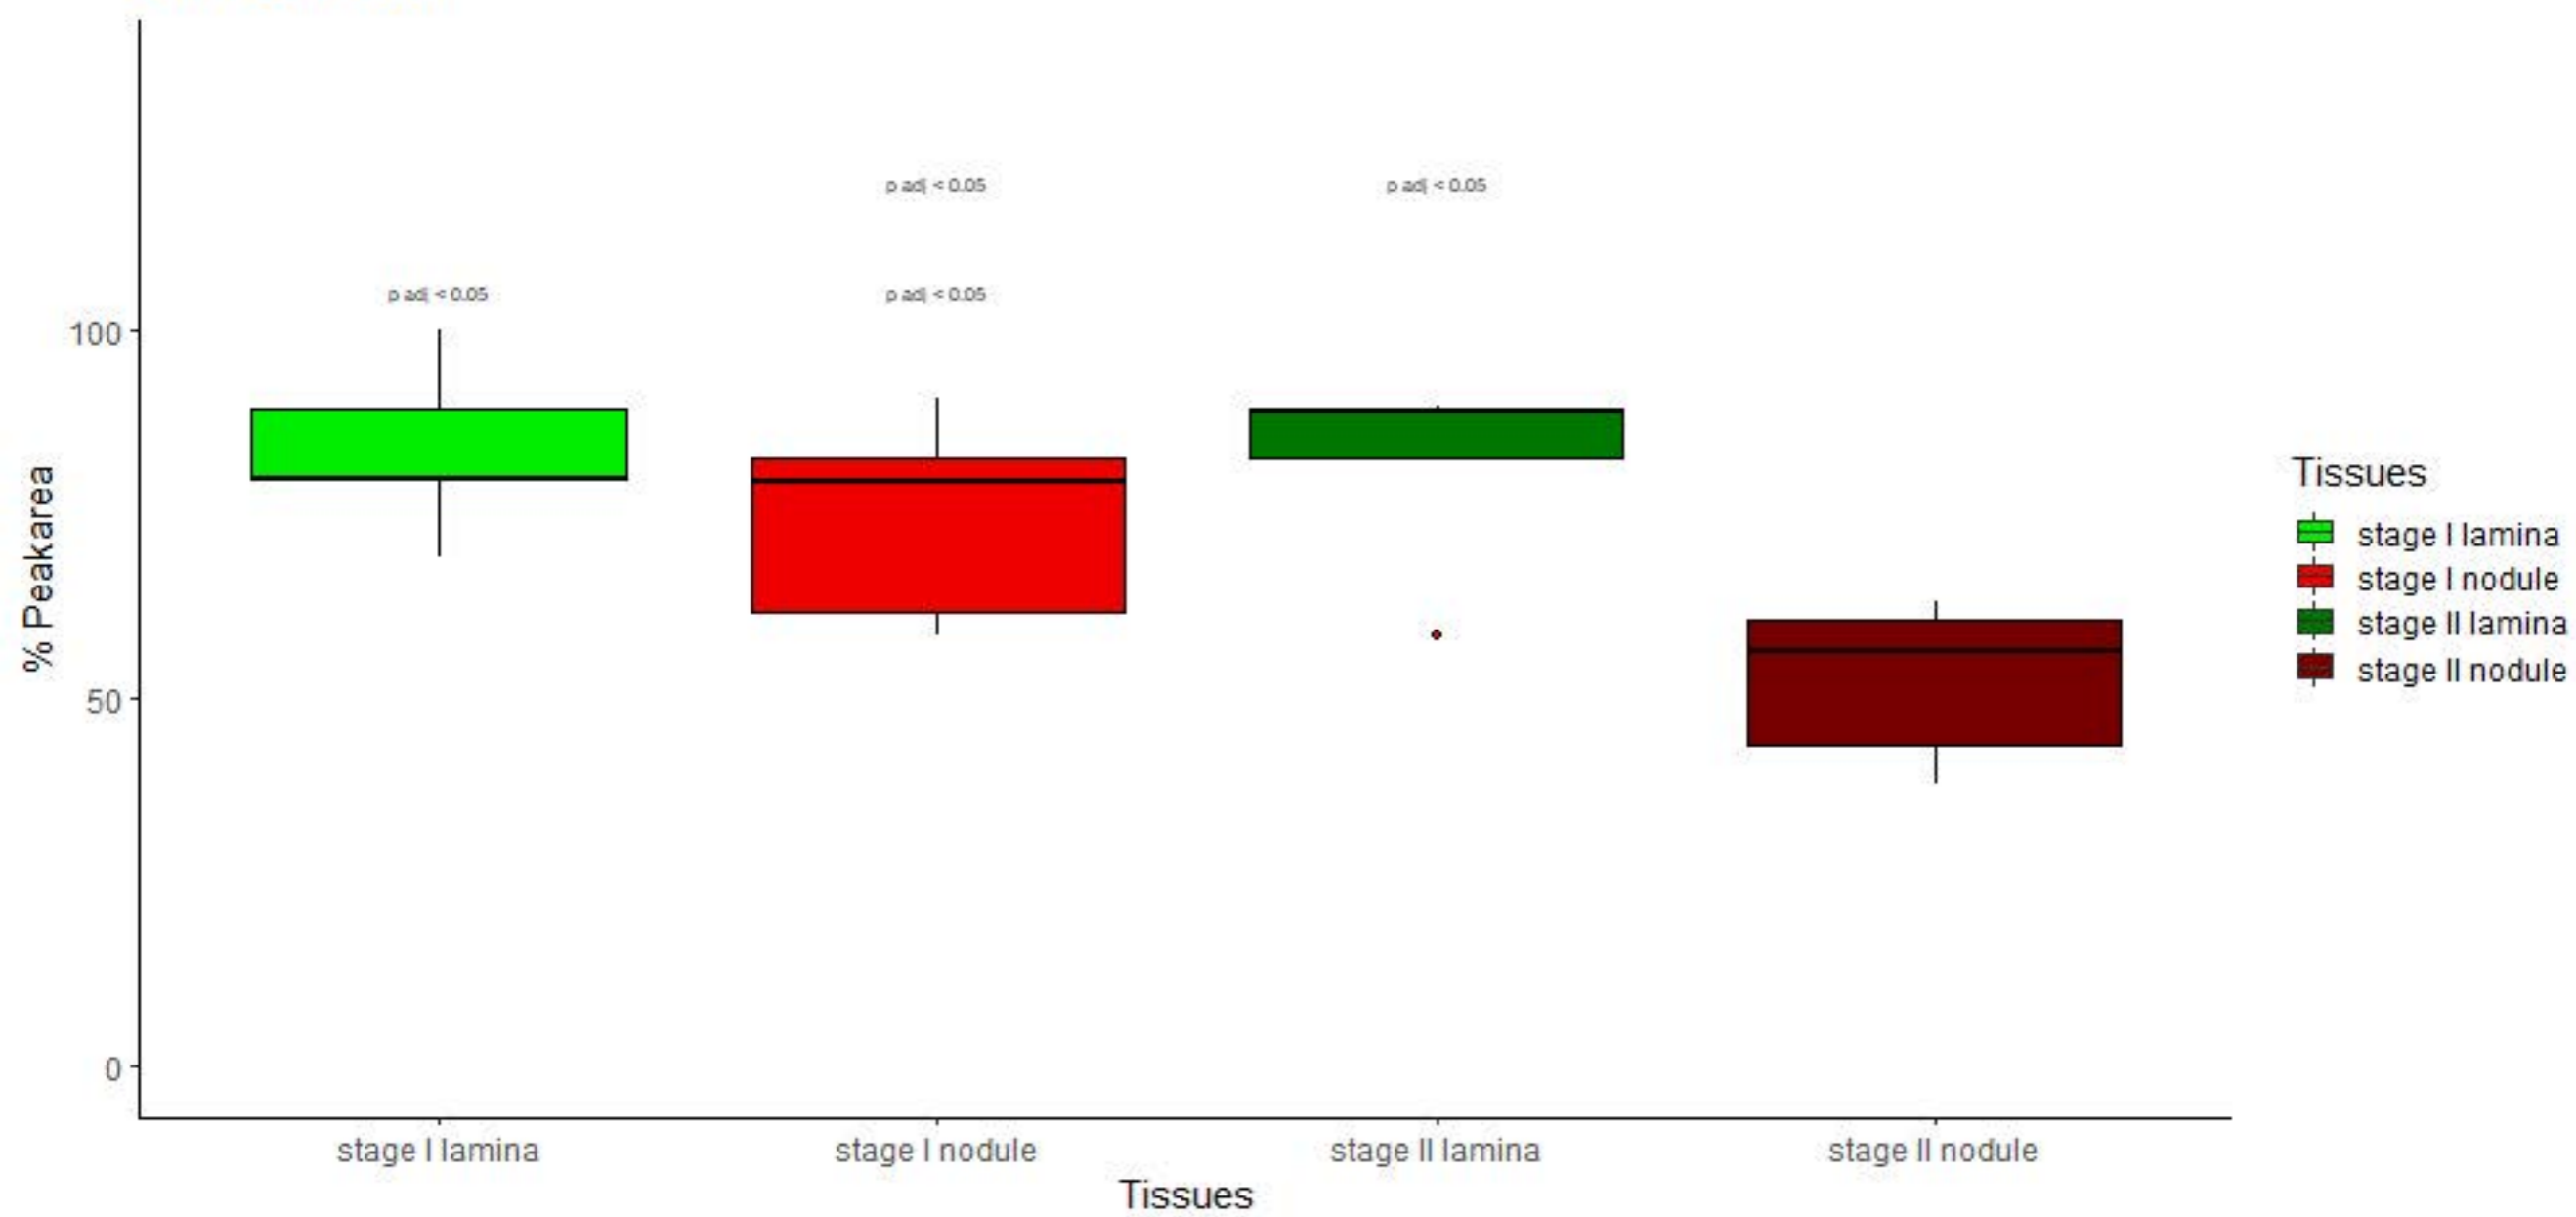

# Maltose

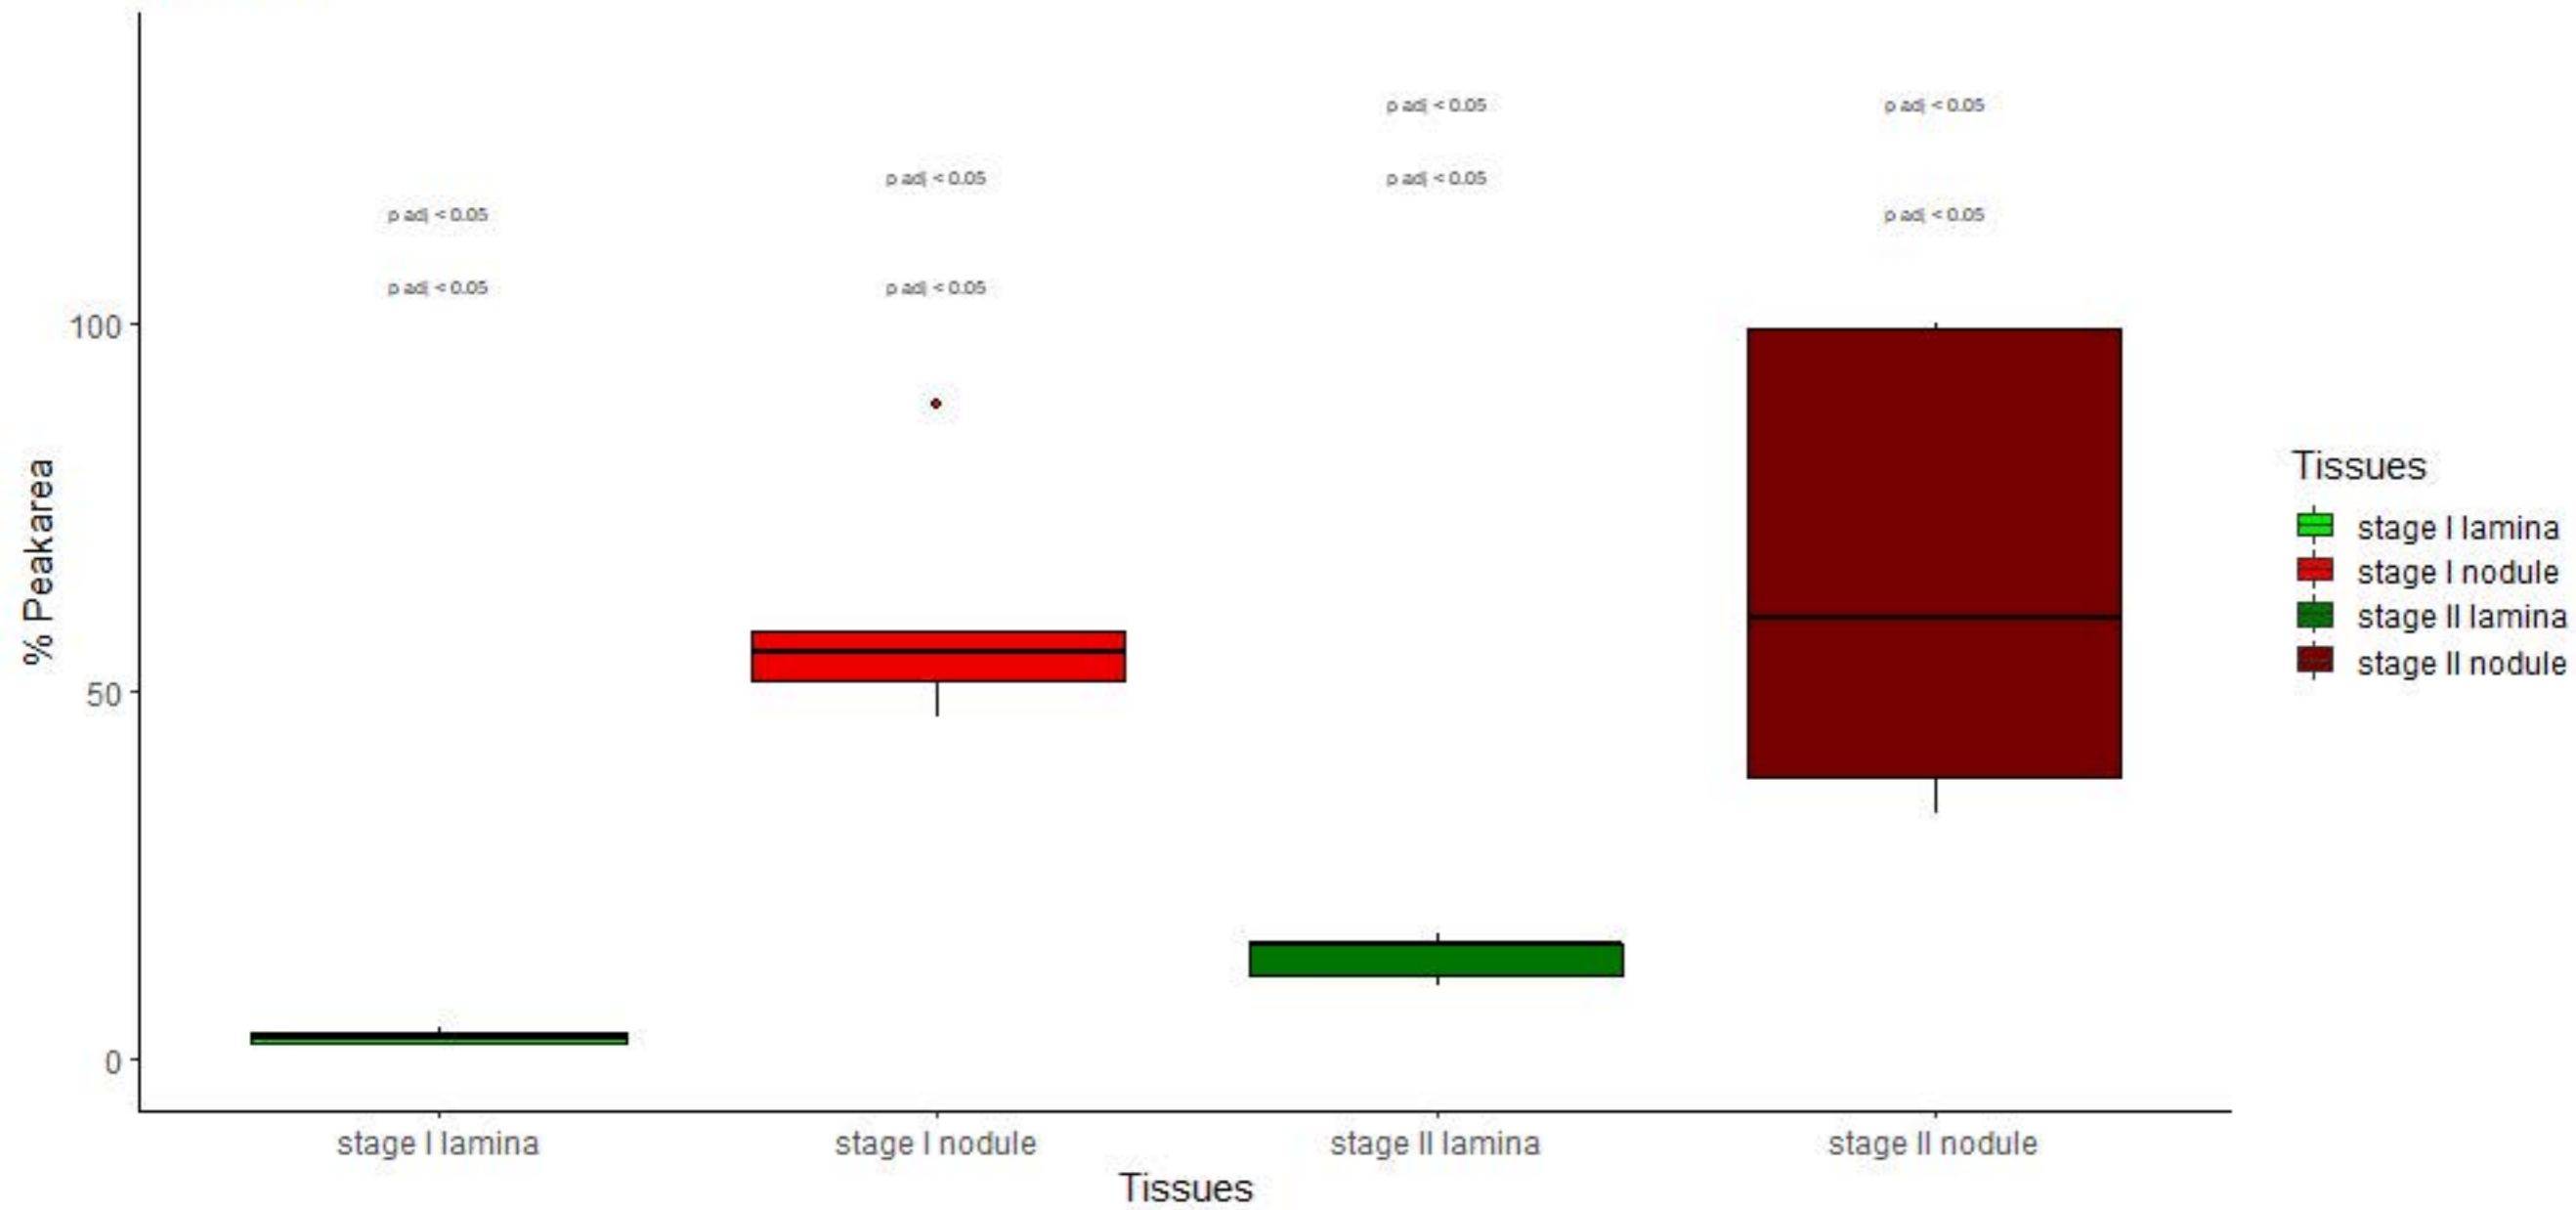

# Trehalose S50

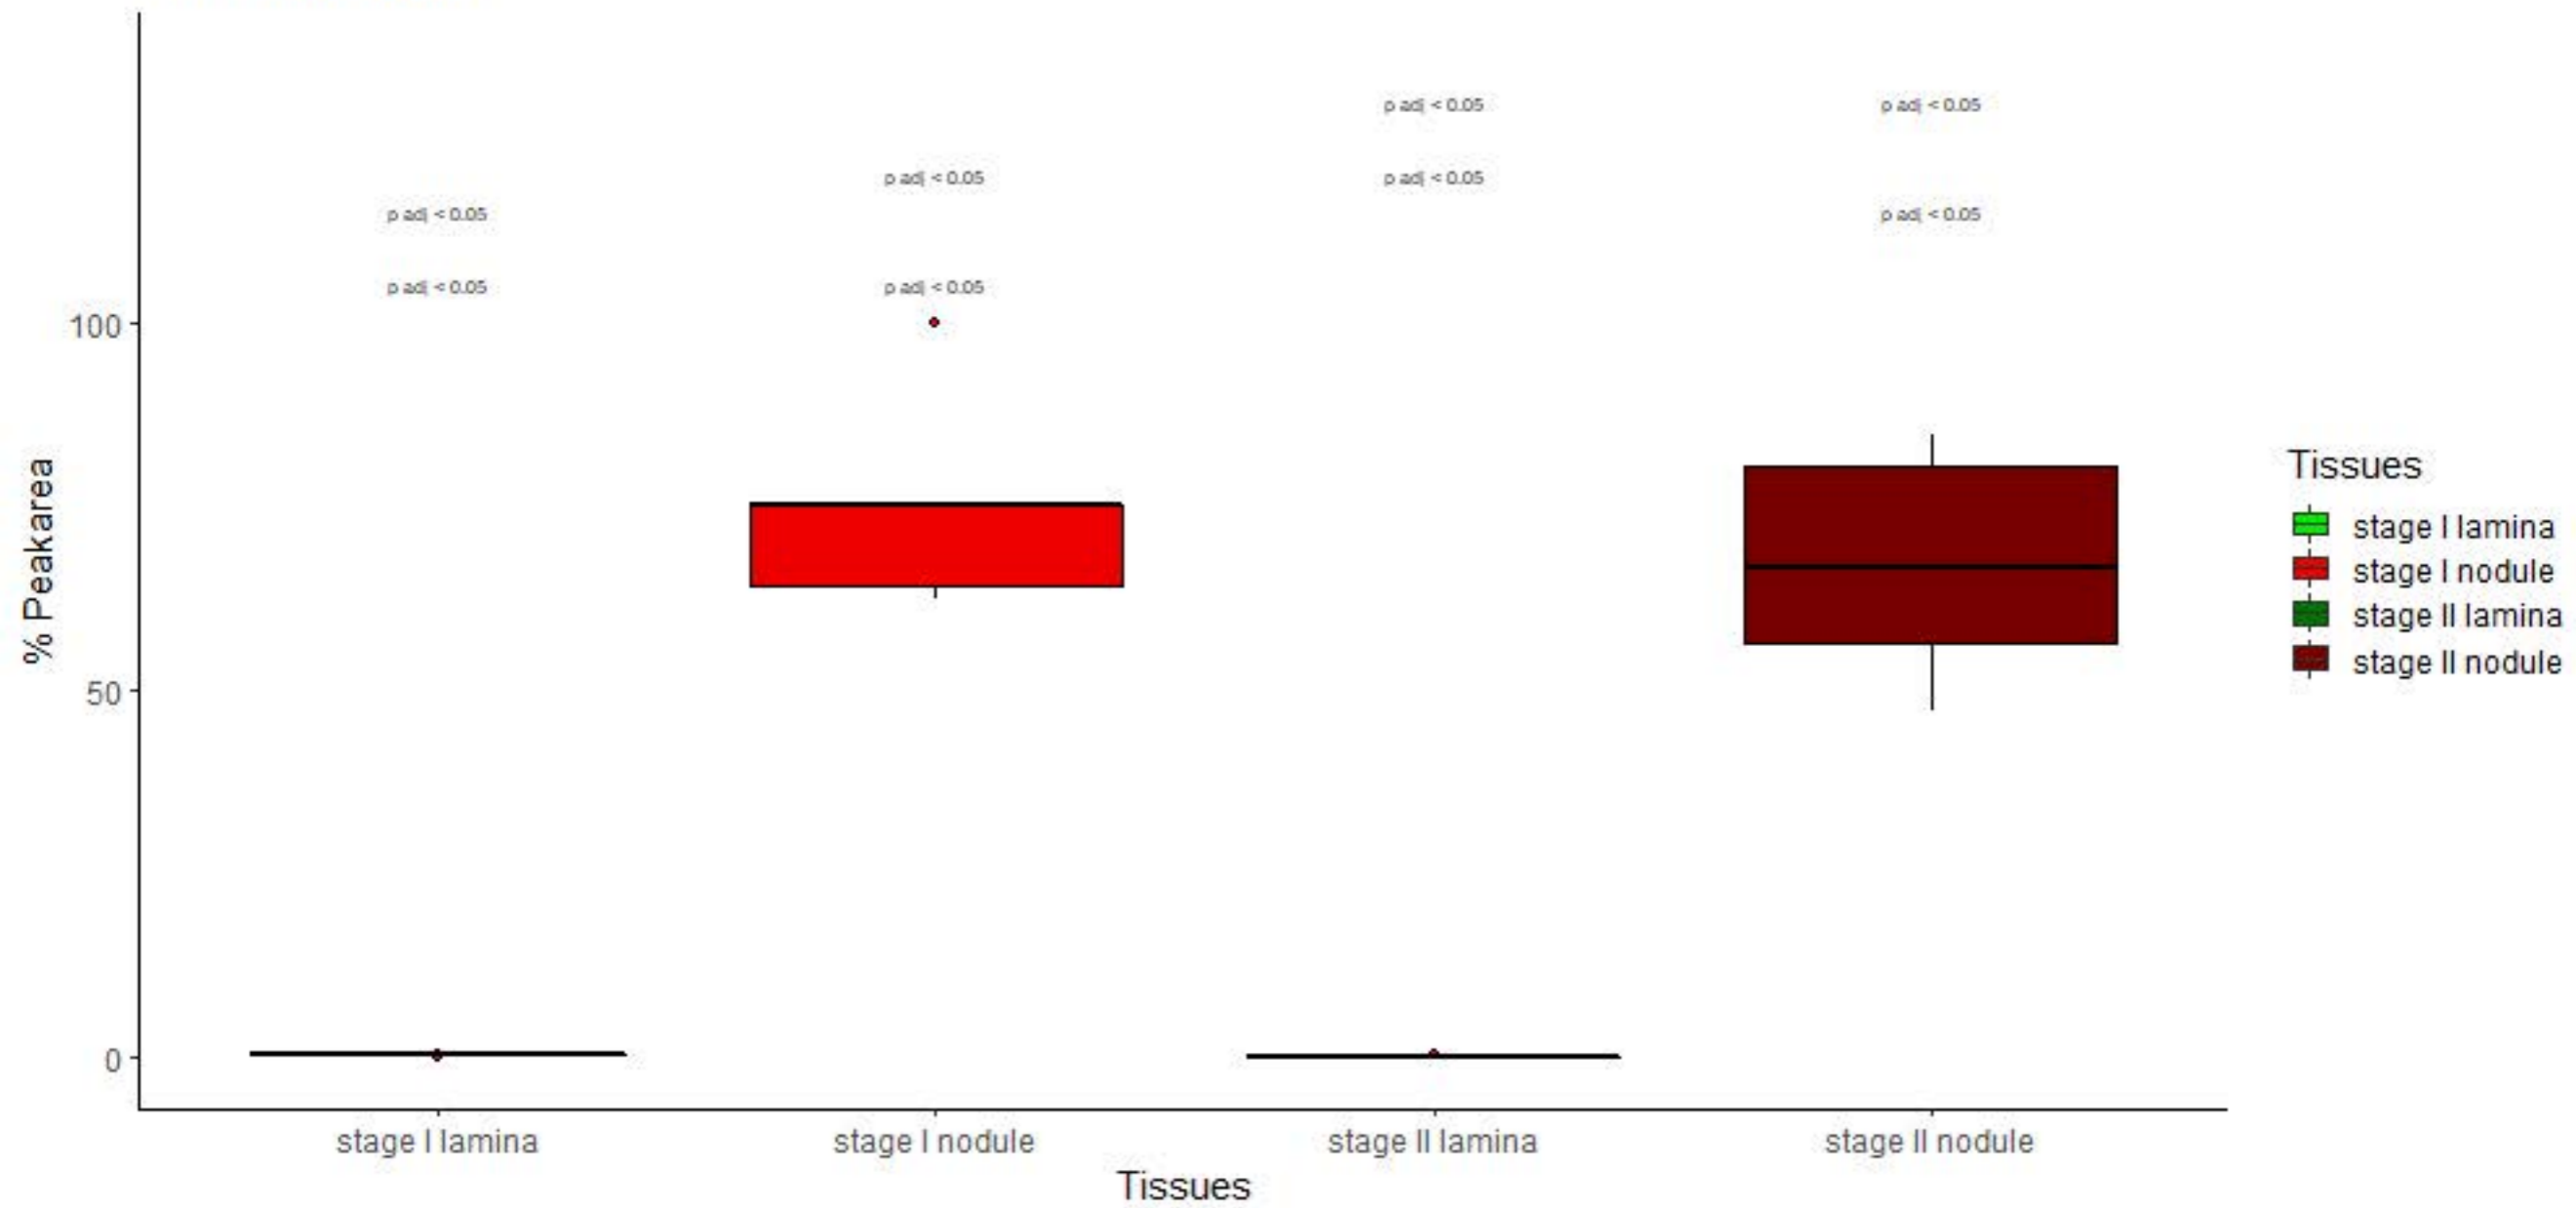

# Rhamnose/Fucose Product

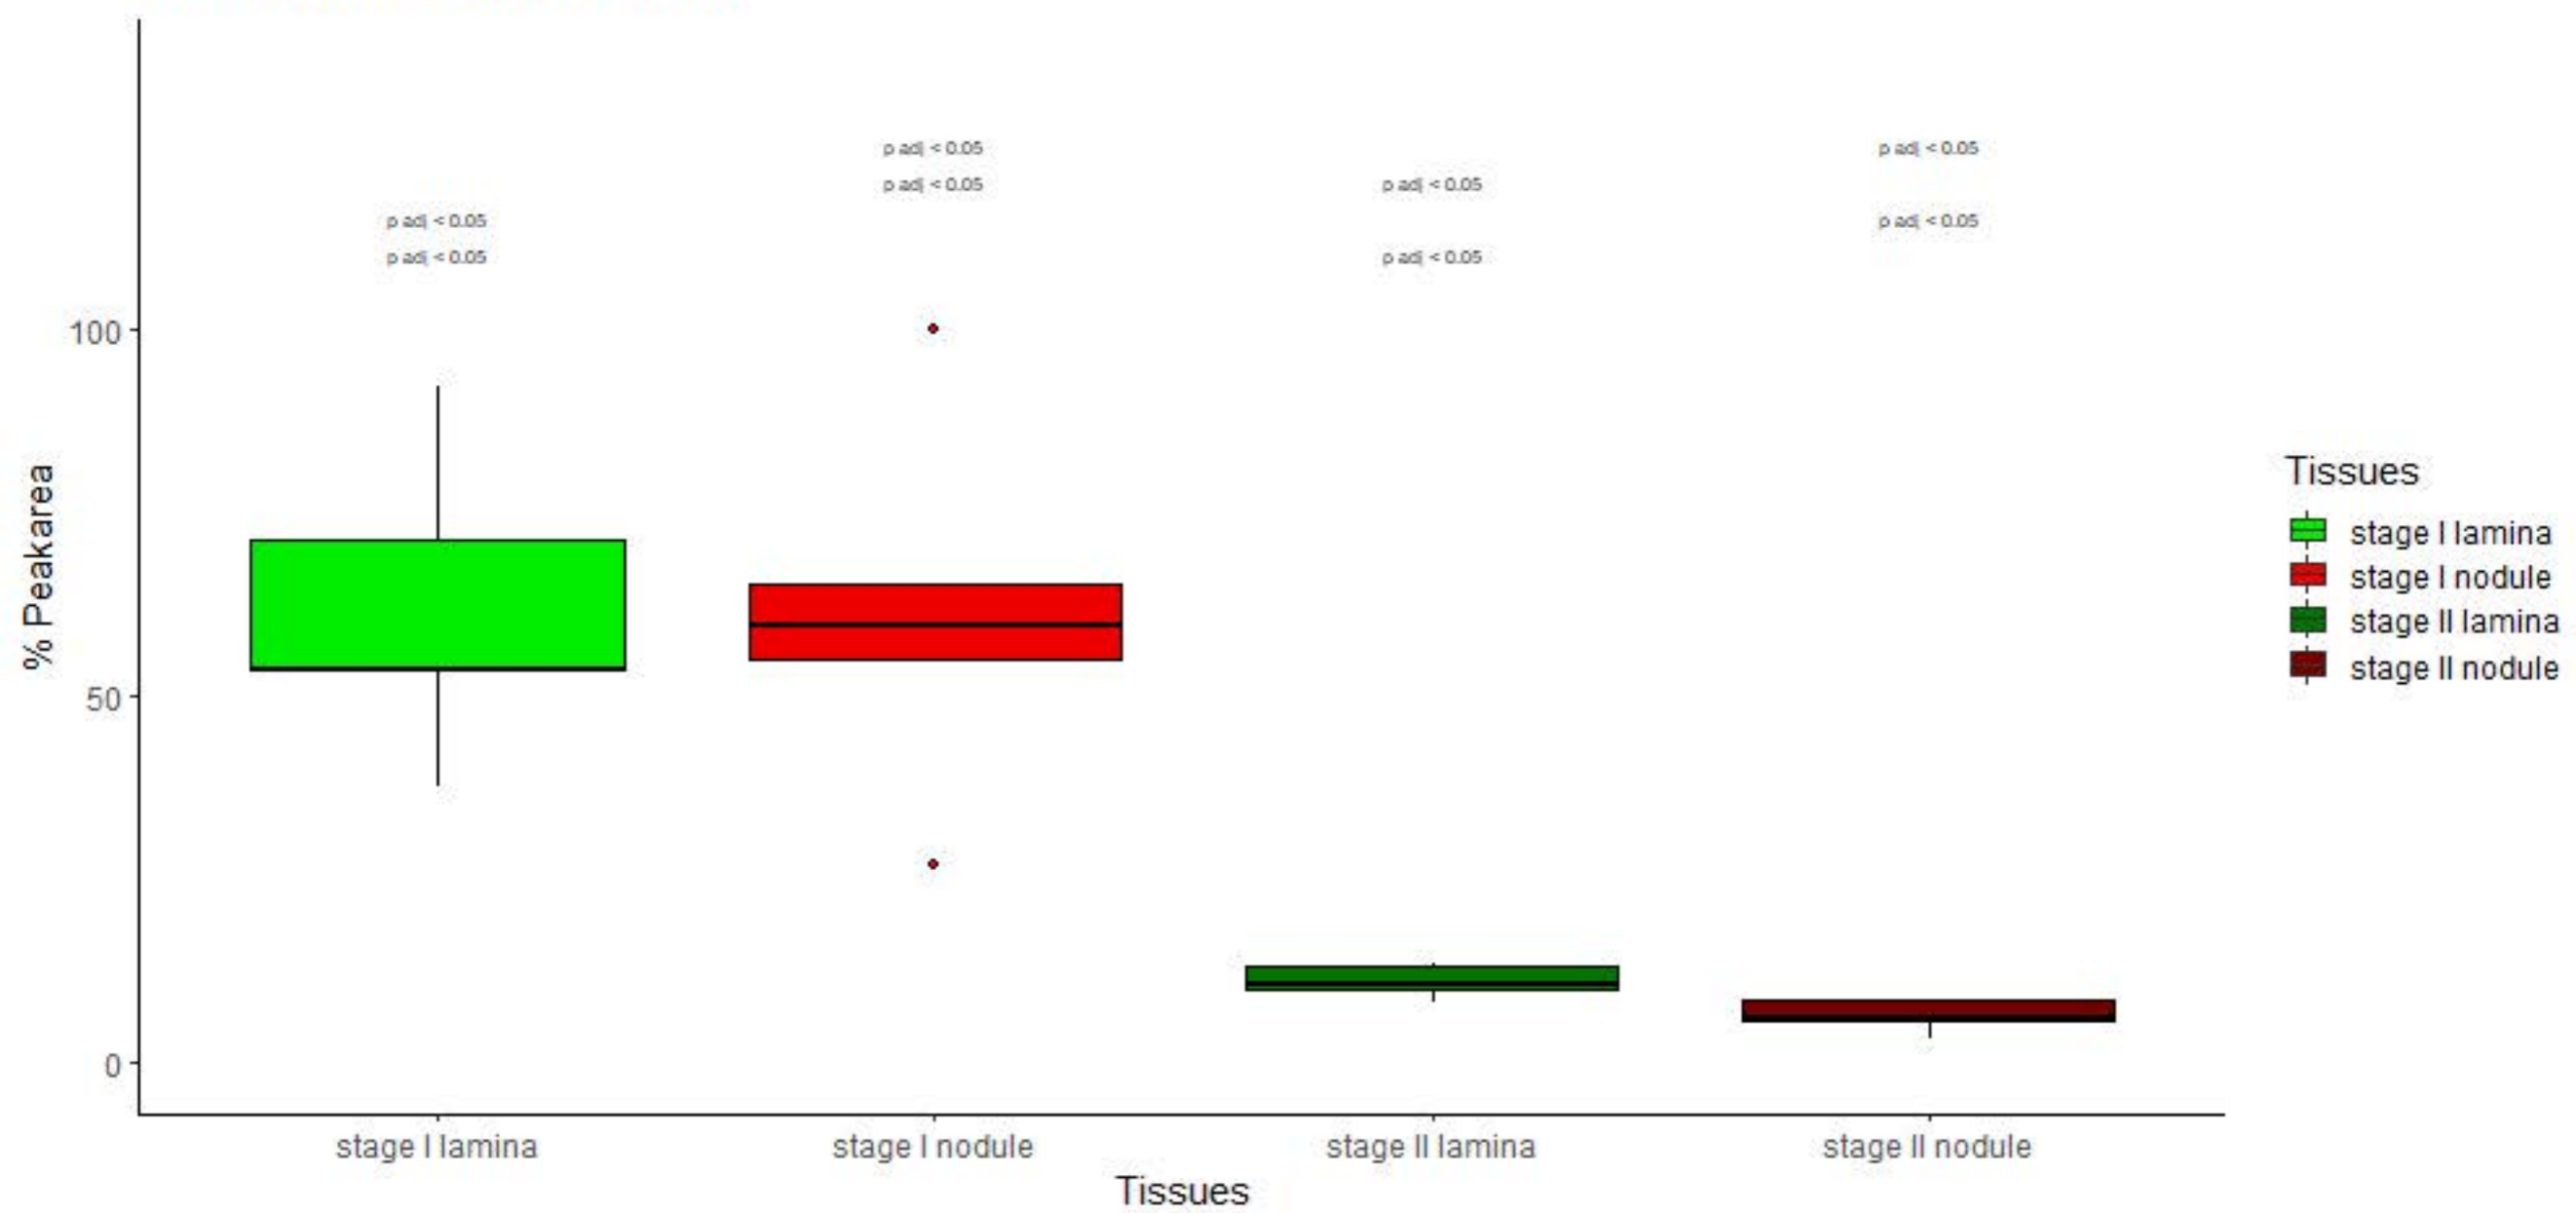

# Raffinose

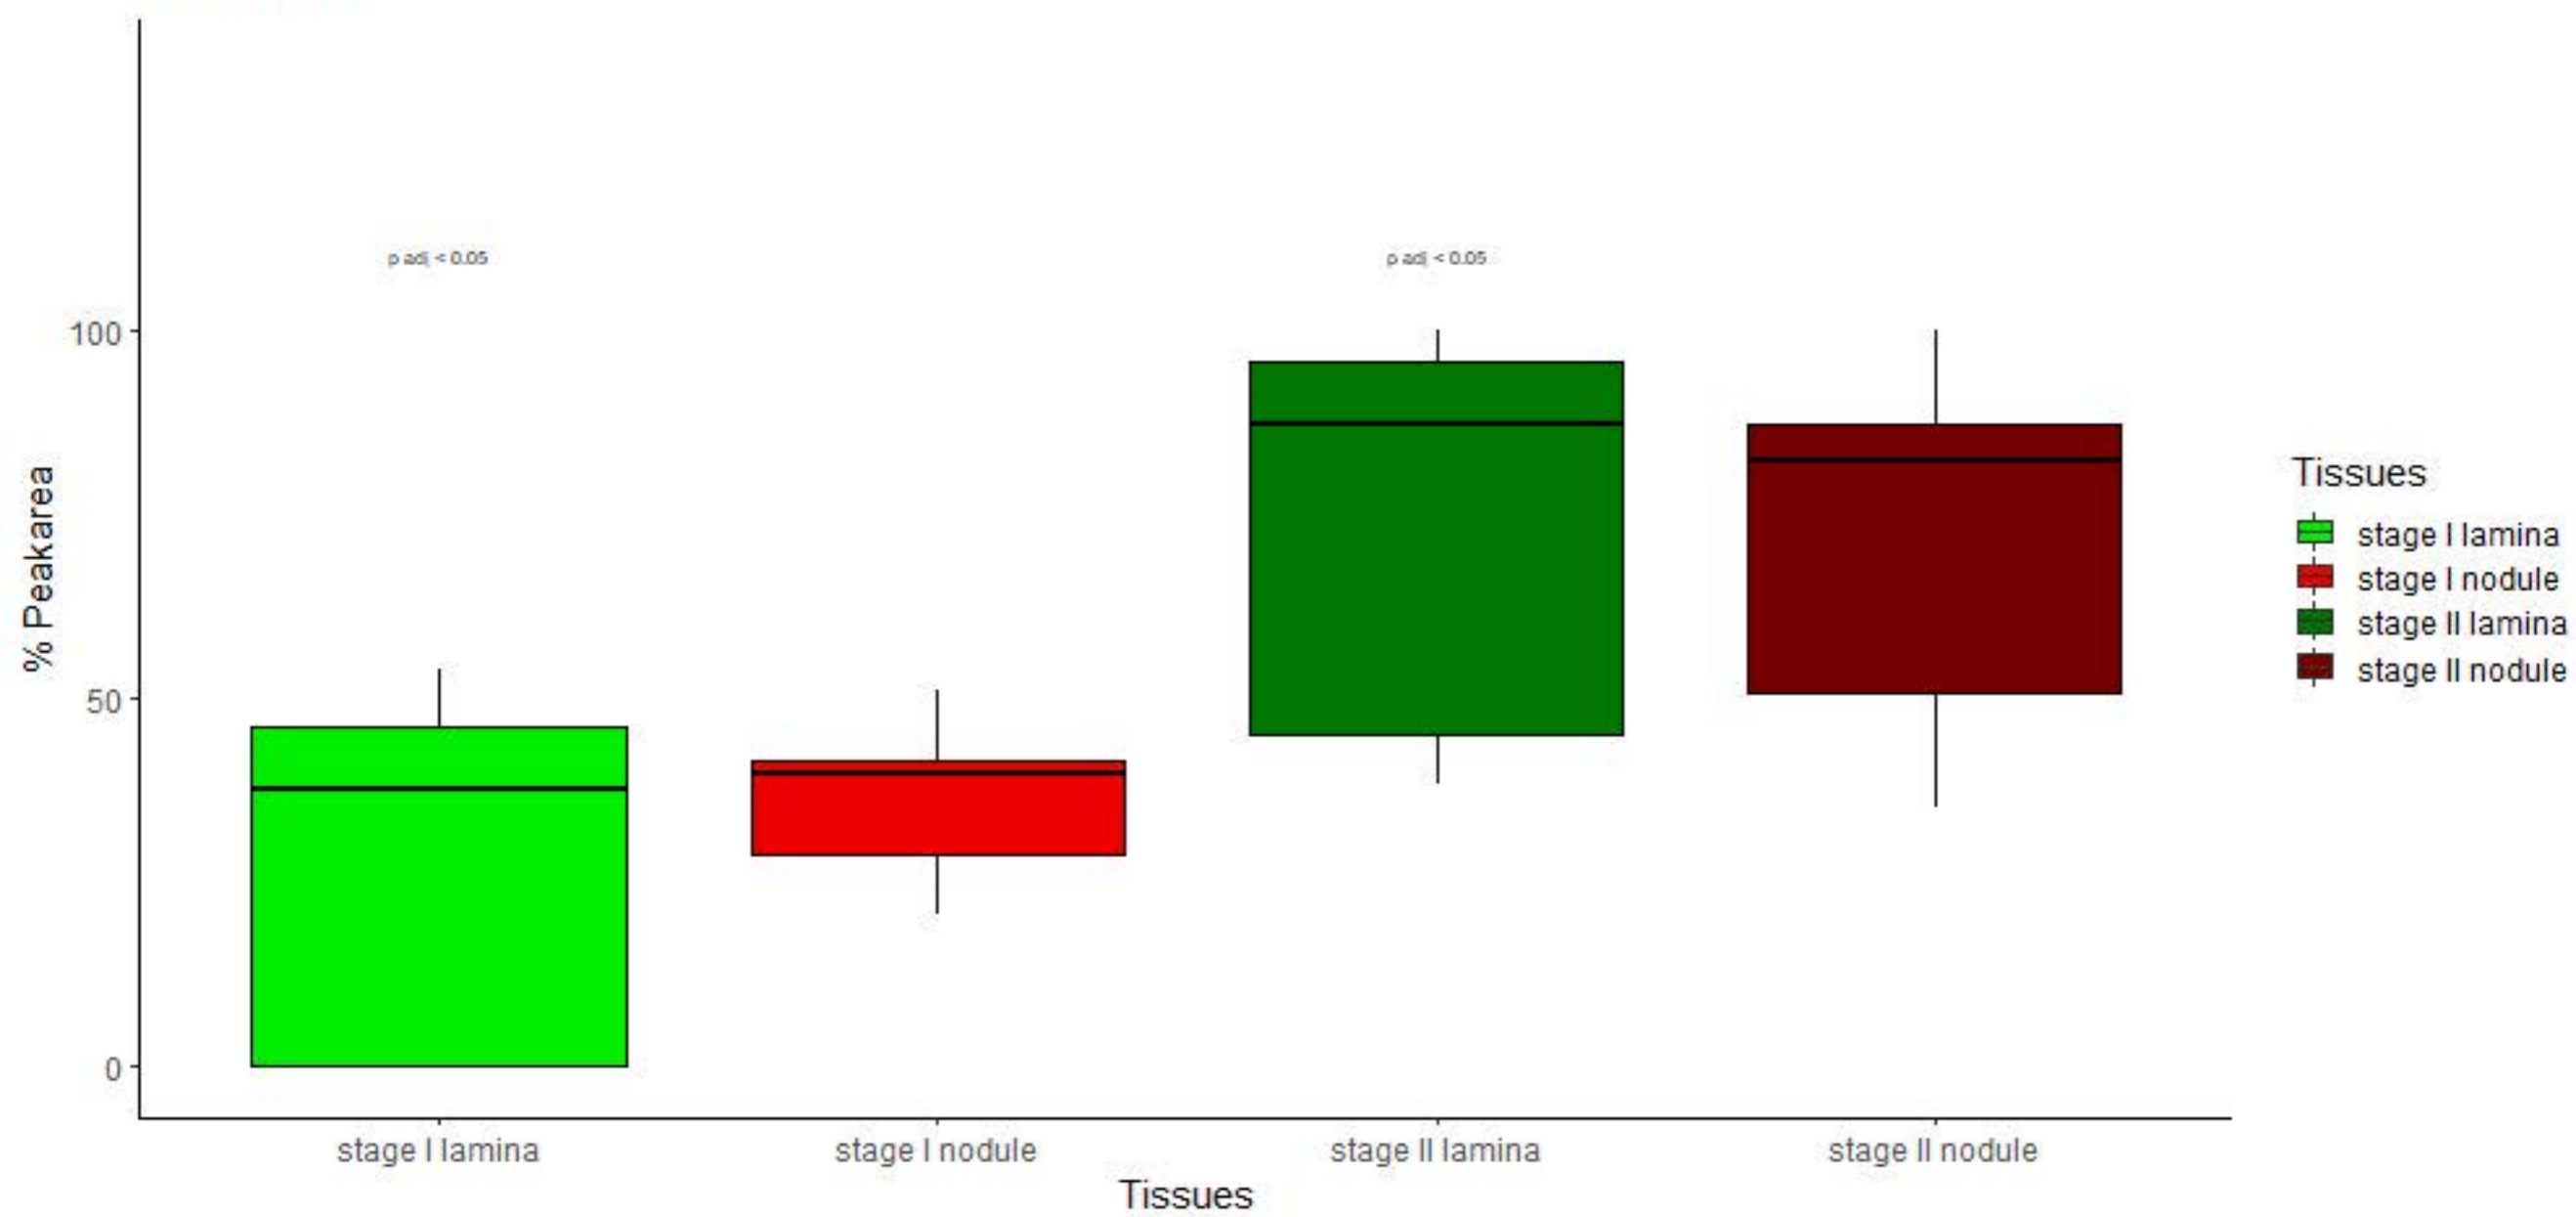

# Glycerol

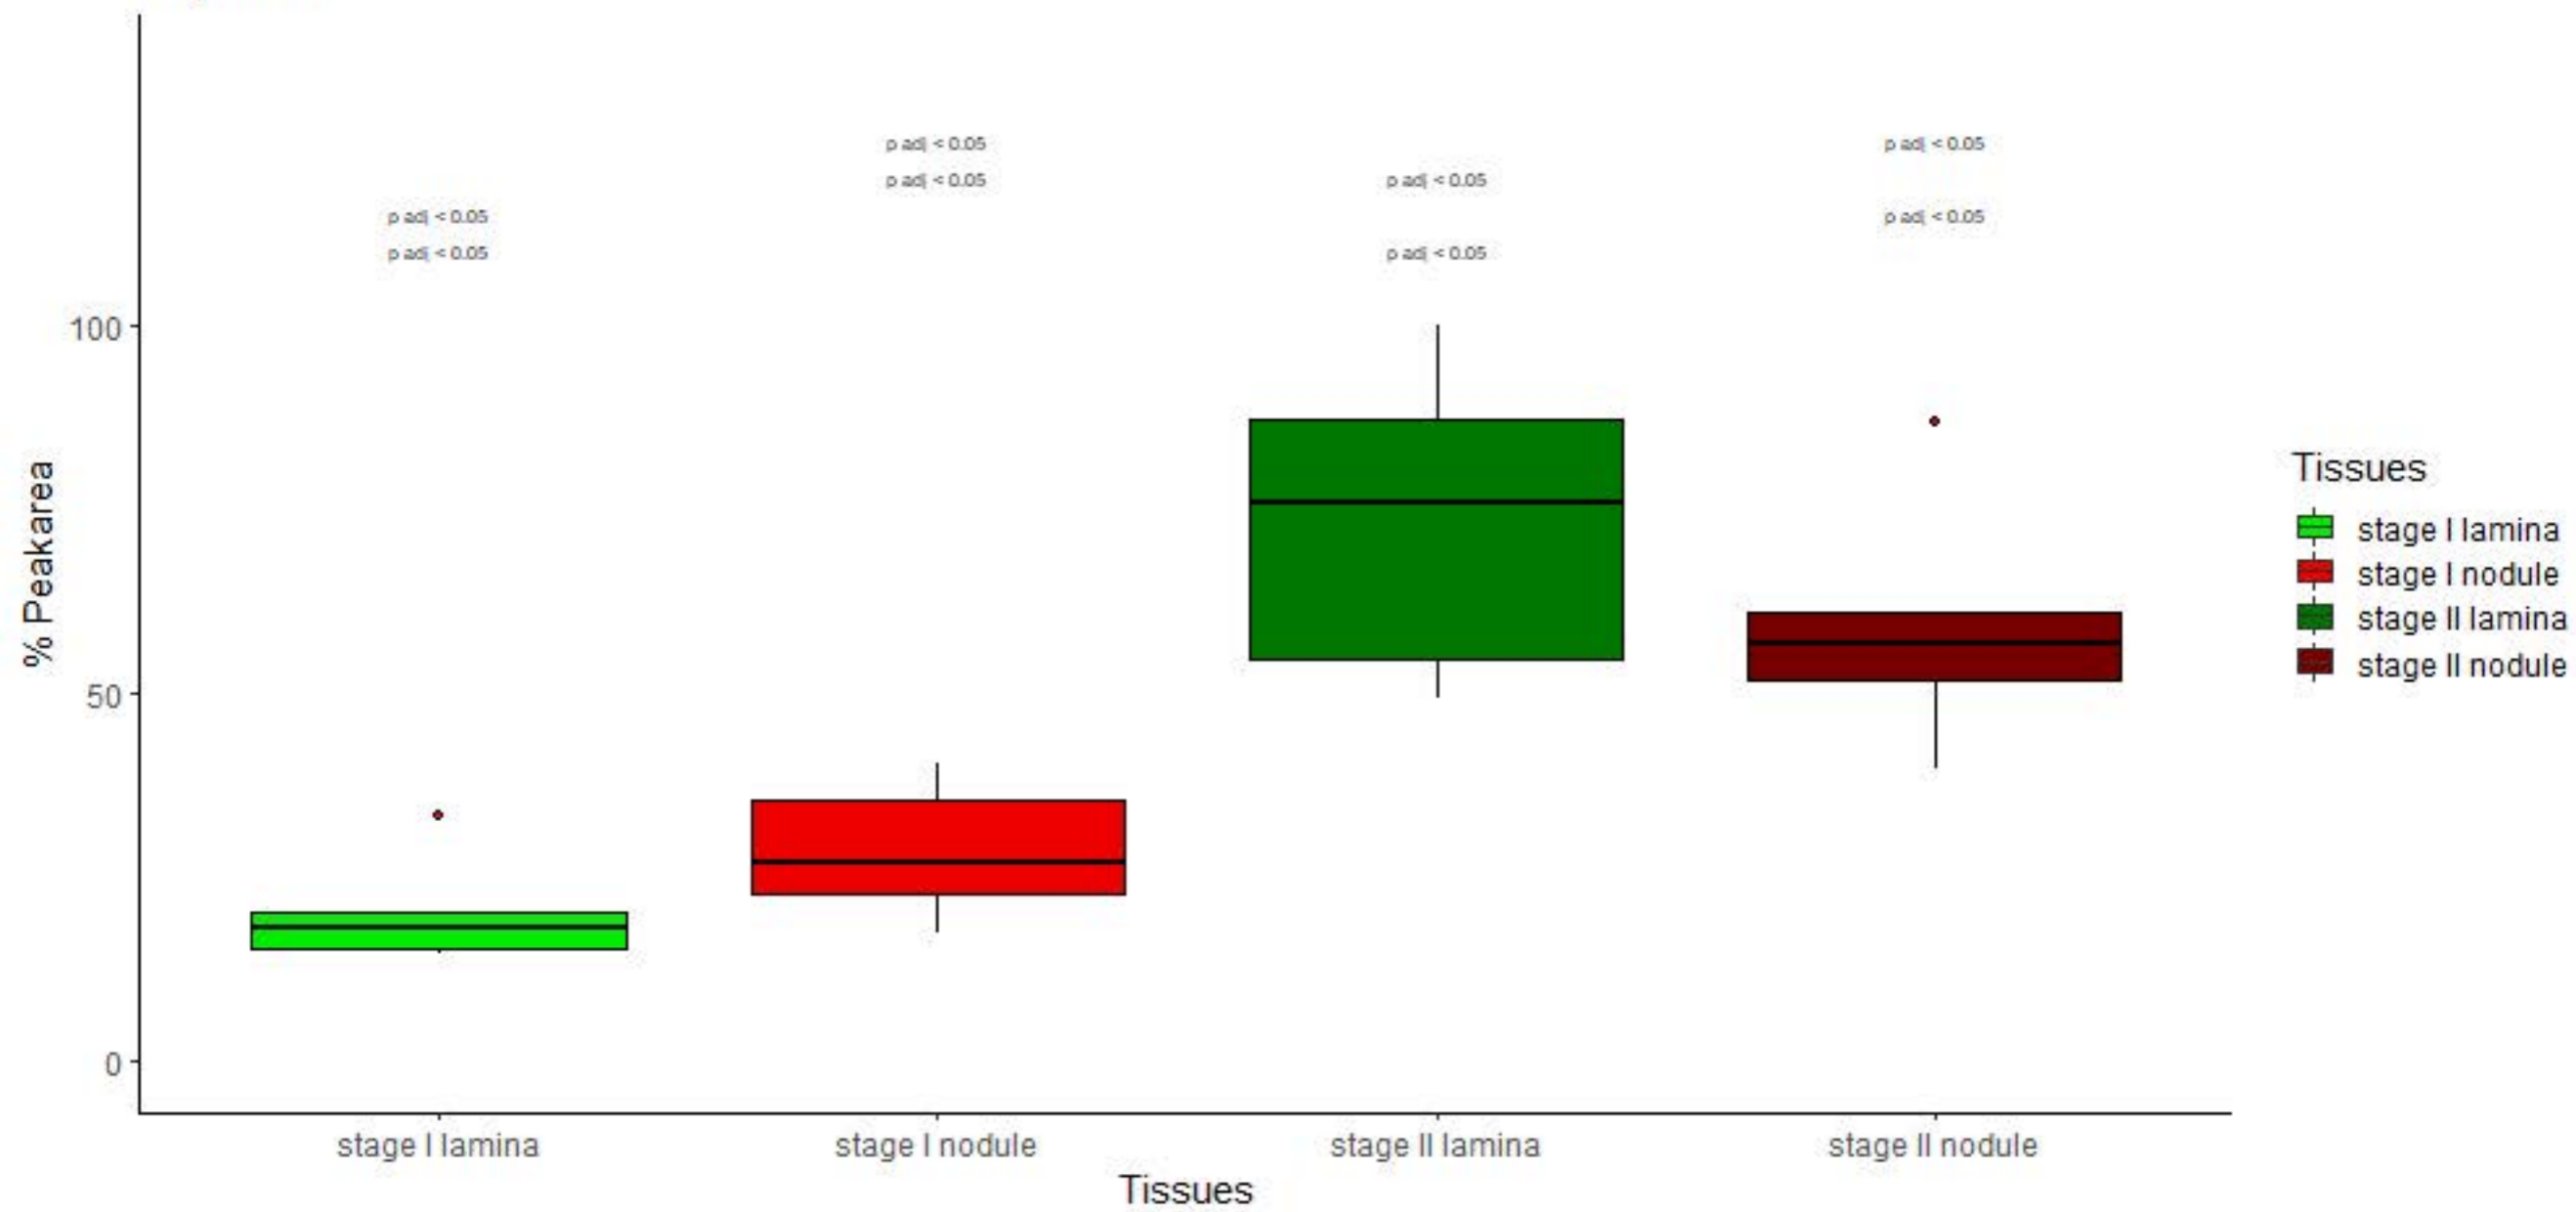



# Threitol

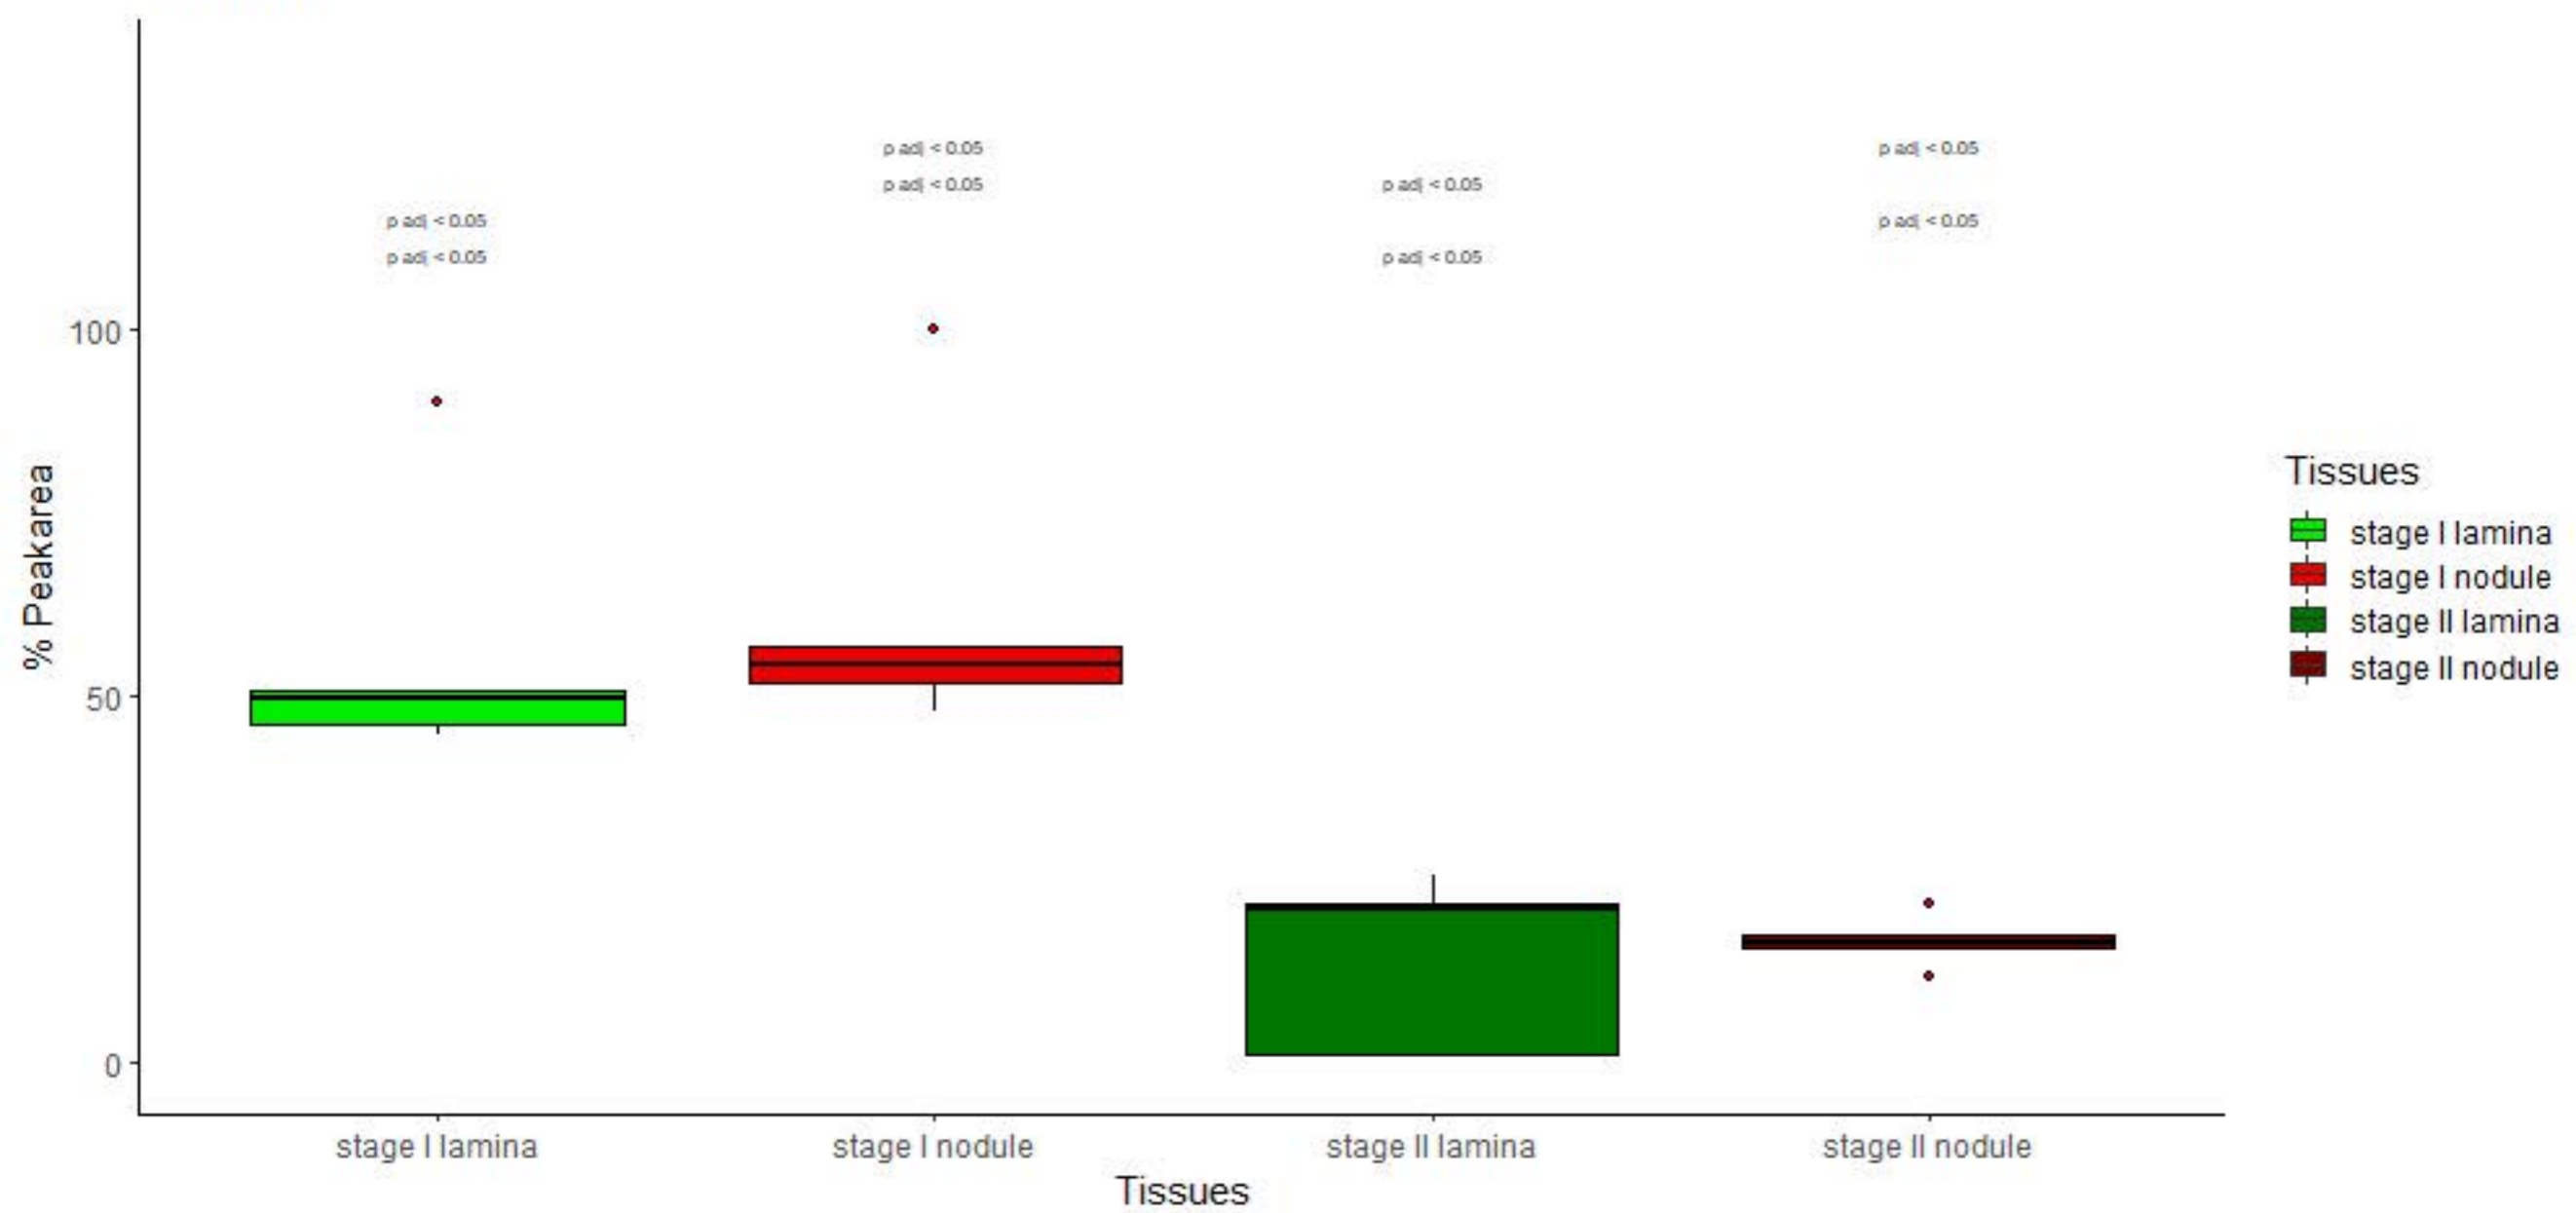

# Glycerol-3-phosphate

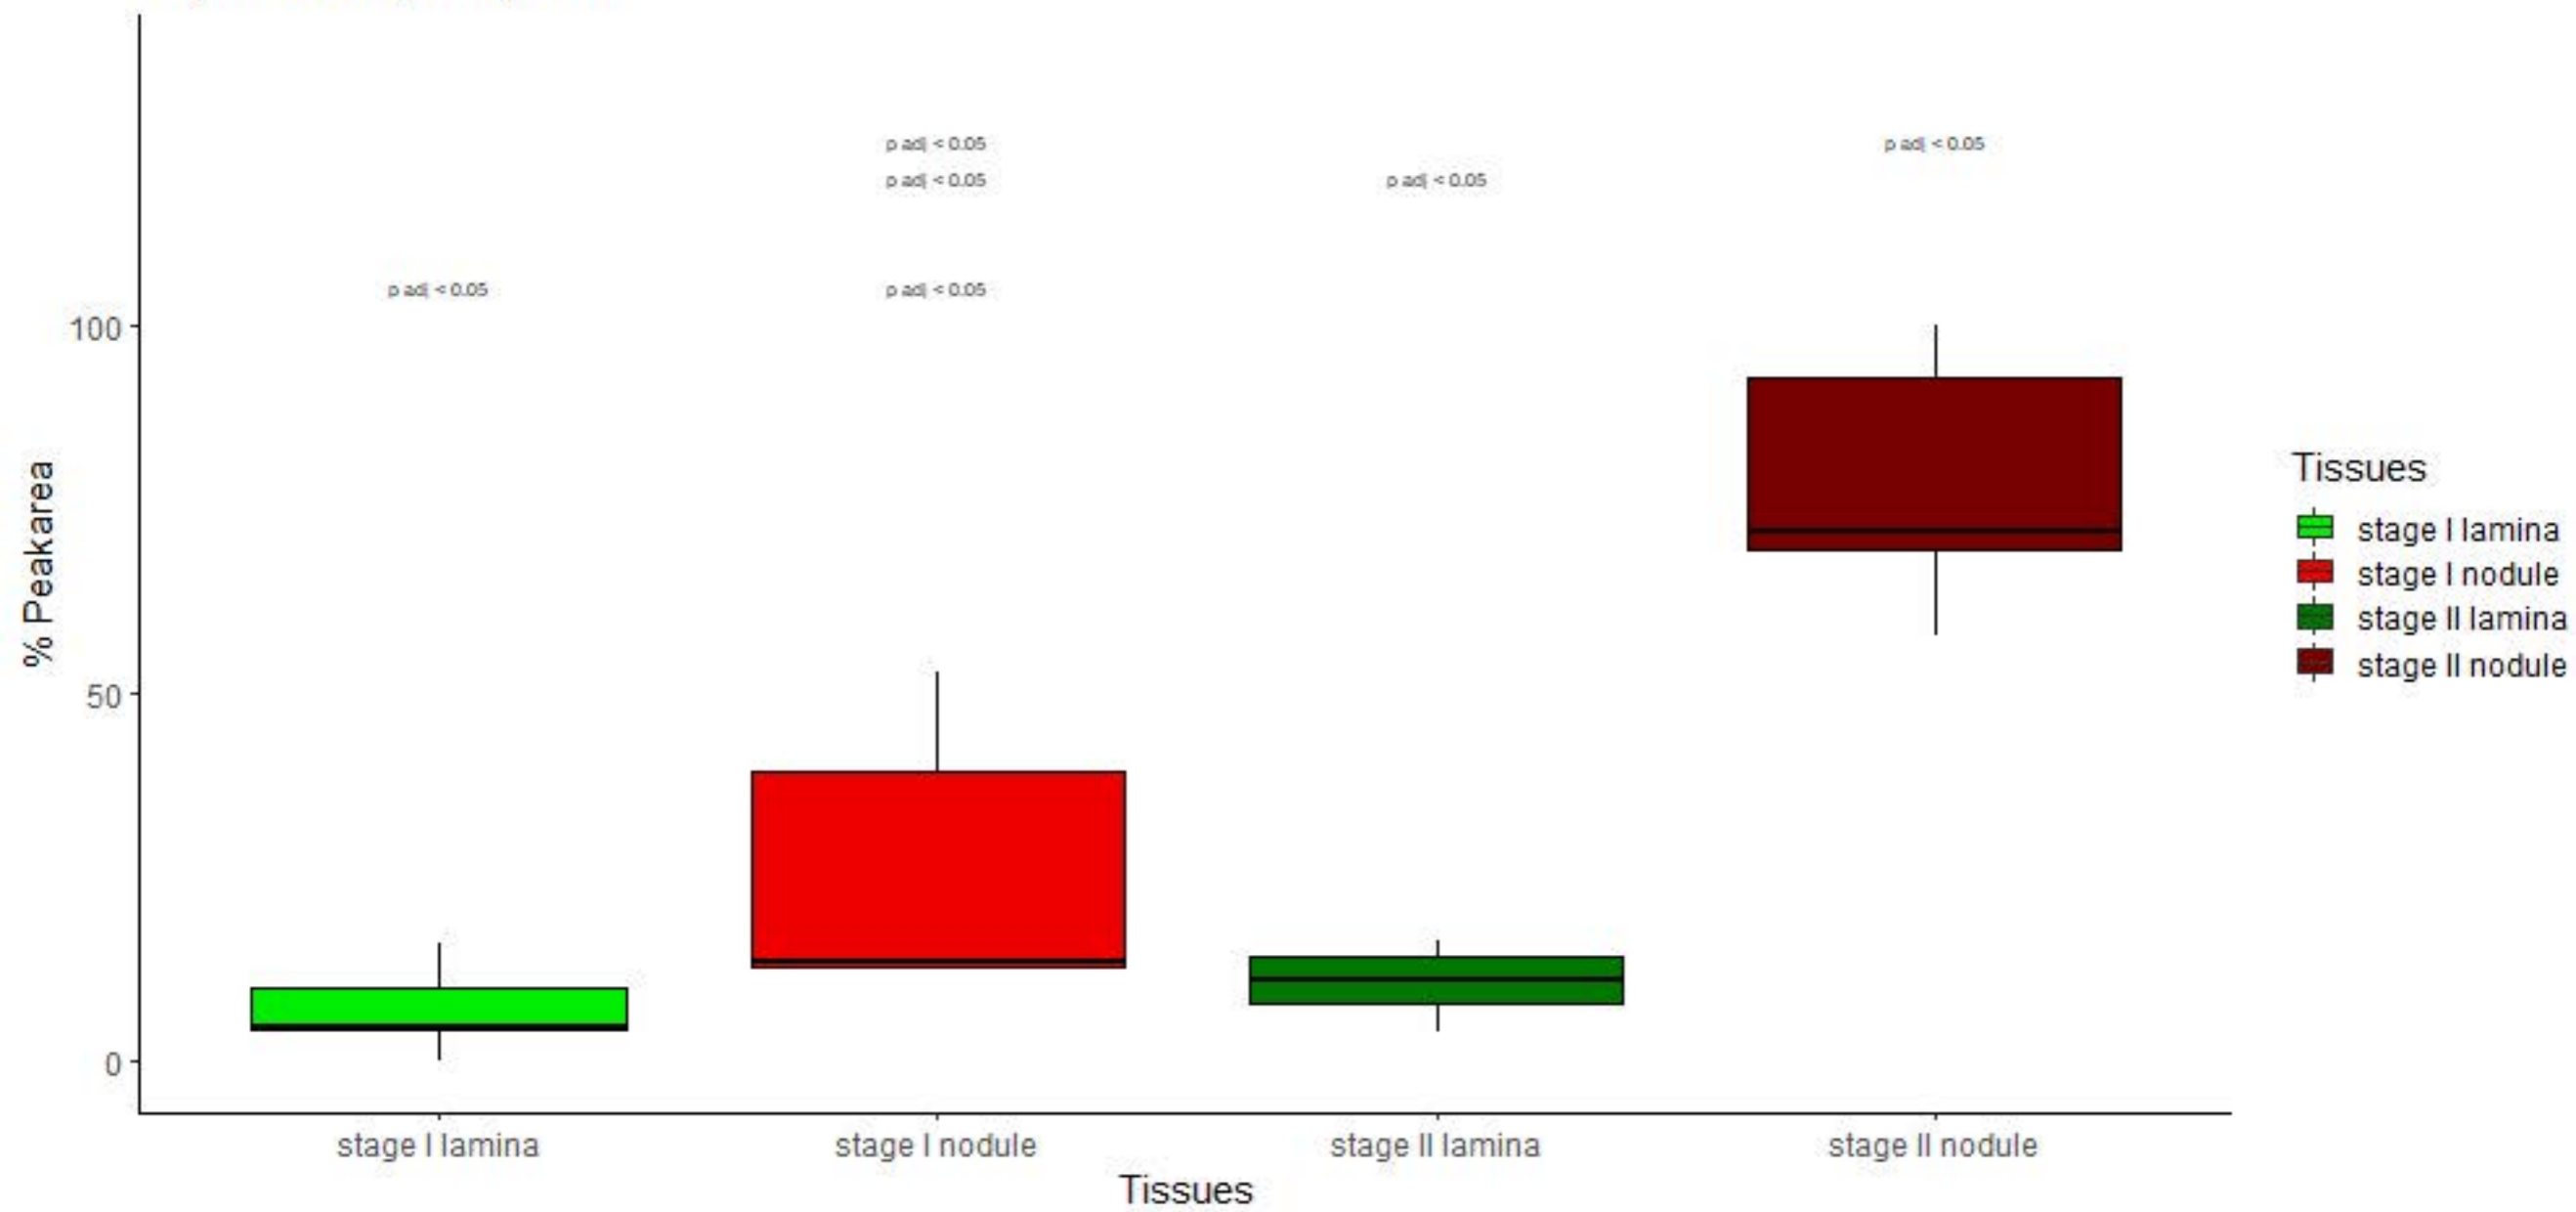

# Inositol-2-phosphate, myo-

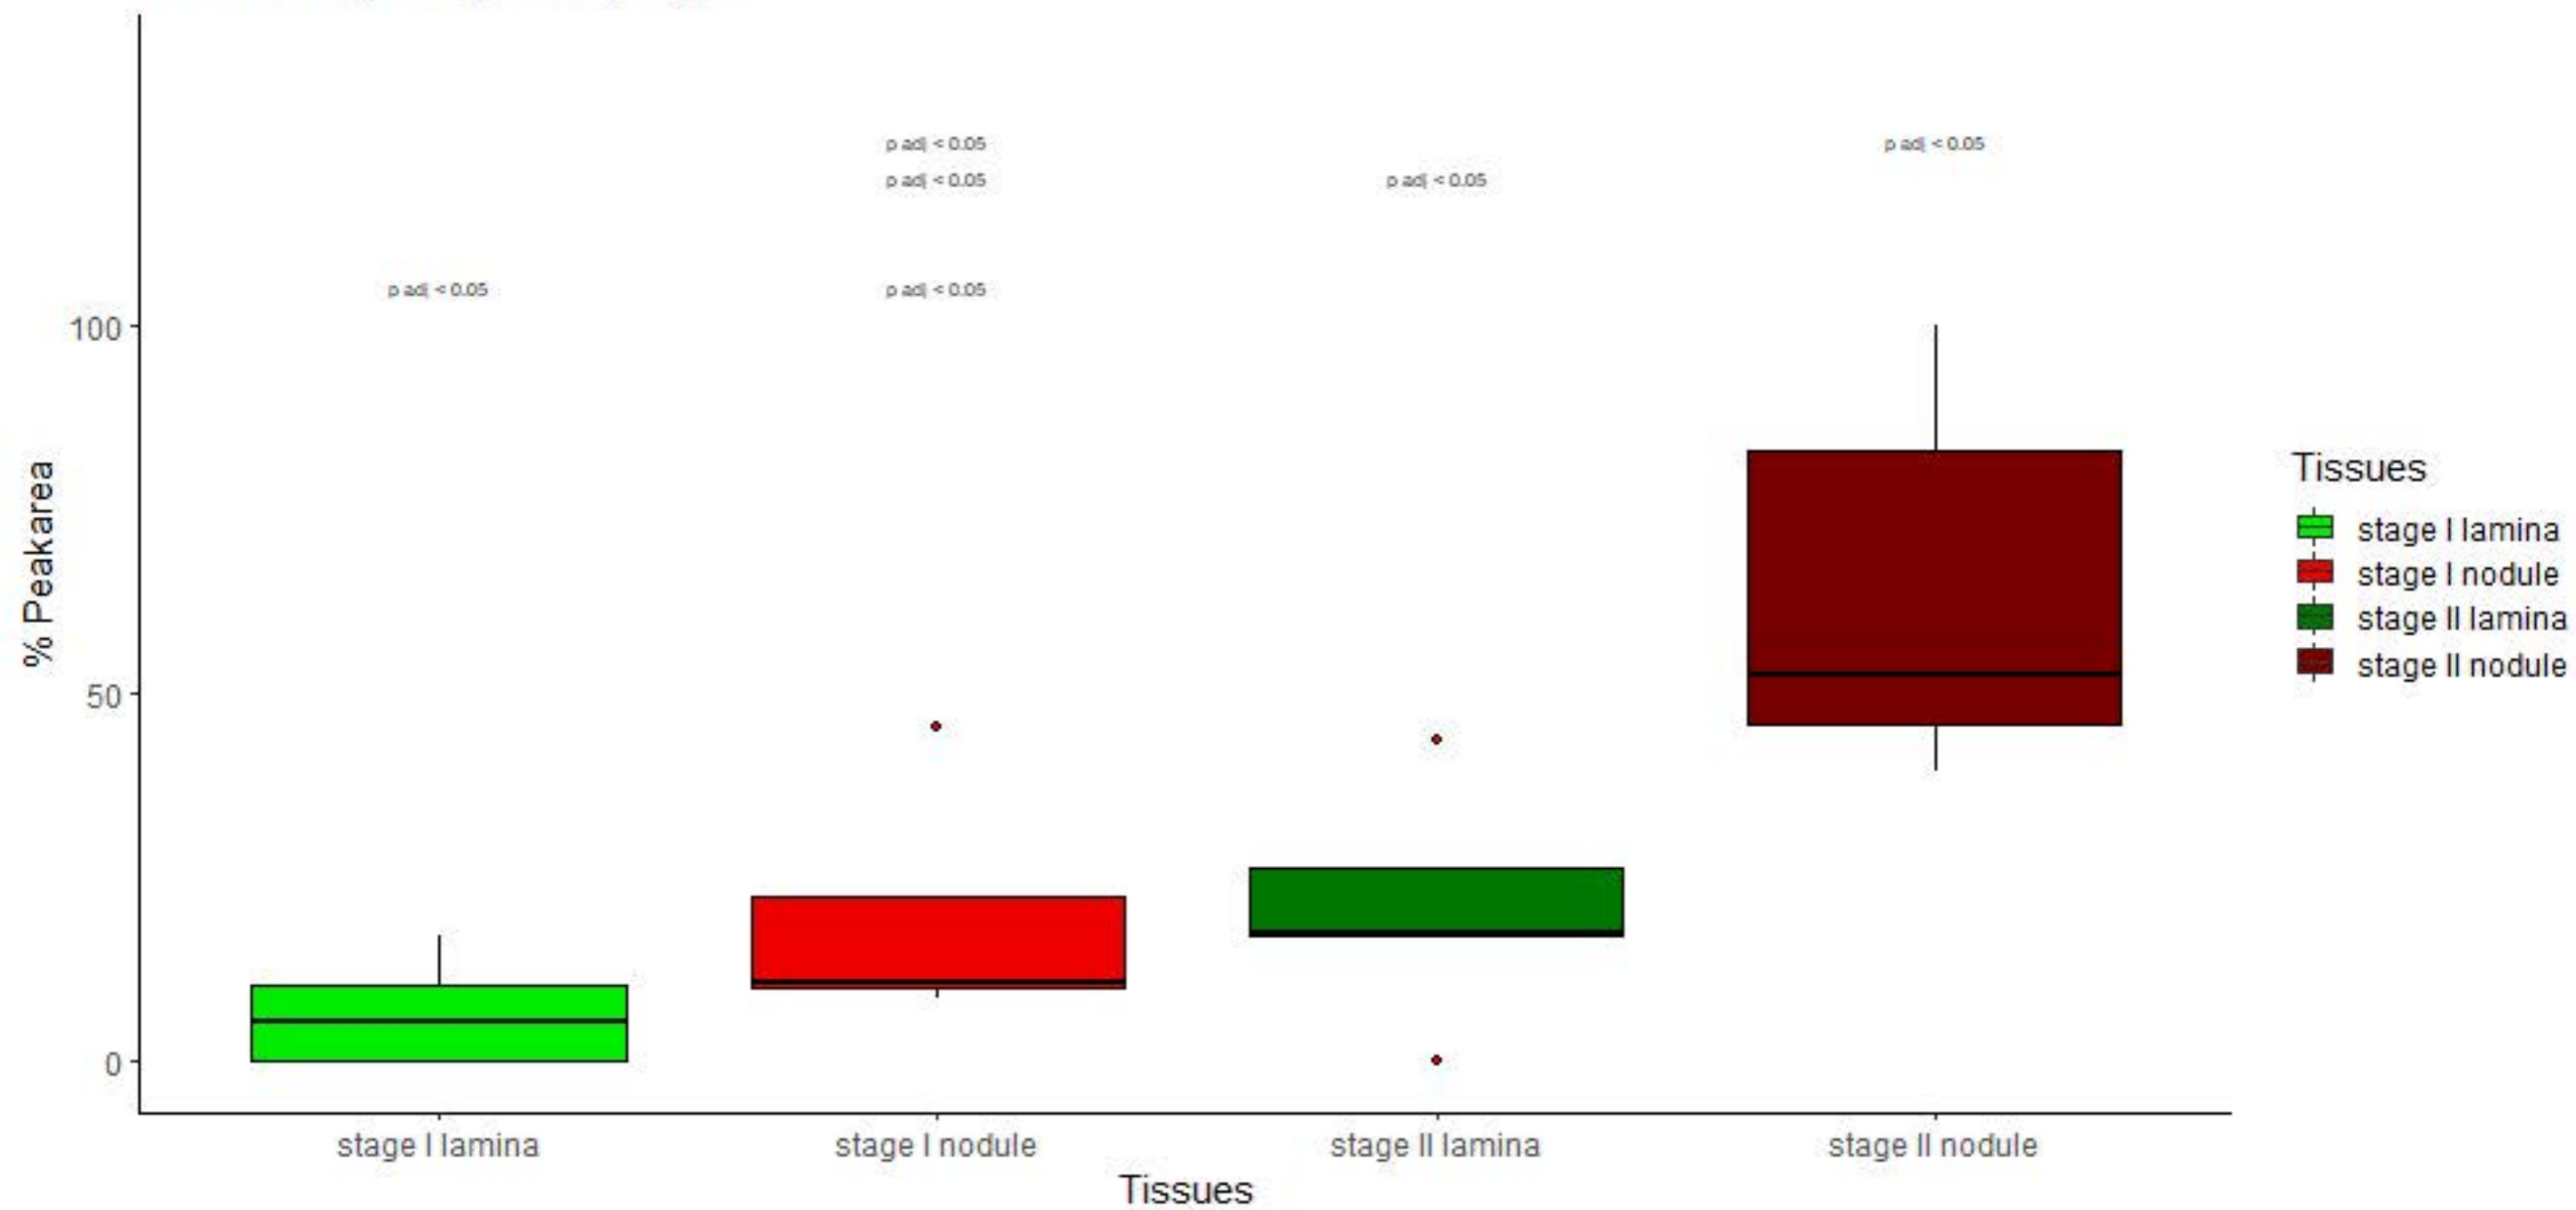

# Serine

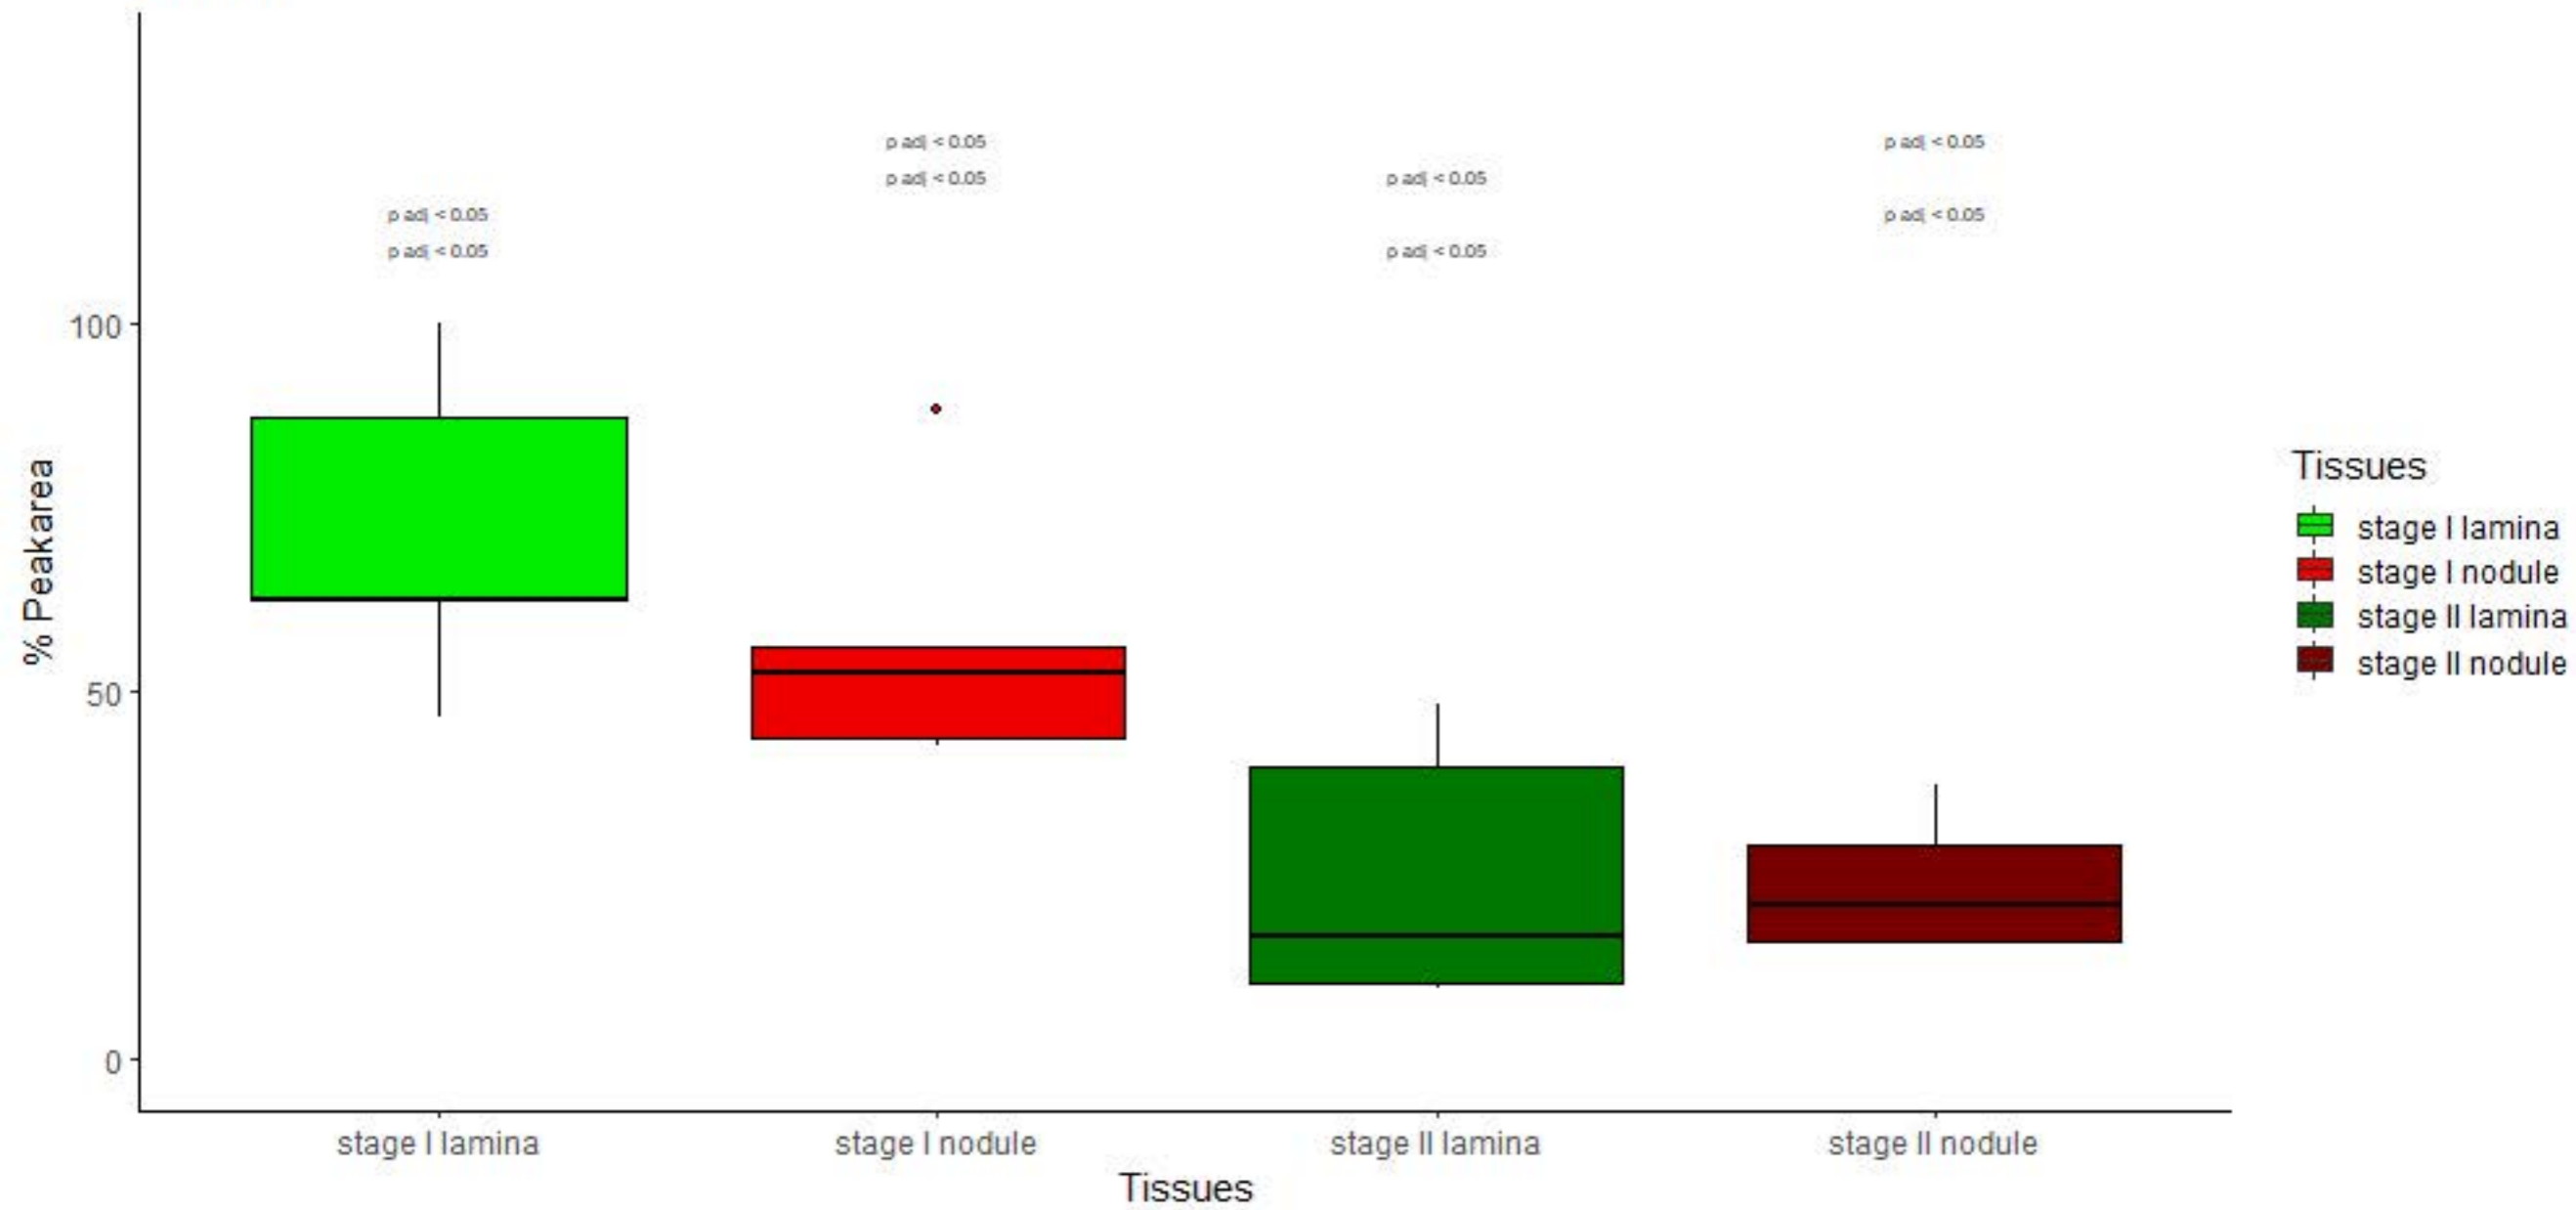

# Threonine

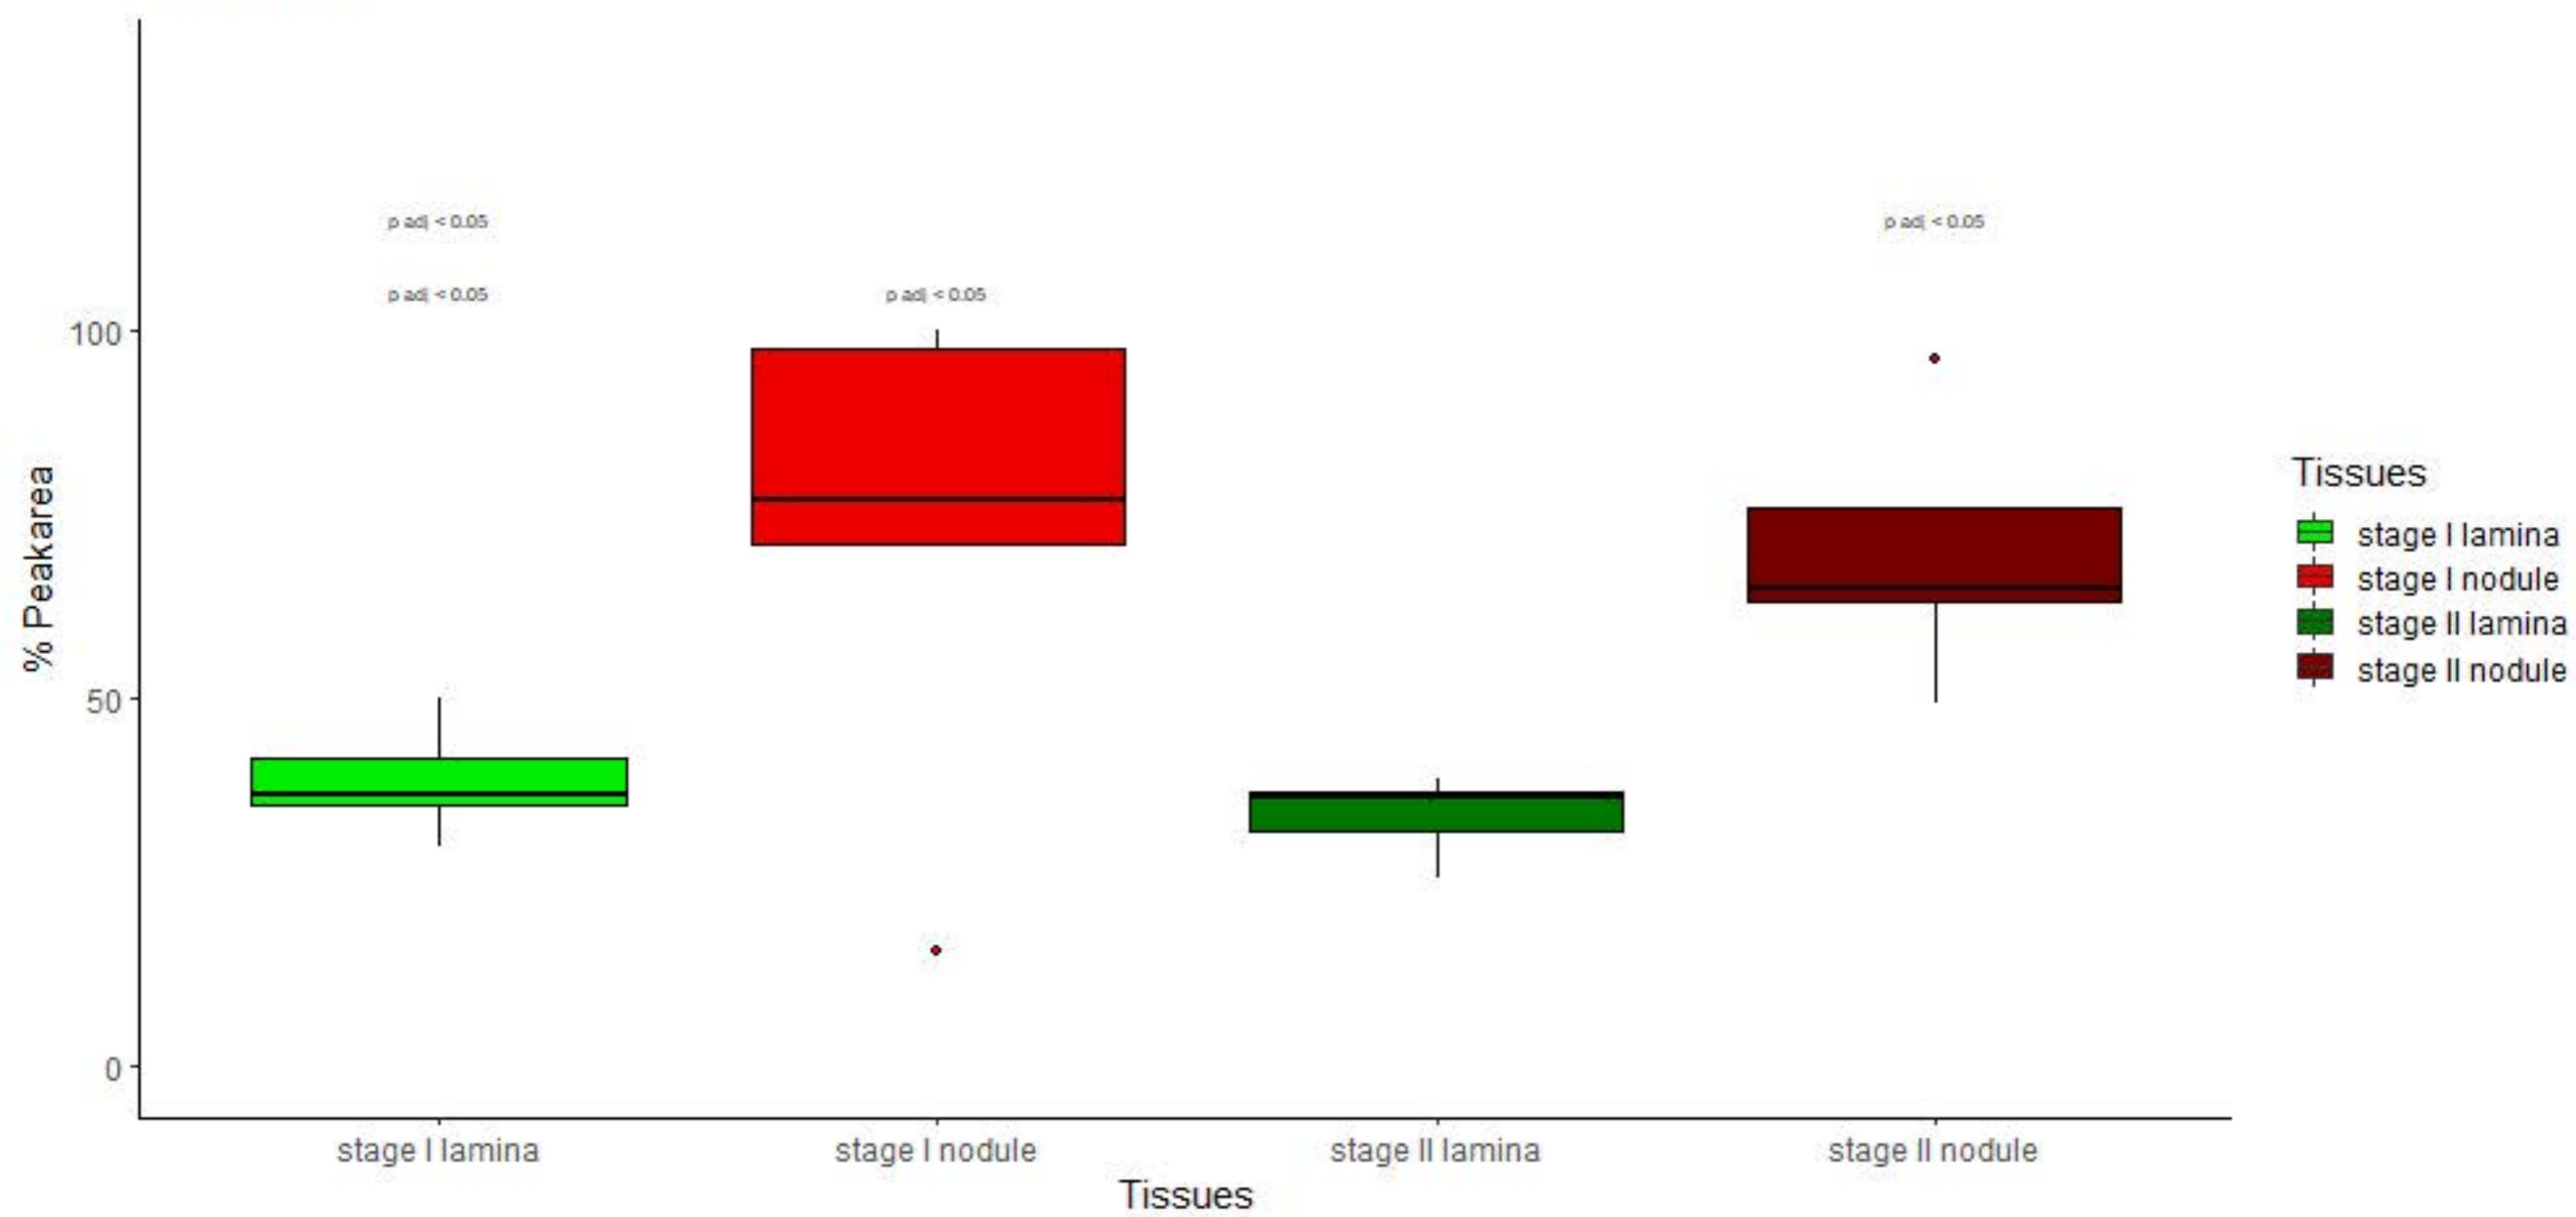

# Valine

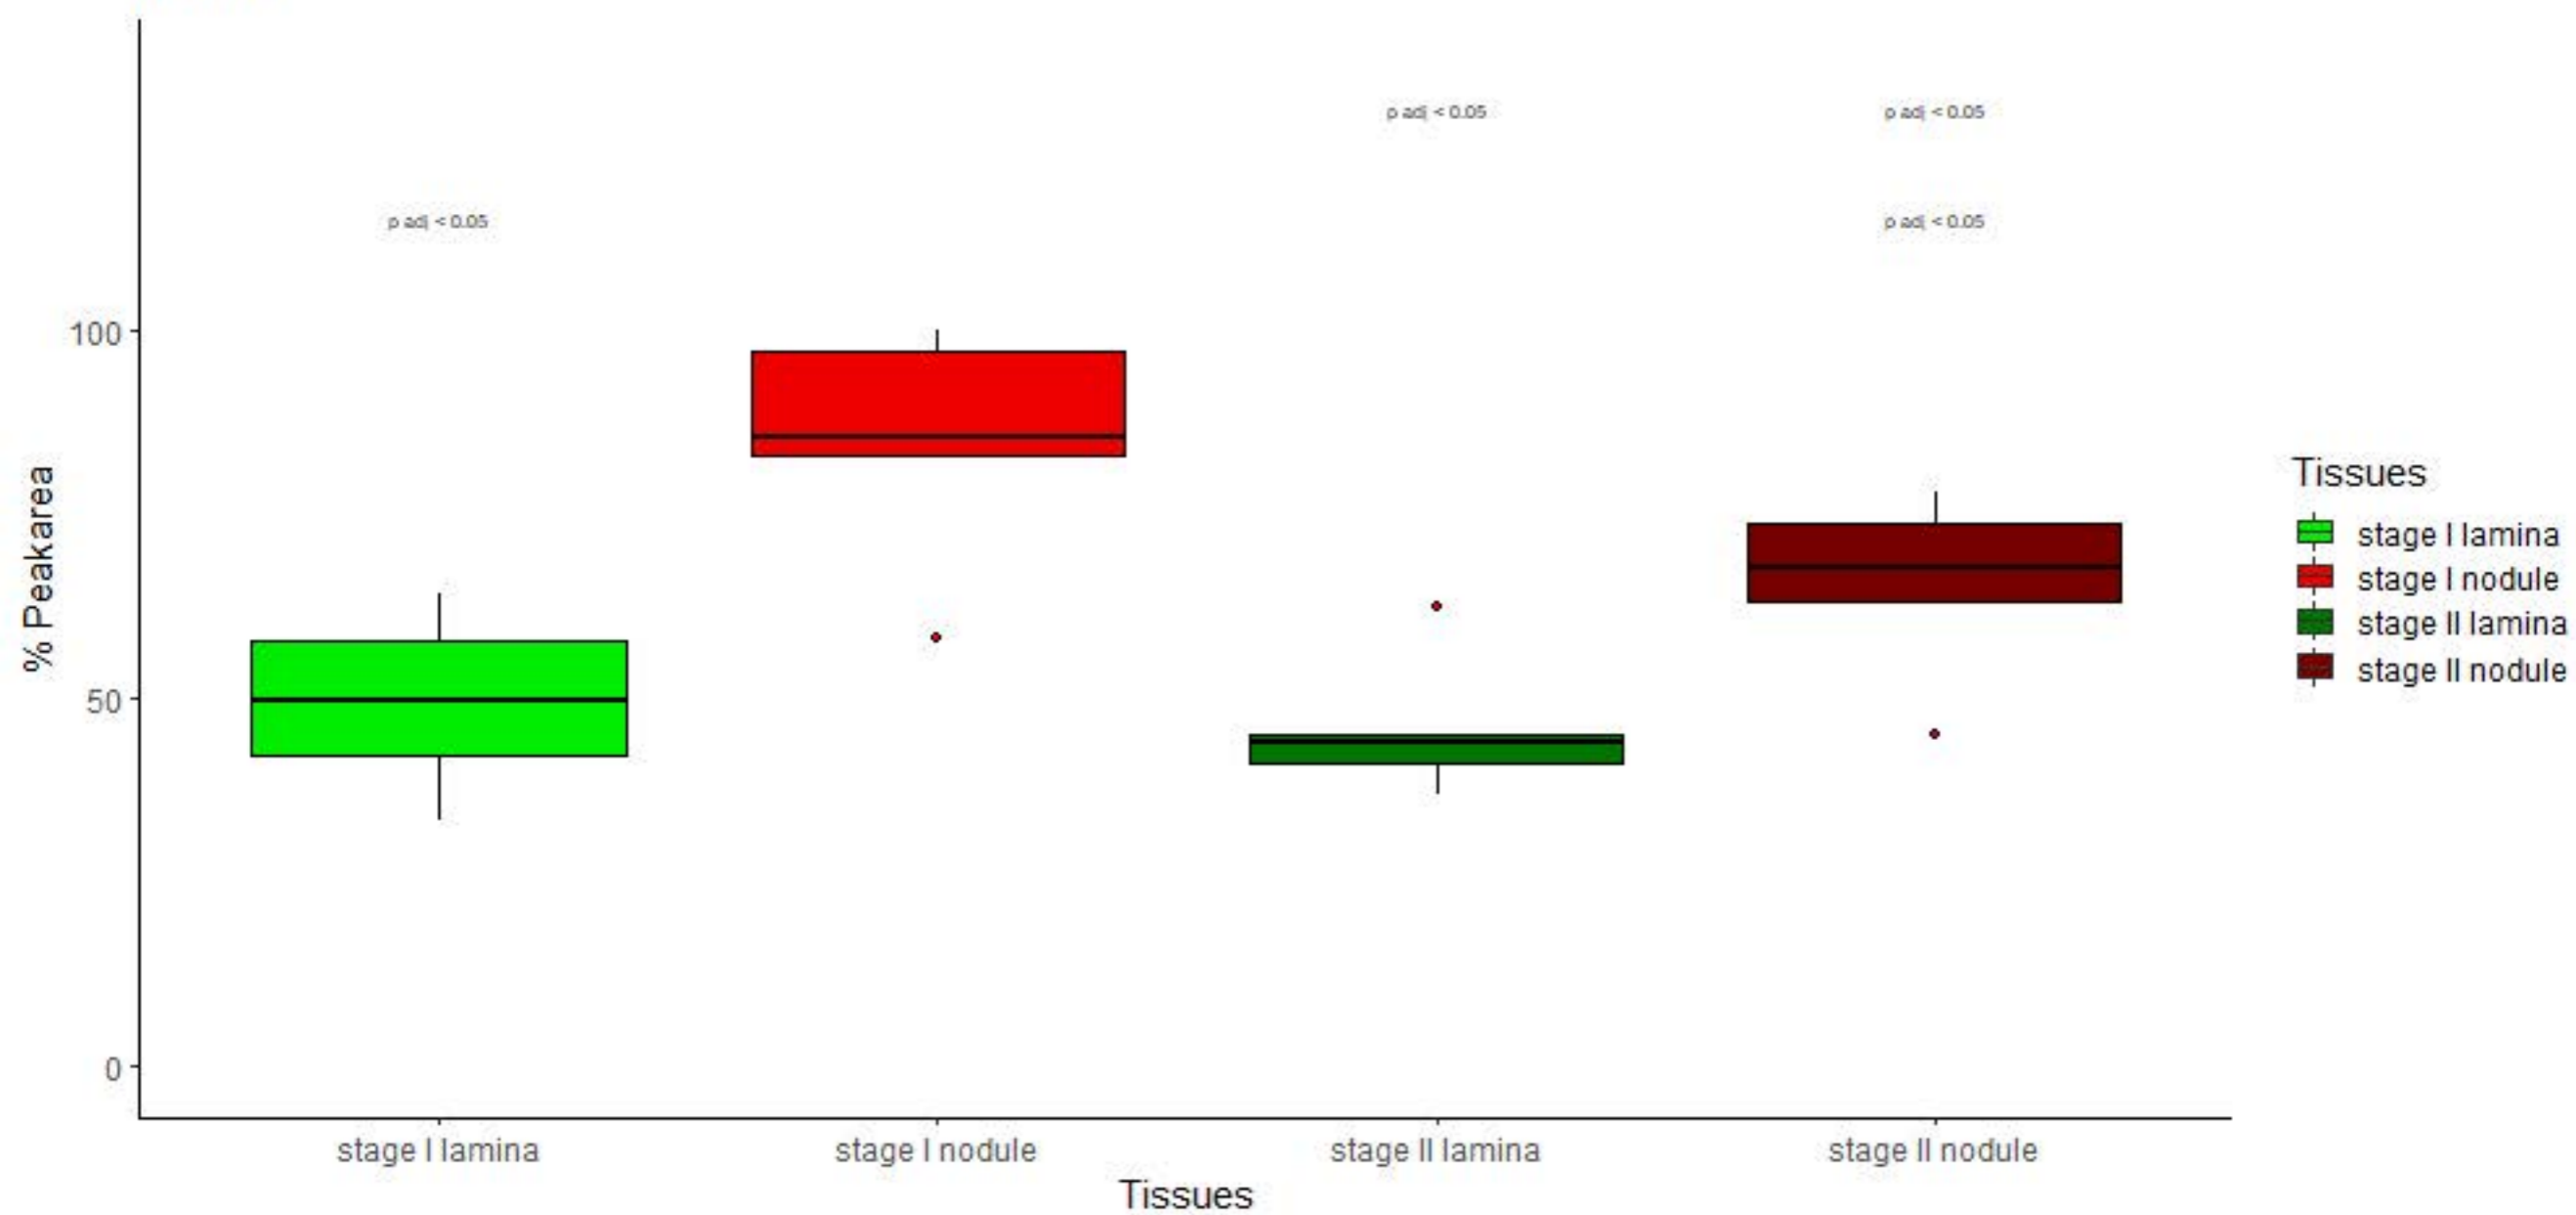

# Isoleucine

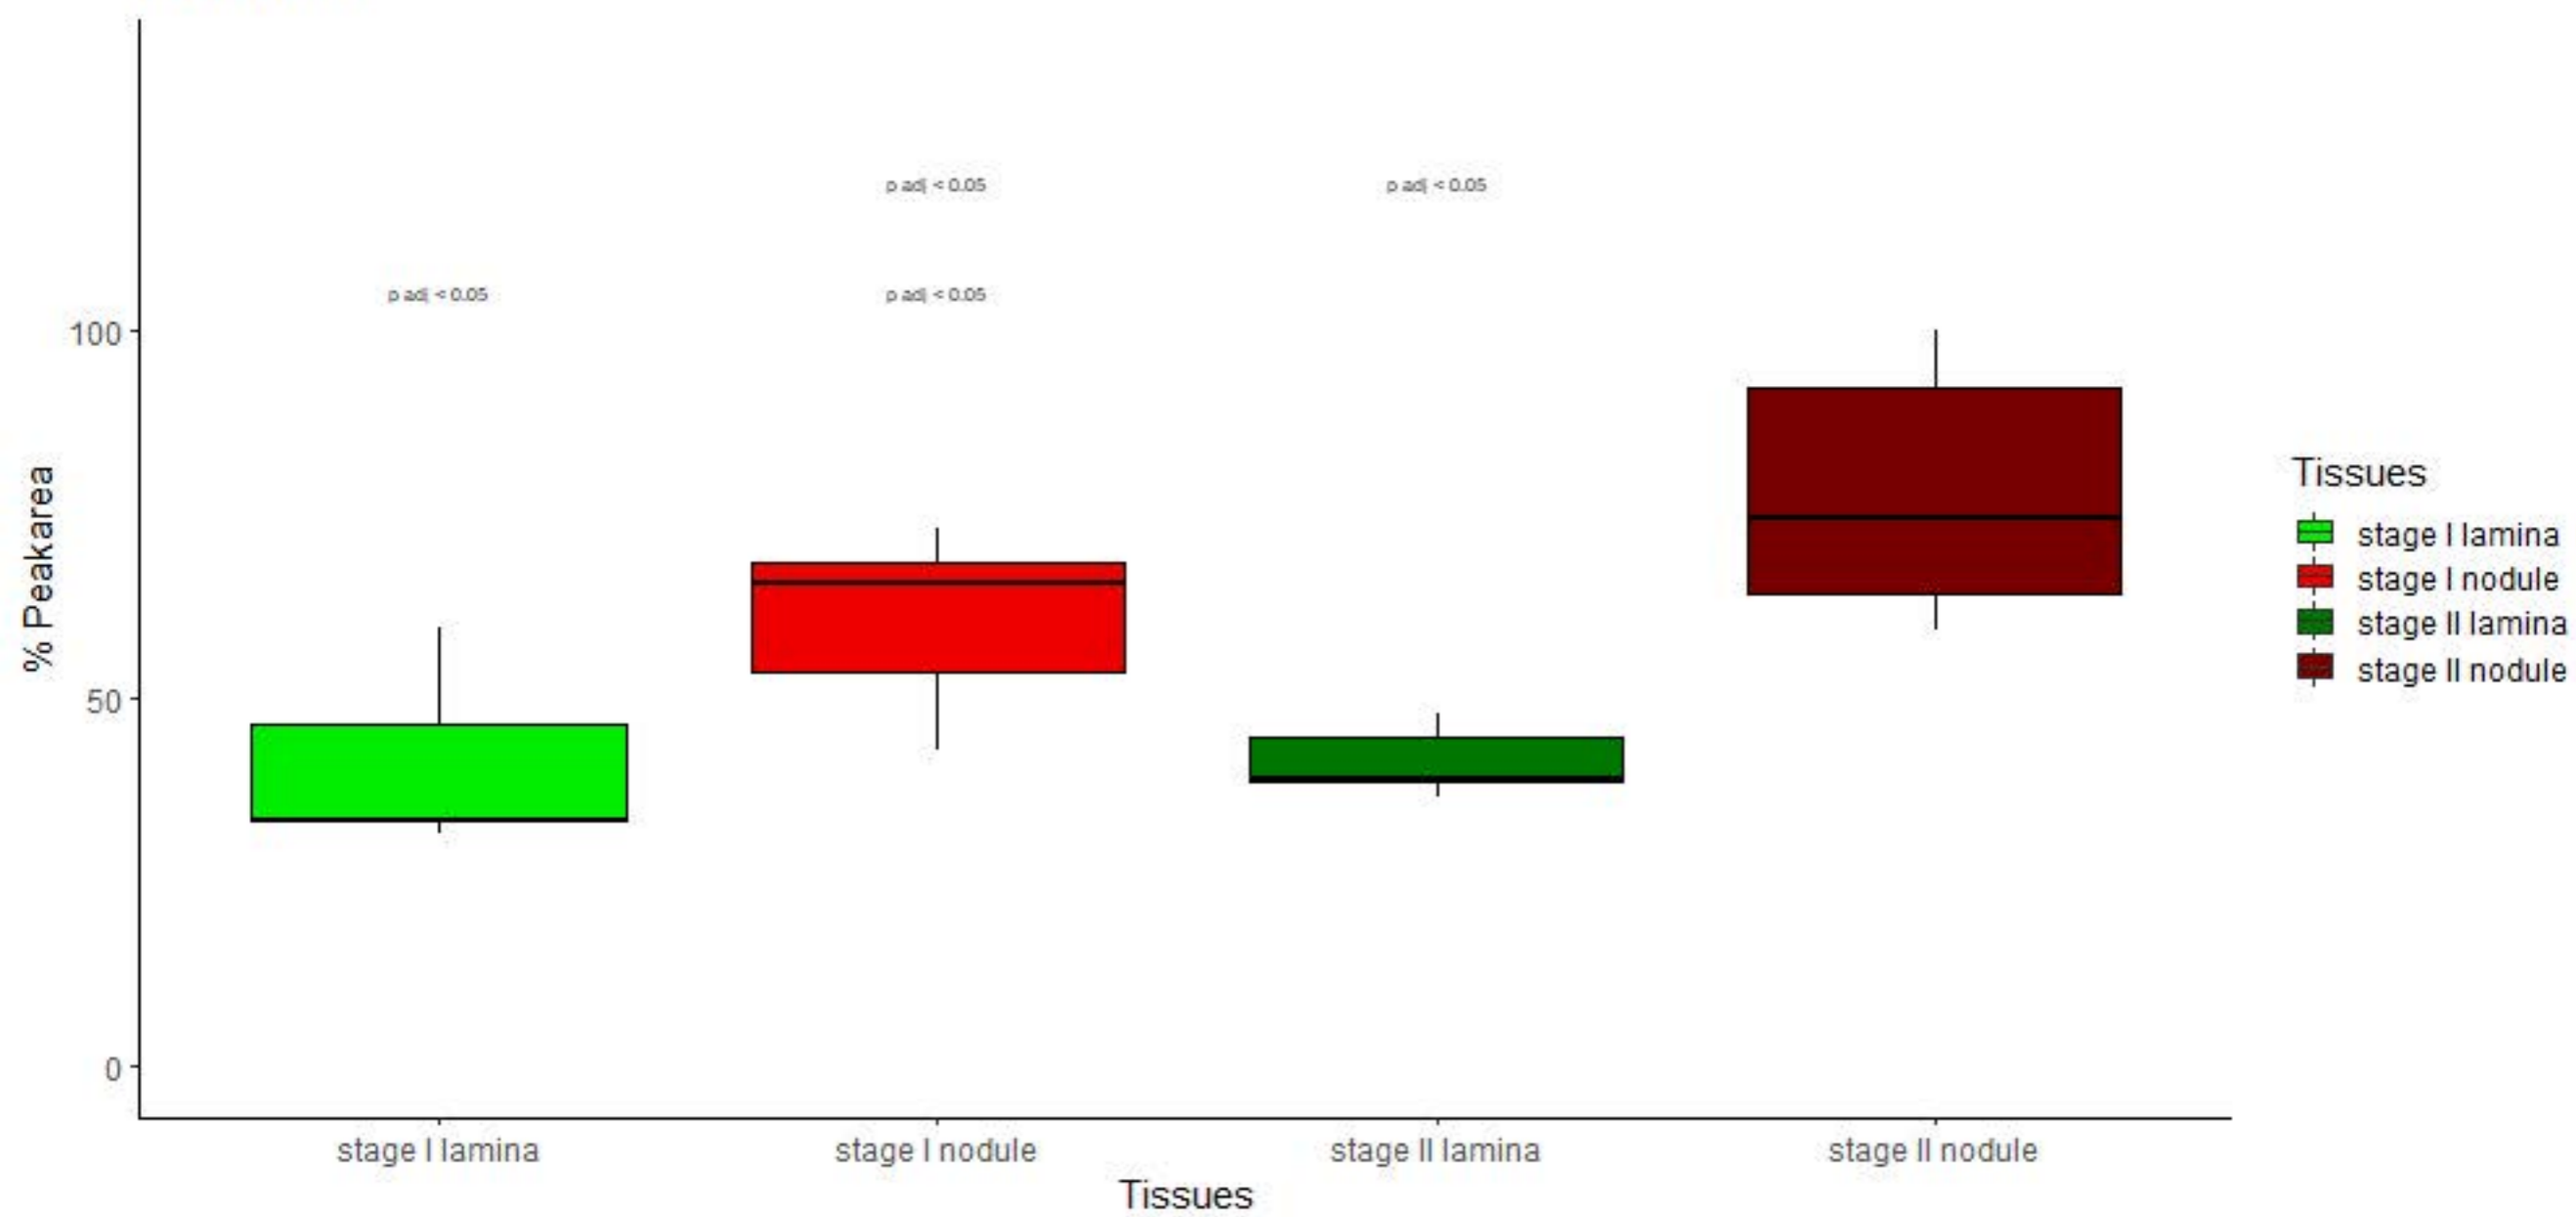

# Leucine

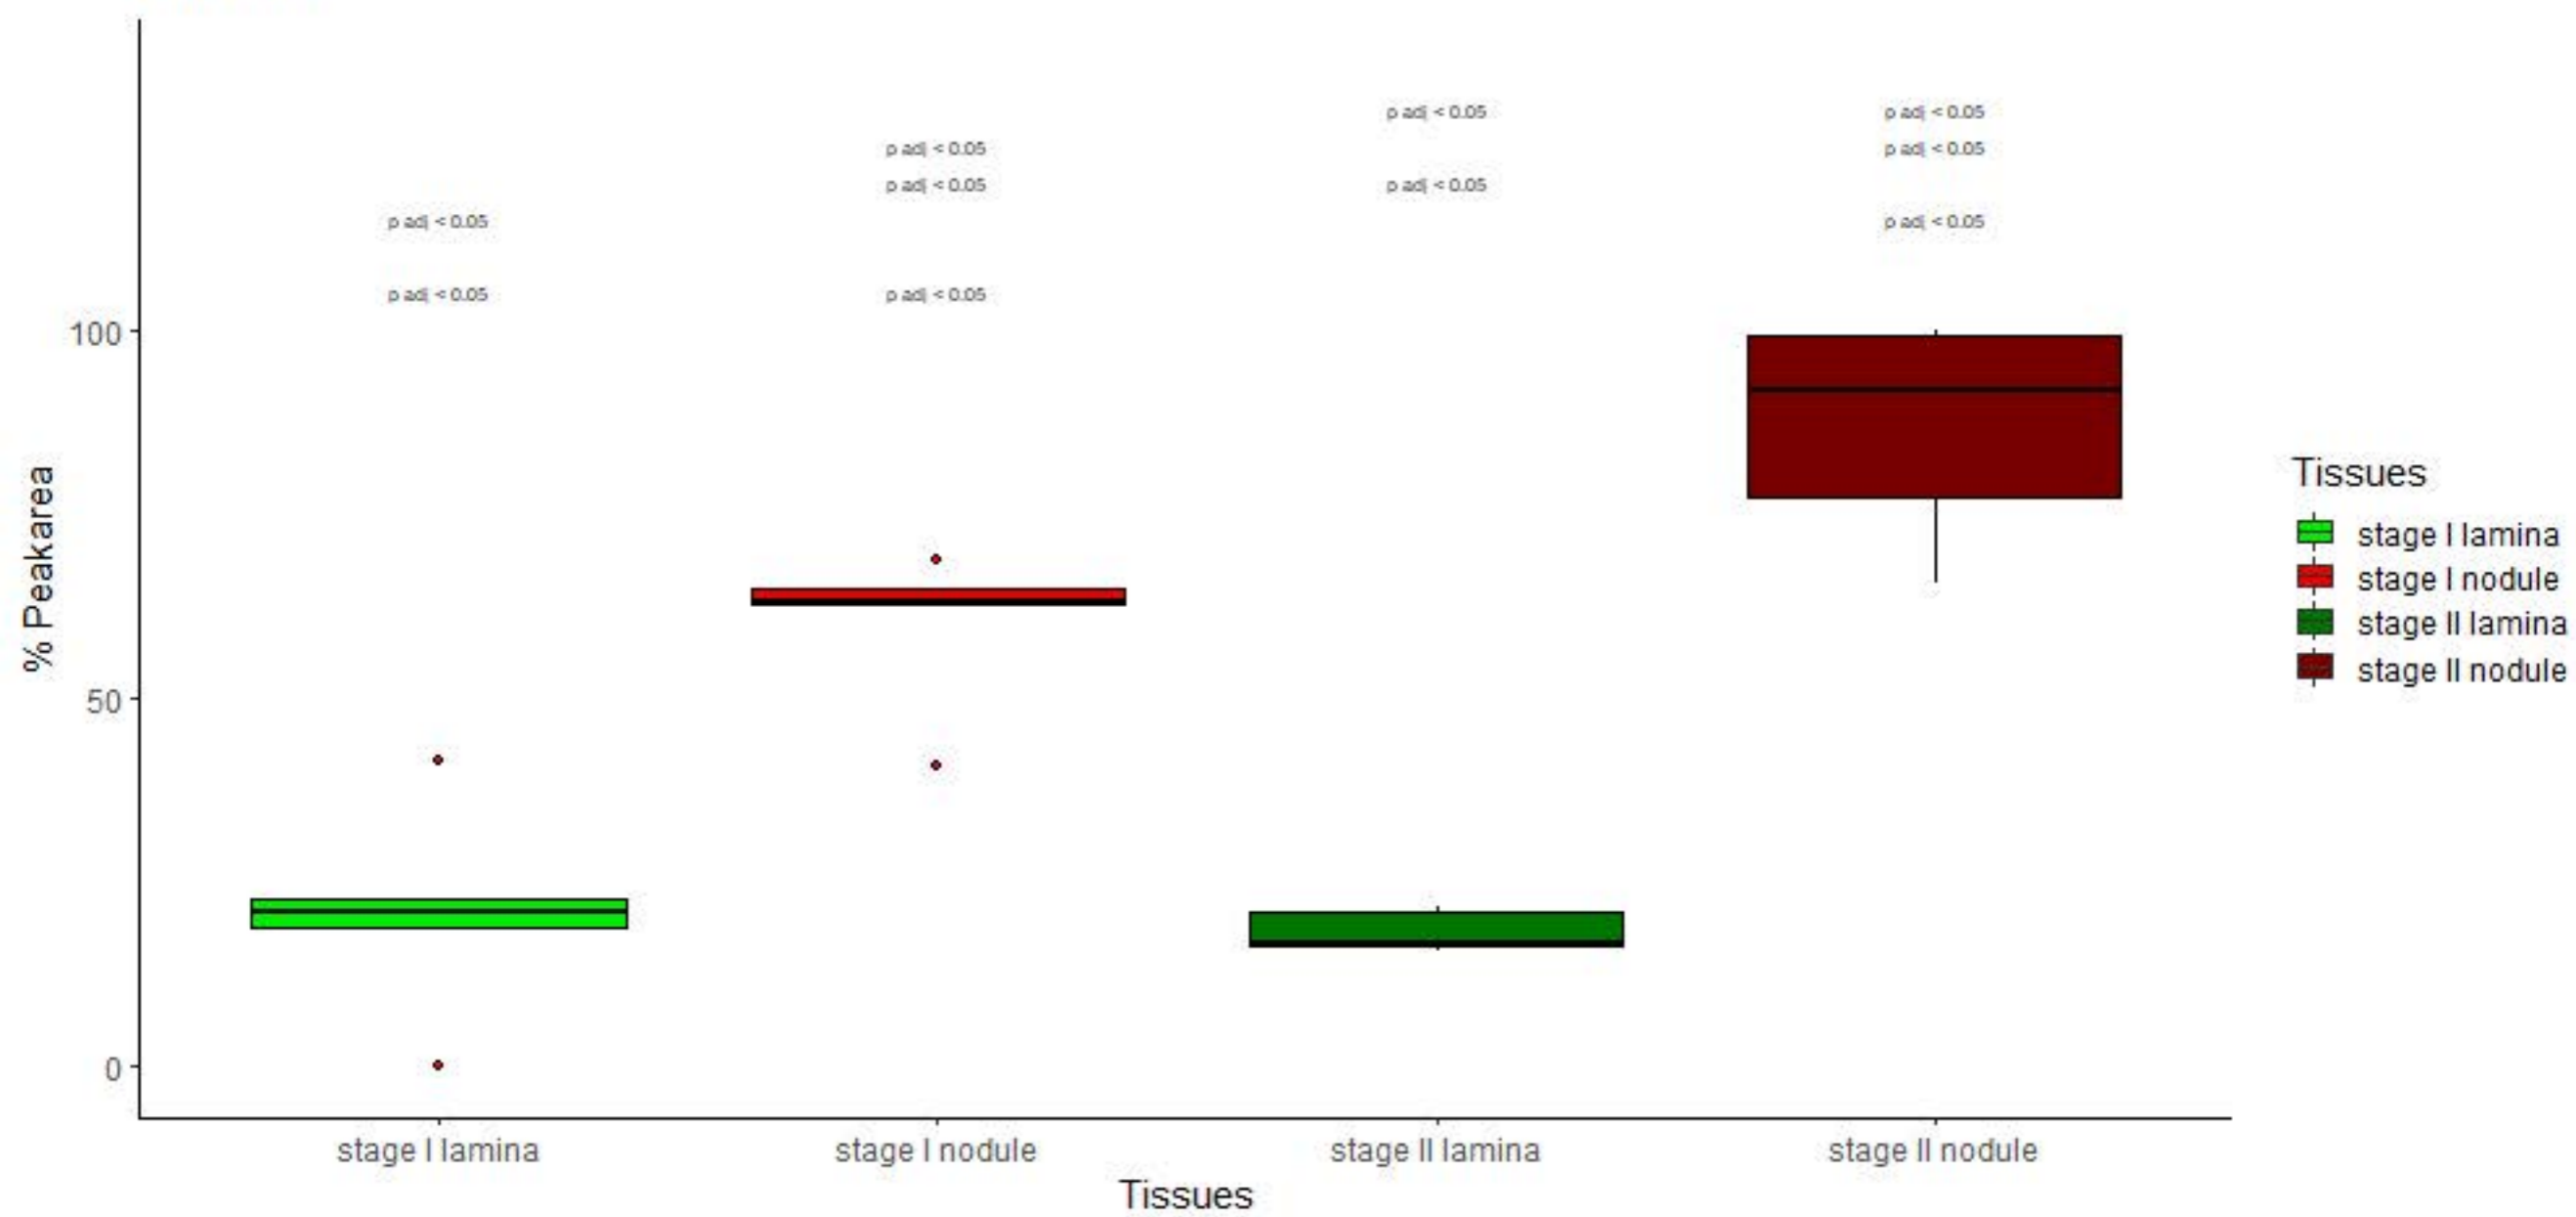



# Proline

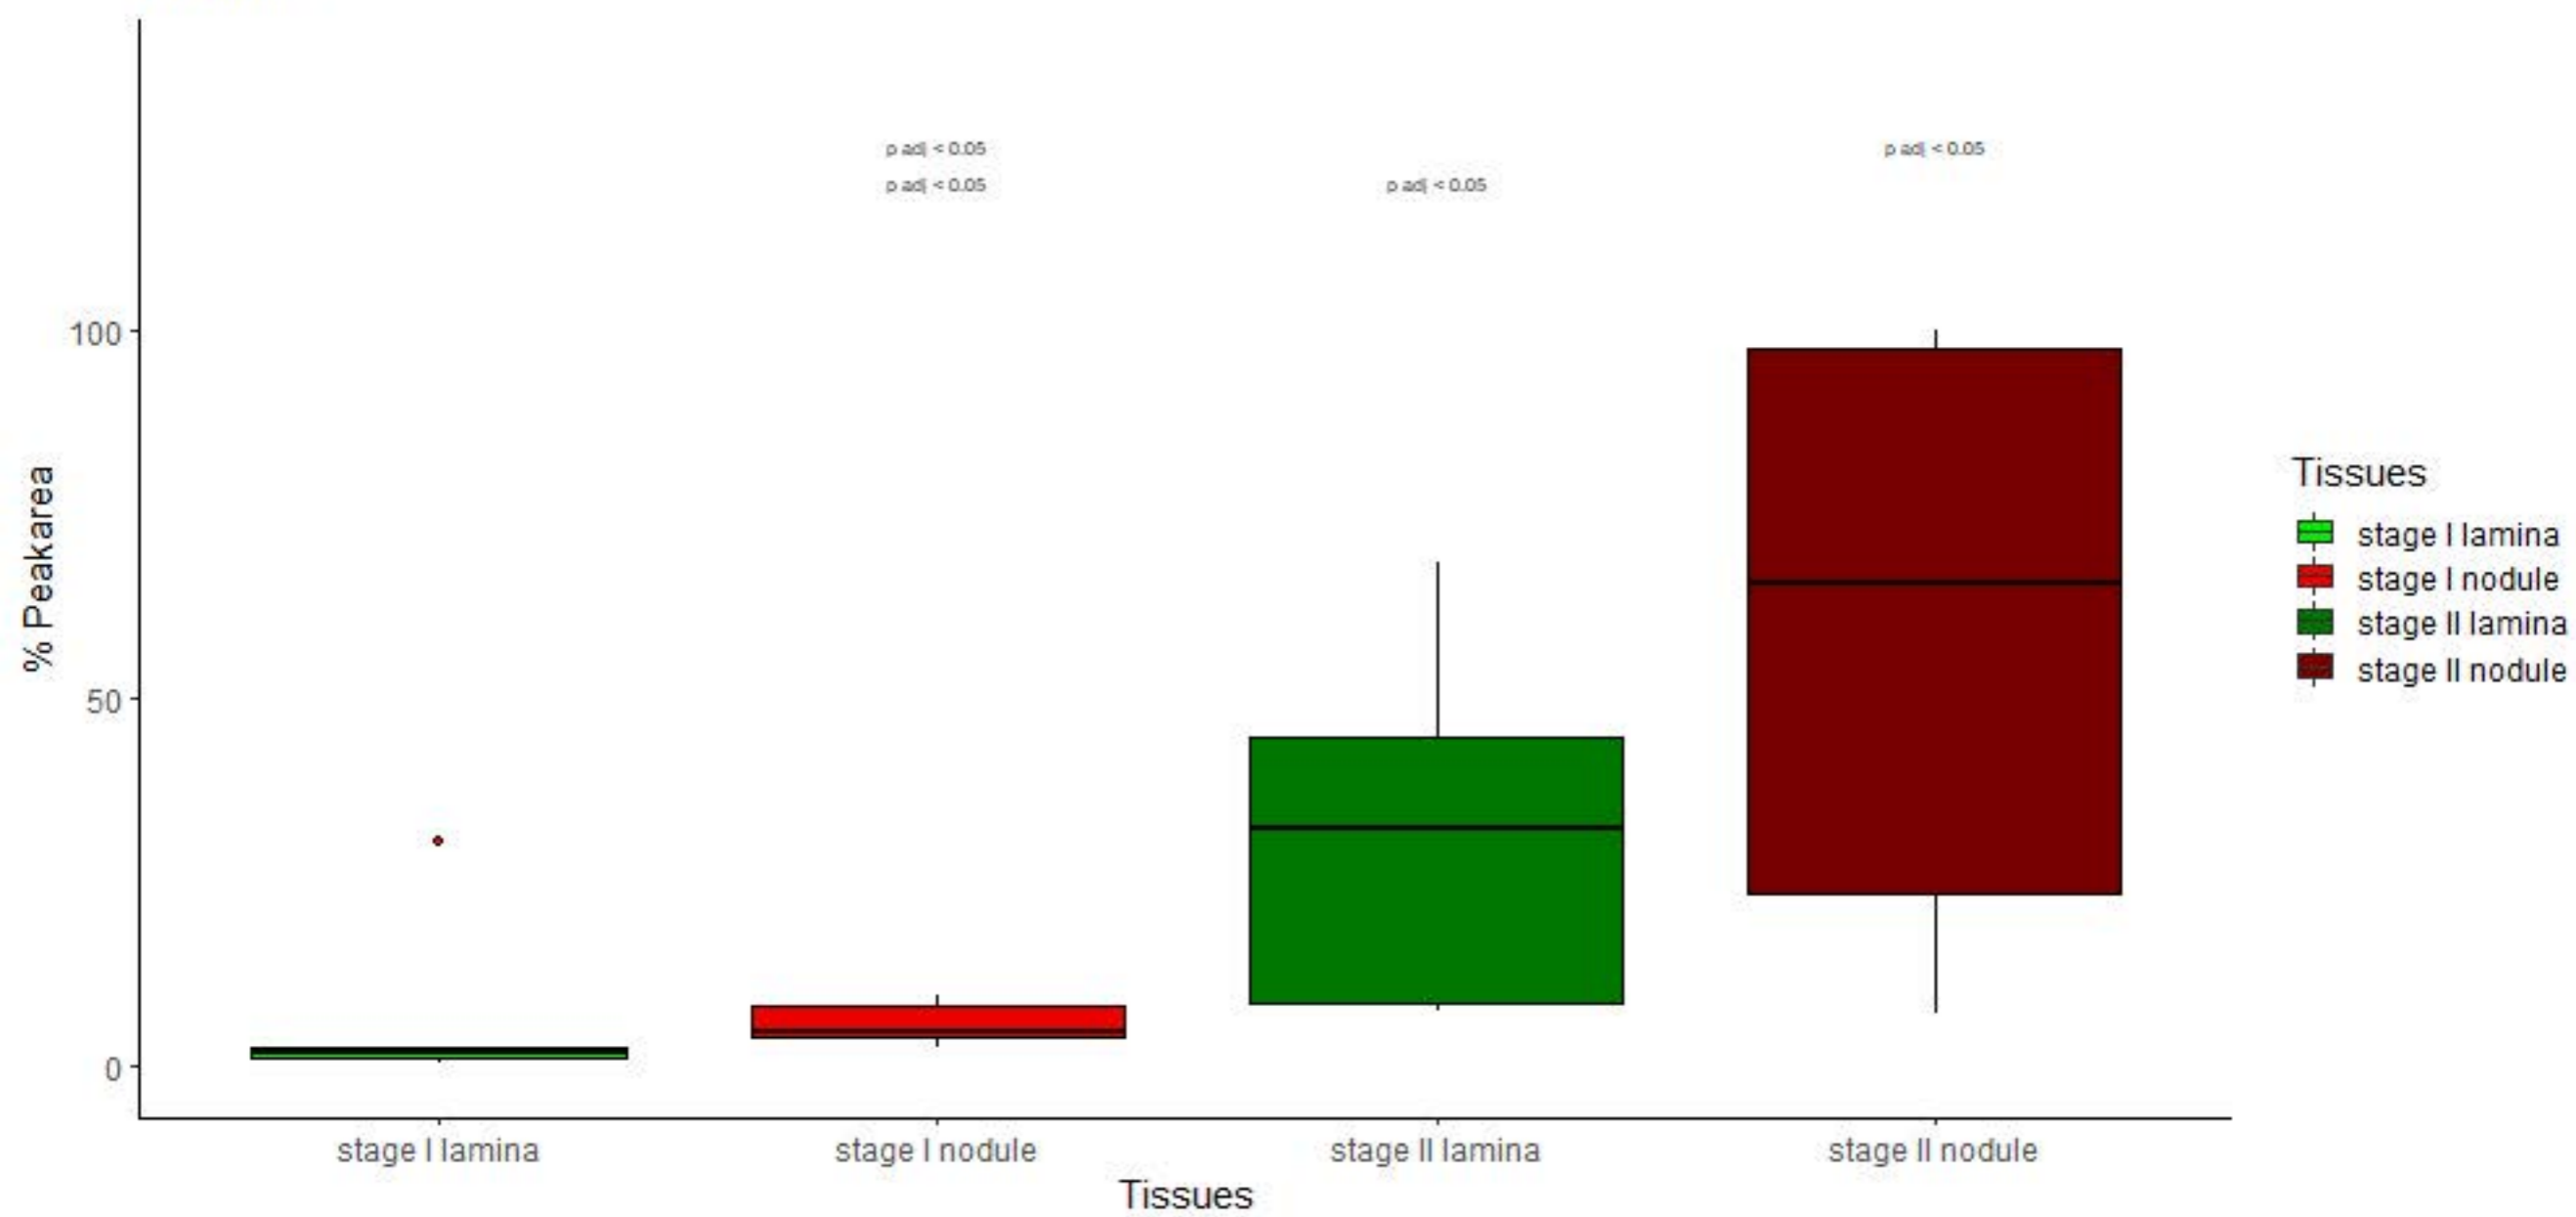

# Aspartic acid

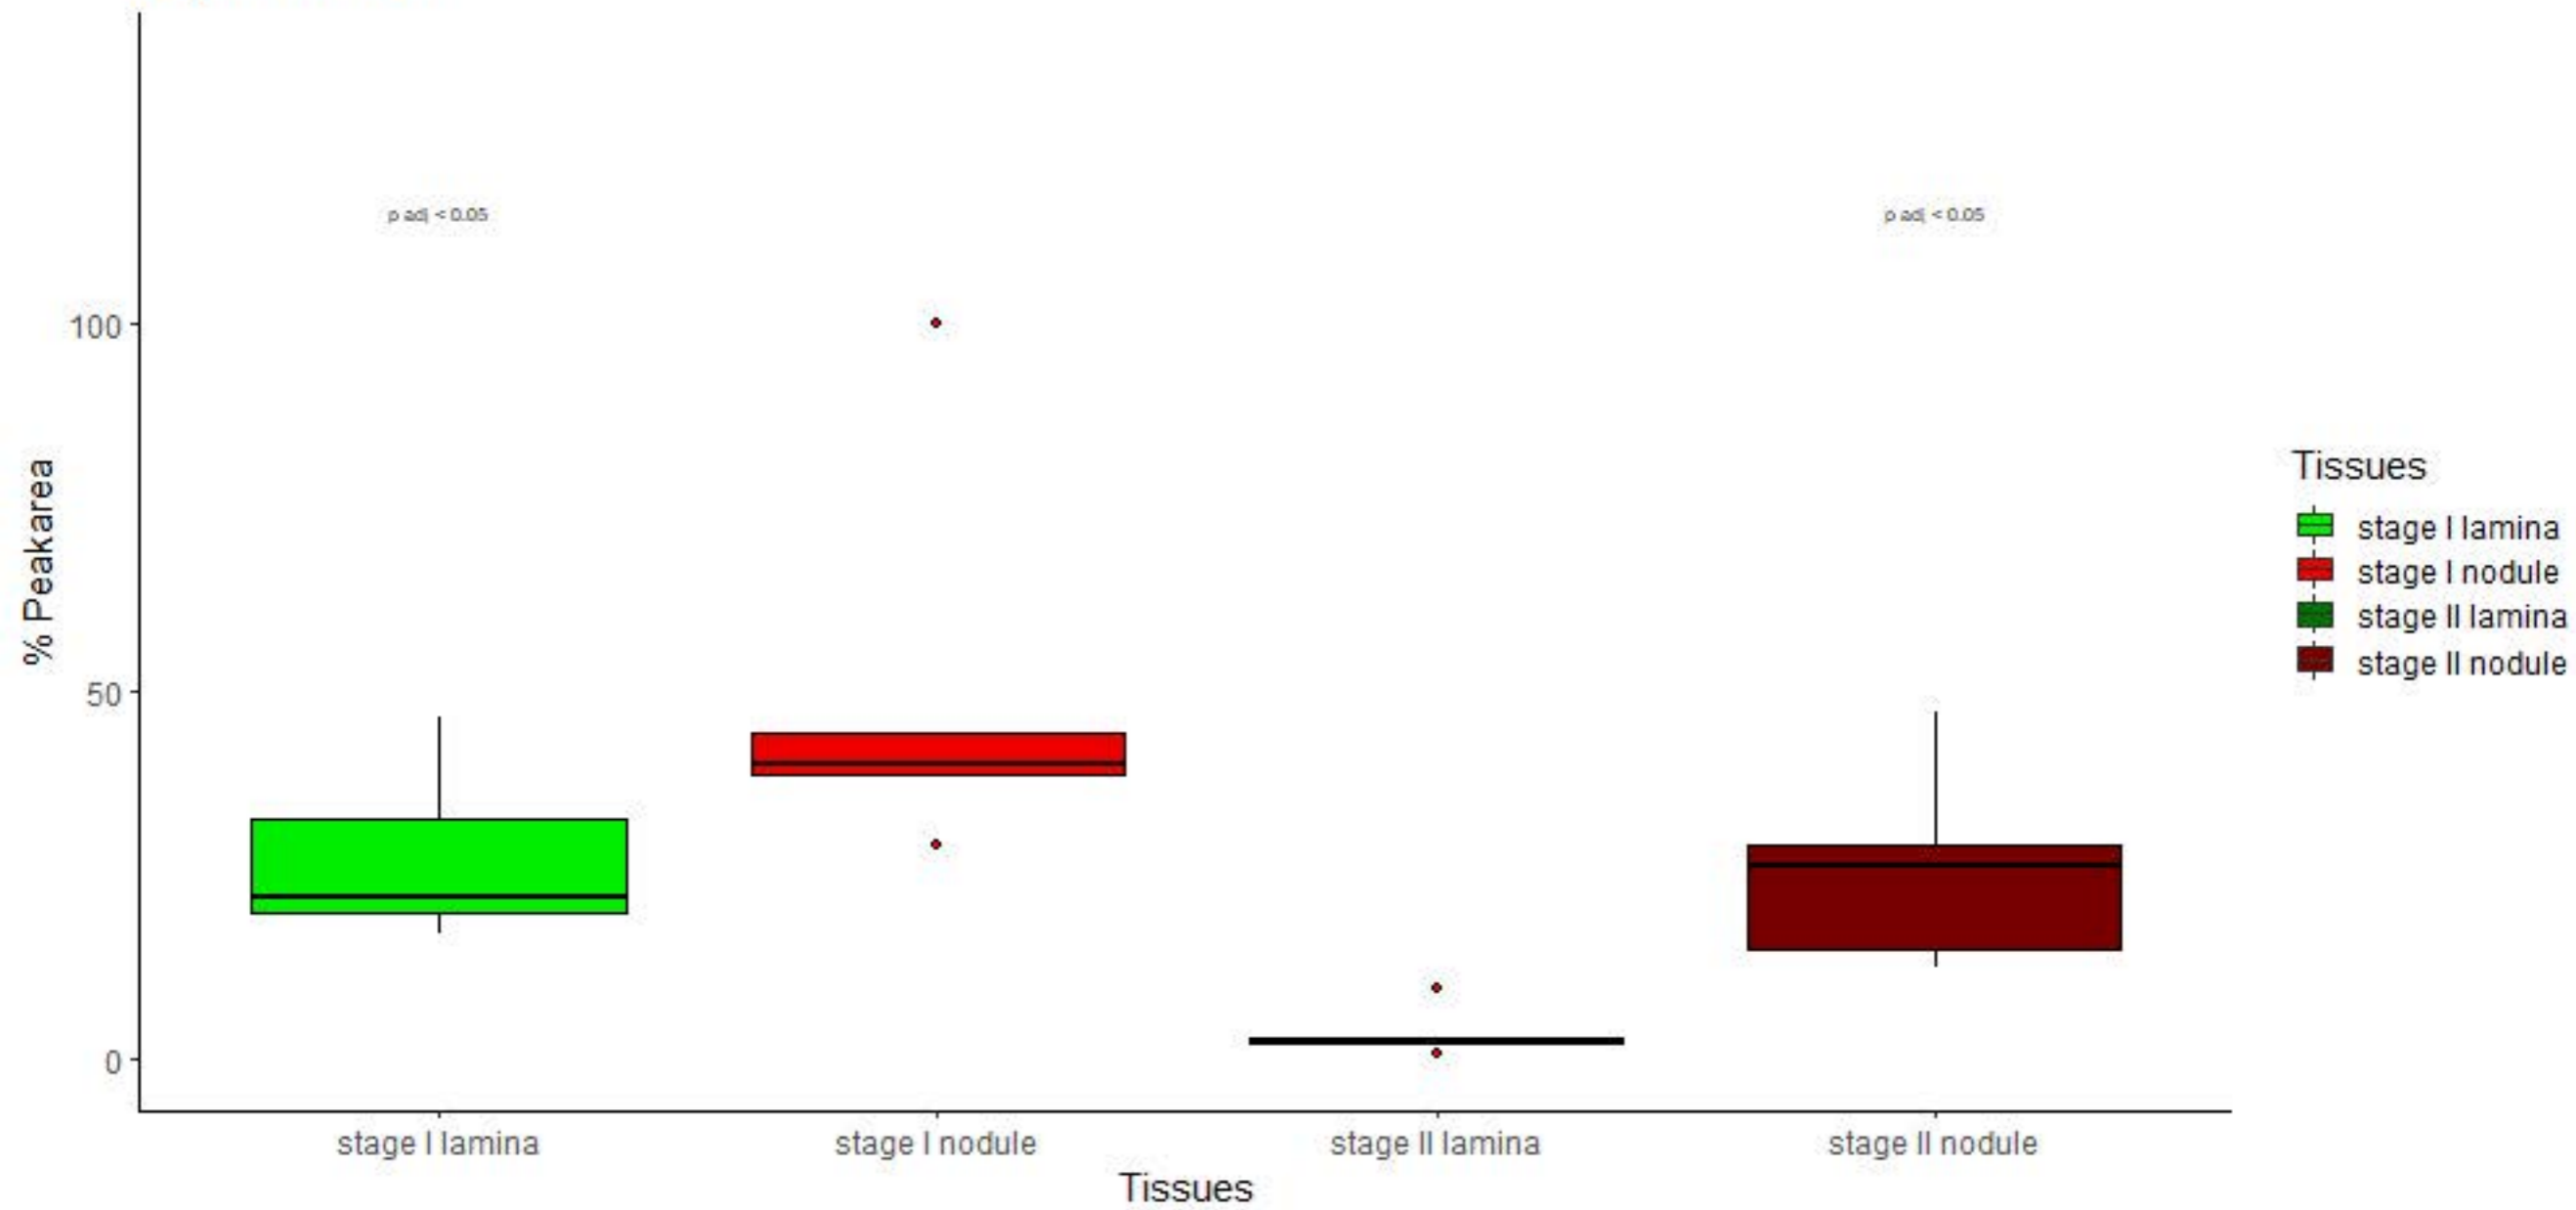

# Asparagine

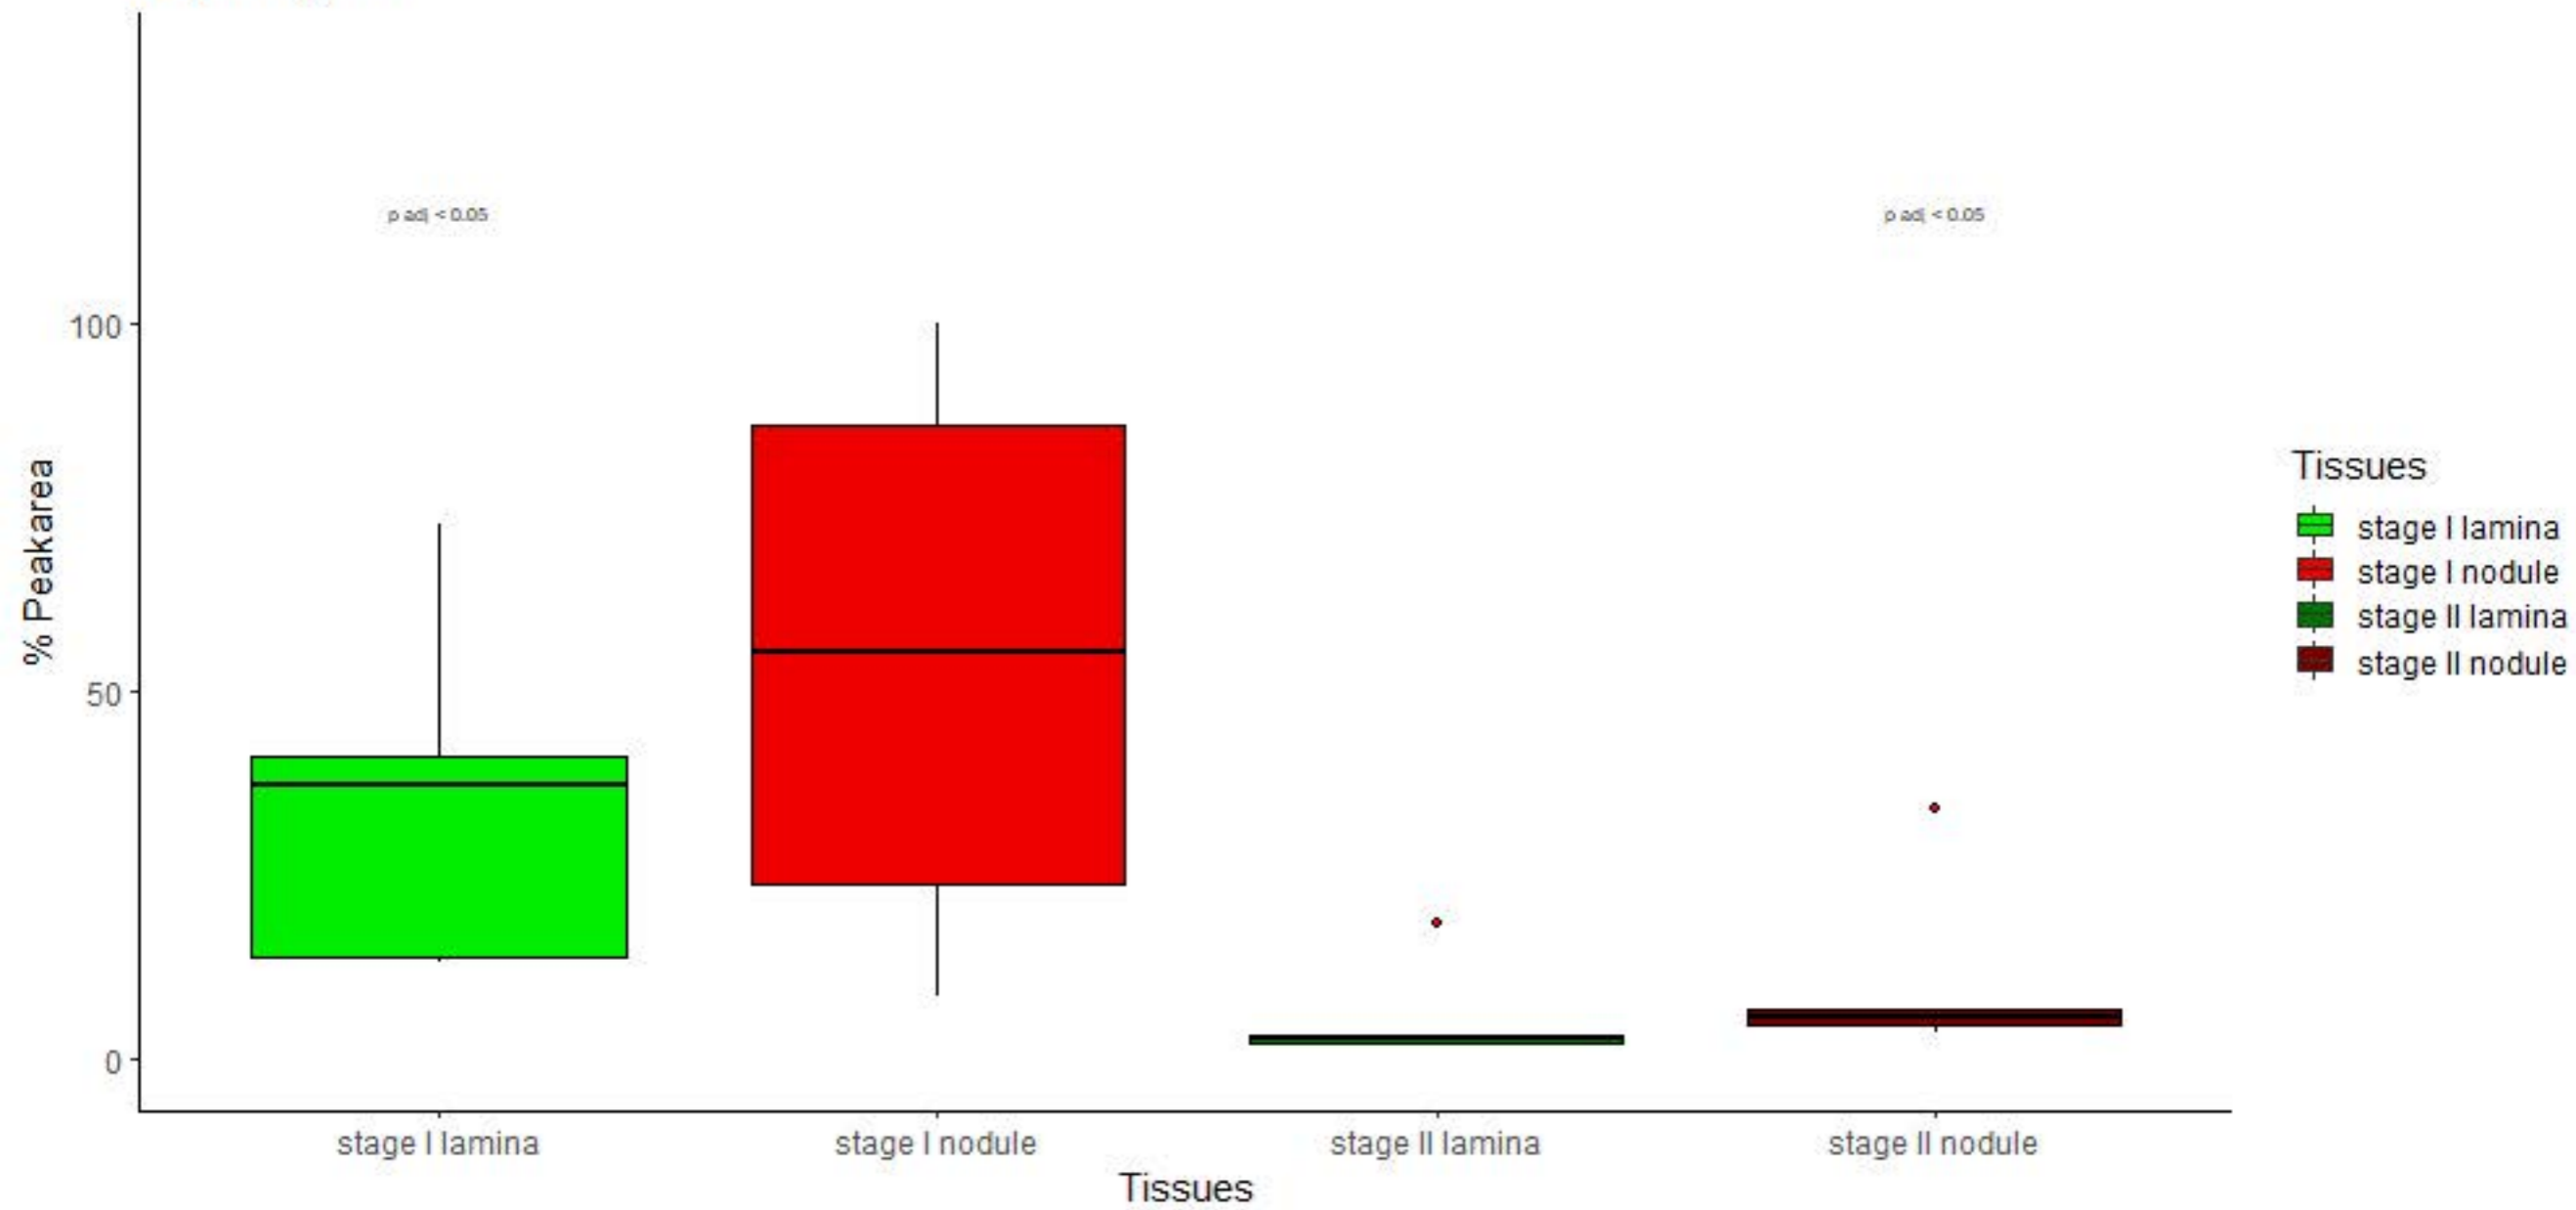

# Glutamic acid

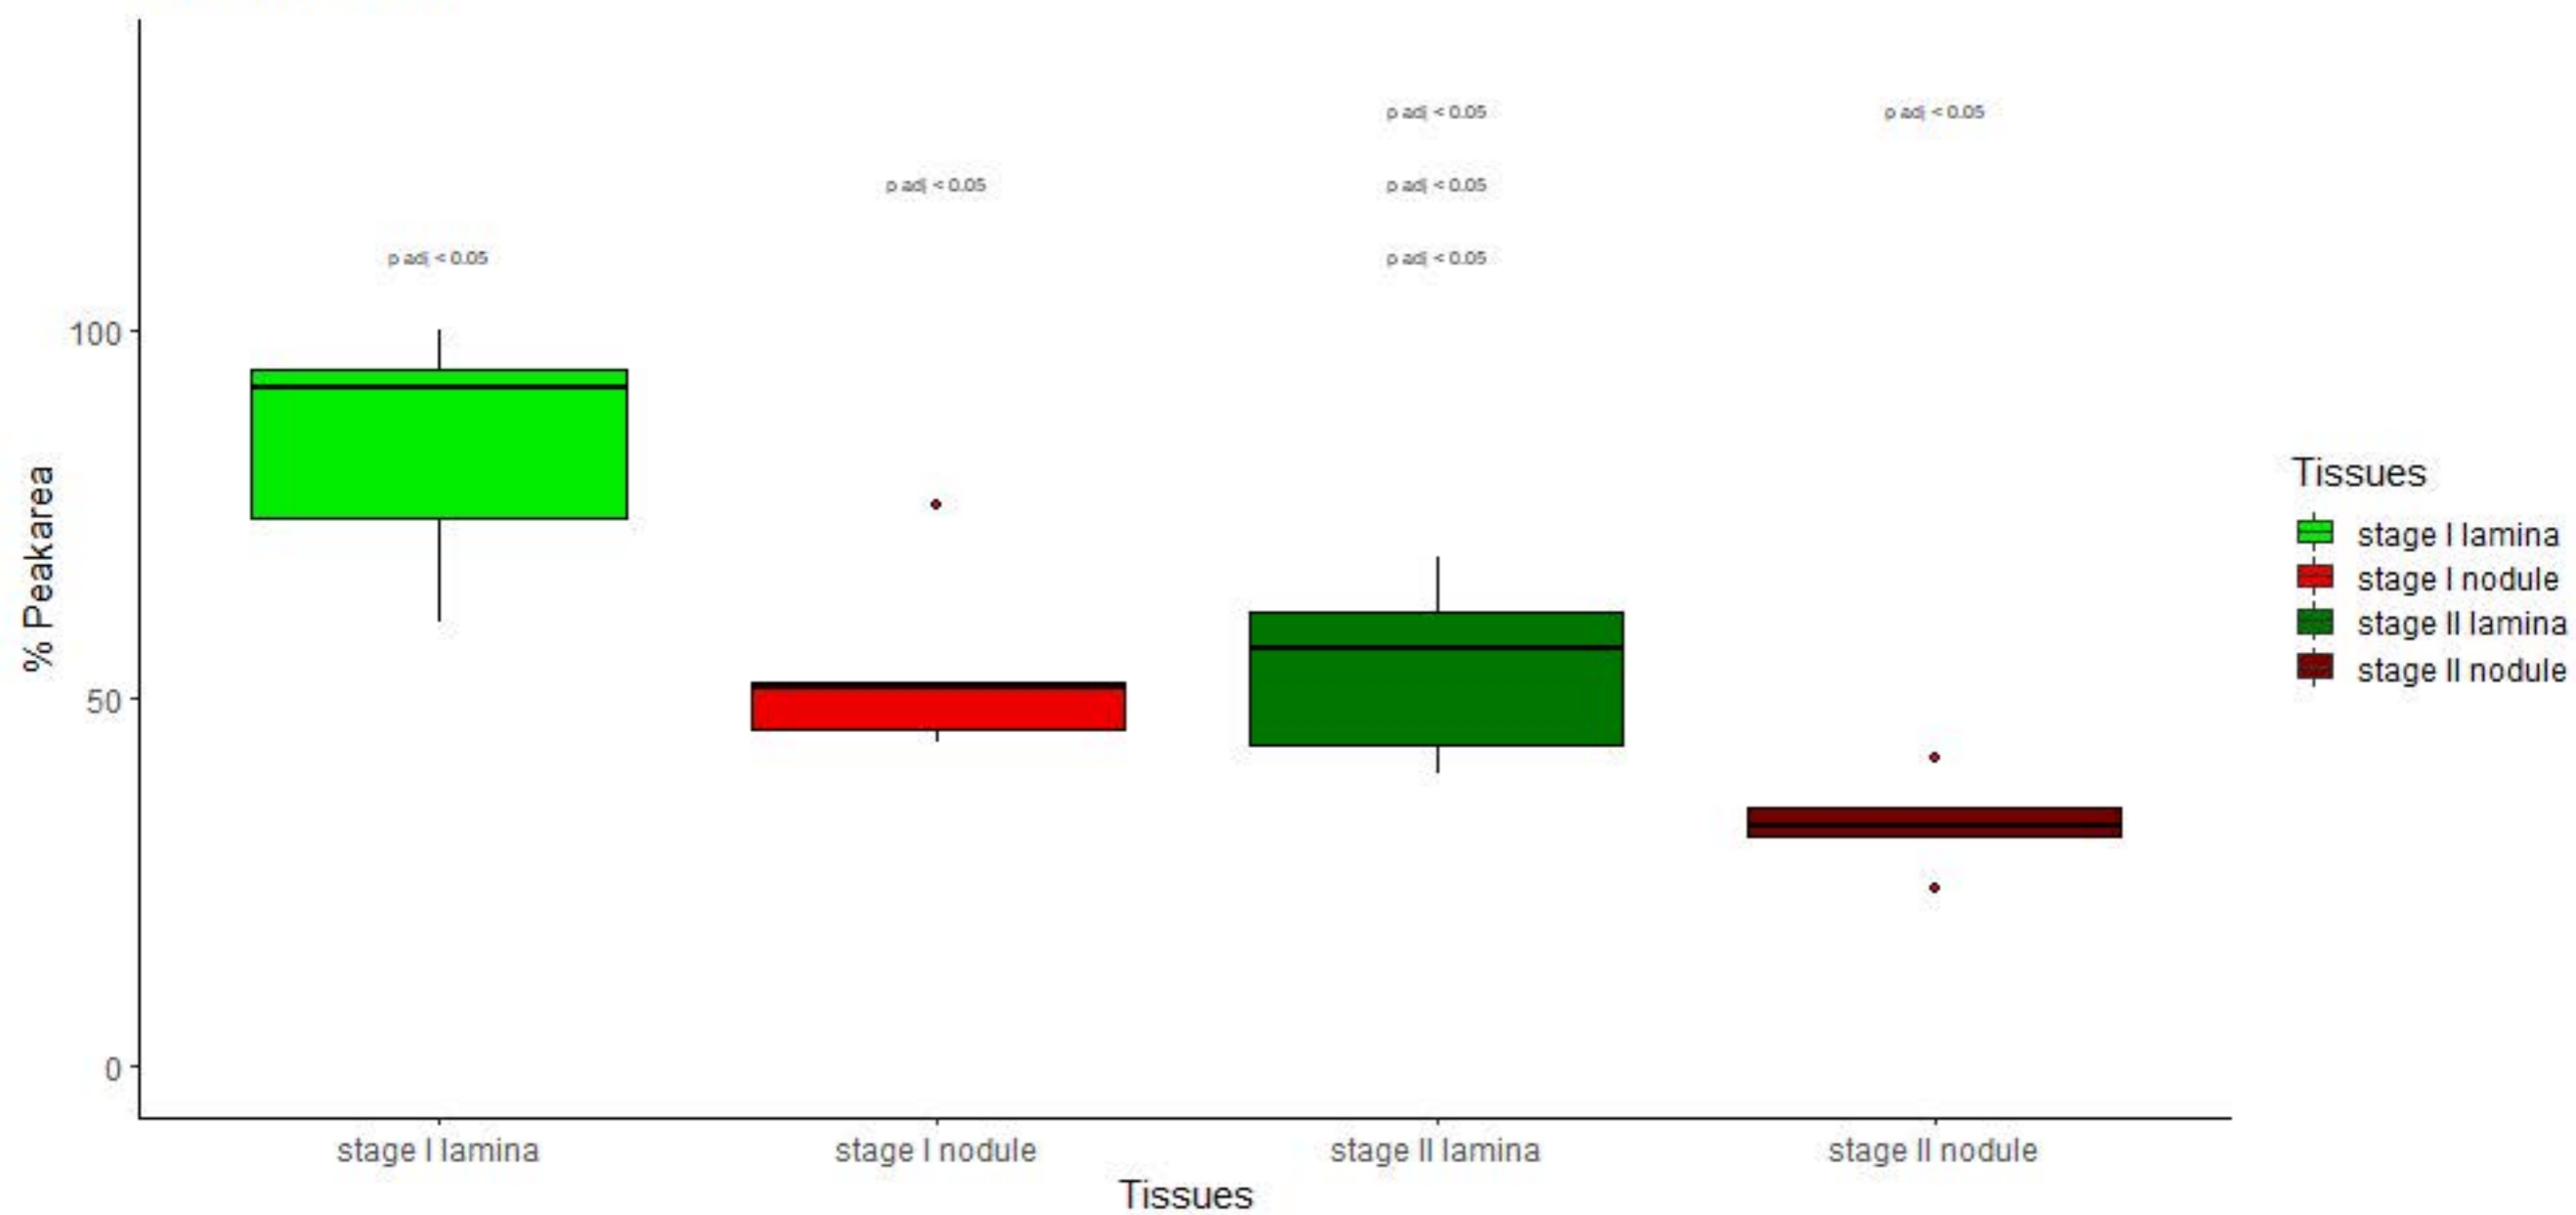

# Glutamine, DL-

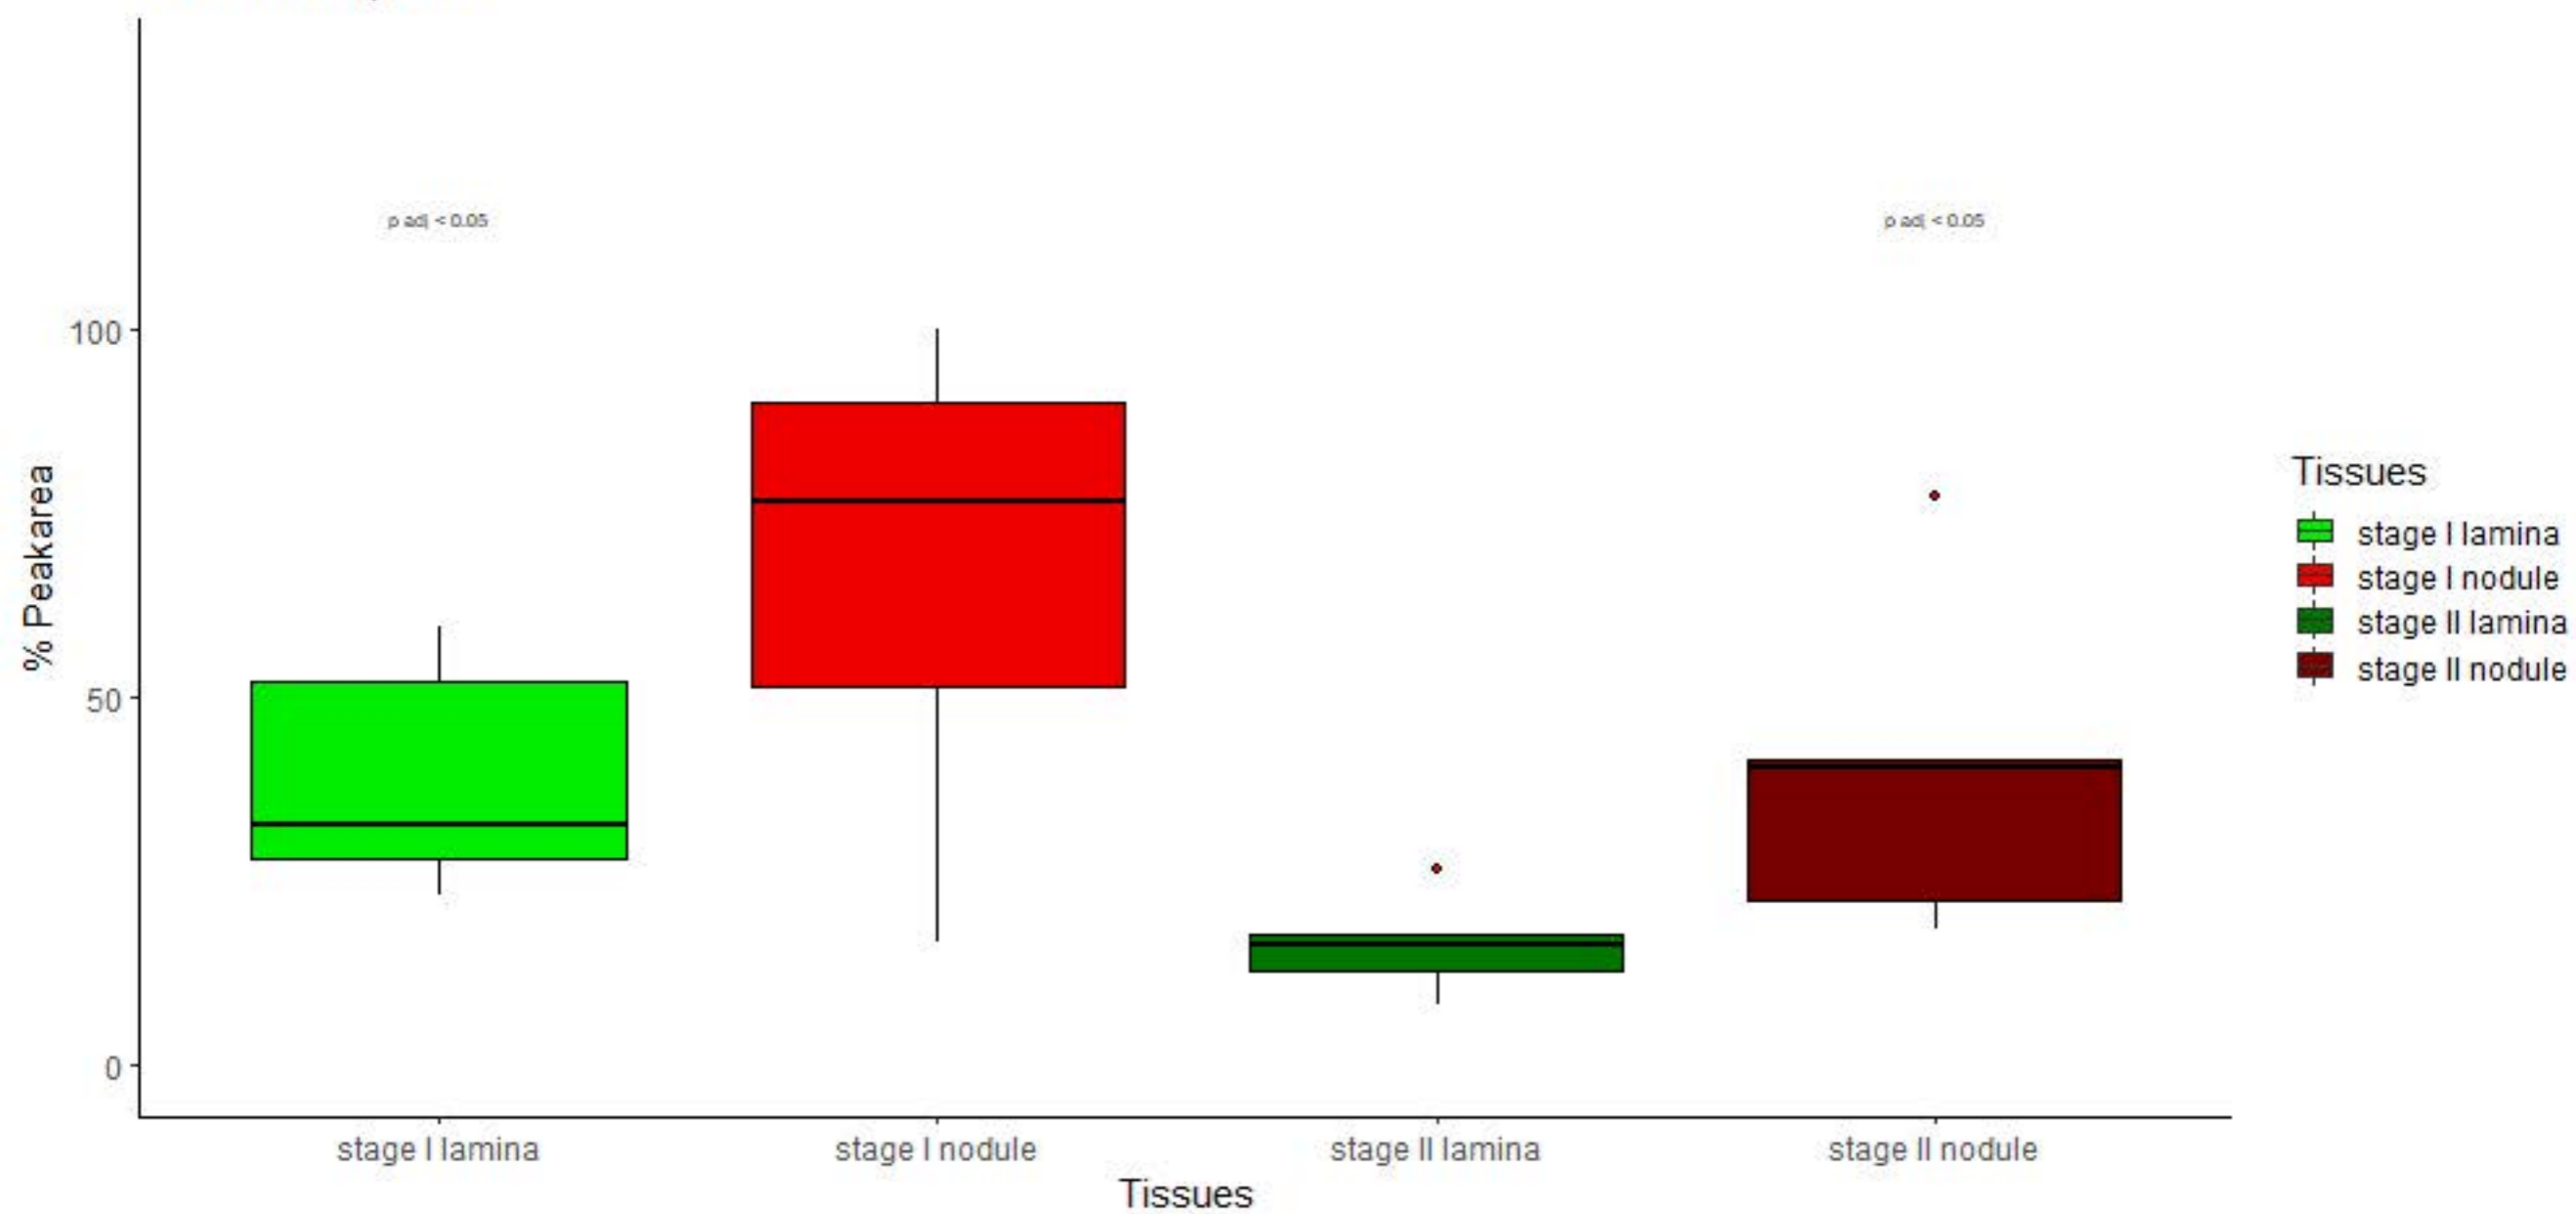

# Phenylalanine

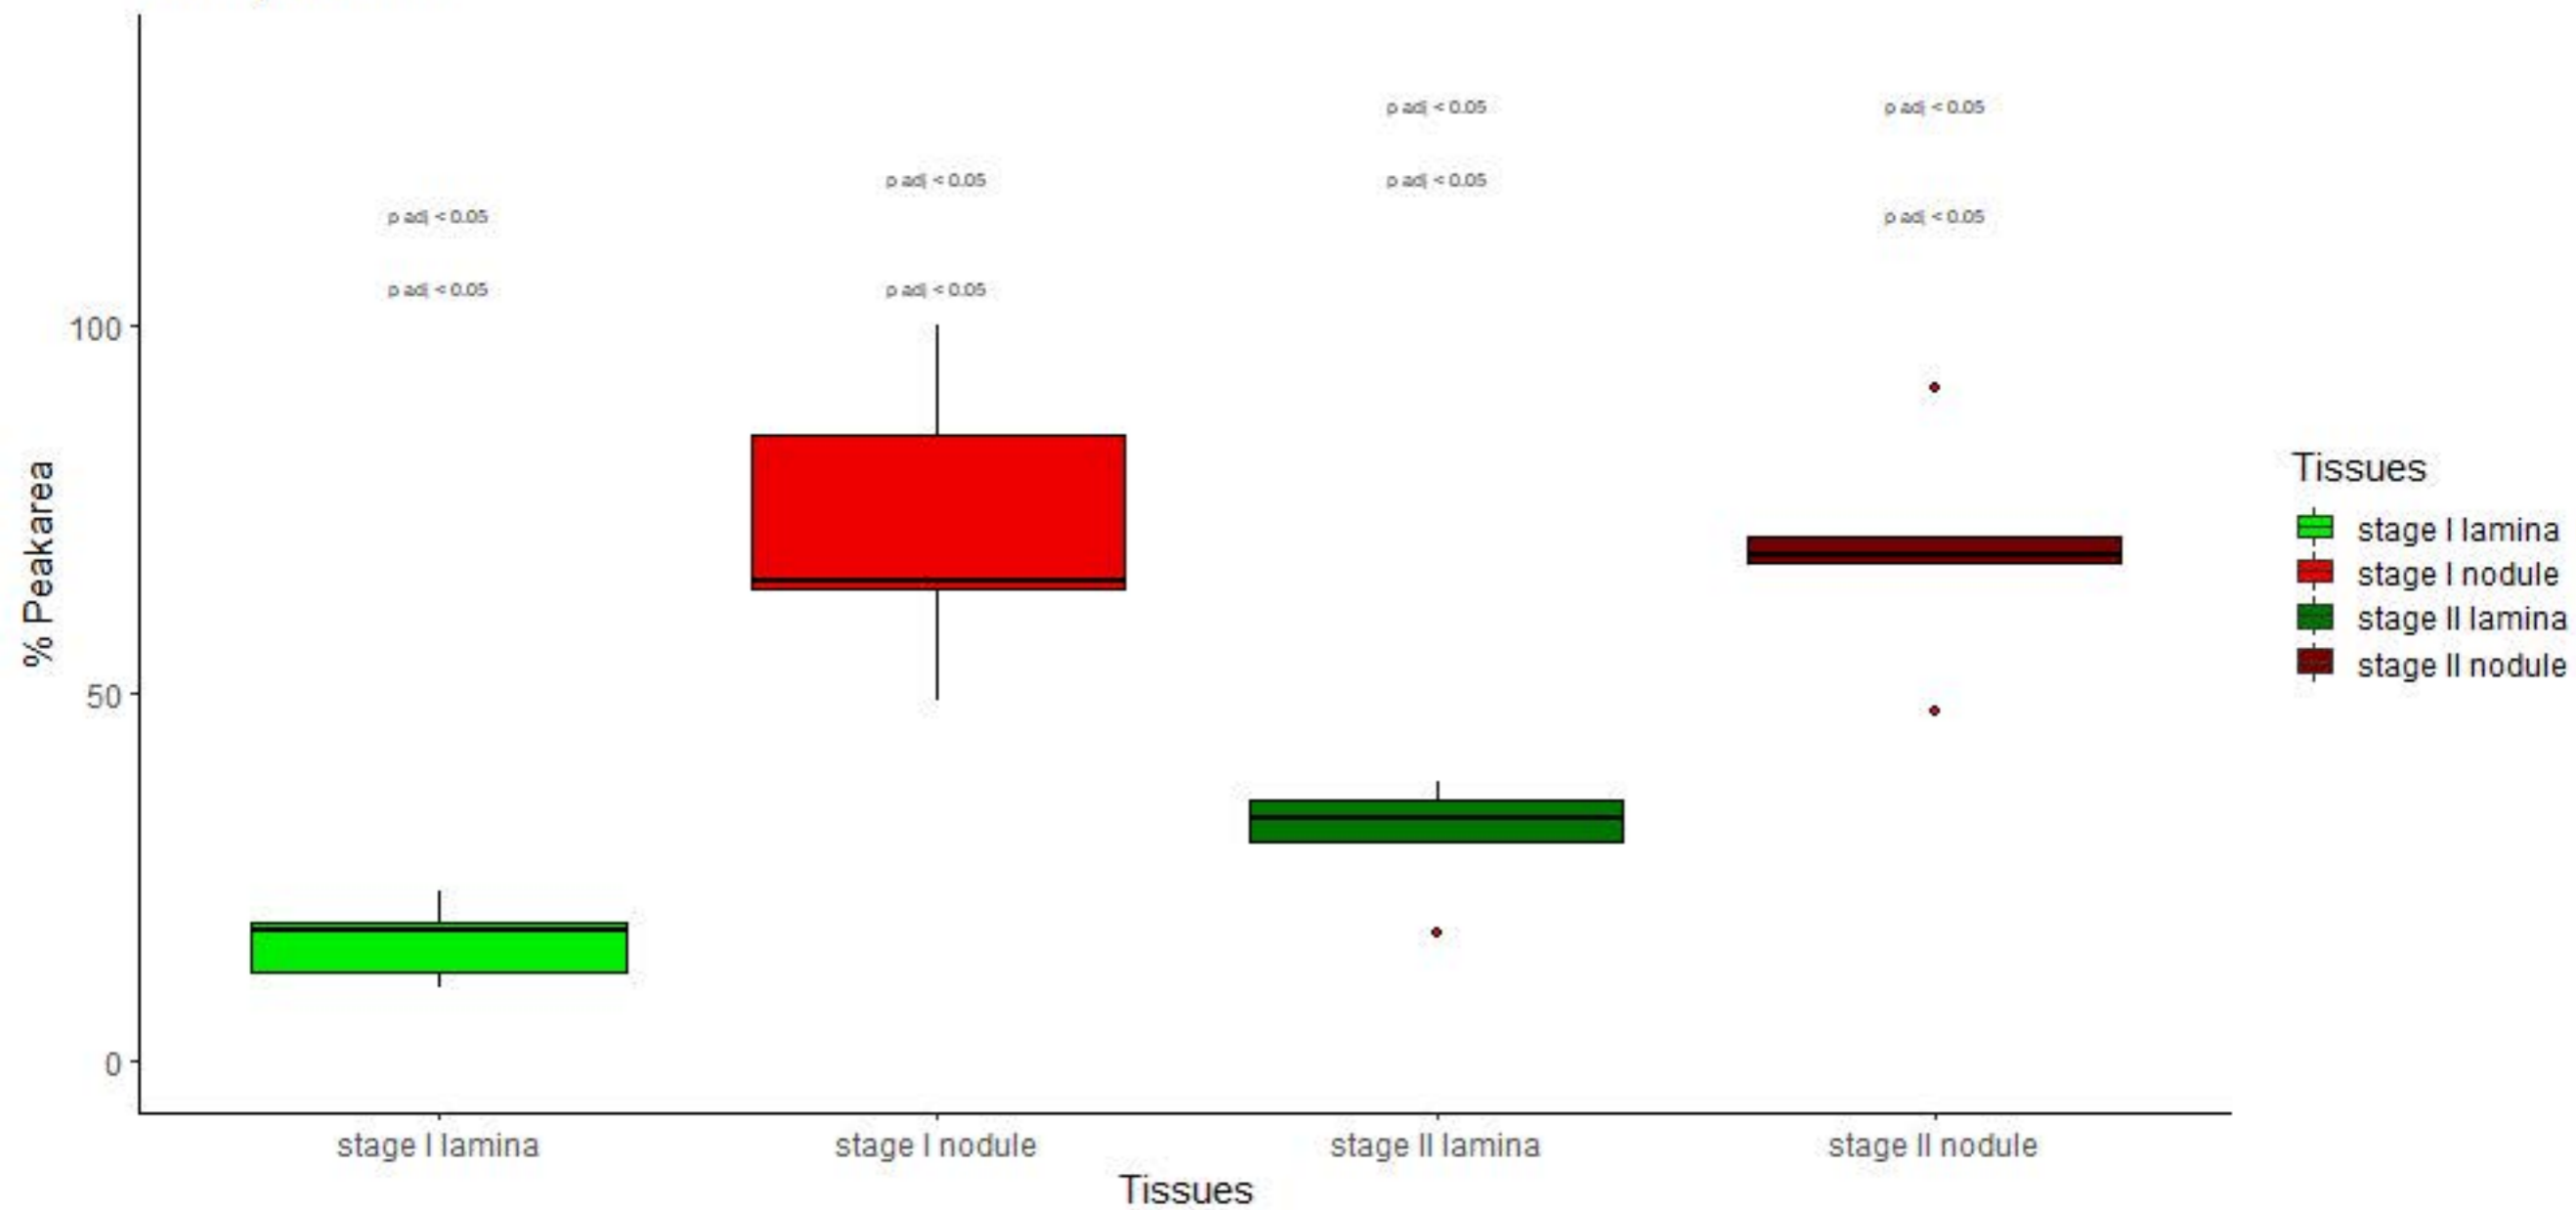

# Tryptophan

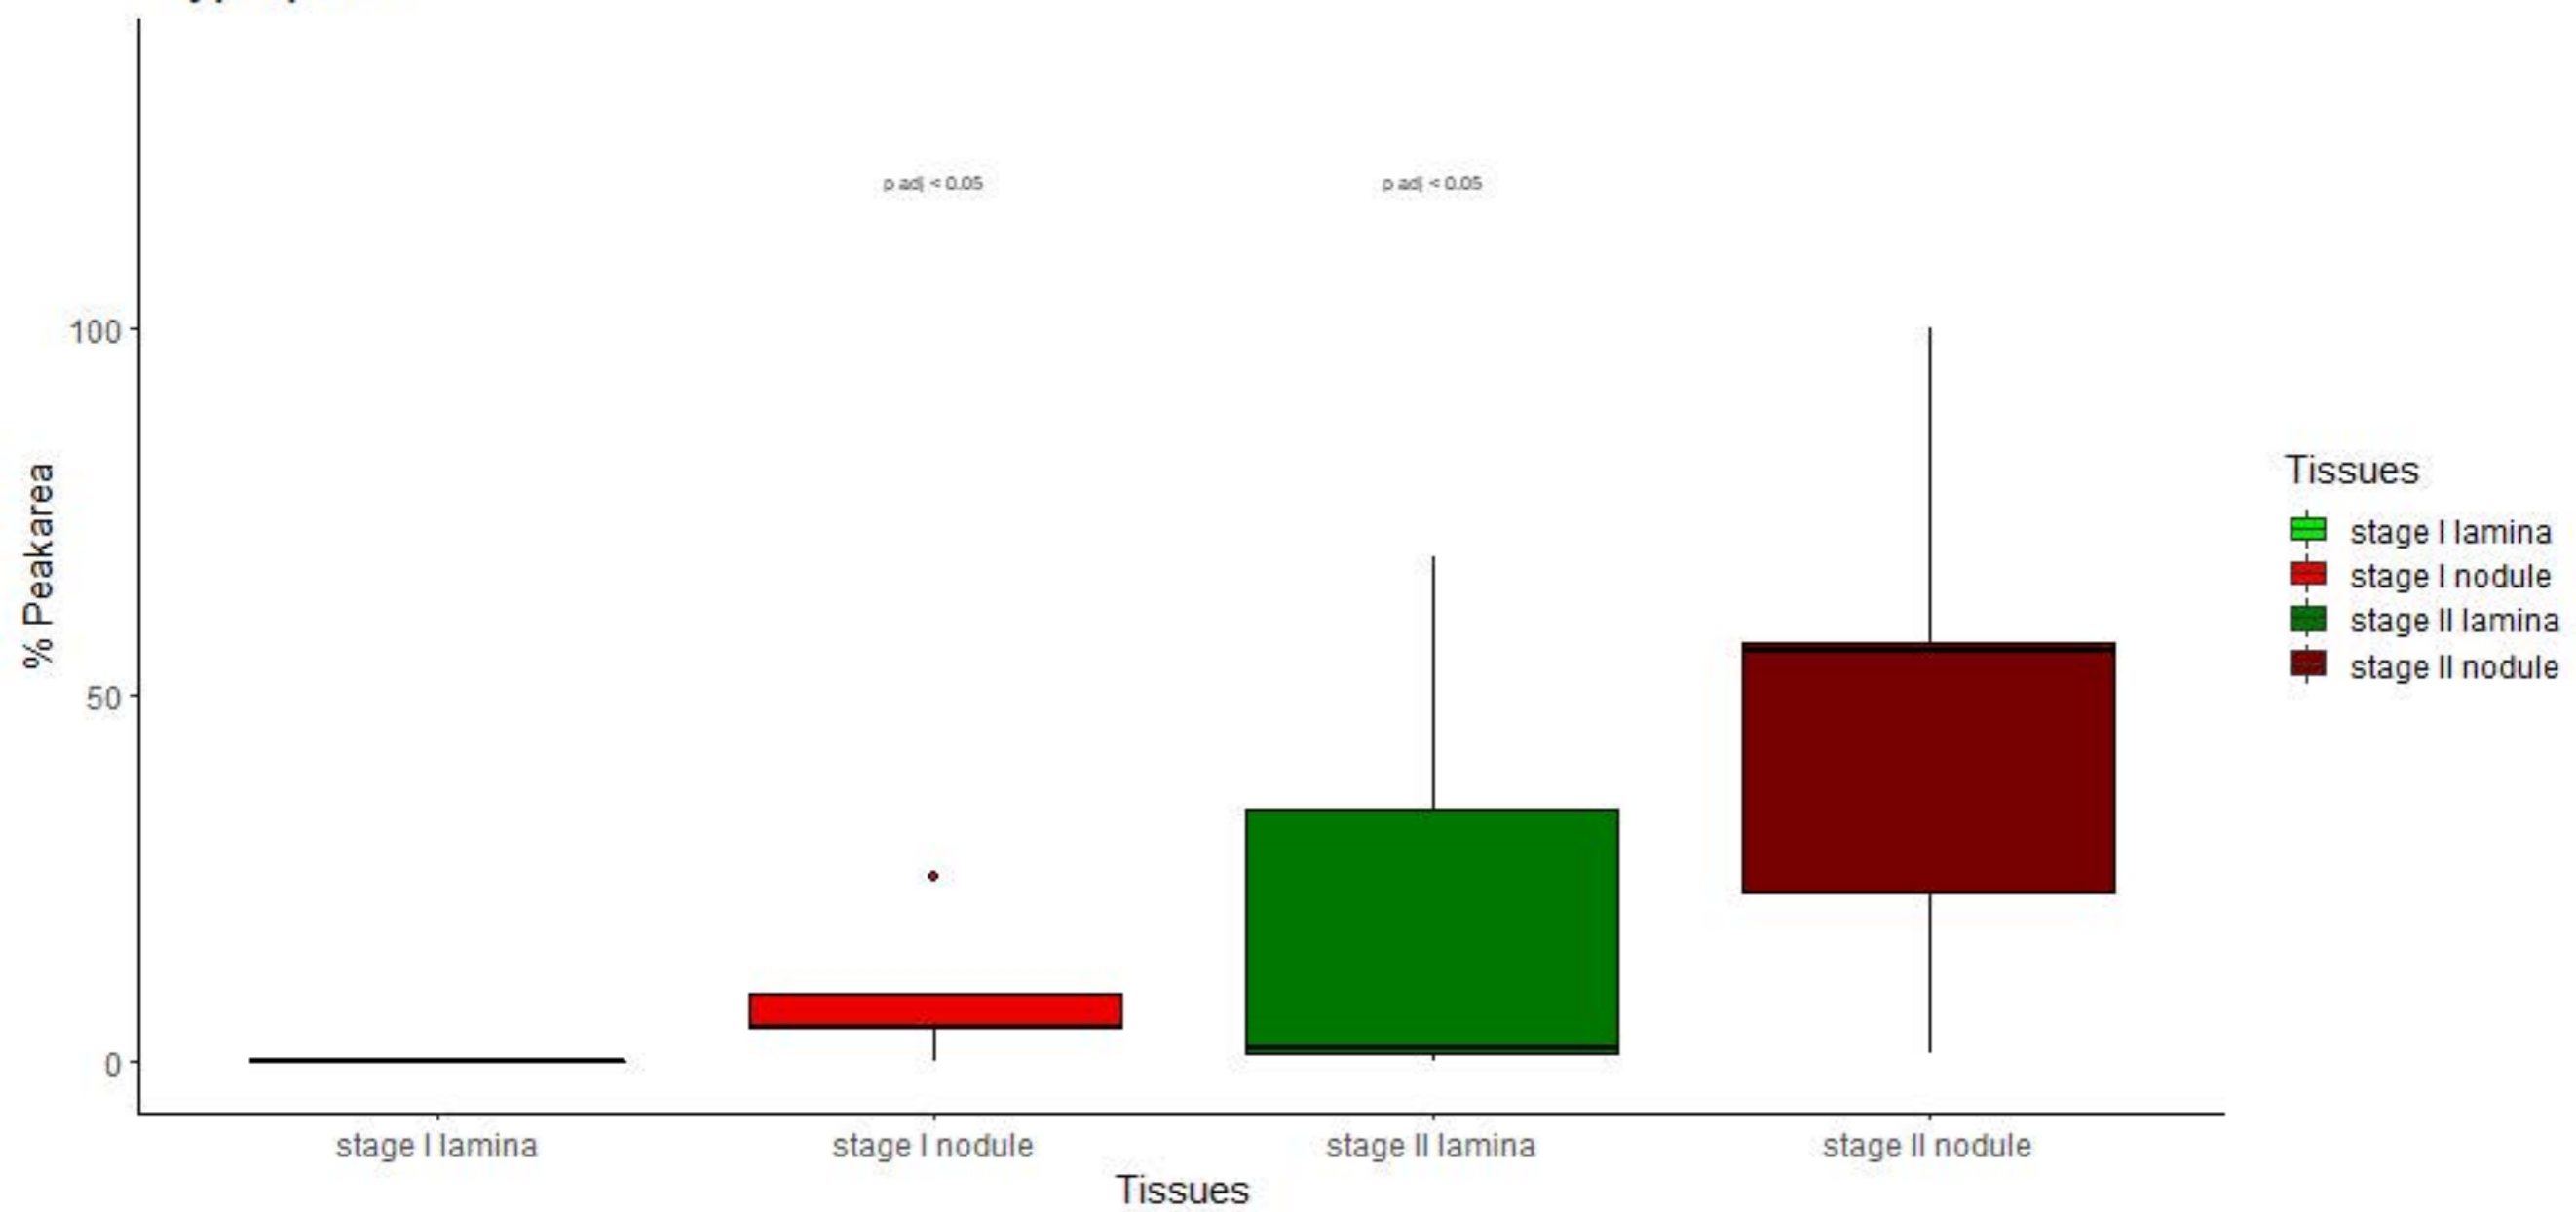

# Methionine

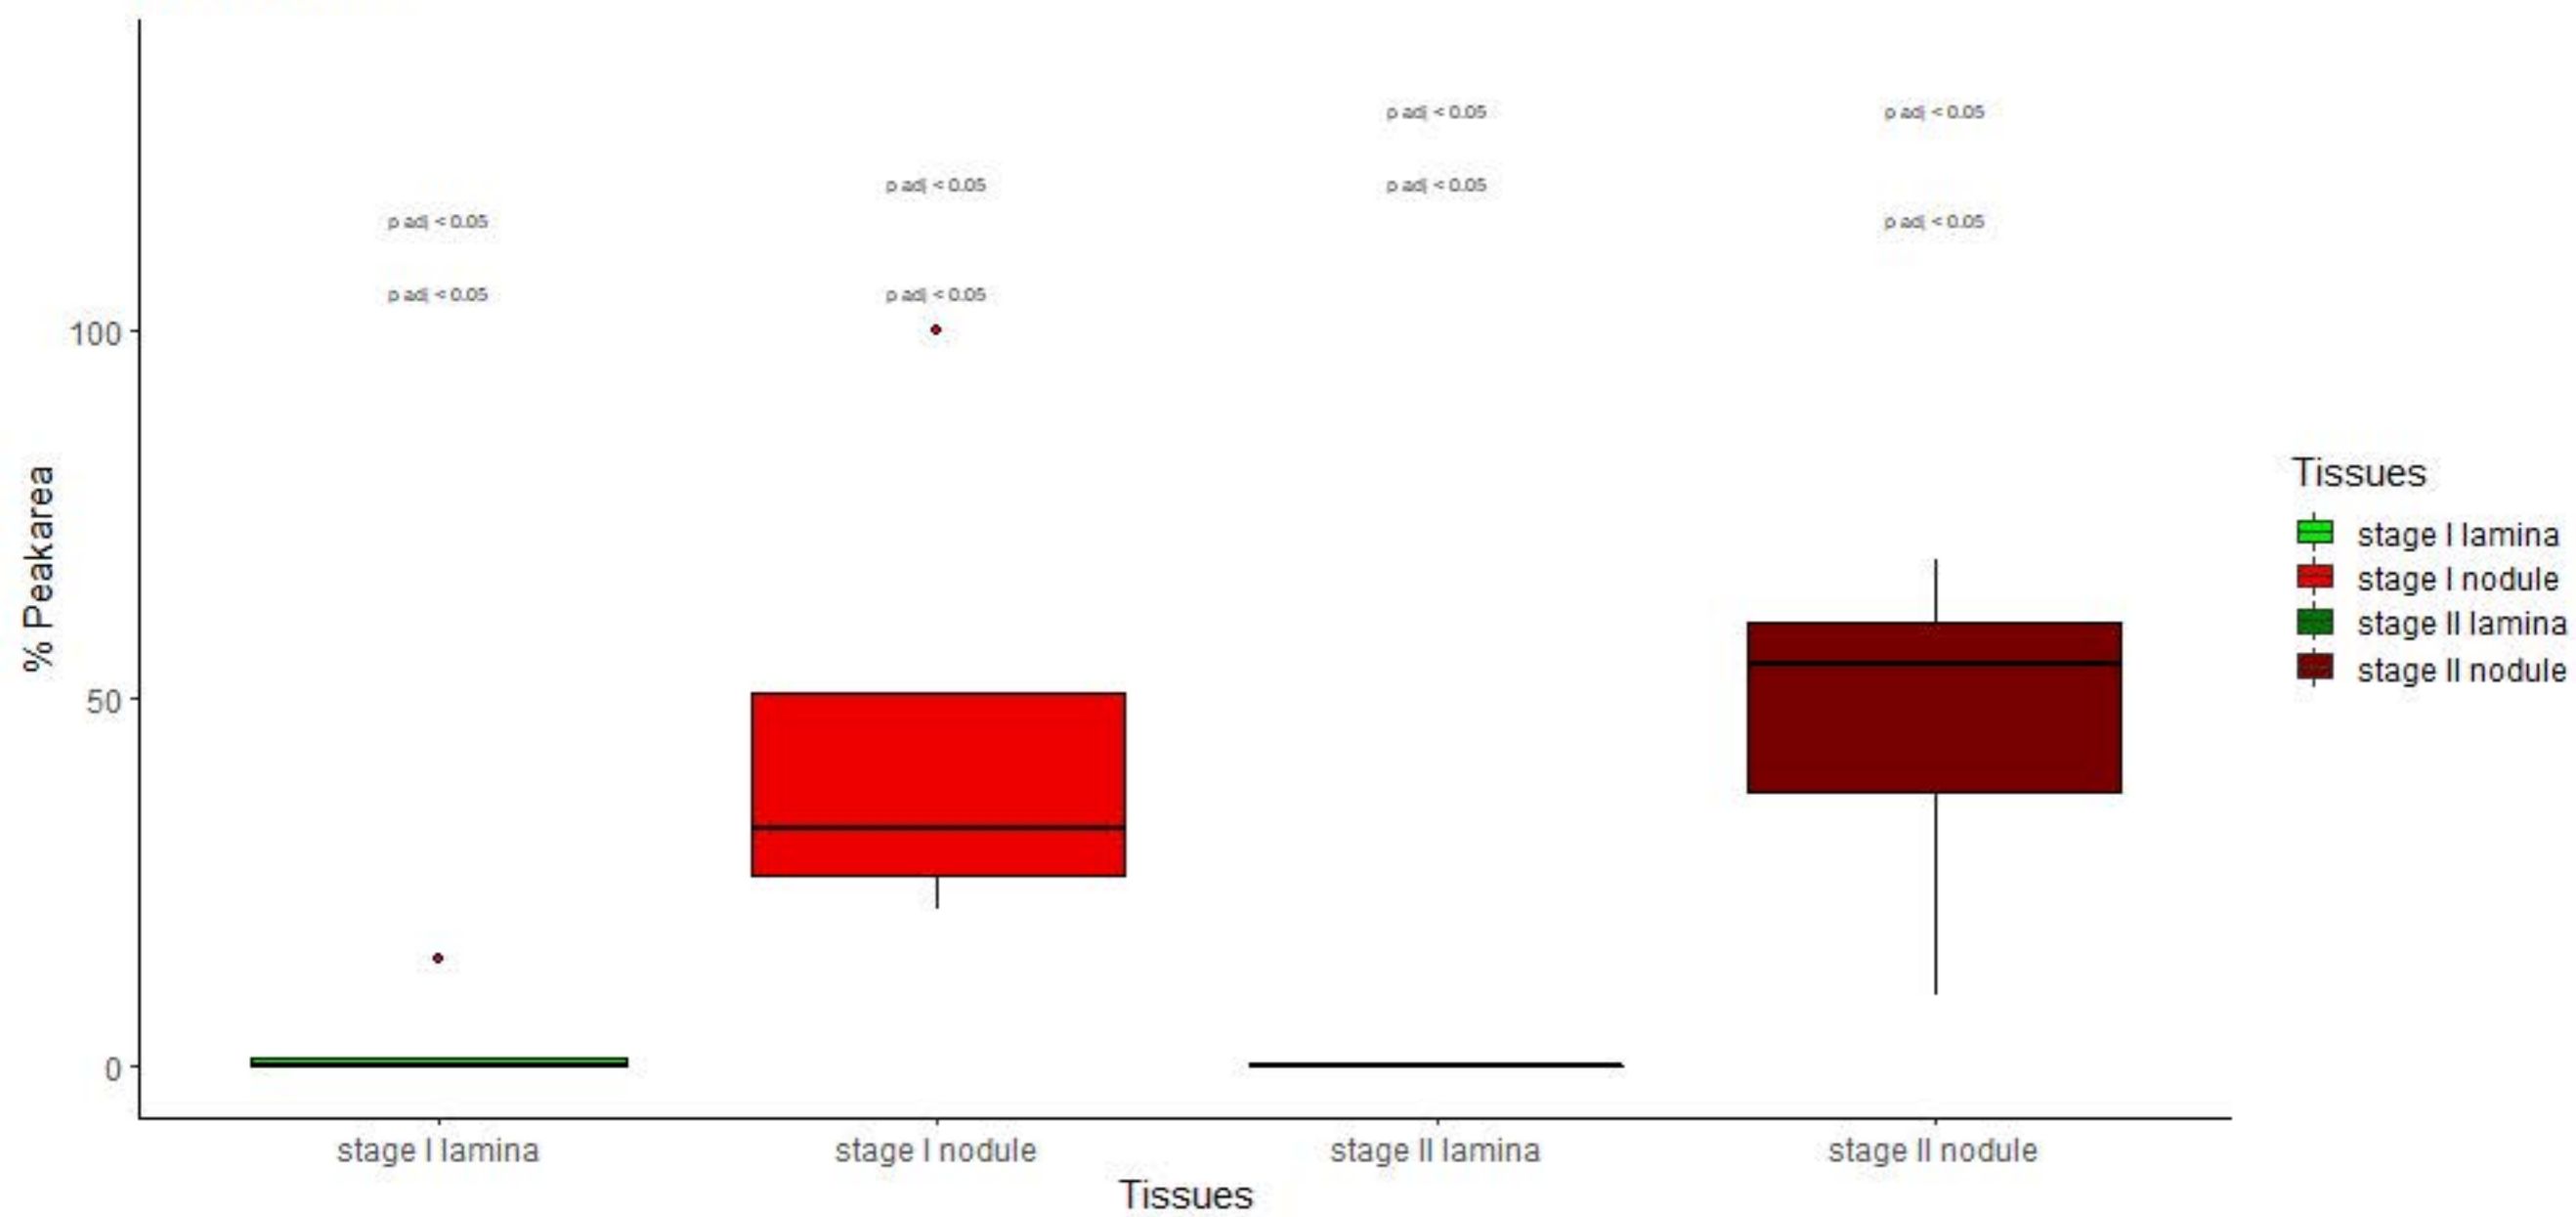



# ART Cysteine?

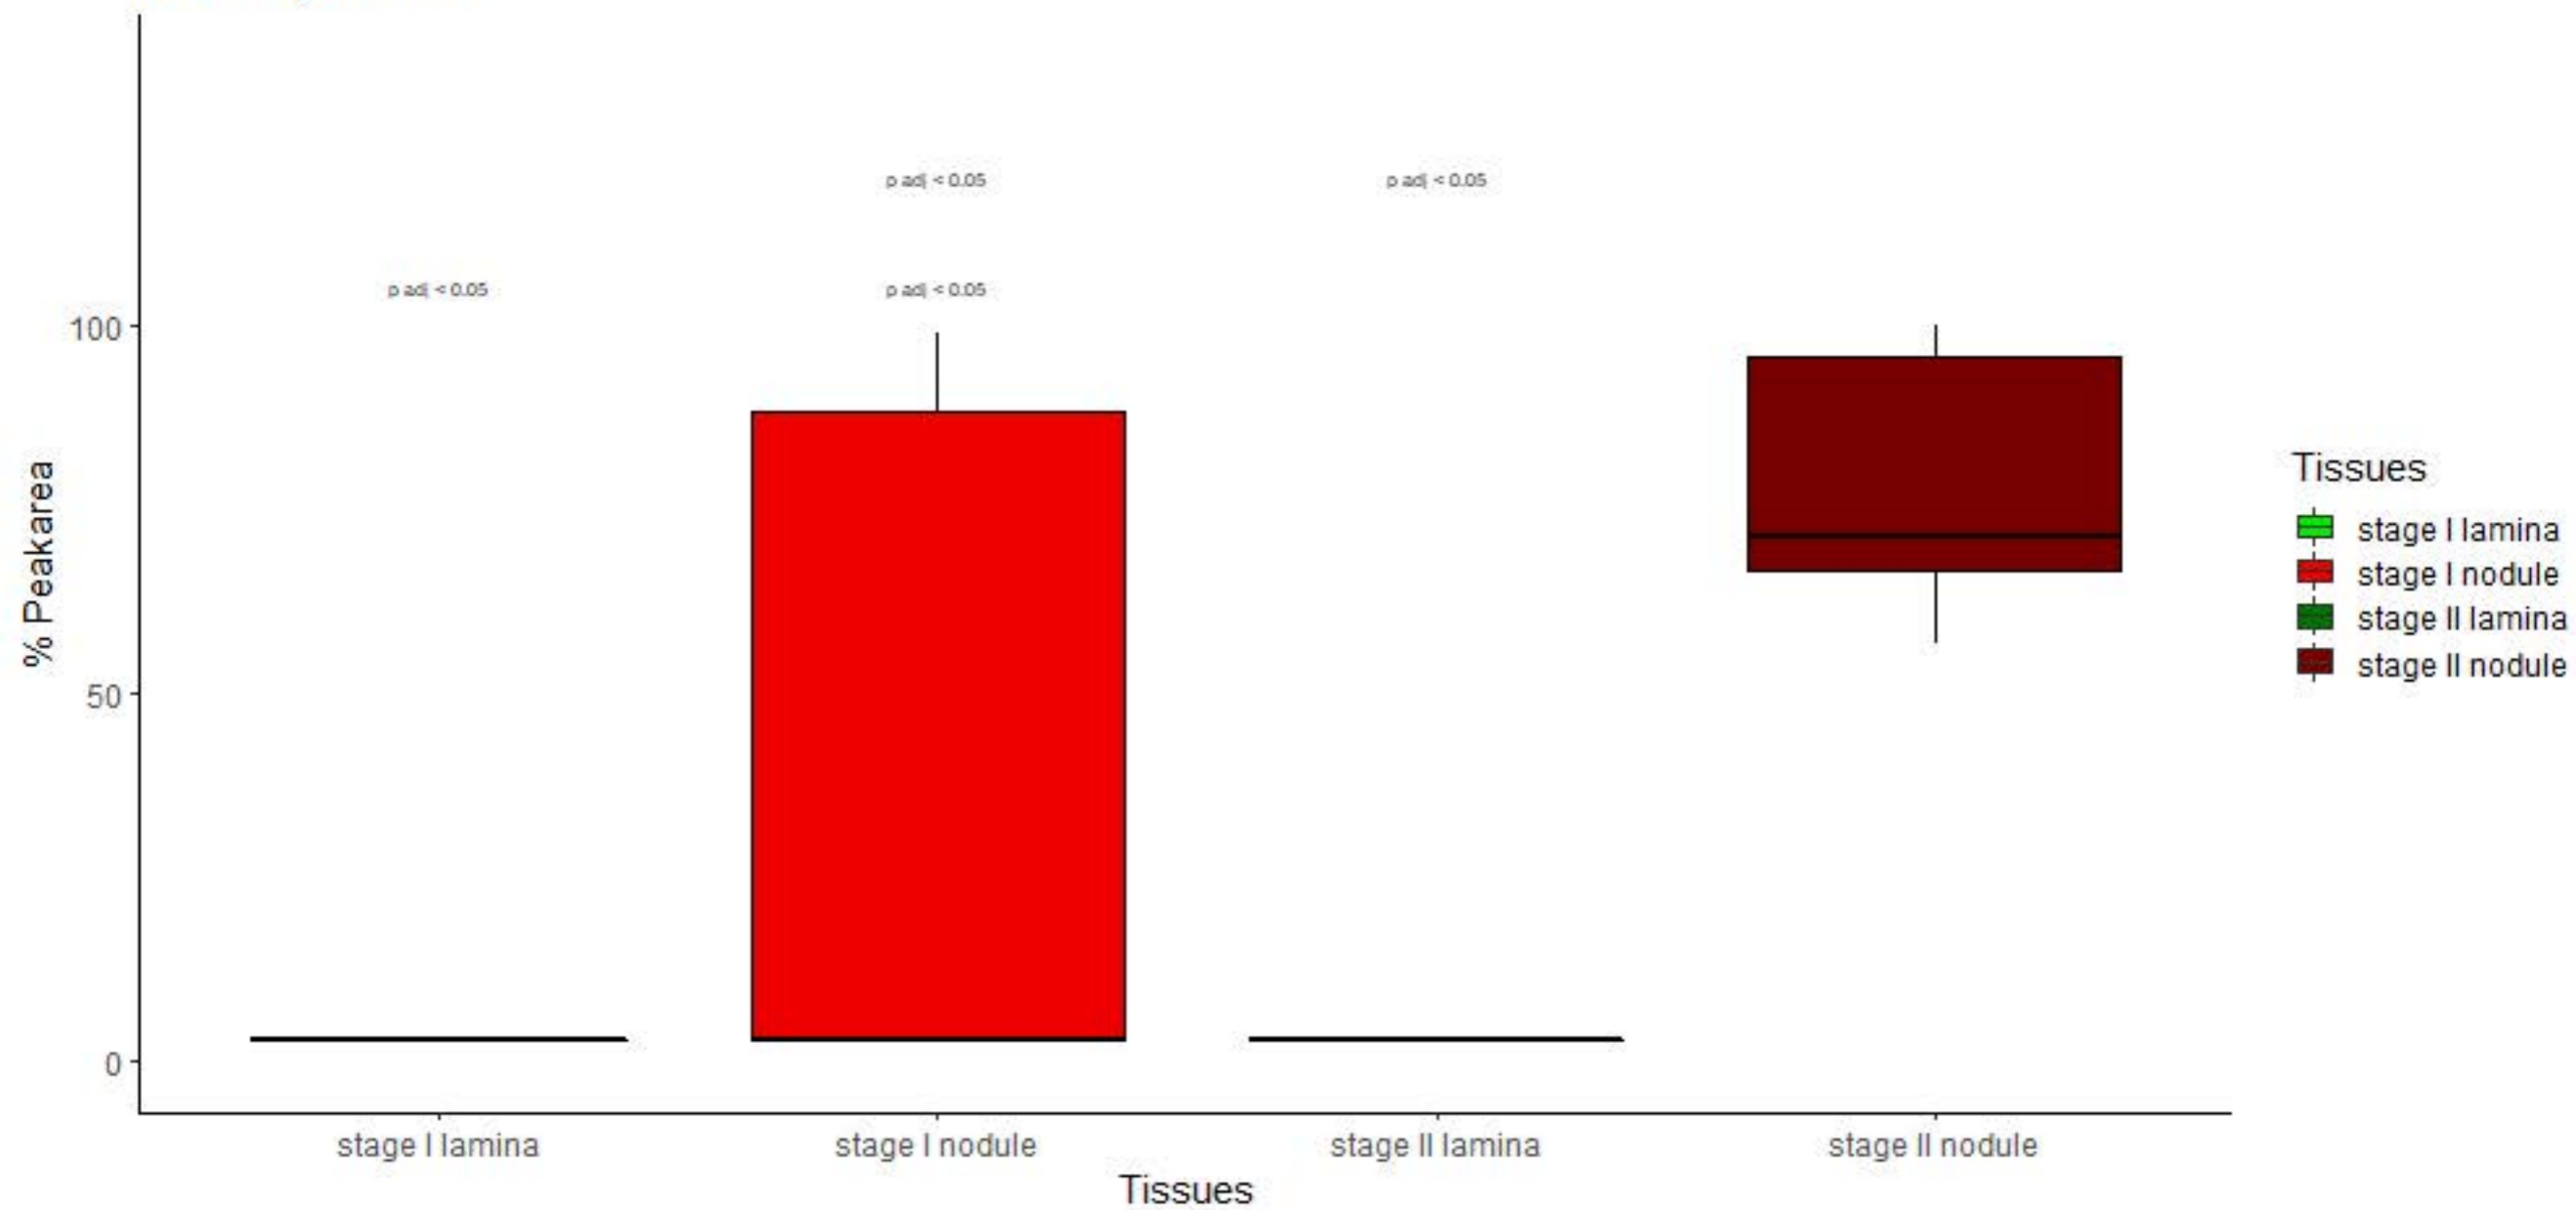

# Butanoic acid, 4-amino-

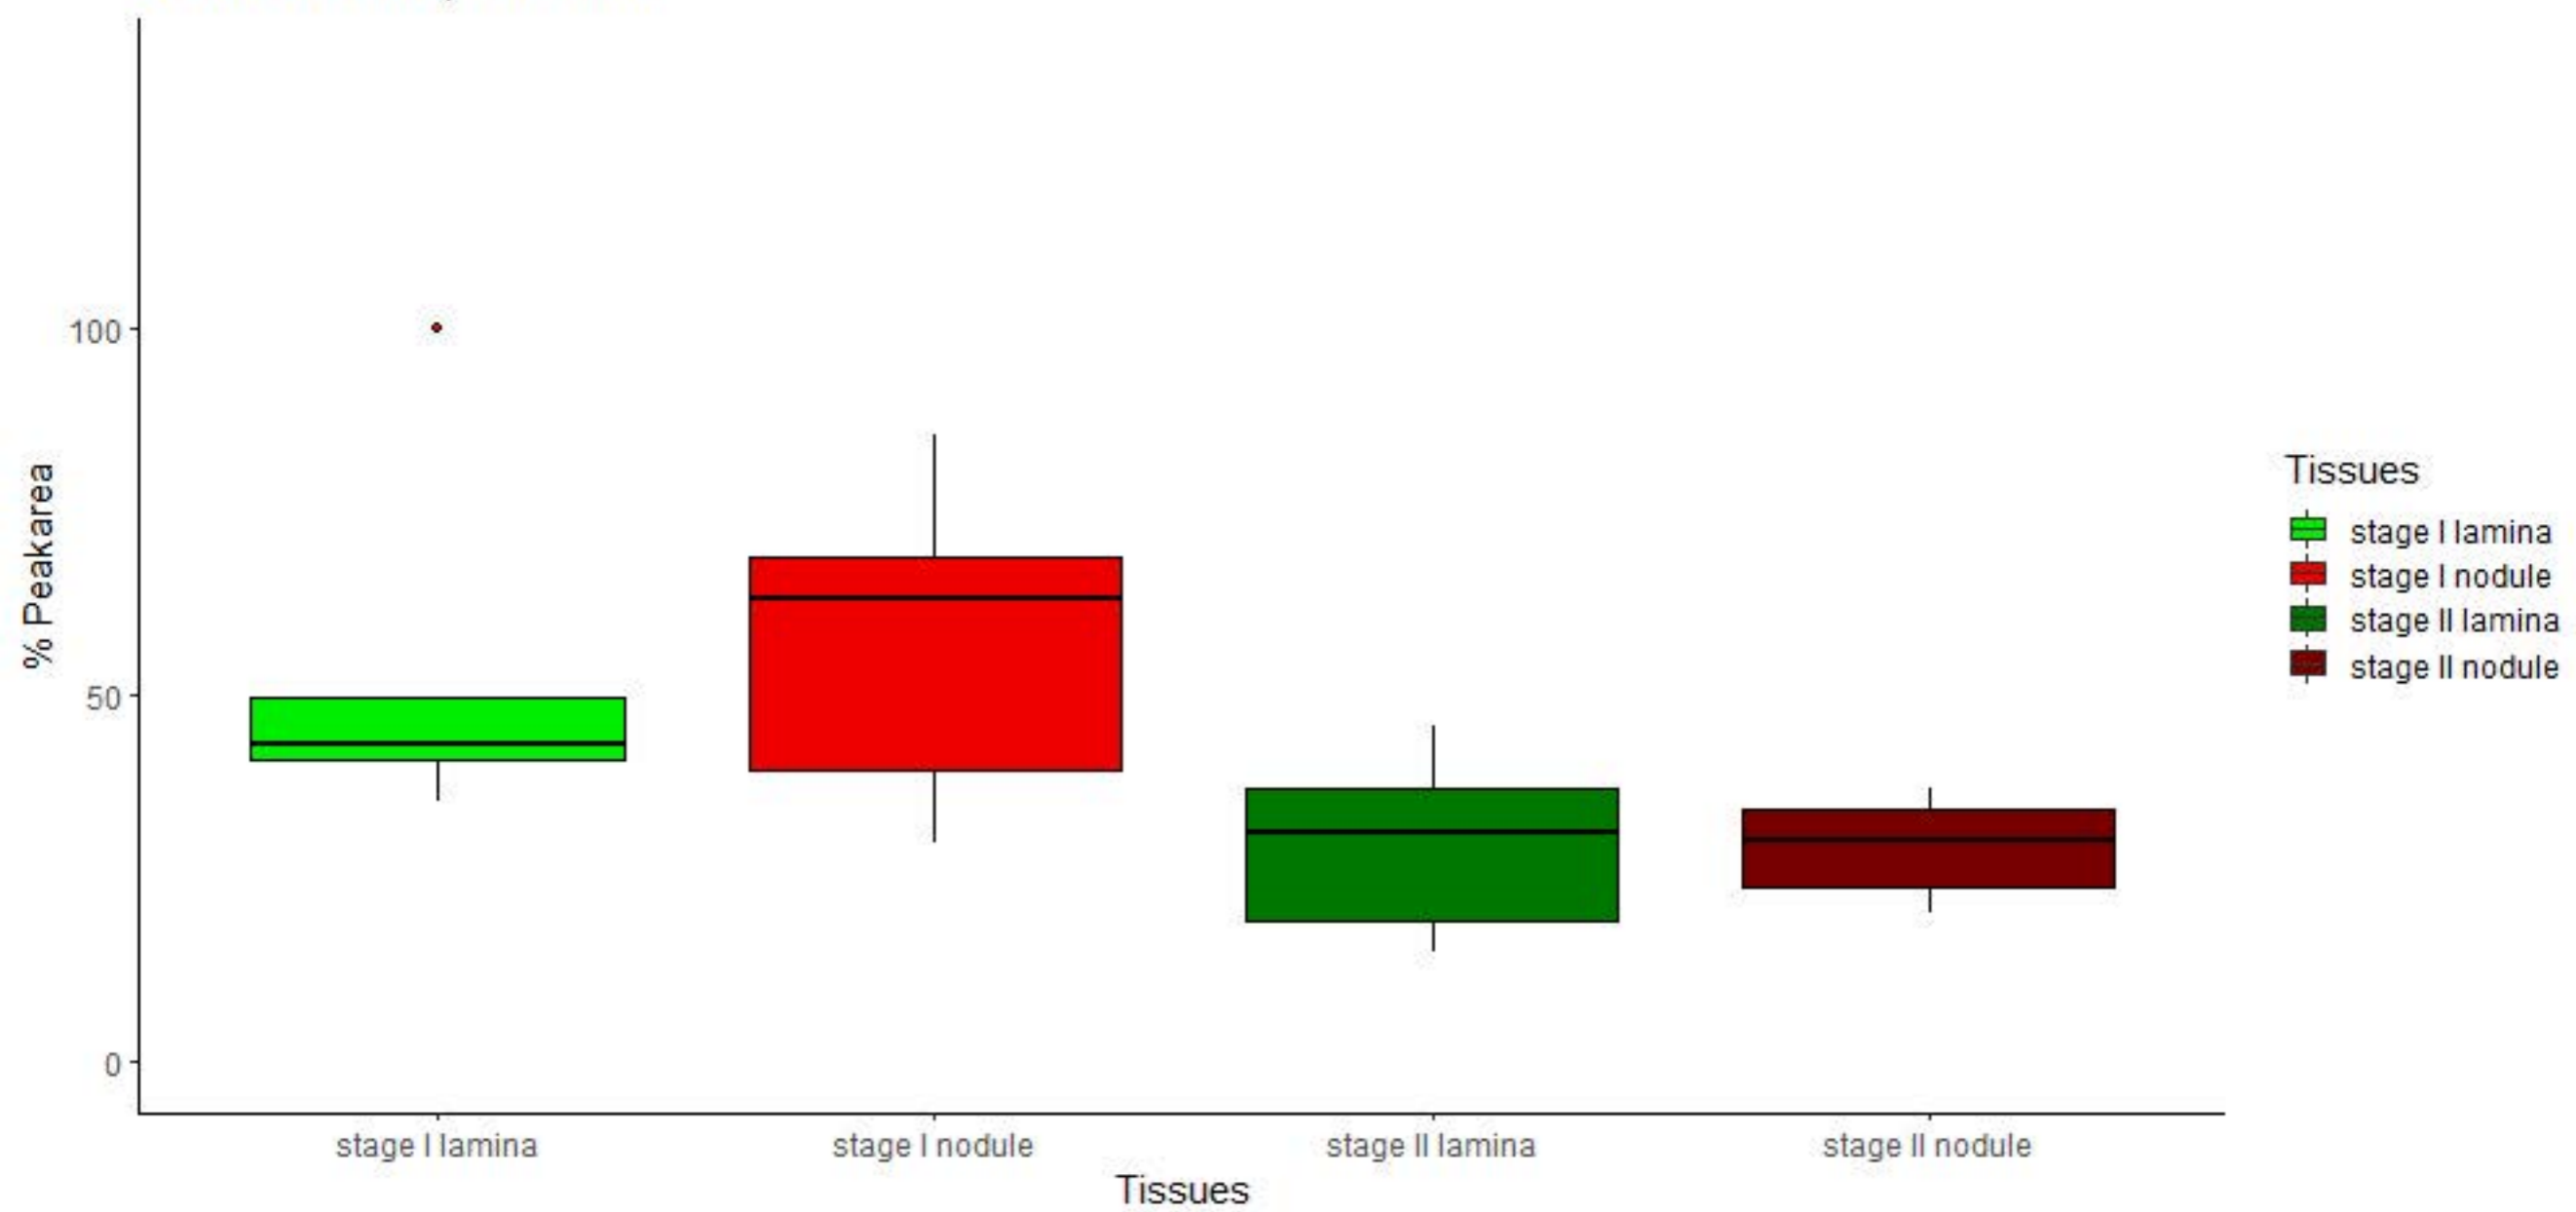

# Ethanolamine

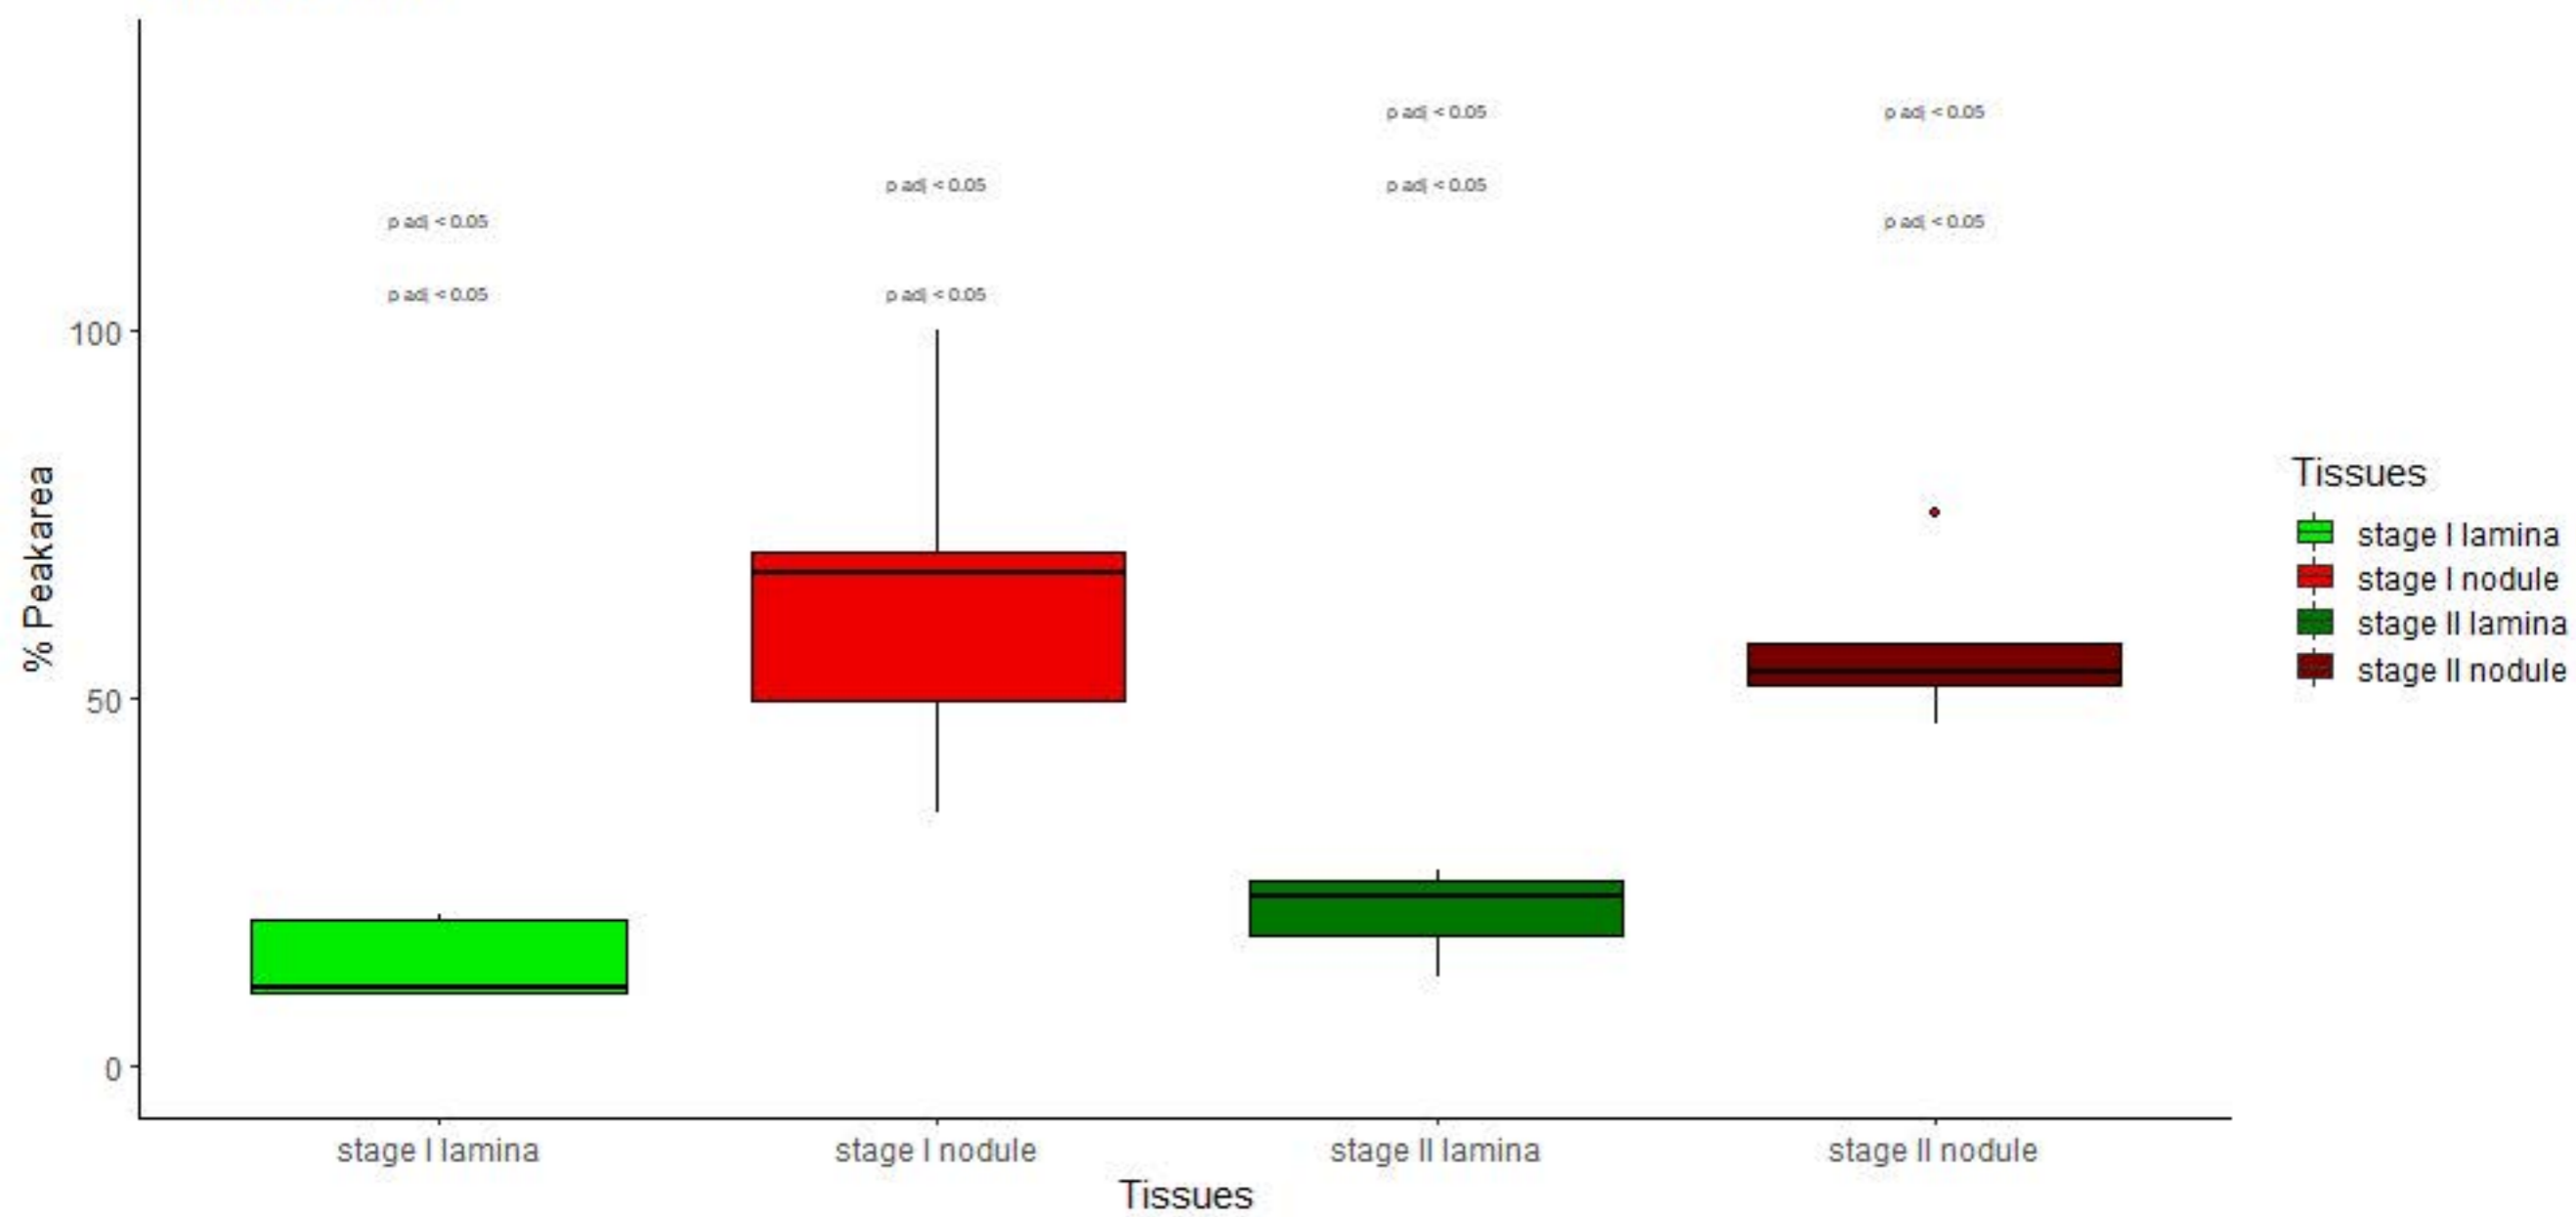

# ?Ethanaminephosphate

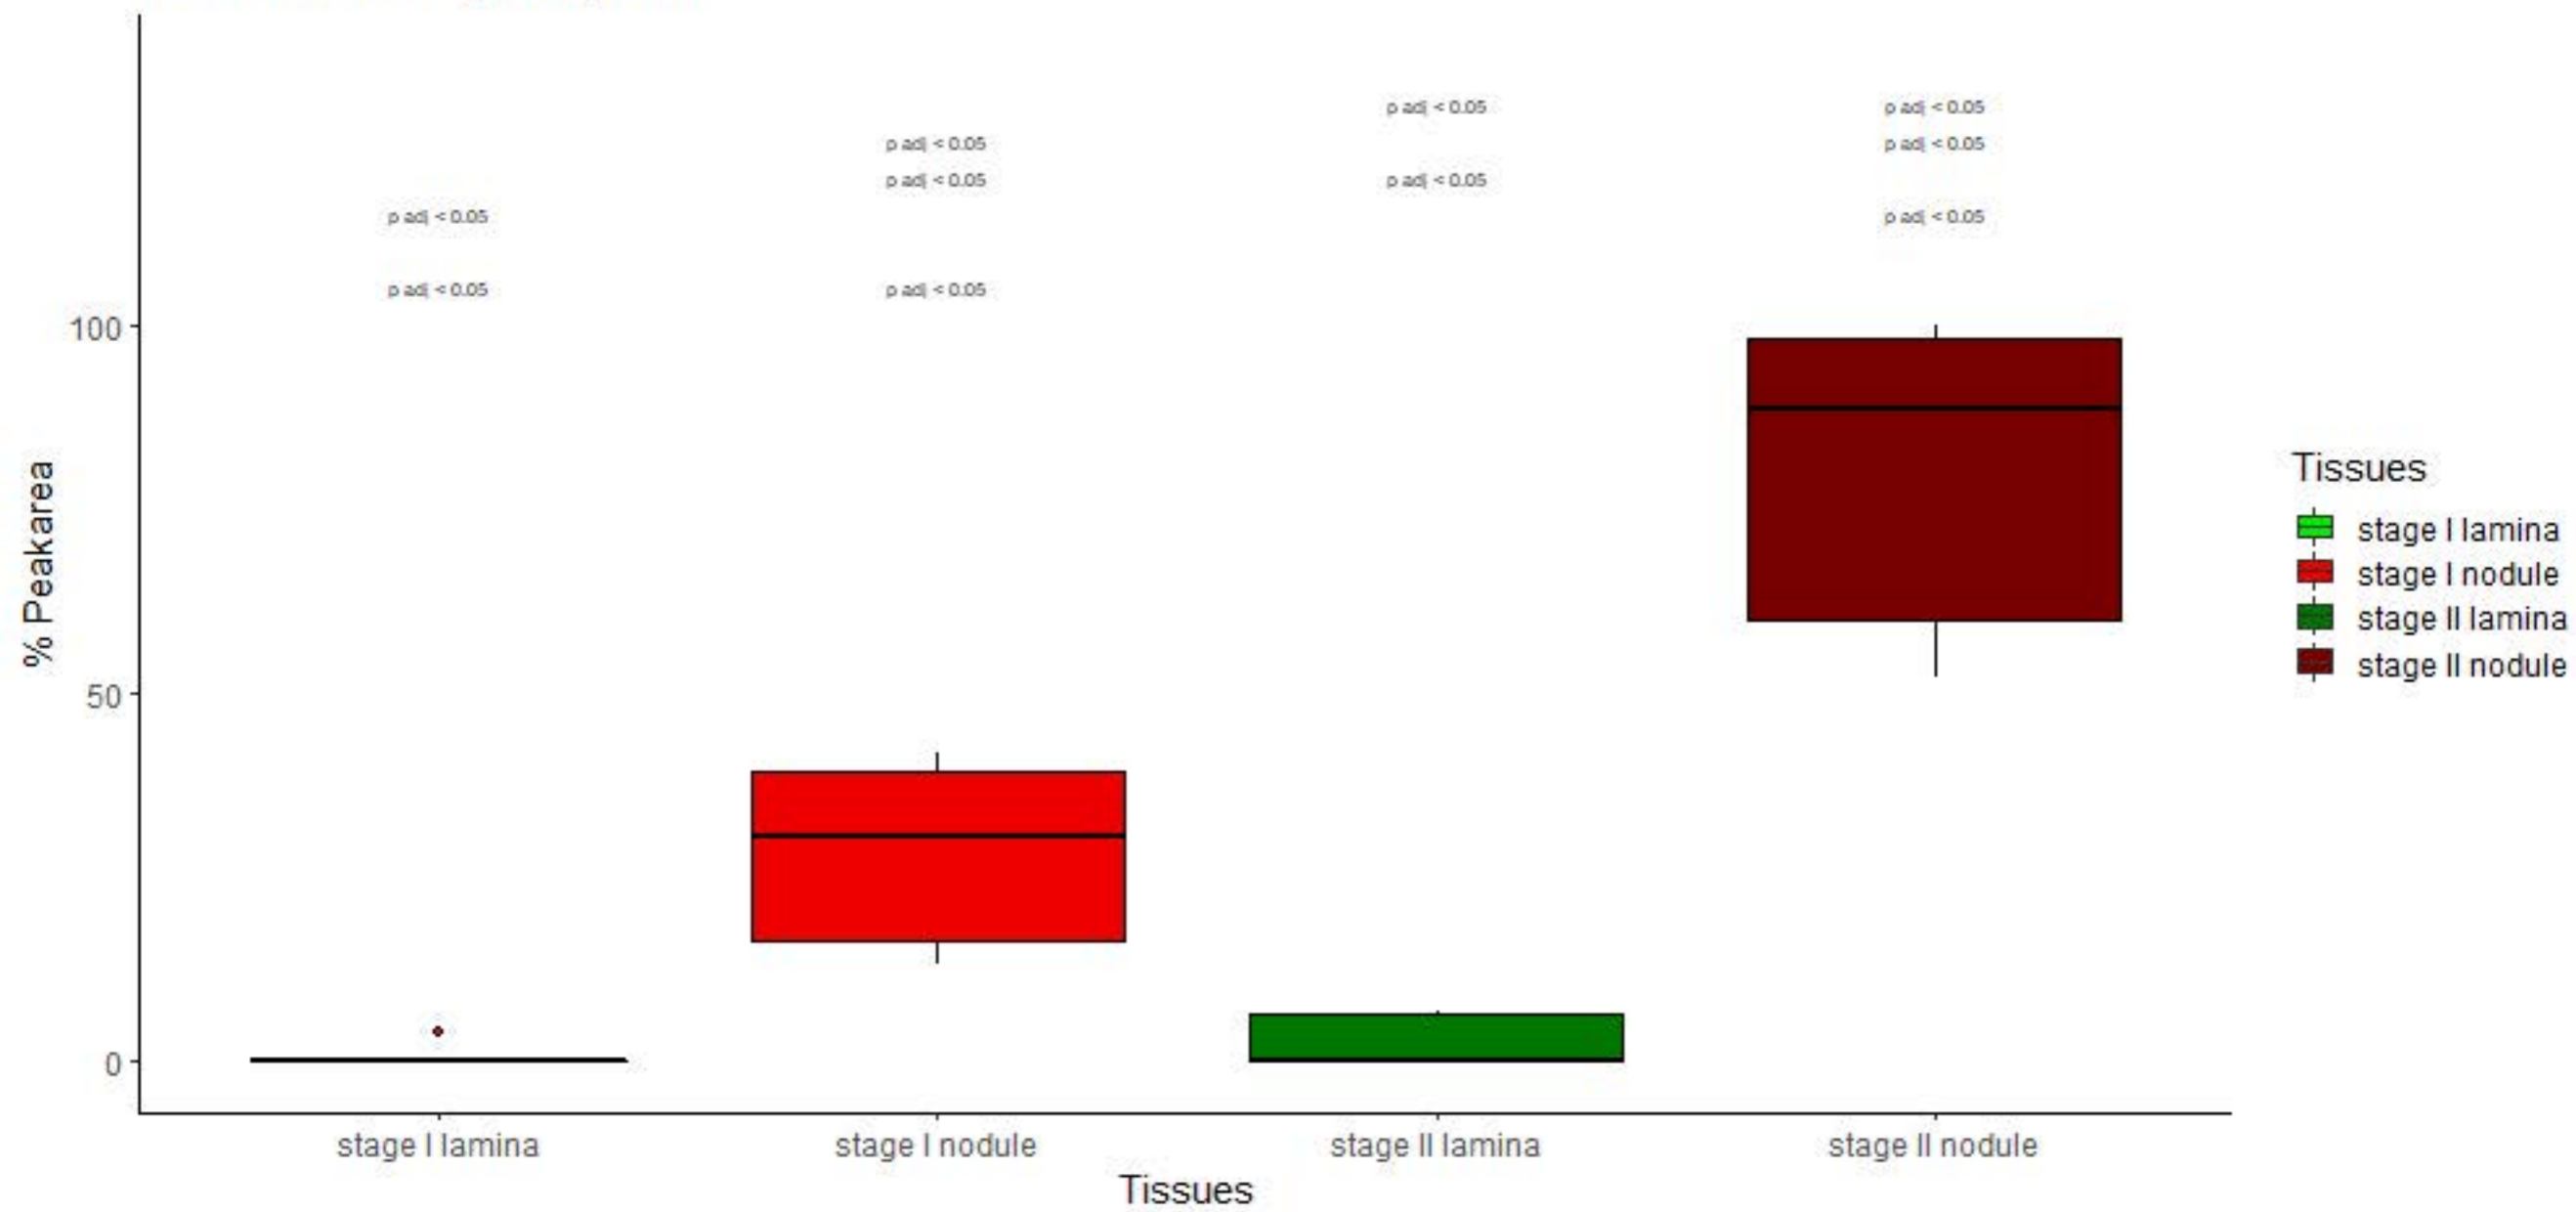

# Putrescine

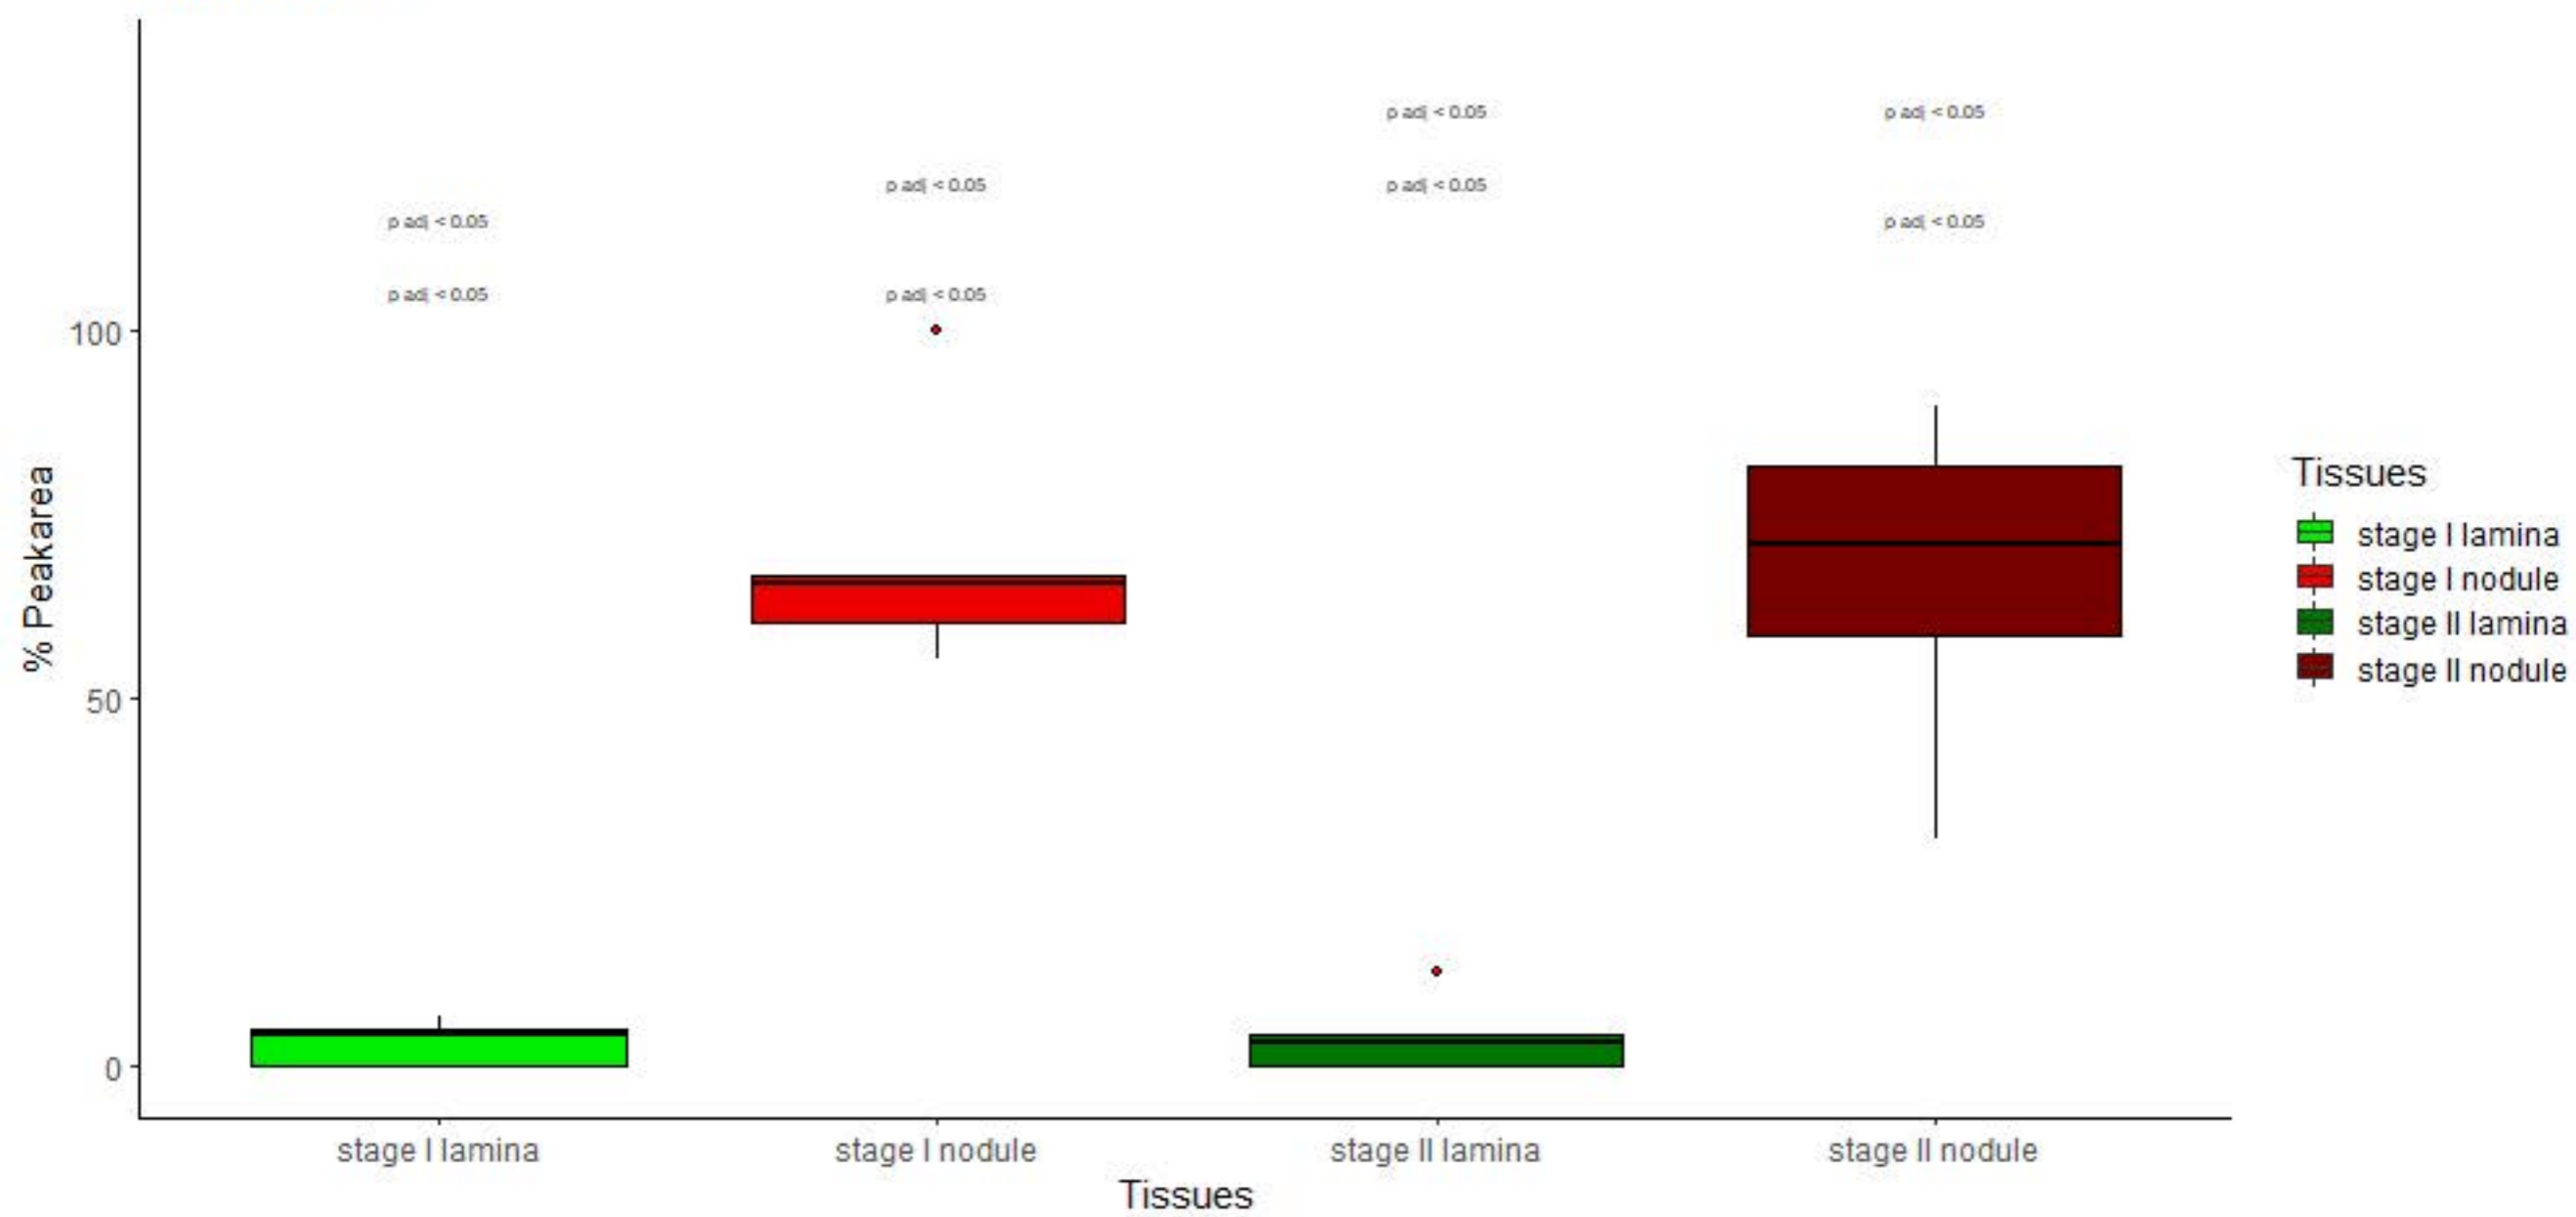

# Quinic acid

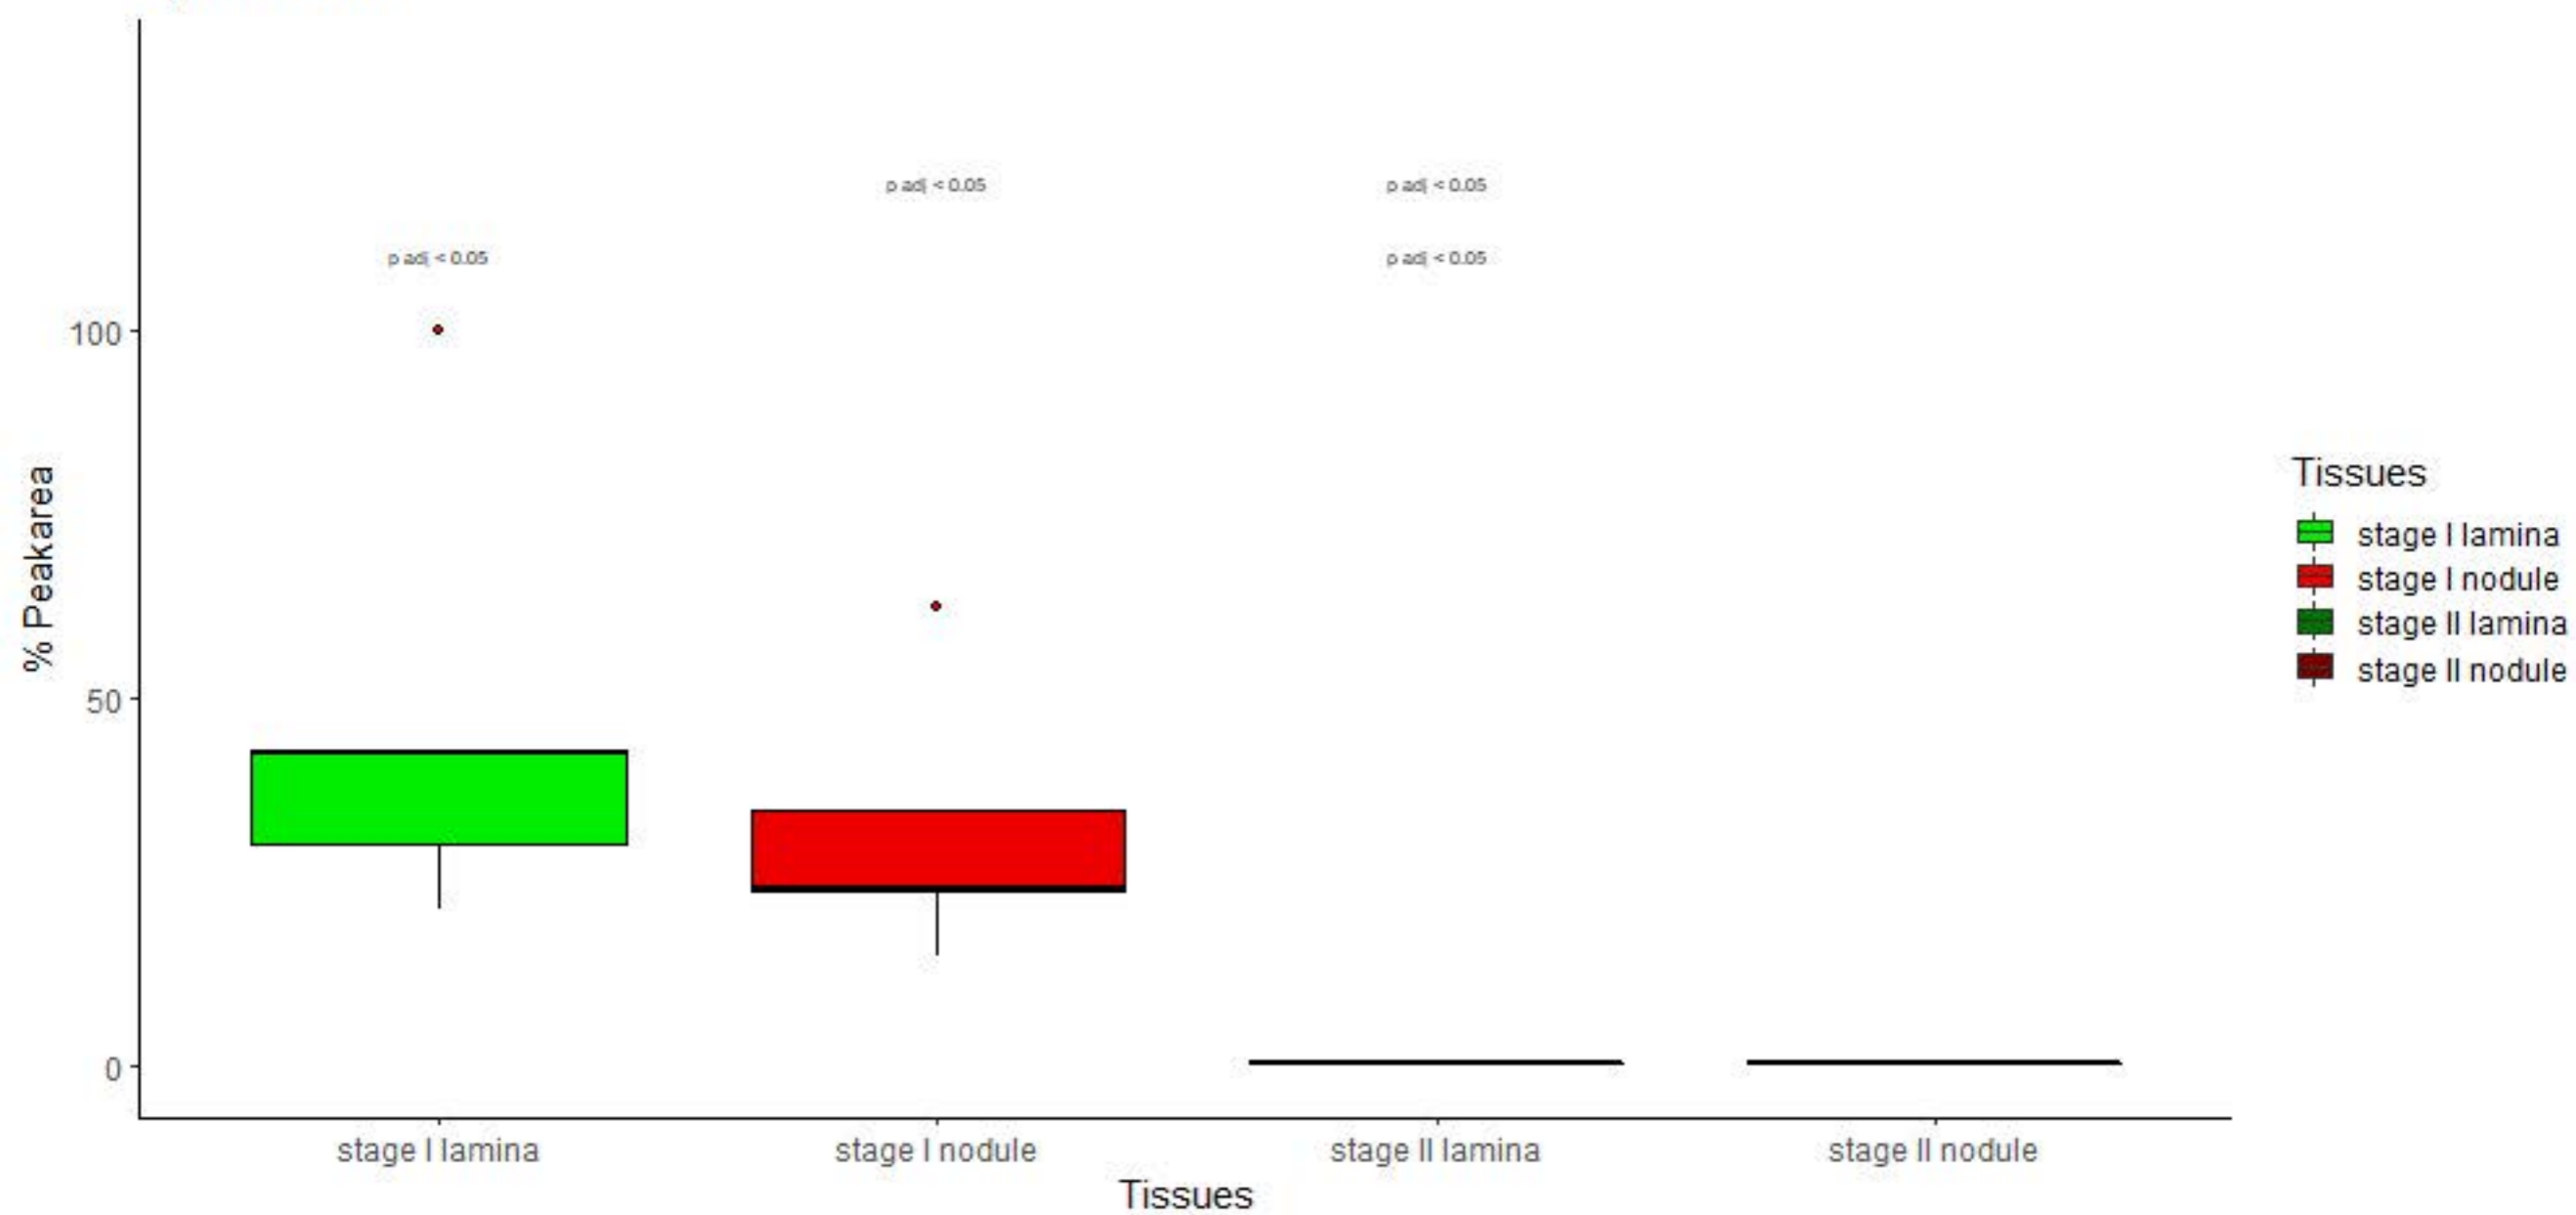

# Shikimic acid

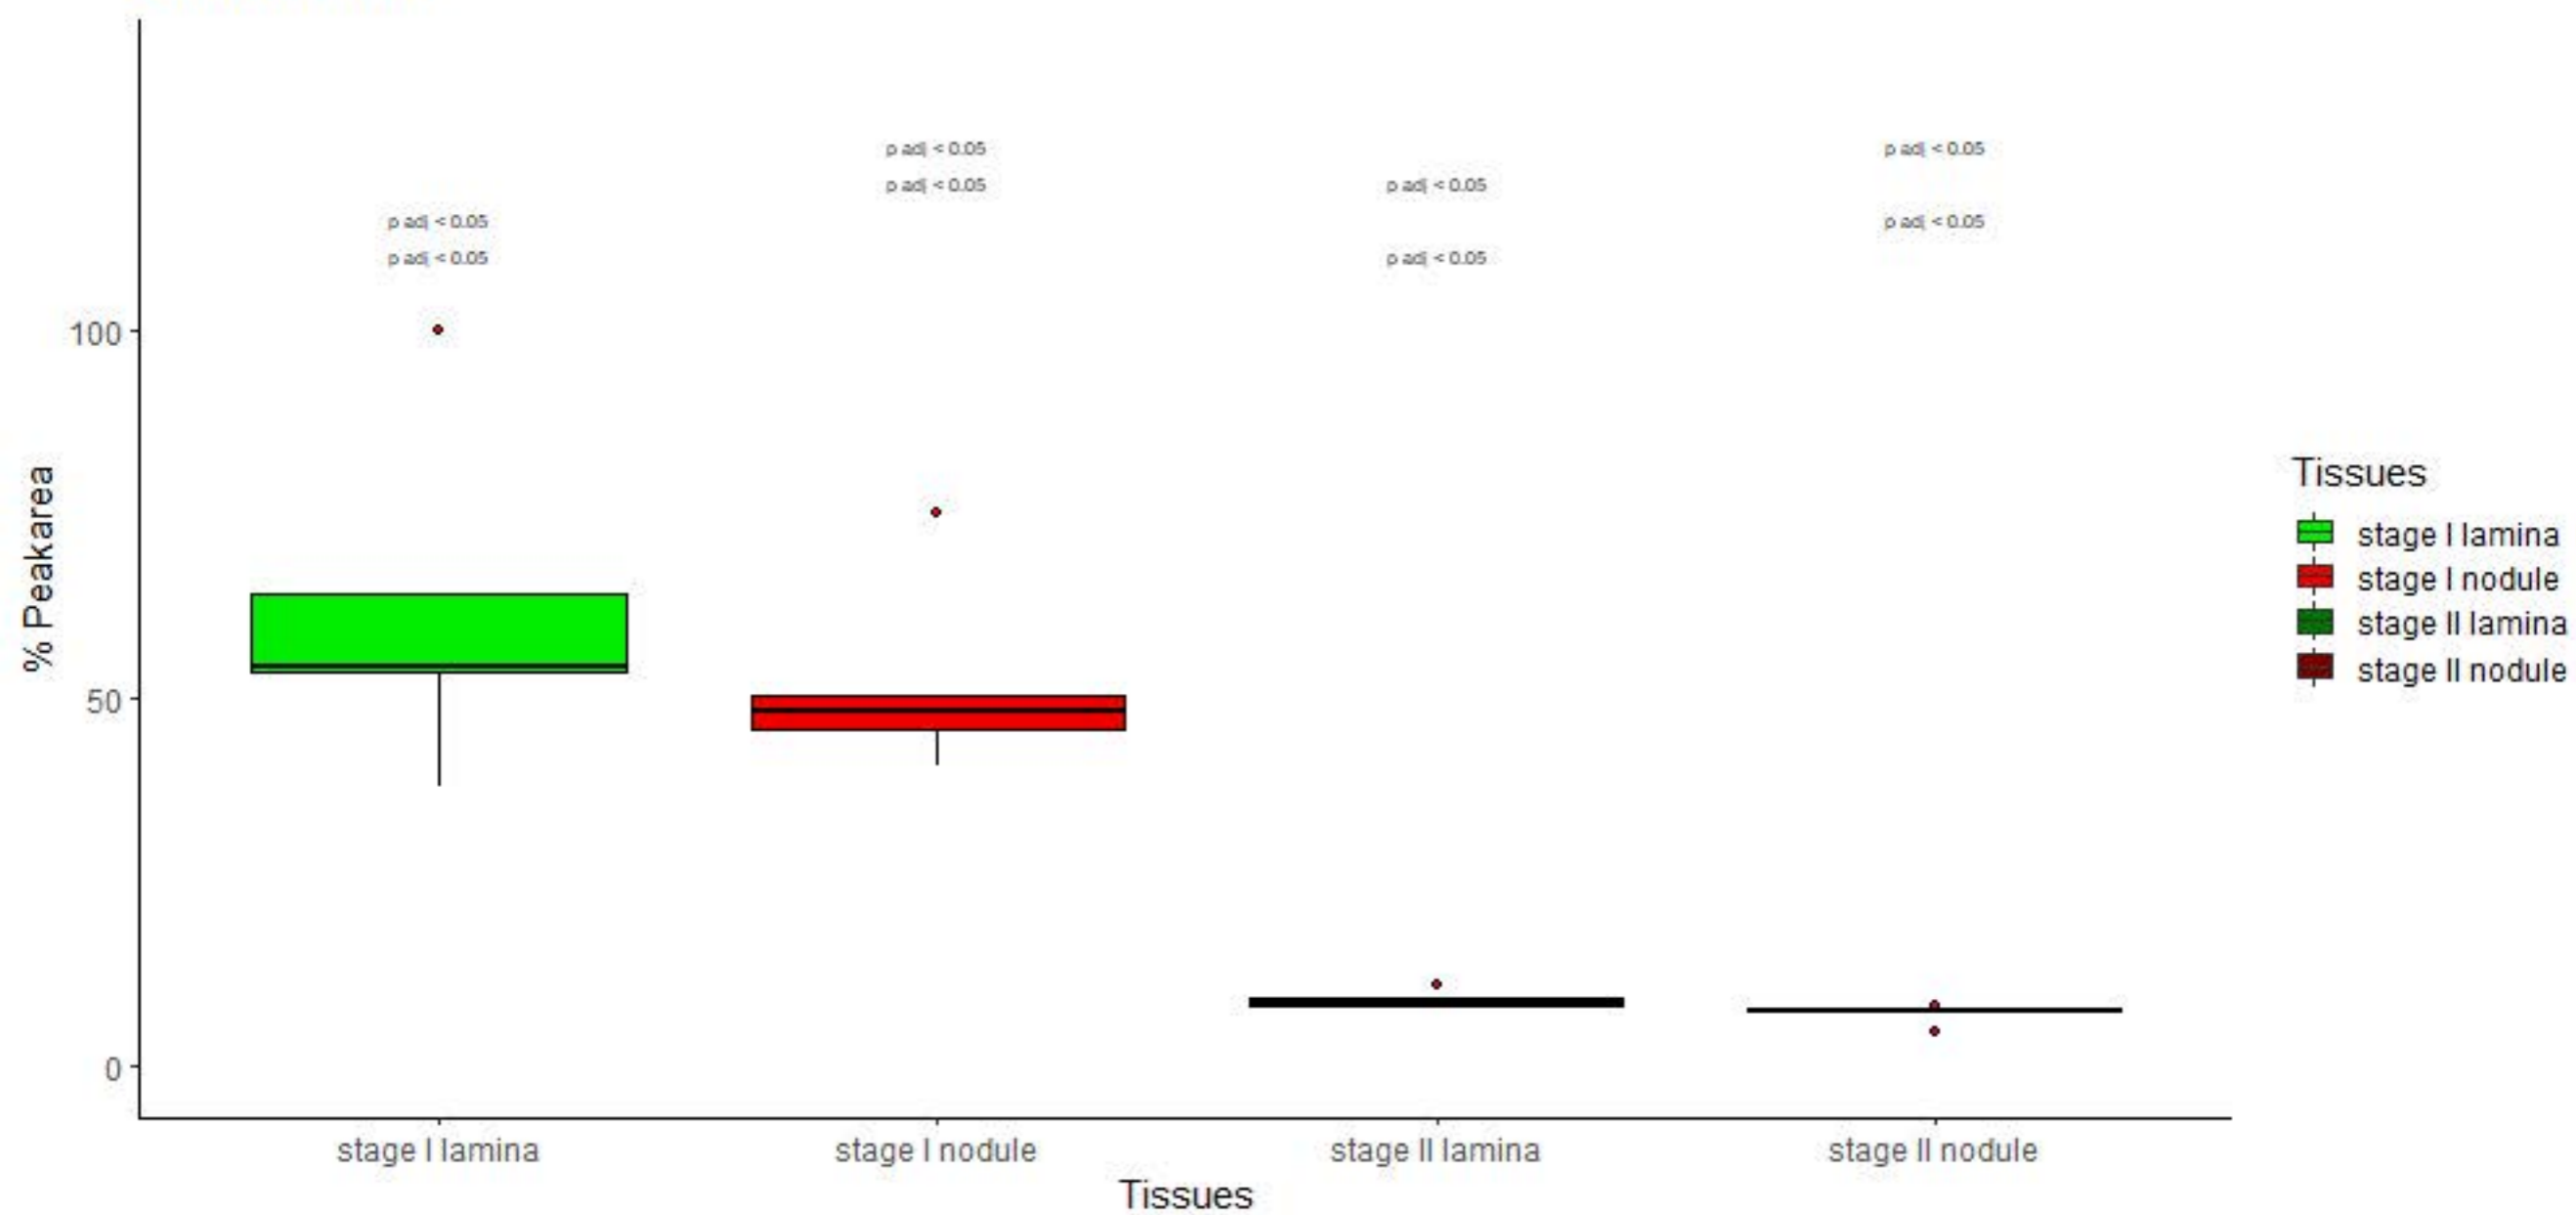

# 3-trans-Caffeoylquinic acid

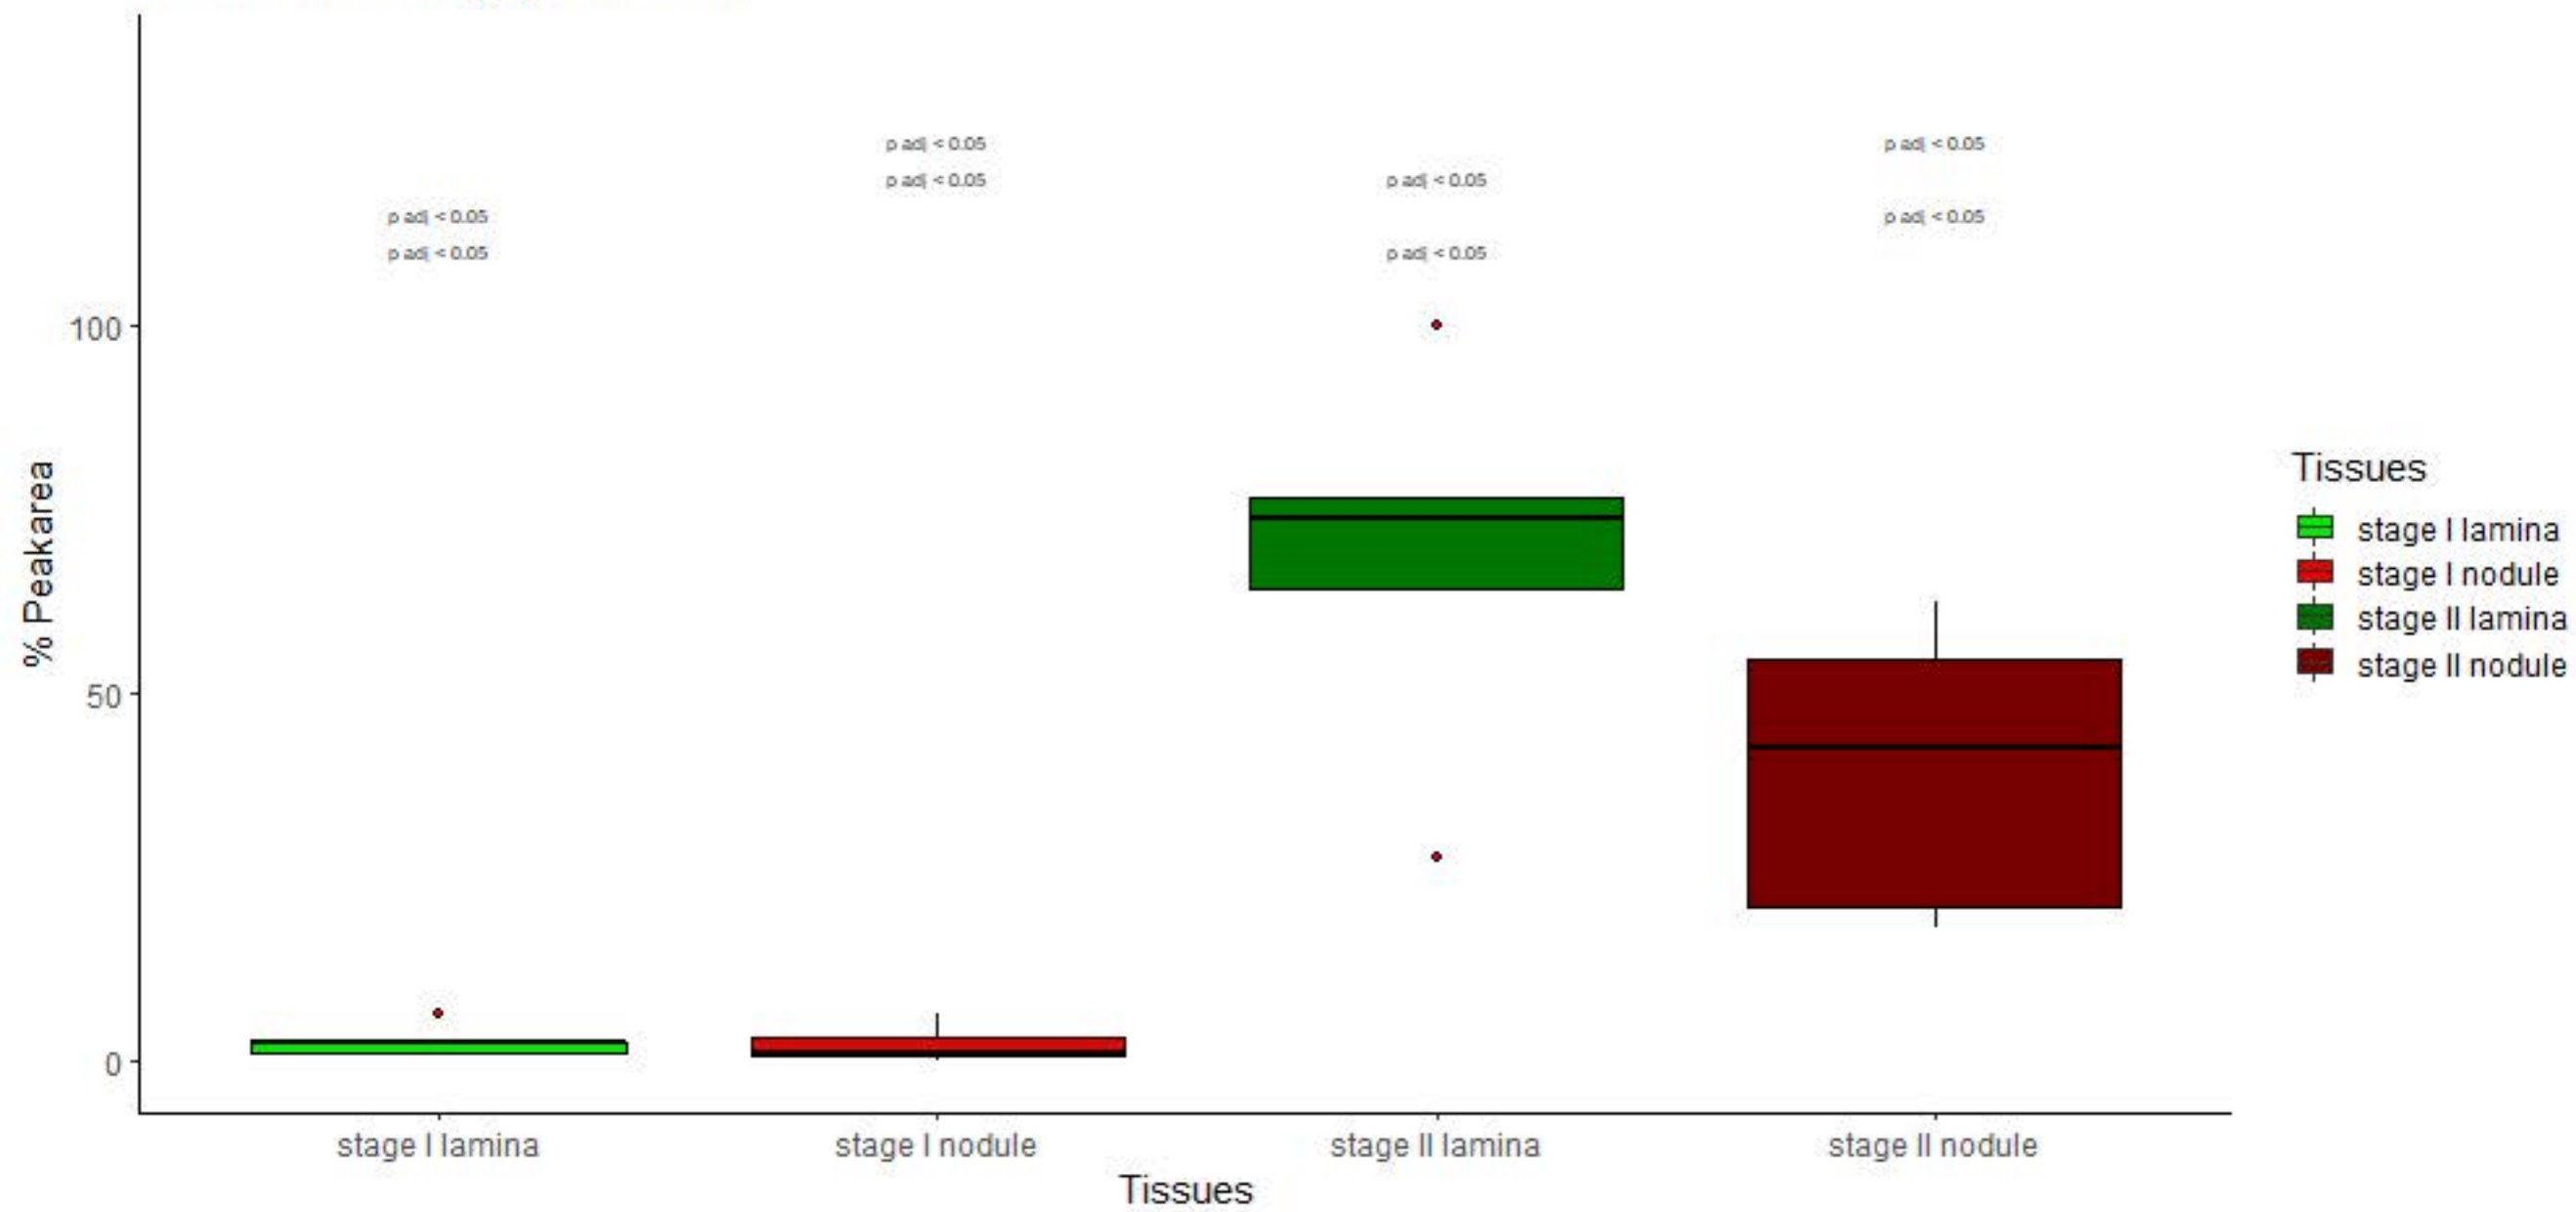



# Quinic acid, 4-caffeoyl-, trans-

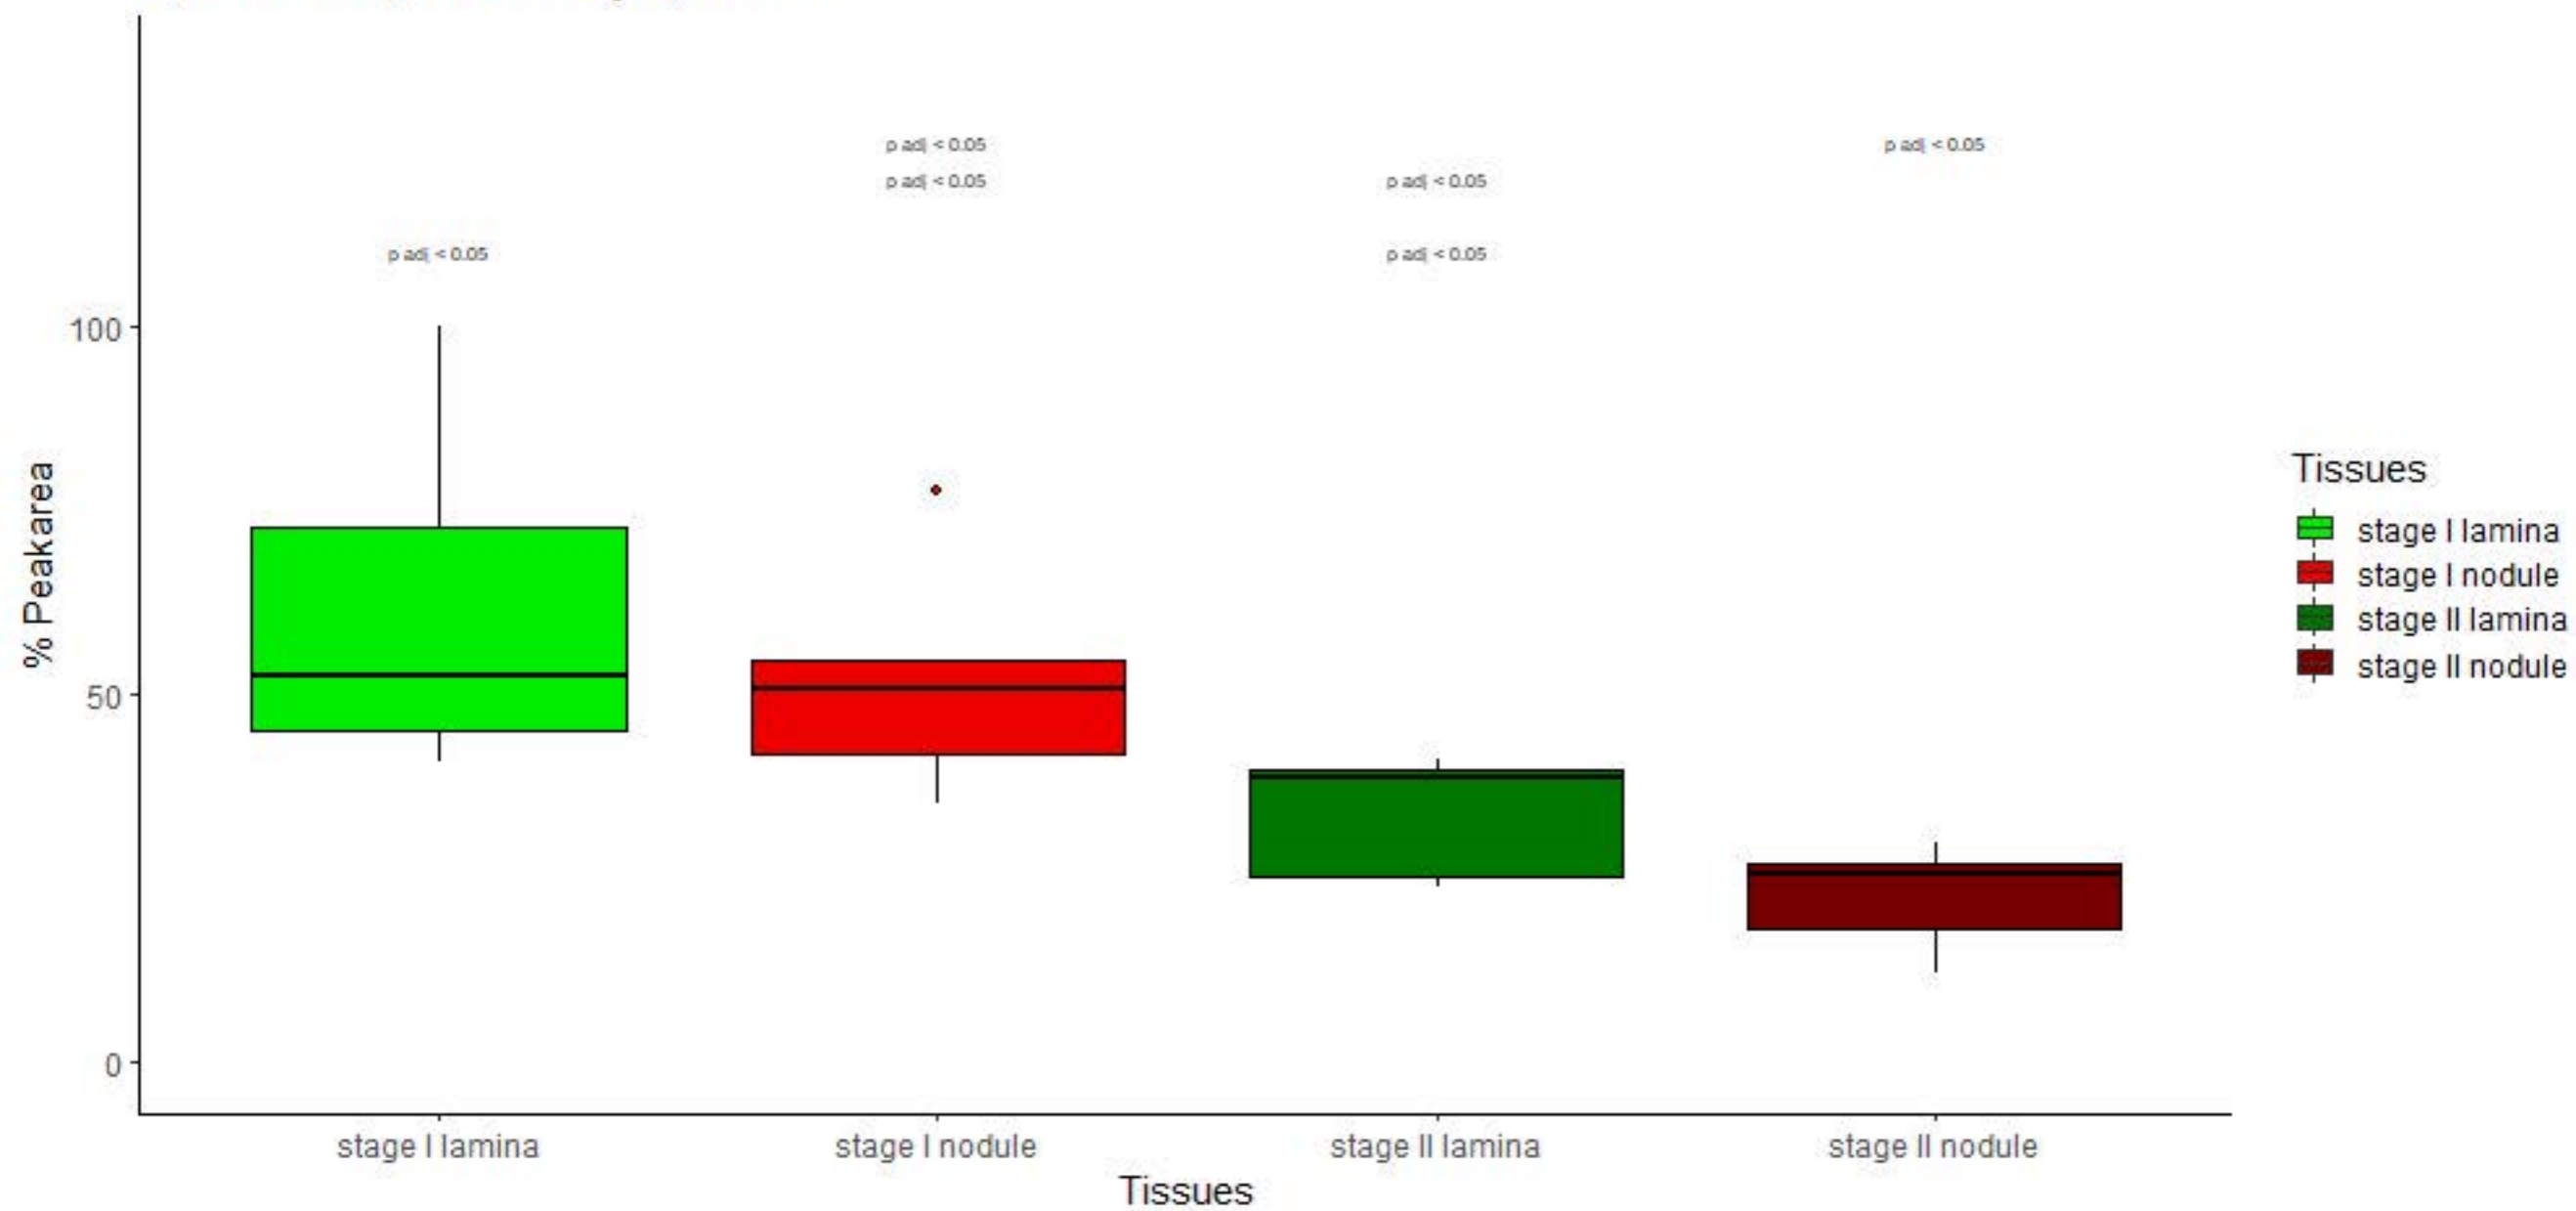

# Quinic acid, 5-caffeoyl-, trans-

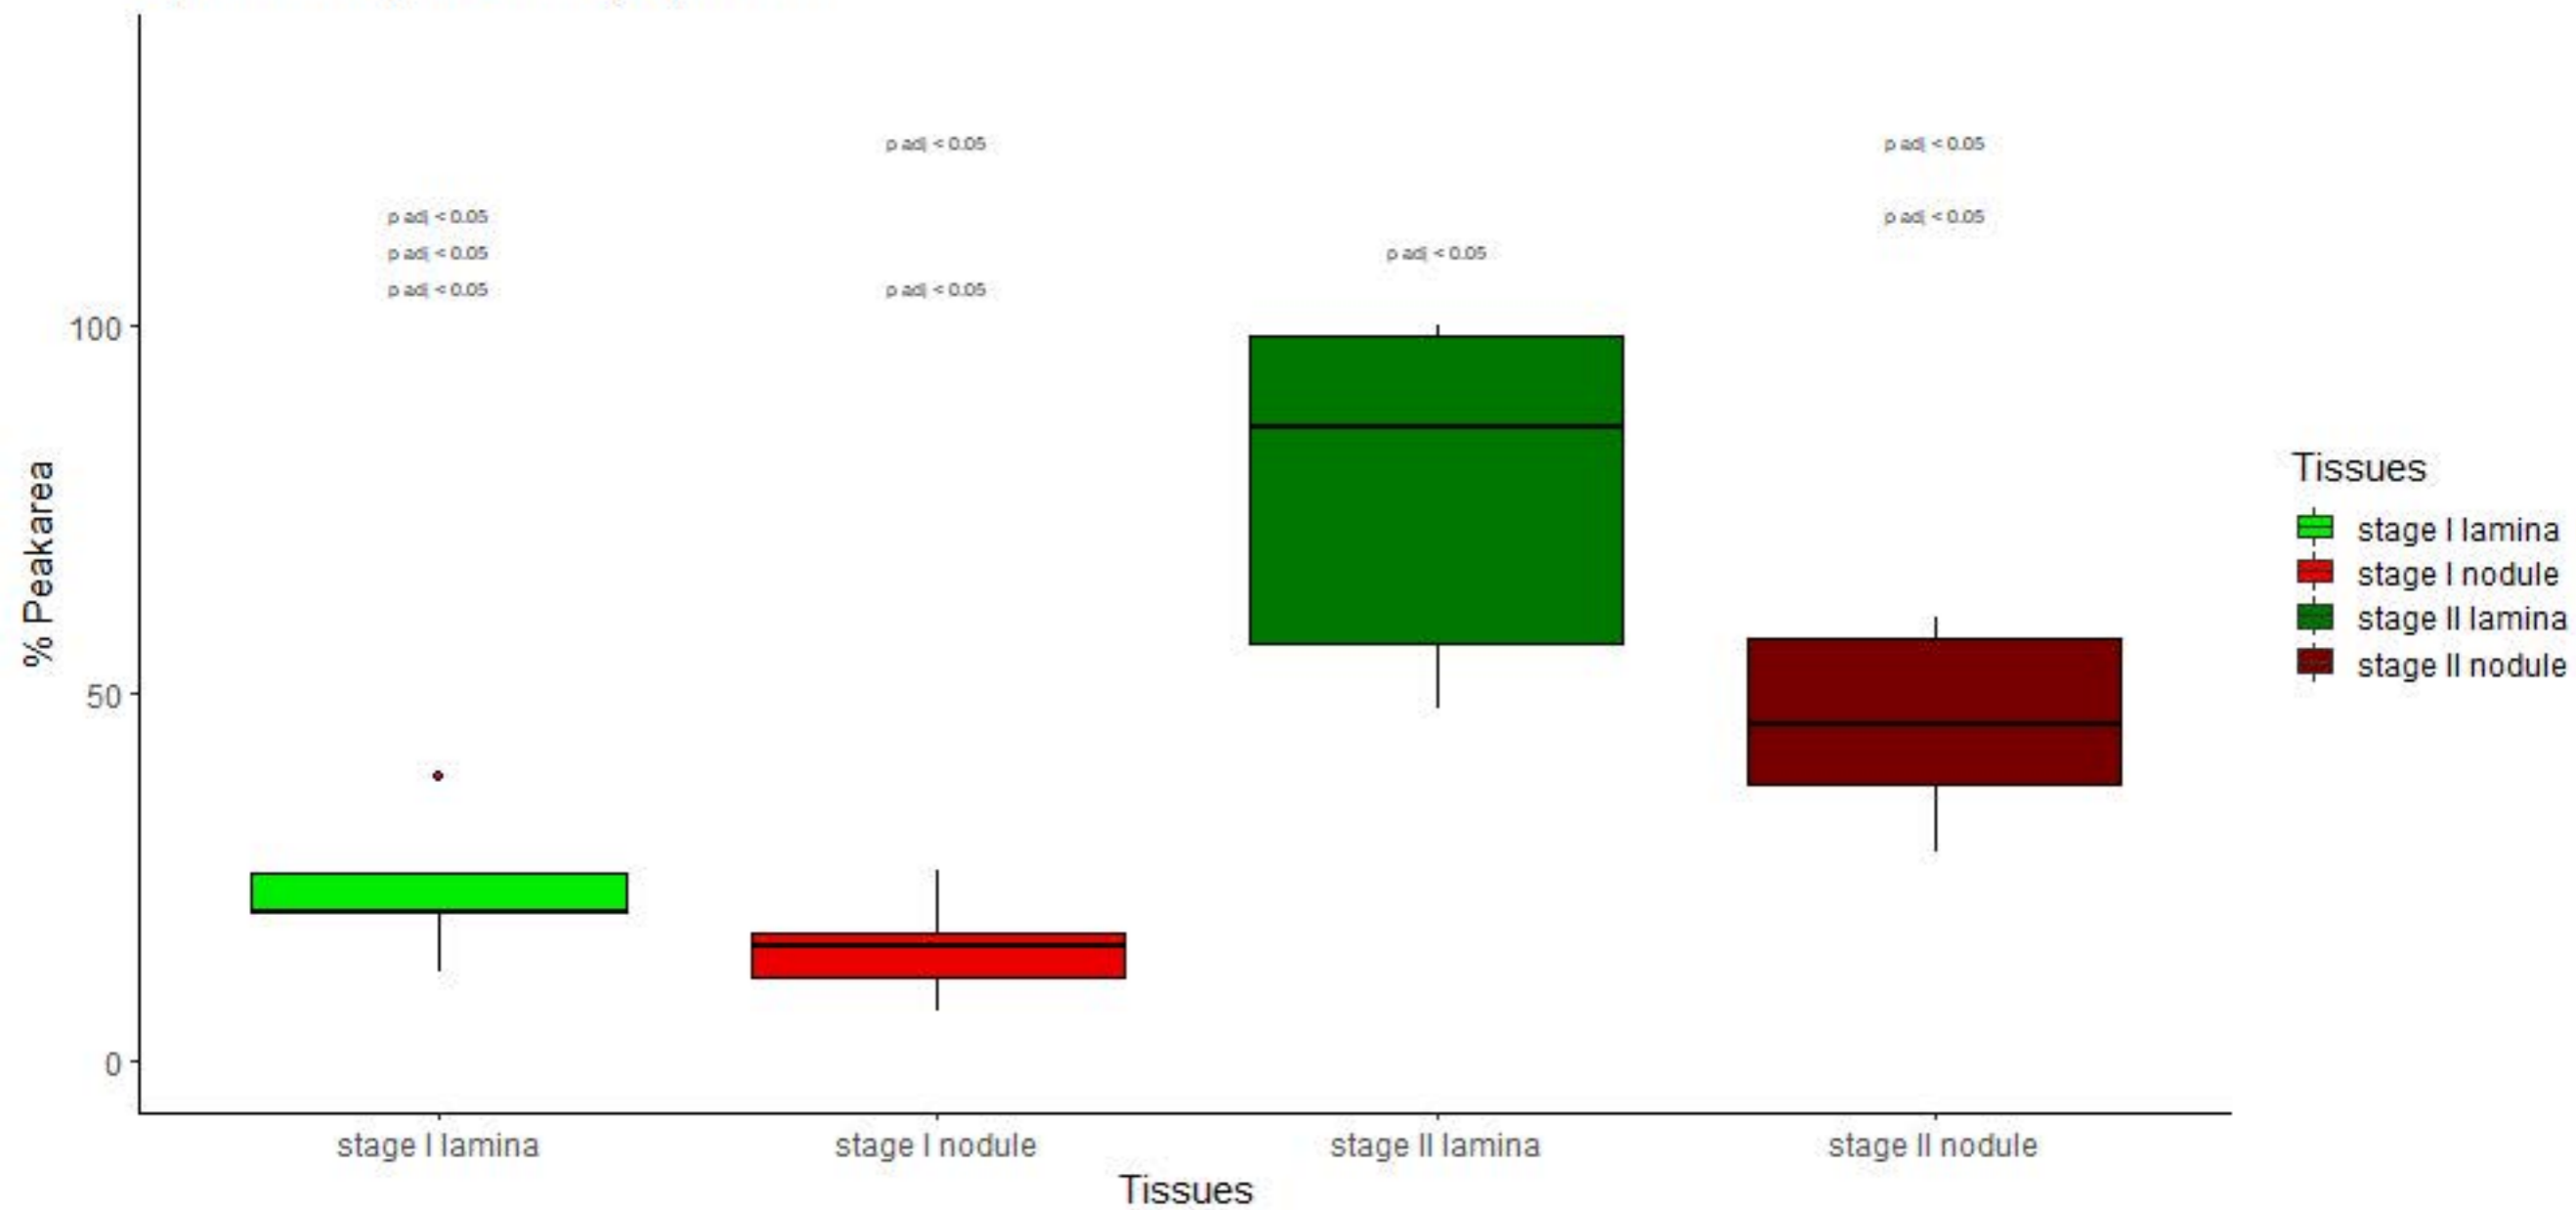

# Tetradecanoic acid

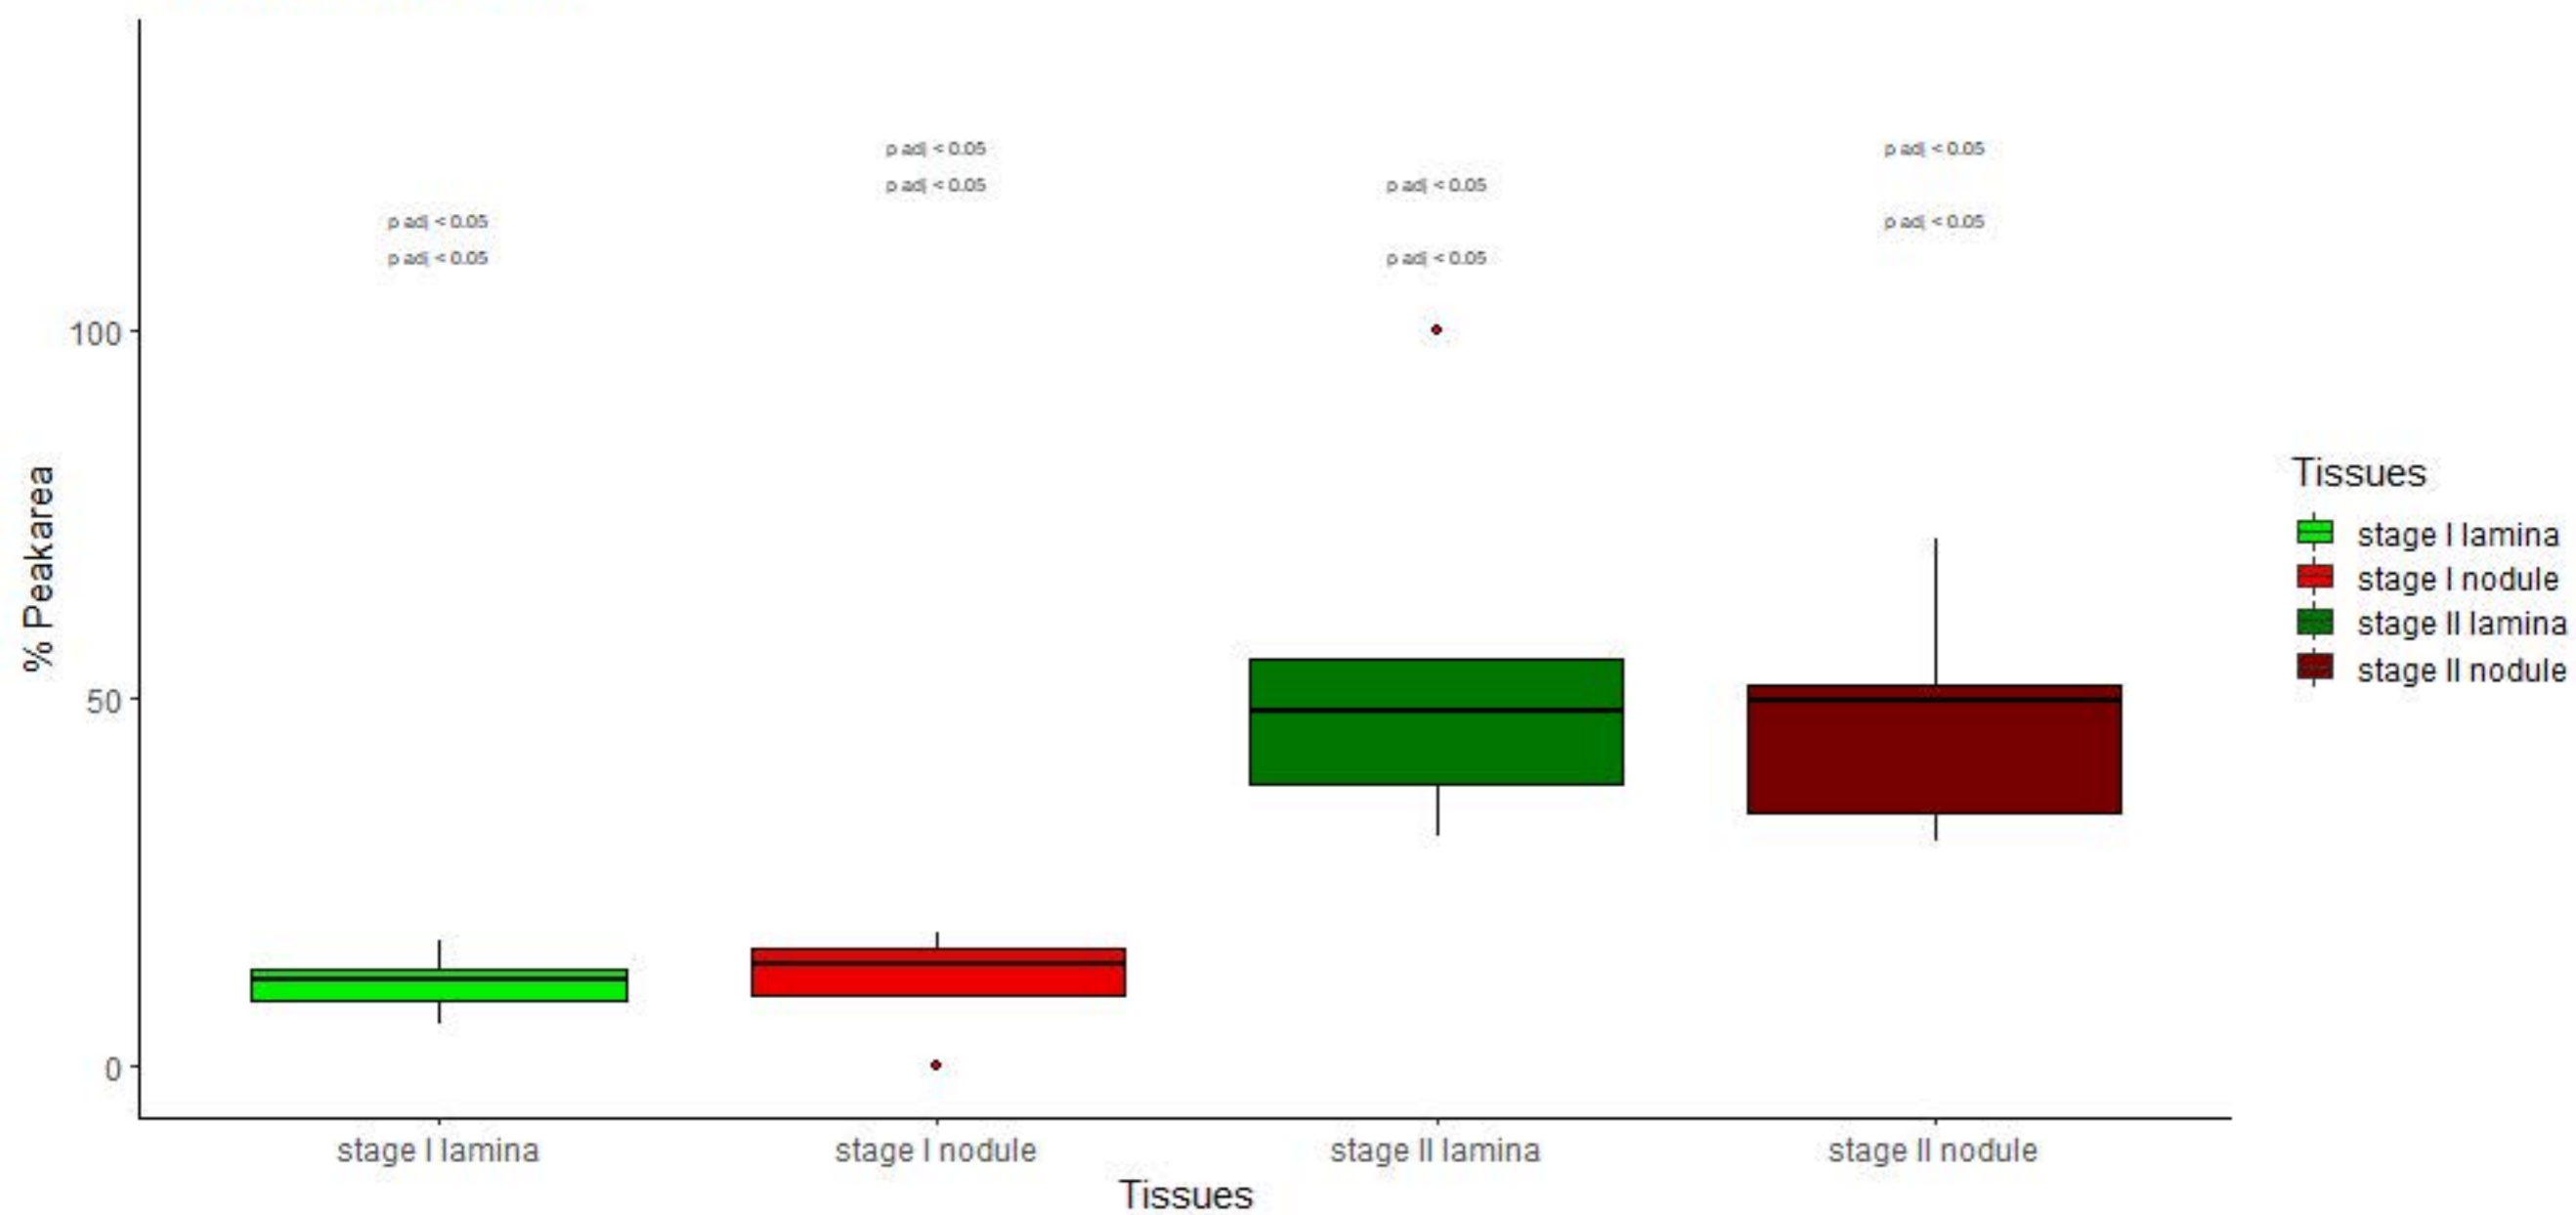

# Stigmasterol

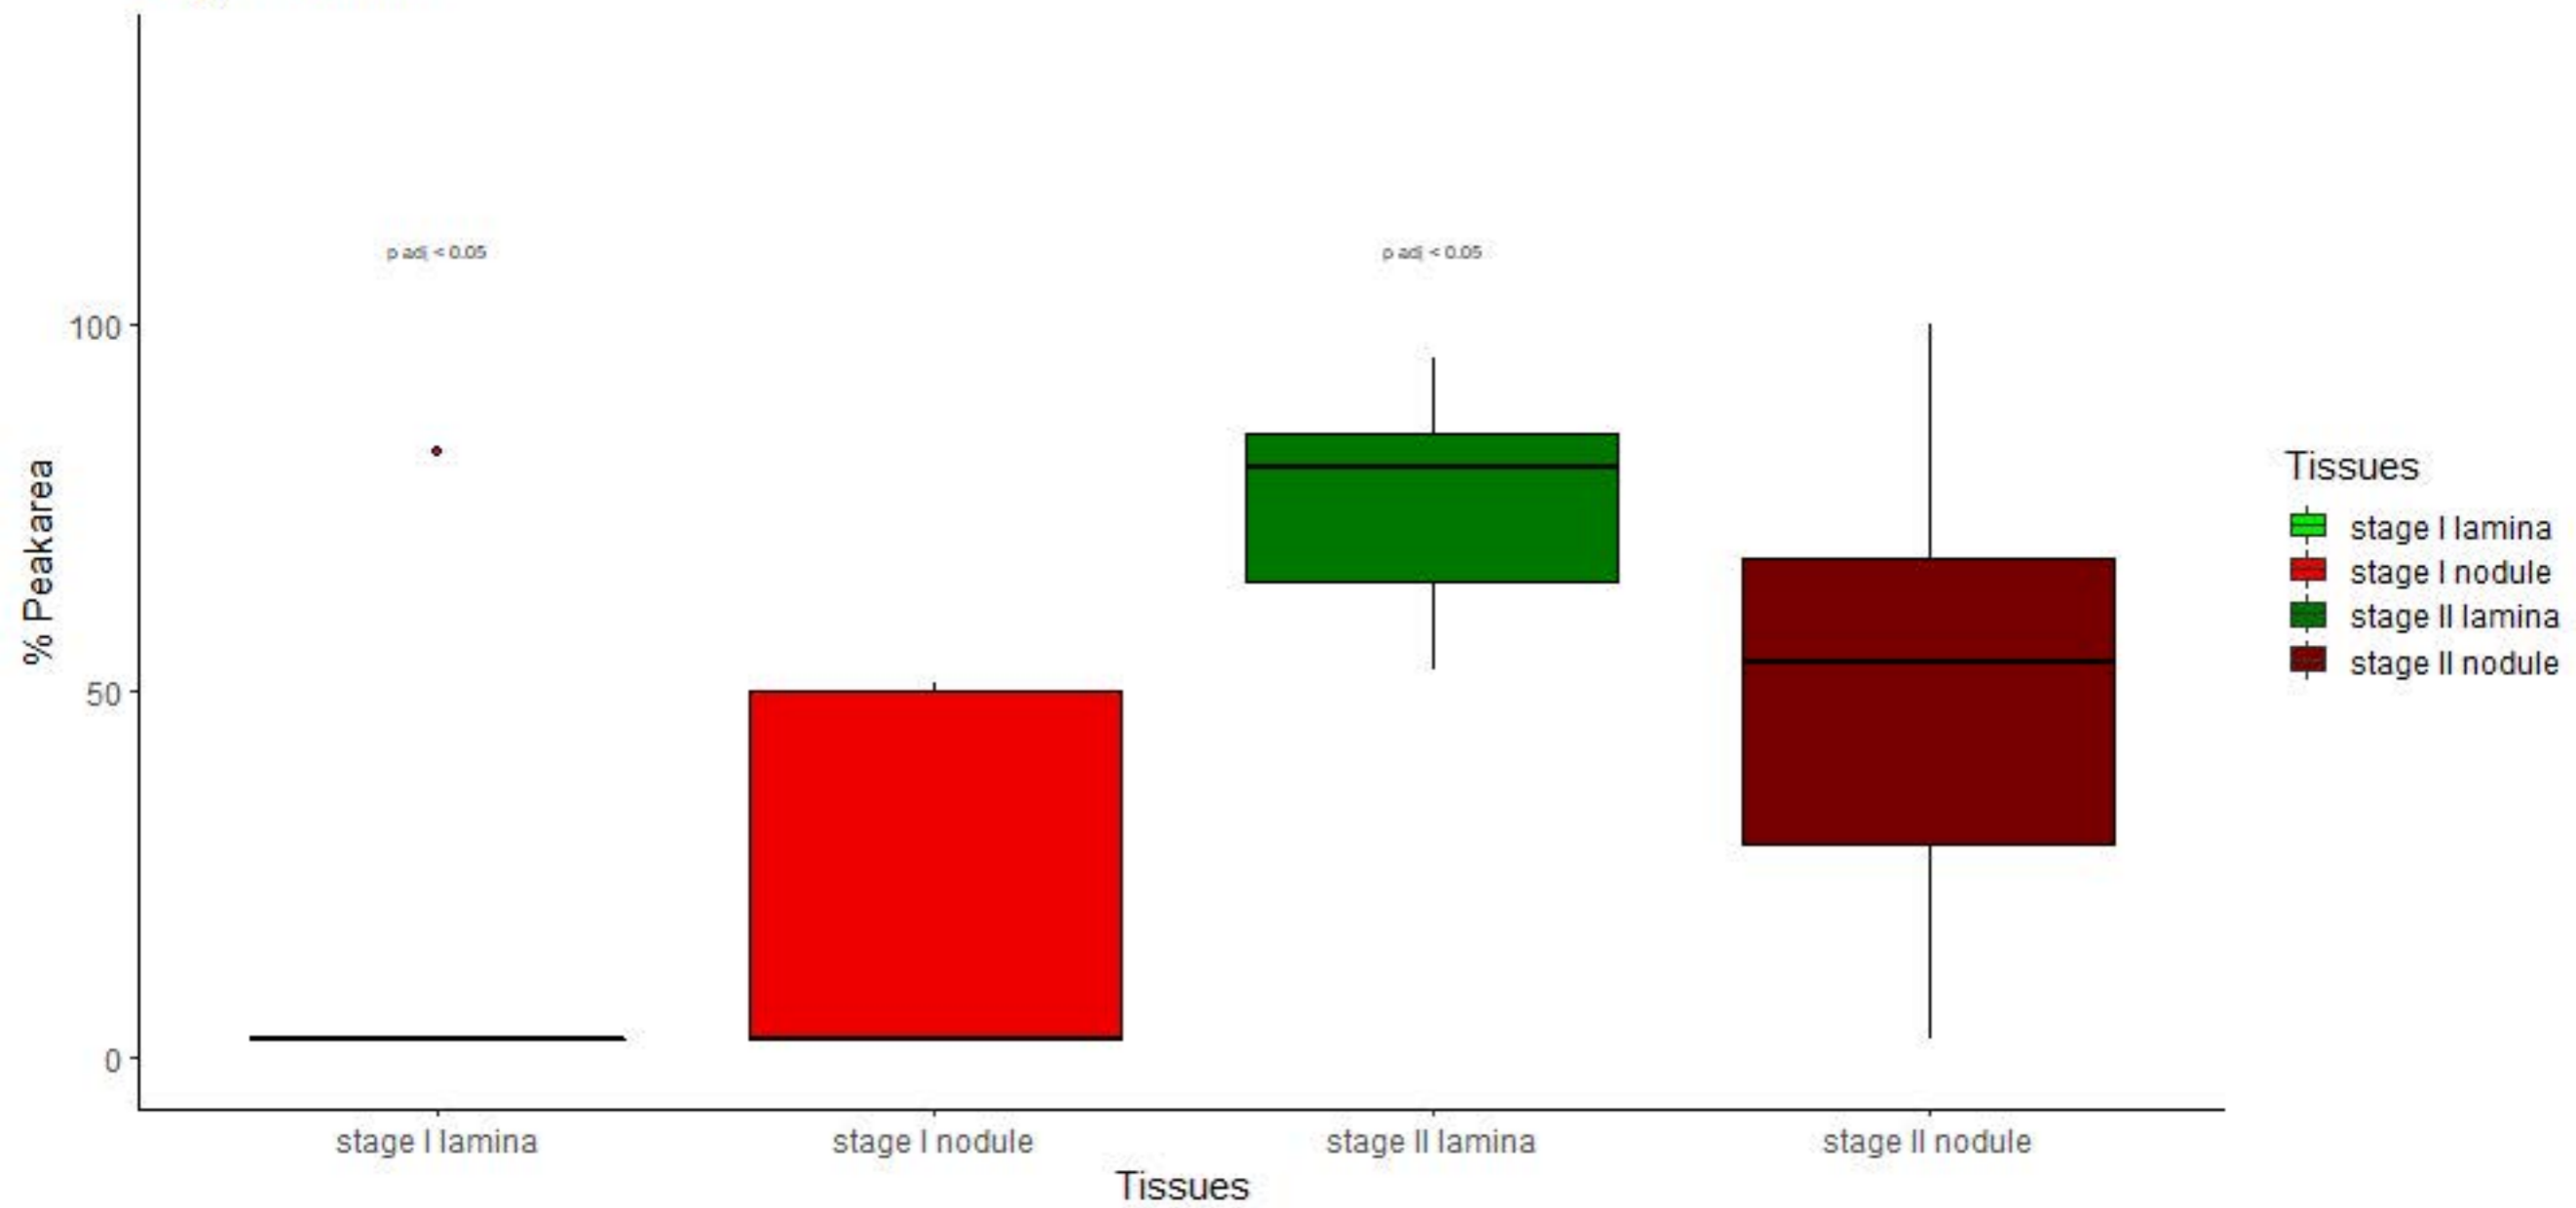

# Tocopherol, alpha-

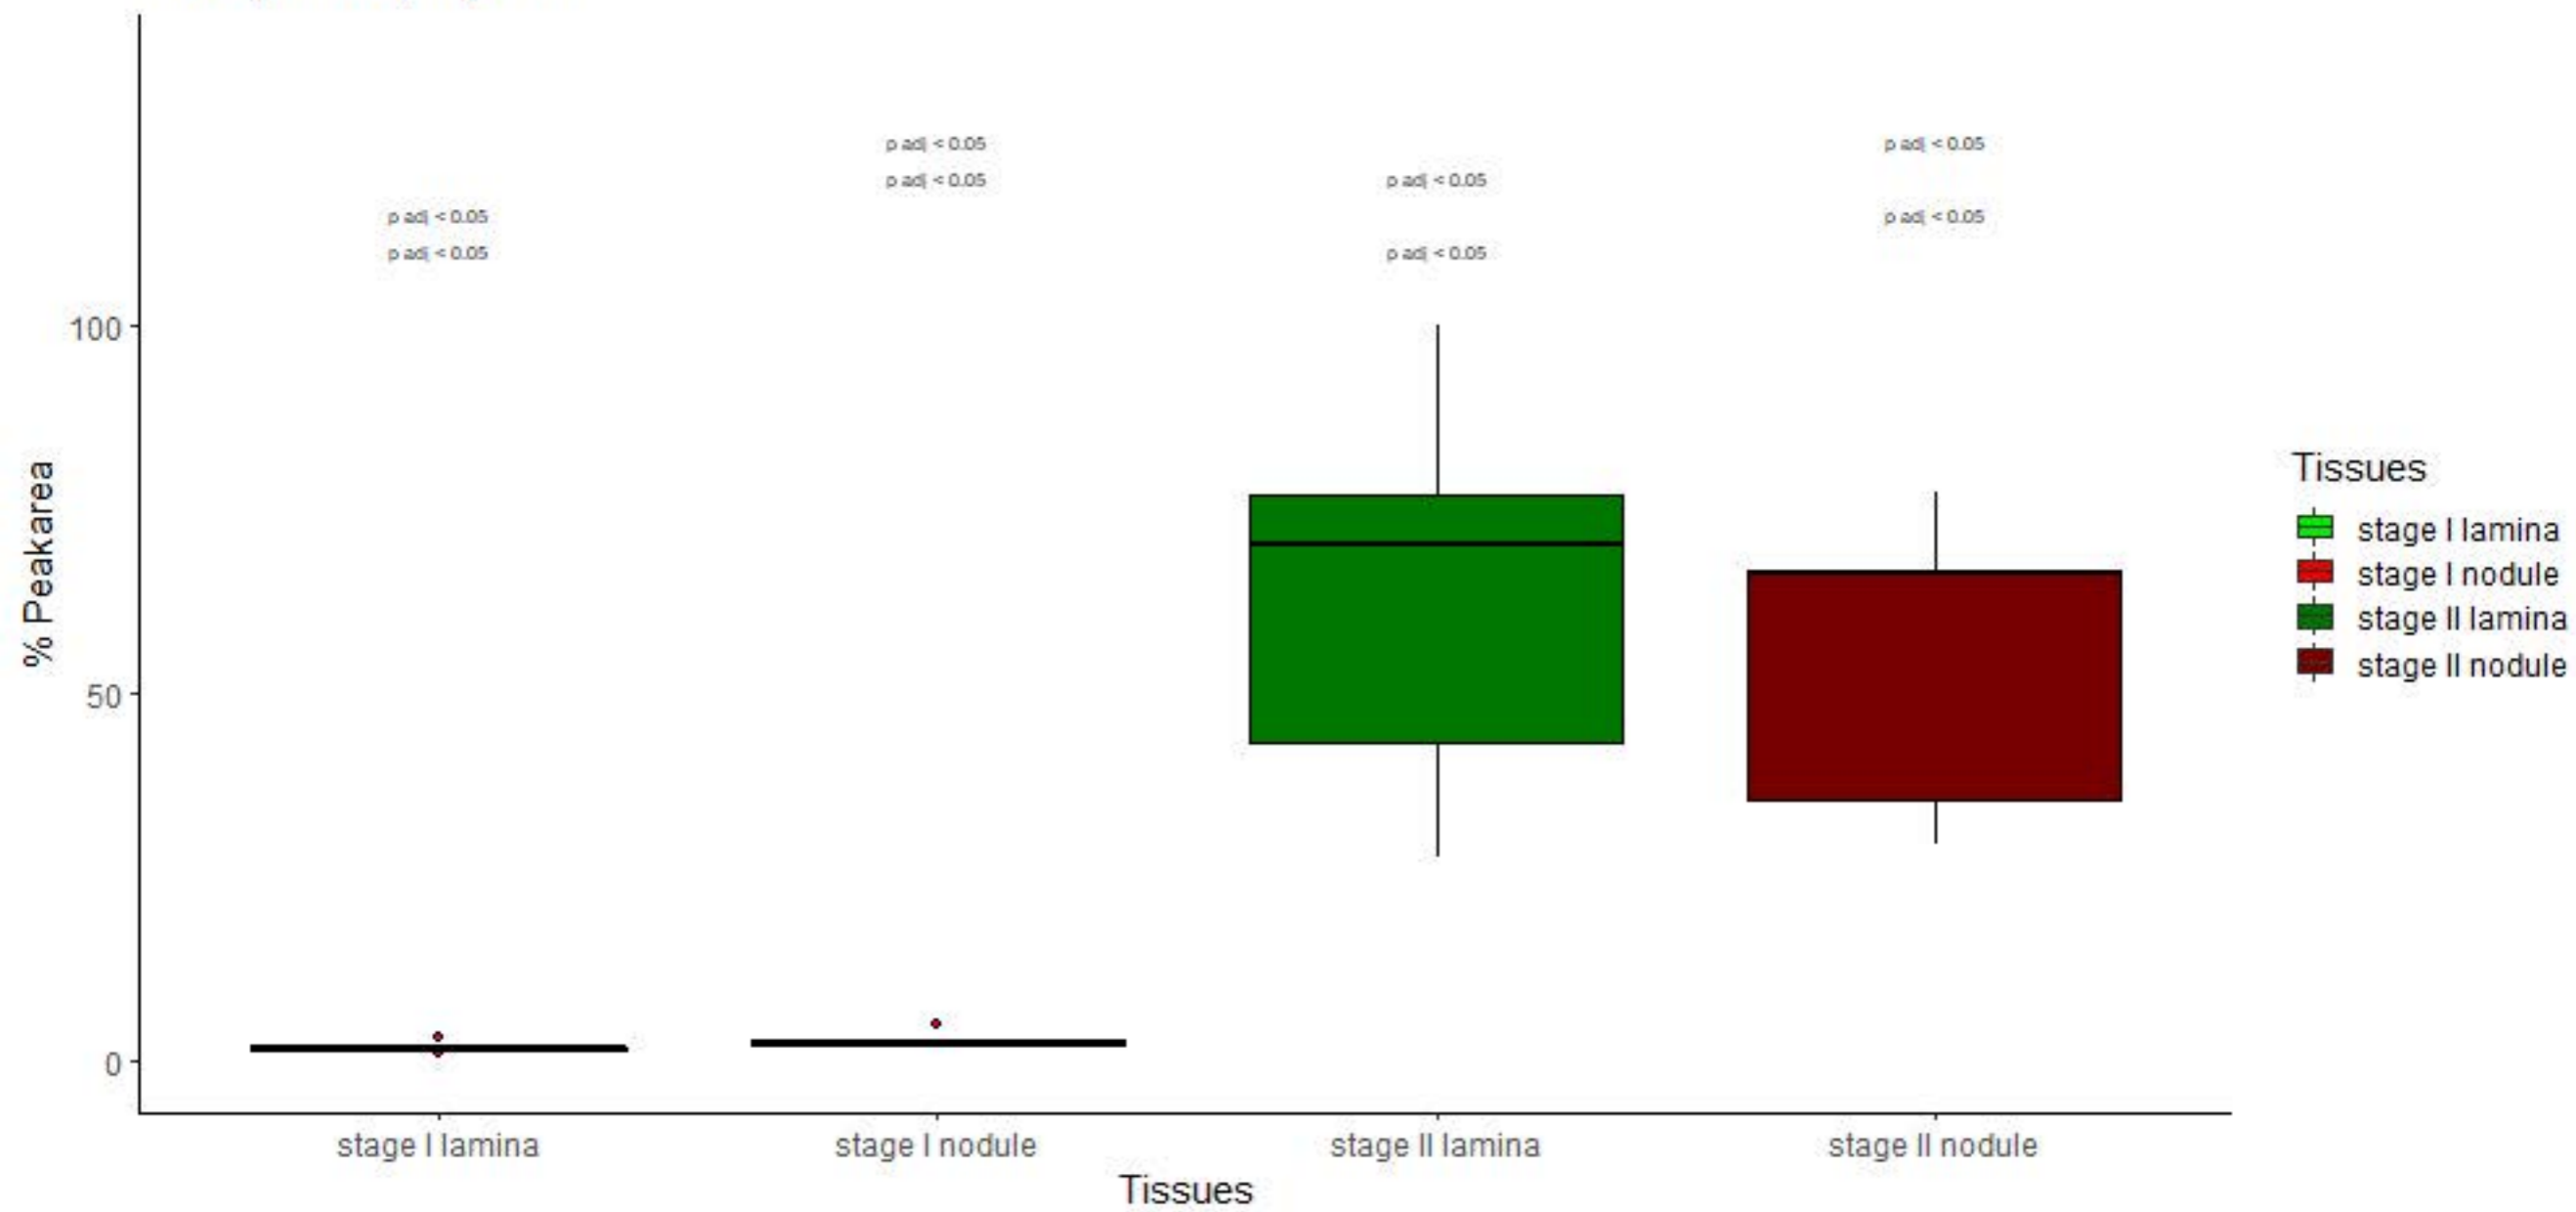

## ART/CONT RI 1617 mz117, 205, 249, 438

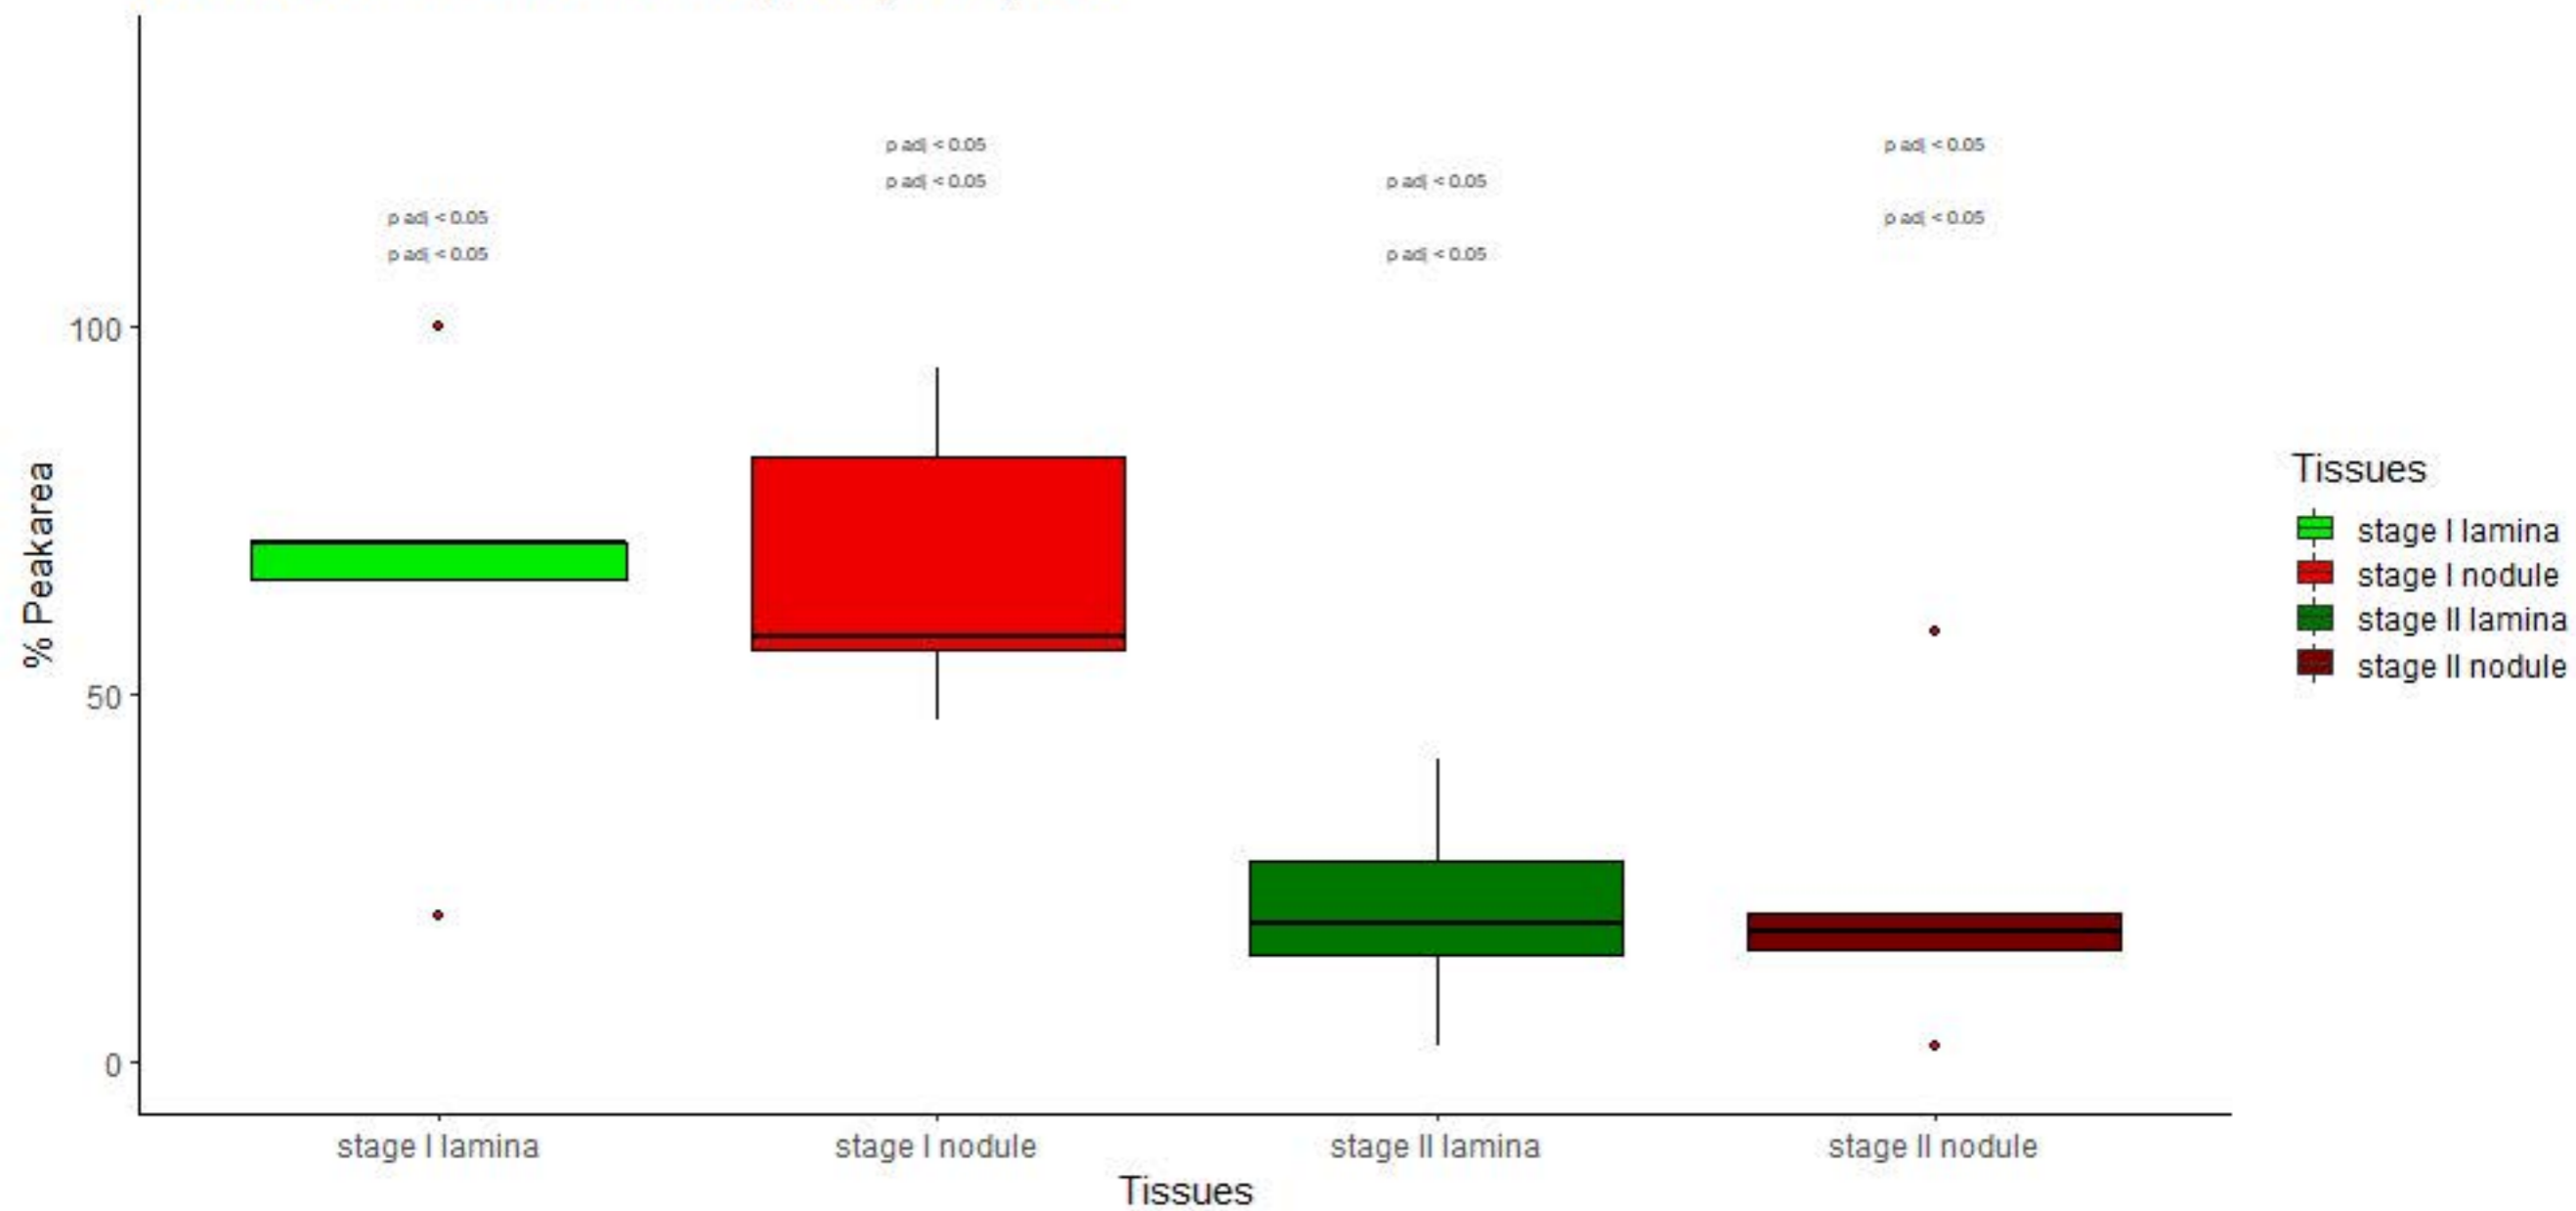

# EITTMS\_N12C\_ATHR\_1585.2\_1135EC44

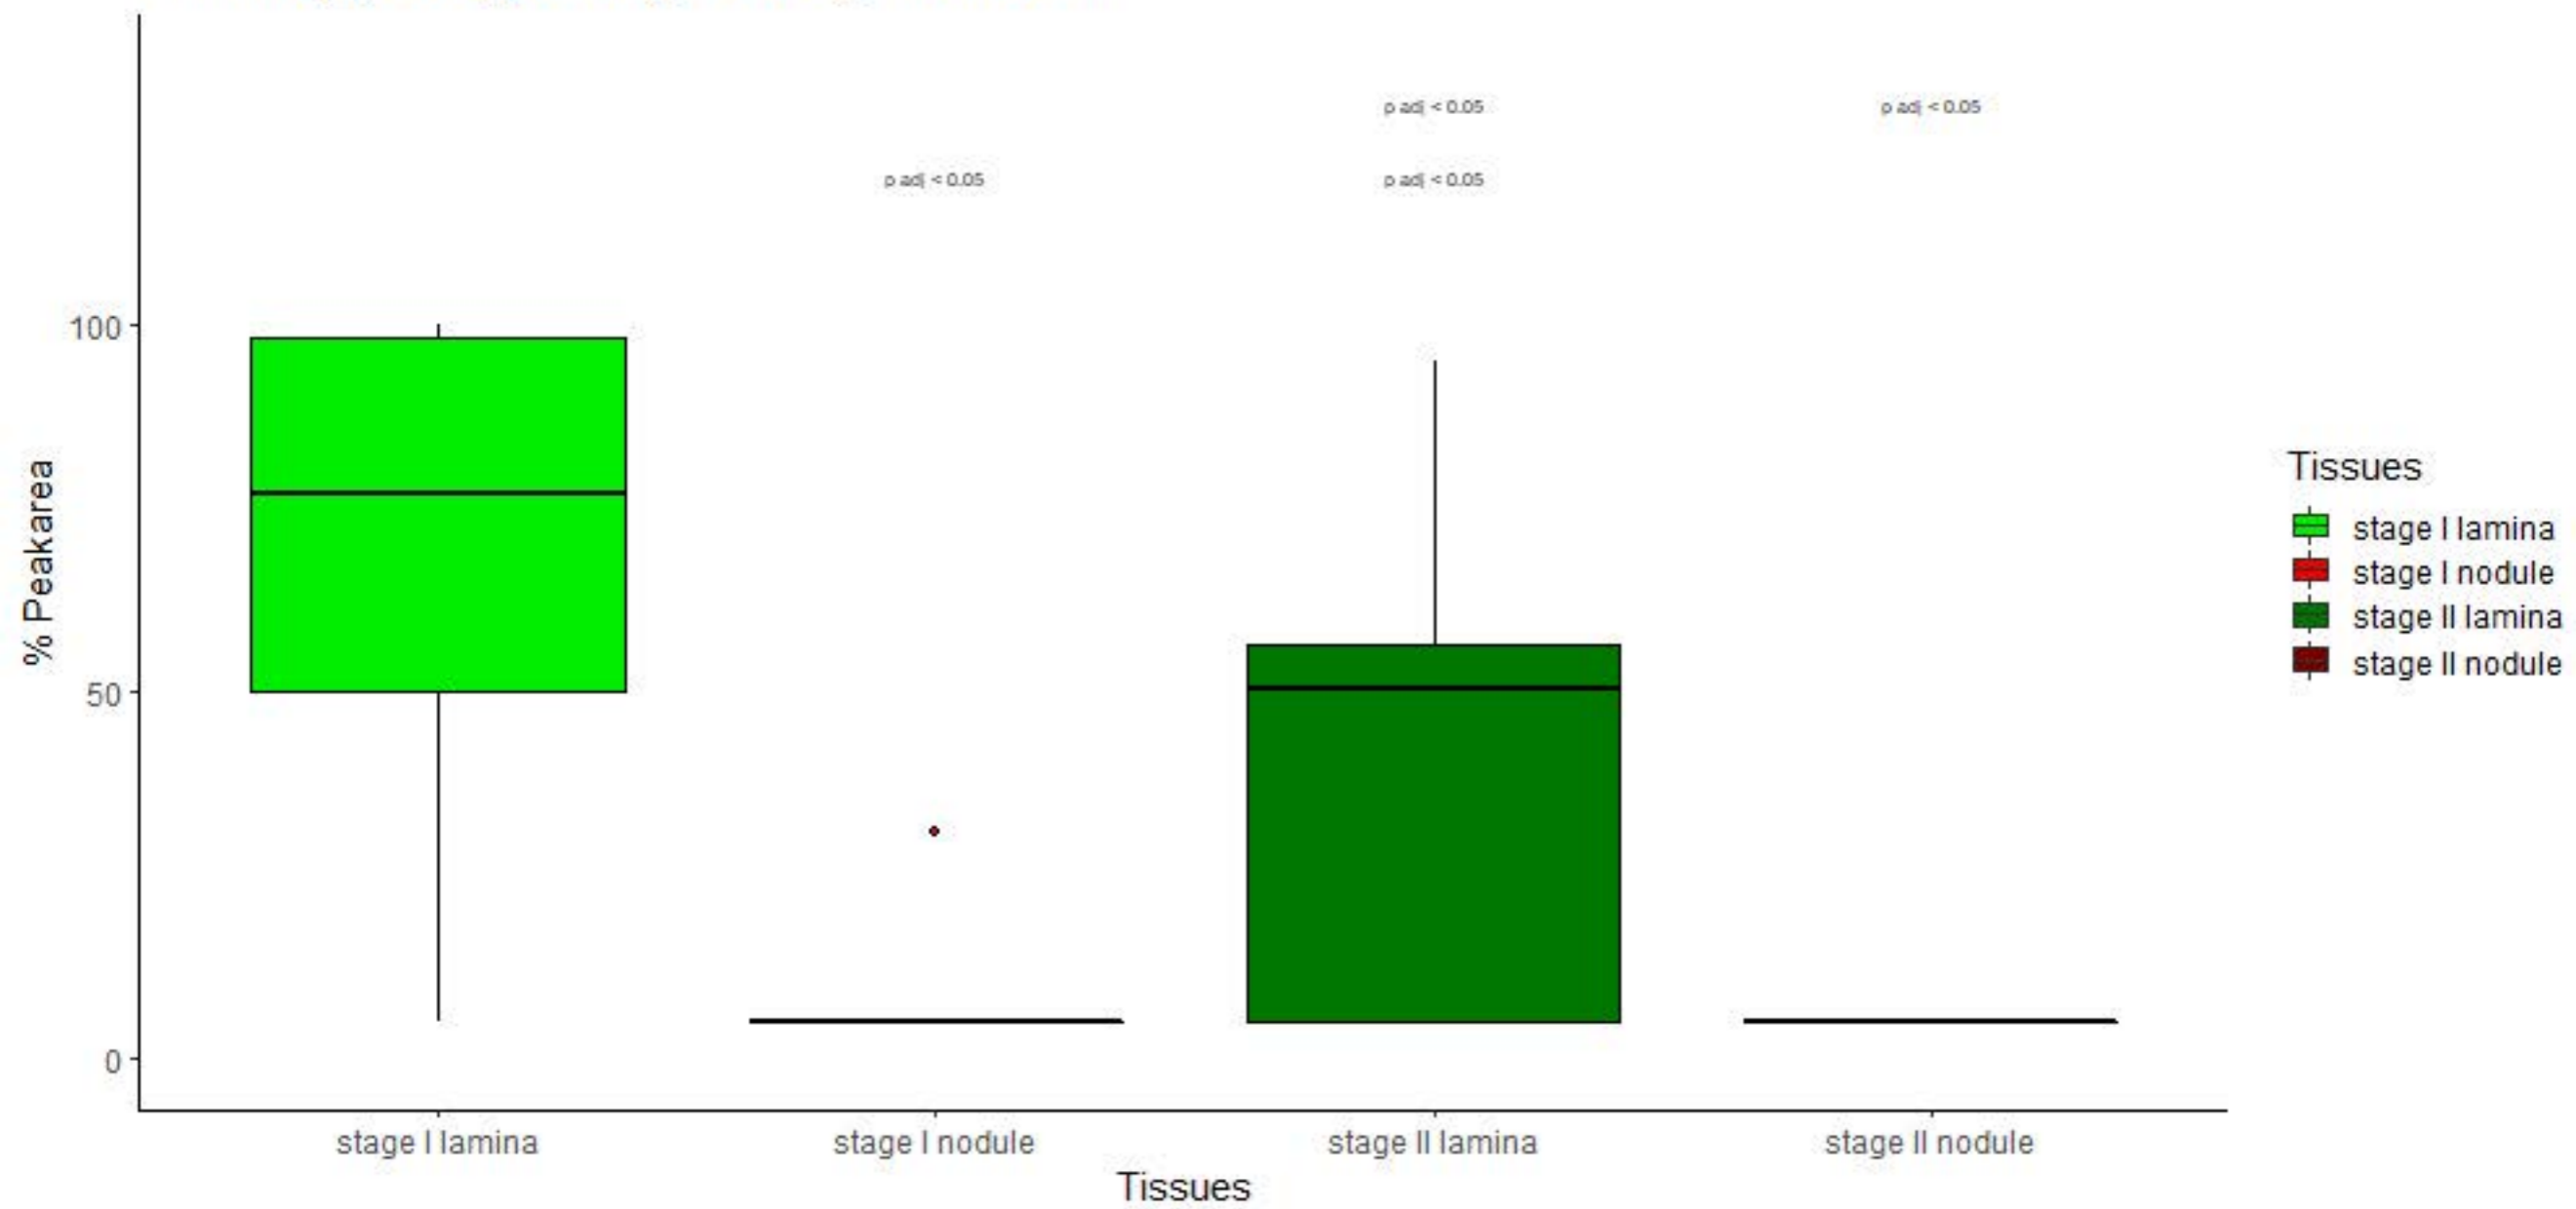

# NA 163 fatty acid

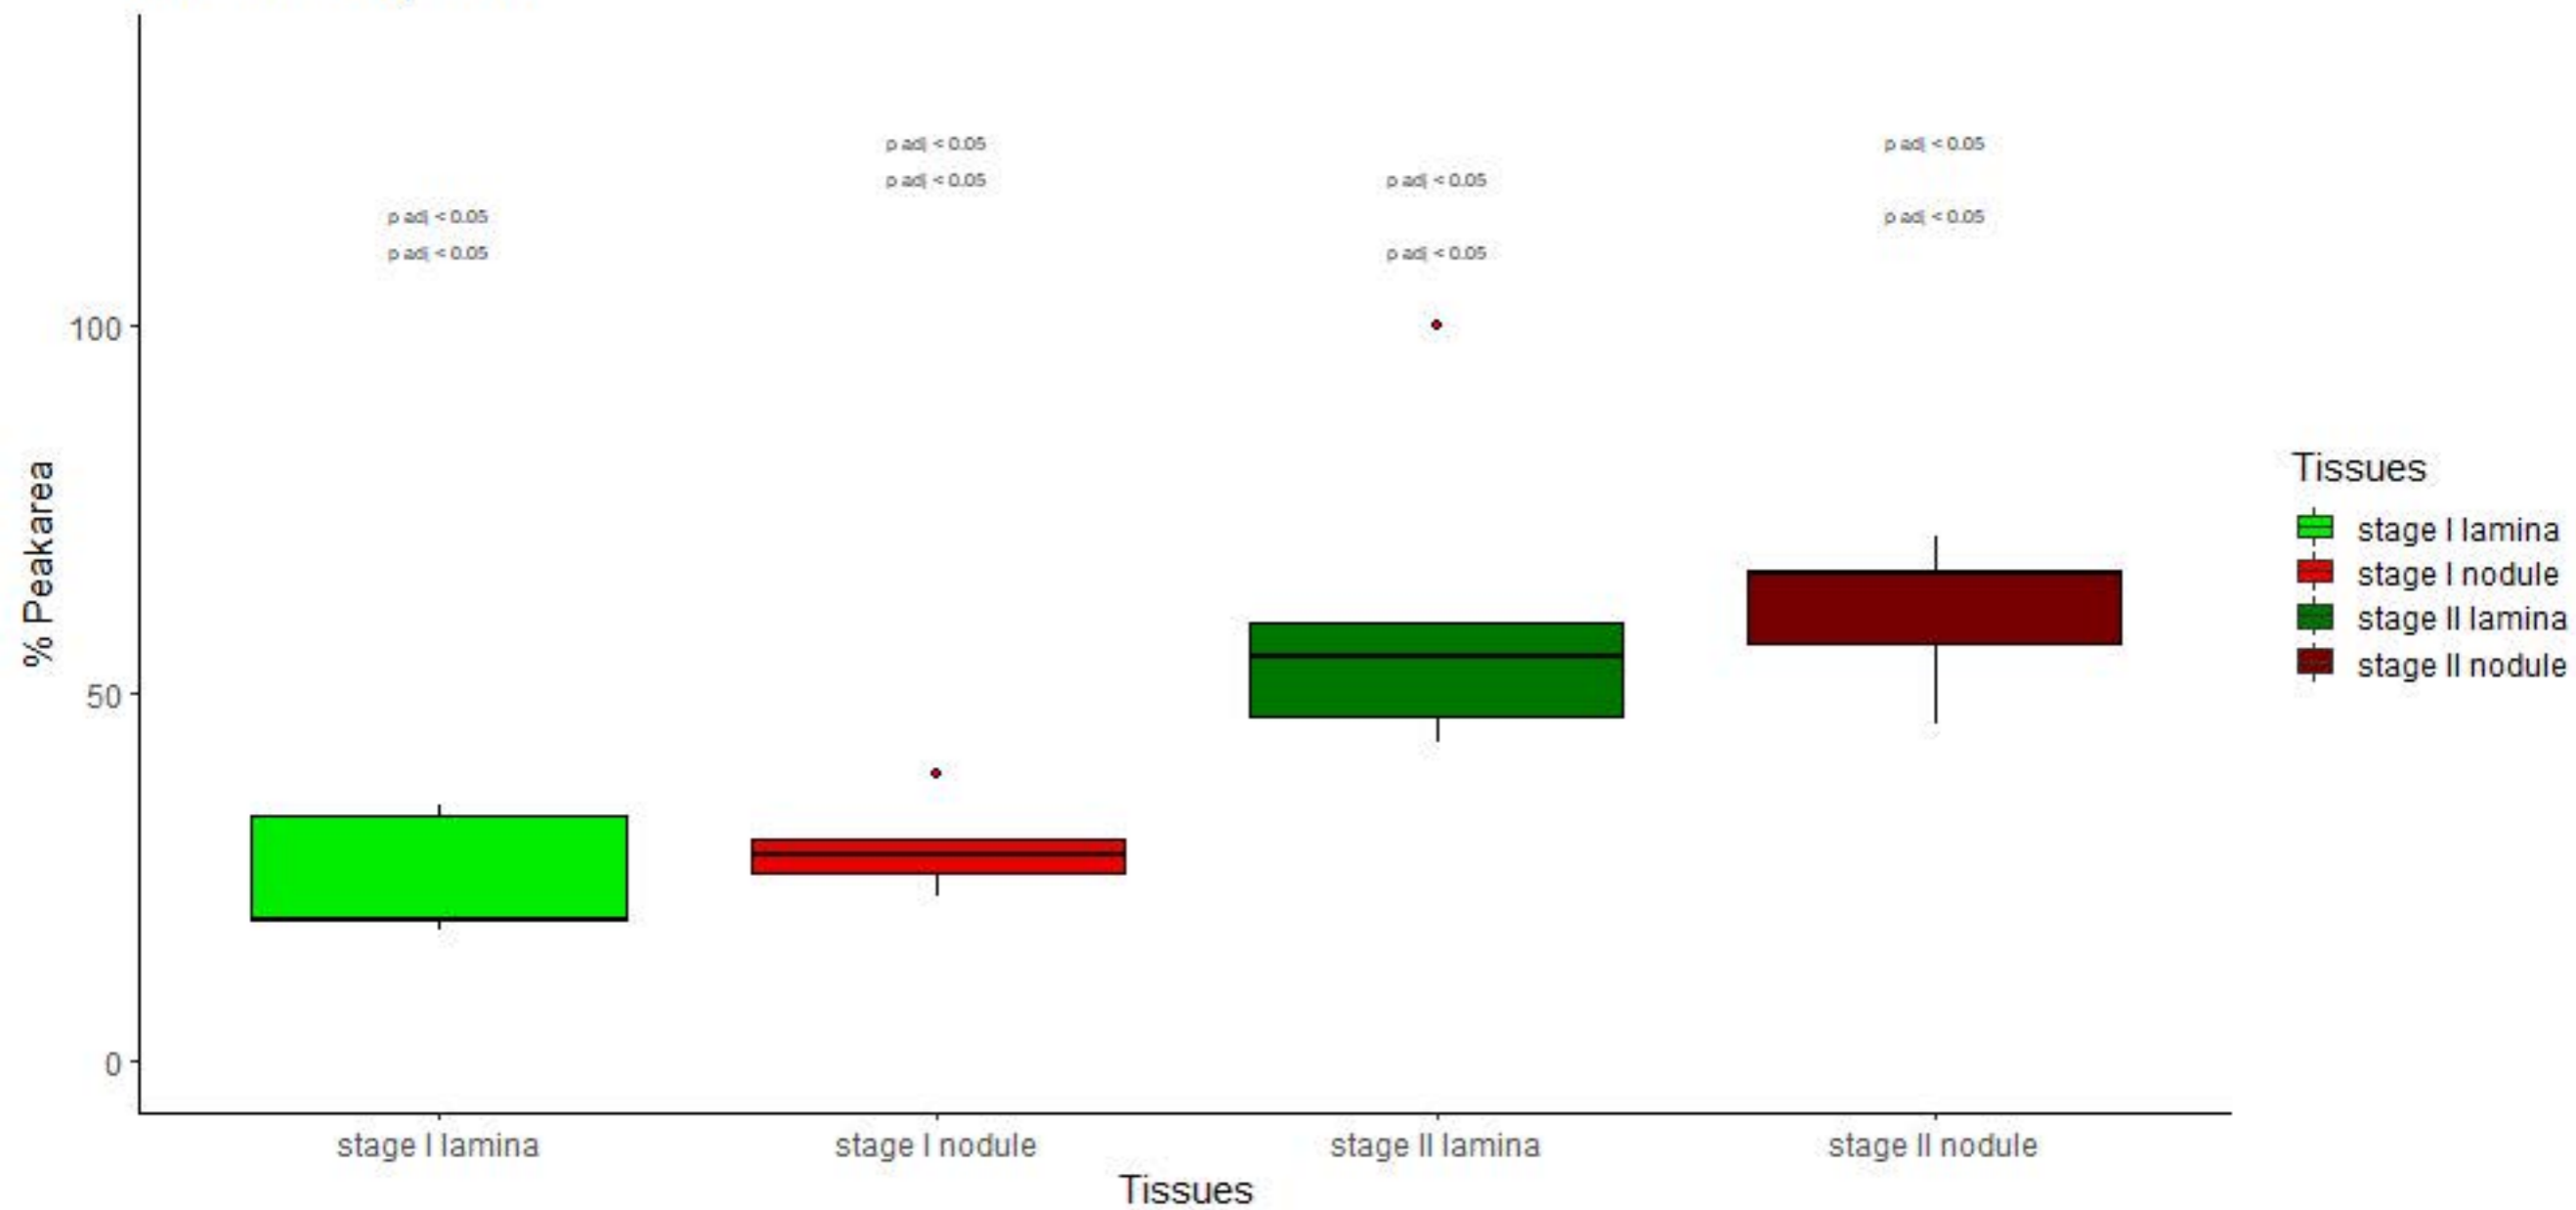



# NA Lipid/FA 139

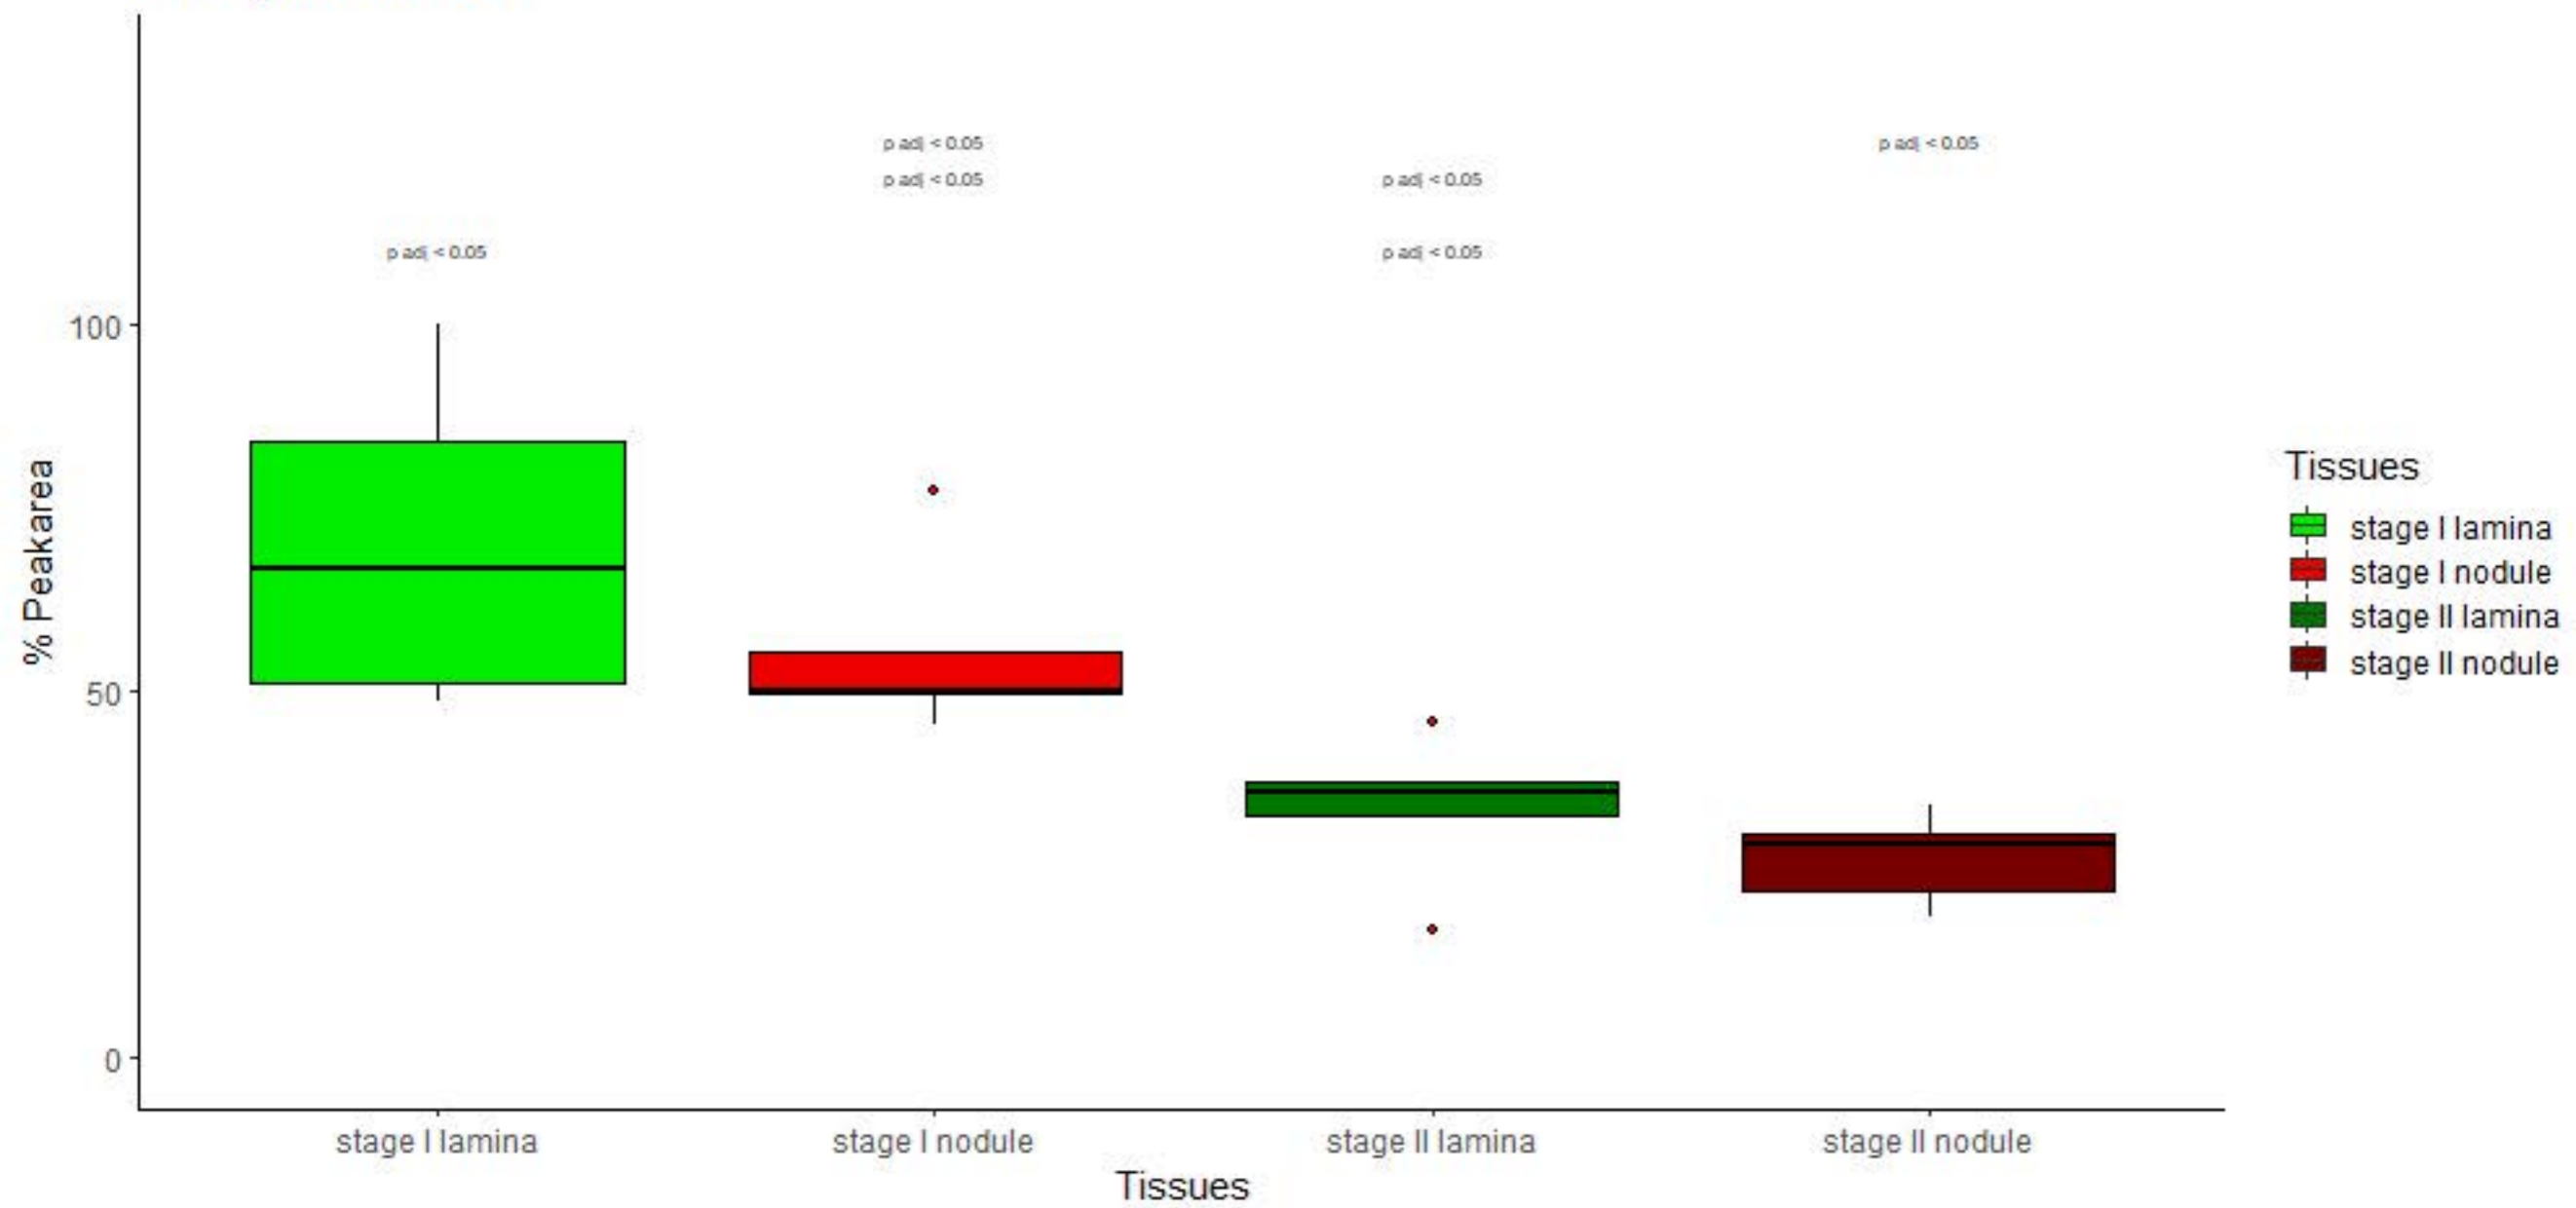

# NA Lipid/FA 140

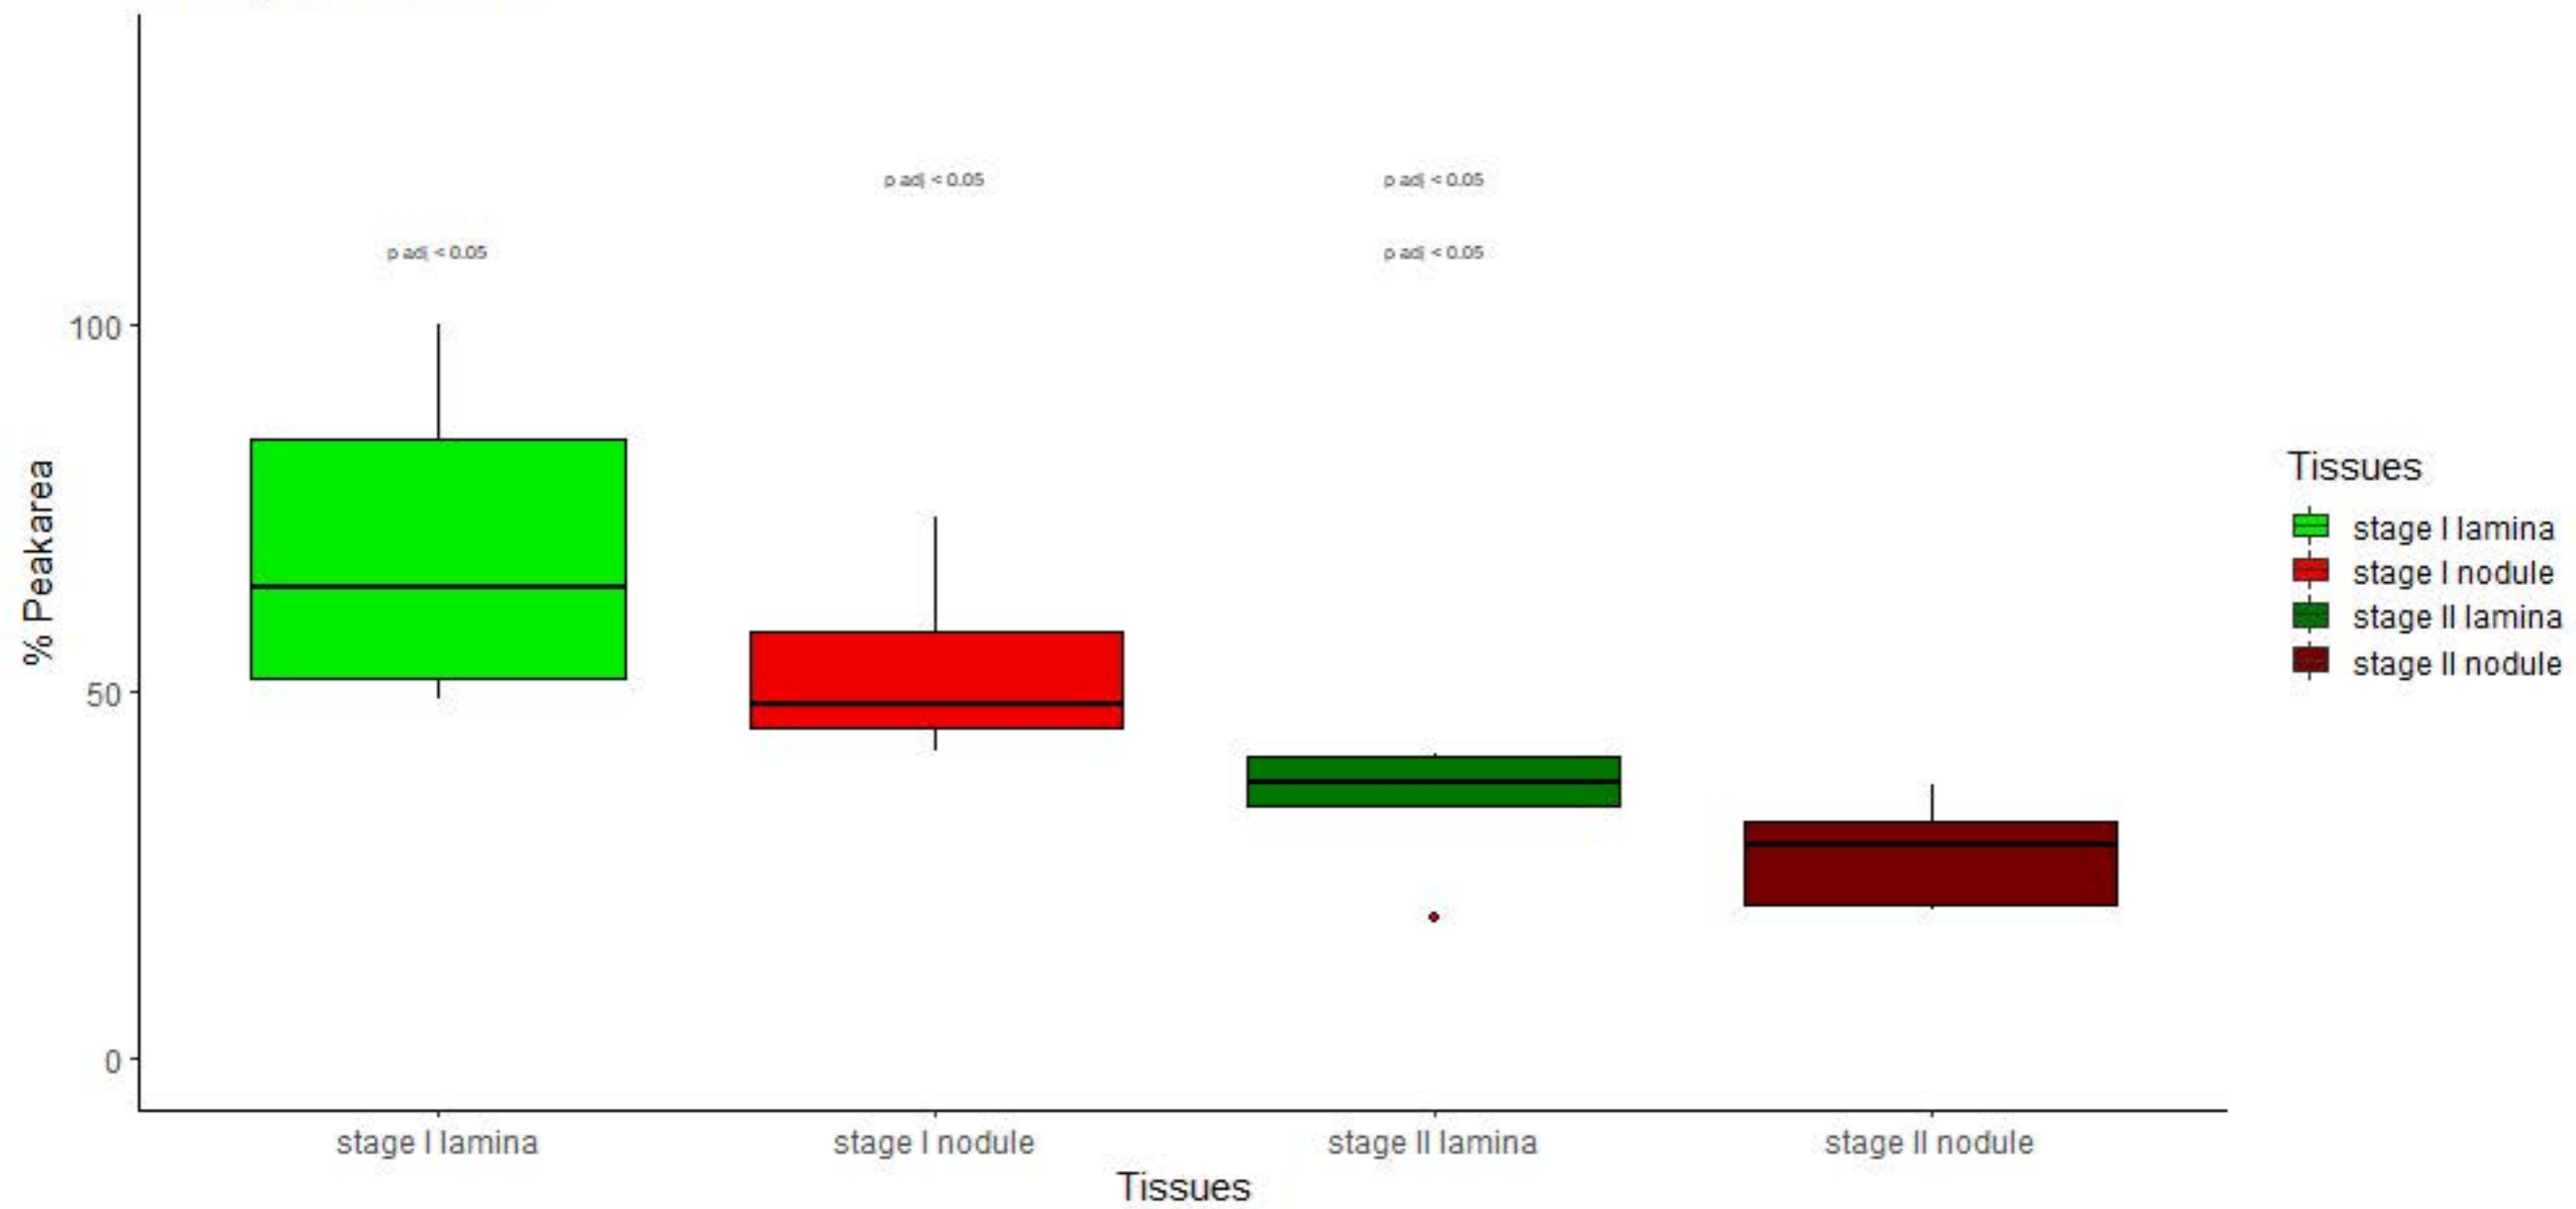

# NA Lipid/FA 141

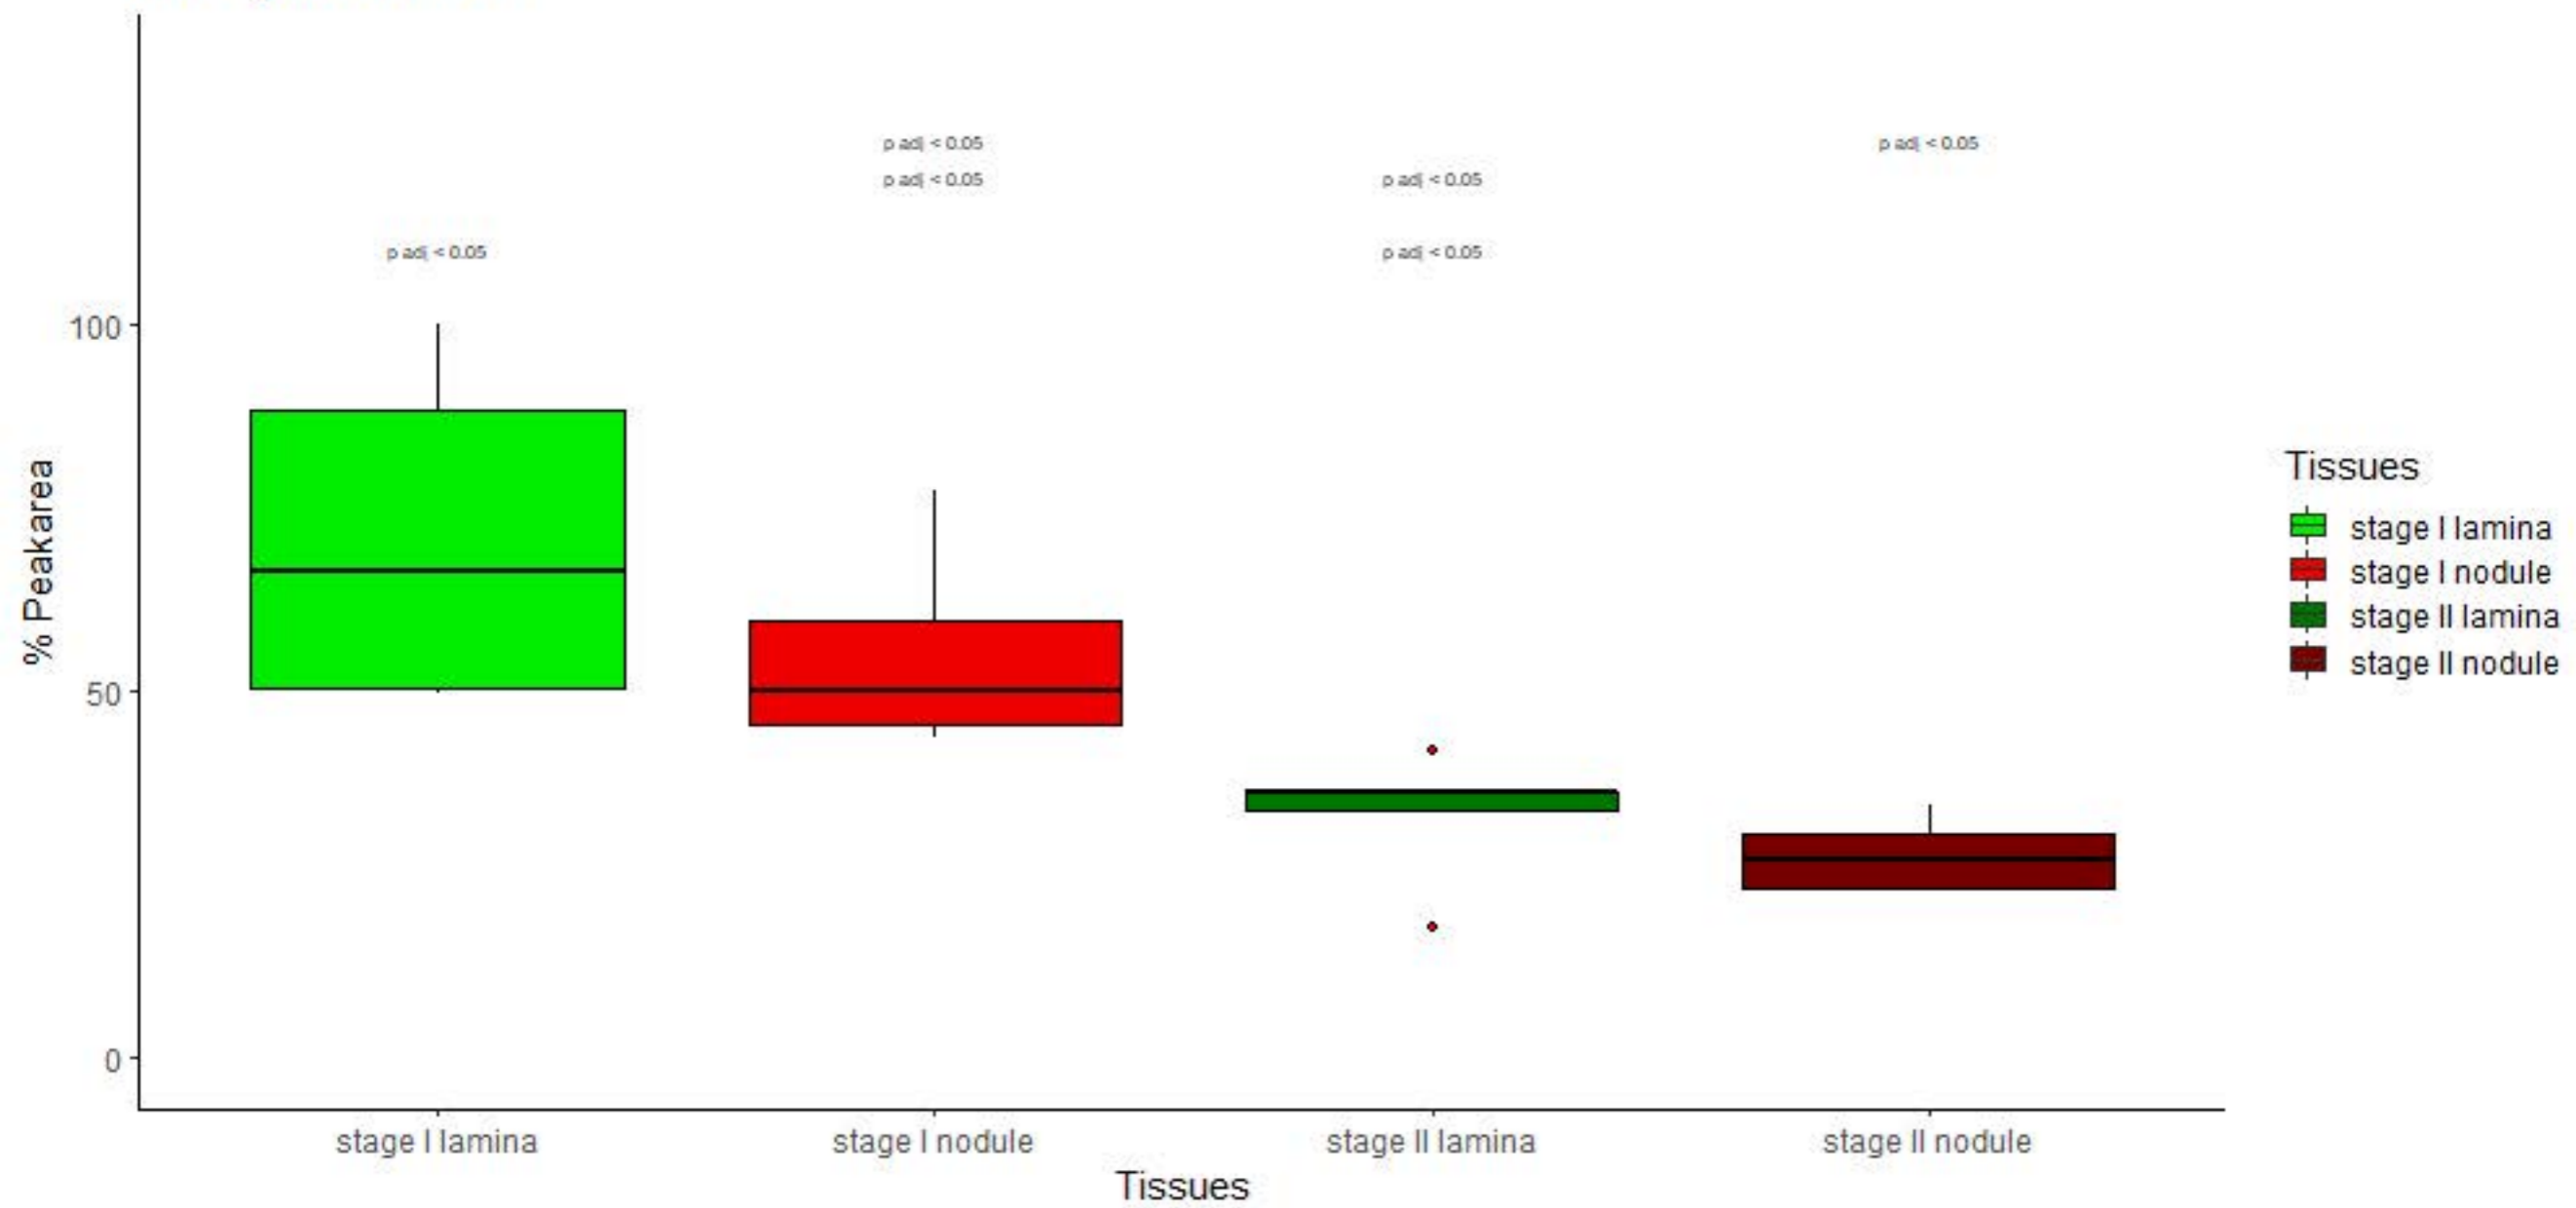

# NA Carbohydrate 1

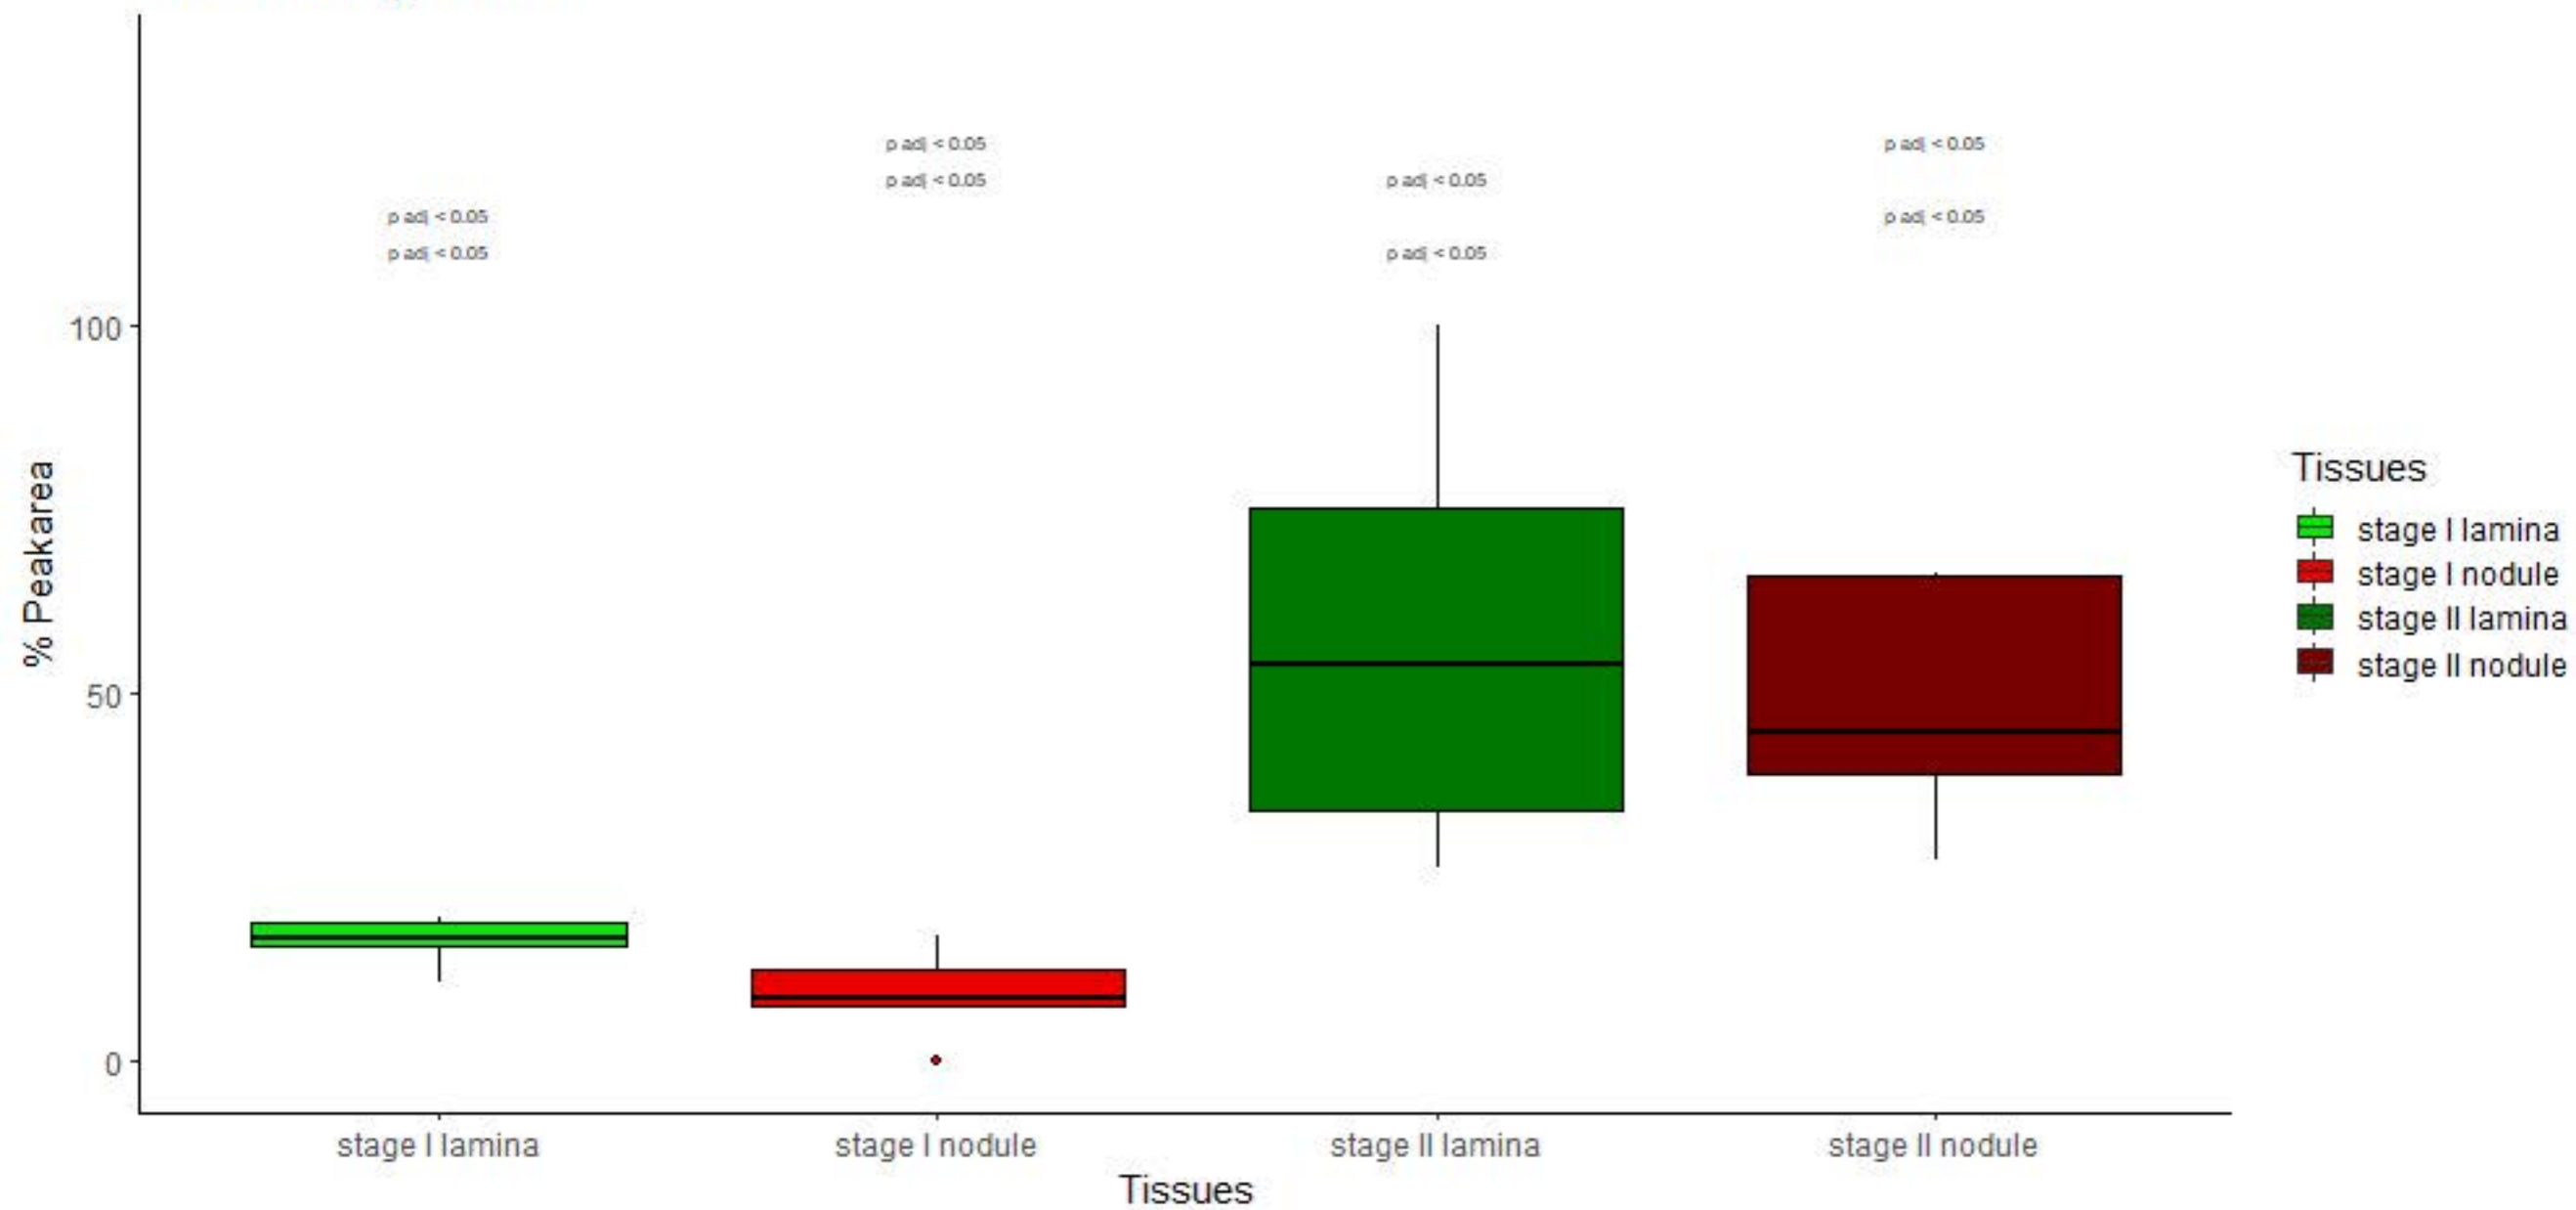

# NA Carbohydrate 135

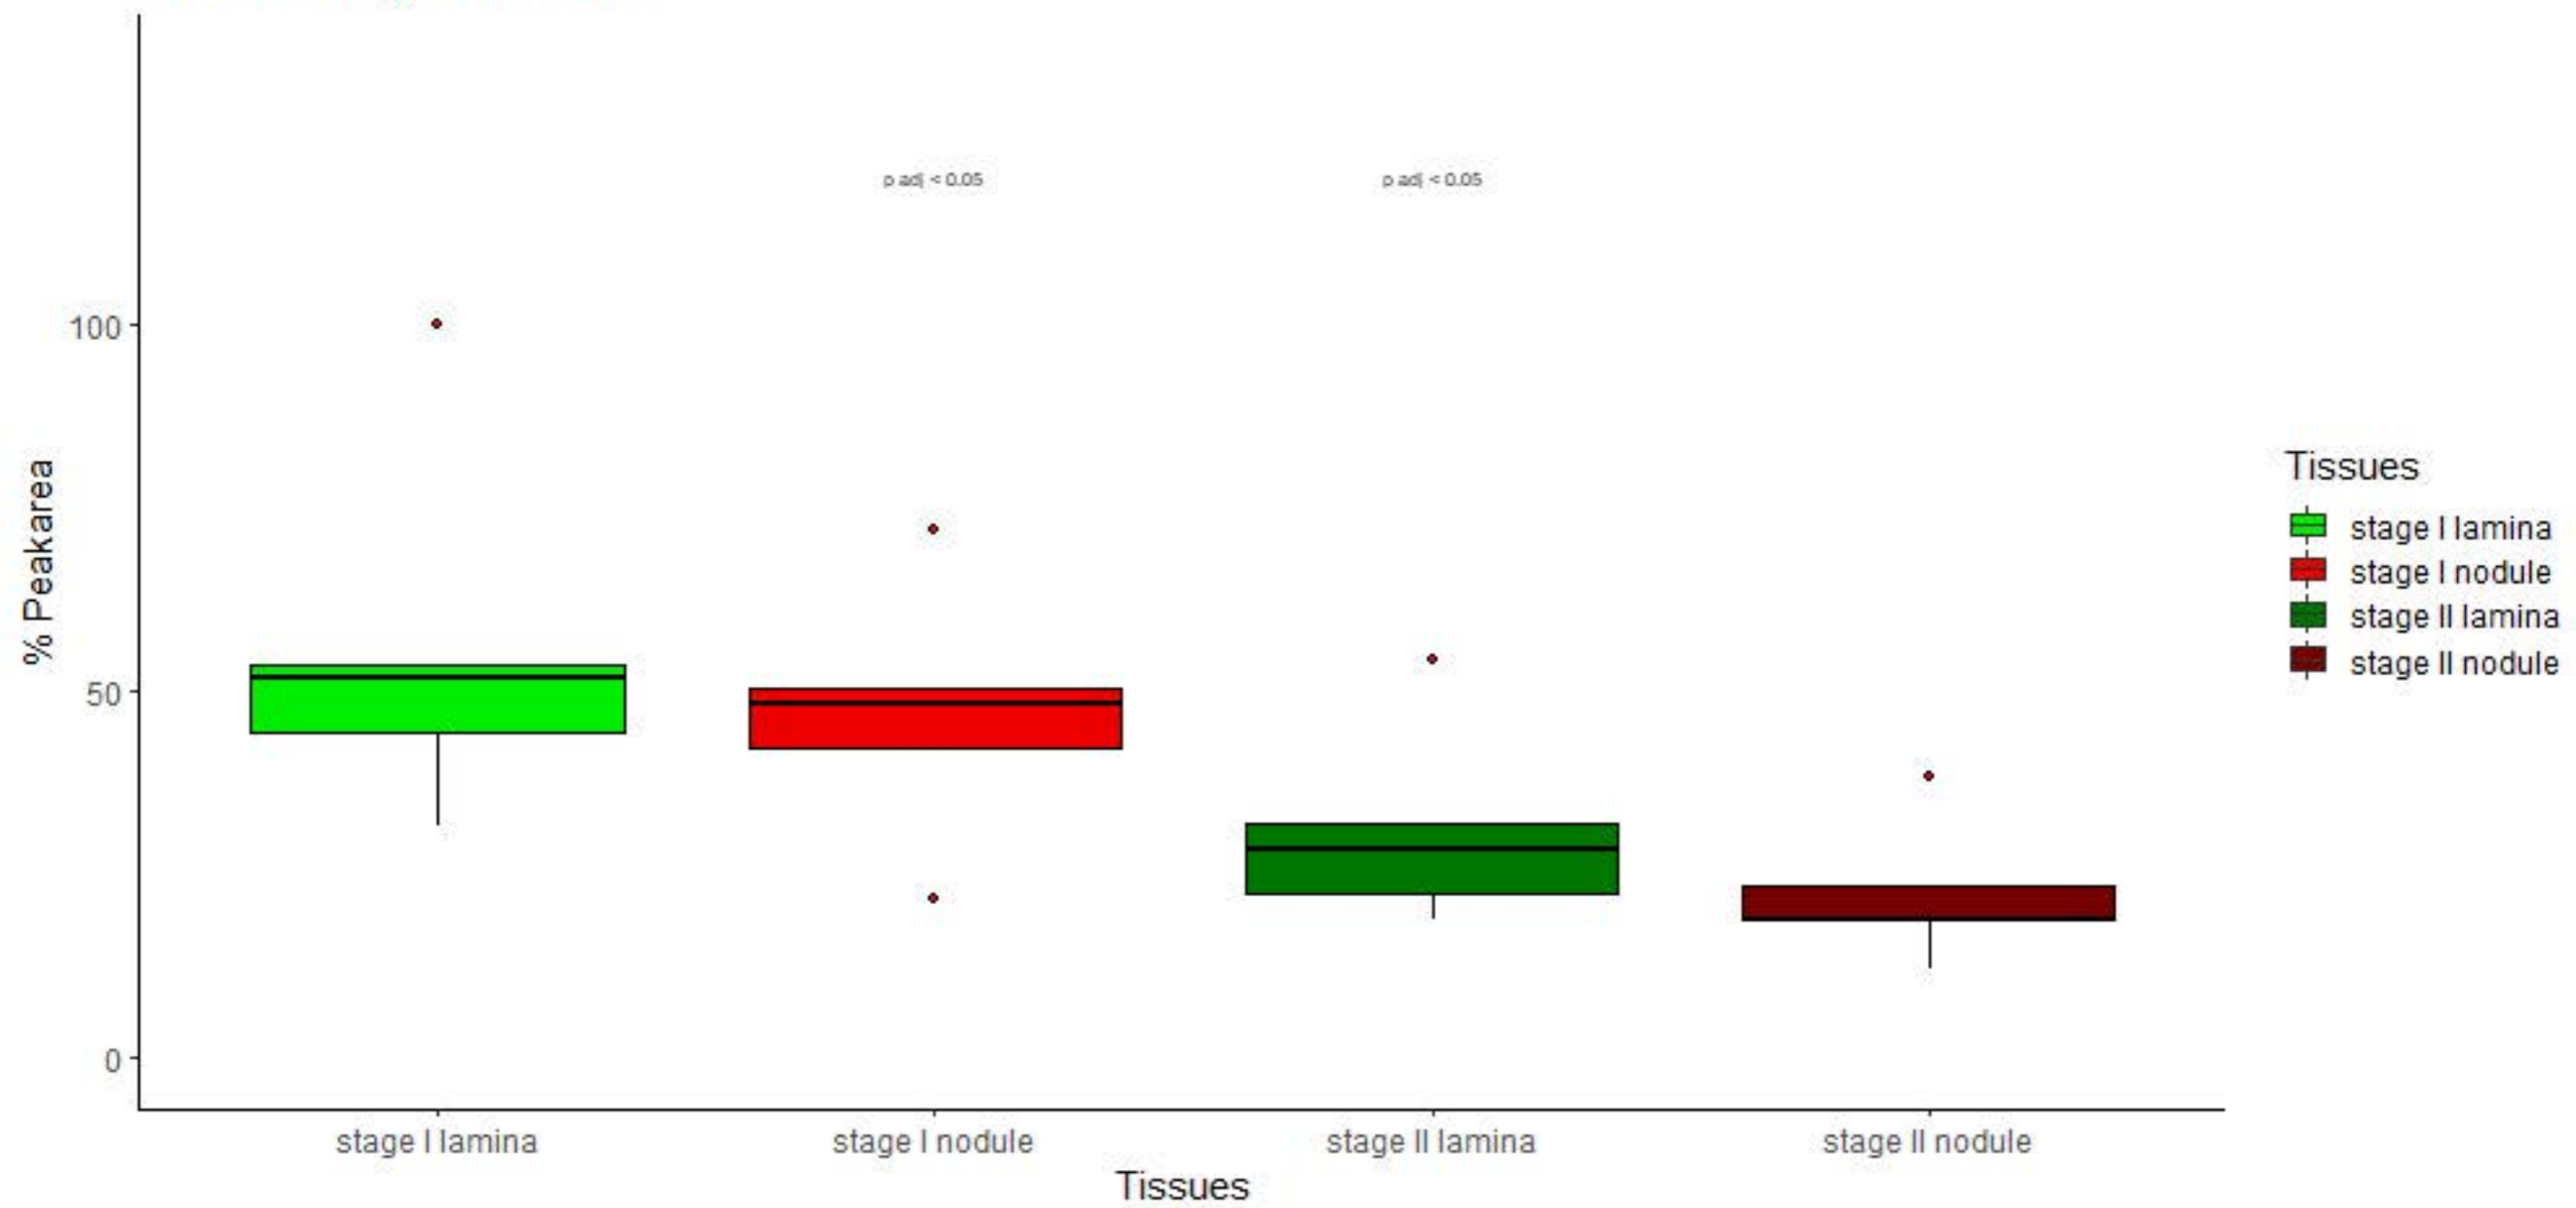

# NA 17Carbohydrate

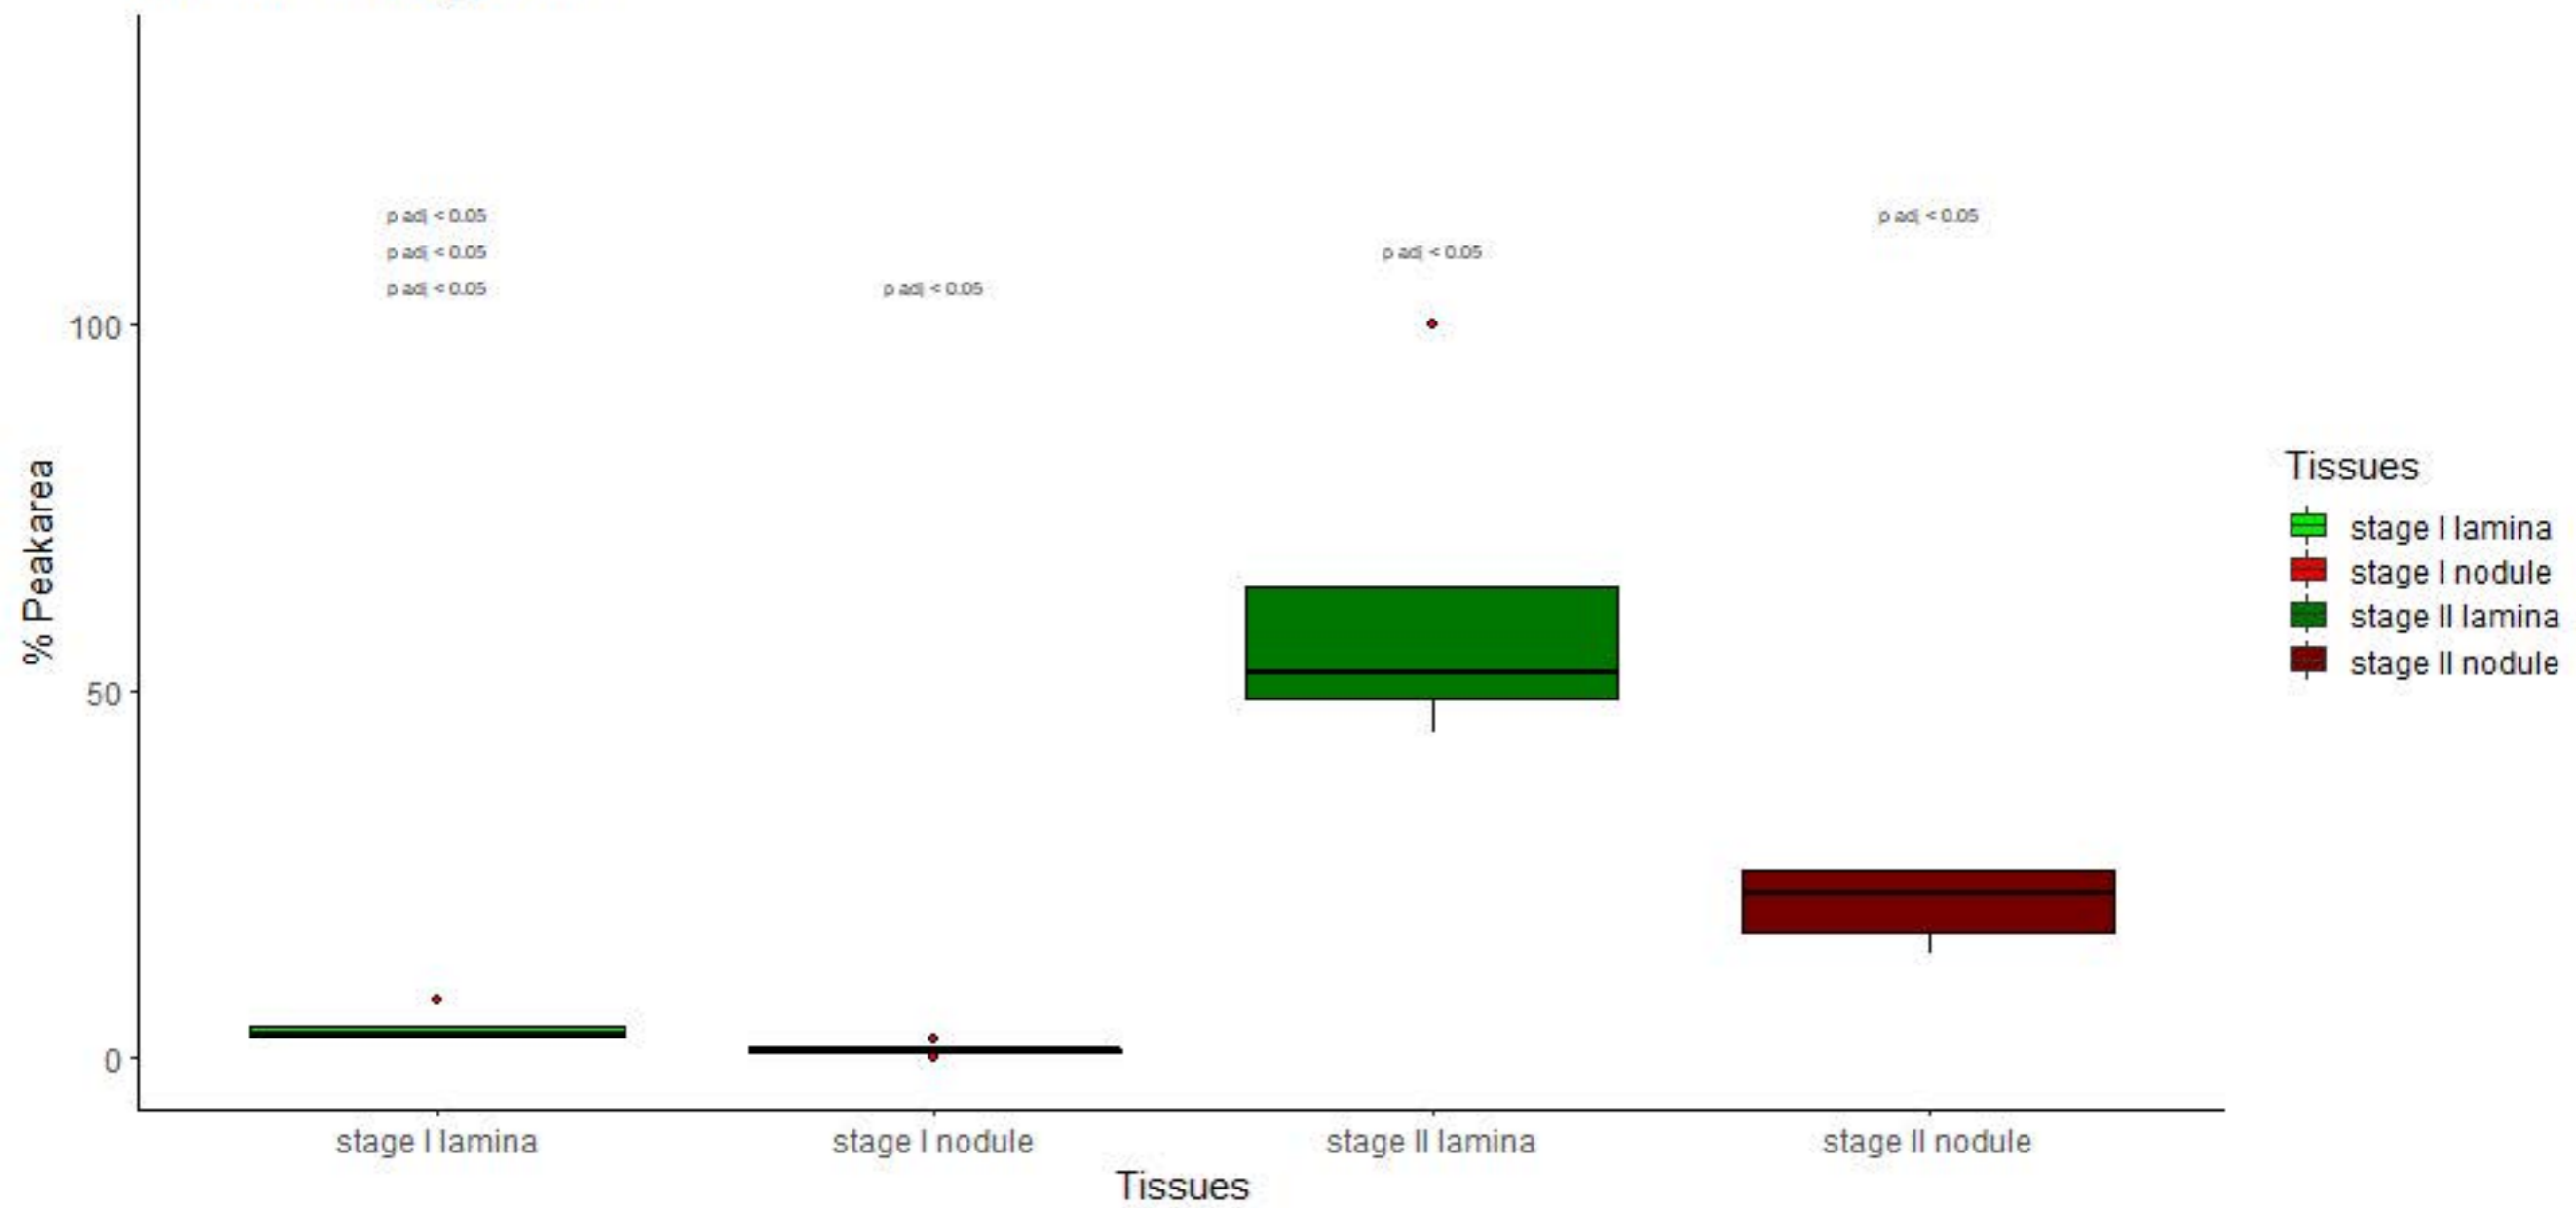

# NA 157 Carbohydrate

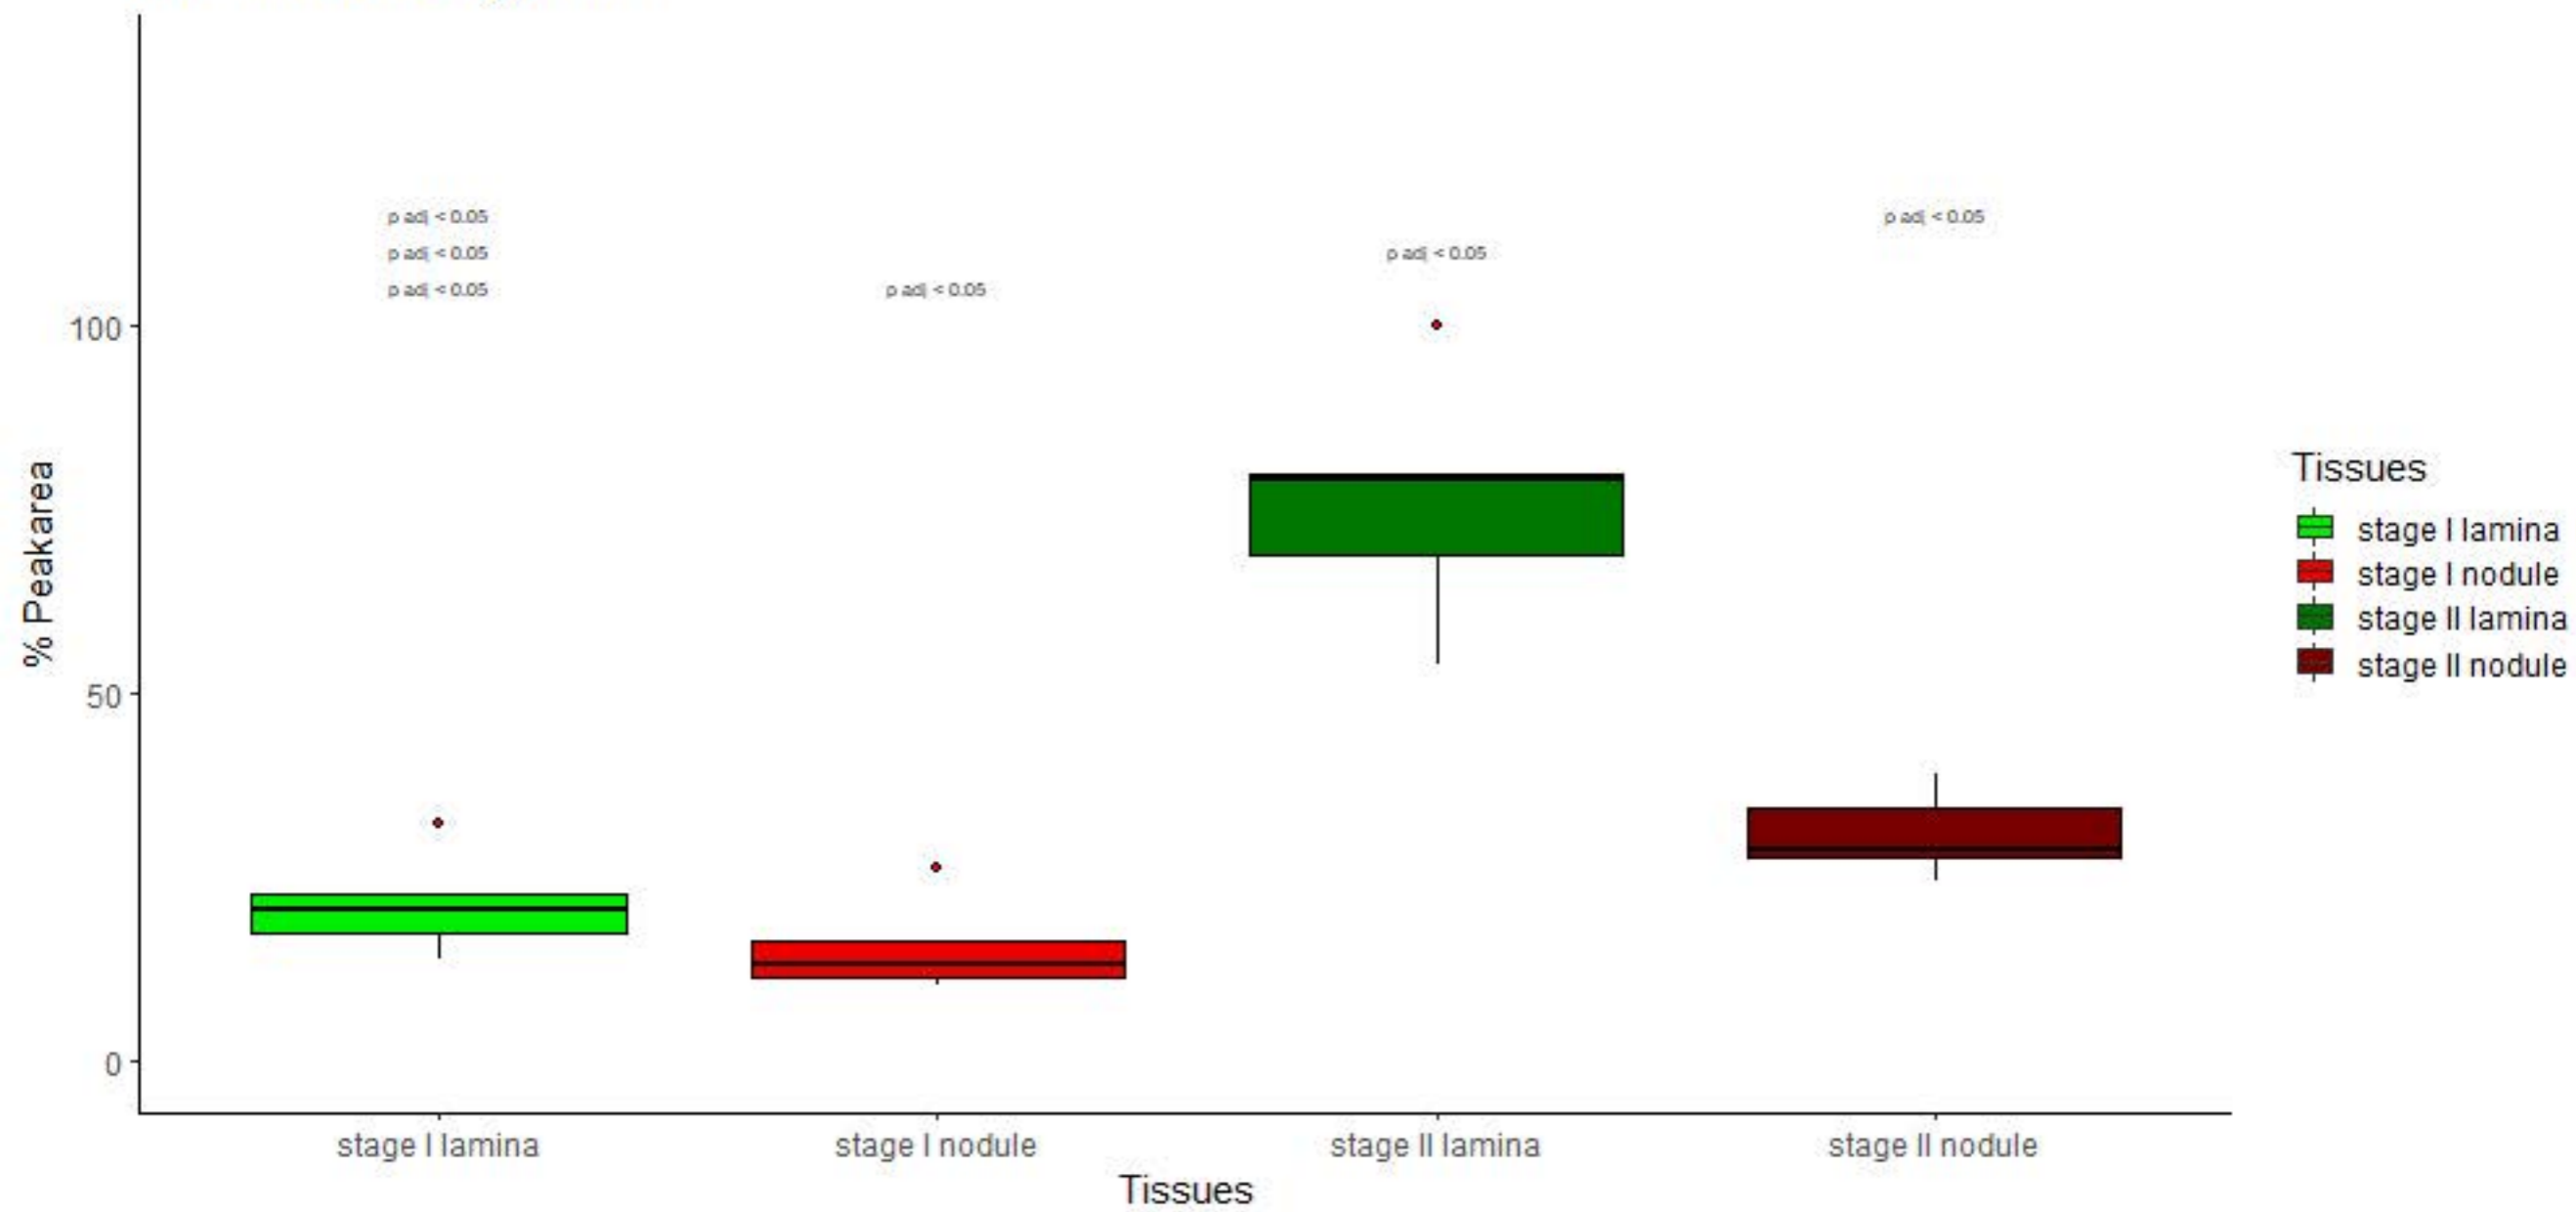

# NA 159 Carbohydrate

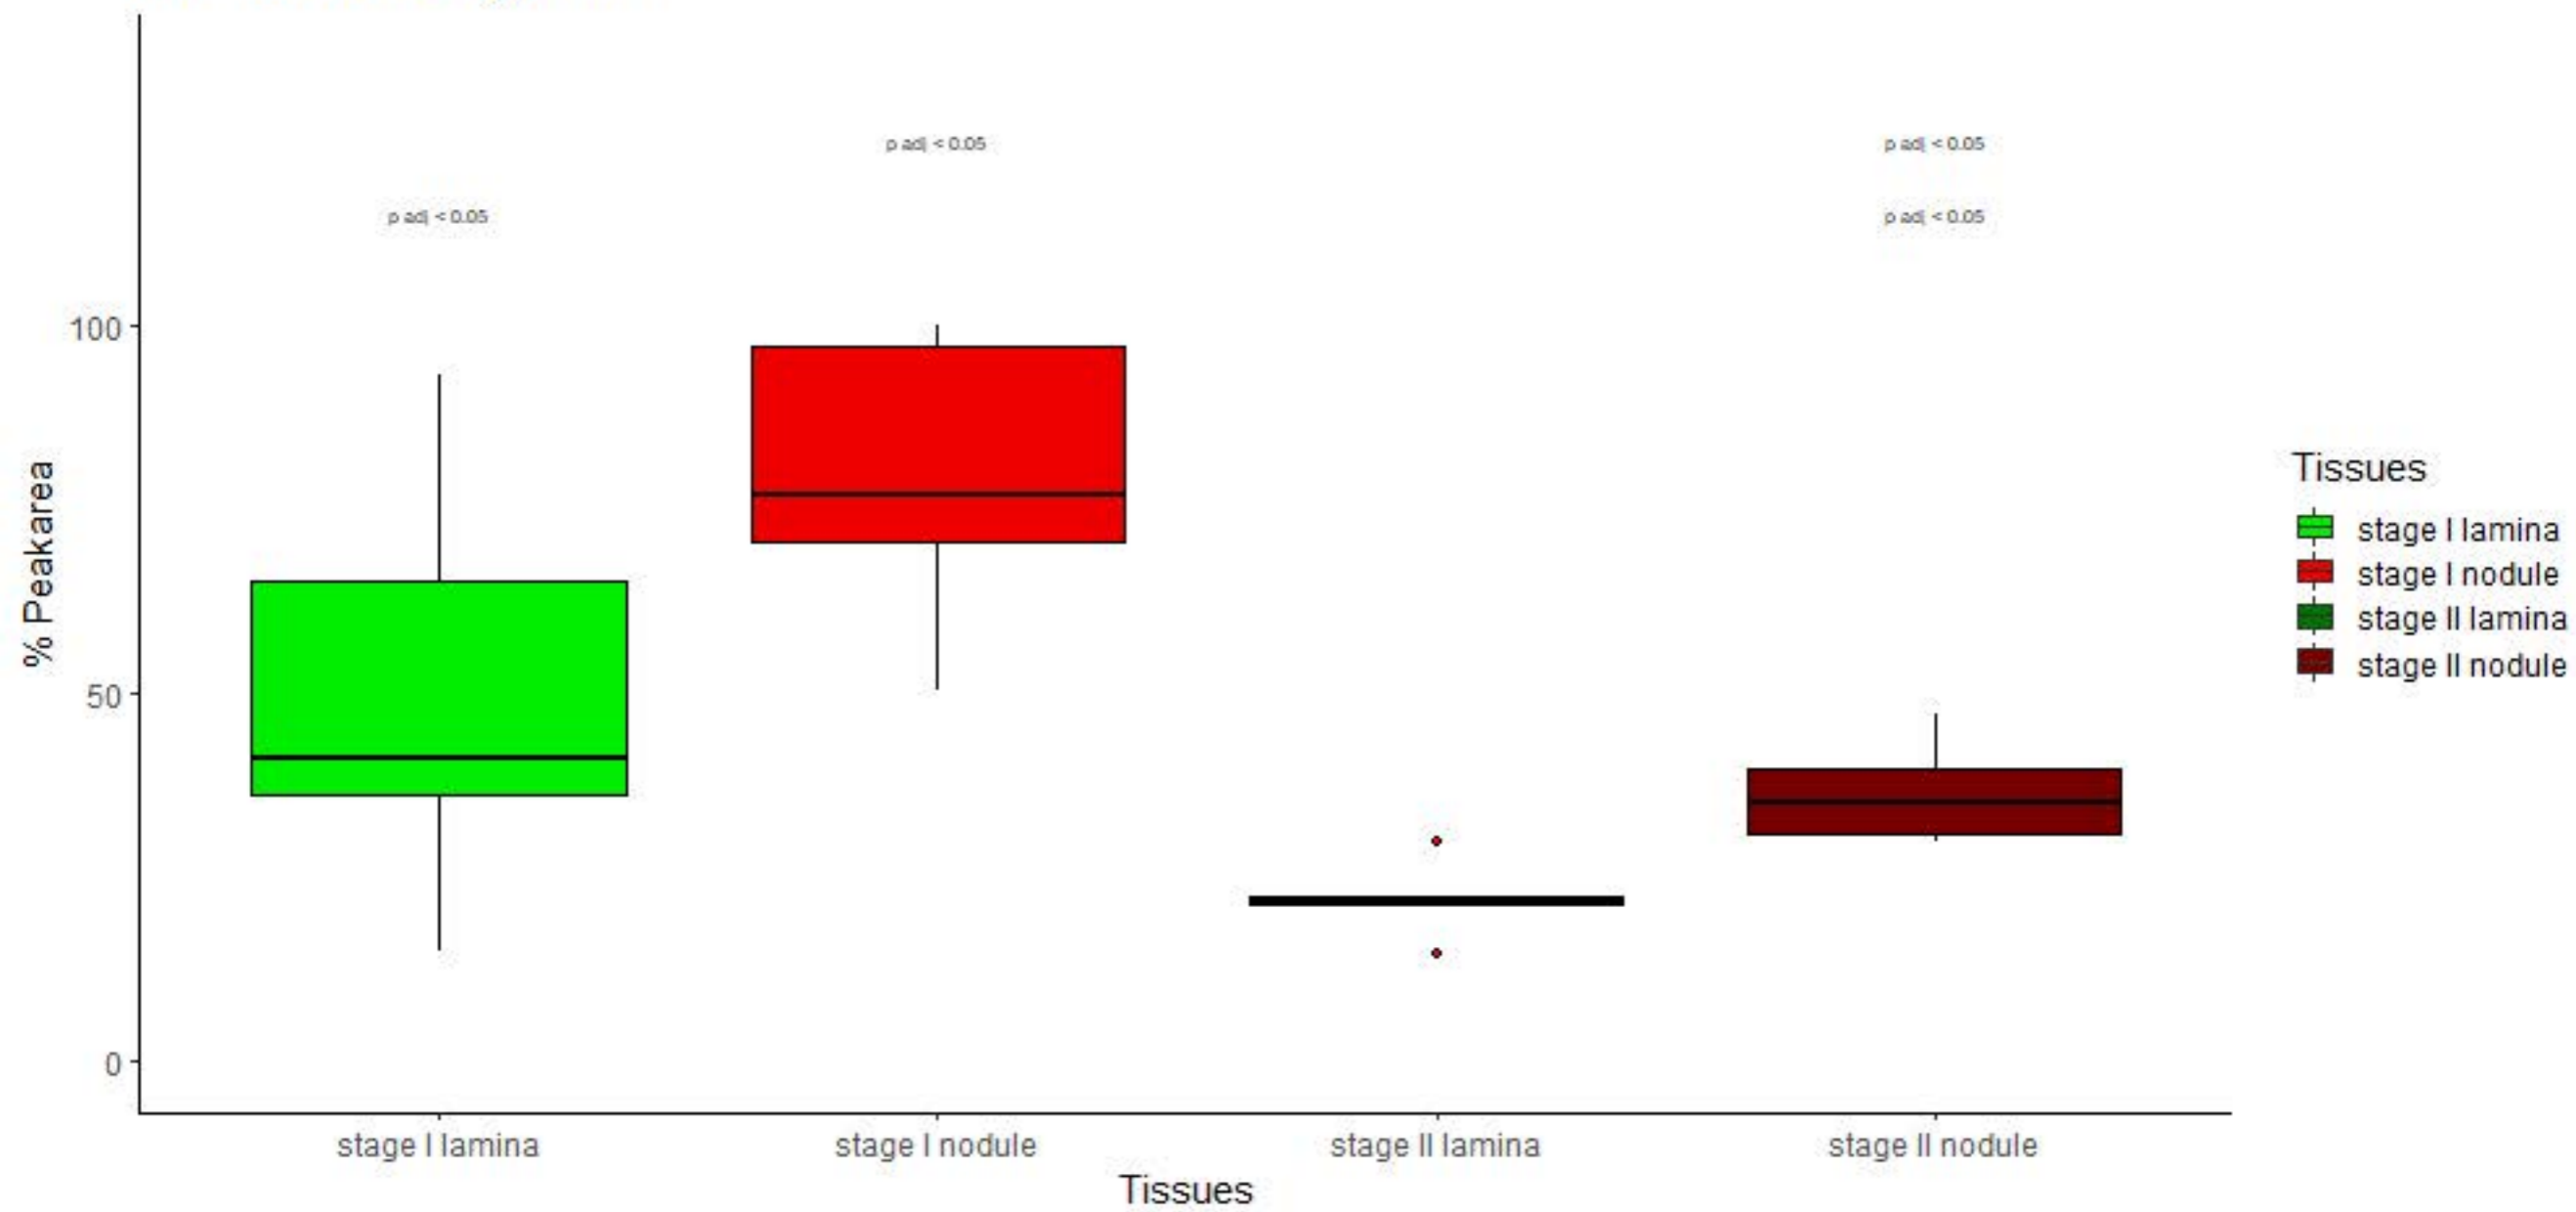



# NA 161 Carbohydrate

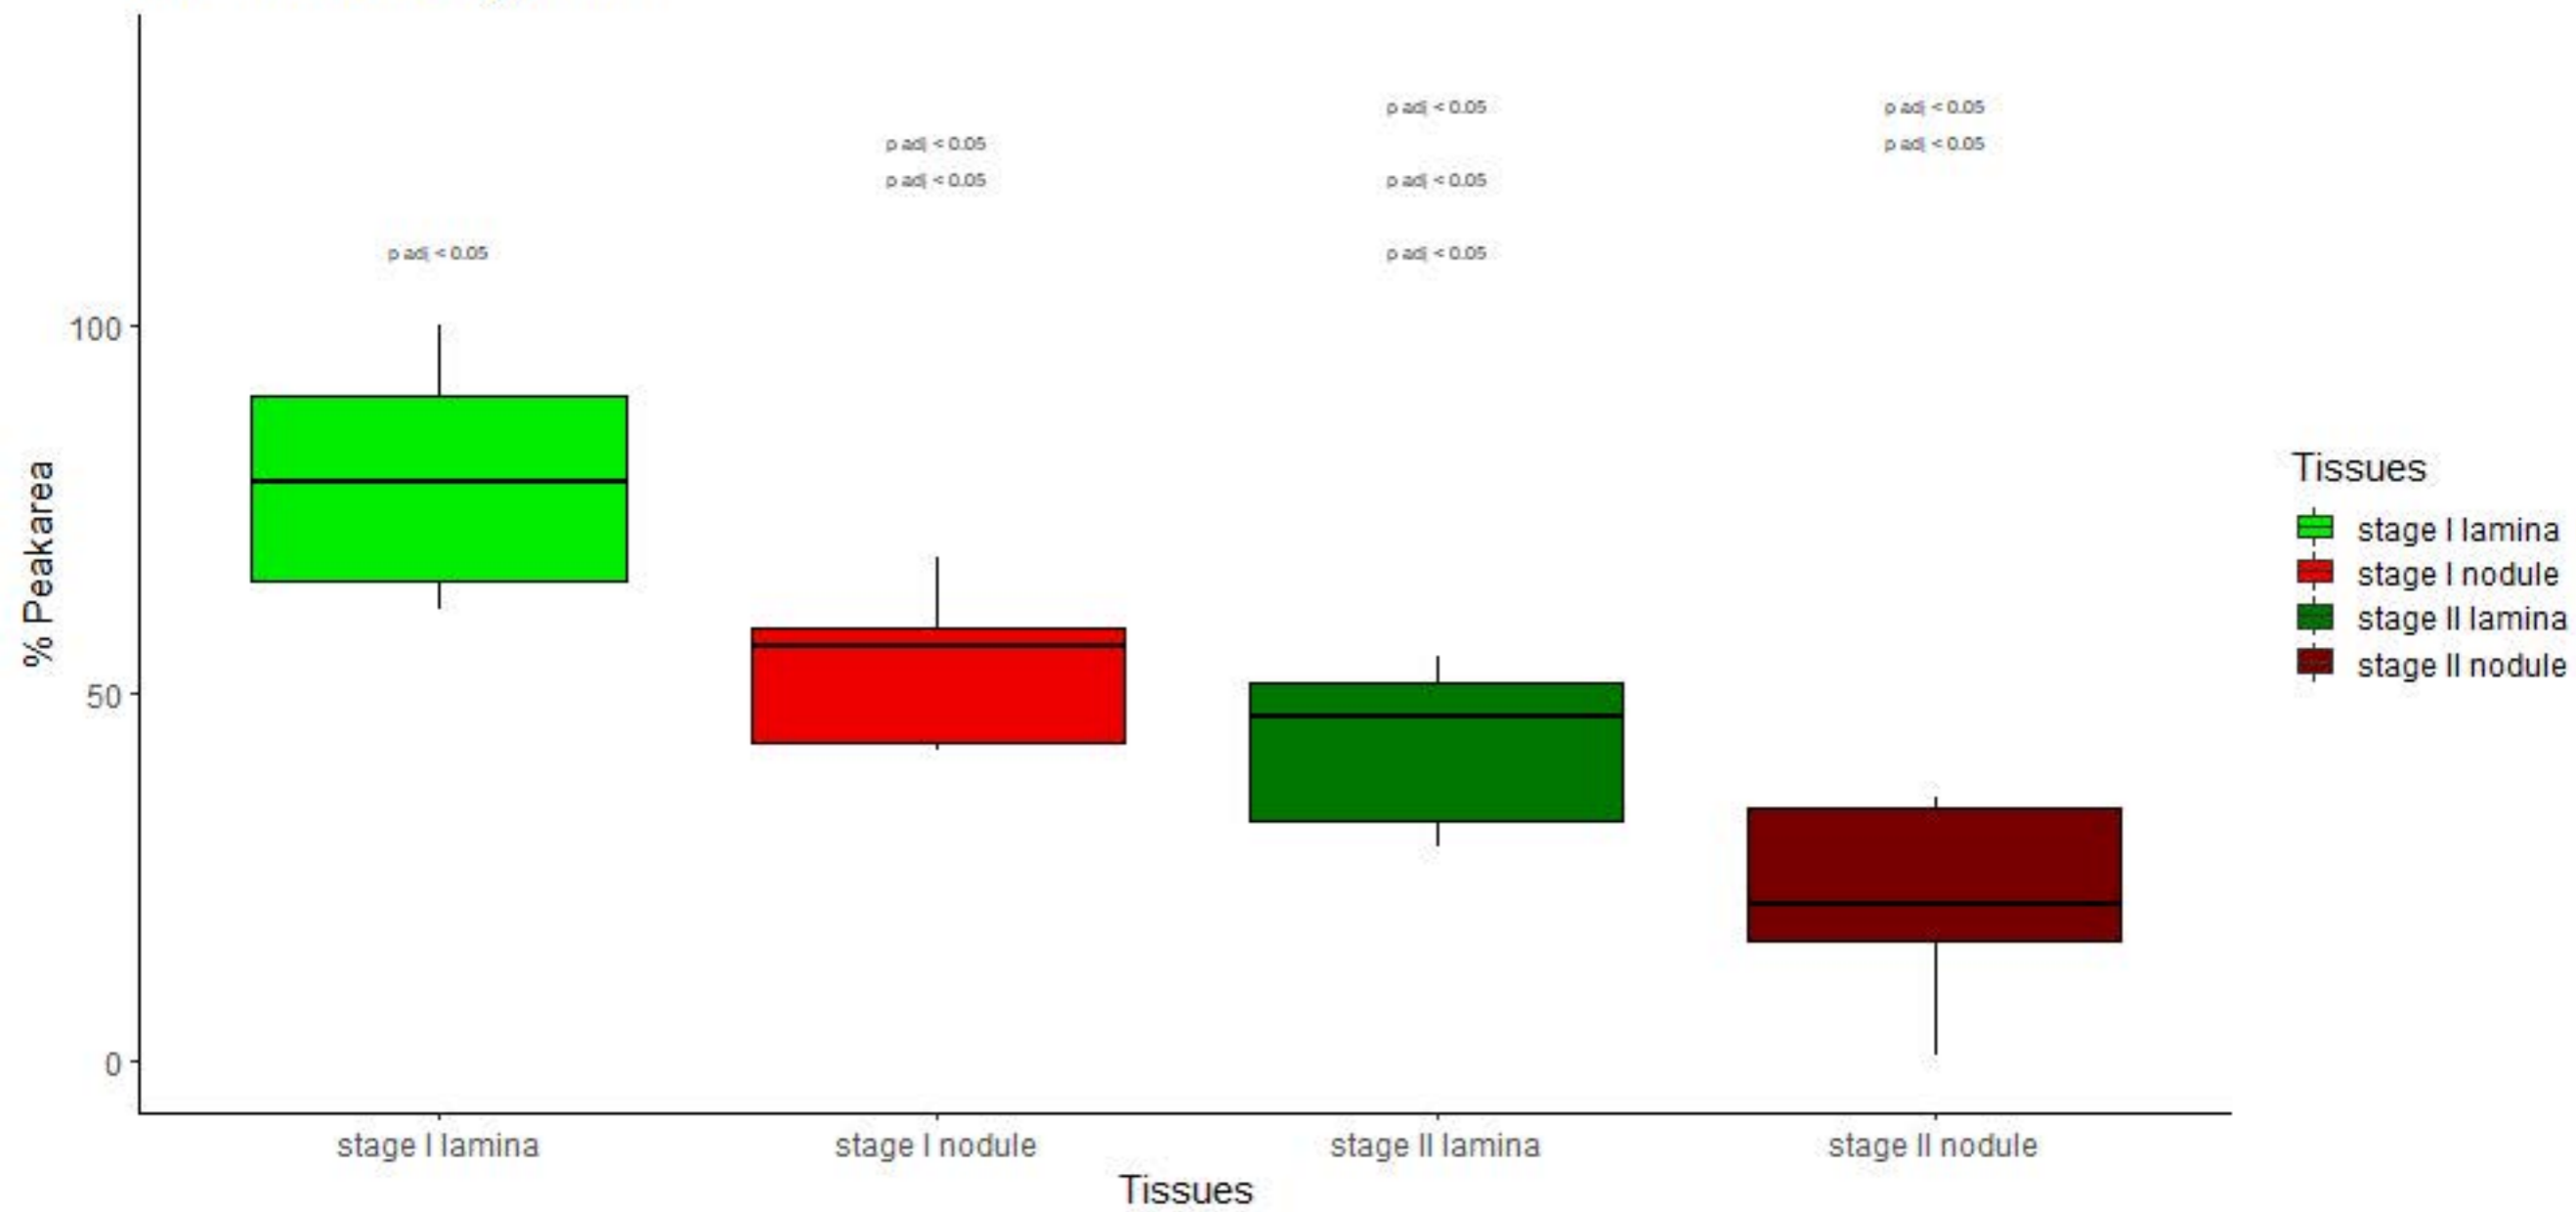

# NA 155 Carbohydrate

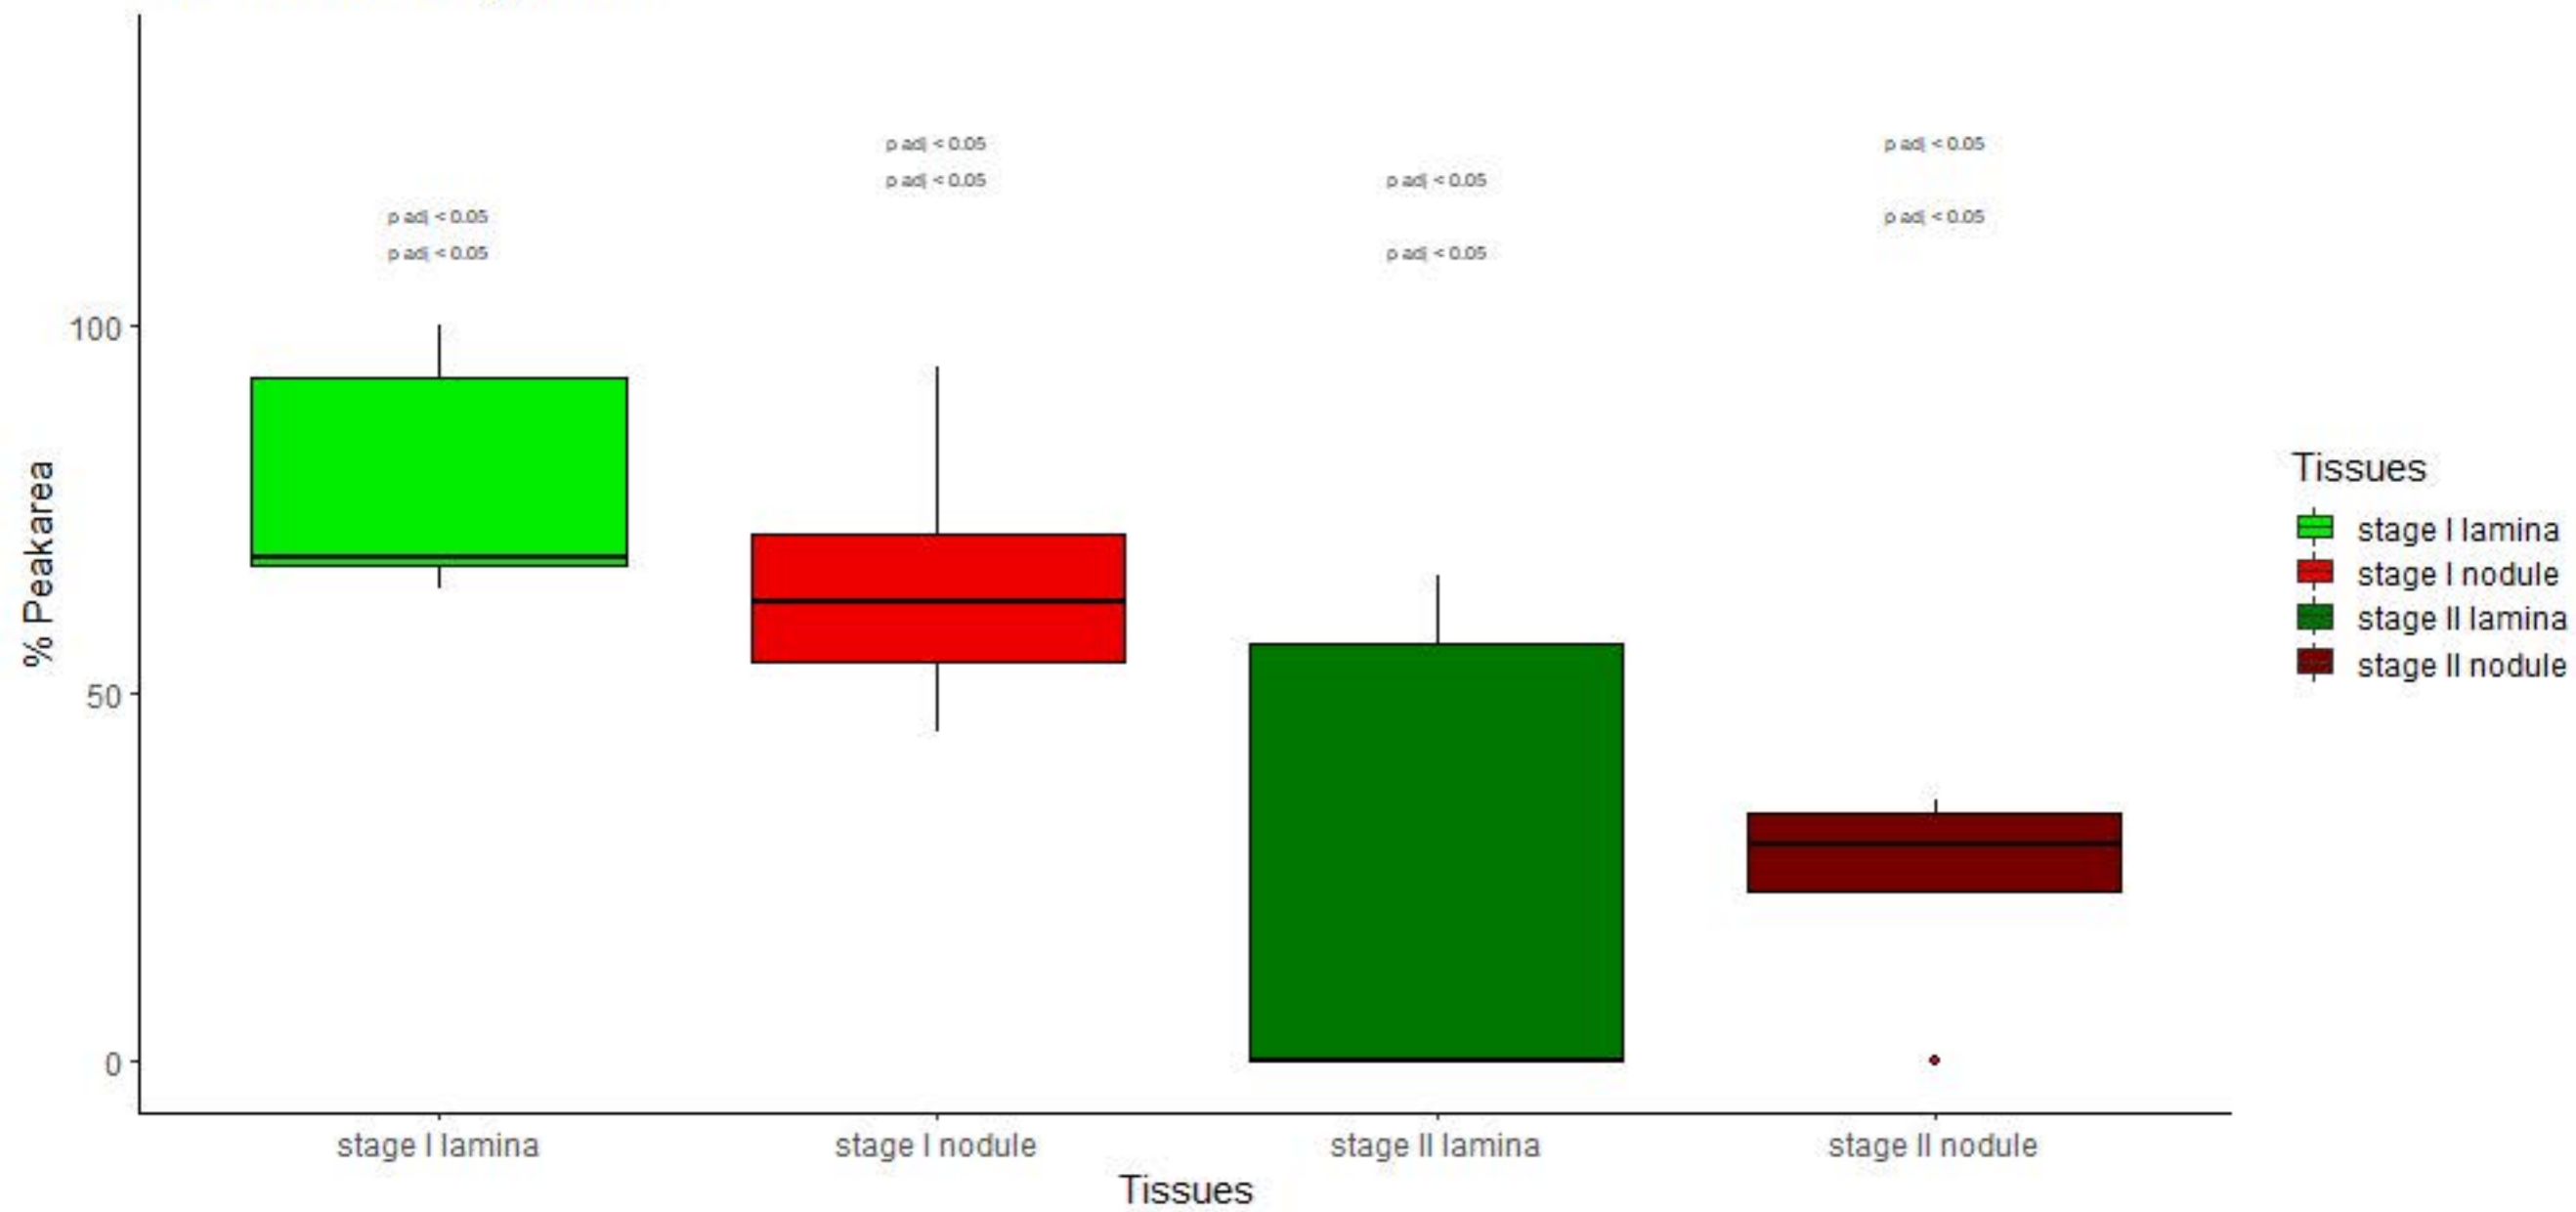

# NA 158 Carbohydrate

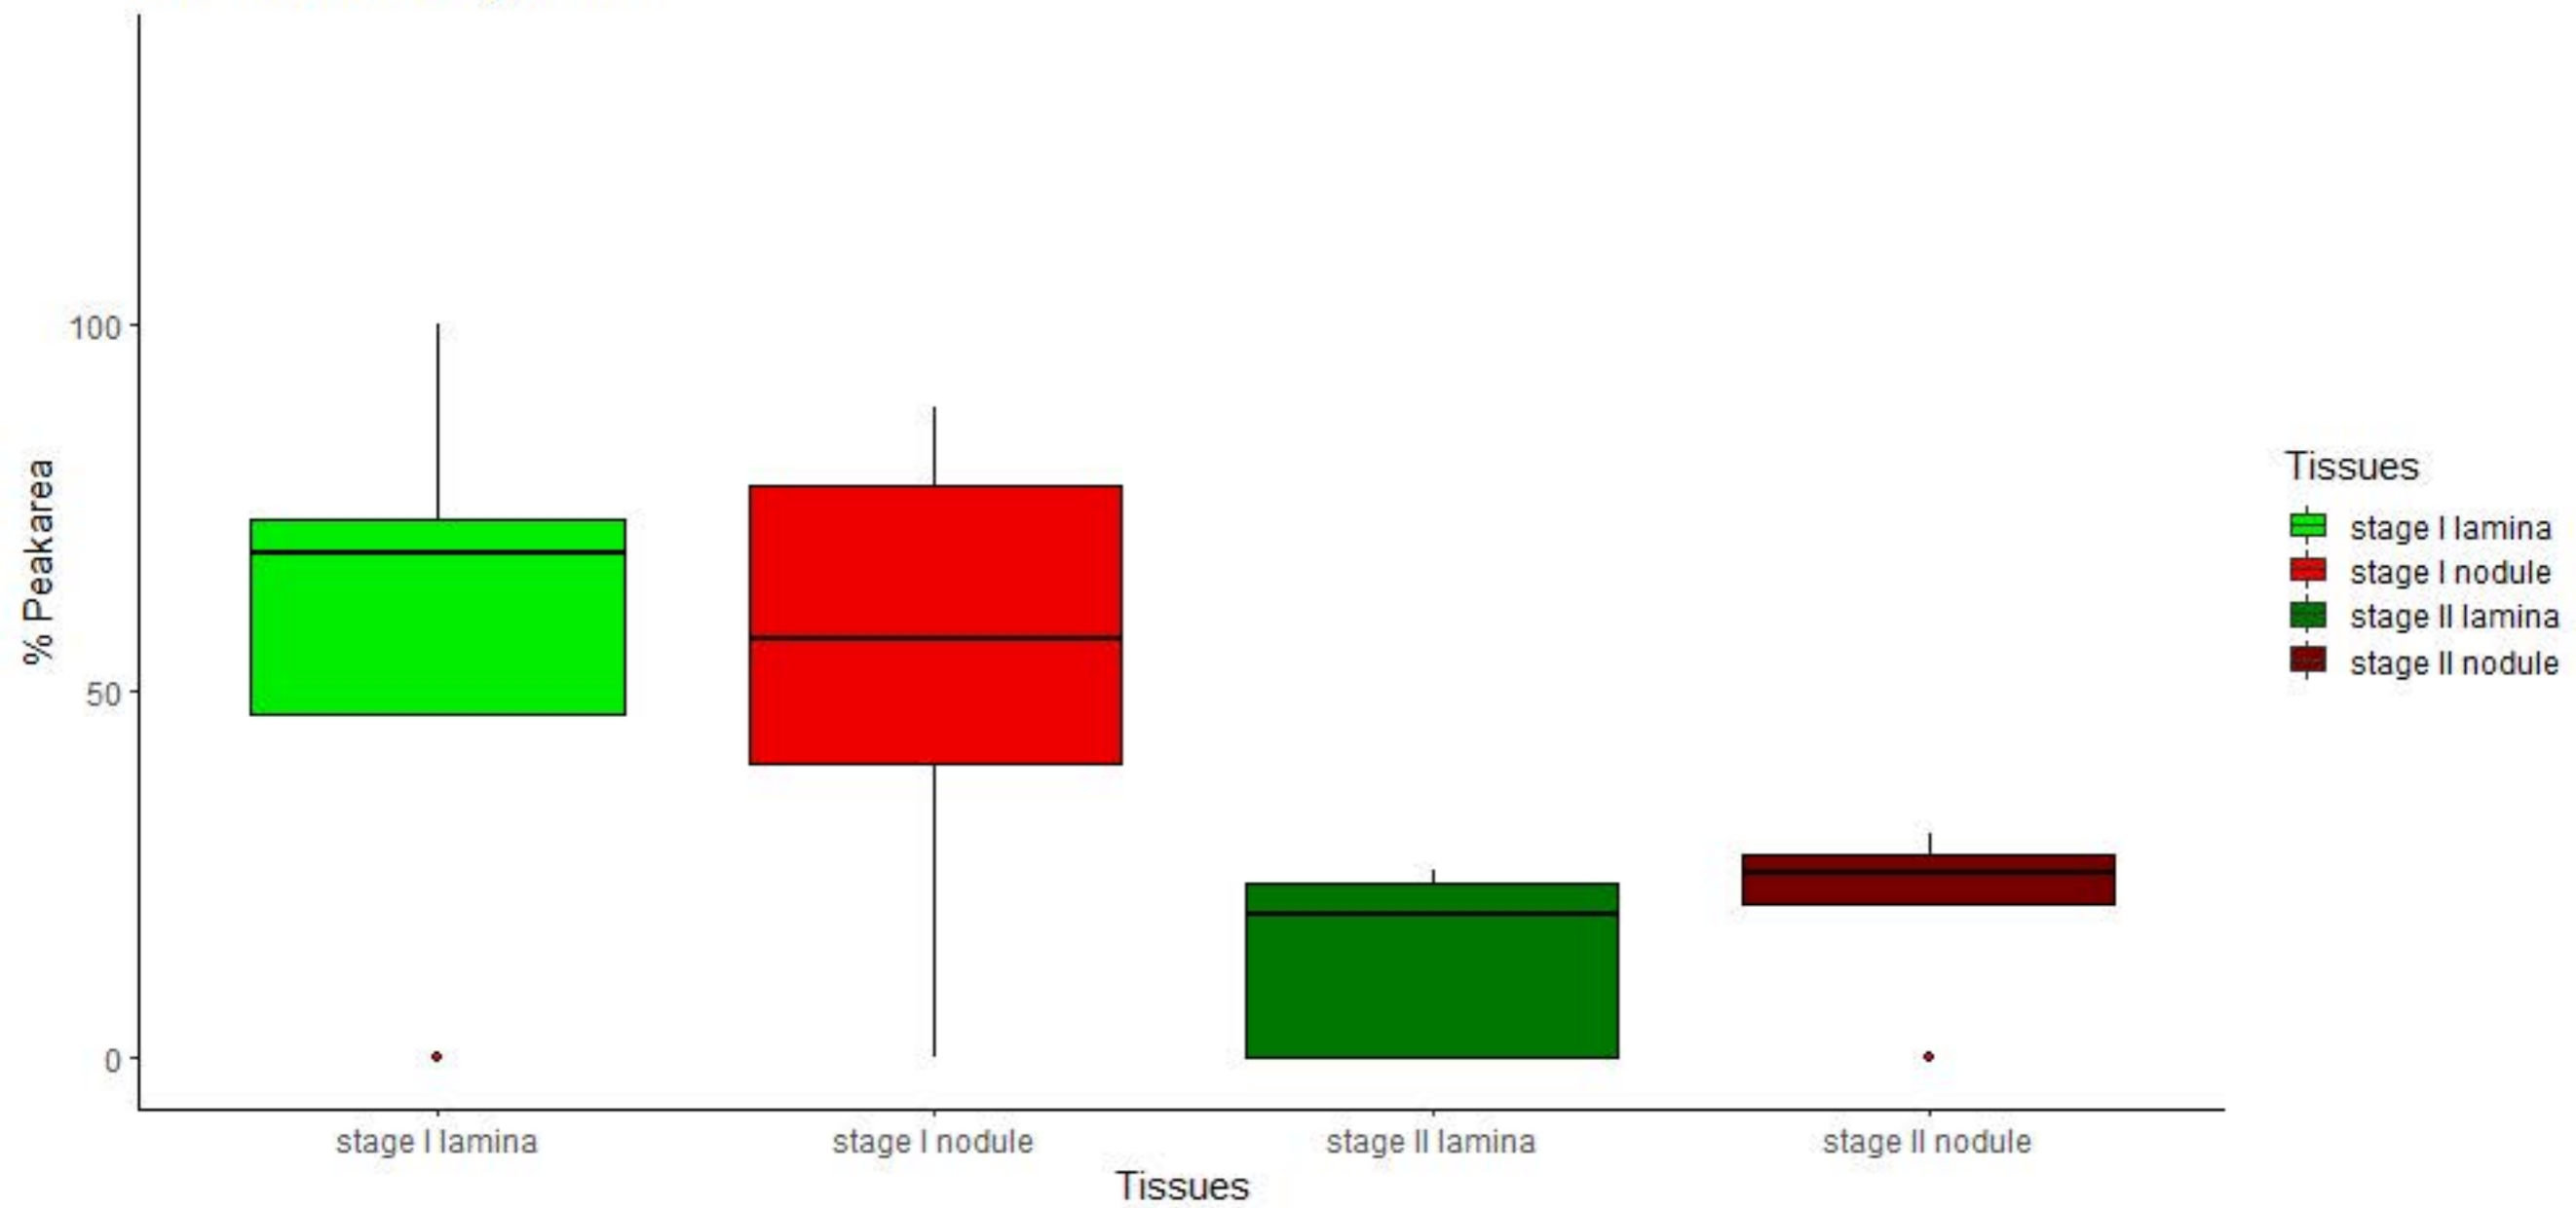

# NA 160 Carbohydrate

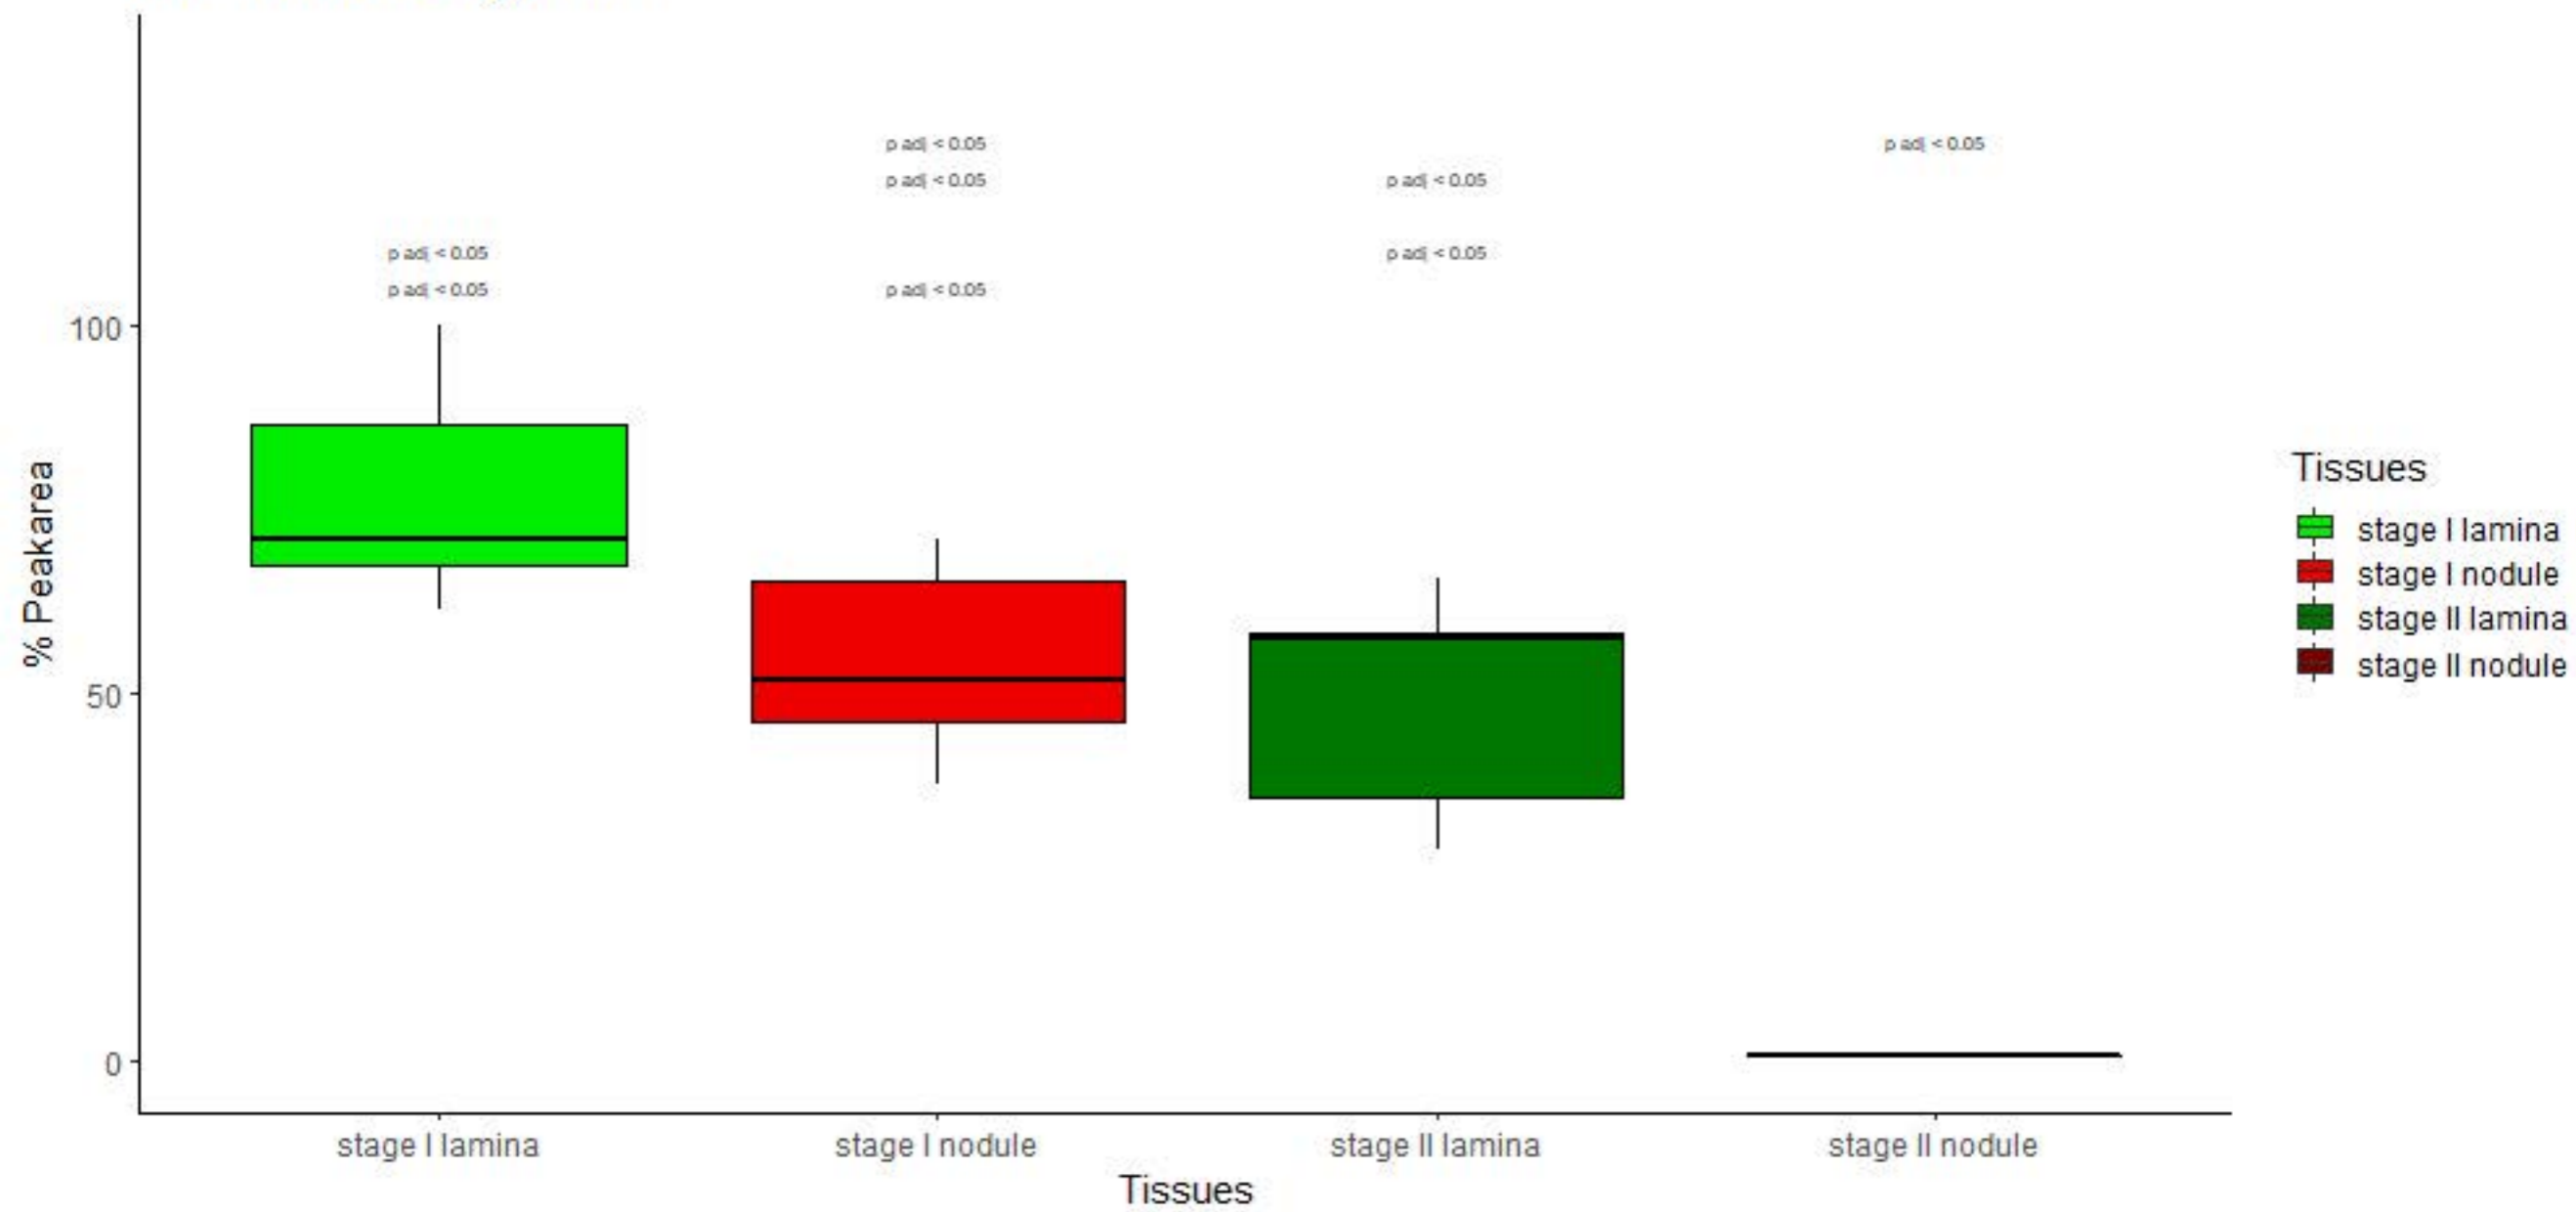

# NA 166 Carbohydrate

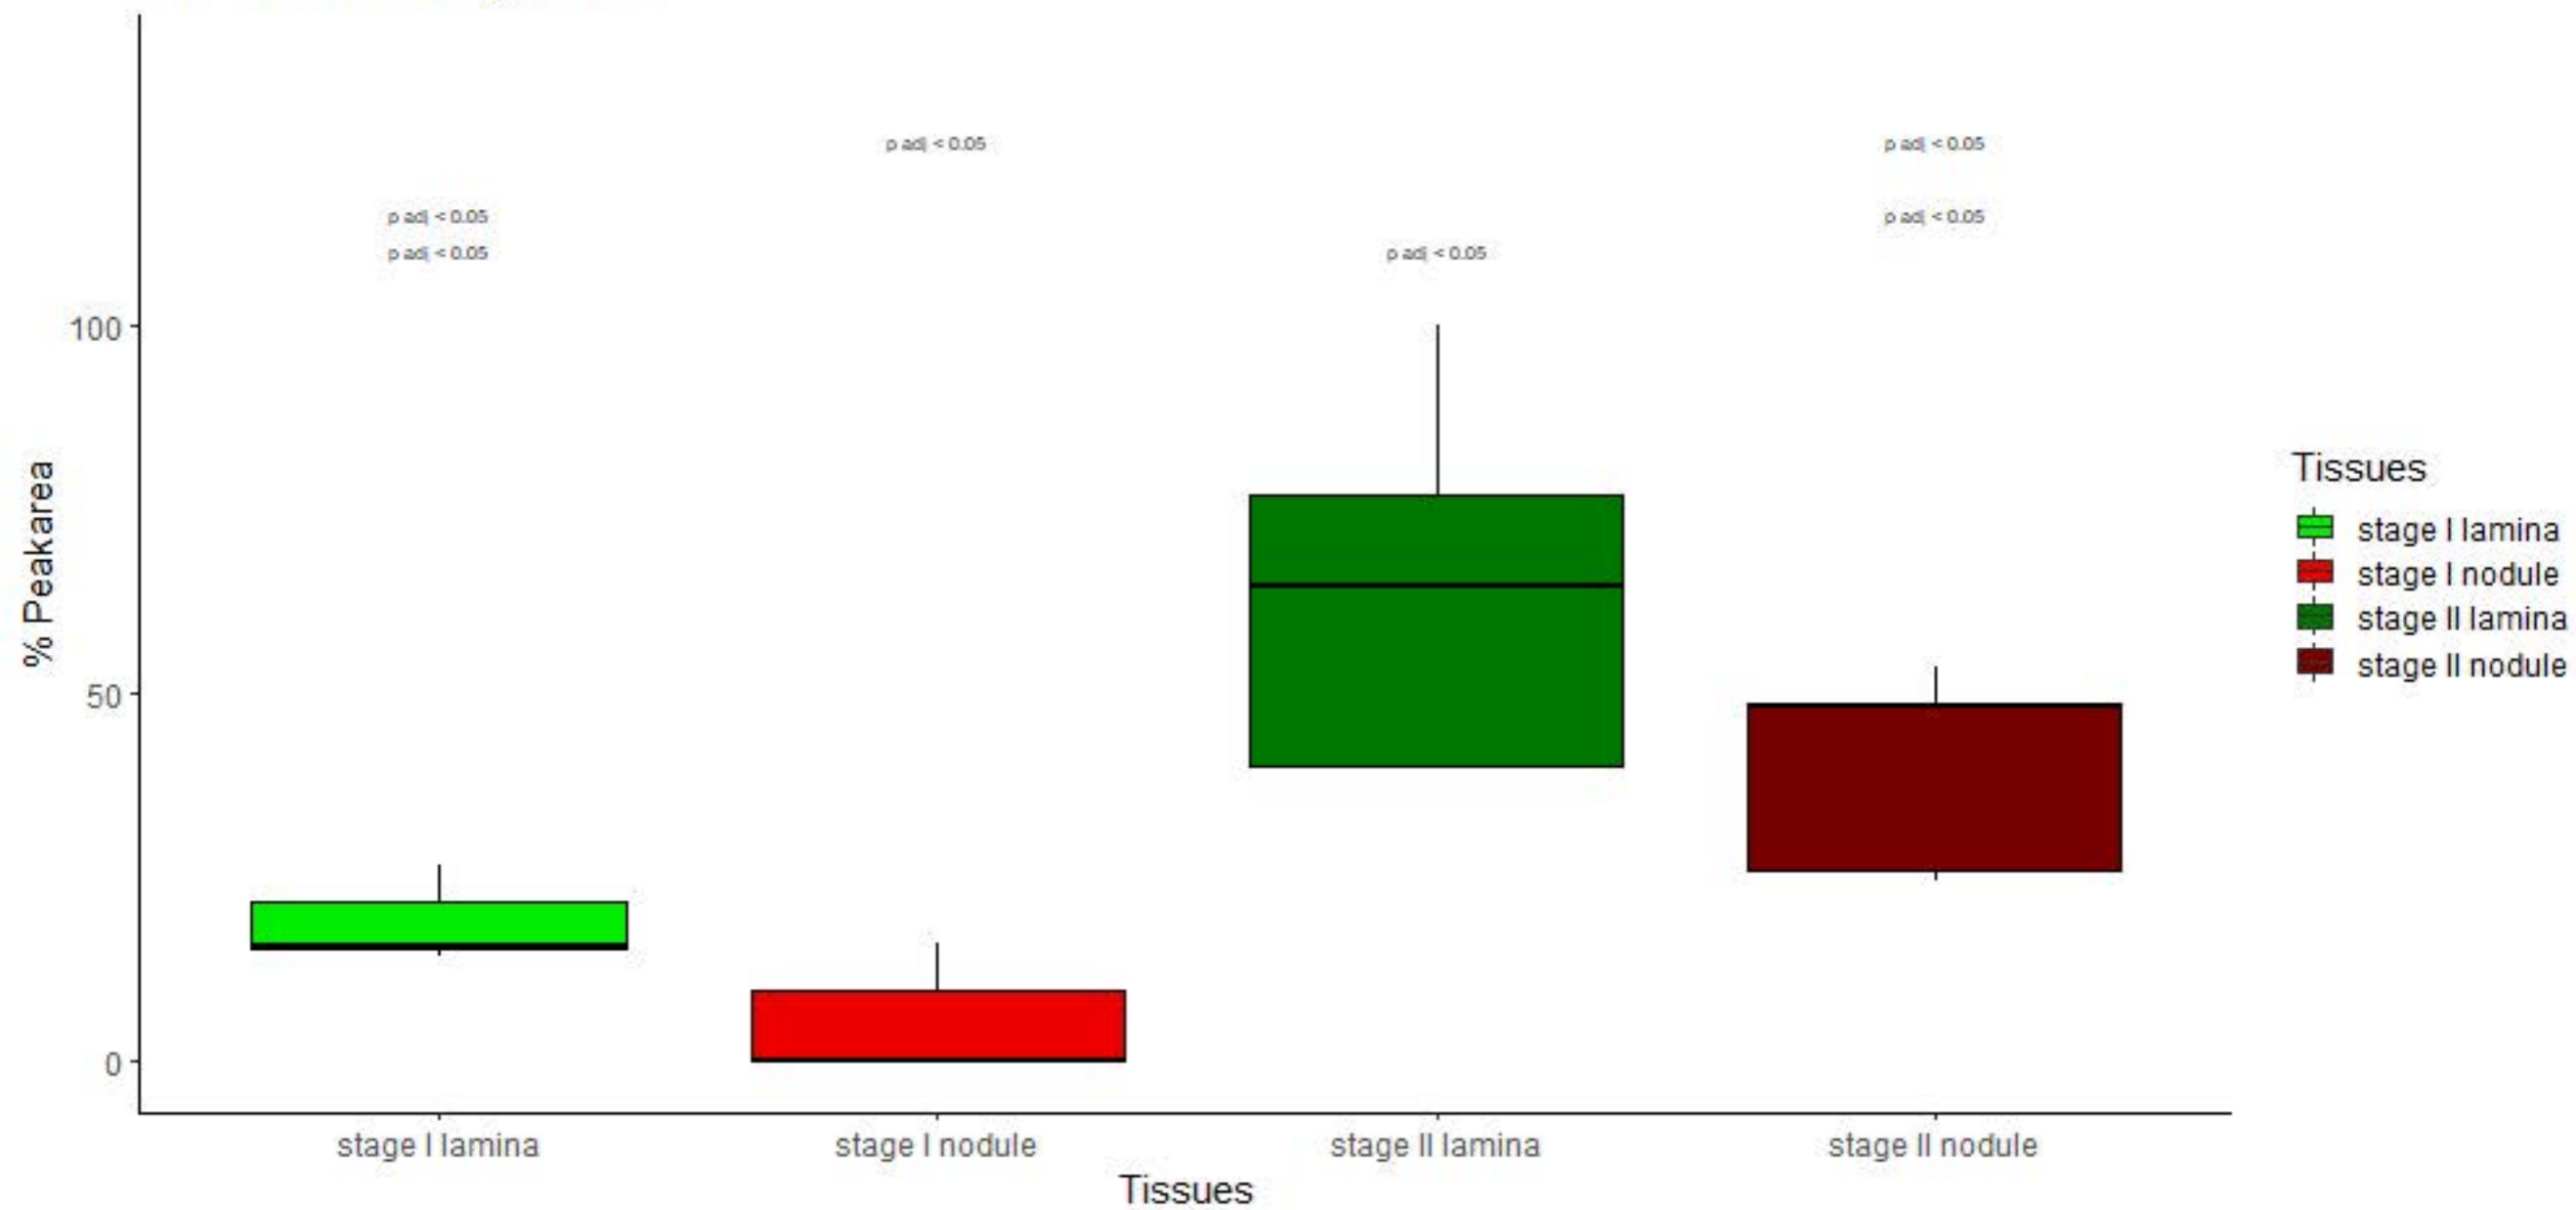

# NA\_Carbohydrate 177

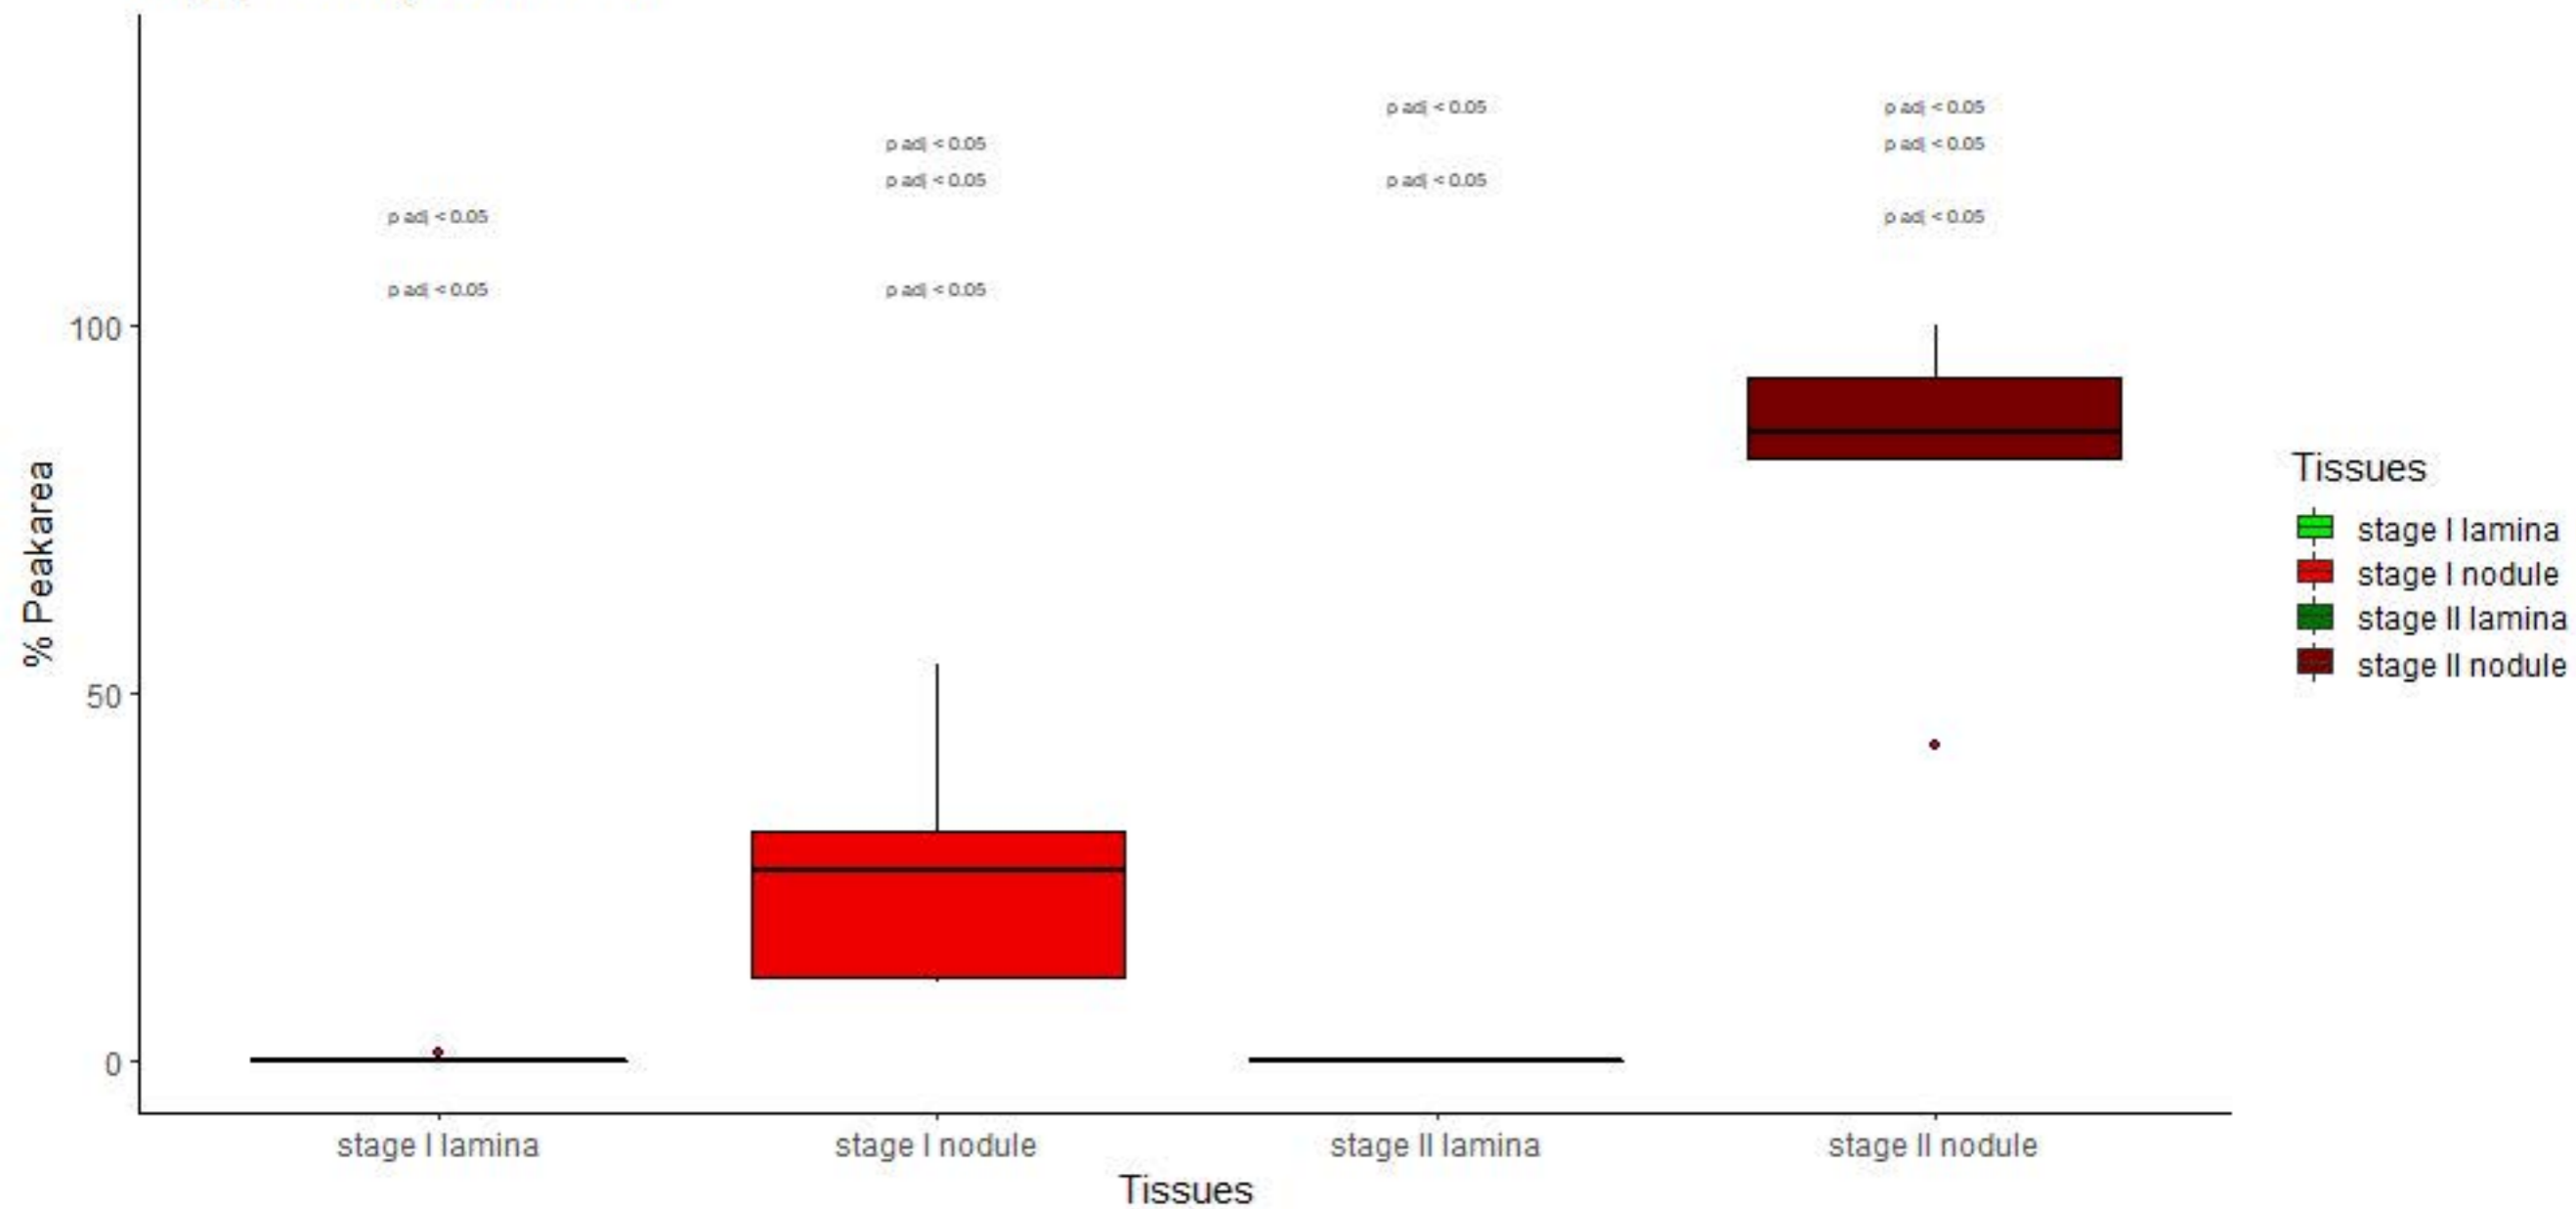

# NA Carbohydrate 43

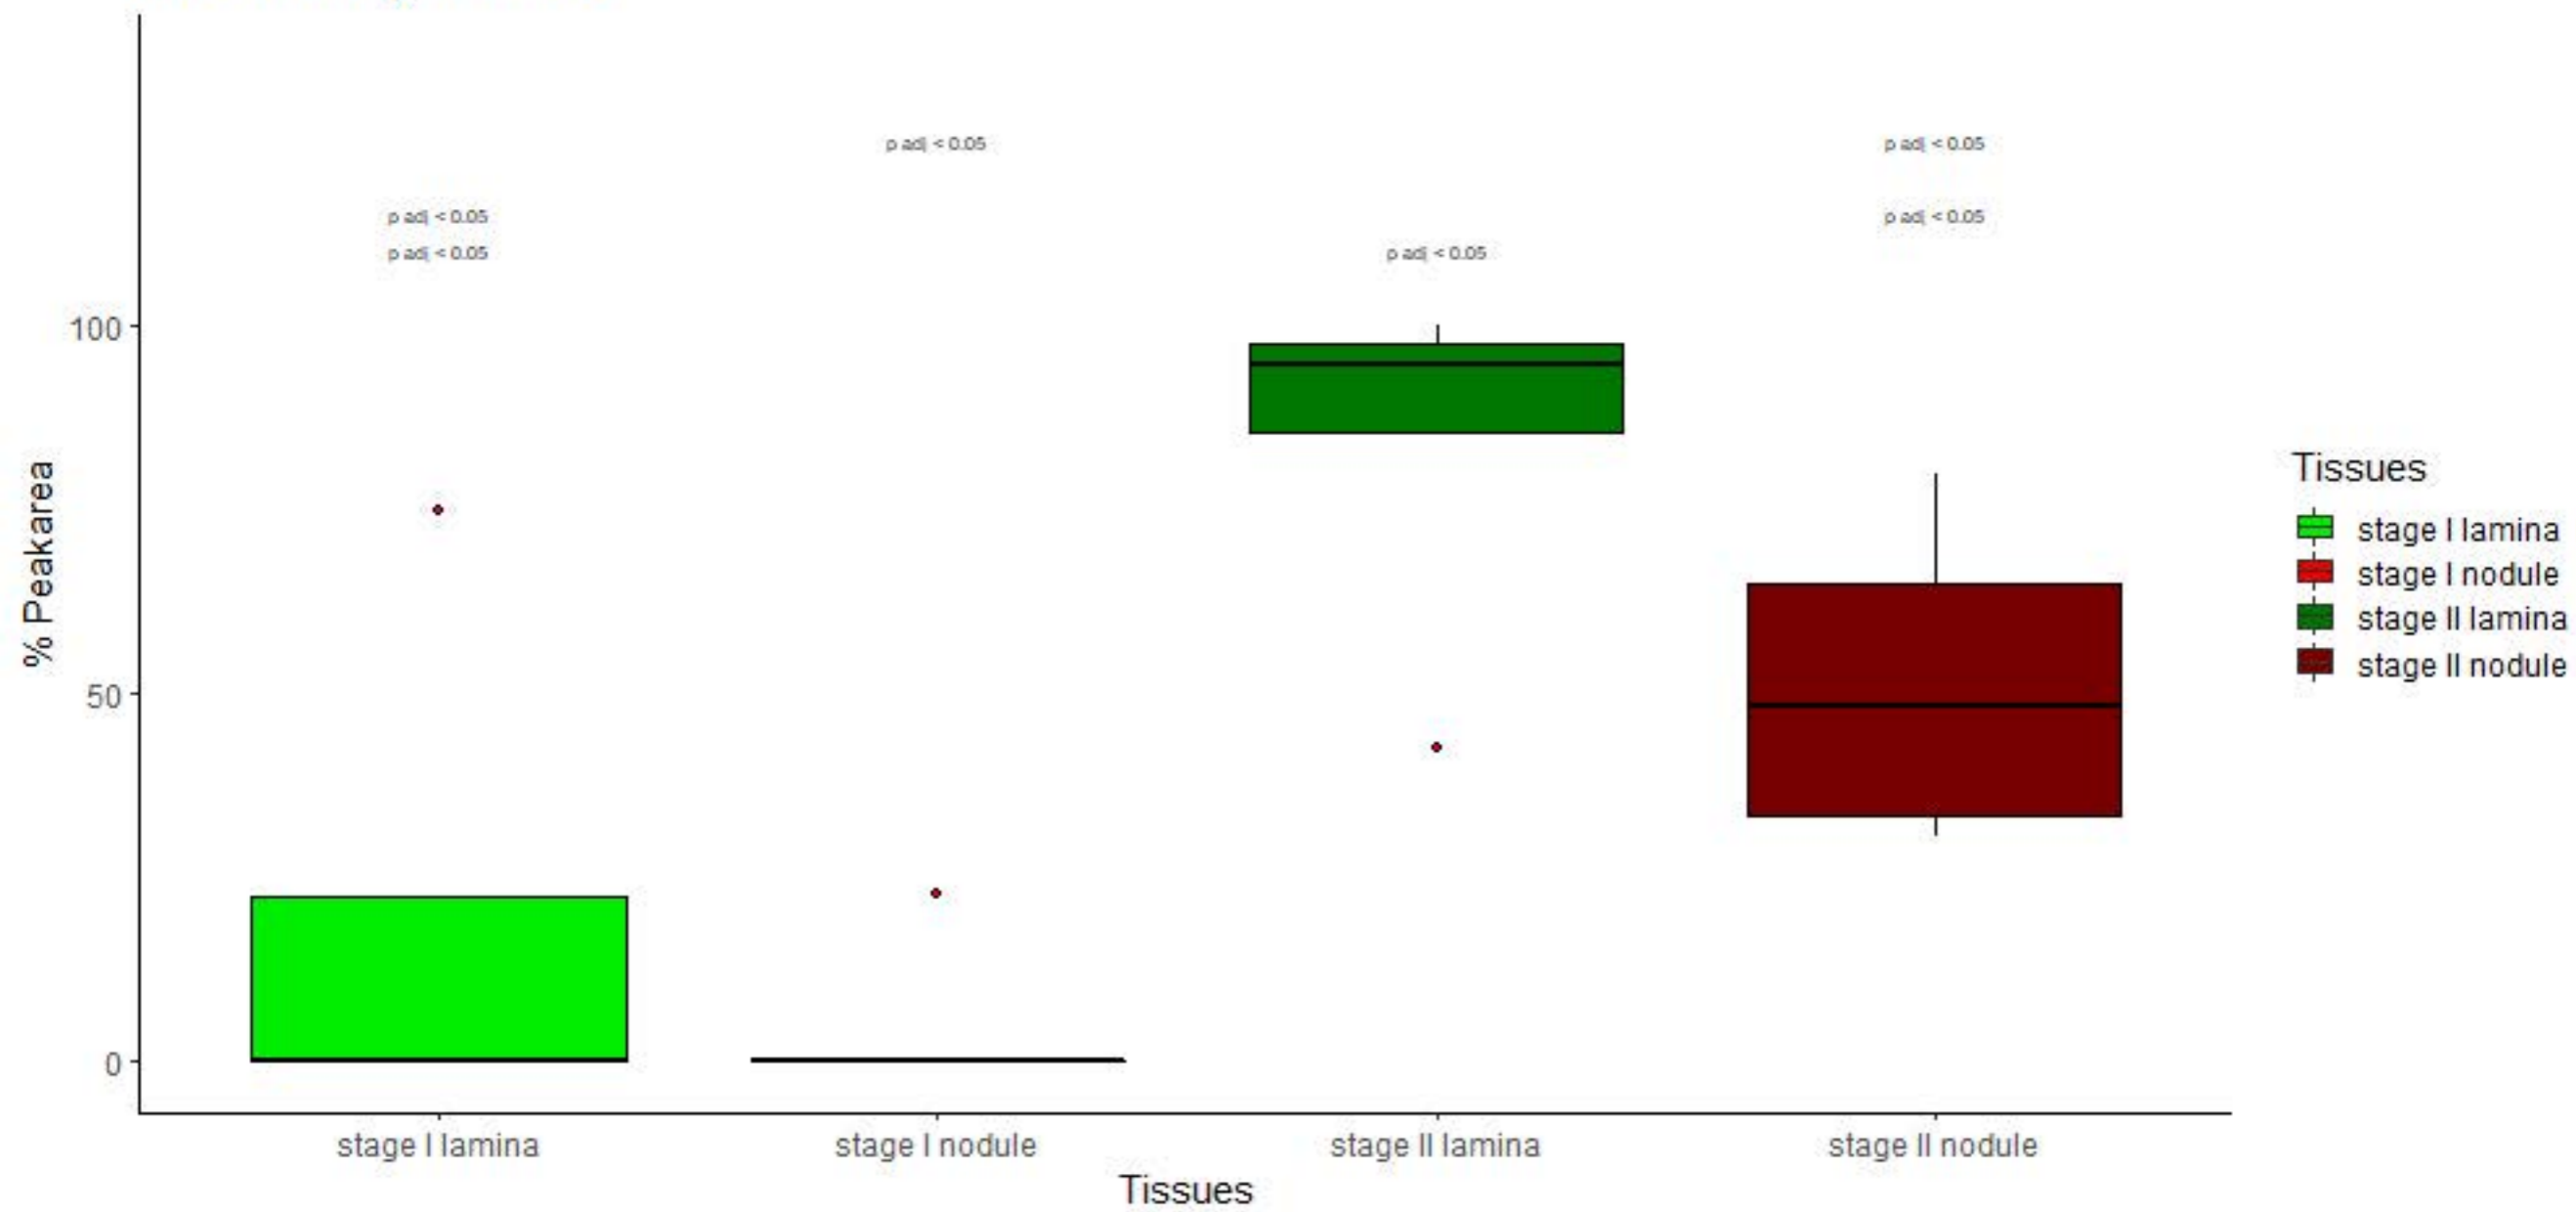

# NA Carboydrate 137

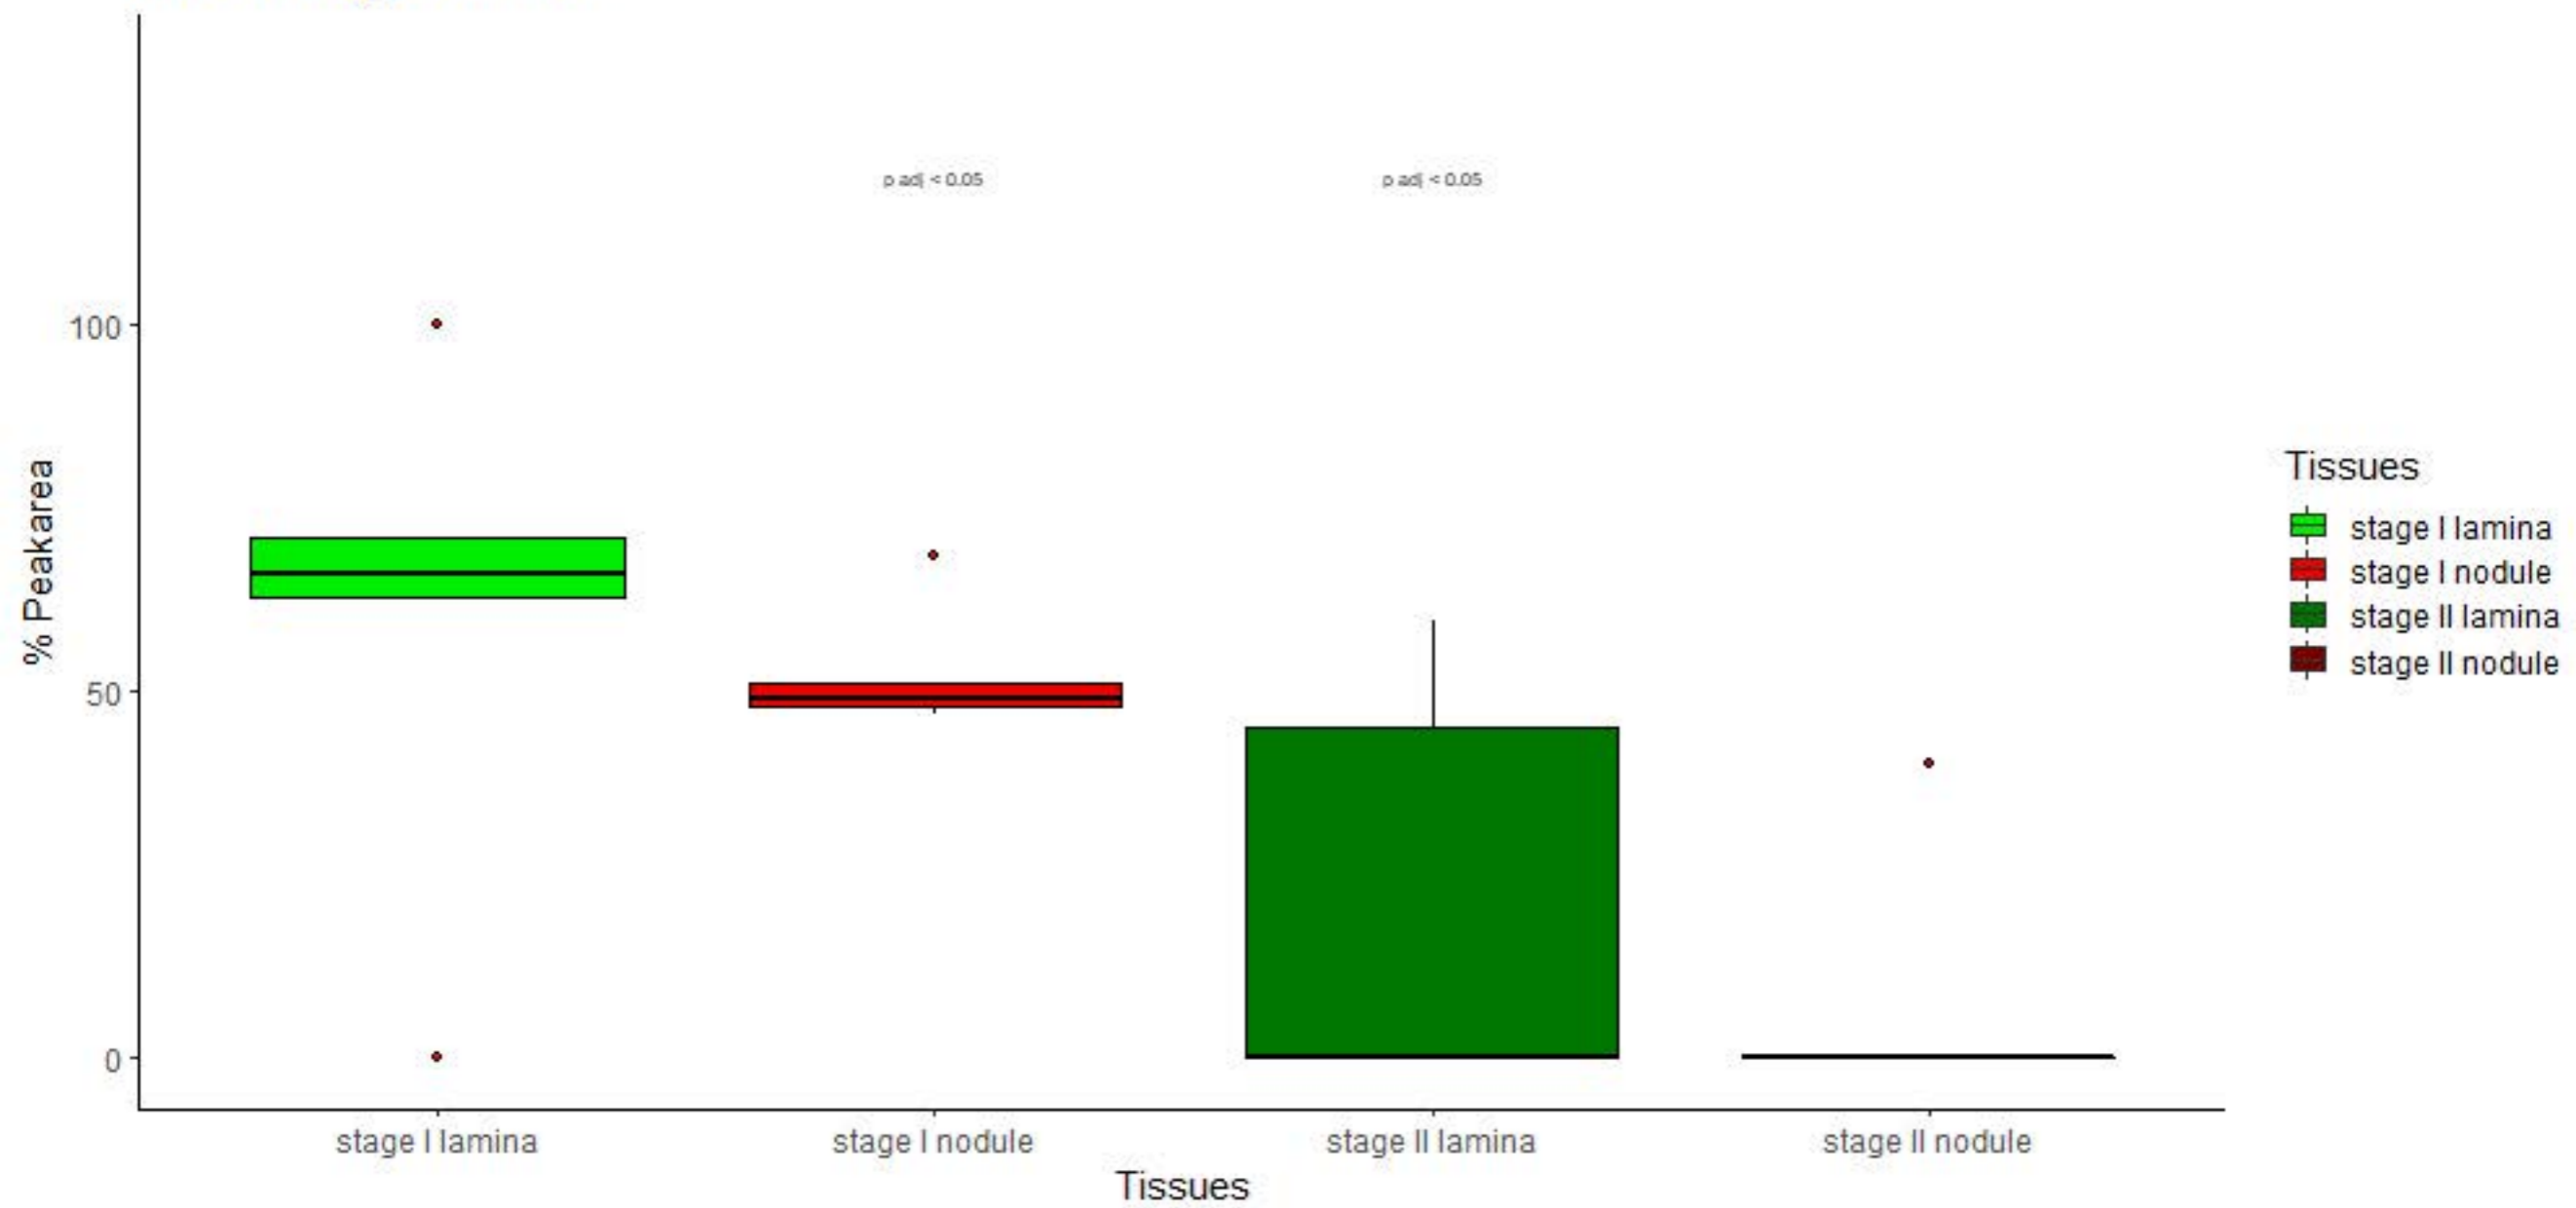



# NA Polysaccharide 145 (??Maltotriose (1MEOX) (11TMS))

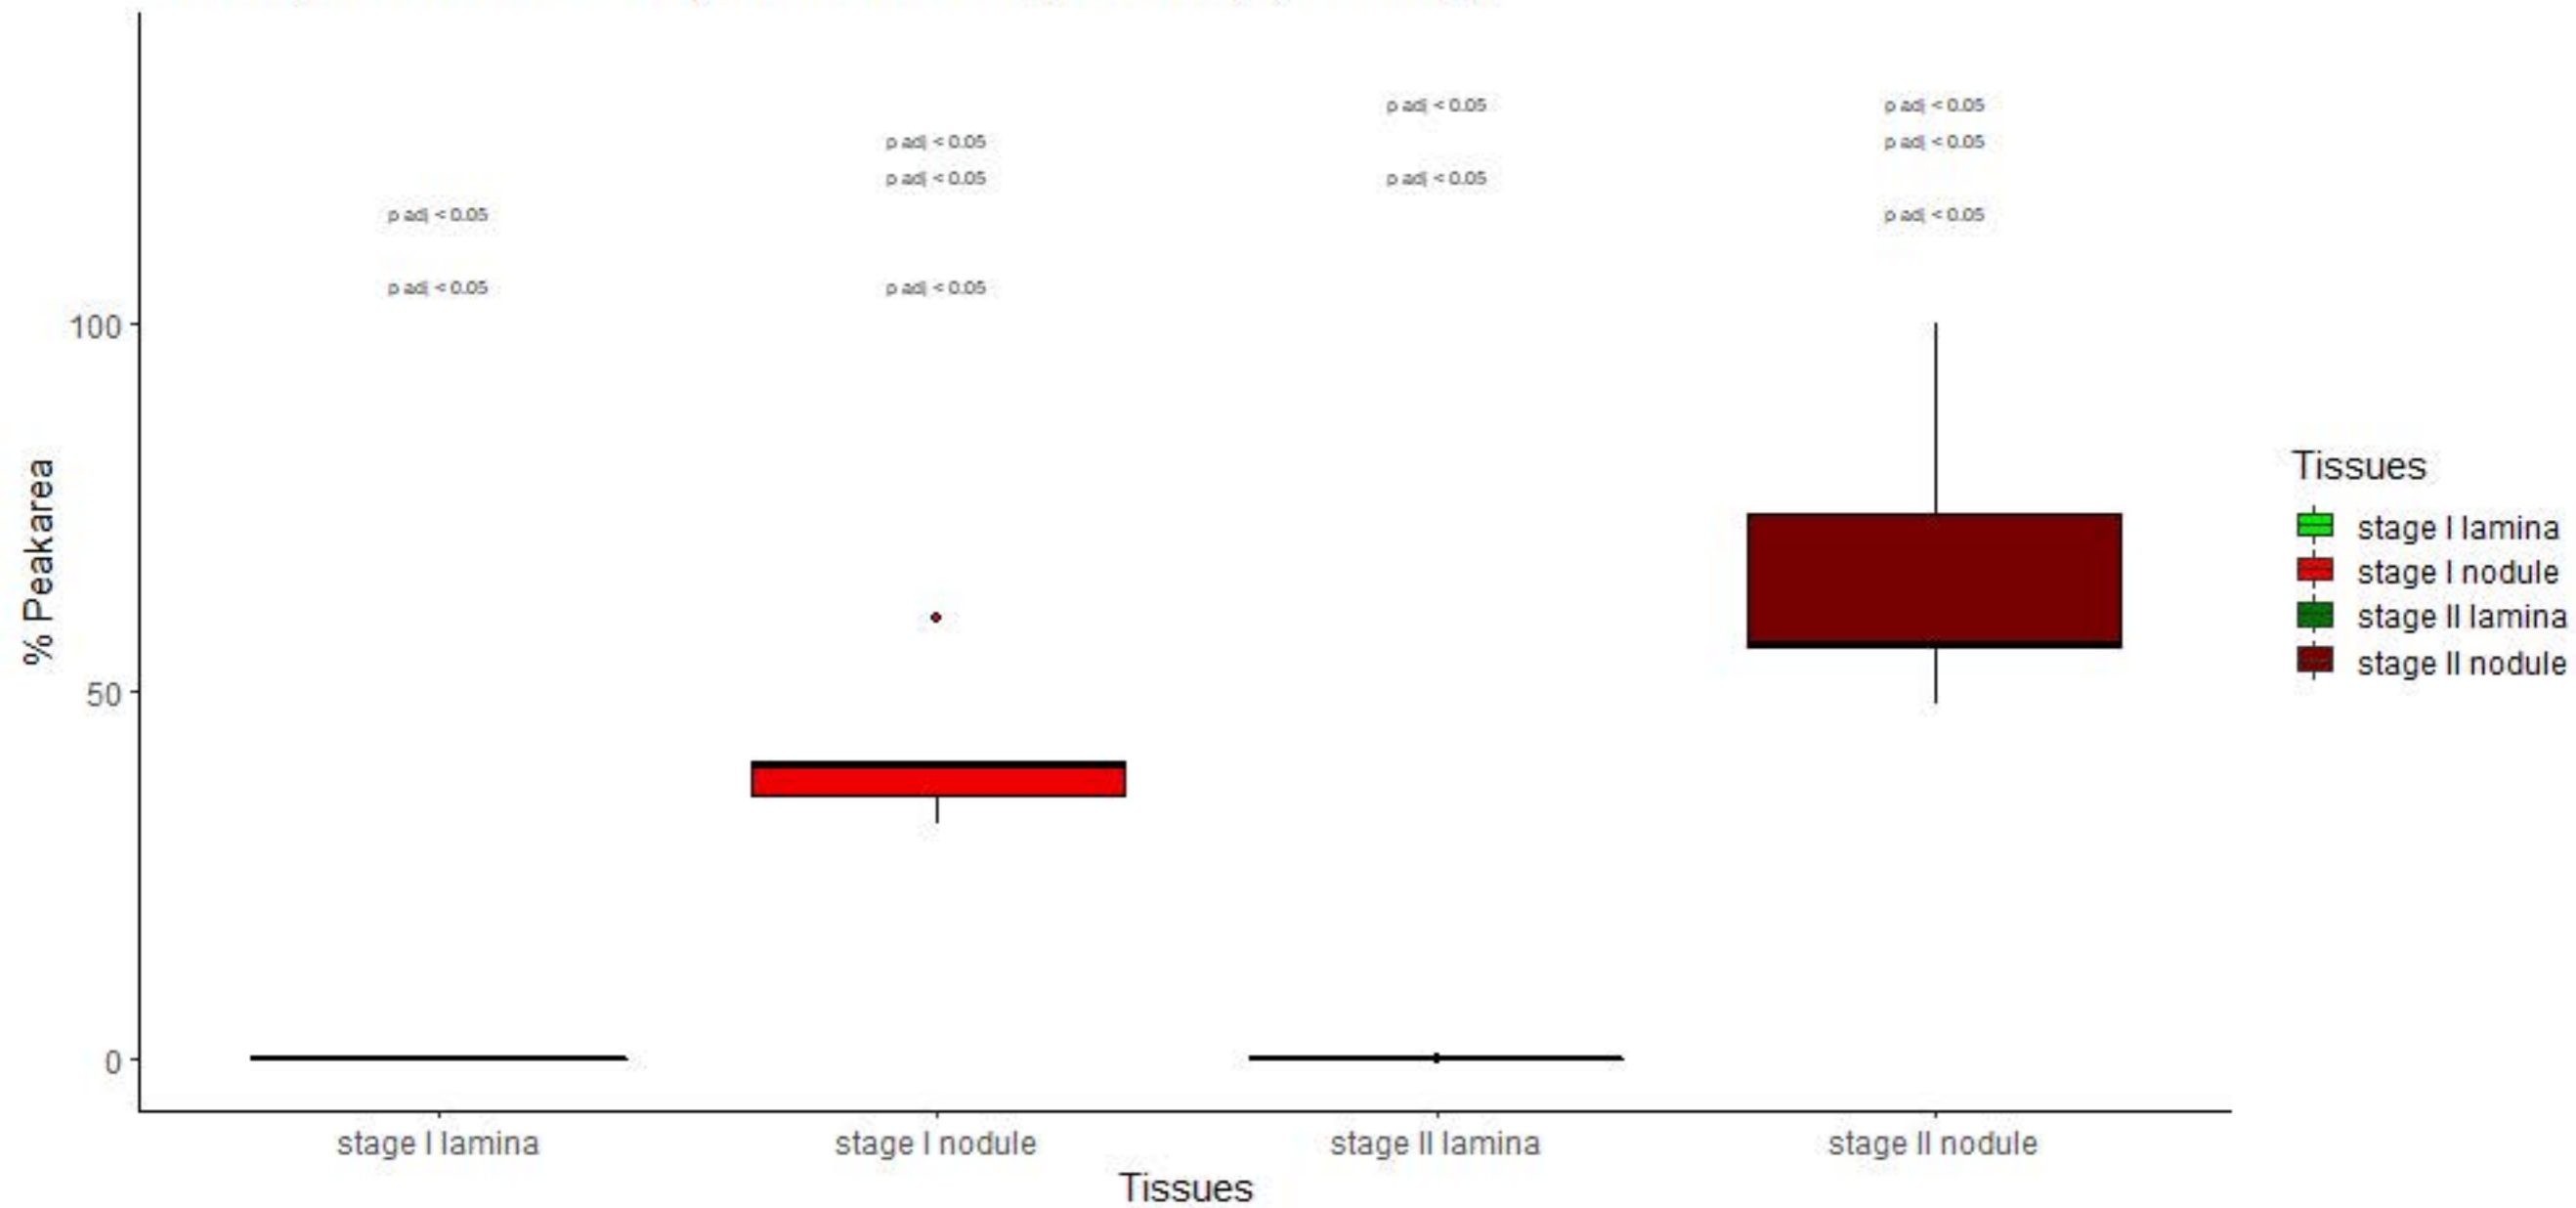

# NA Sugar alcohol 175

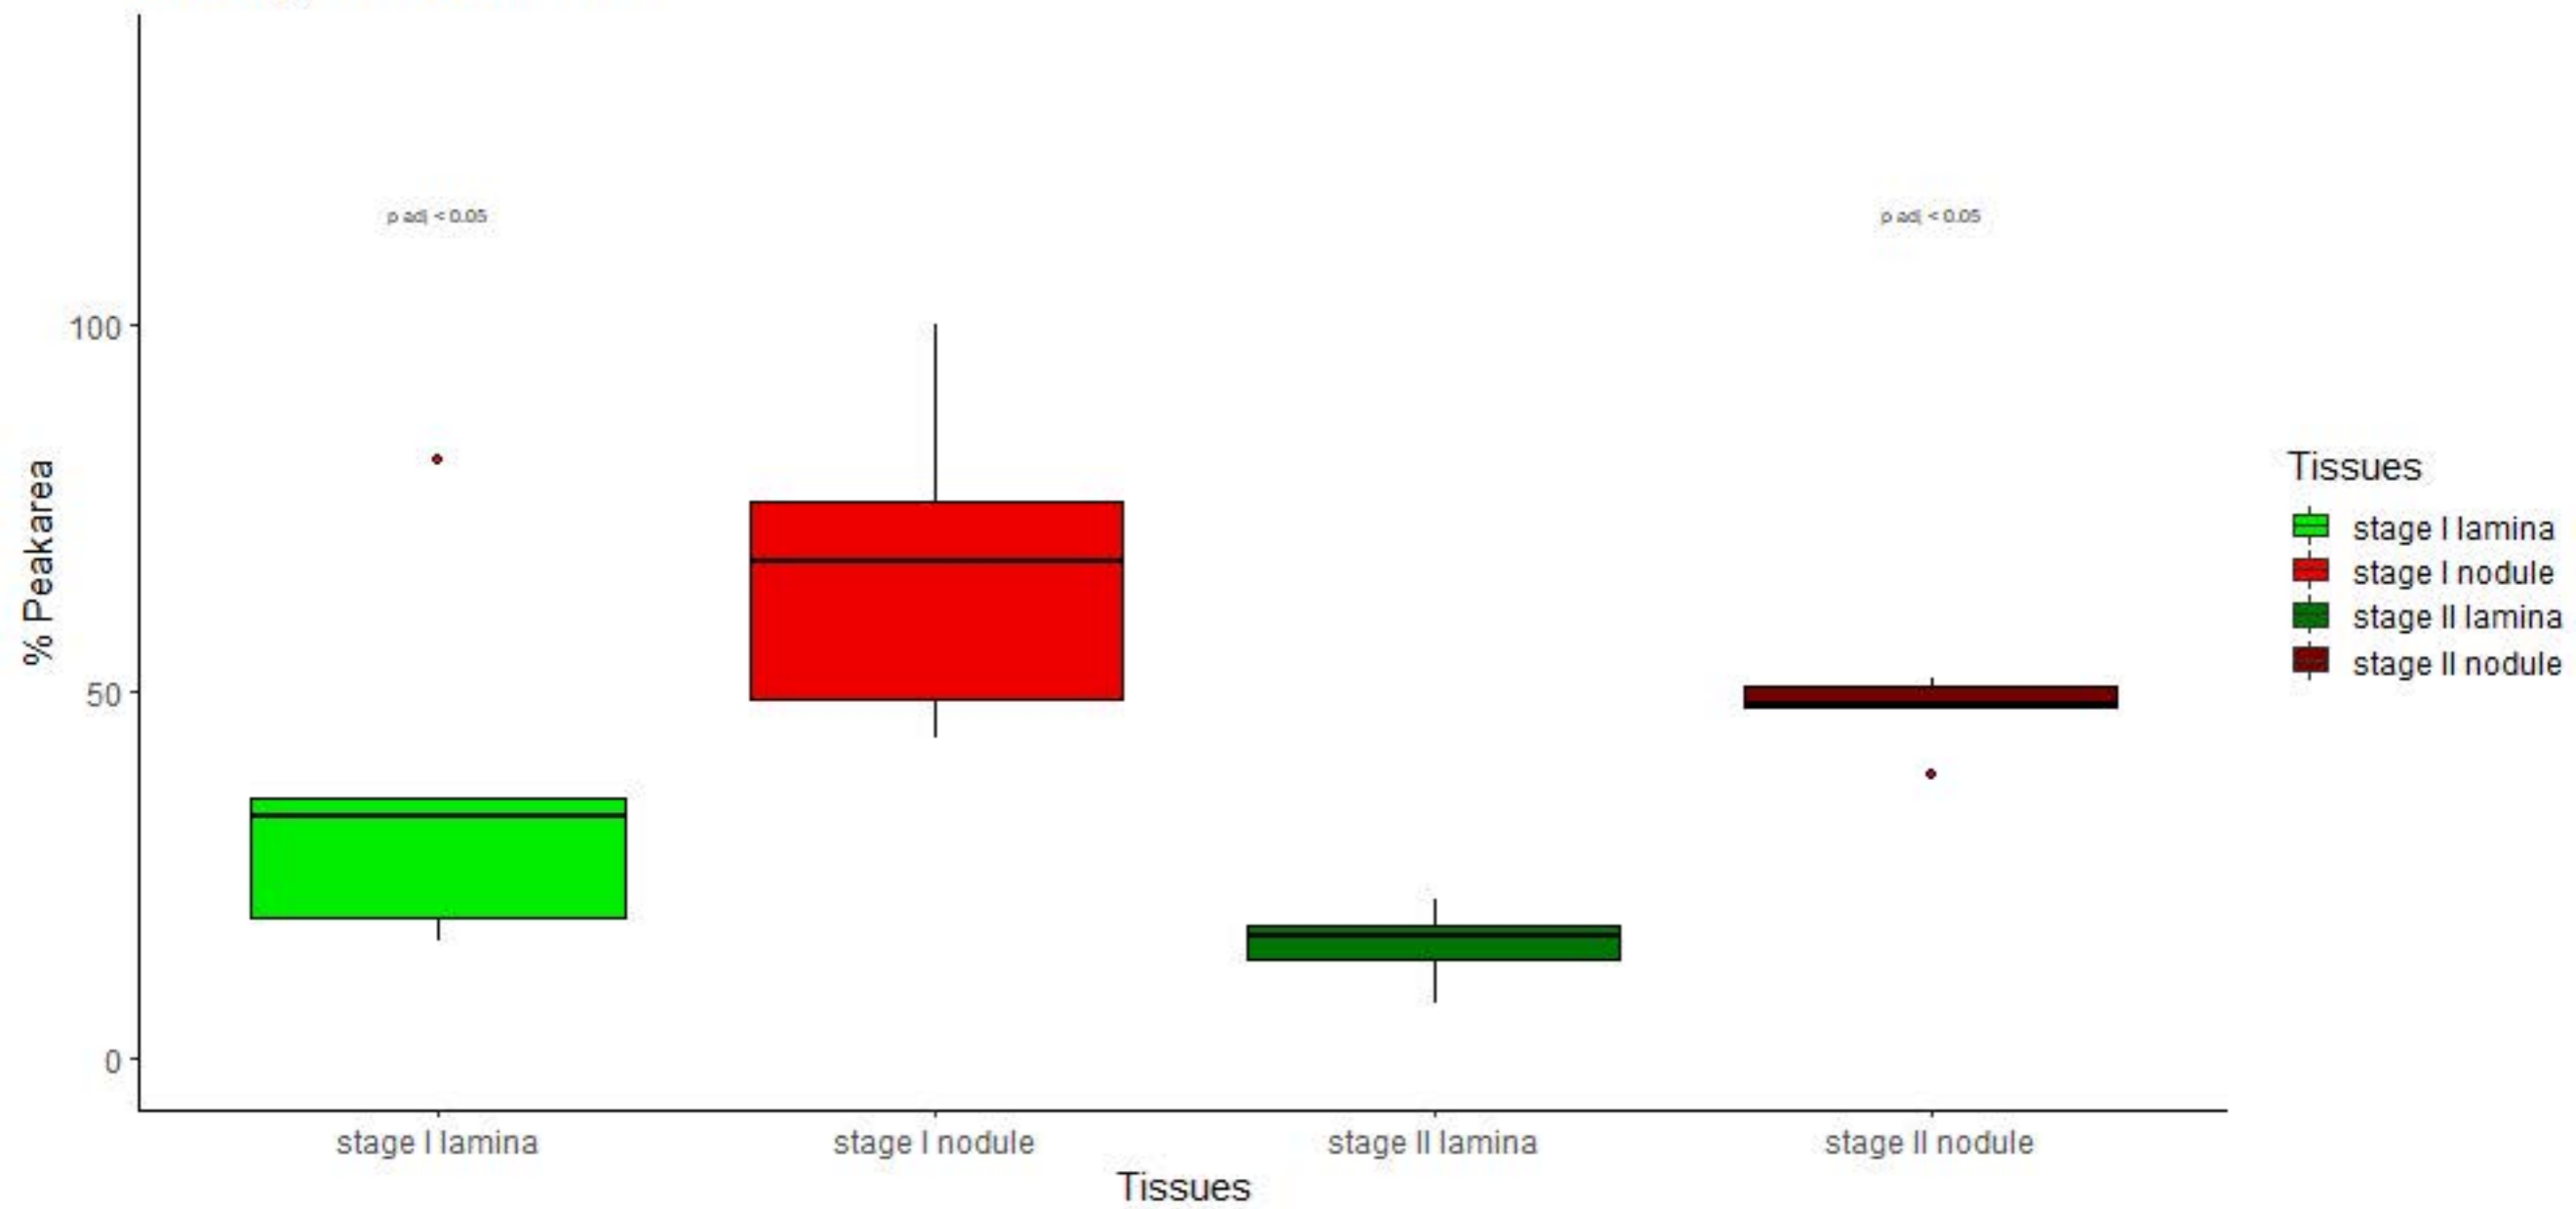

# NA Sugar acid 172

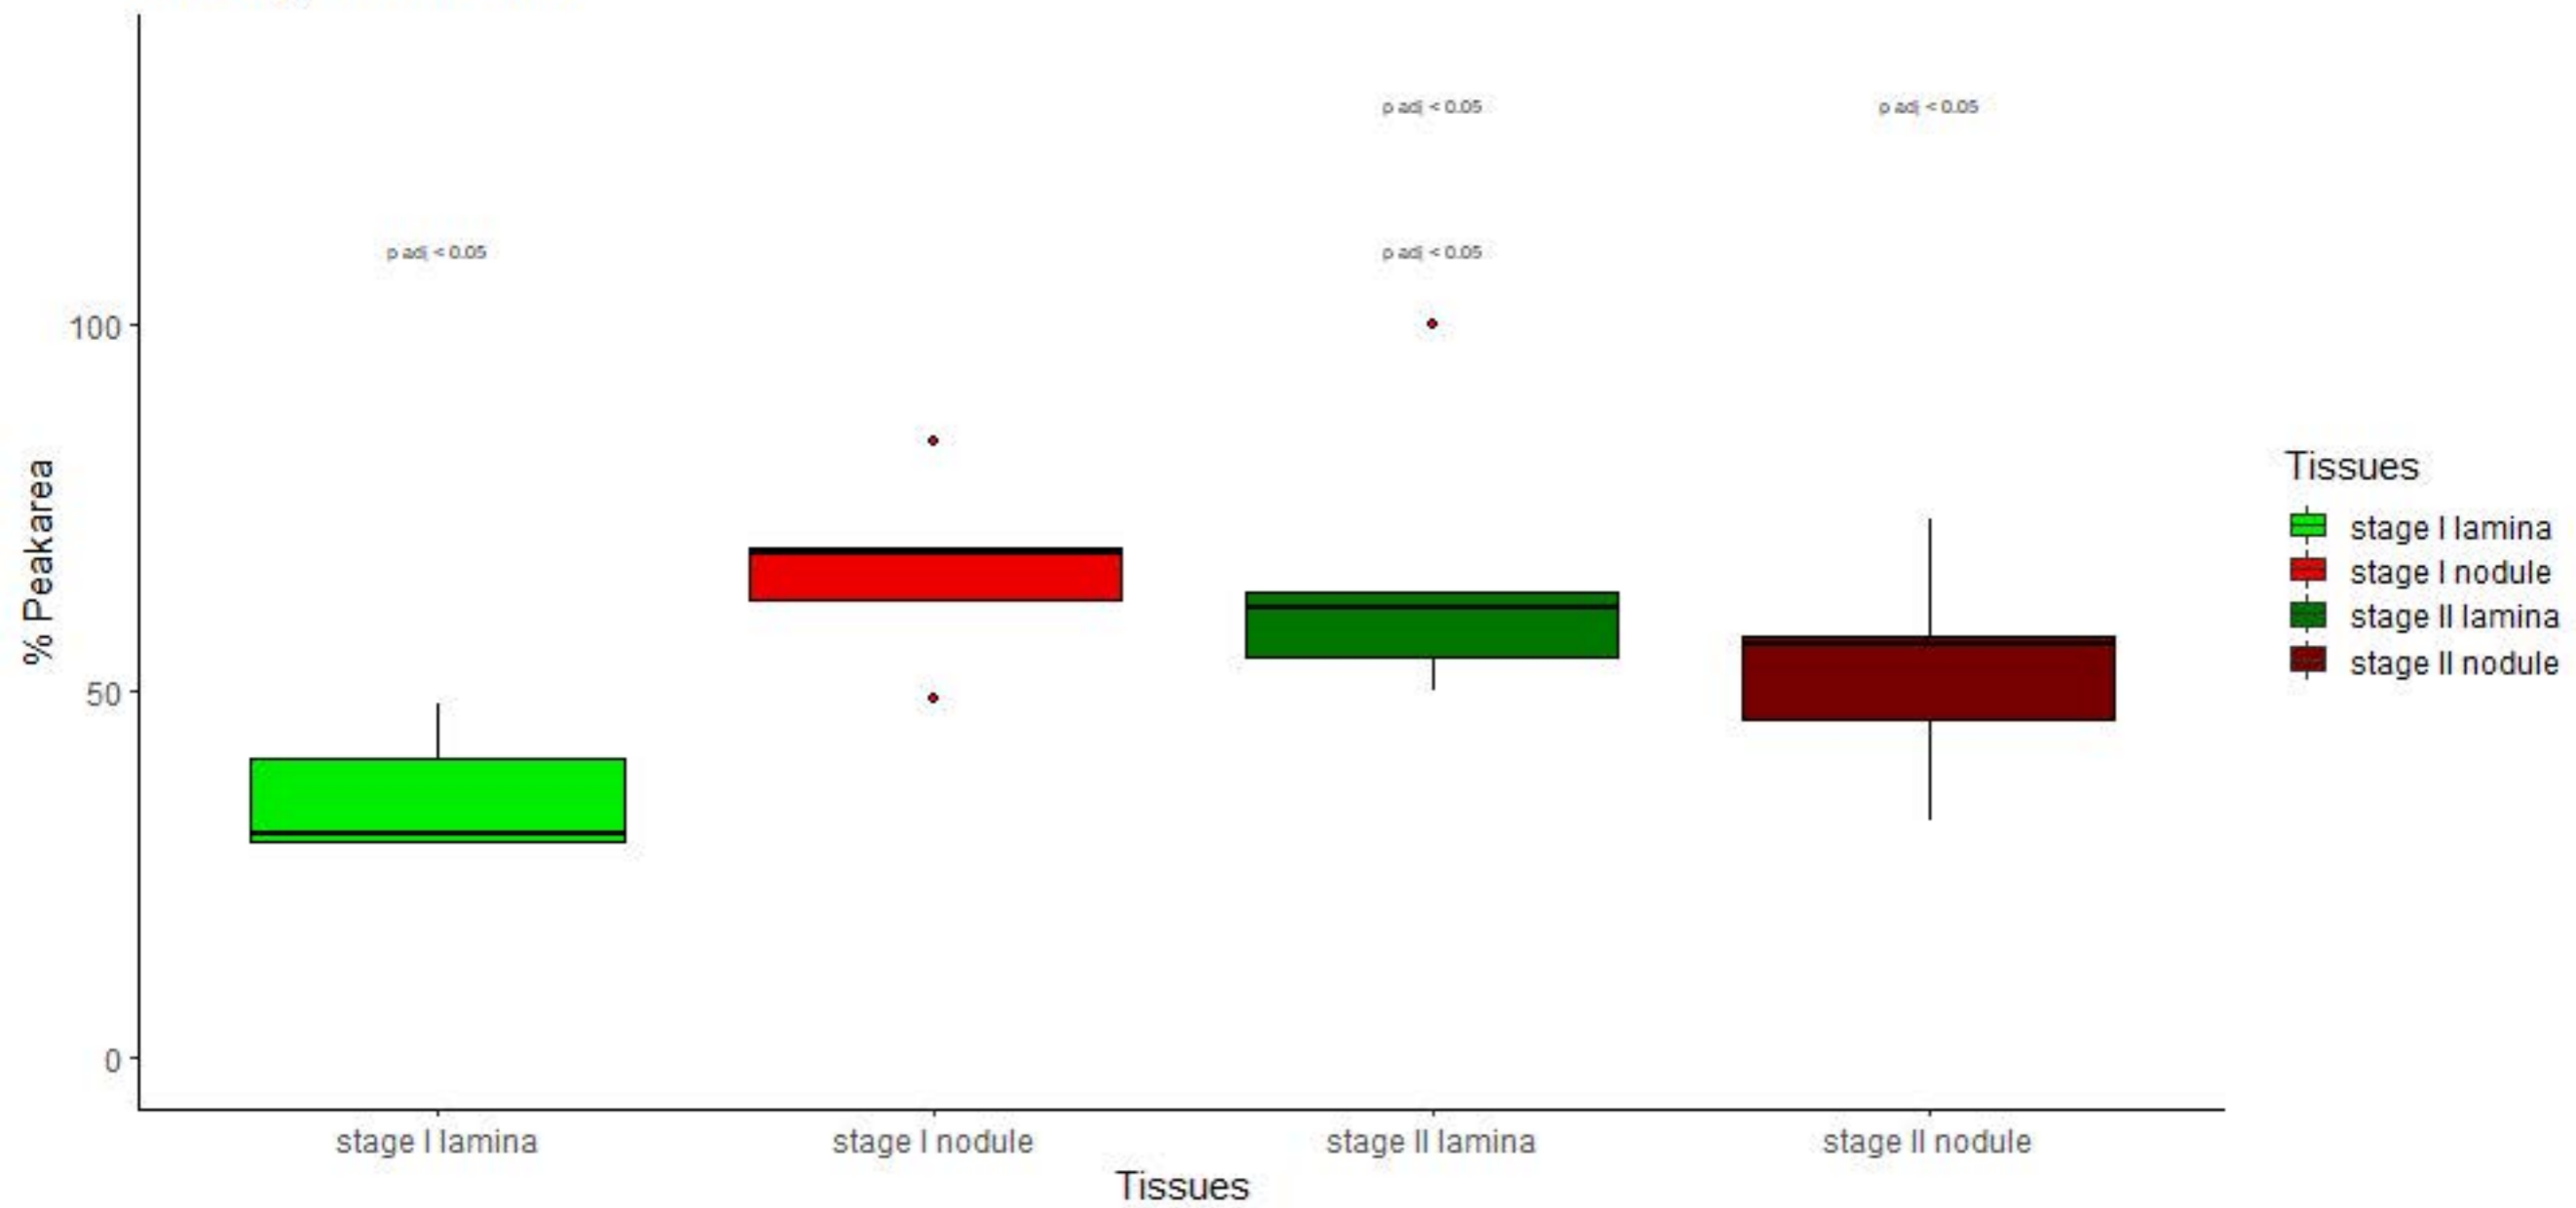

# NA Sugar acid 173

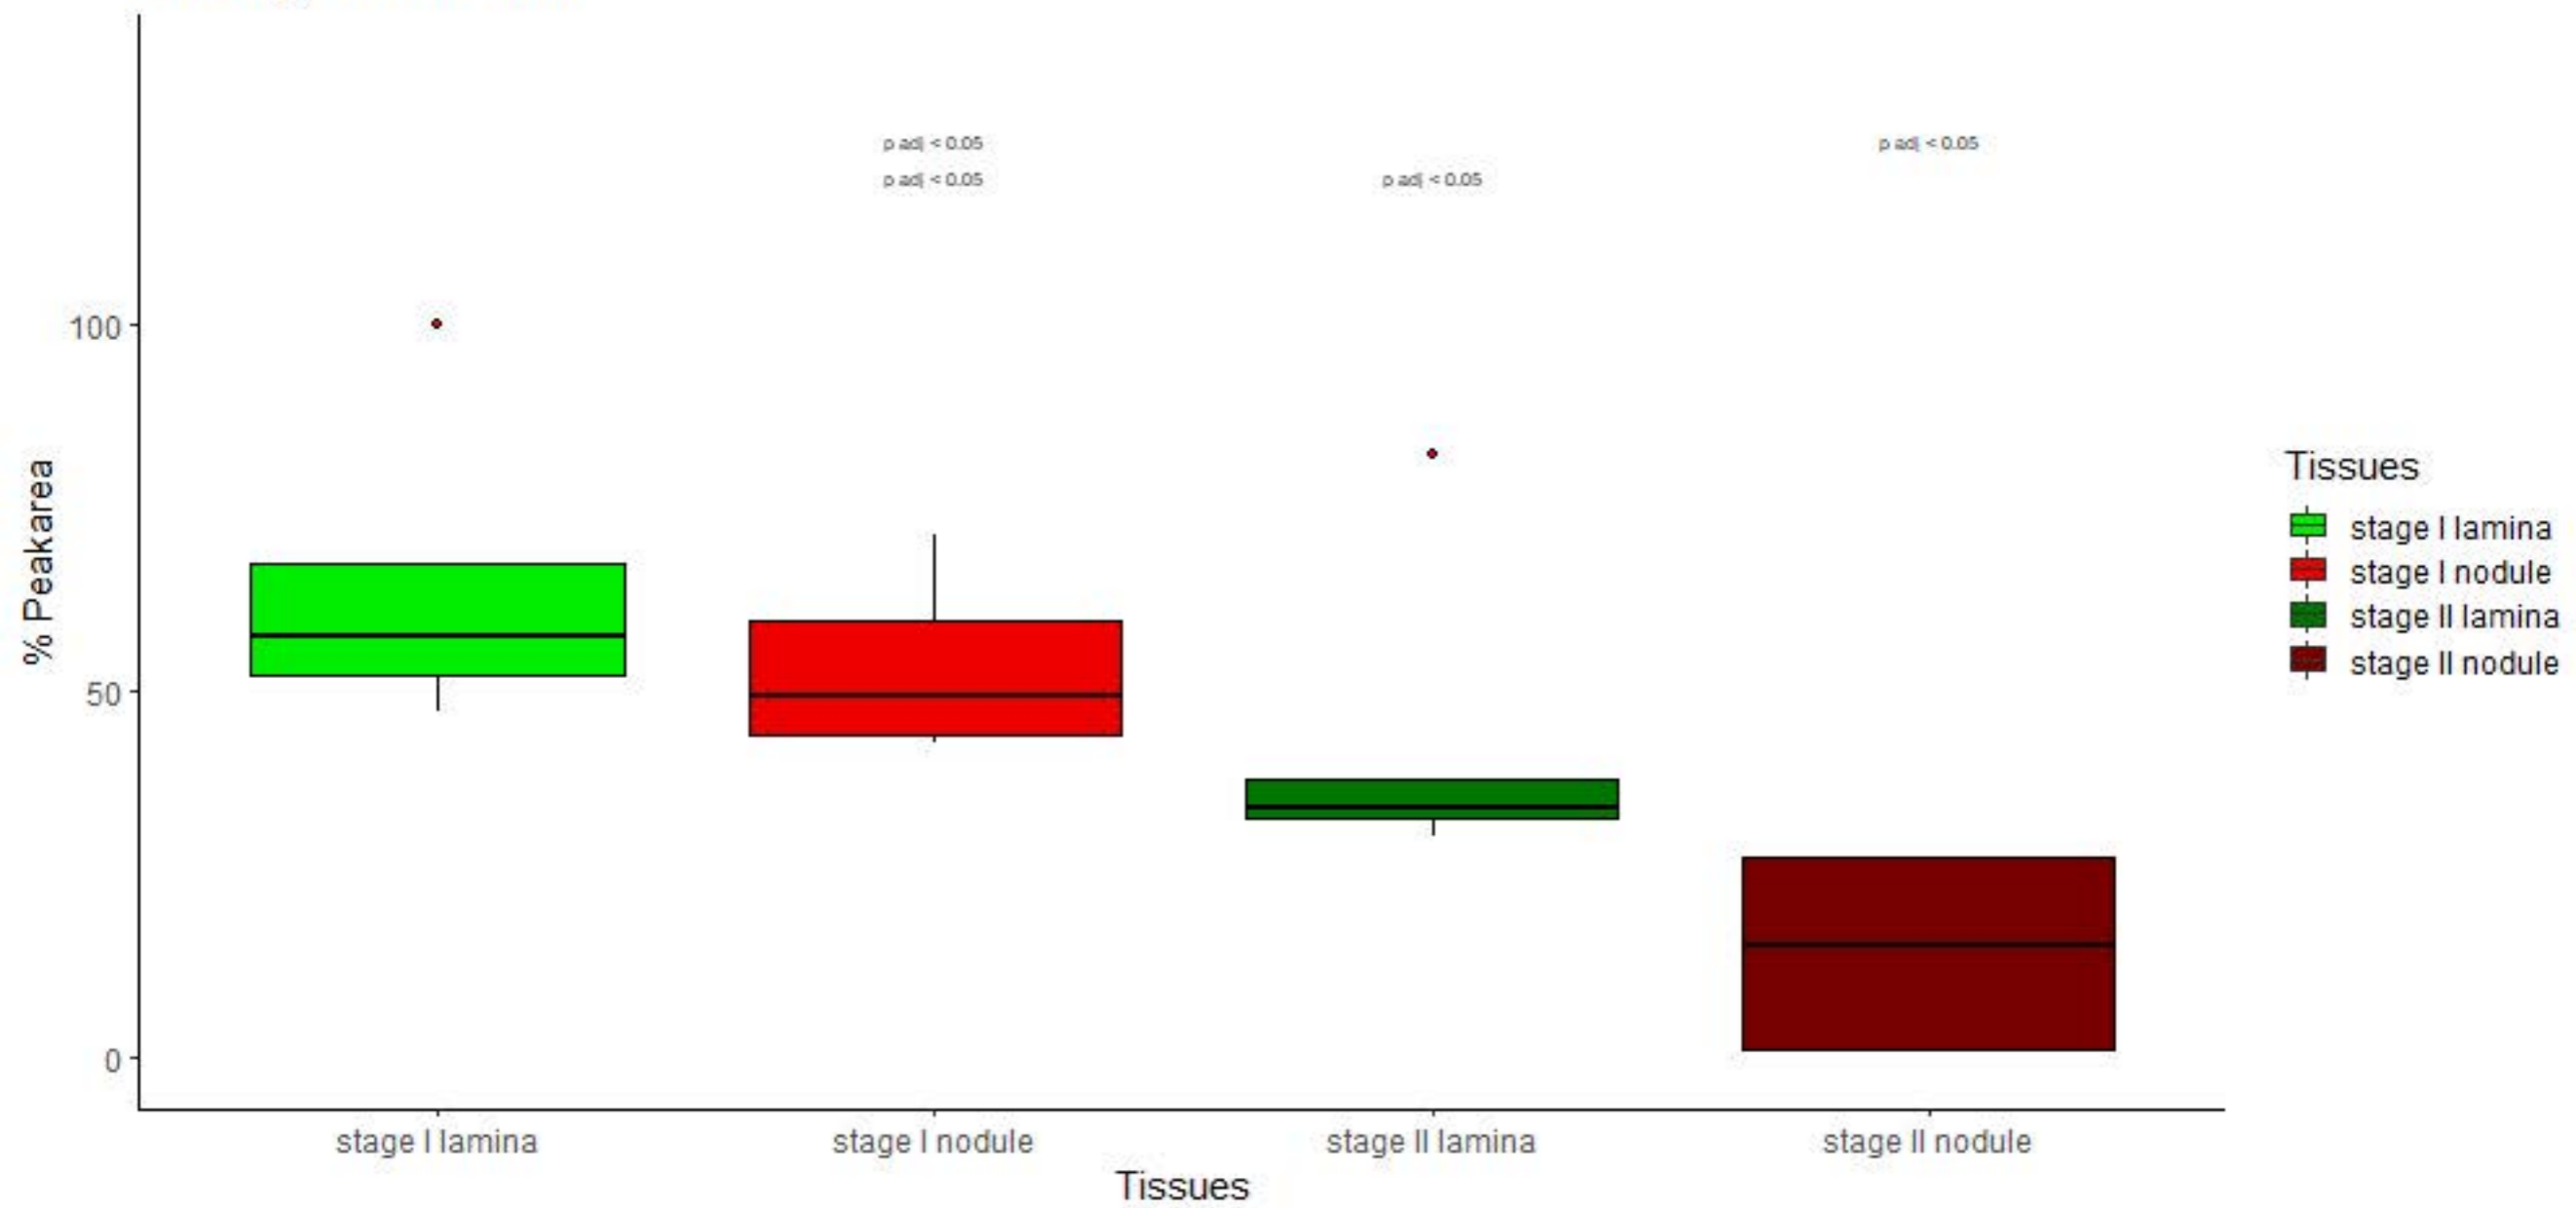

# NA Ascorbic acid like 134

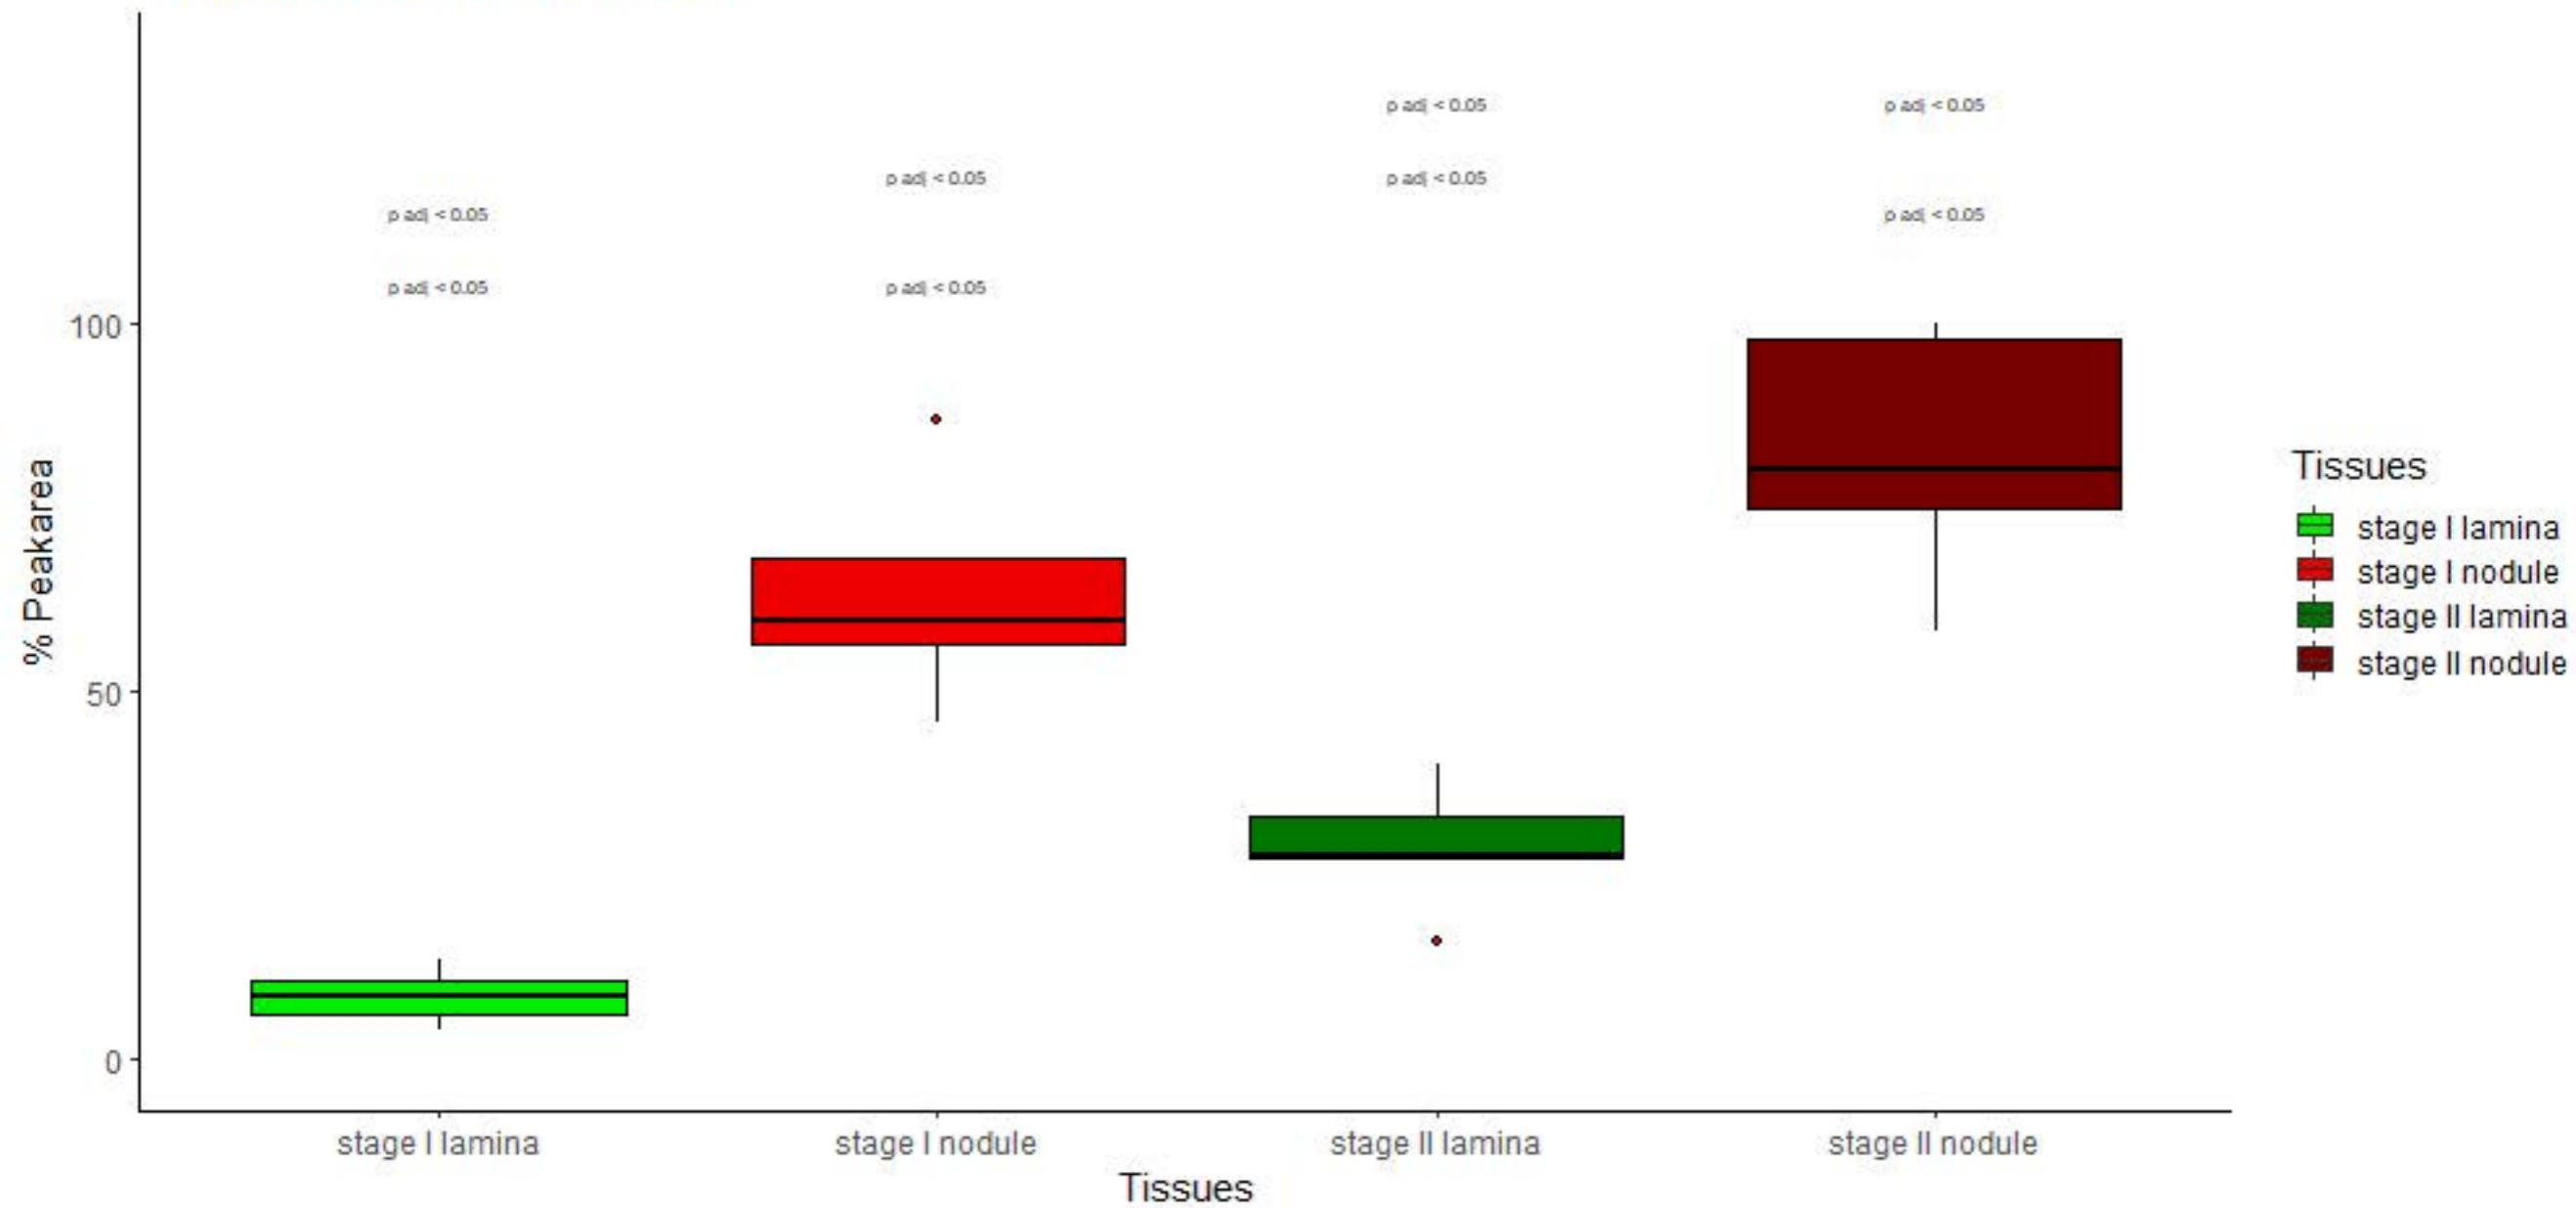

NA 105

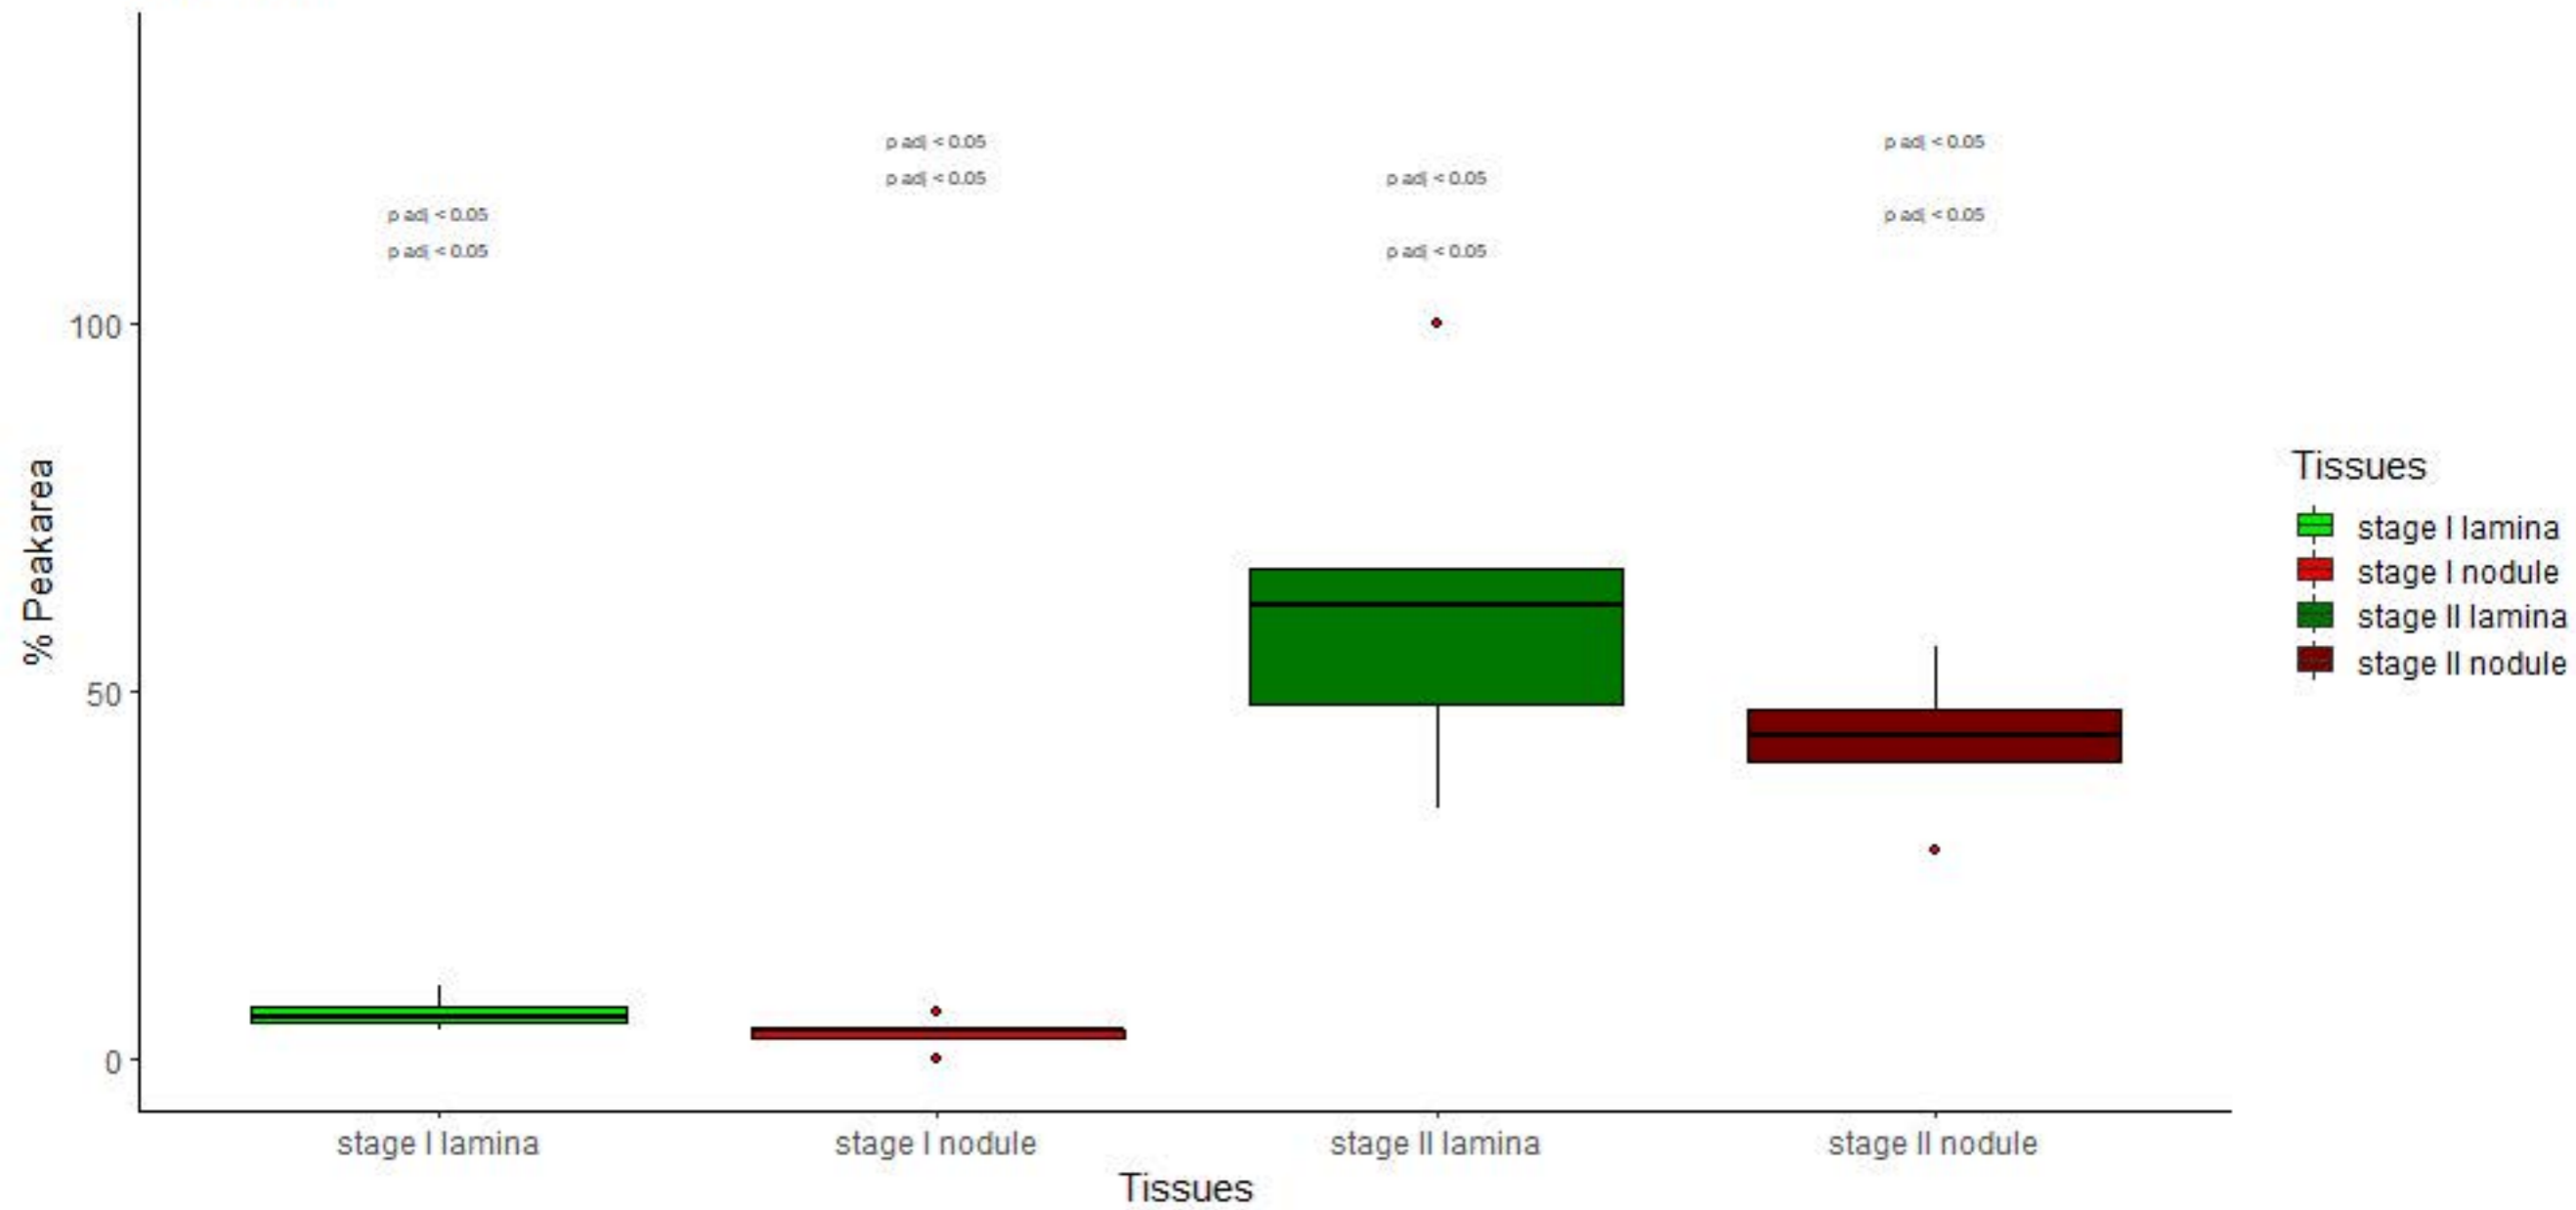

NA 116

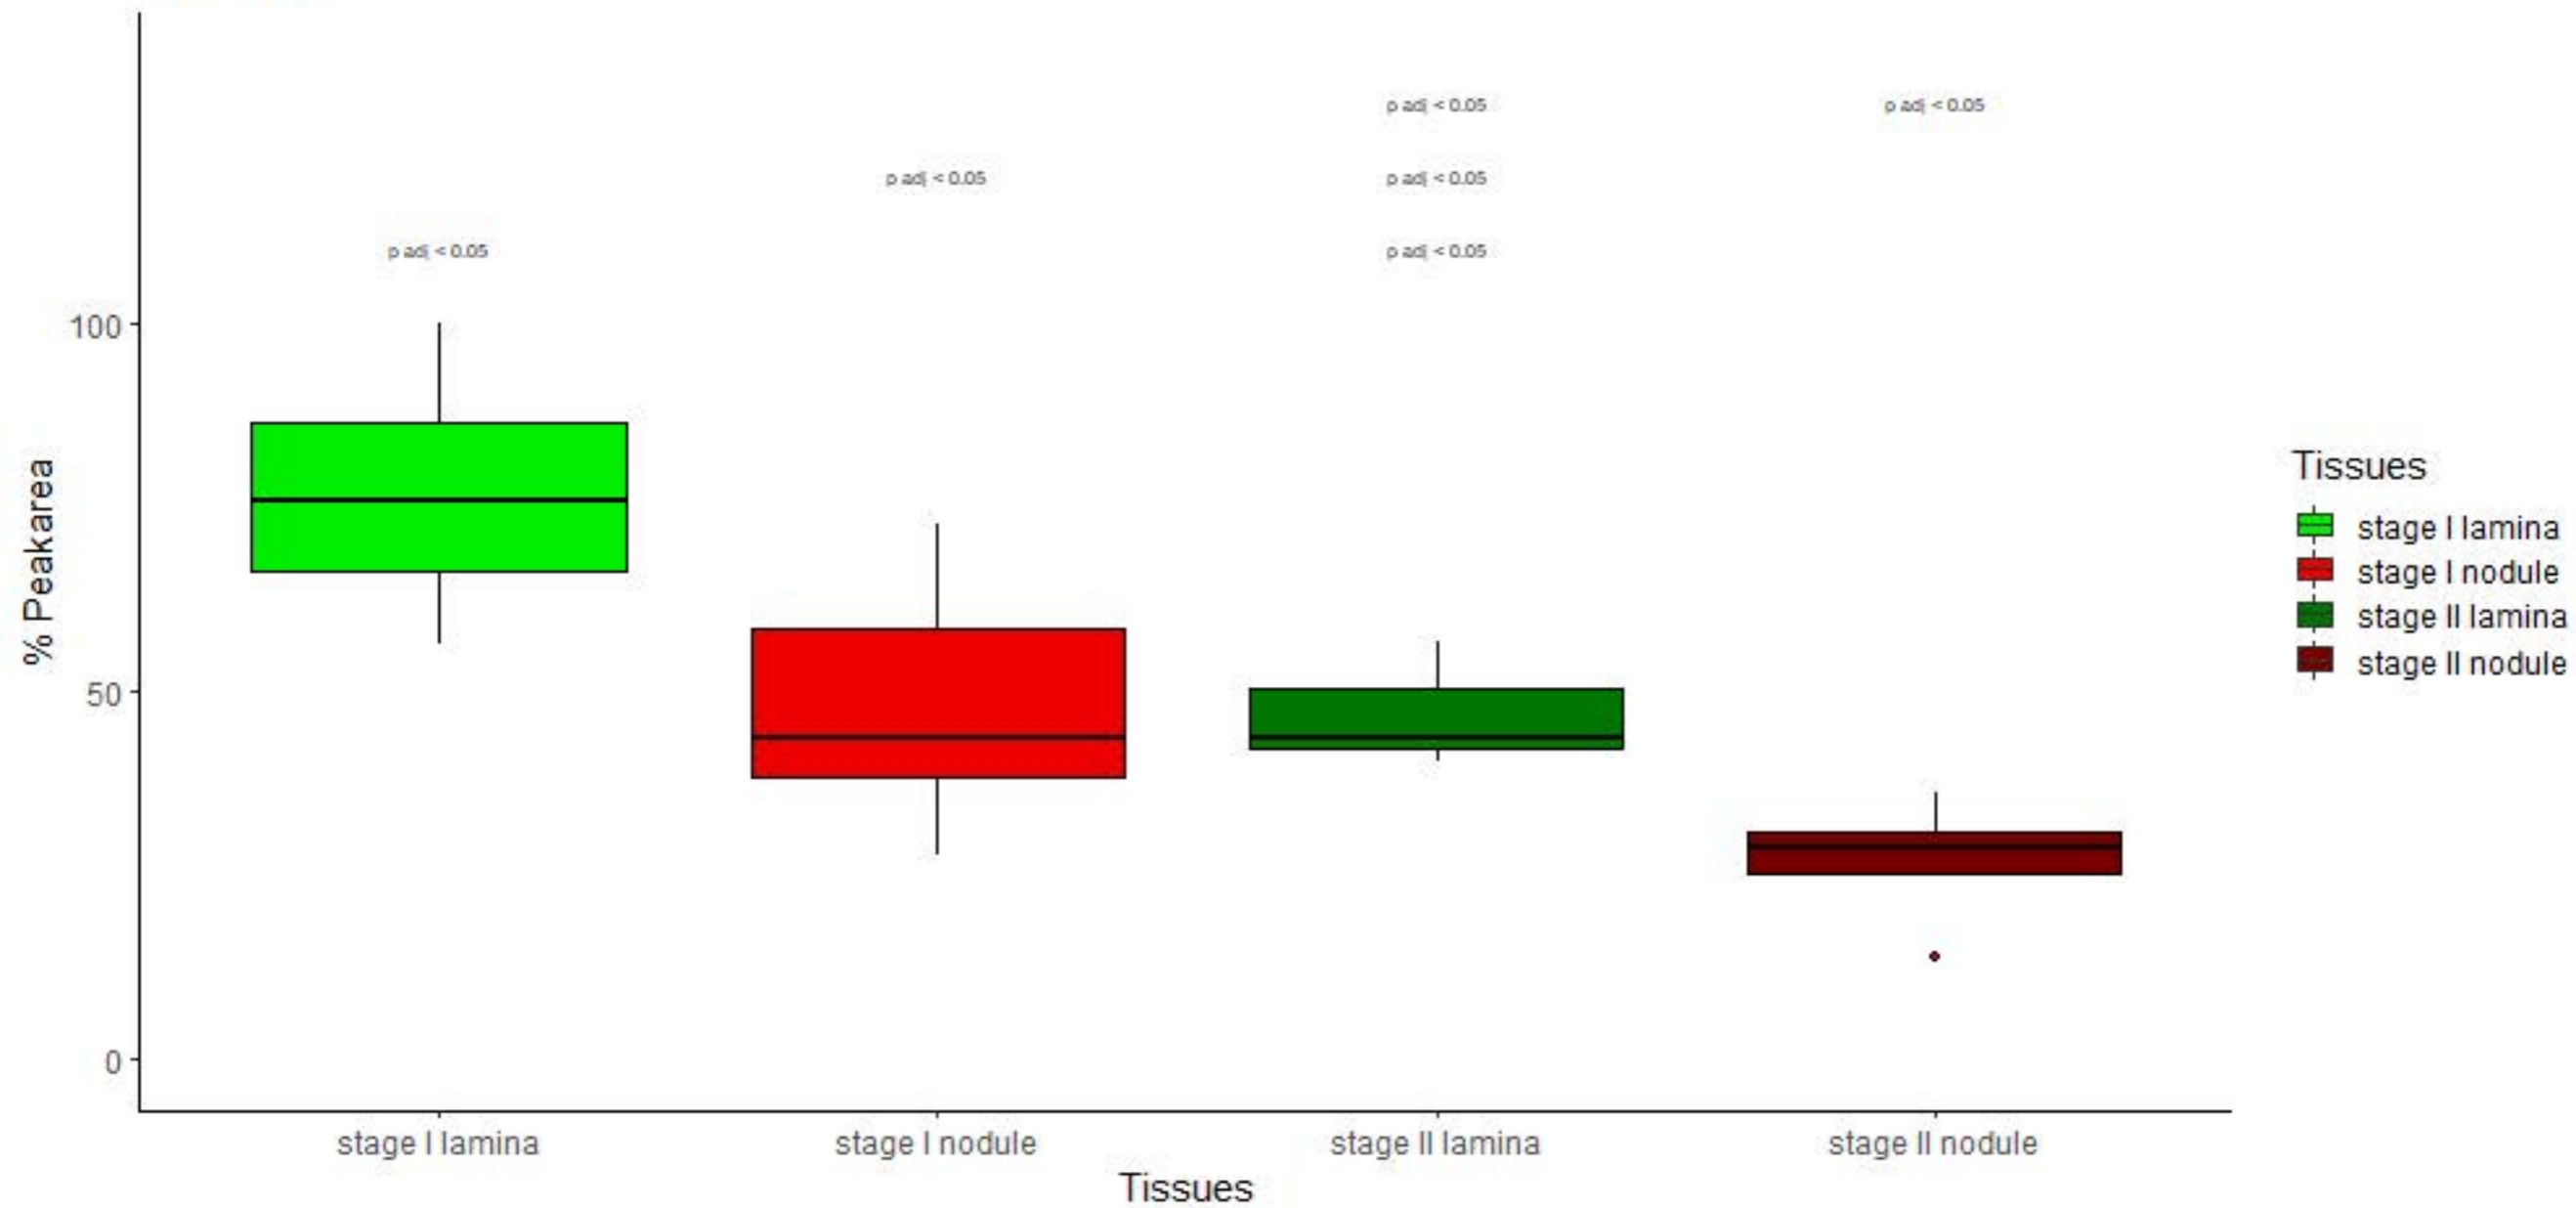

NA 149

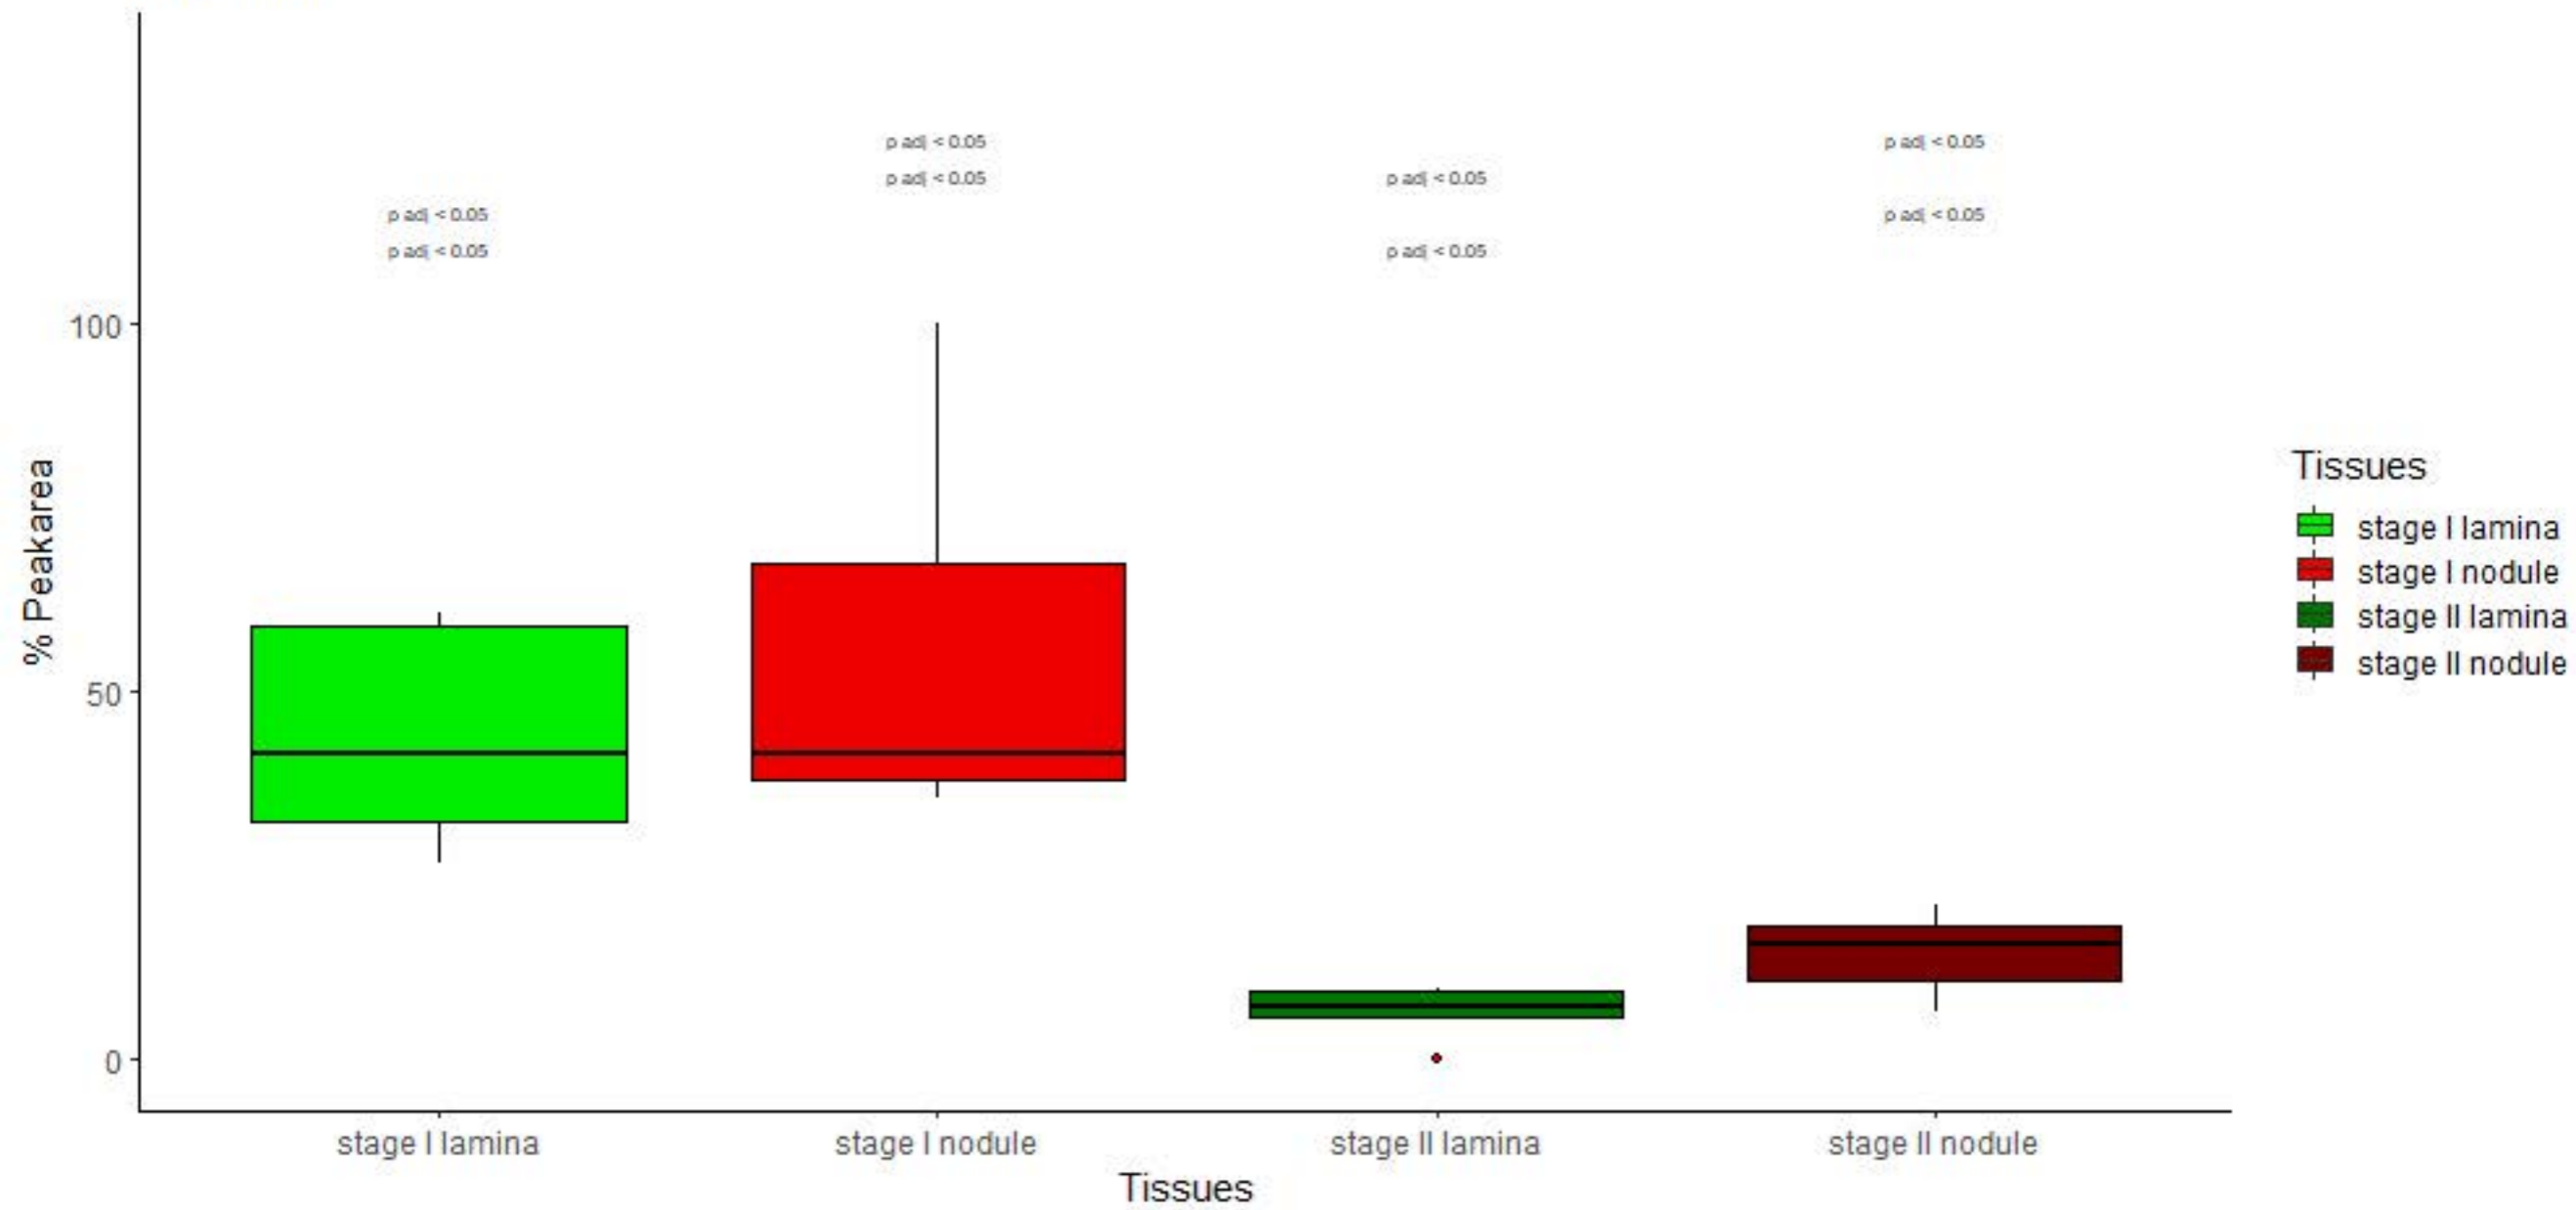



NA 154

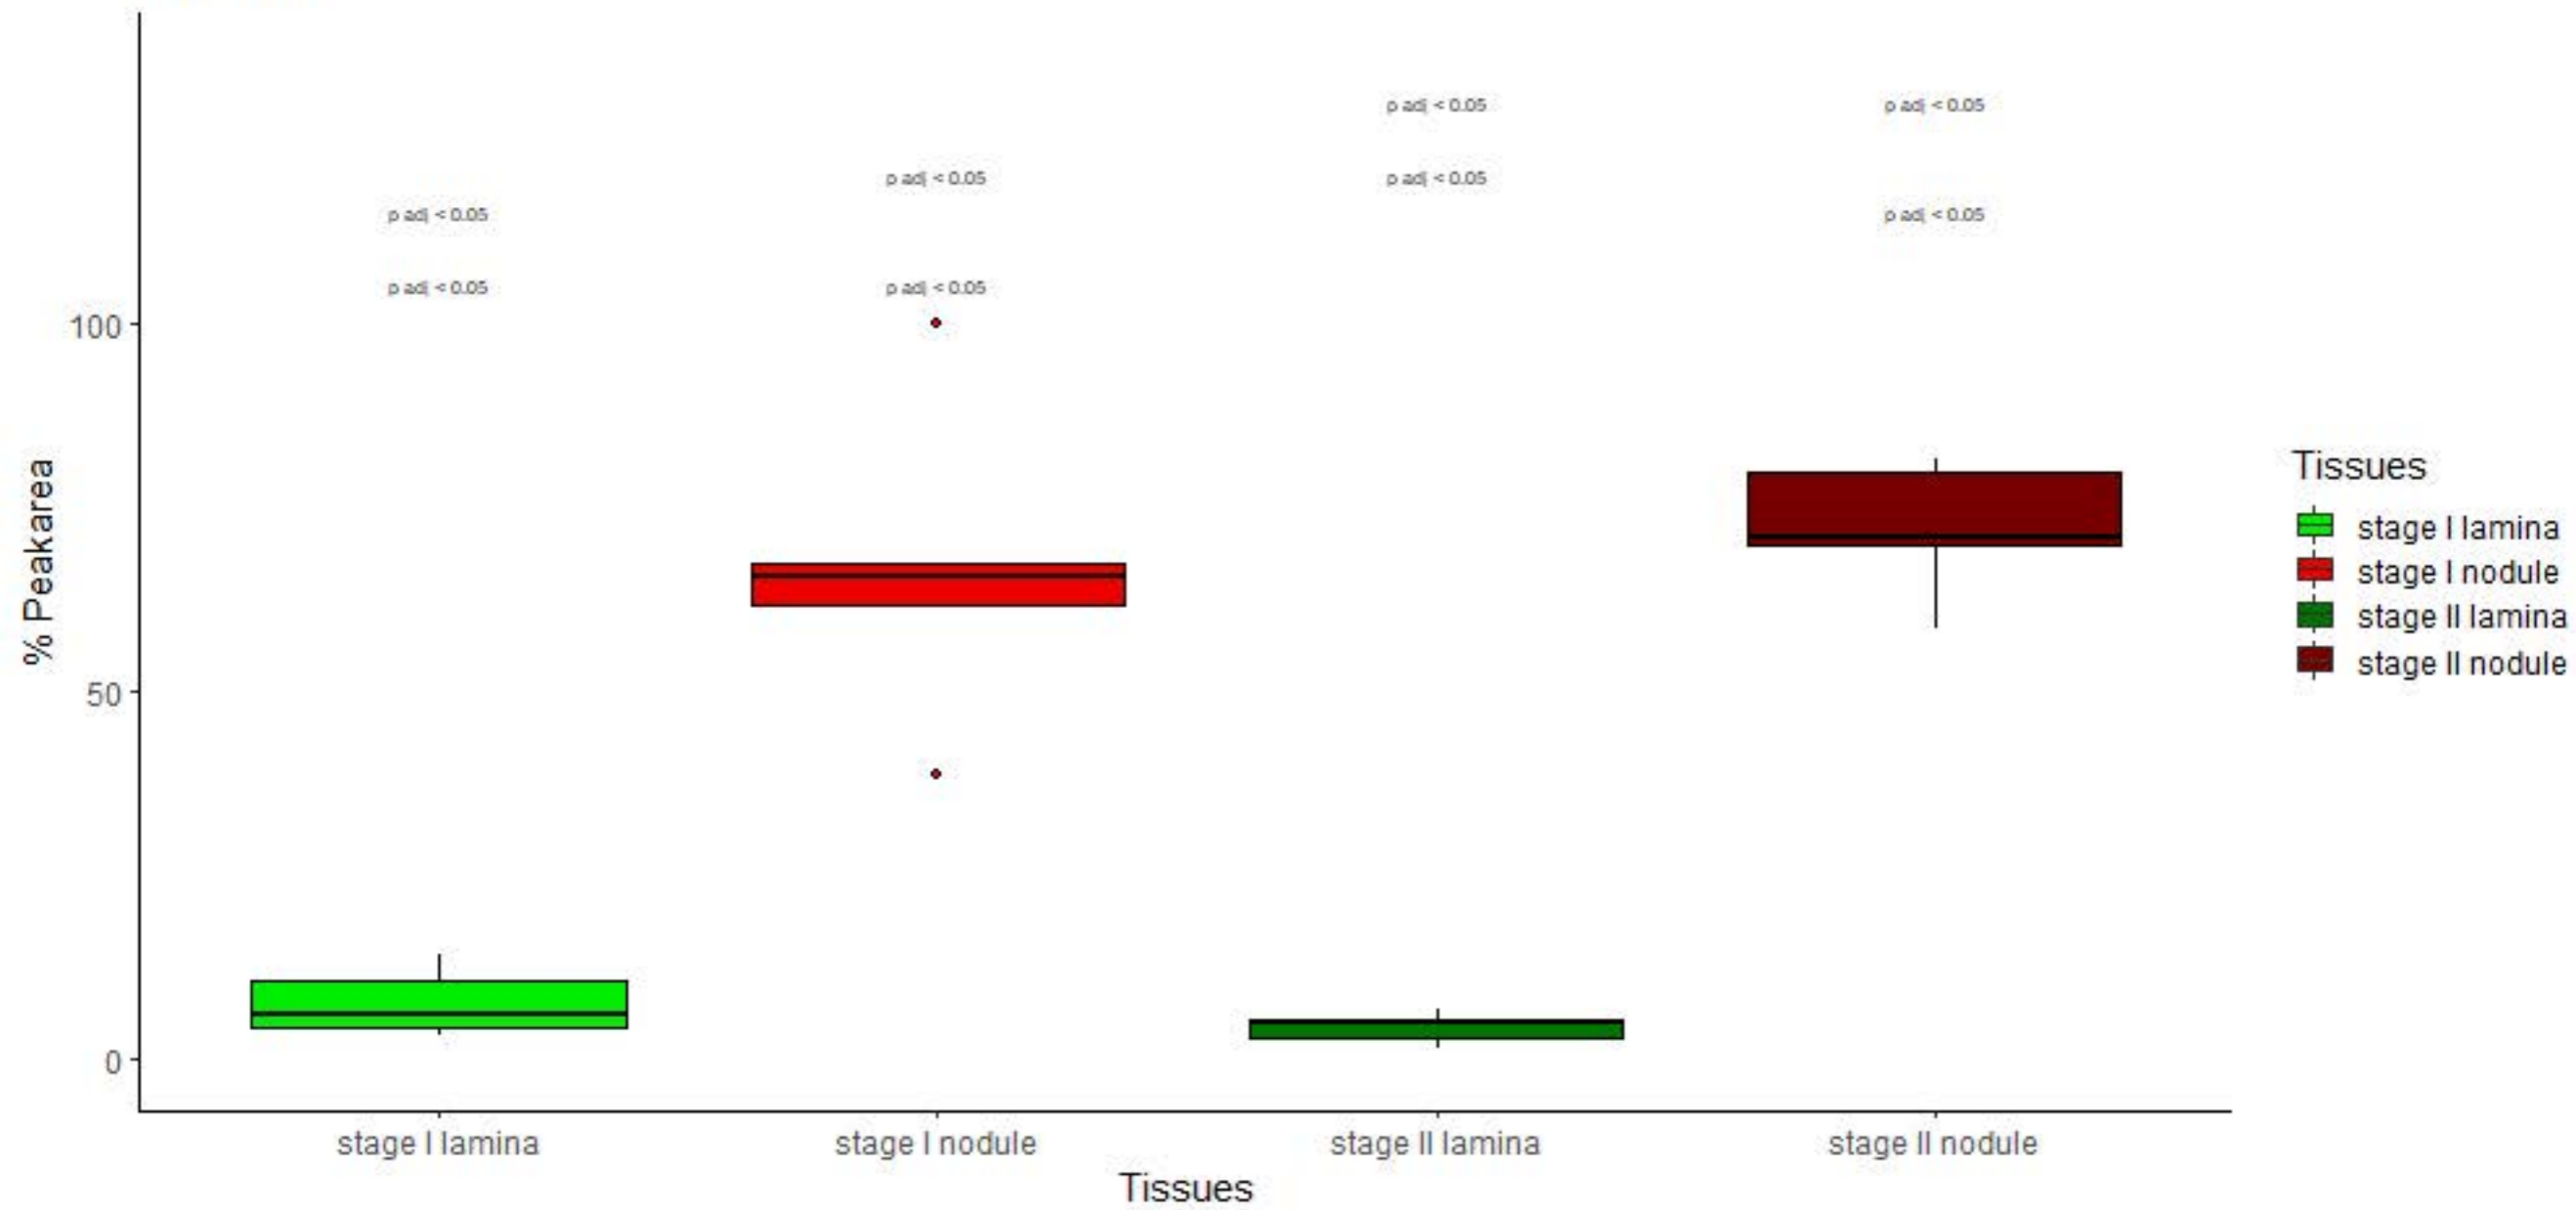

NA 156

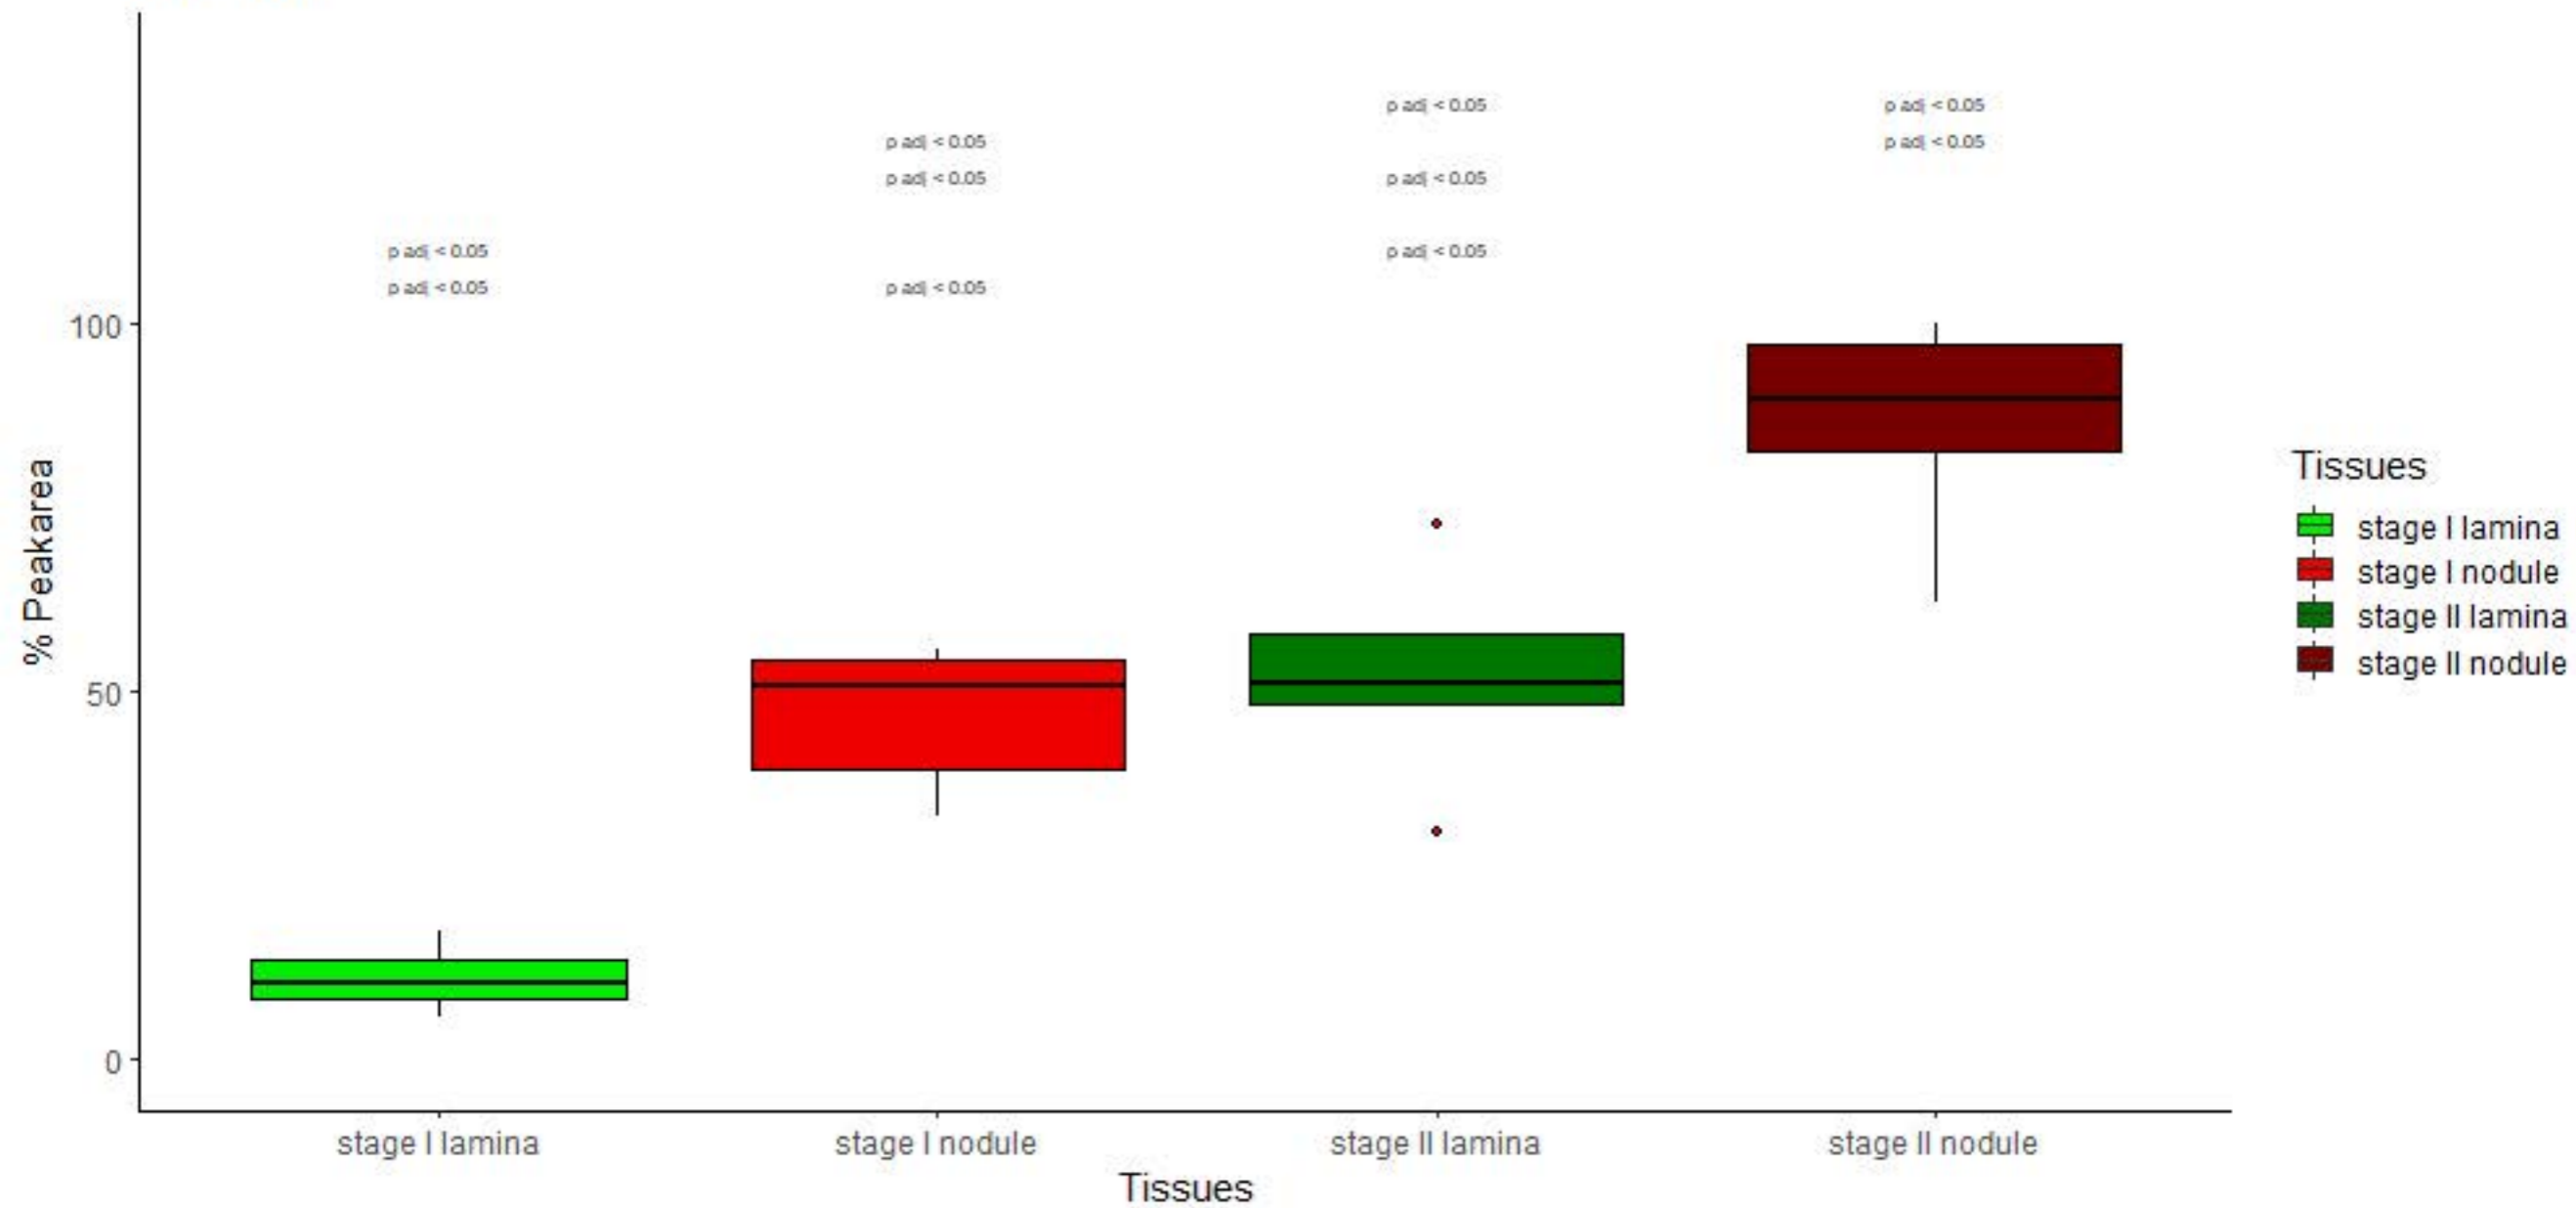

NA 165

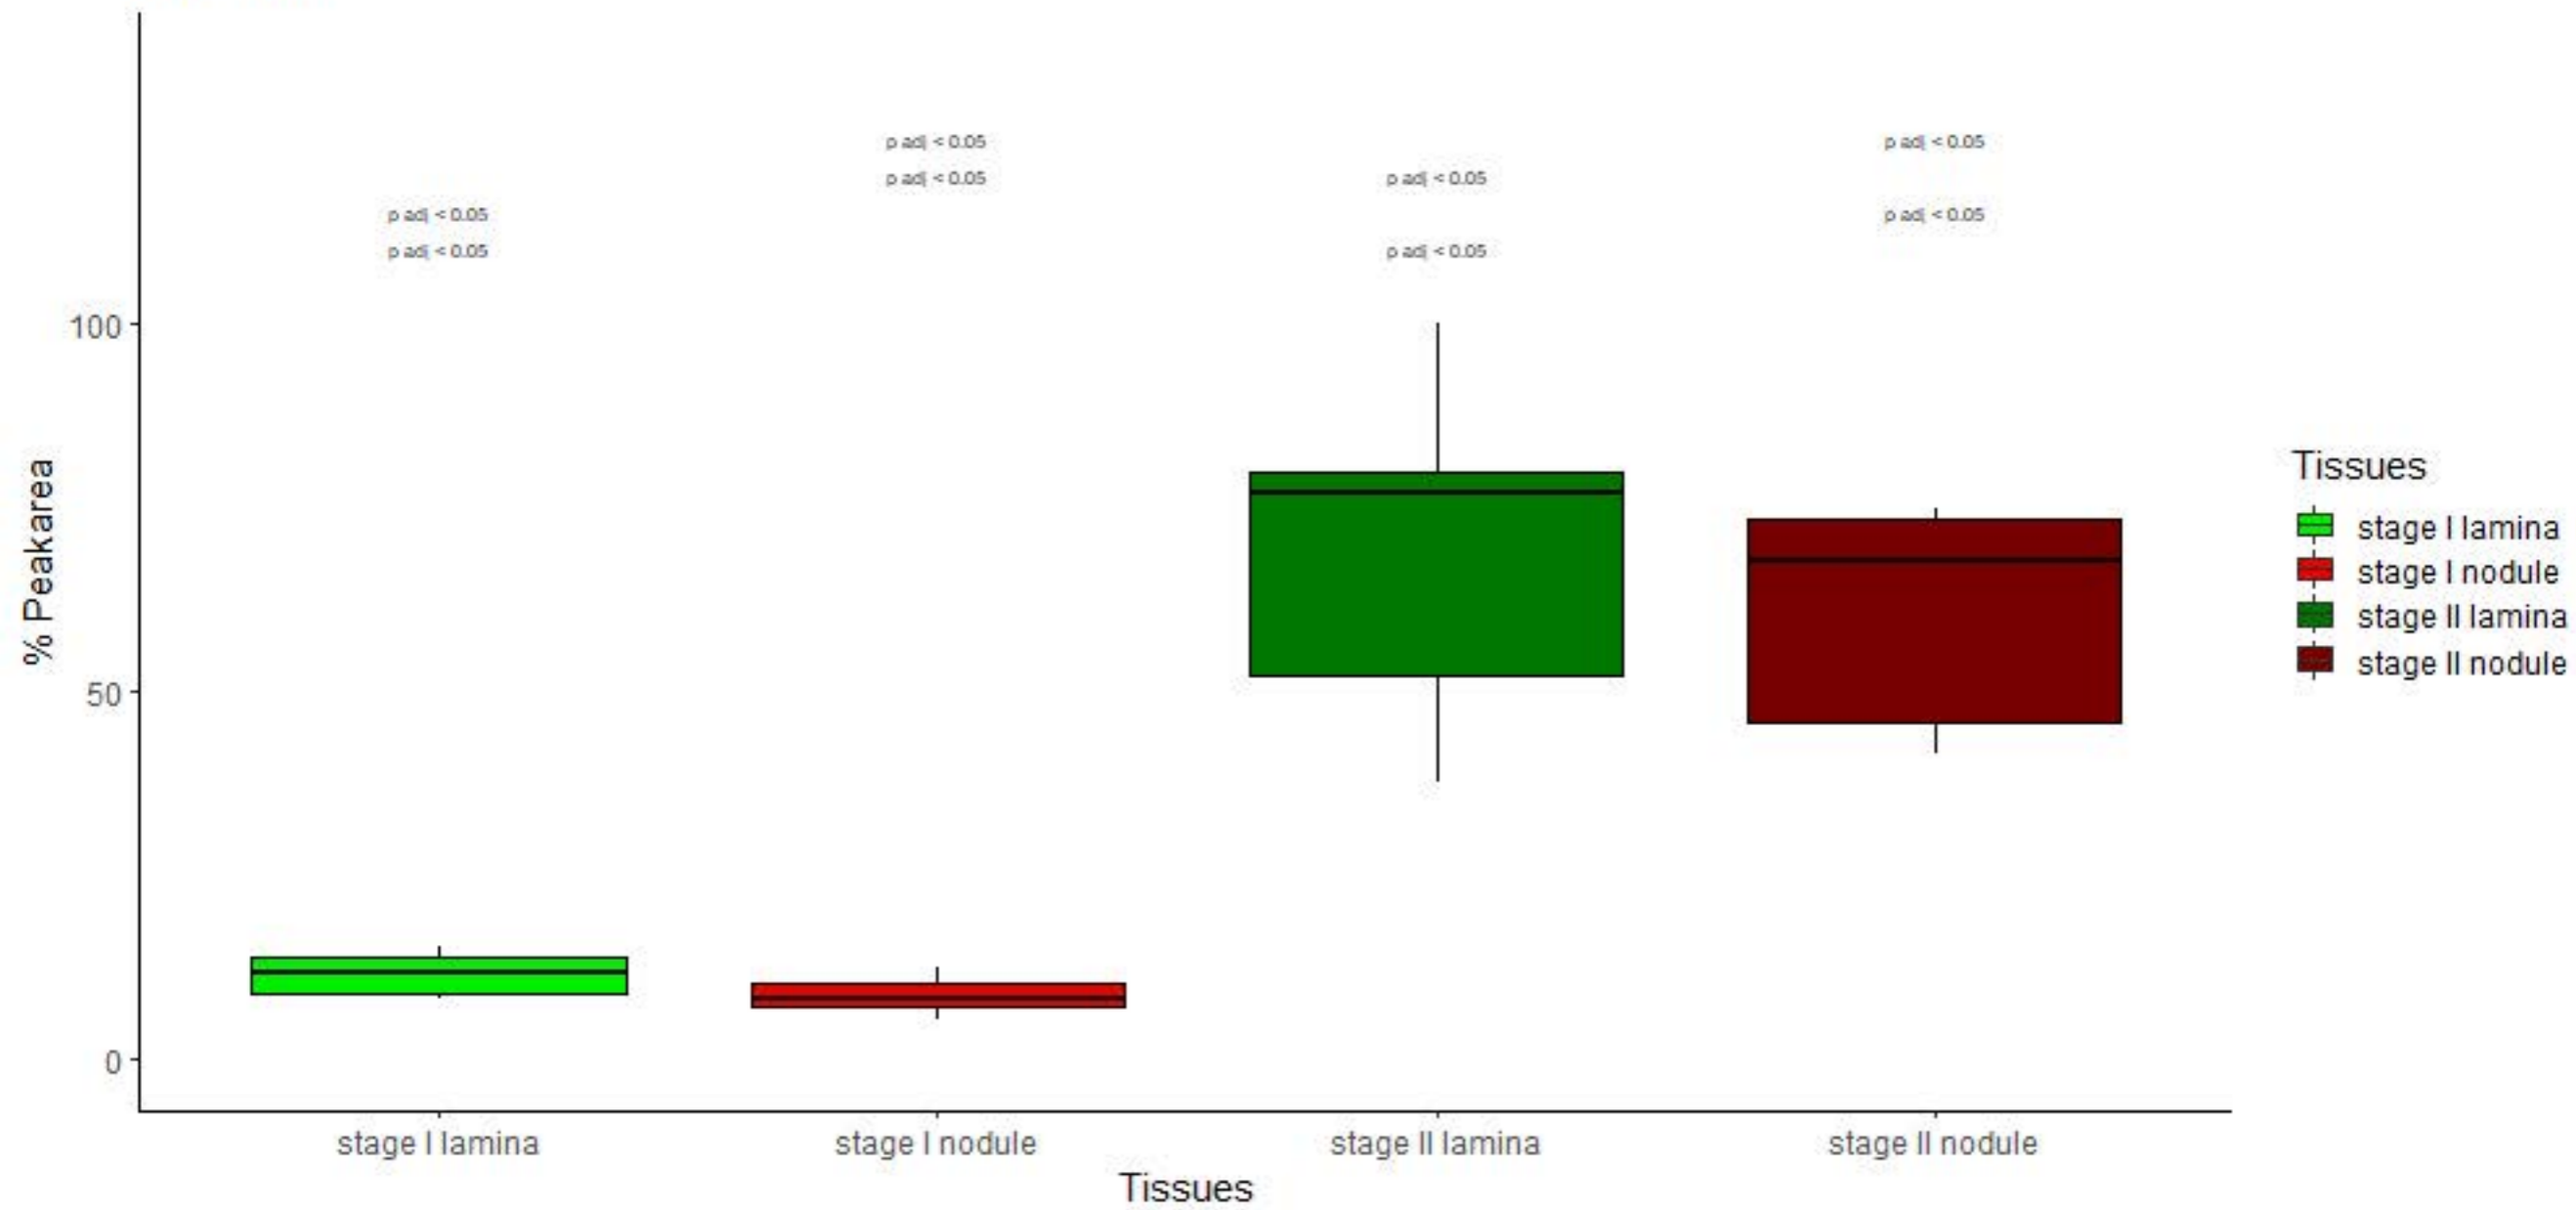

NA 169

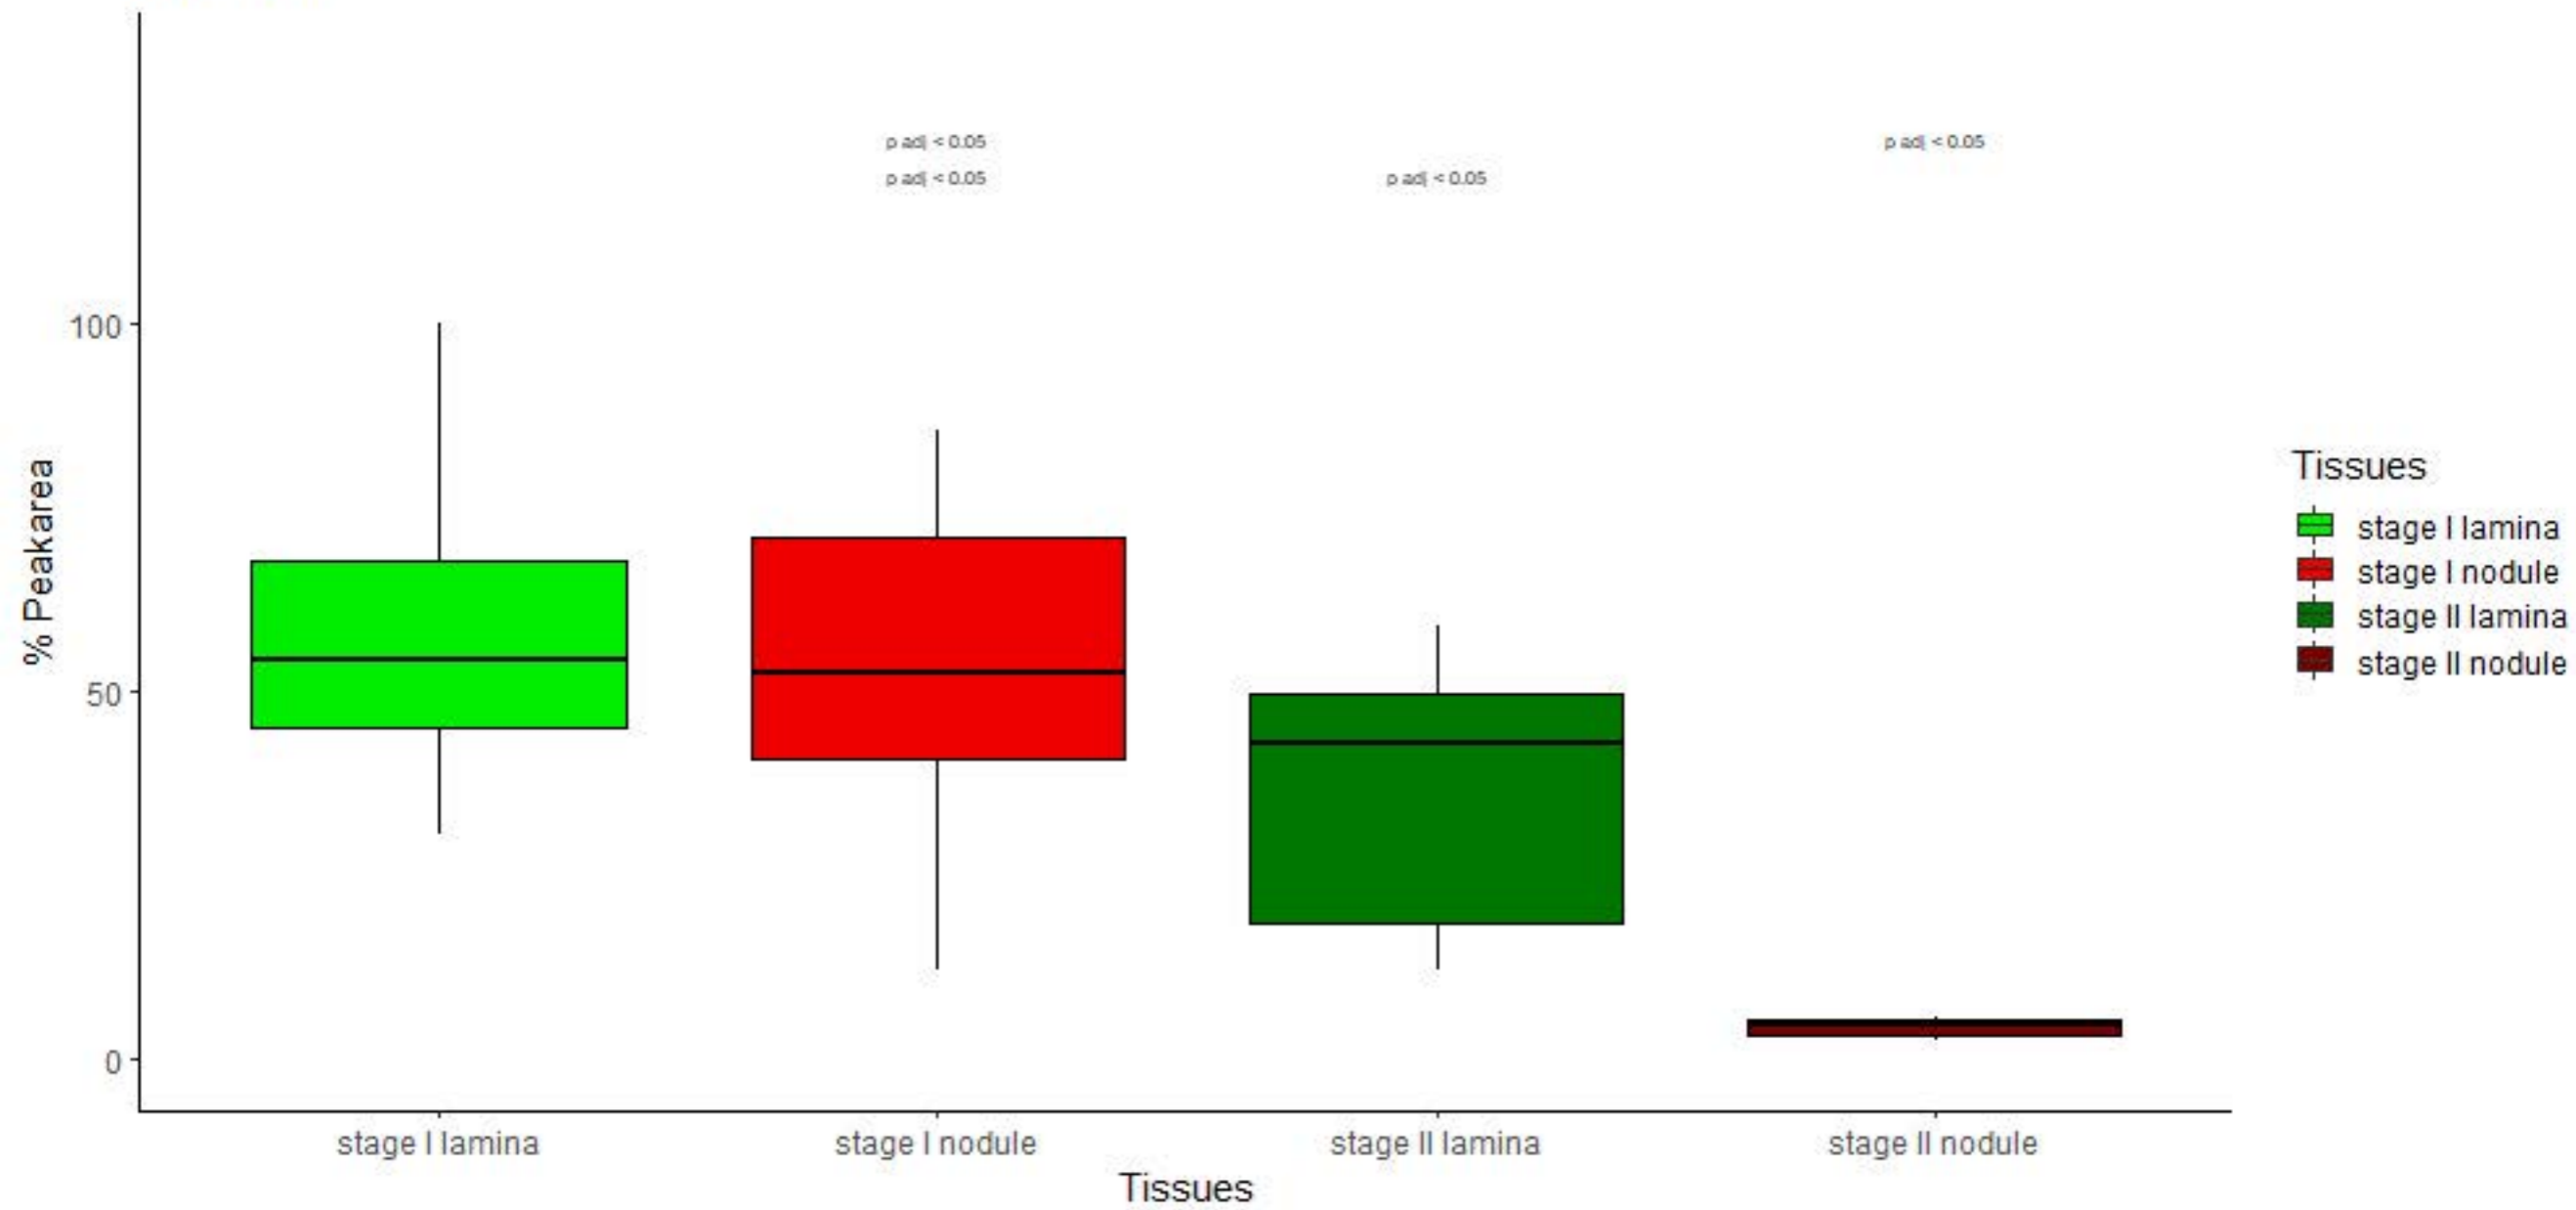

NA 176

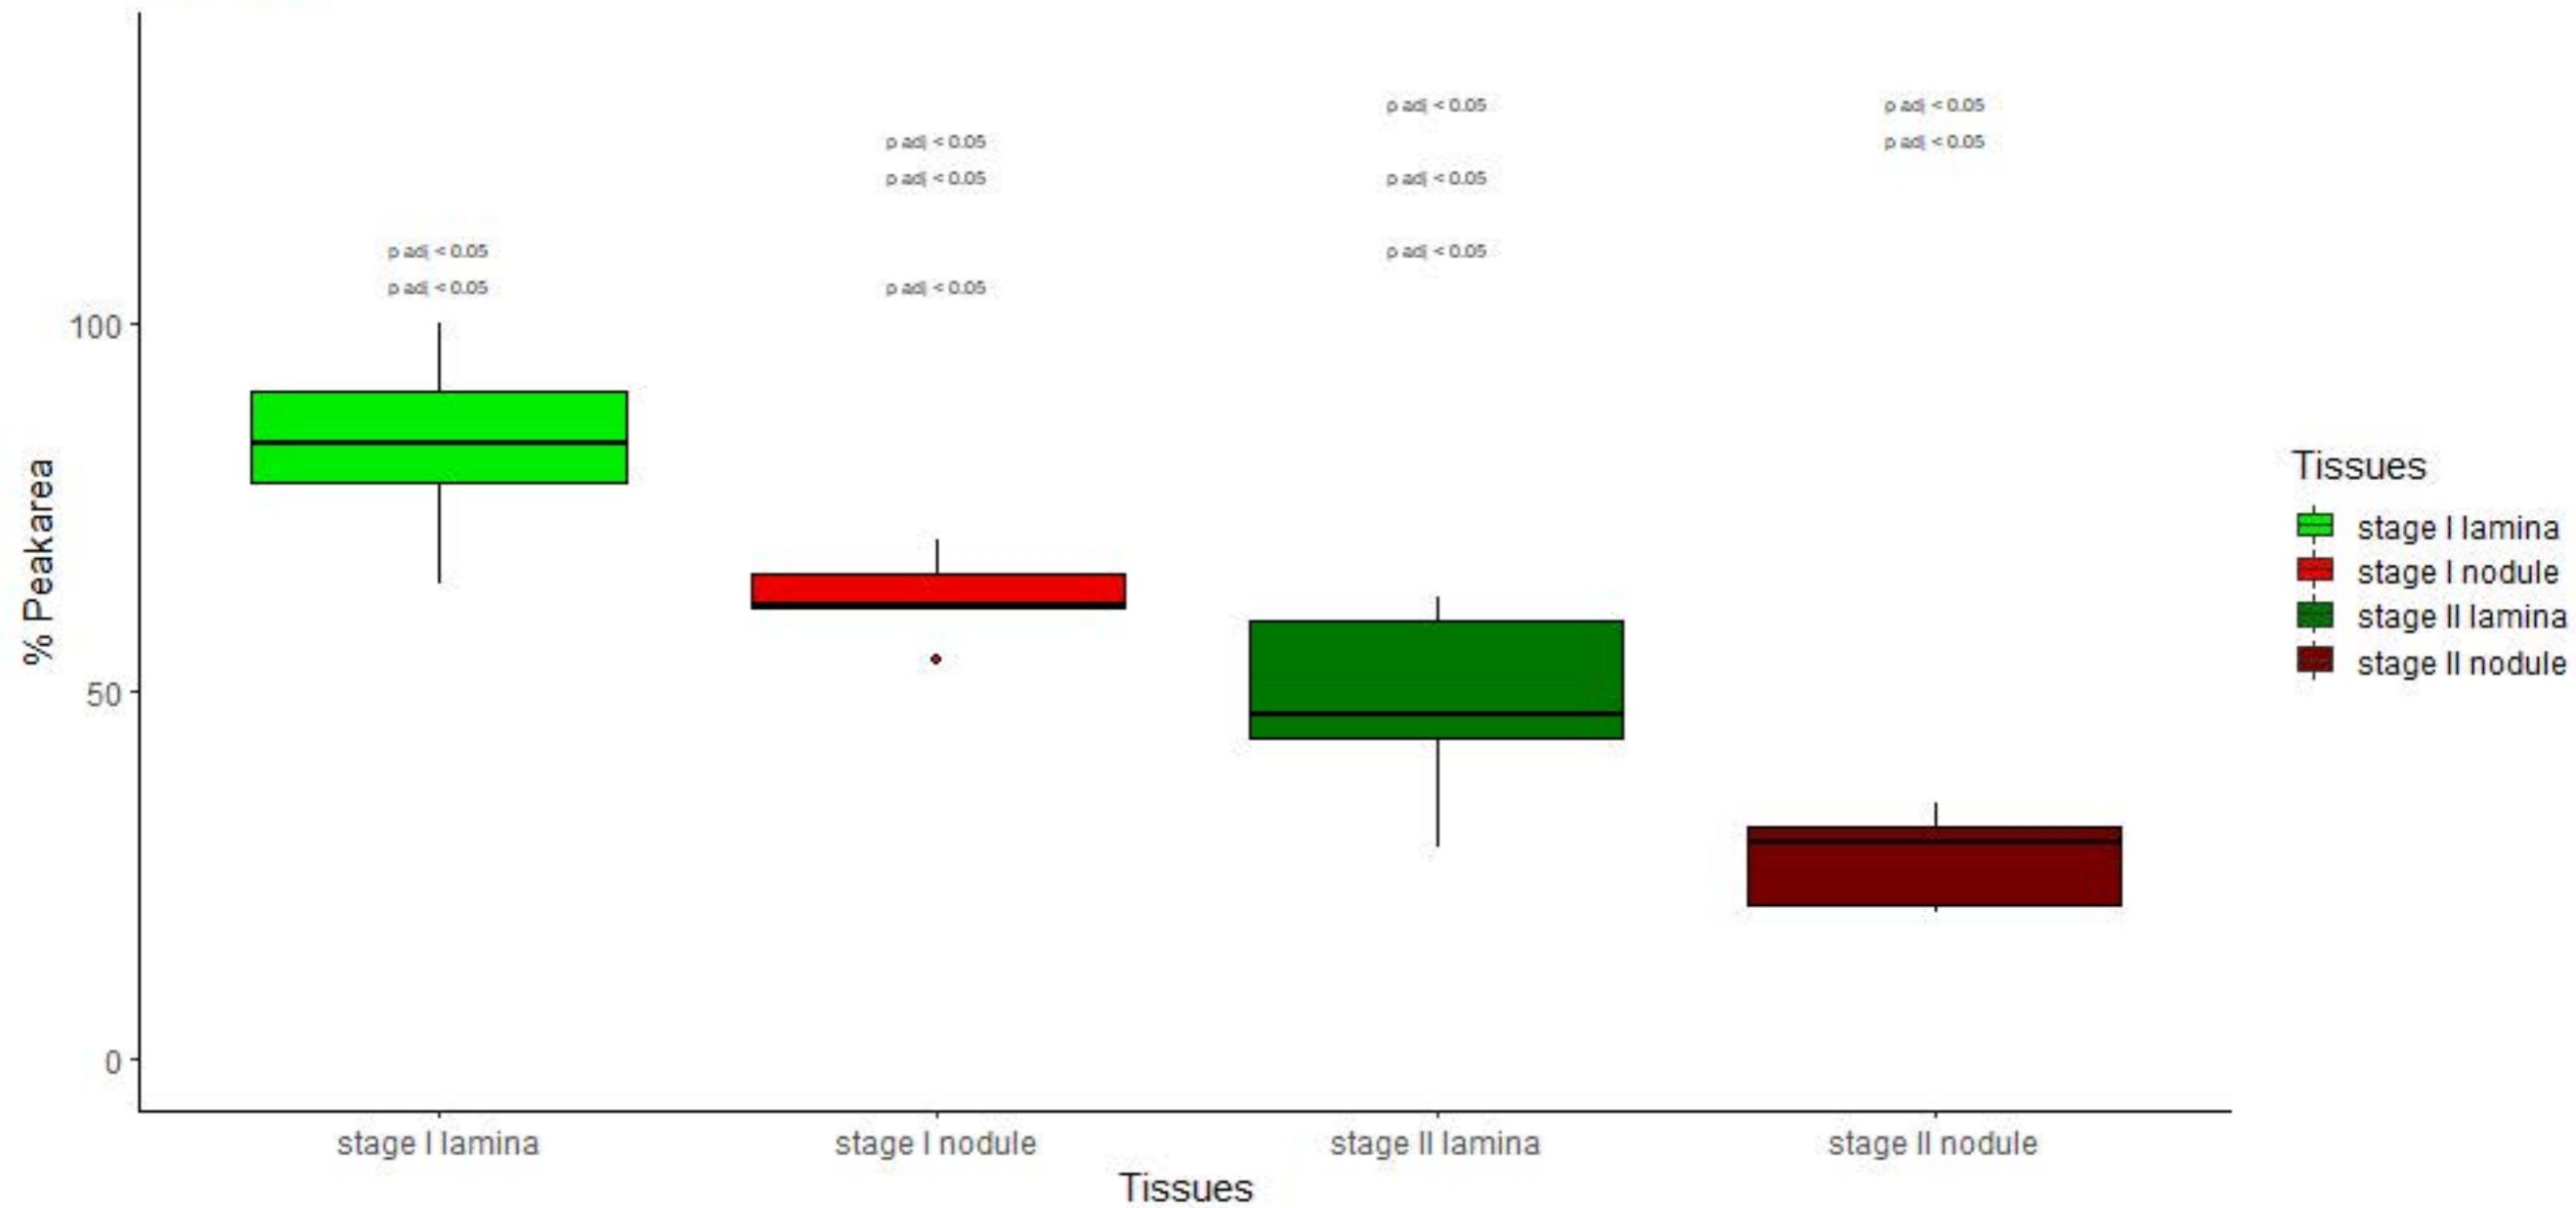

NA 2

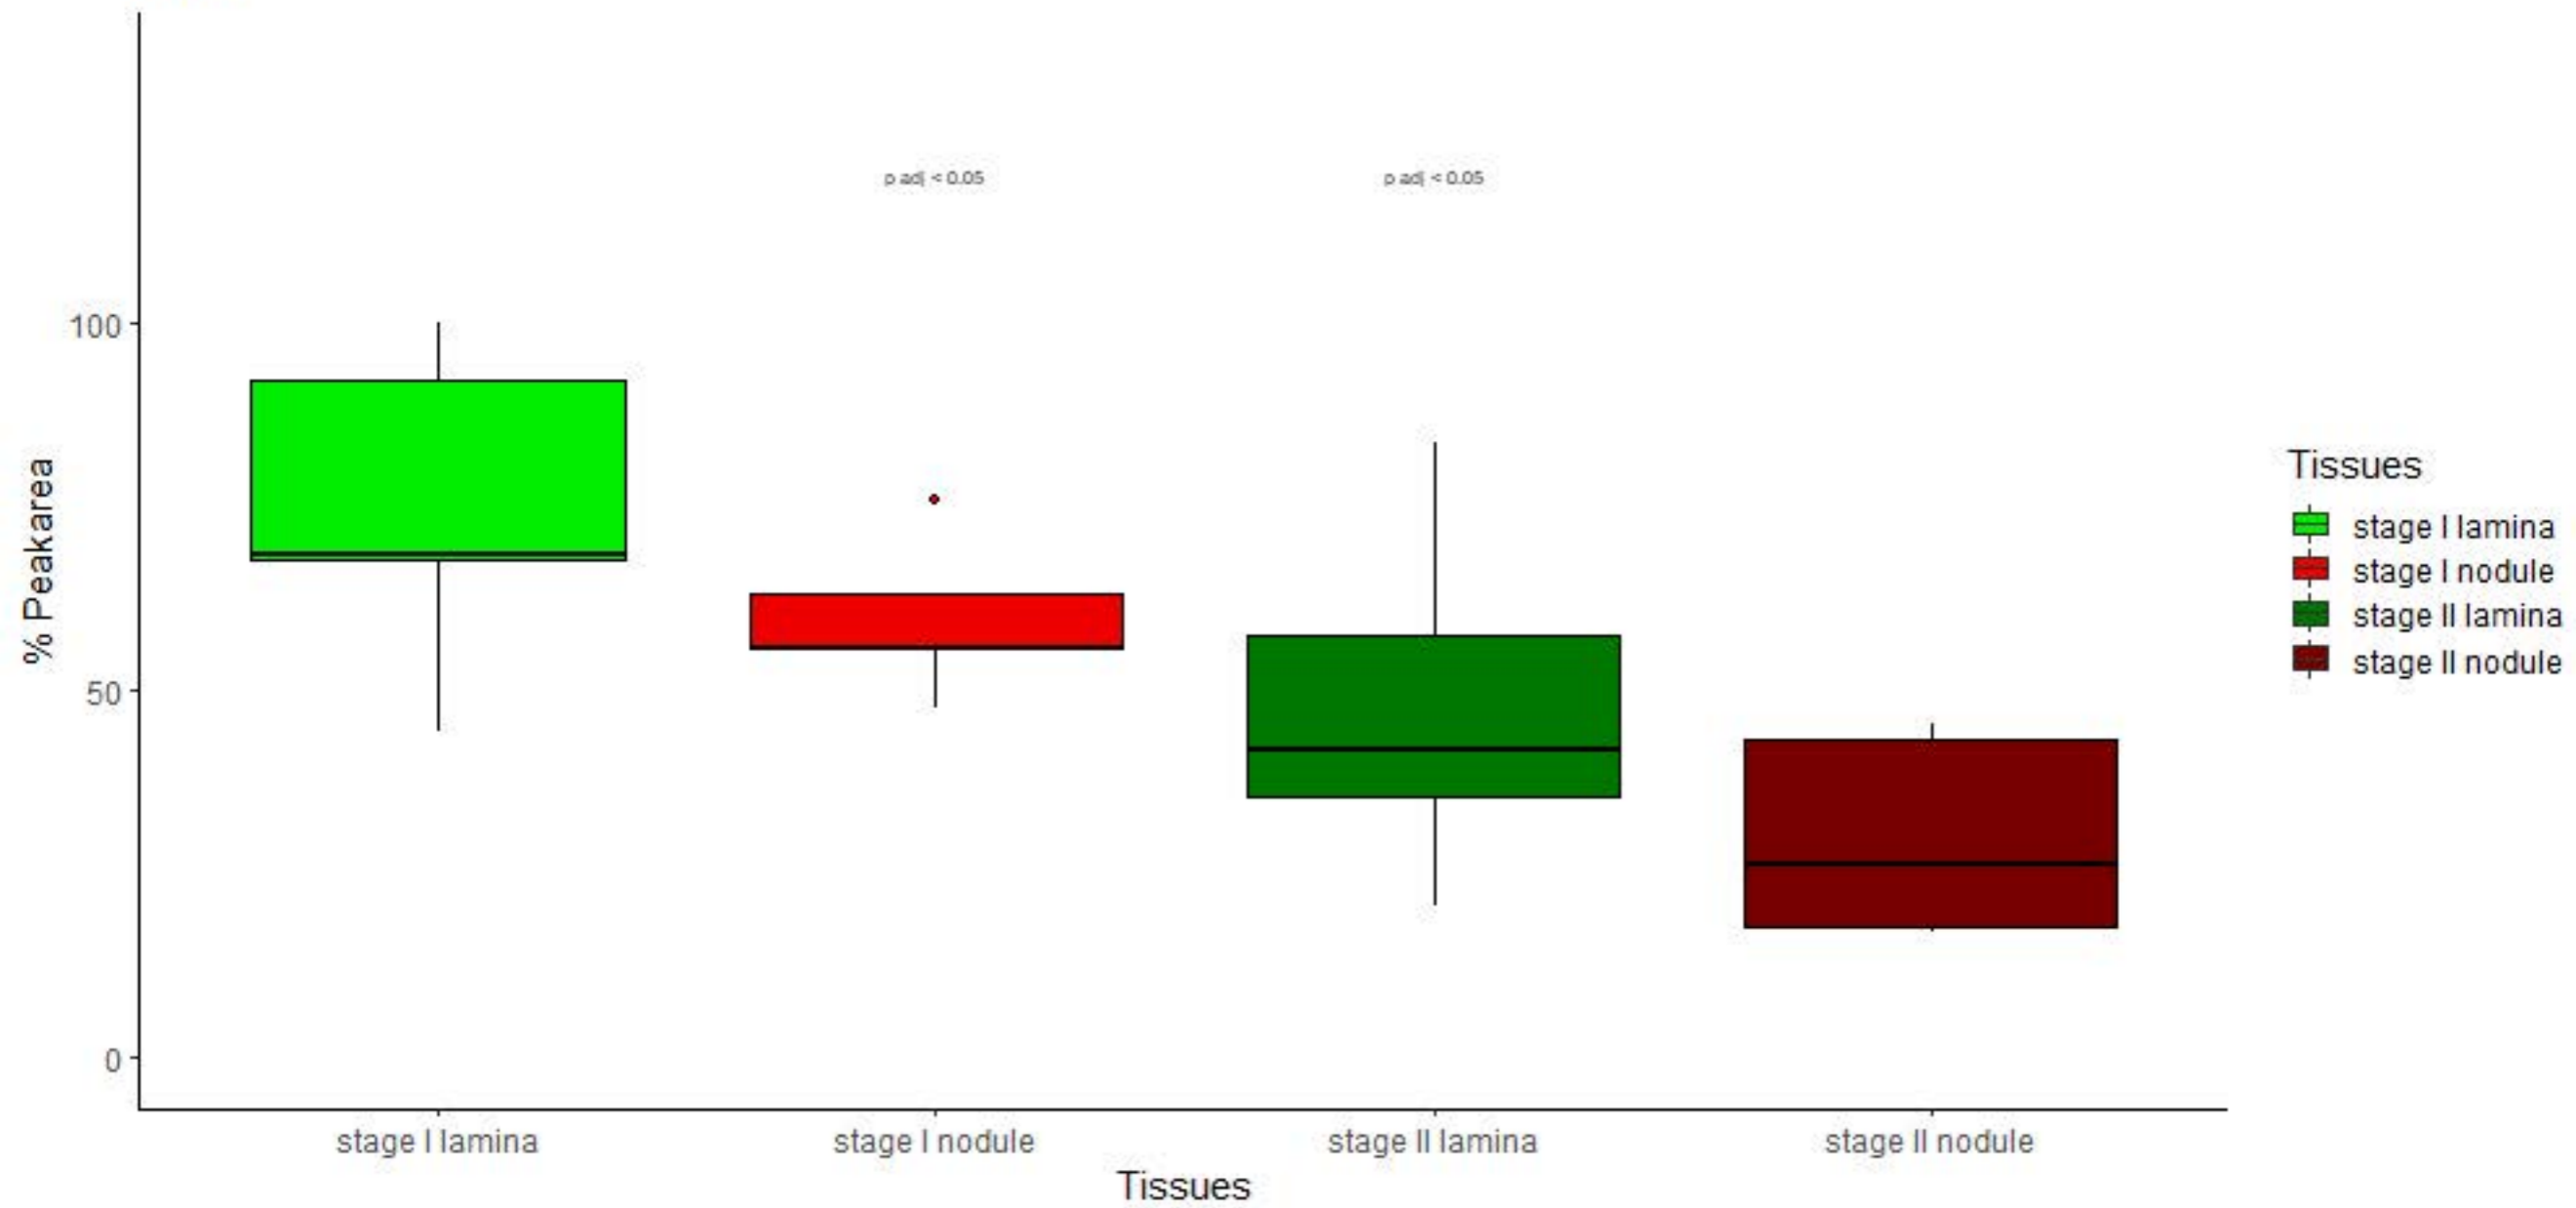

NA 29

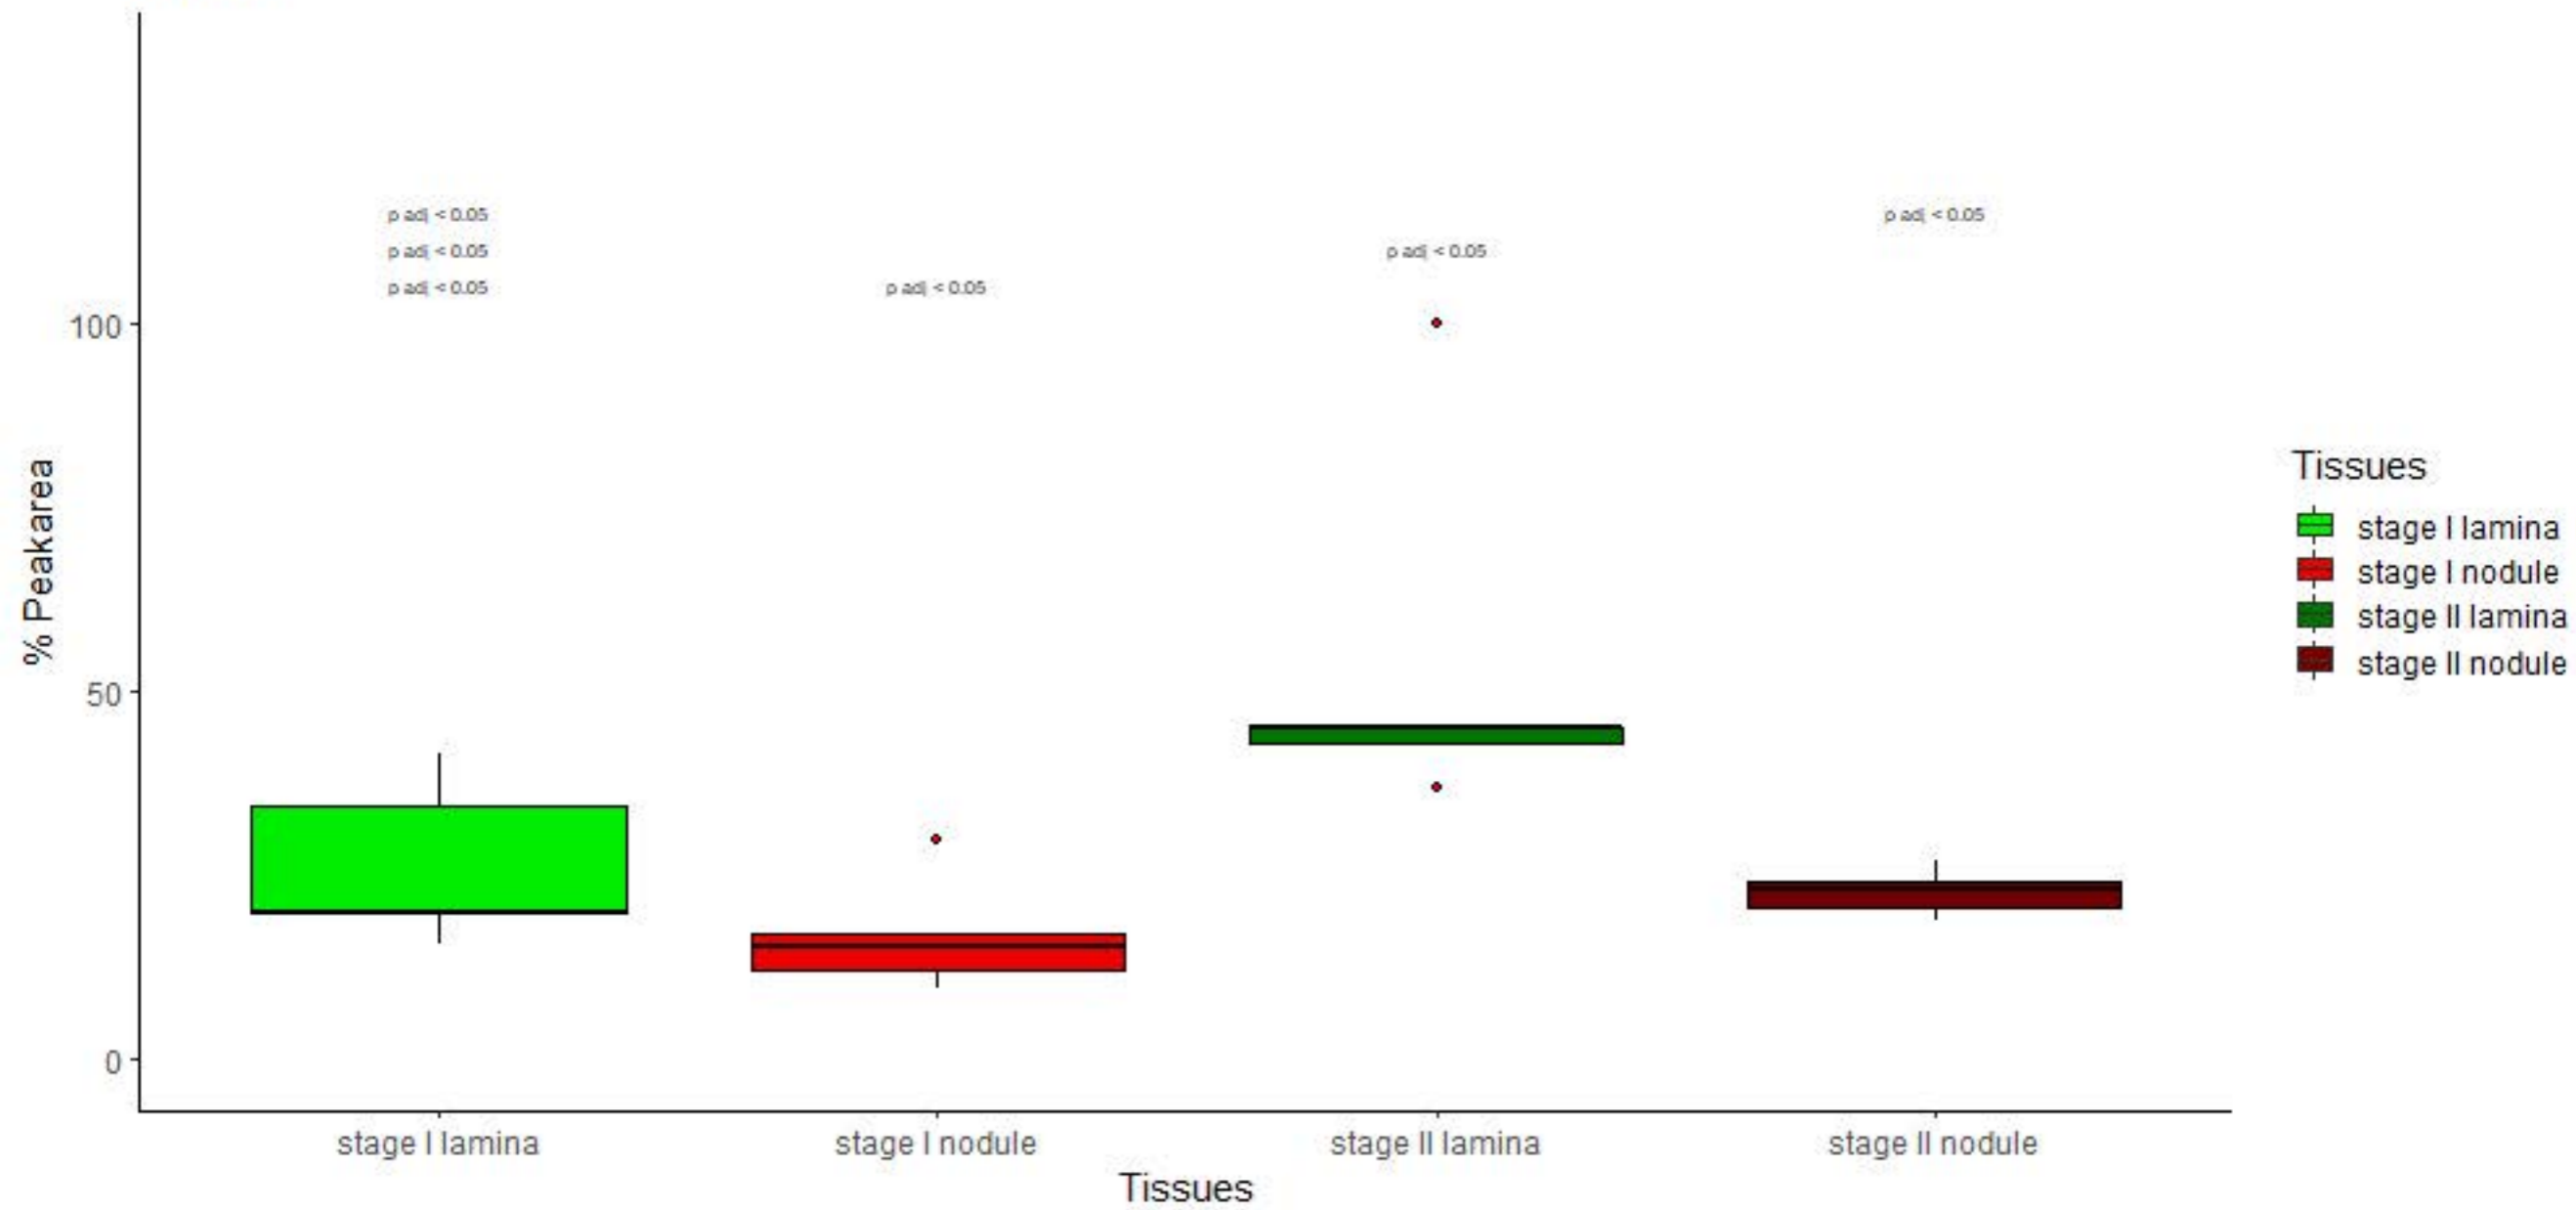

NA 47

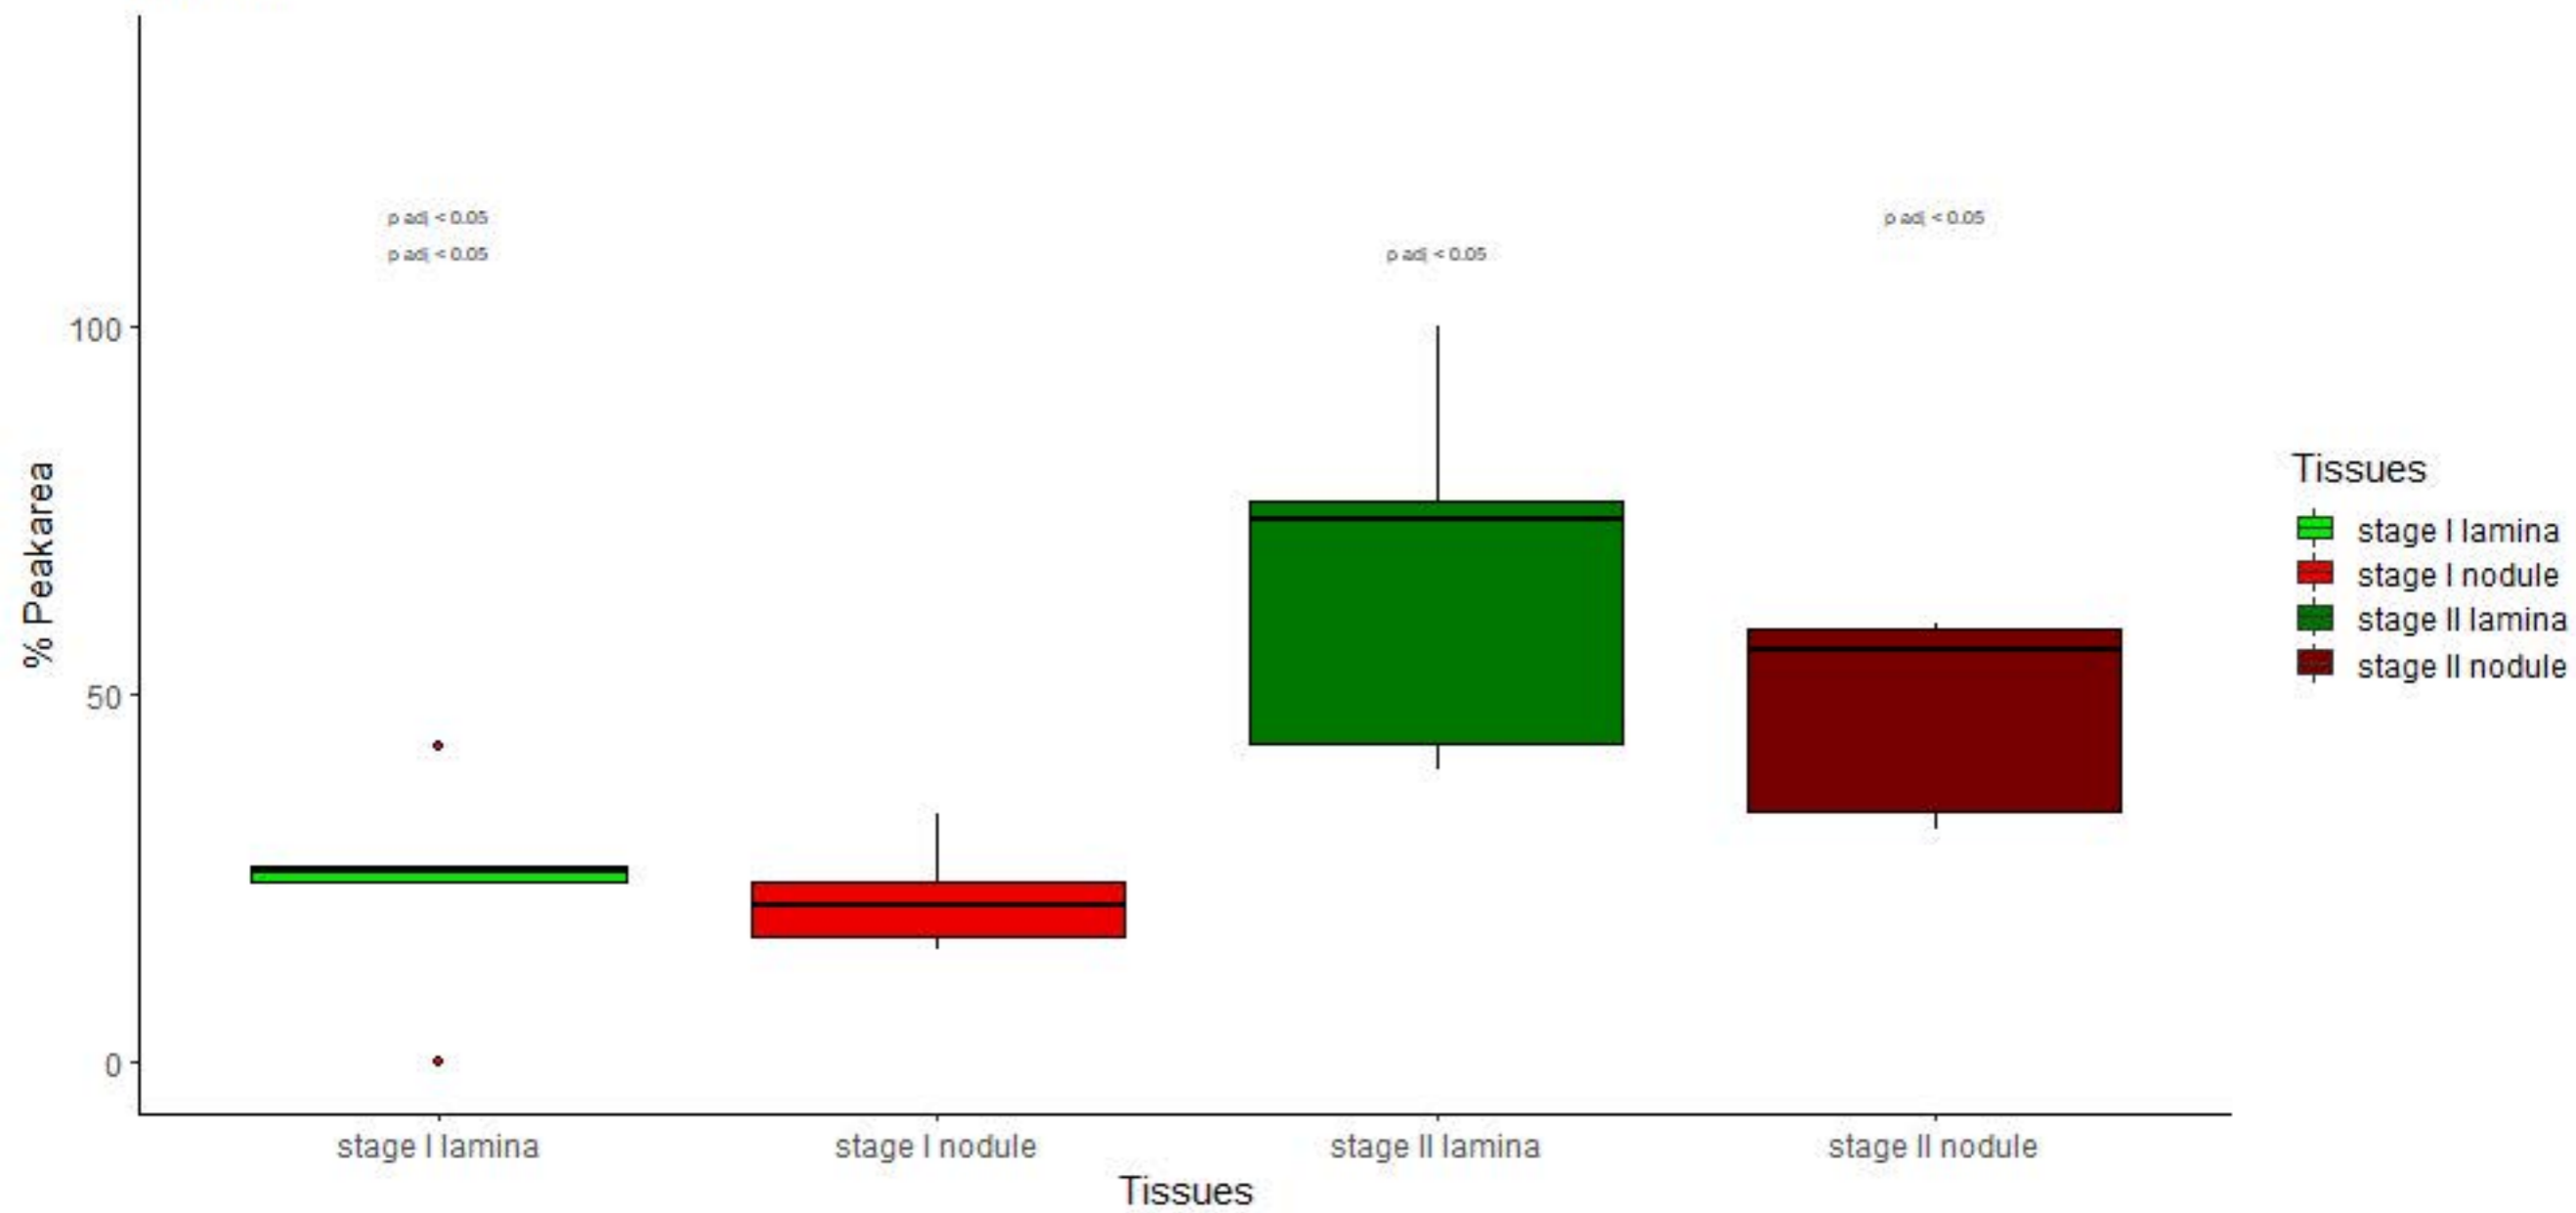



NA 67

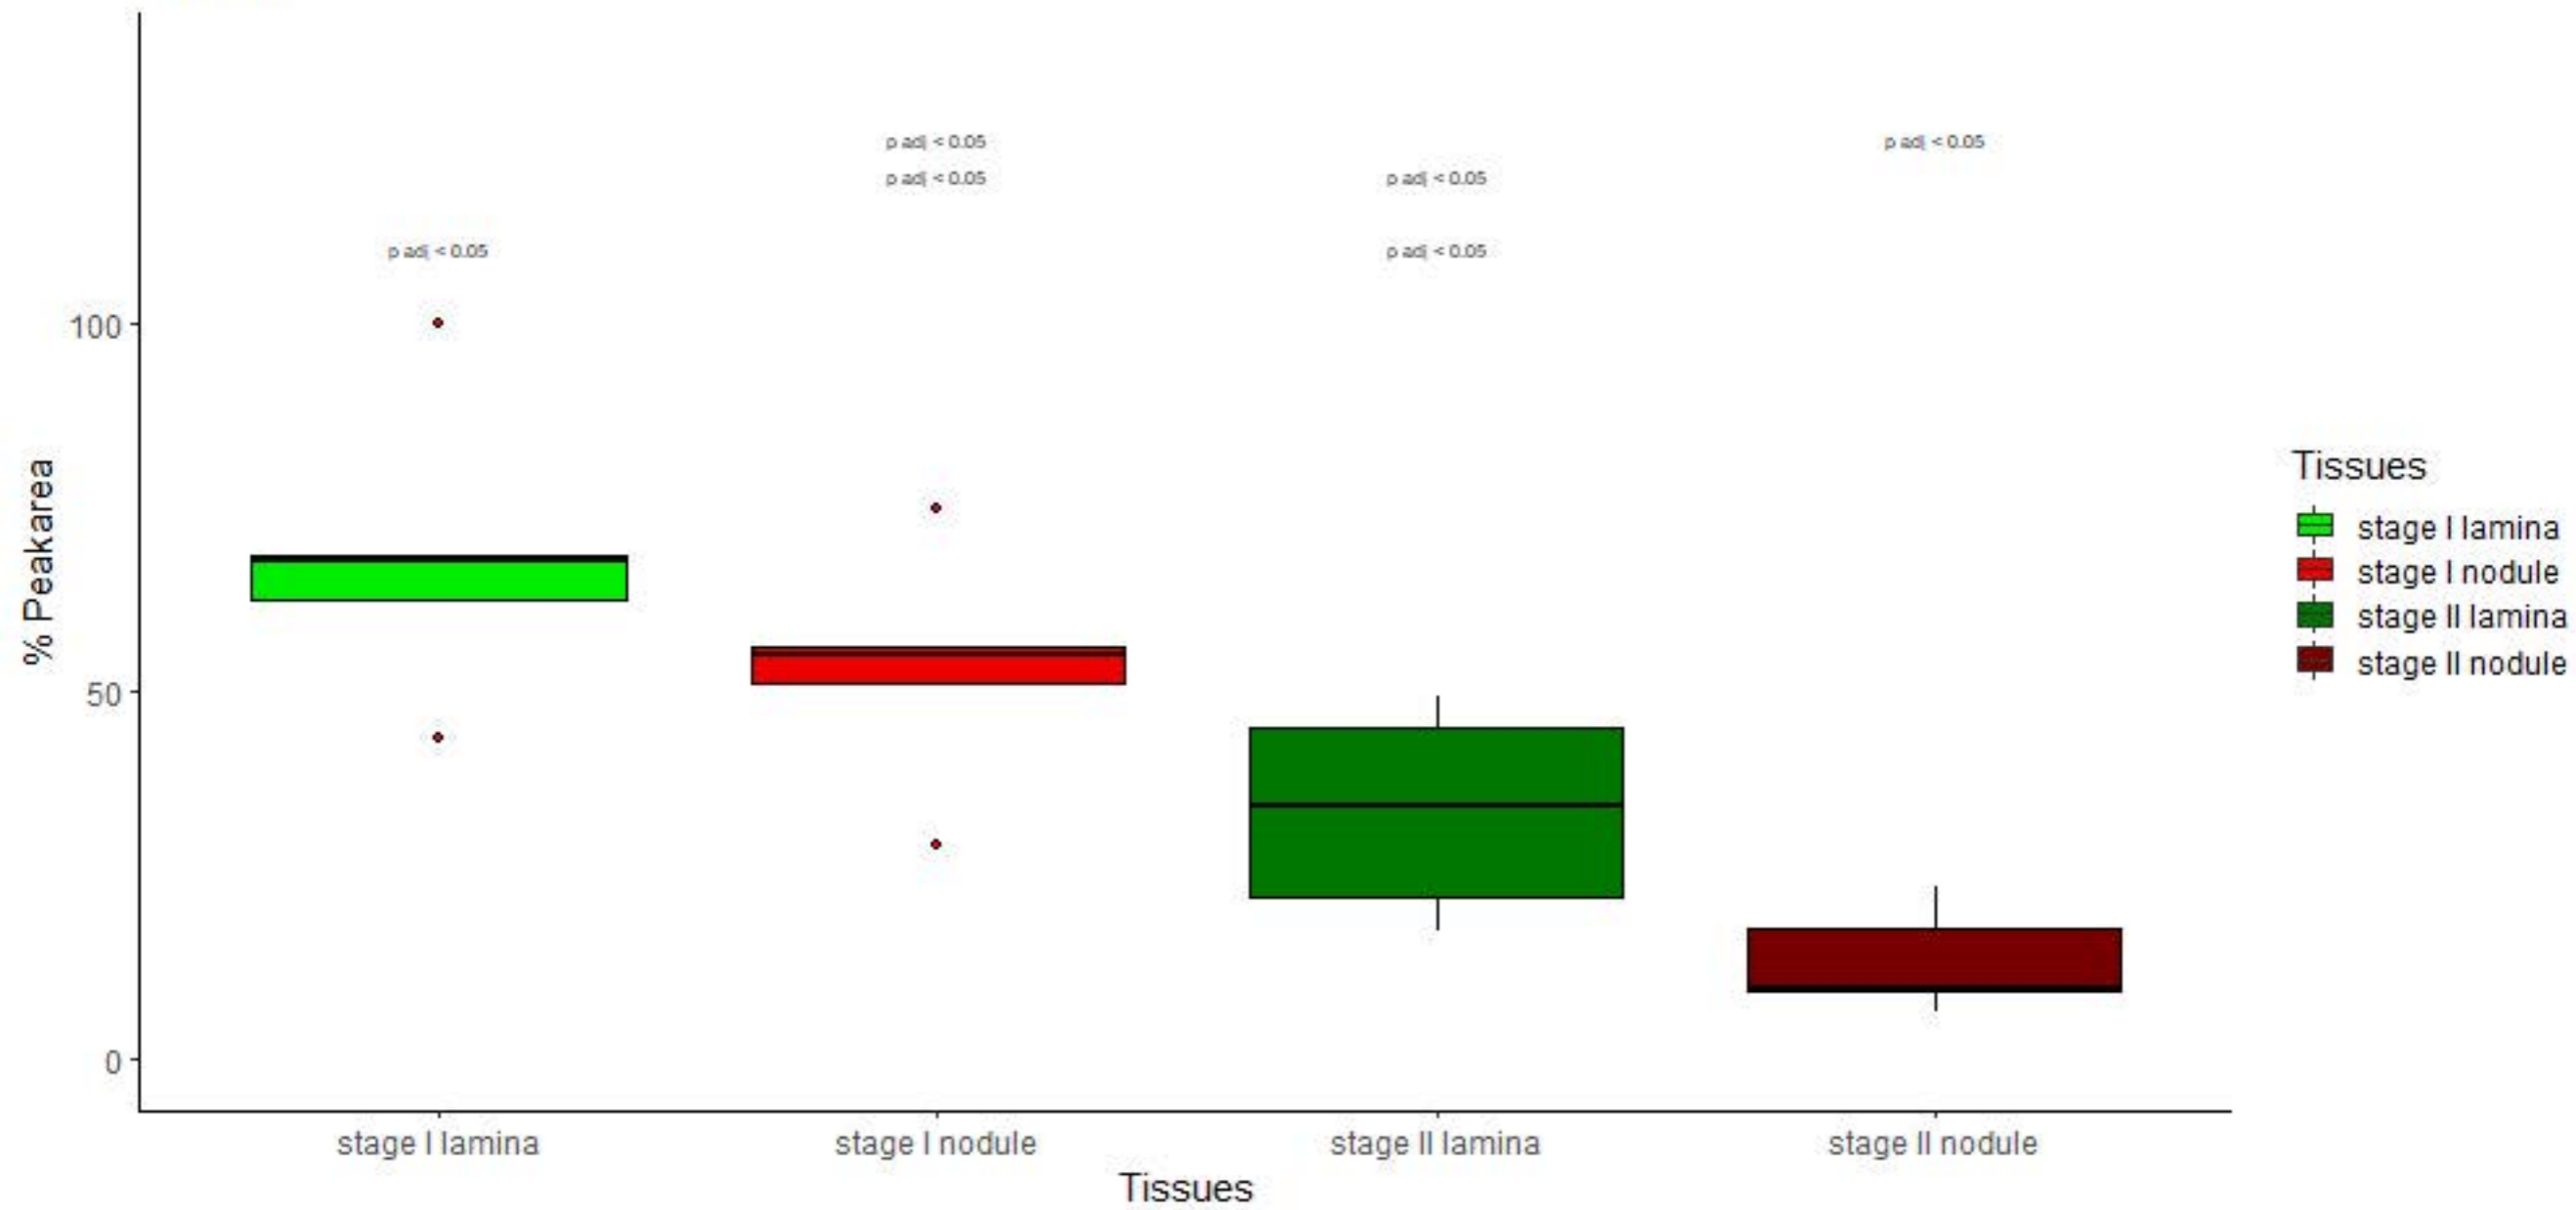

NA 100

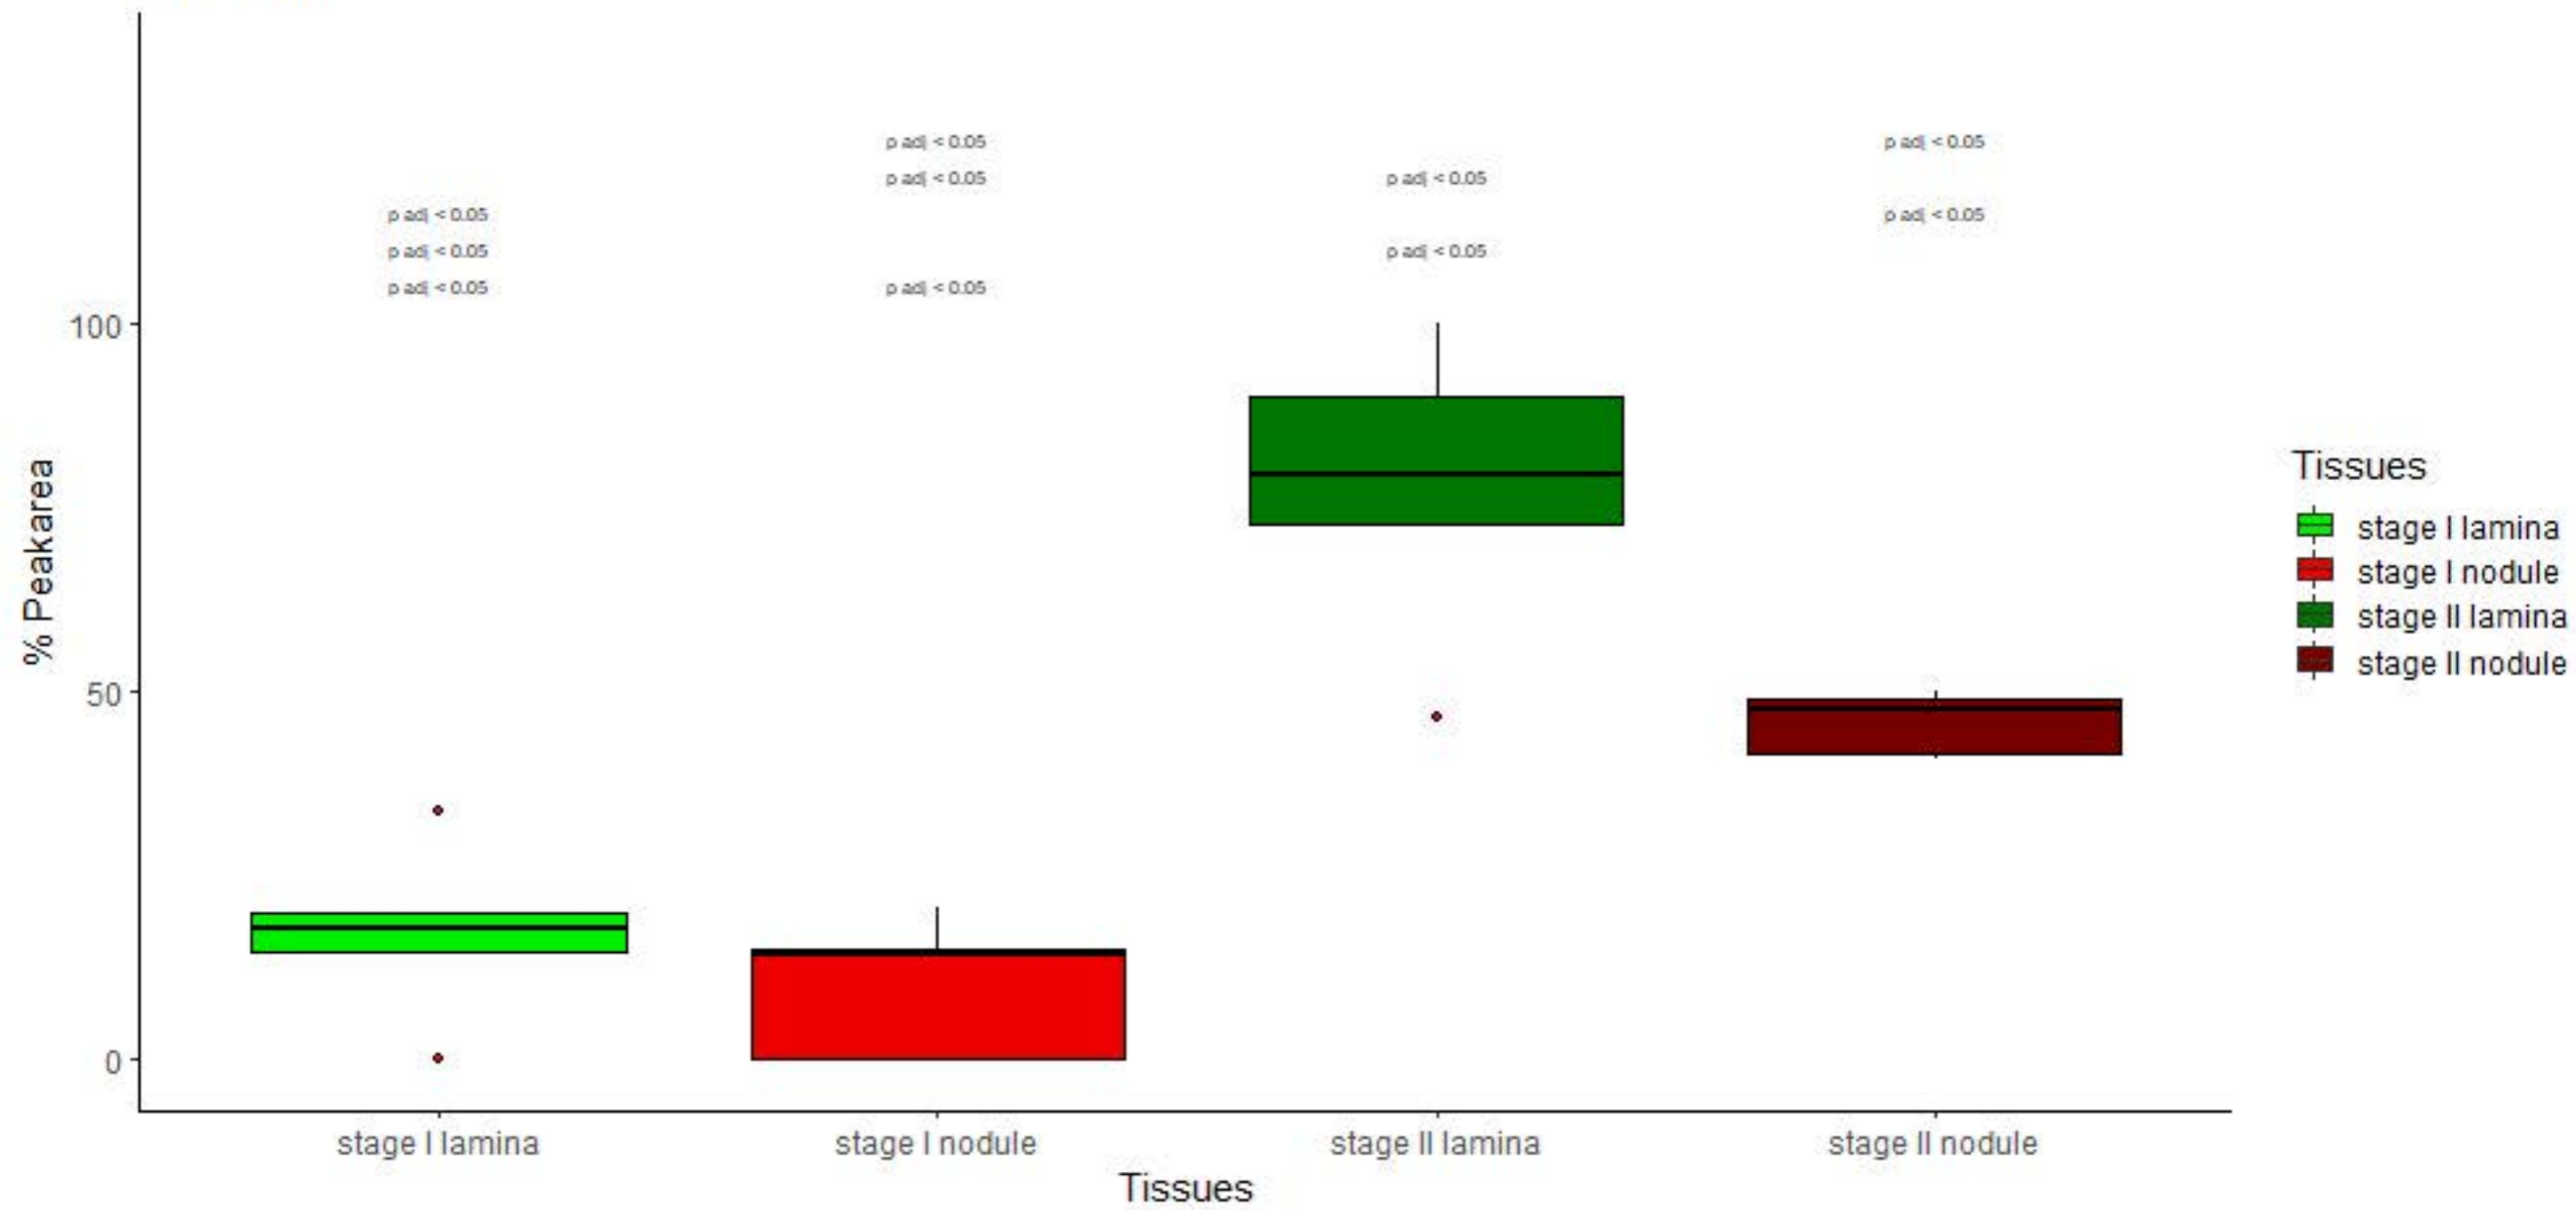

NA 127

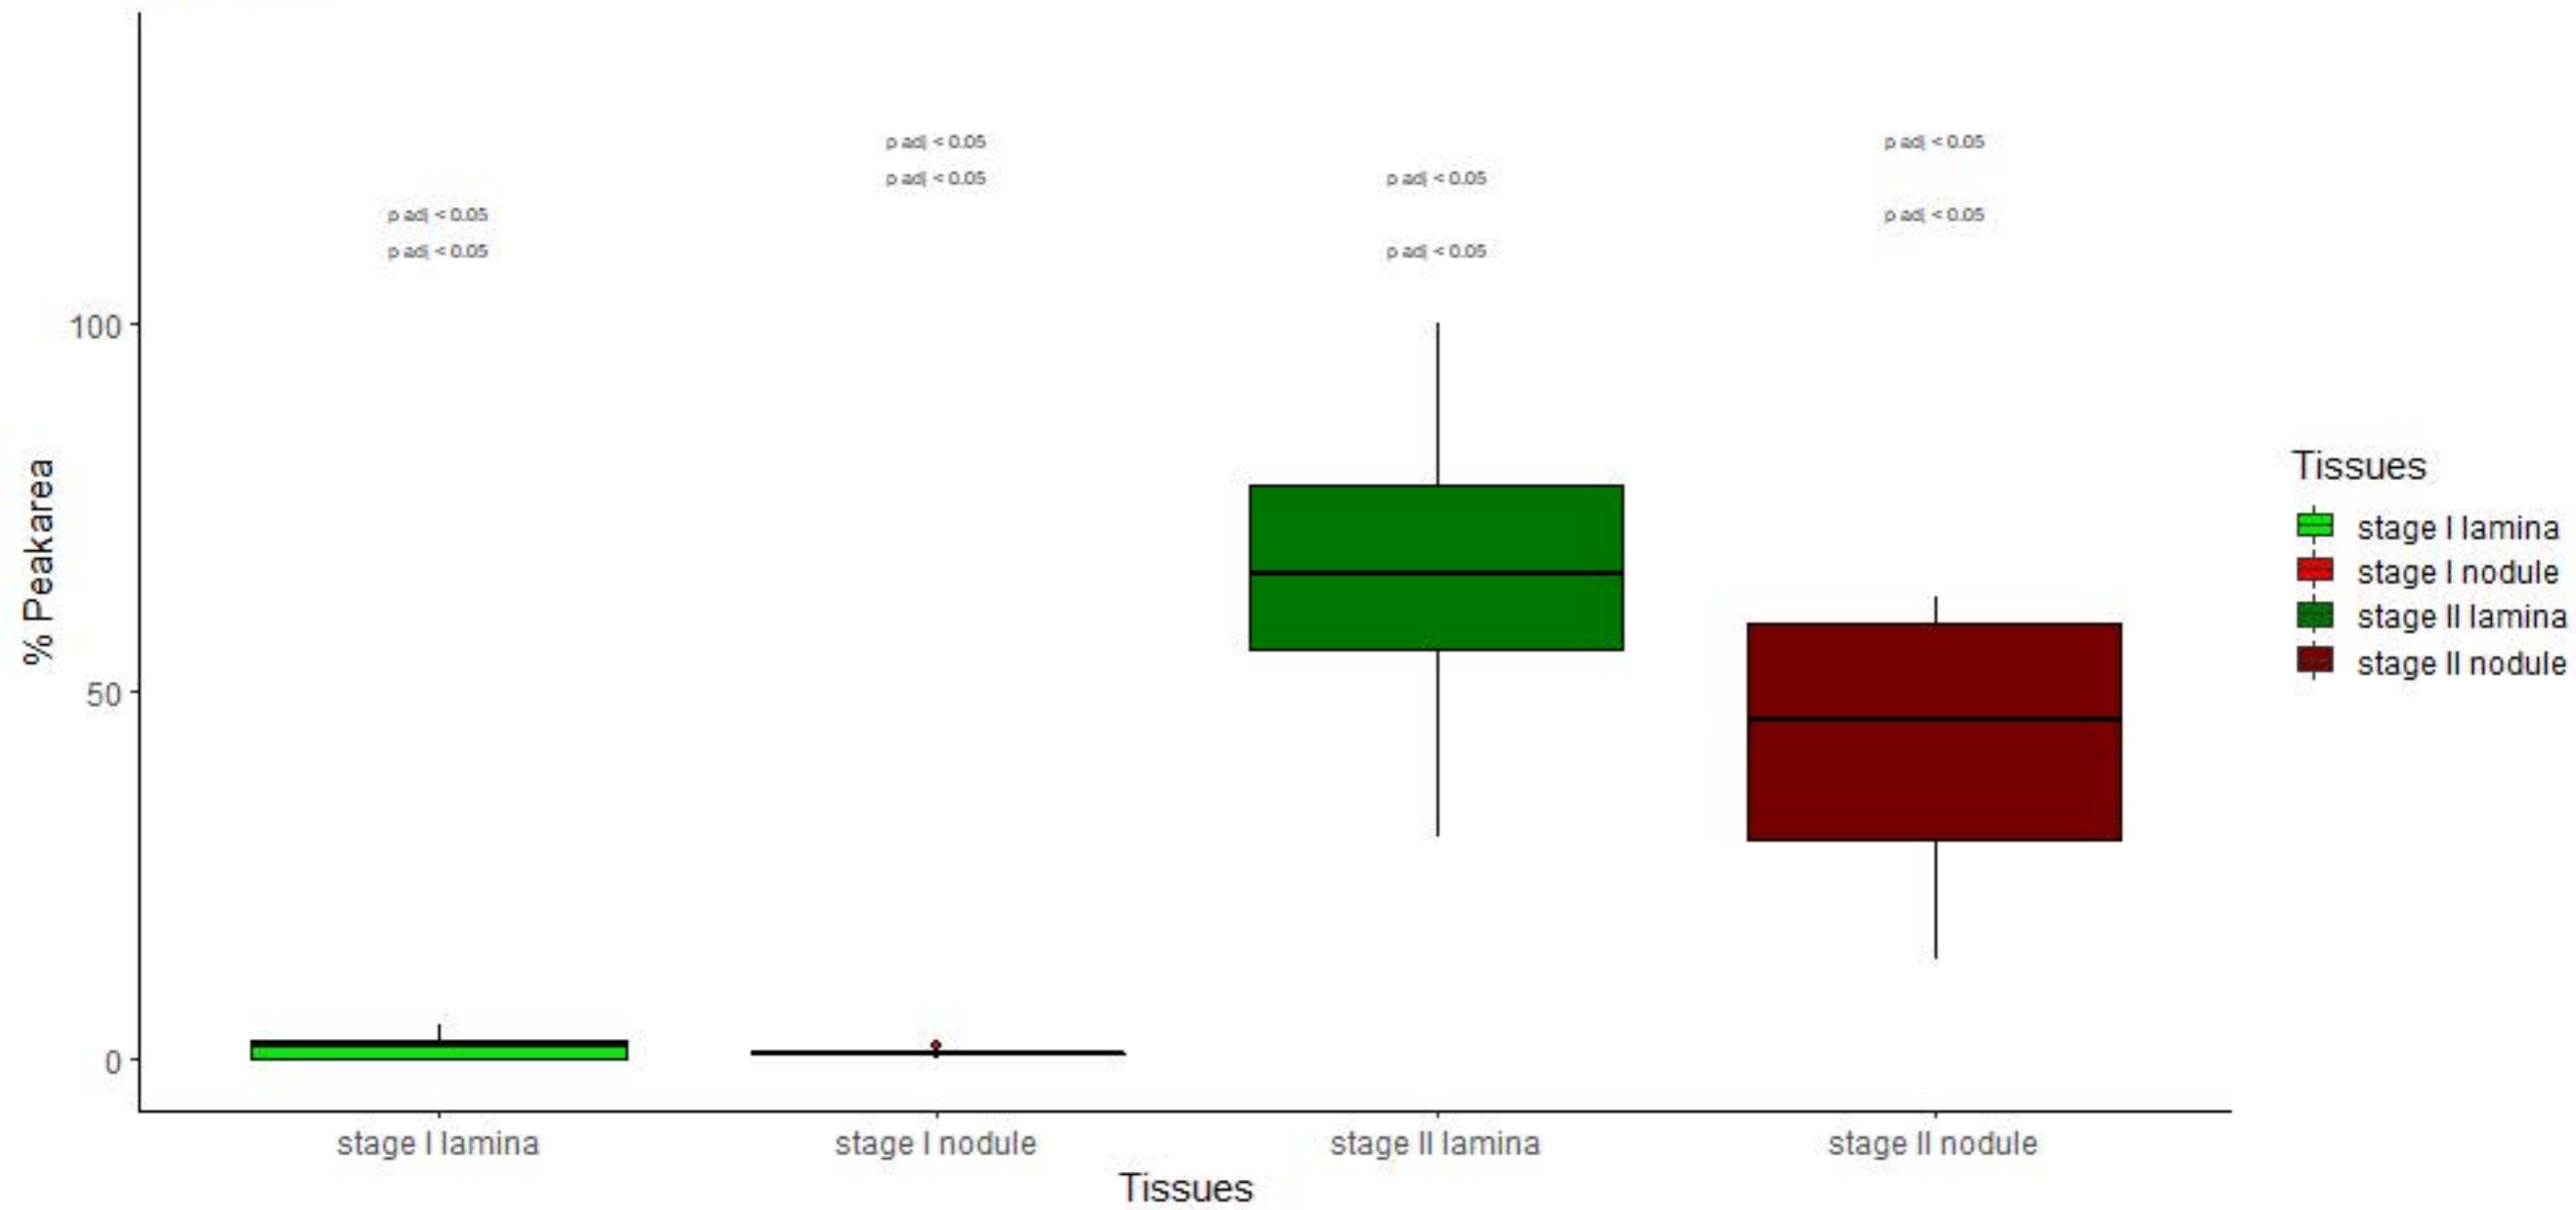

NA 147

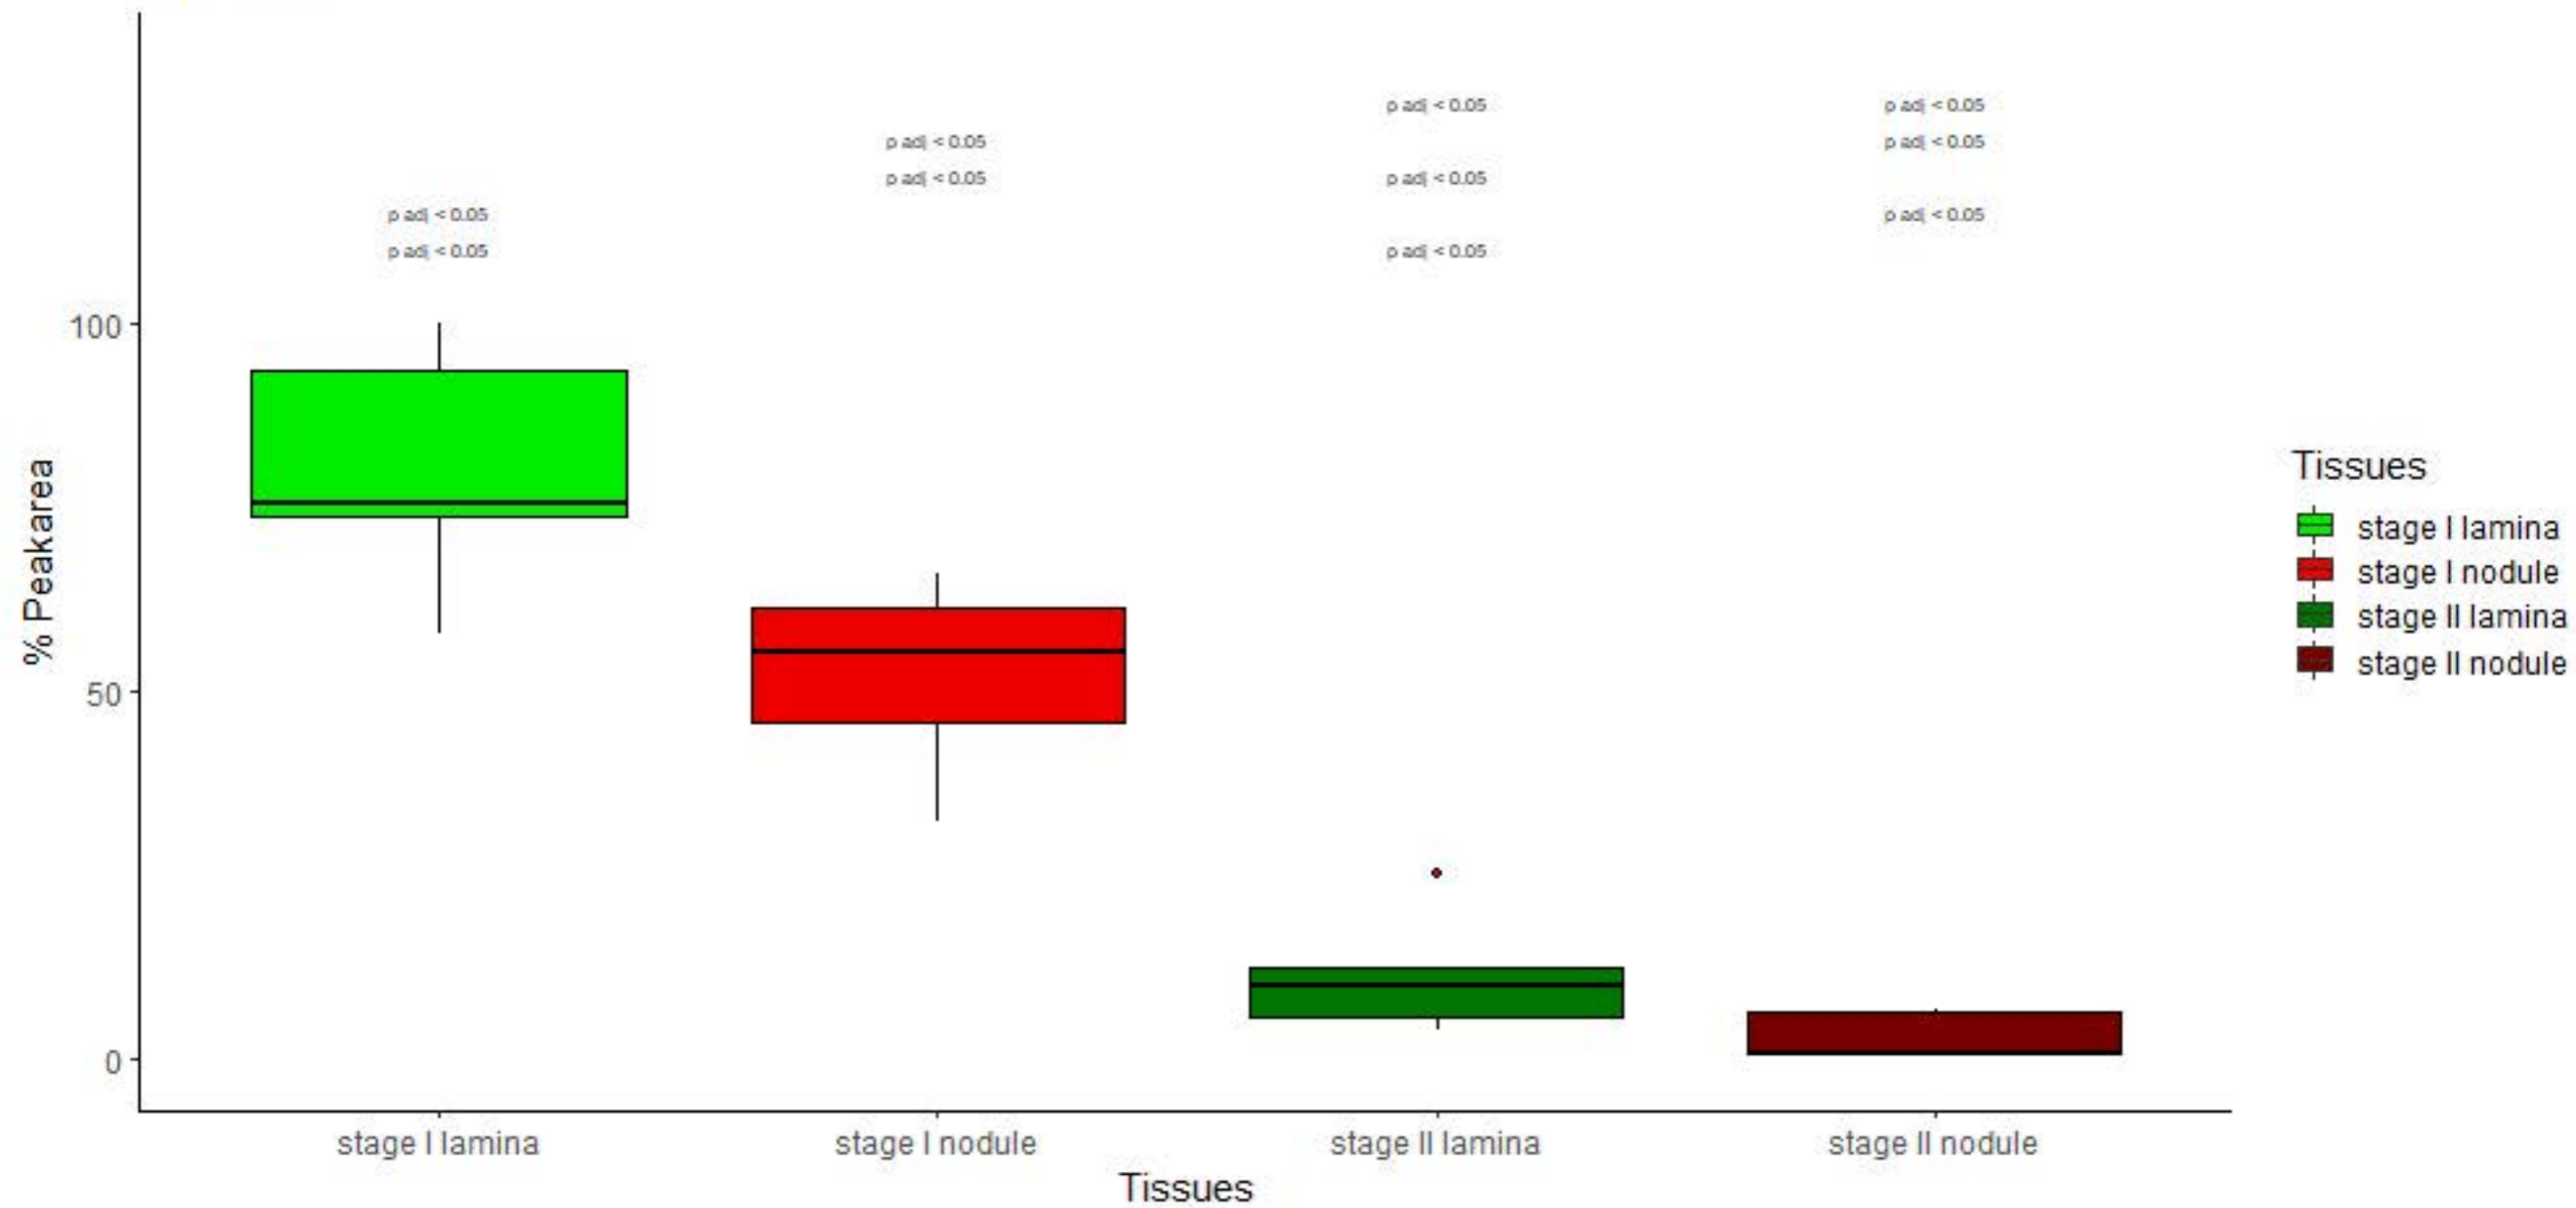

NA 148

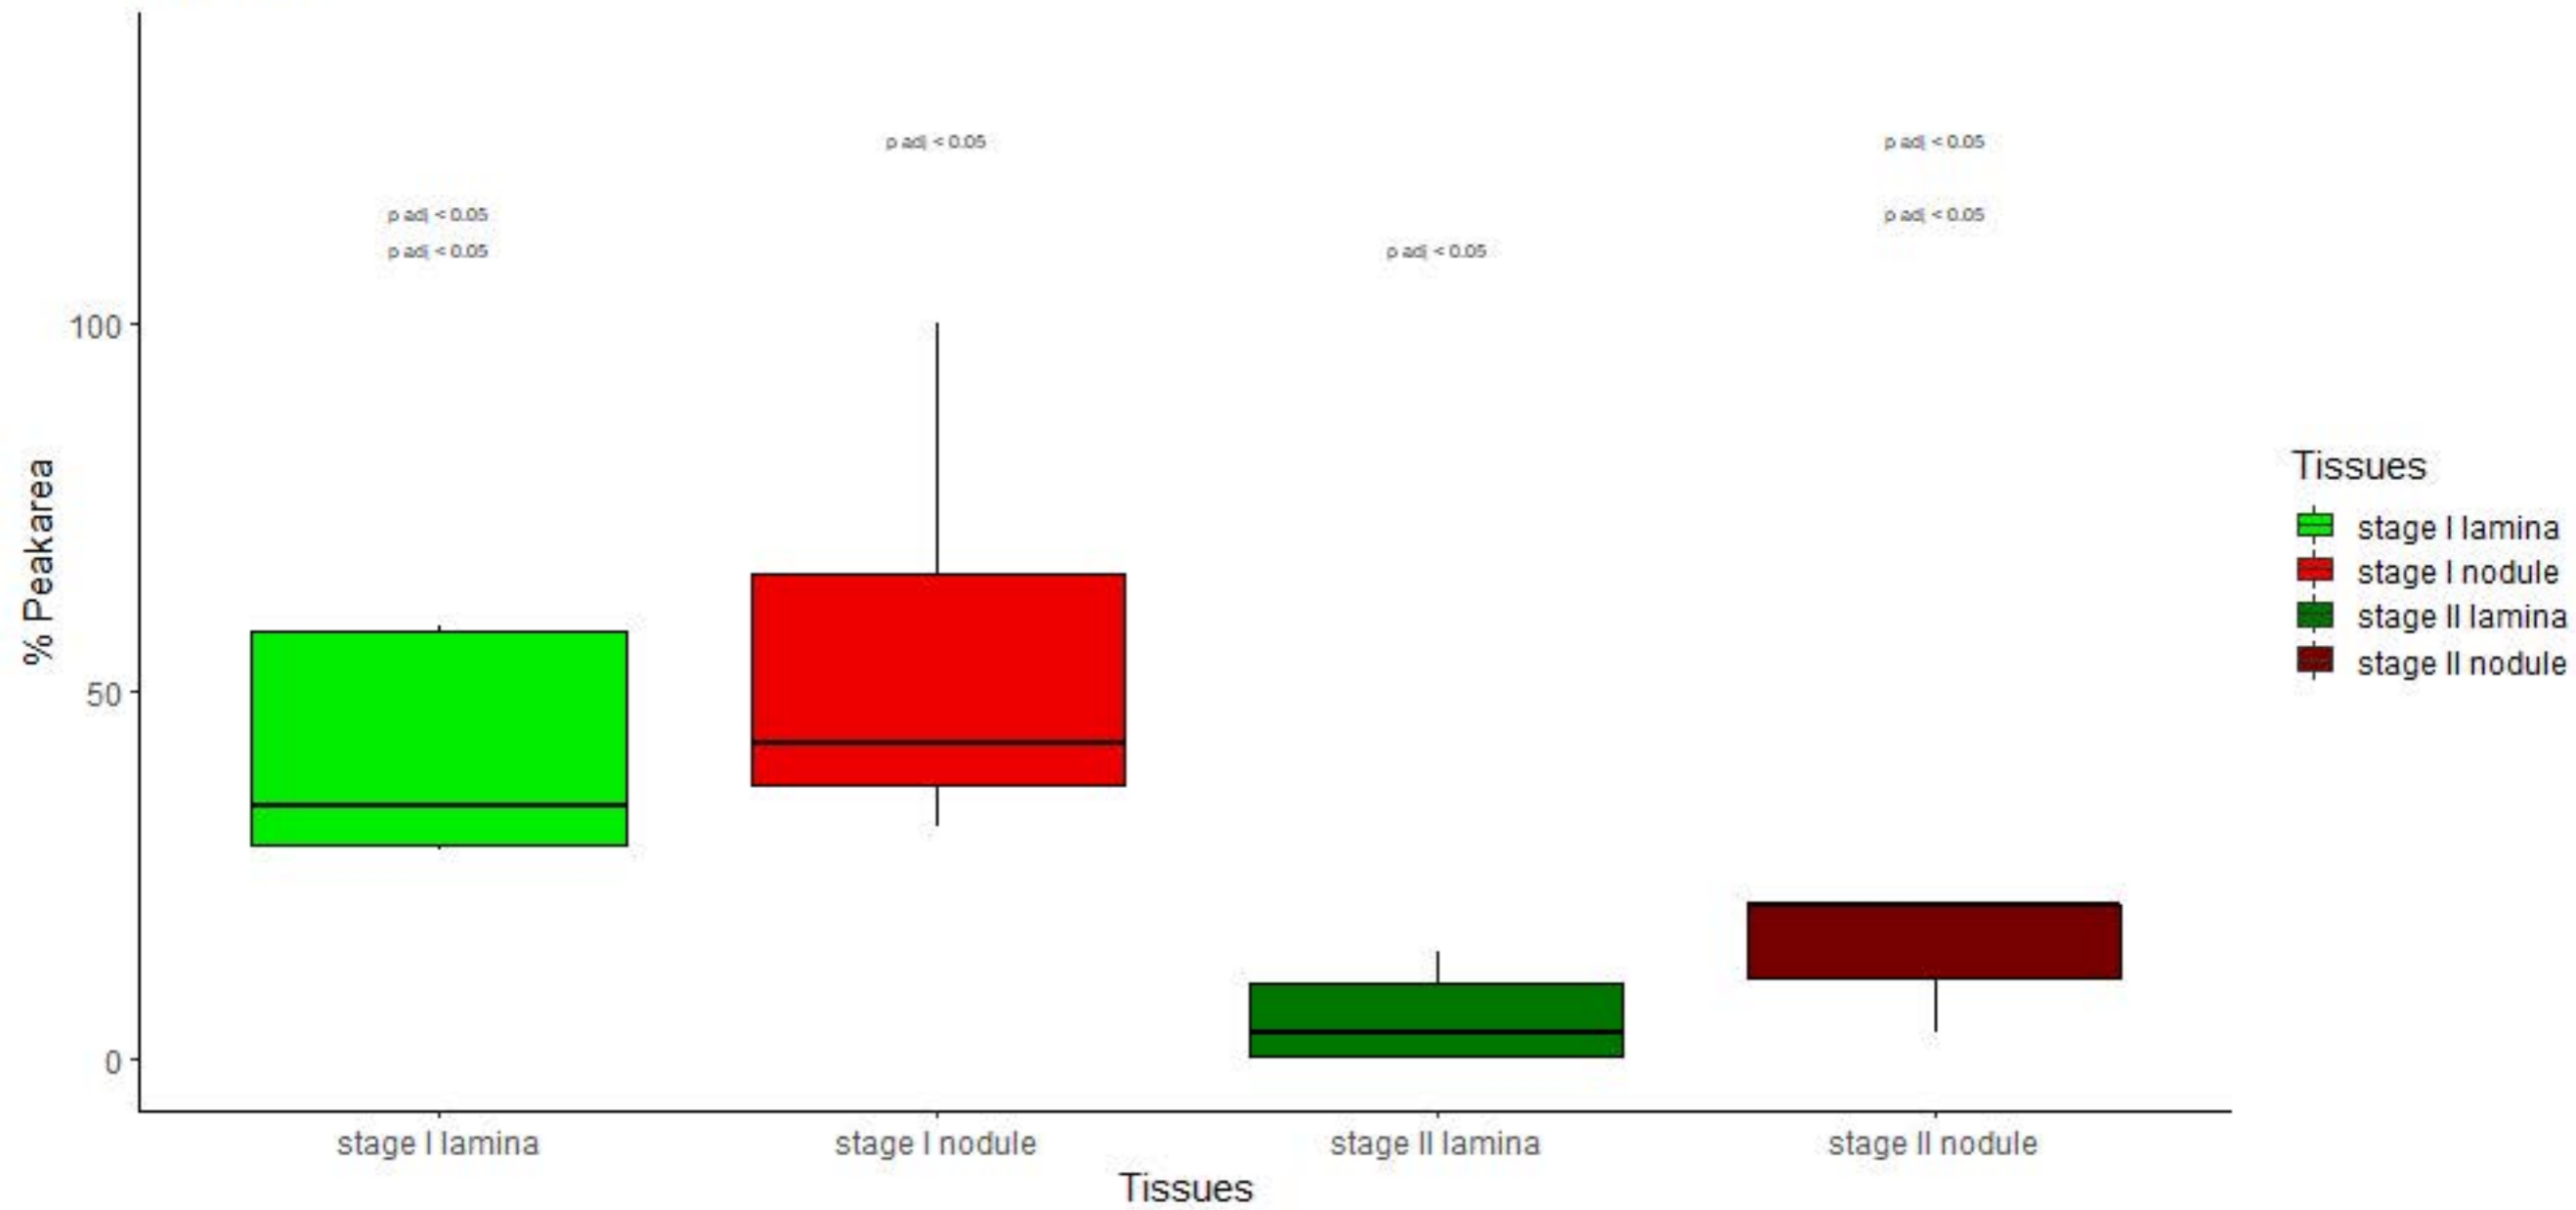

NA 152

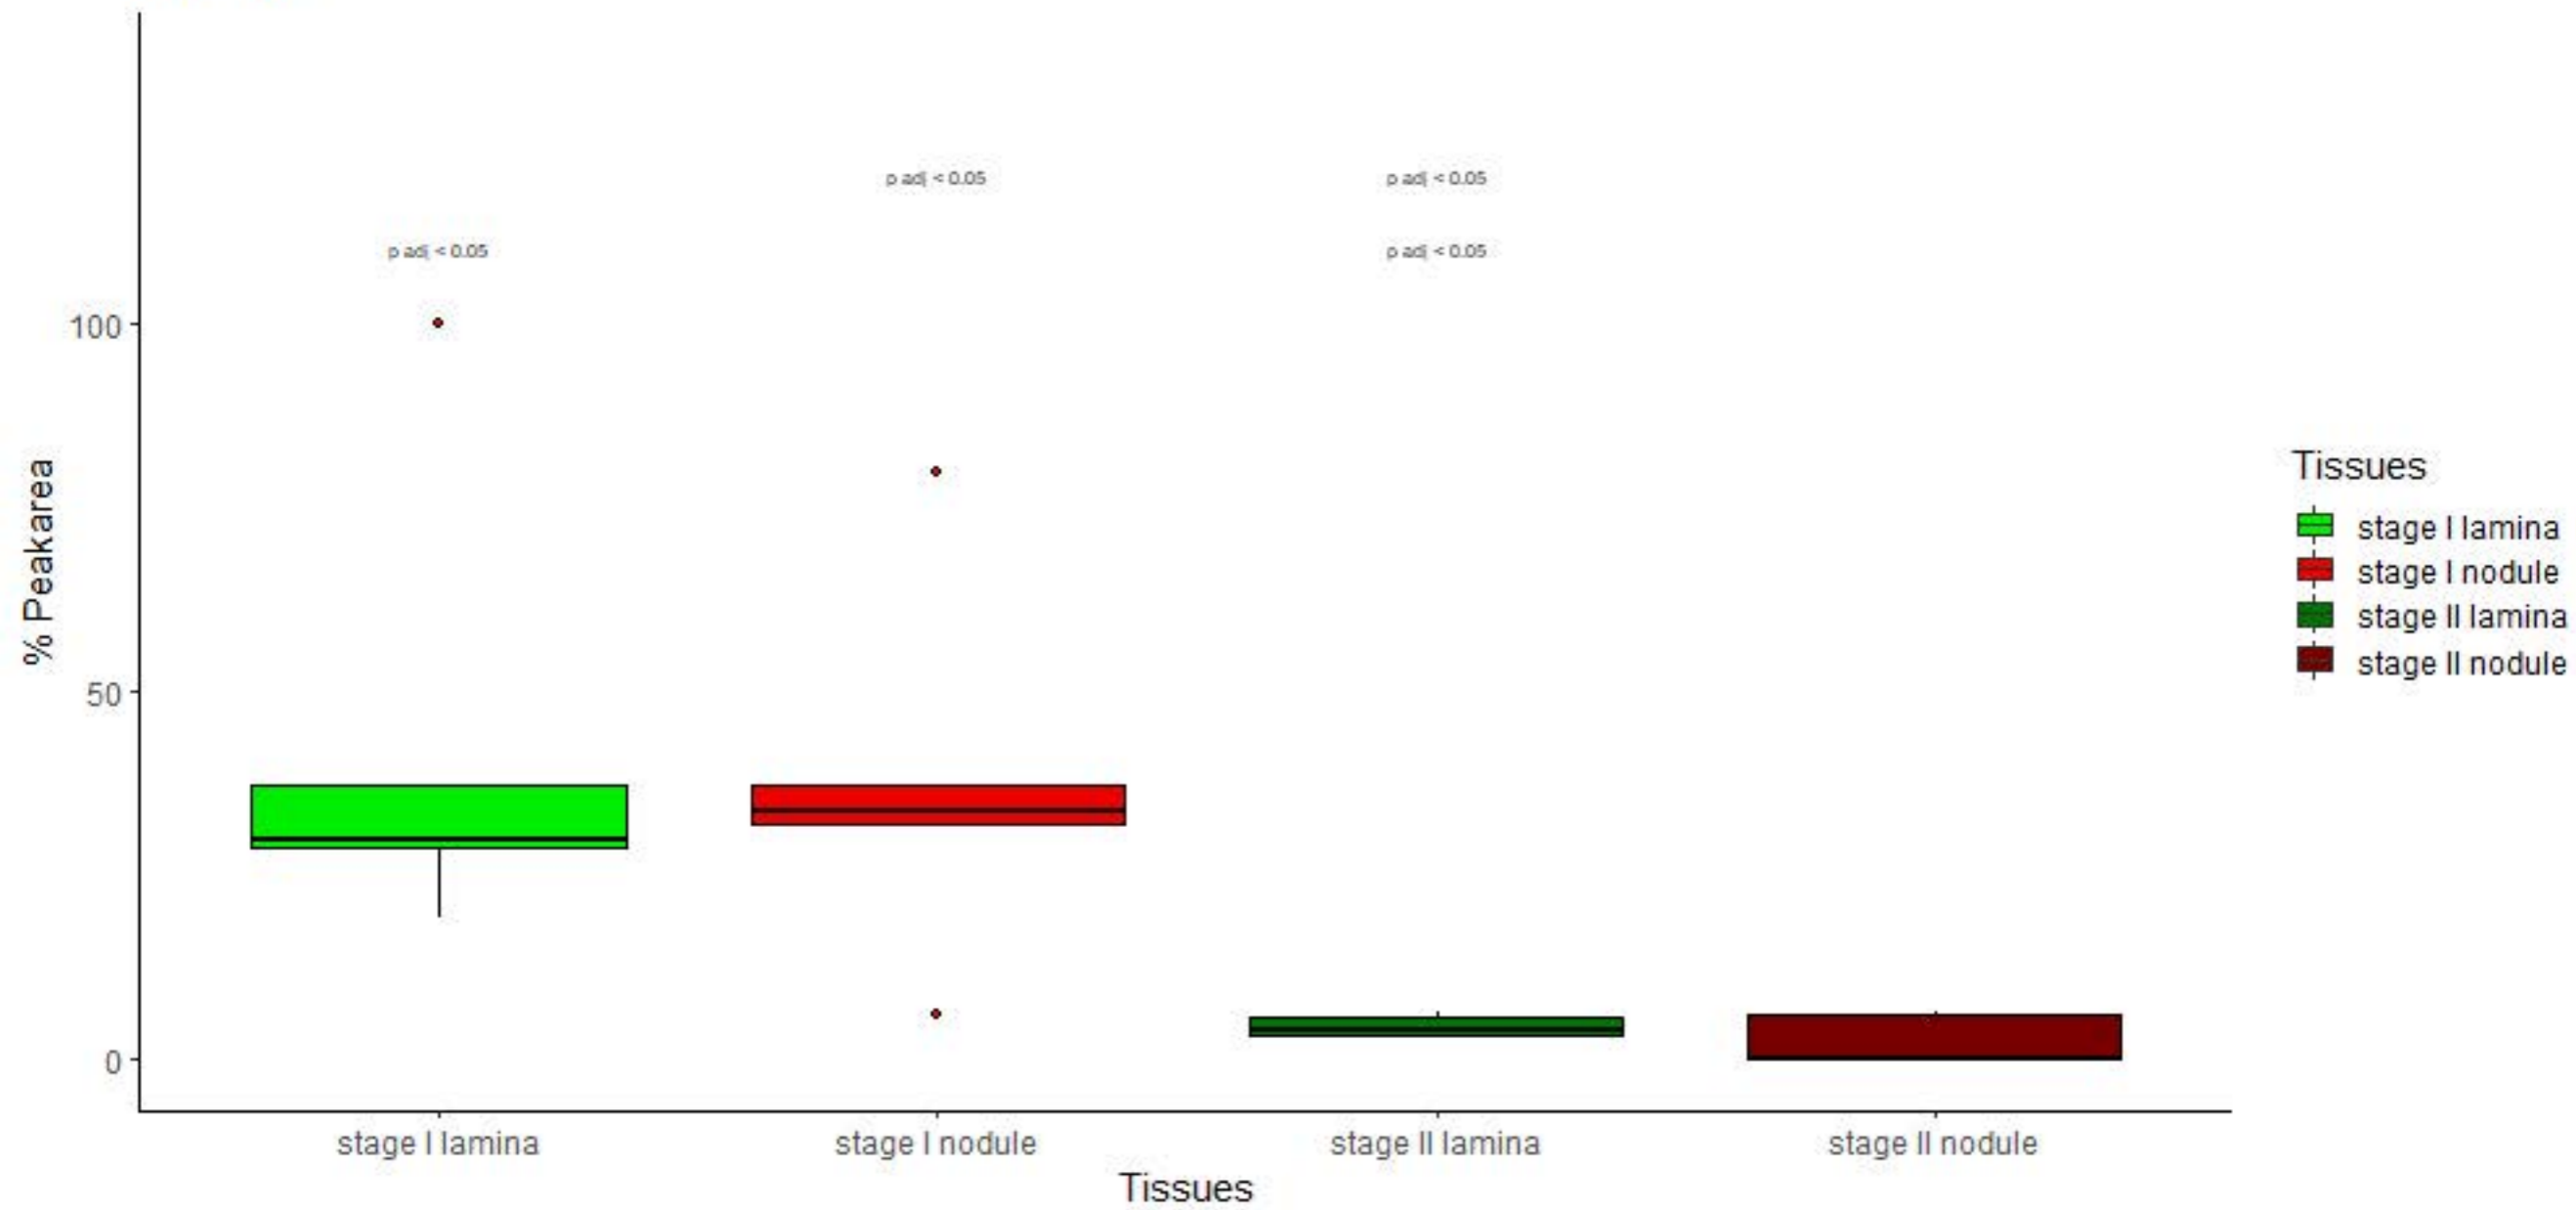

NA 18

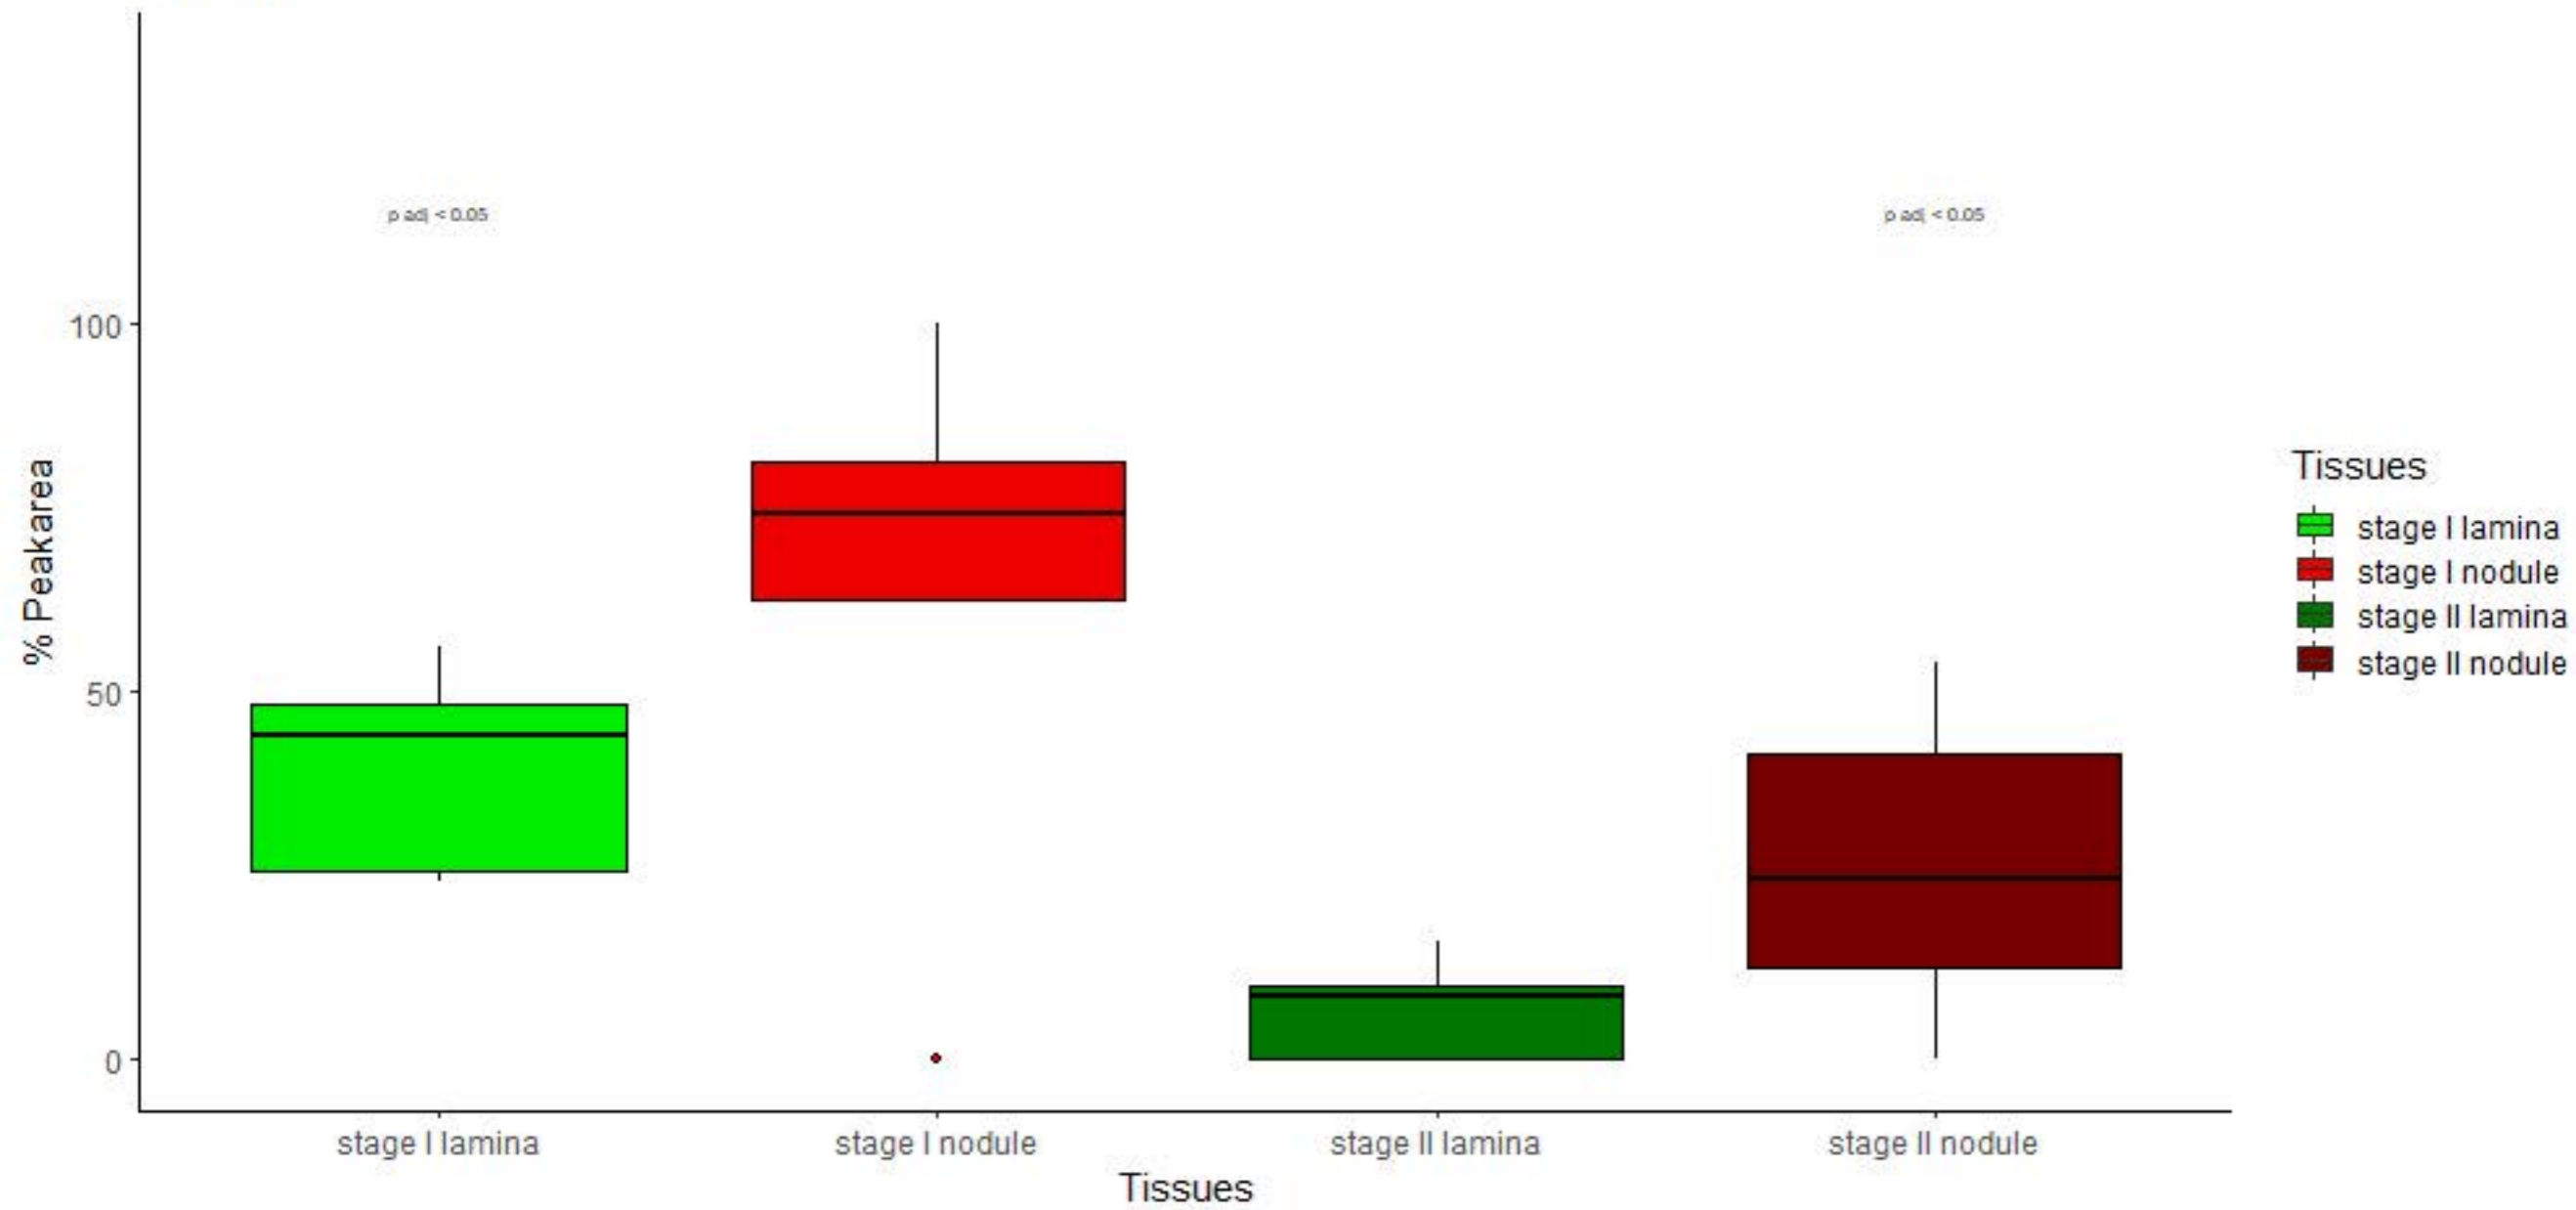

NA 42

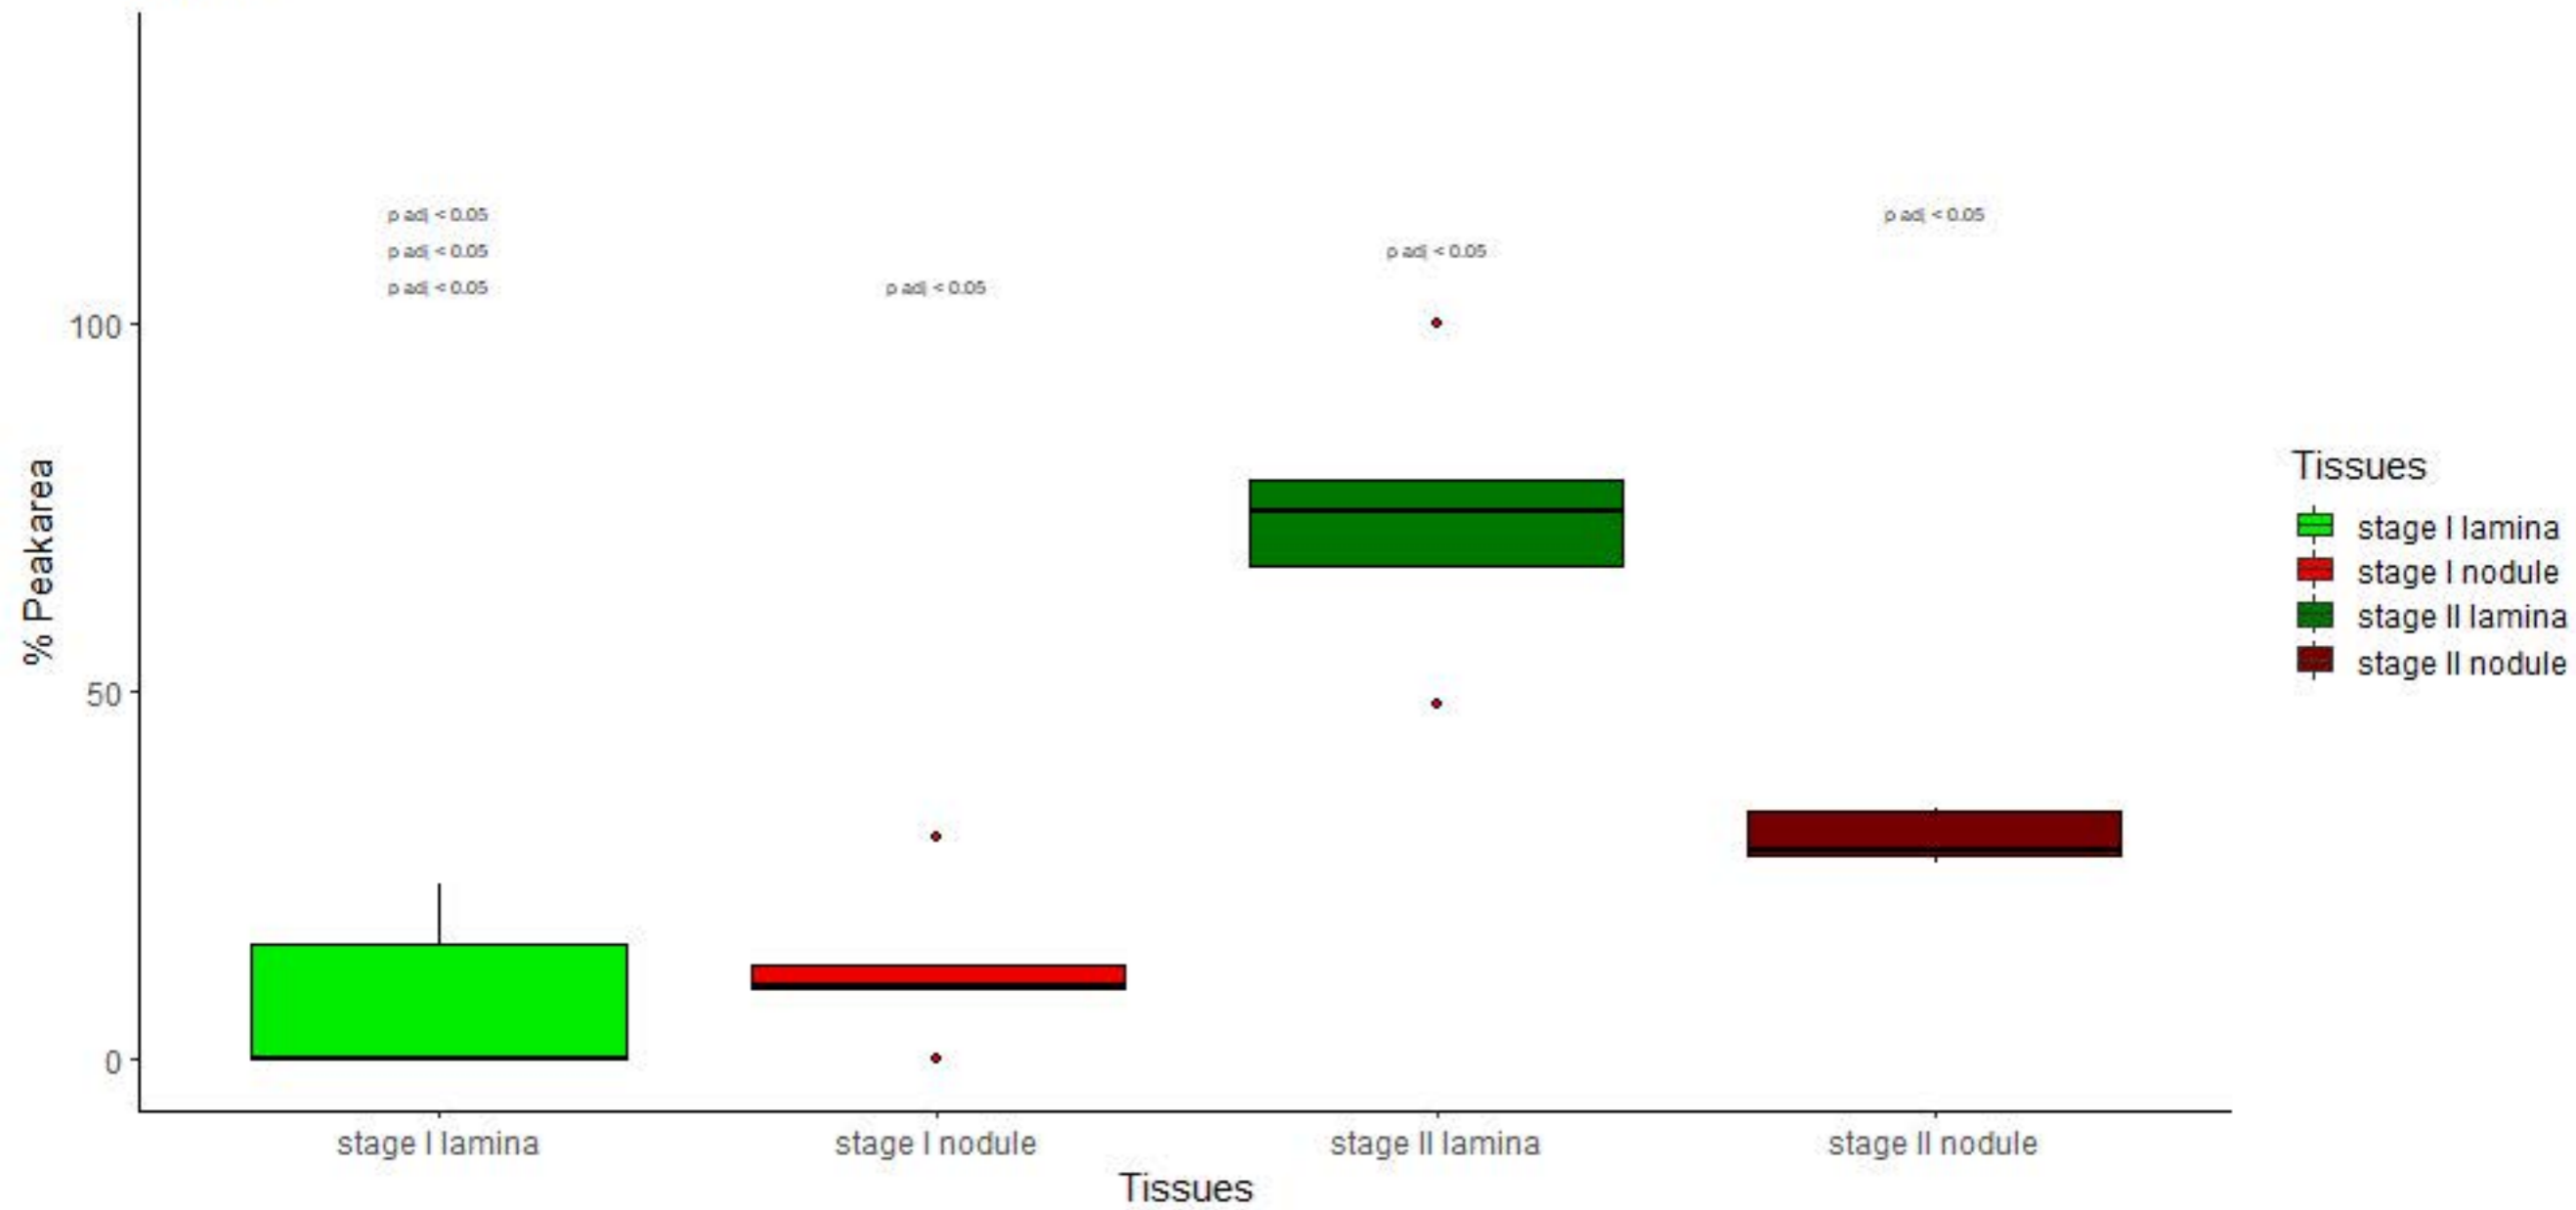



NA 104

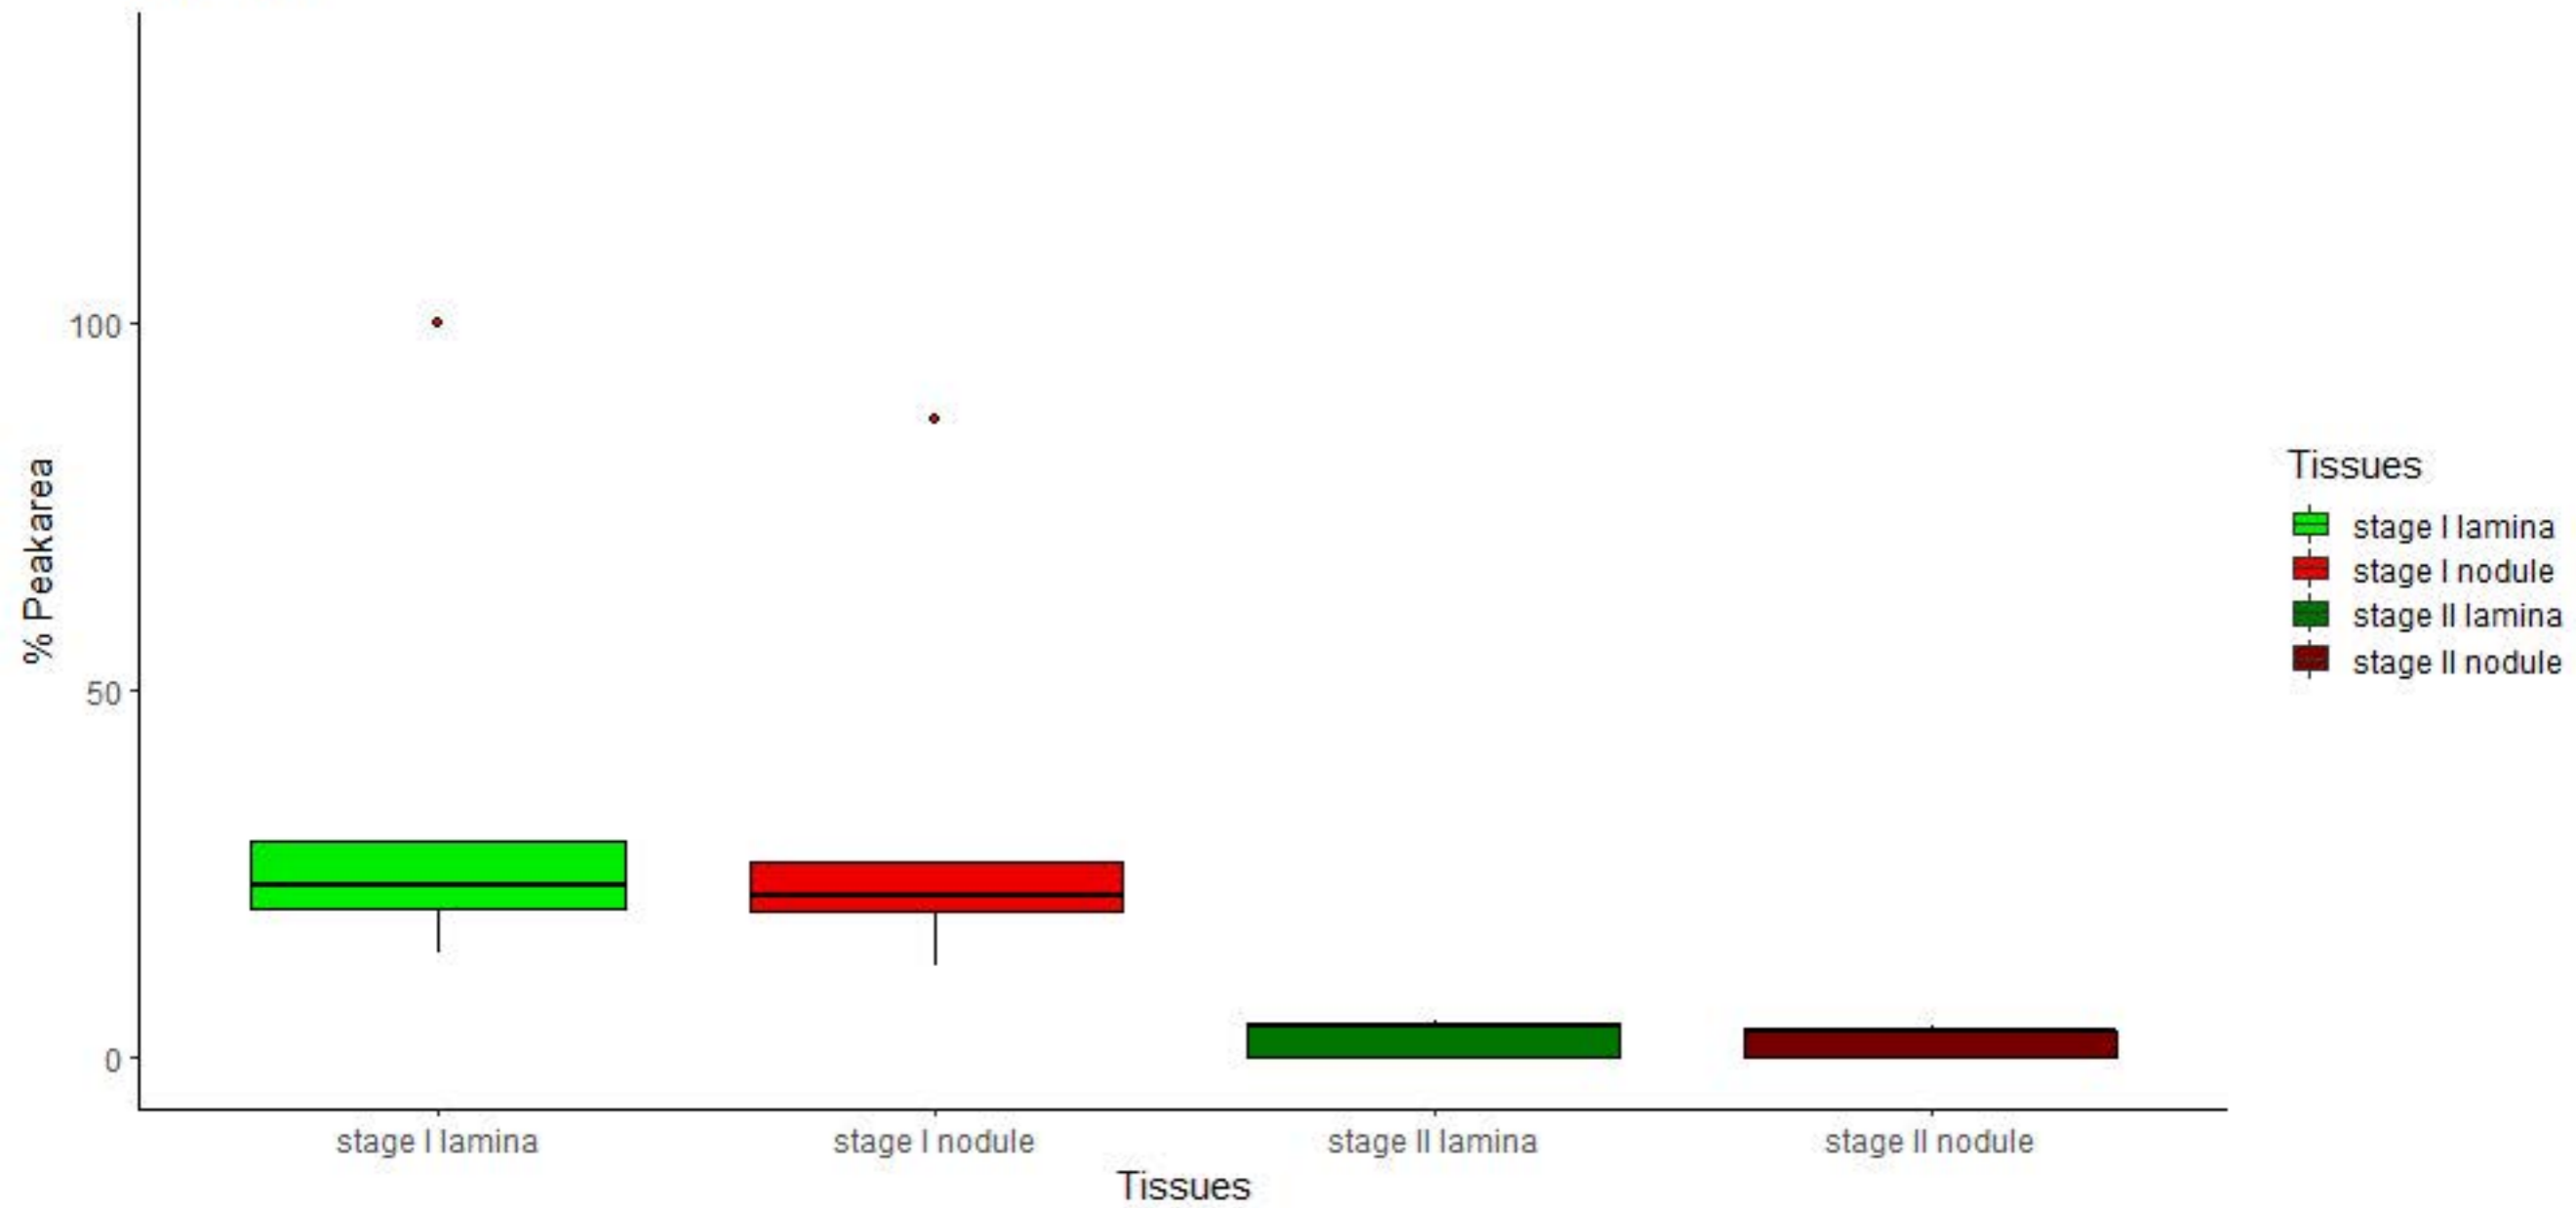

NA 112

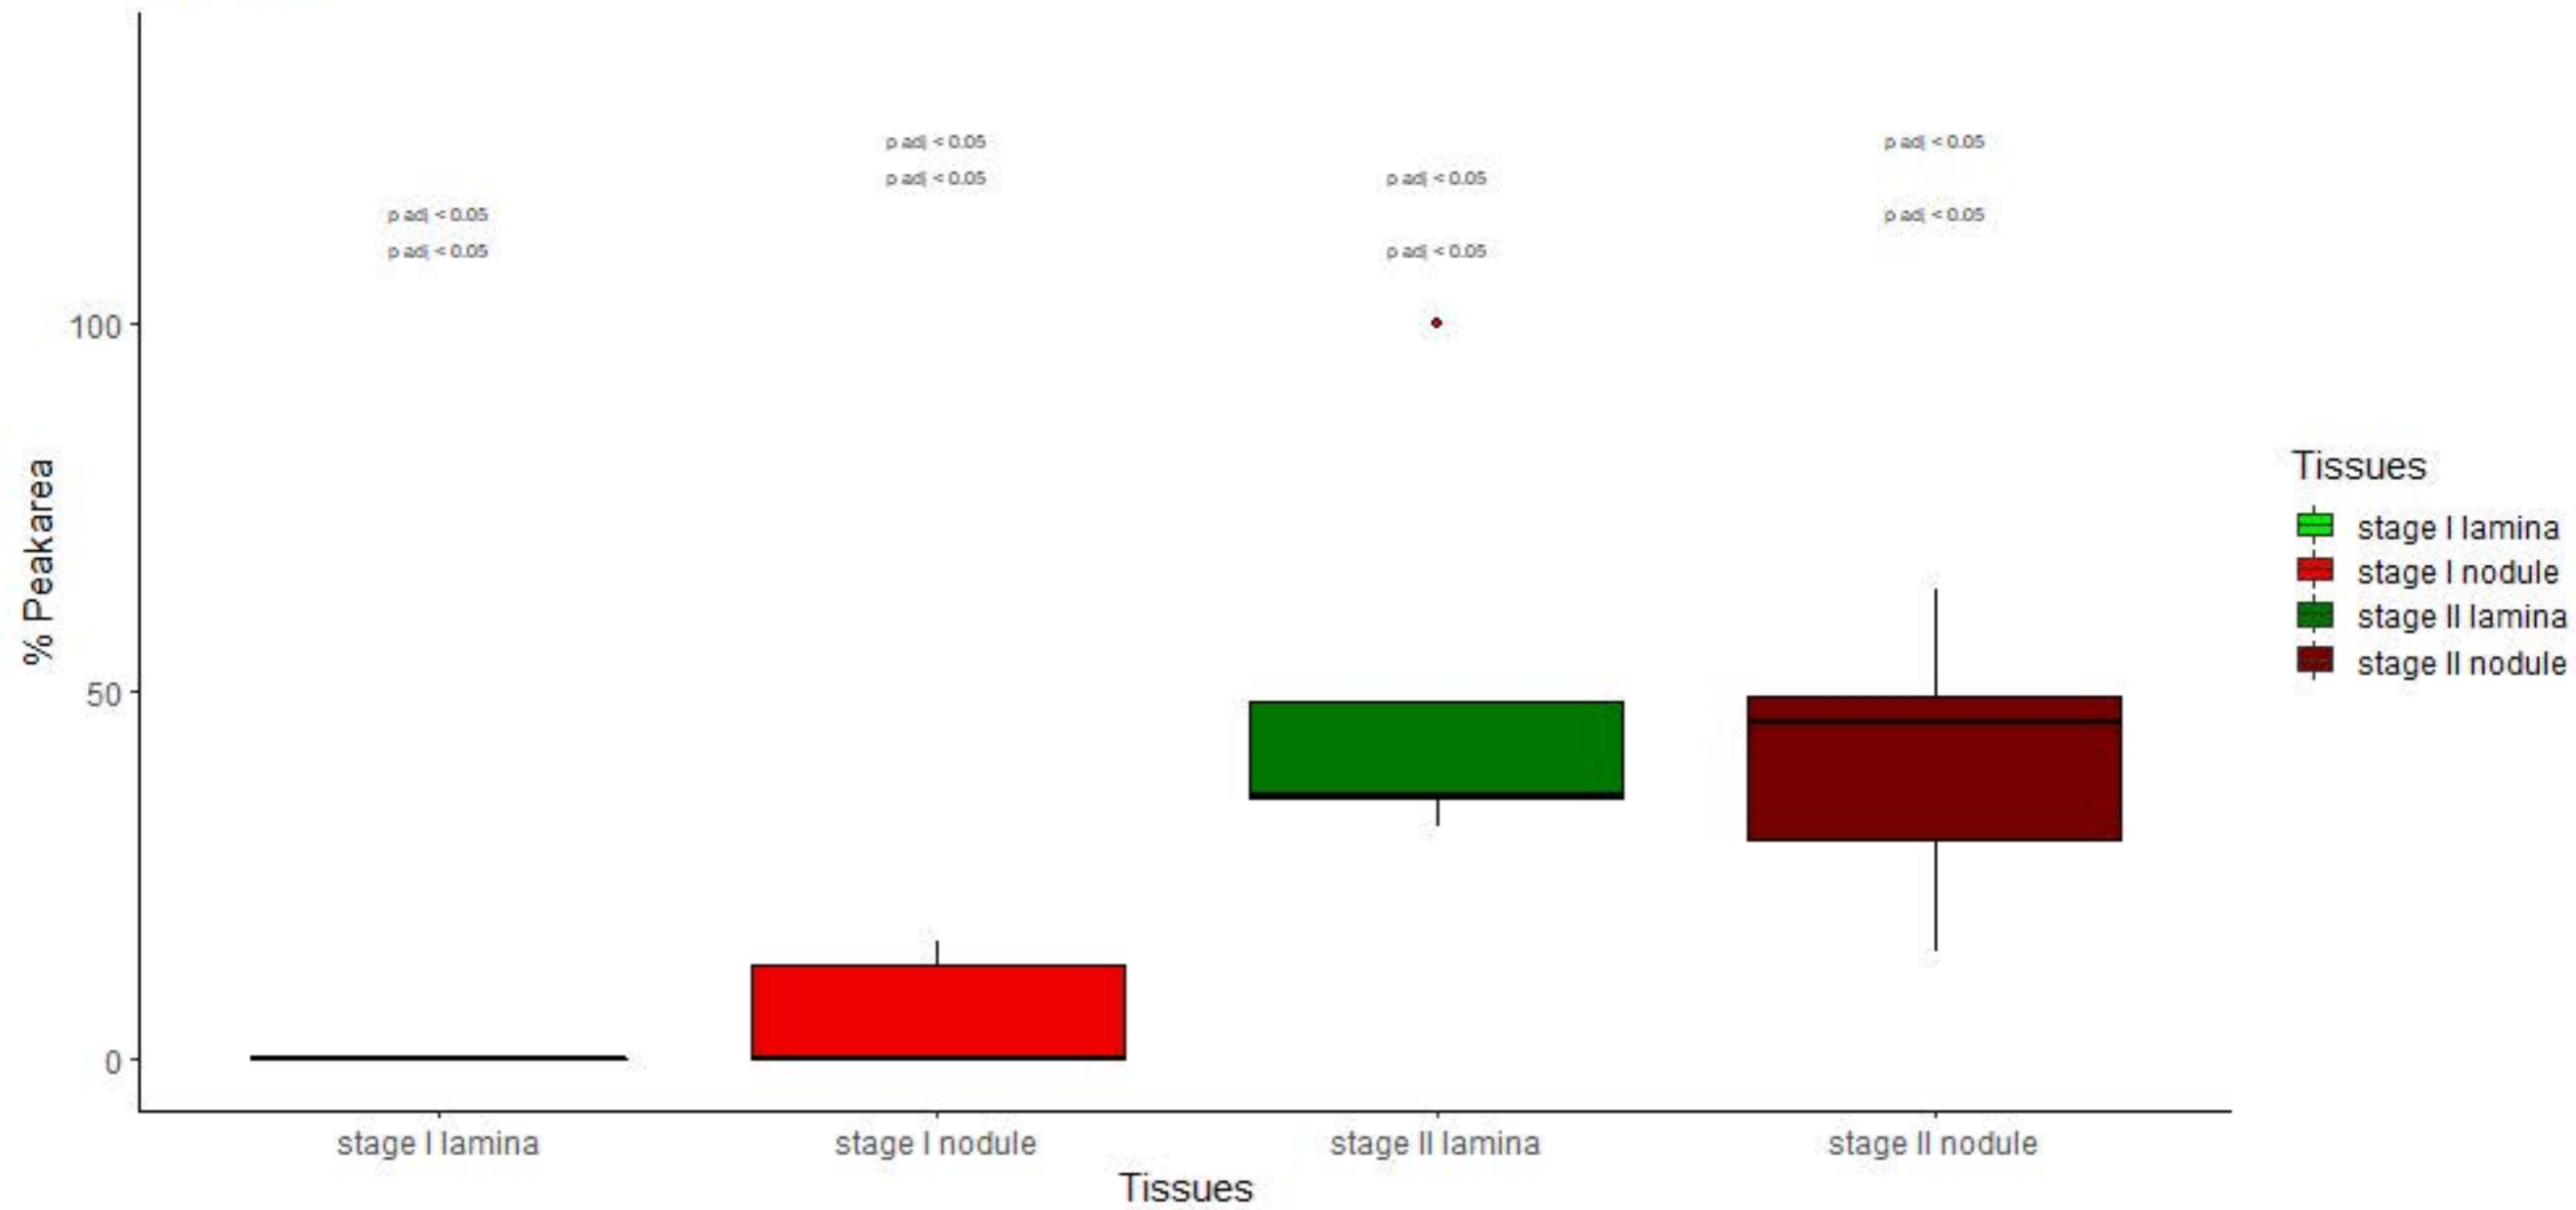

NA 118

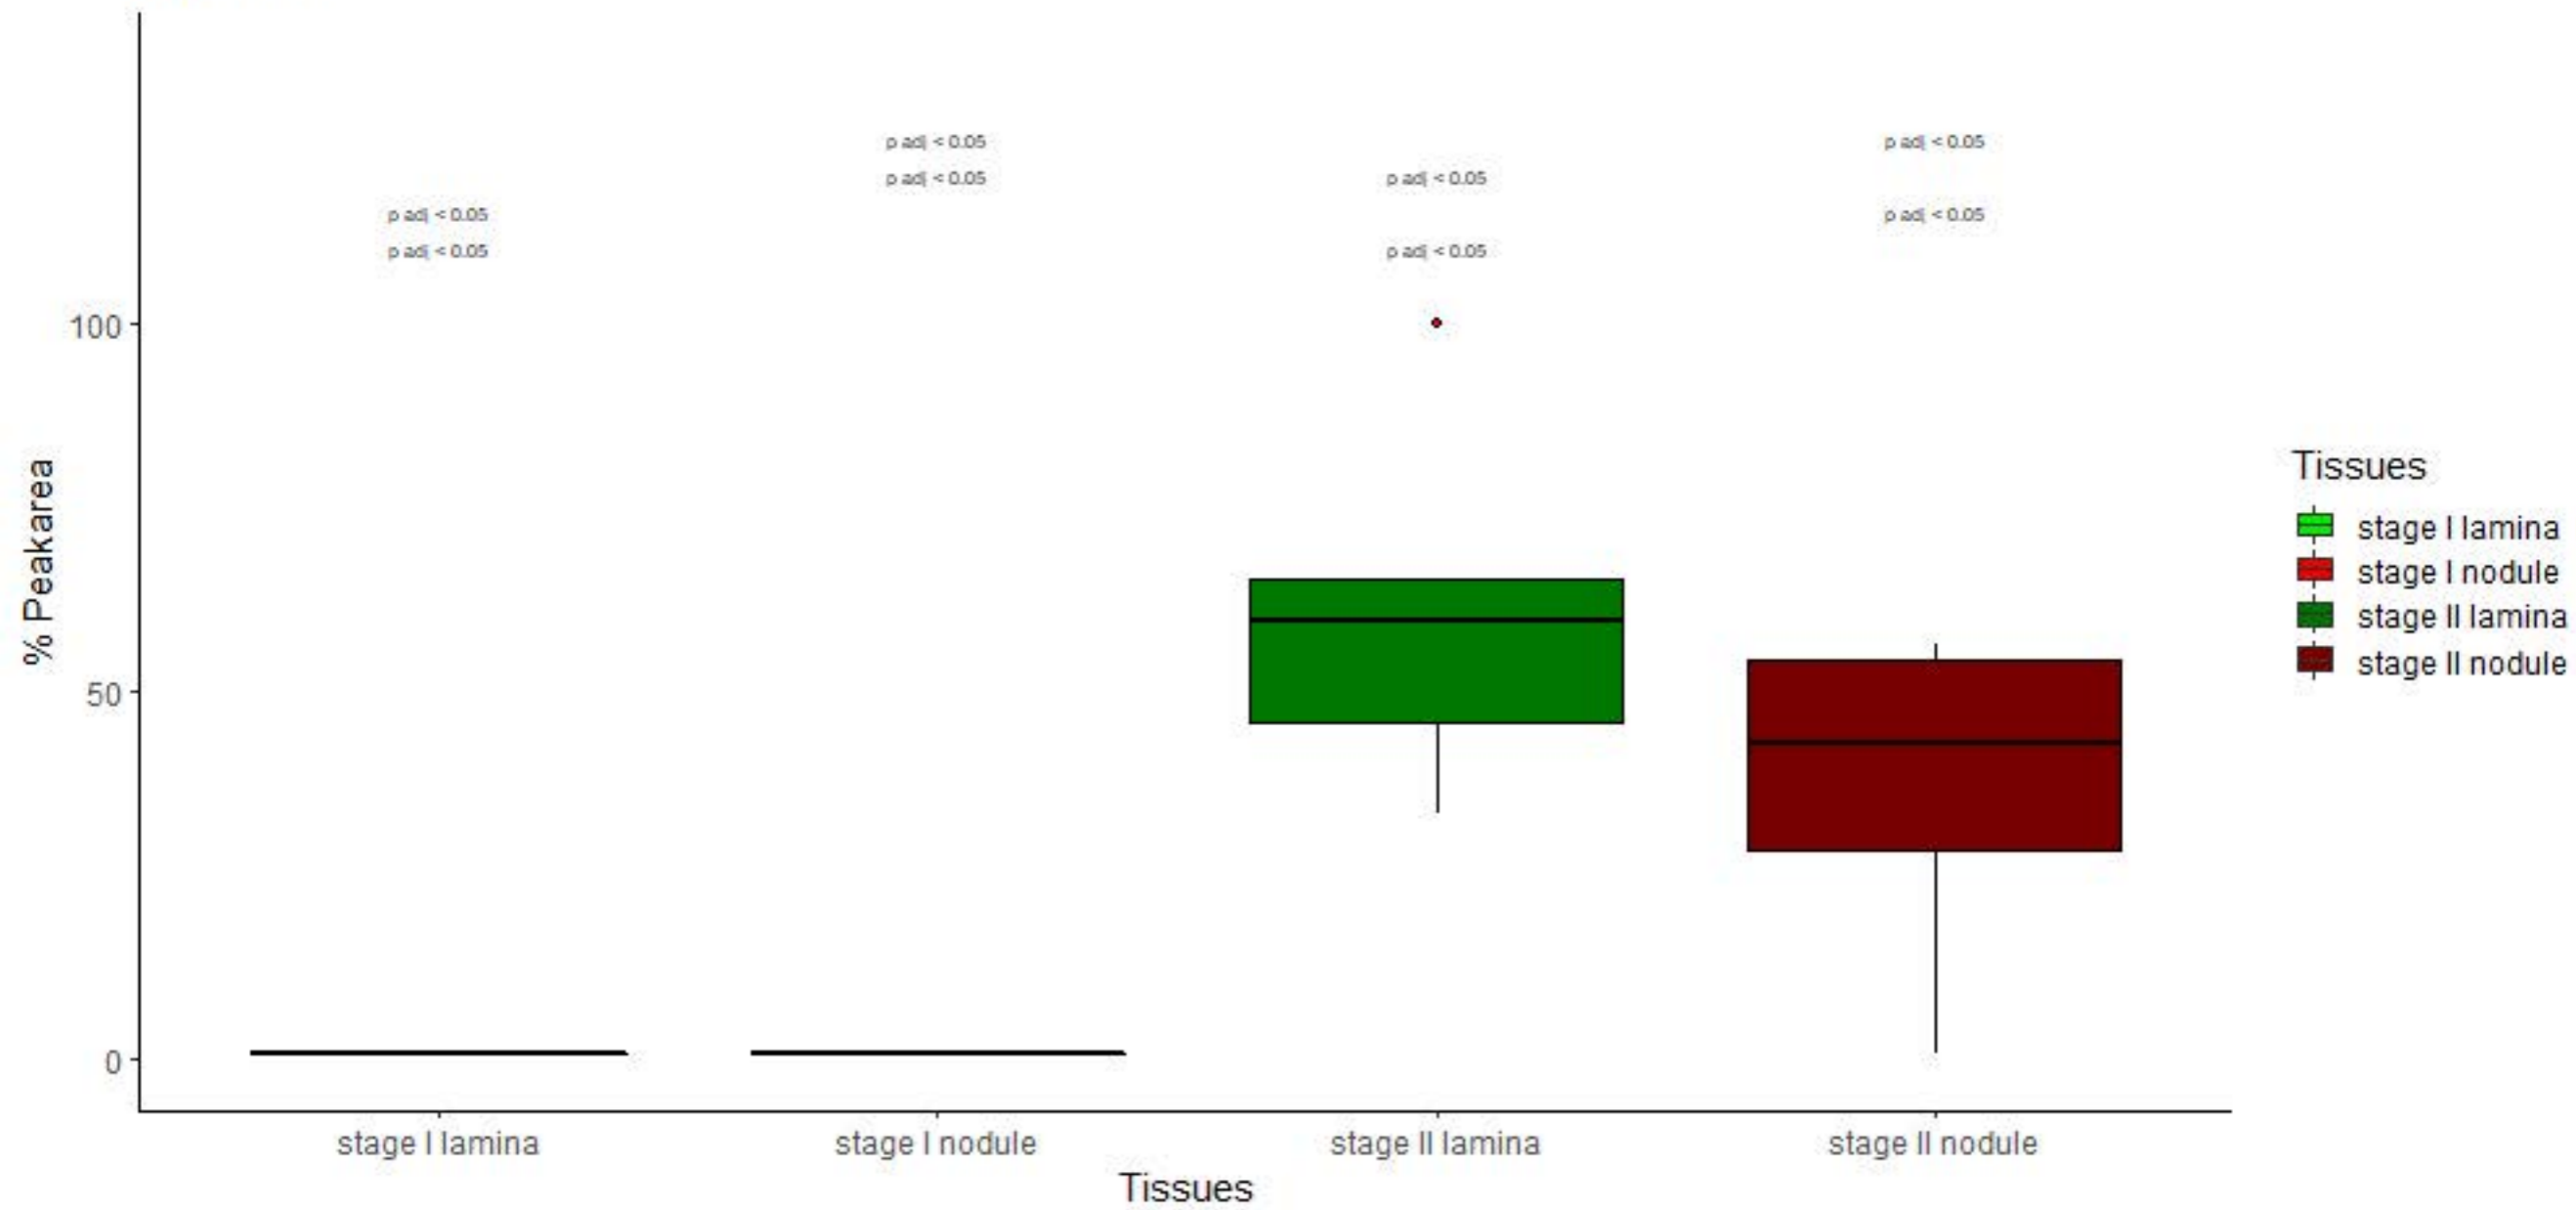

NA 125

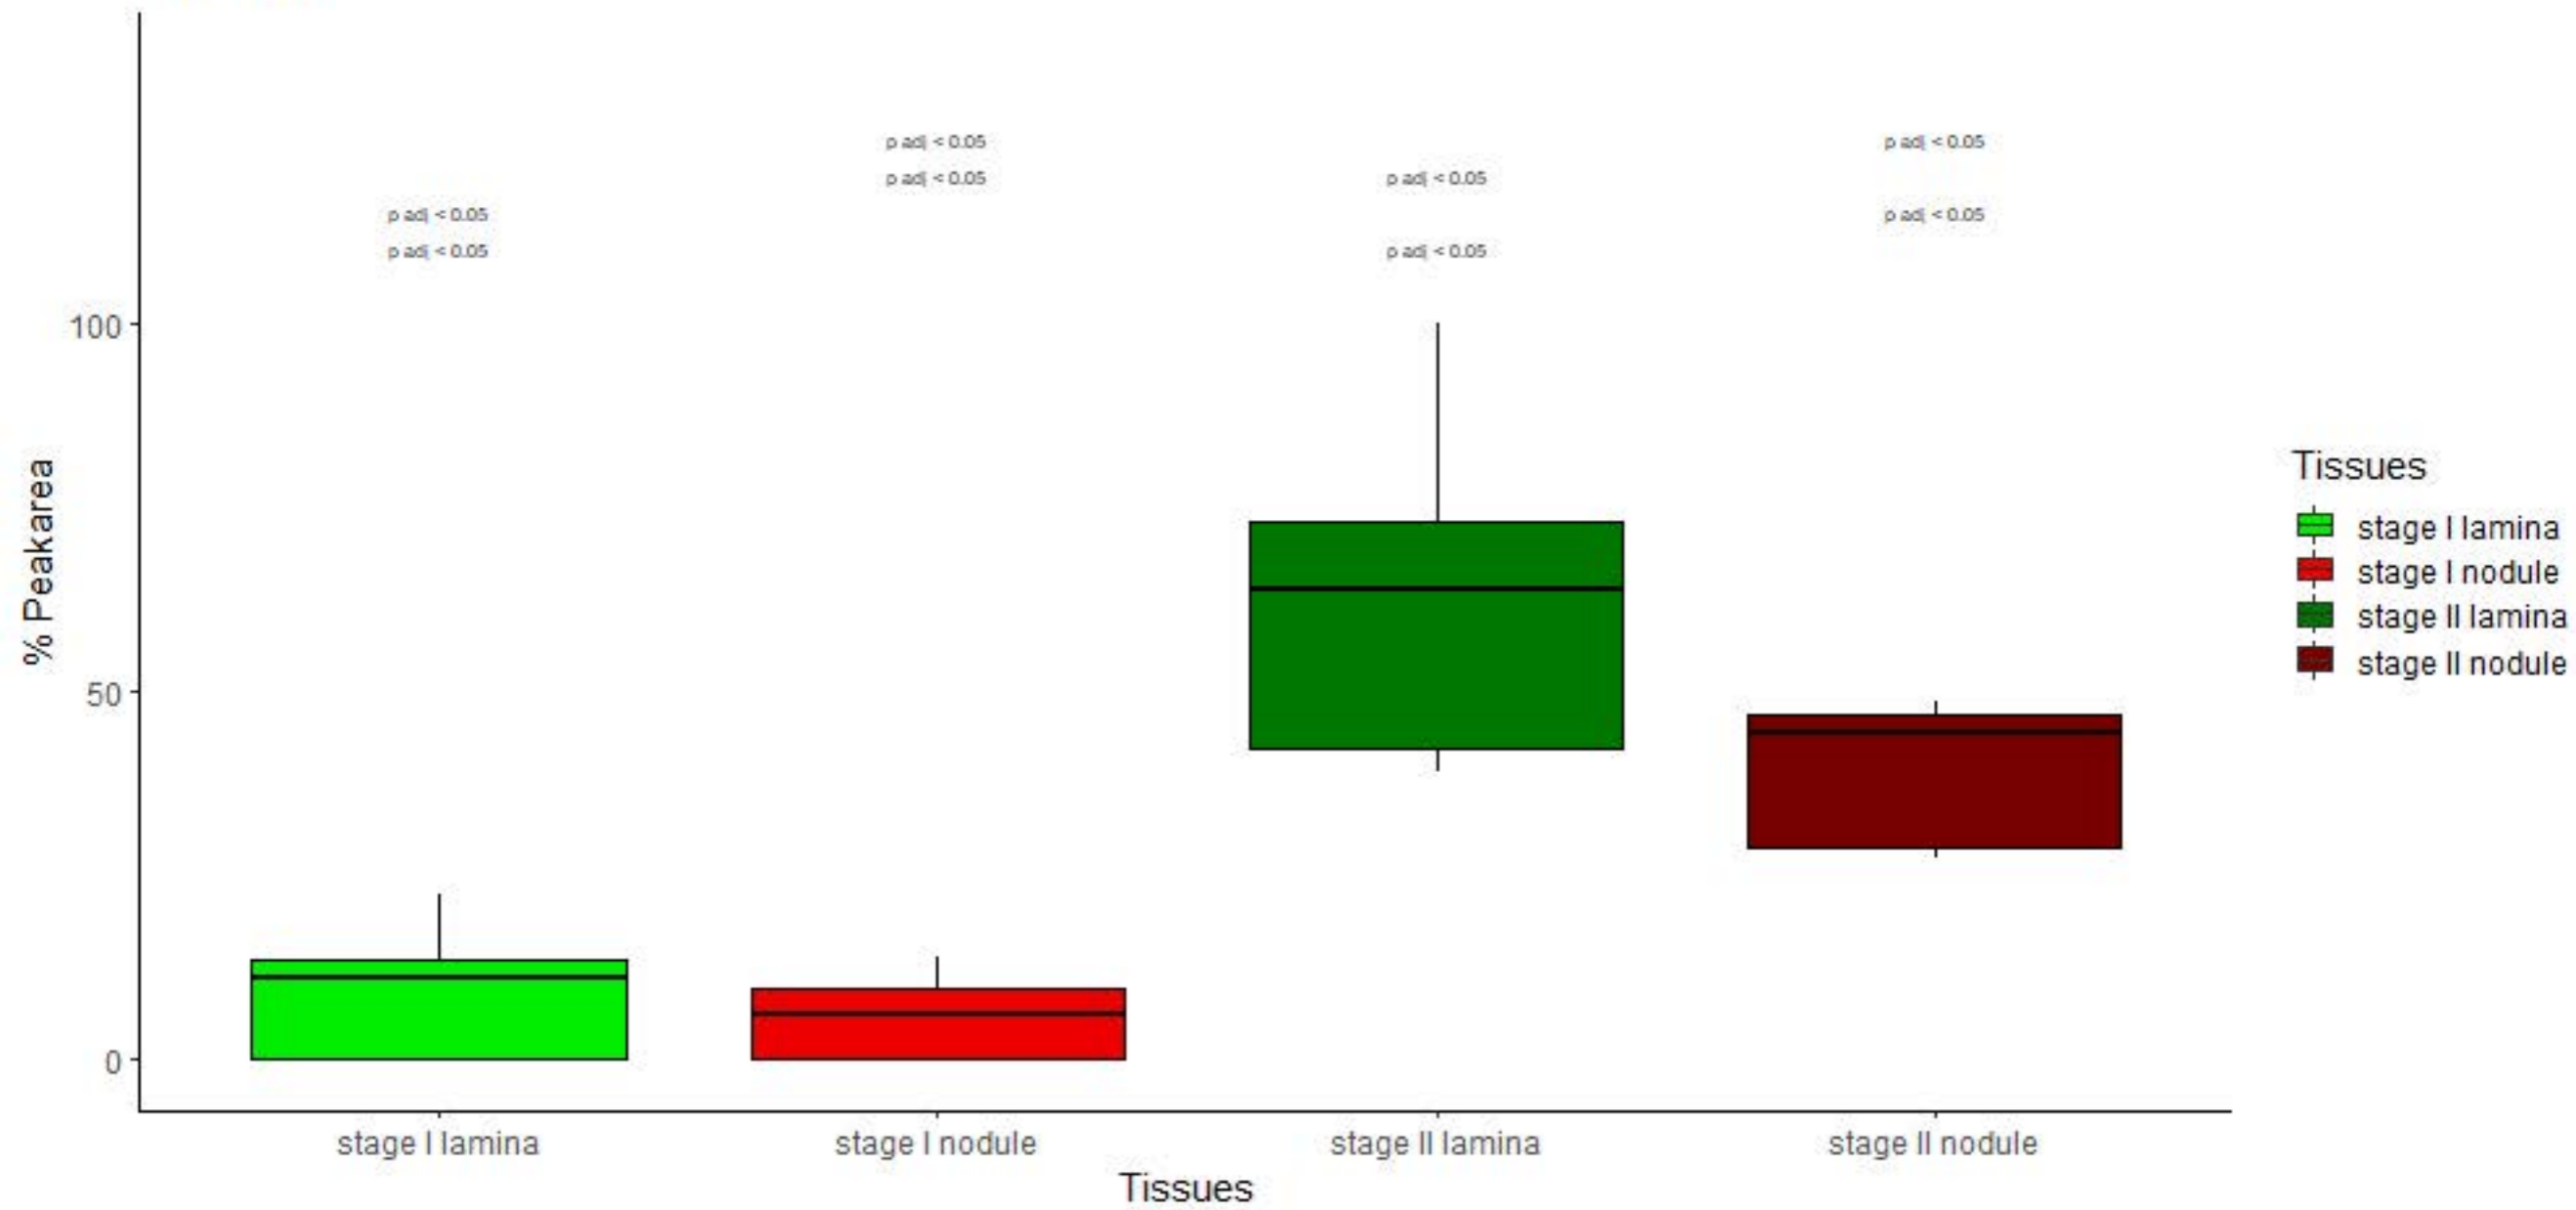

NA 129

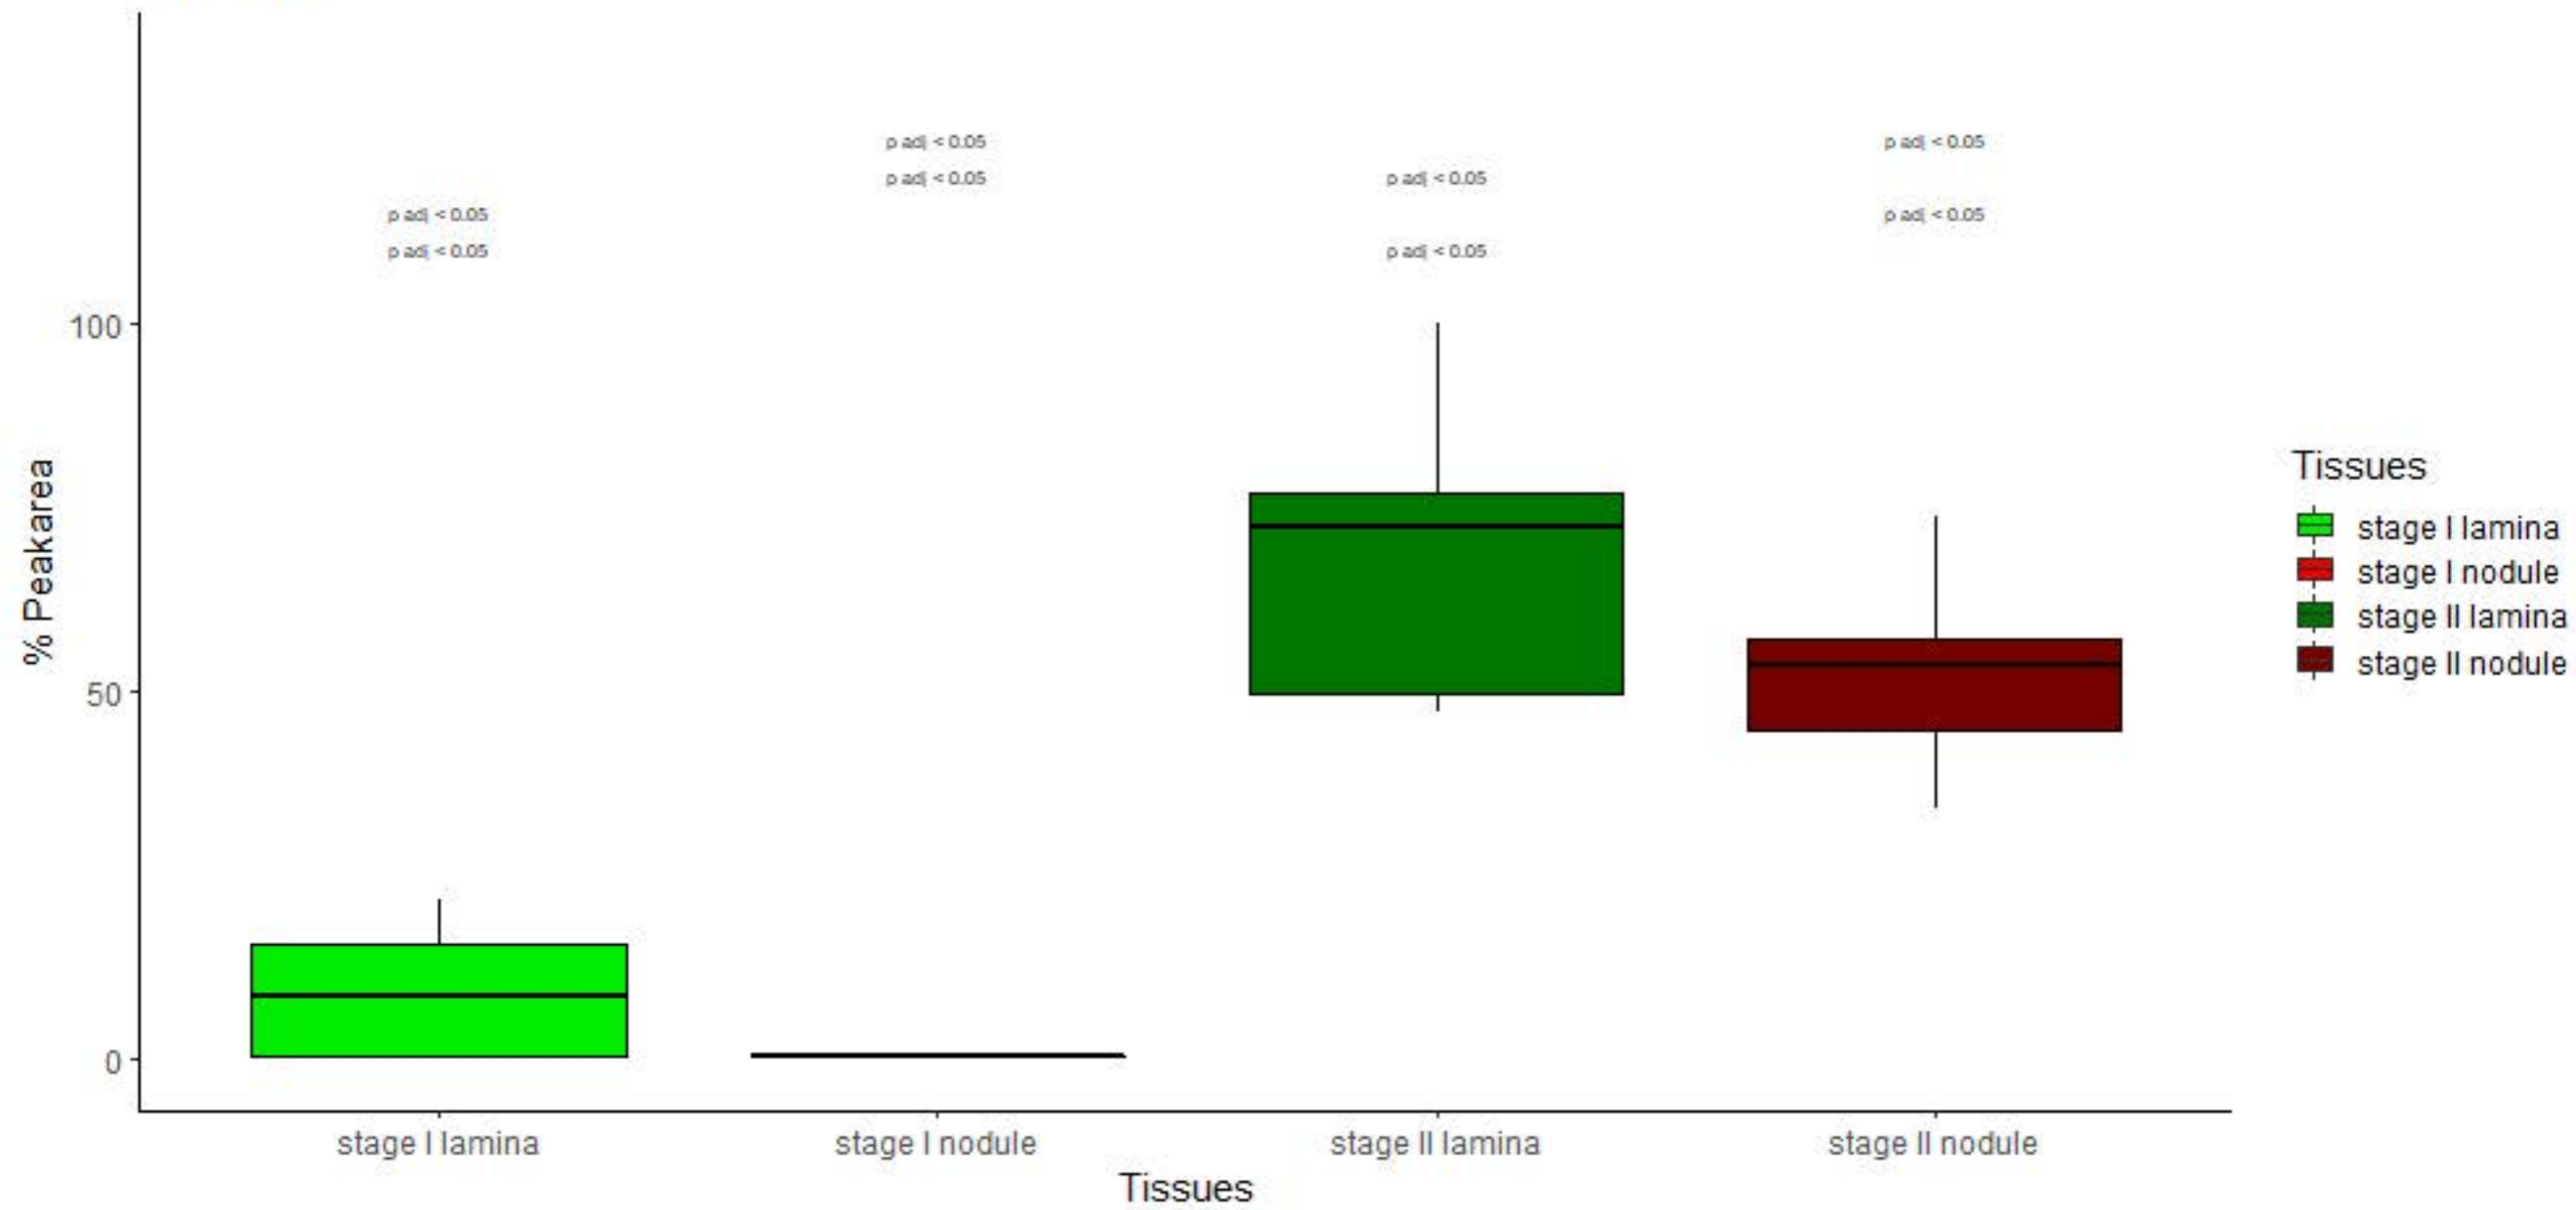

NA 130

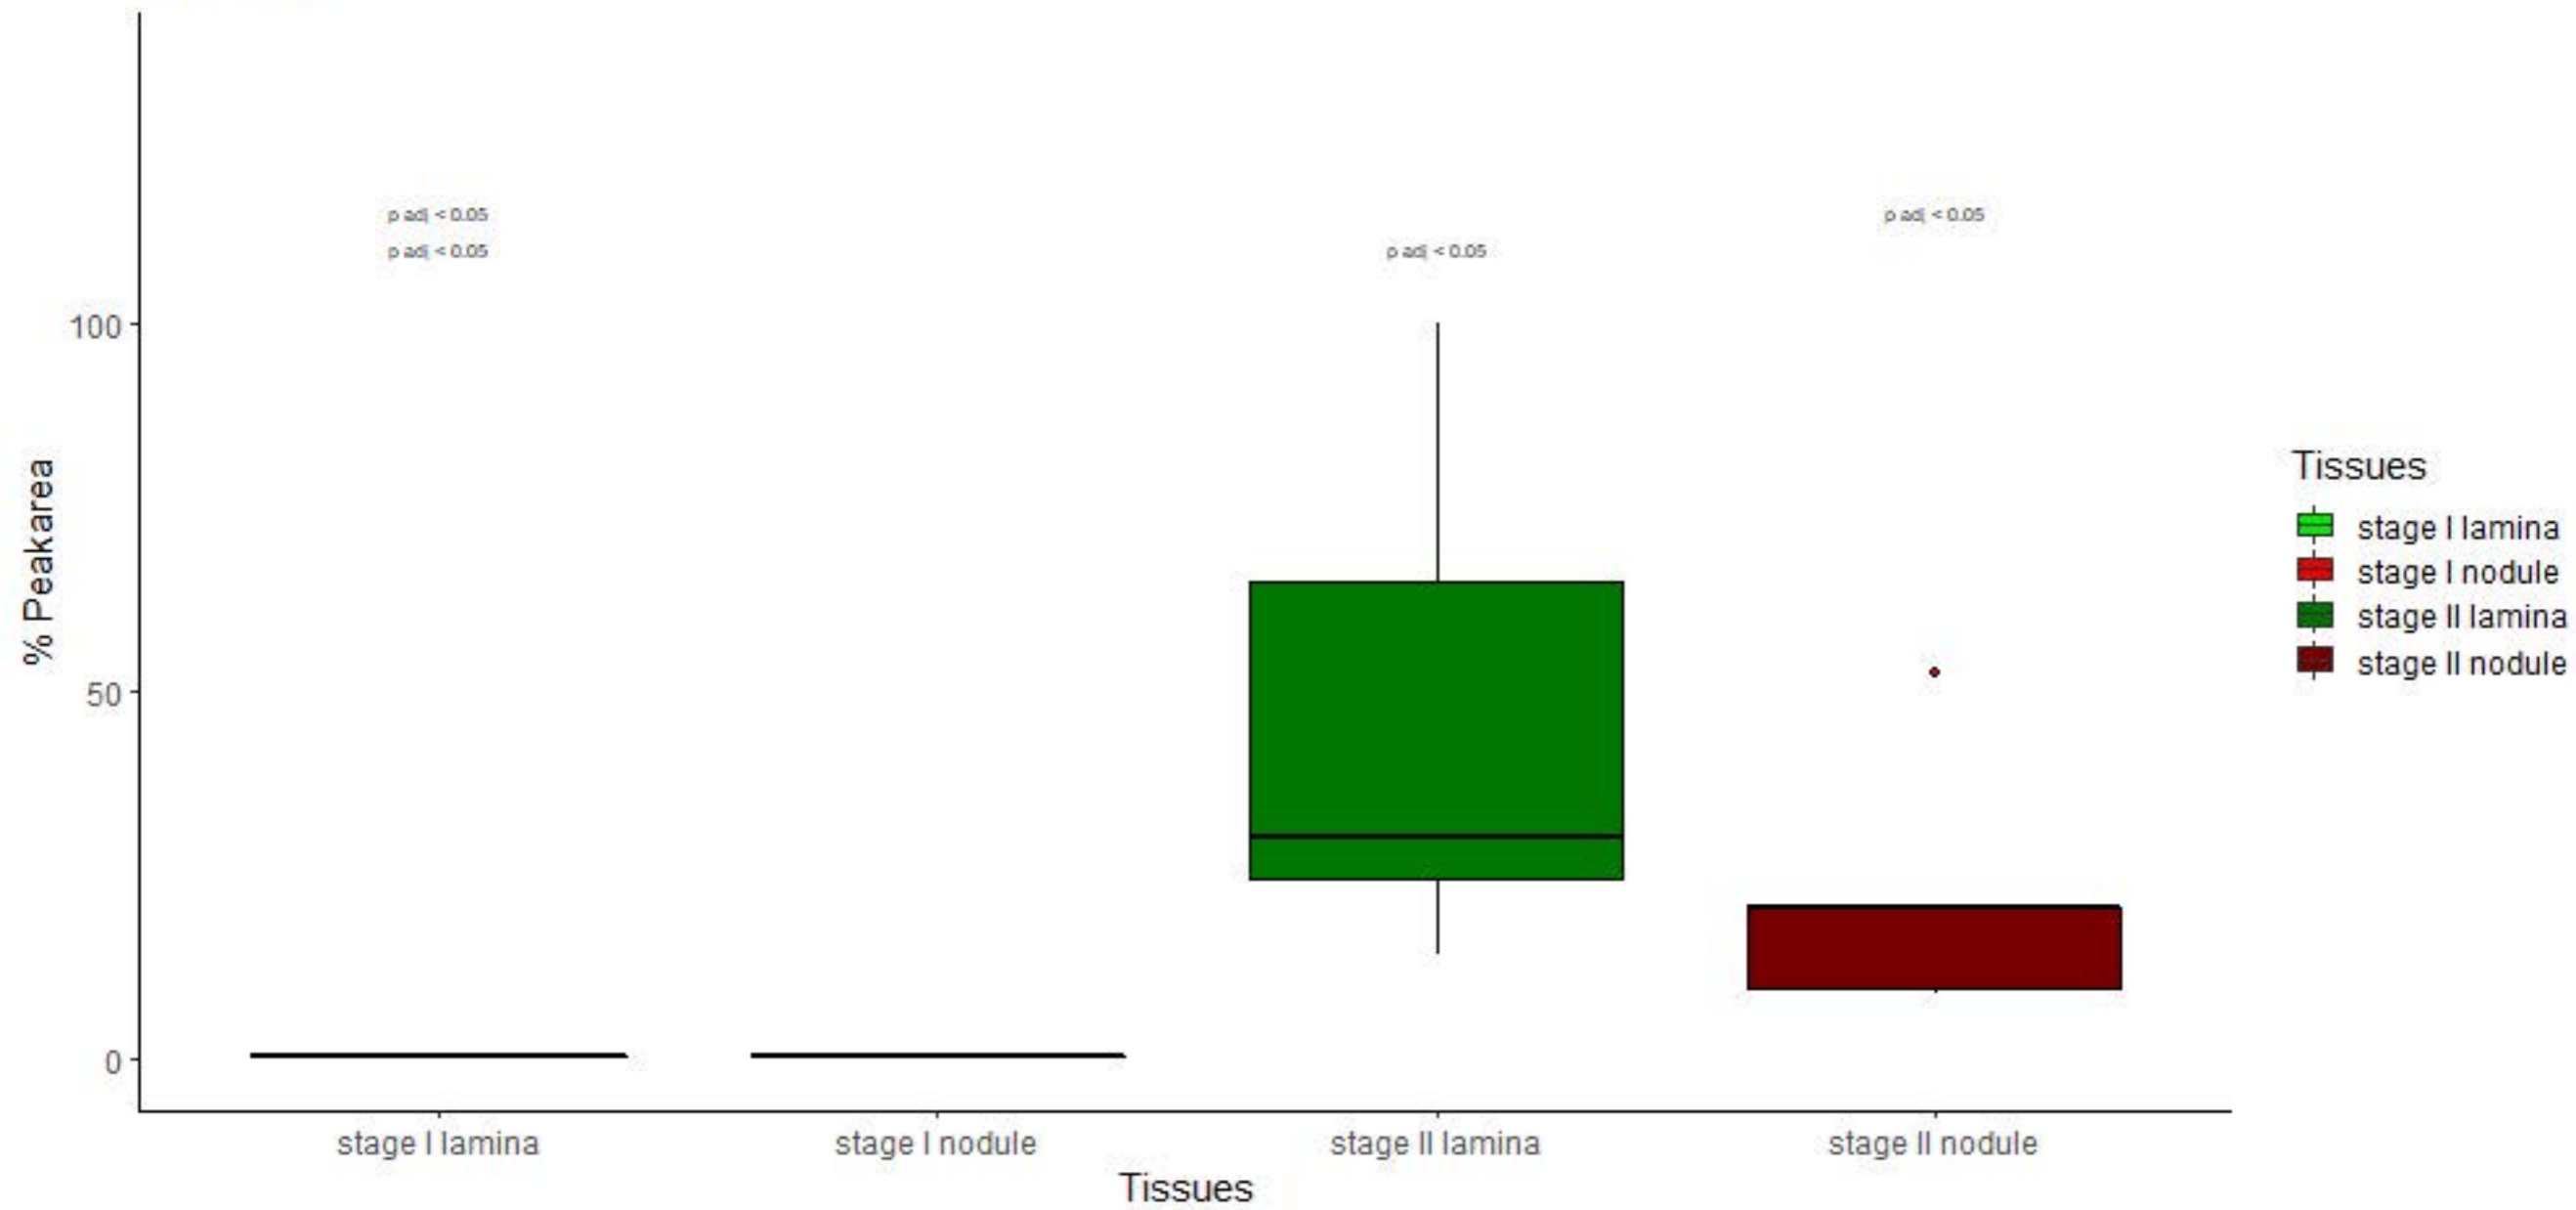

NA 132

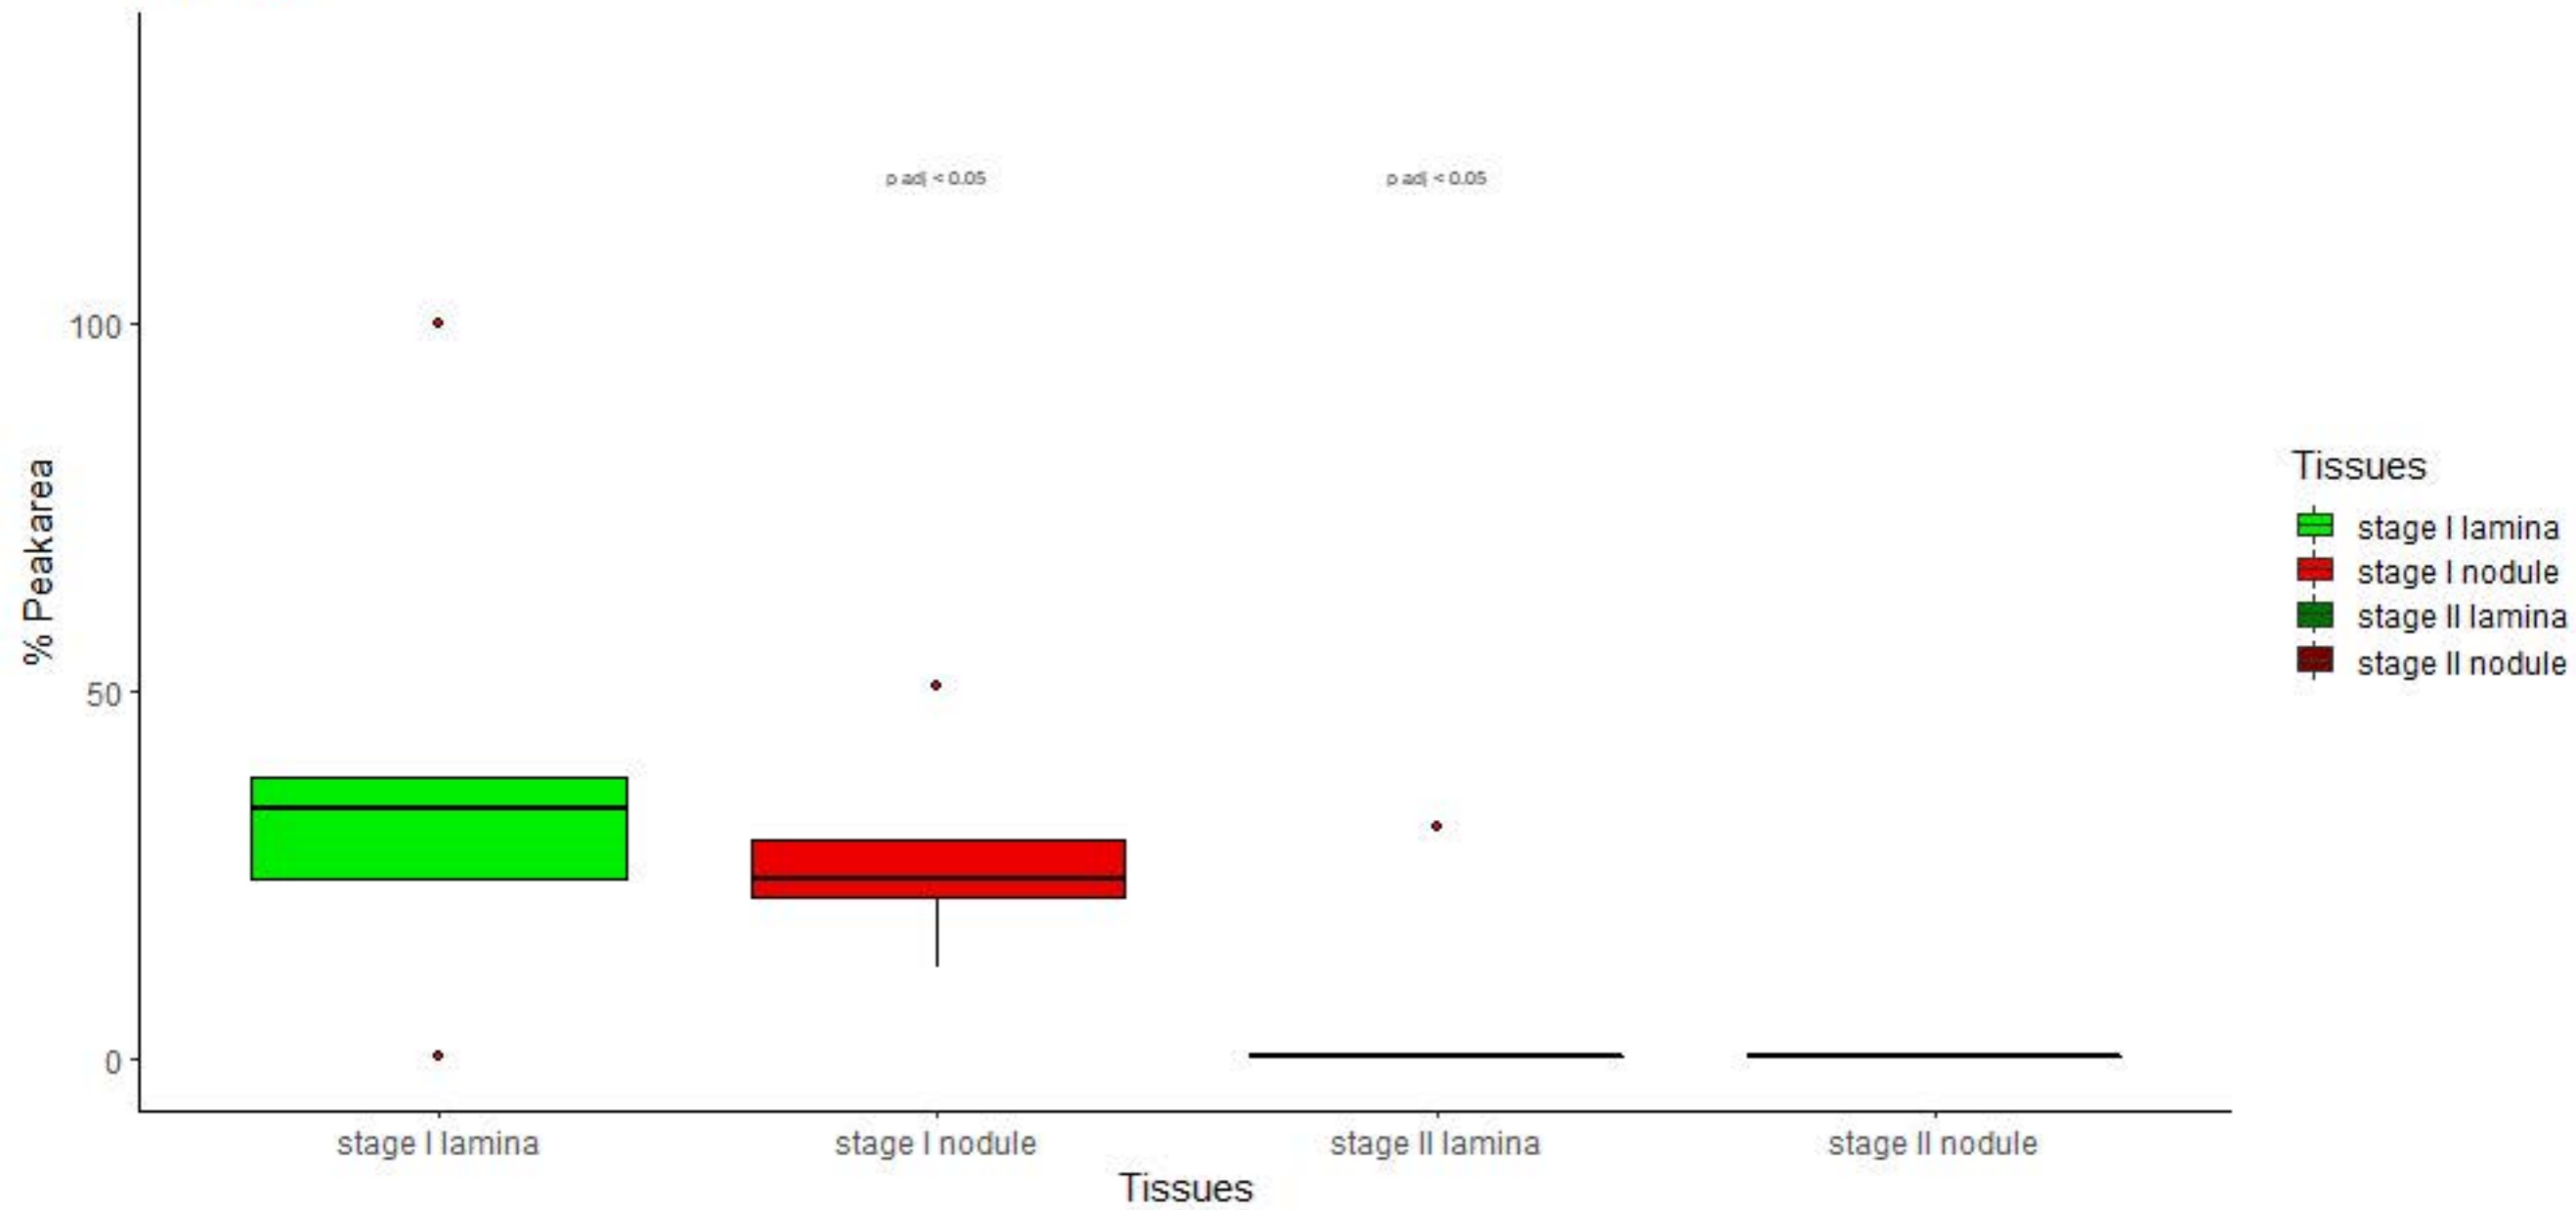

NA 146

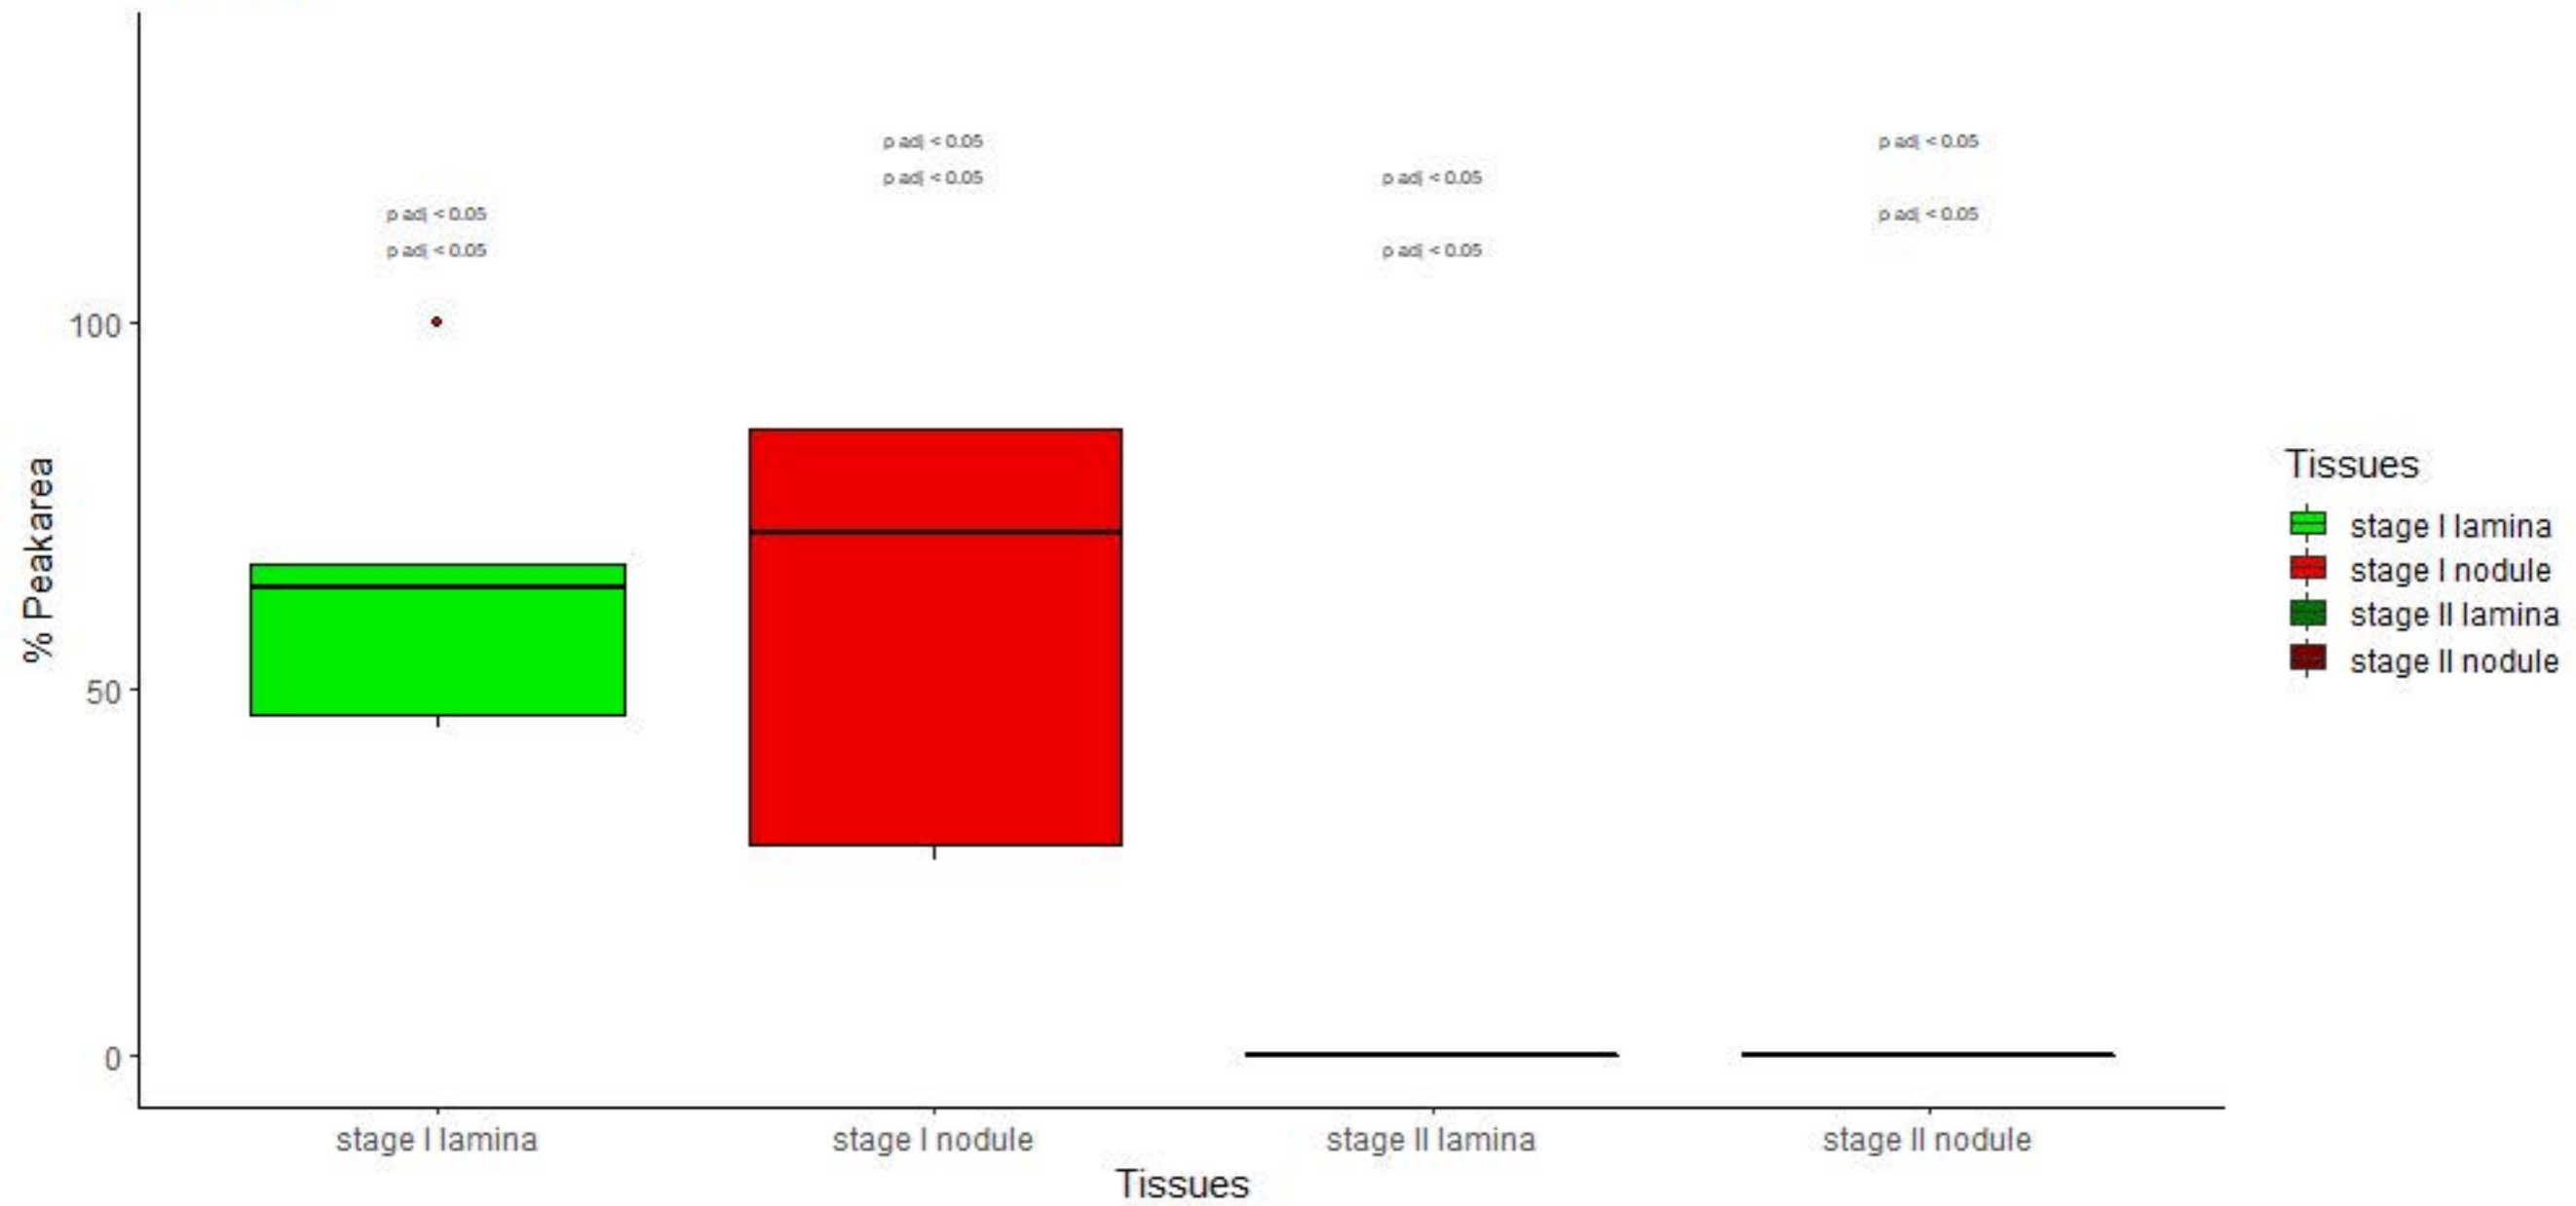



NA 150

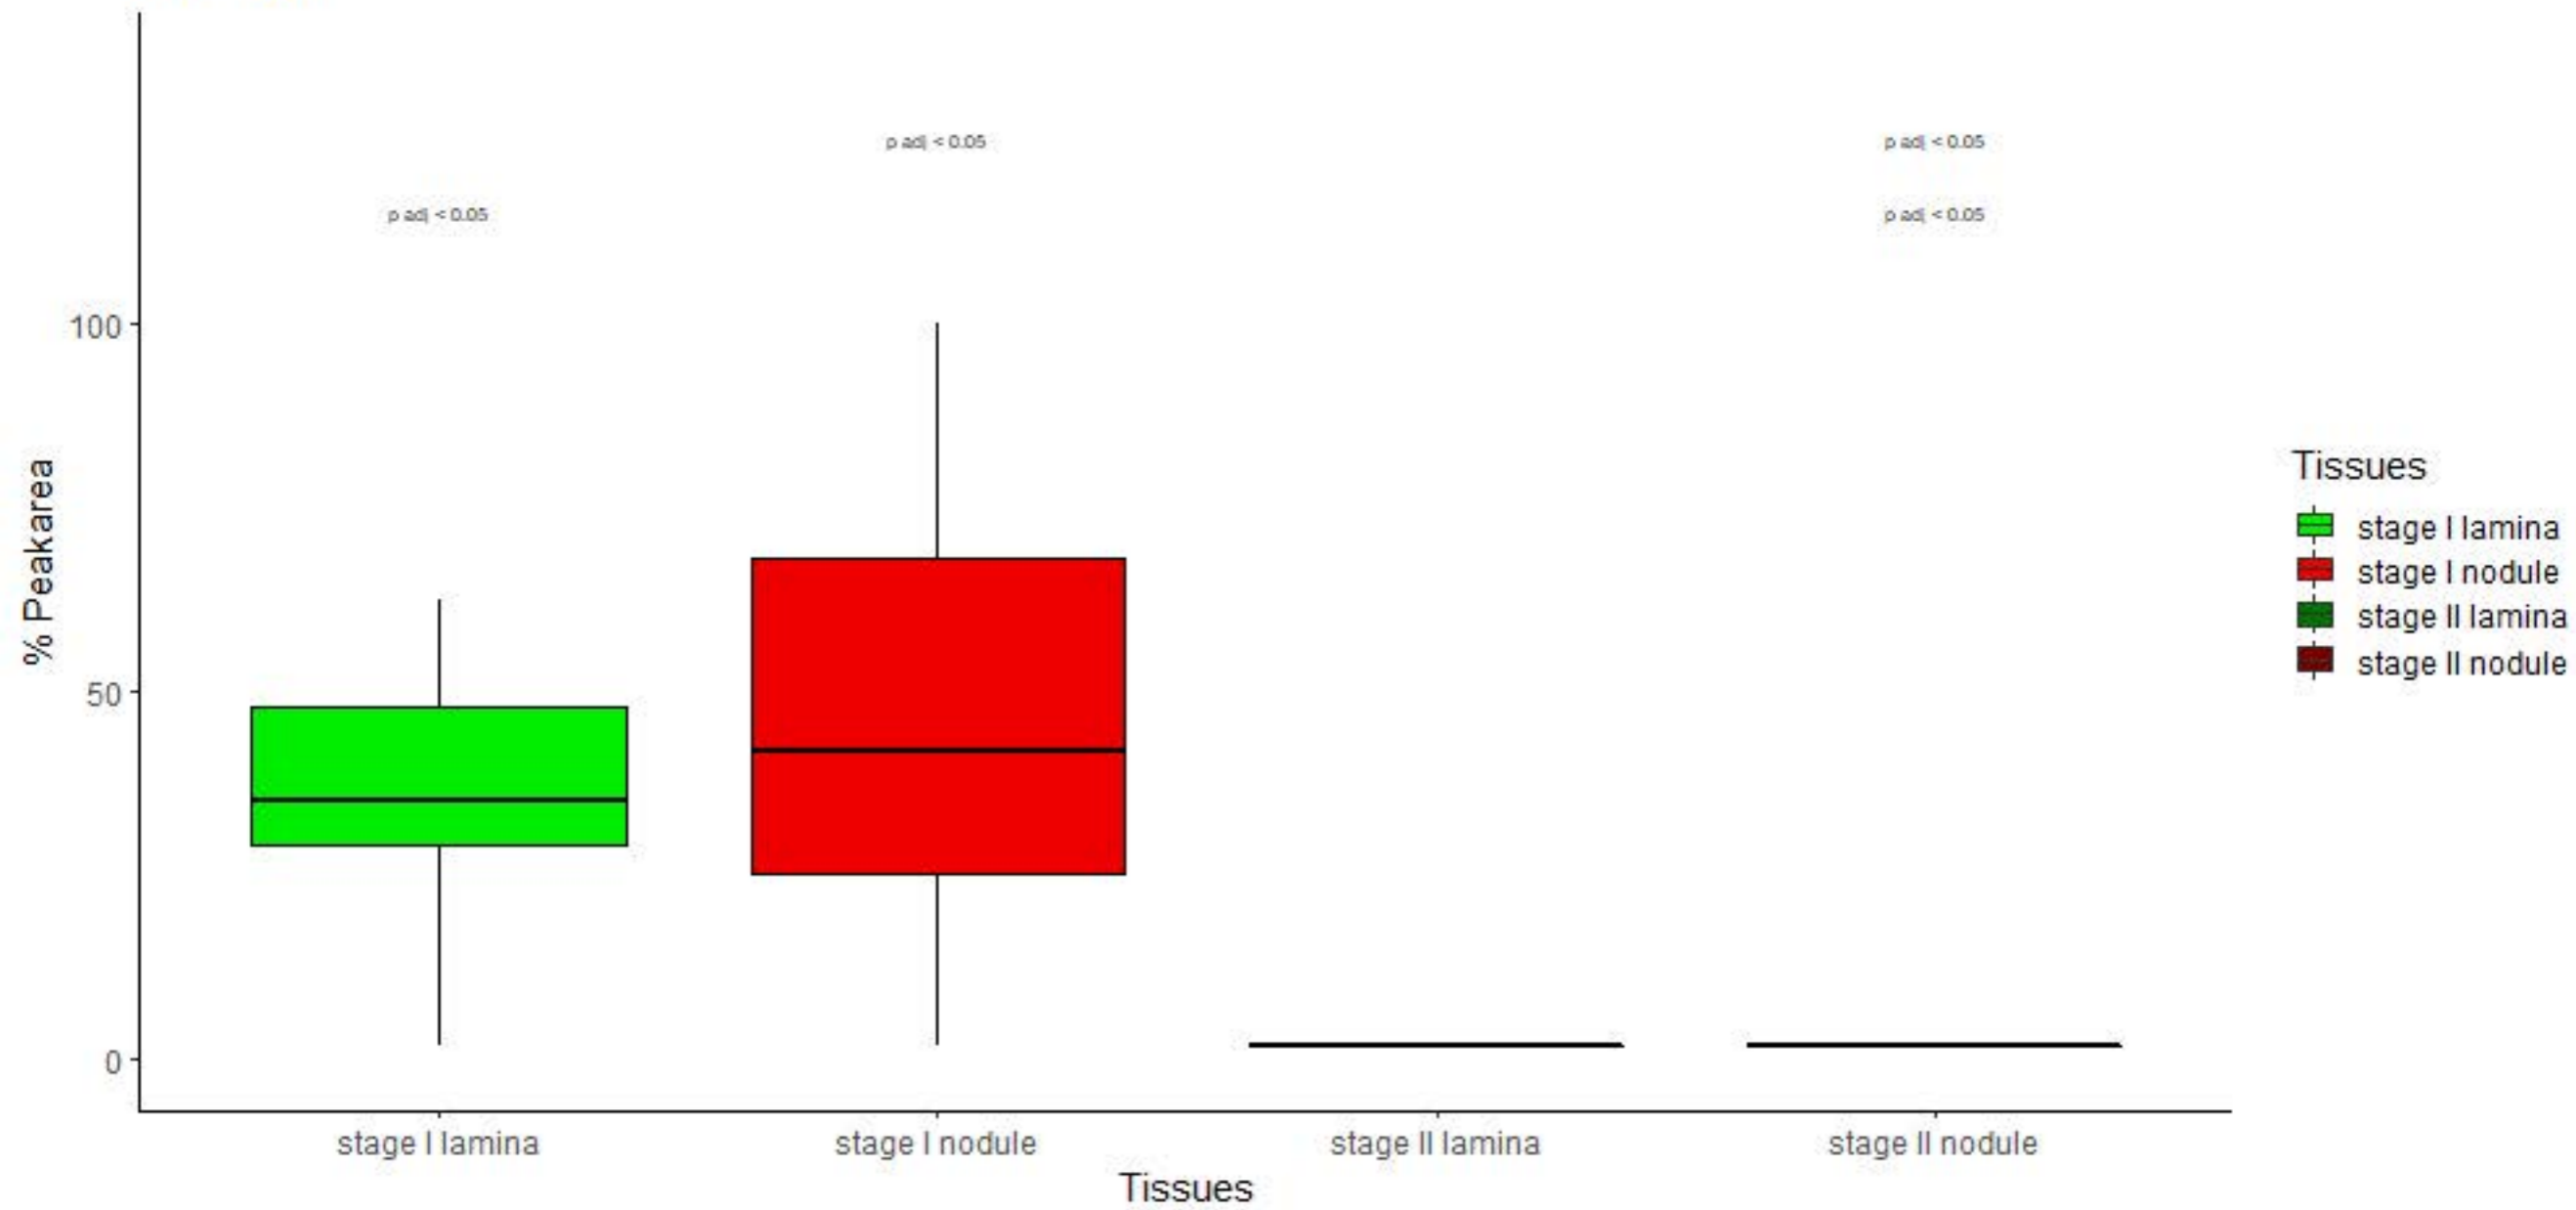

NA 168

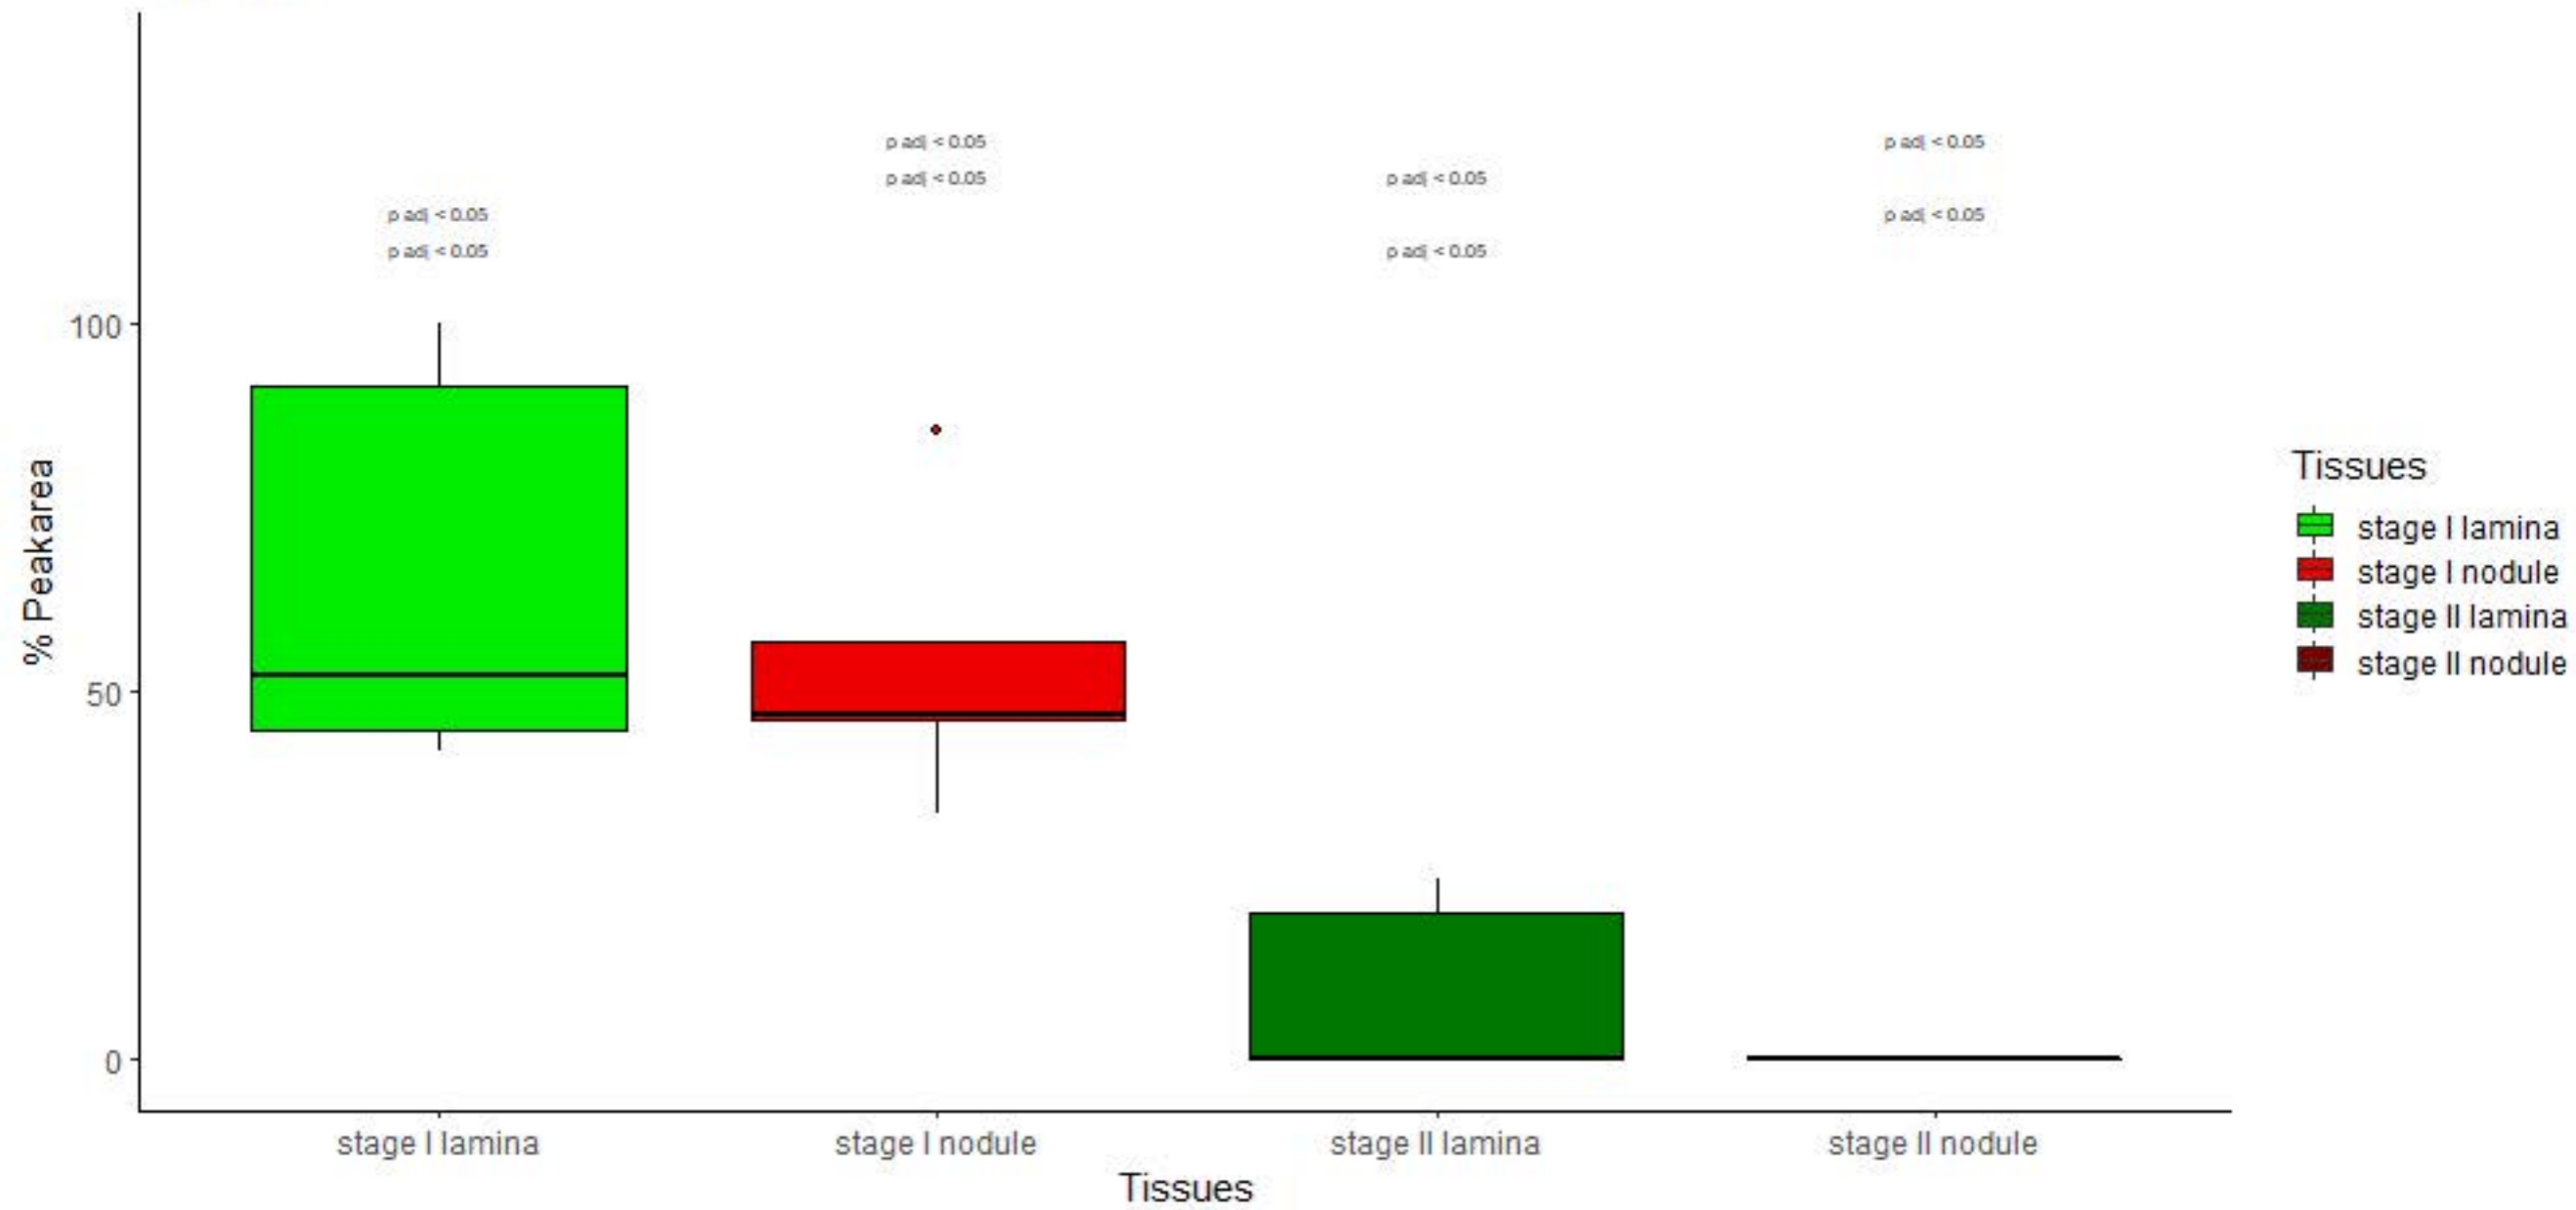

NA 171

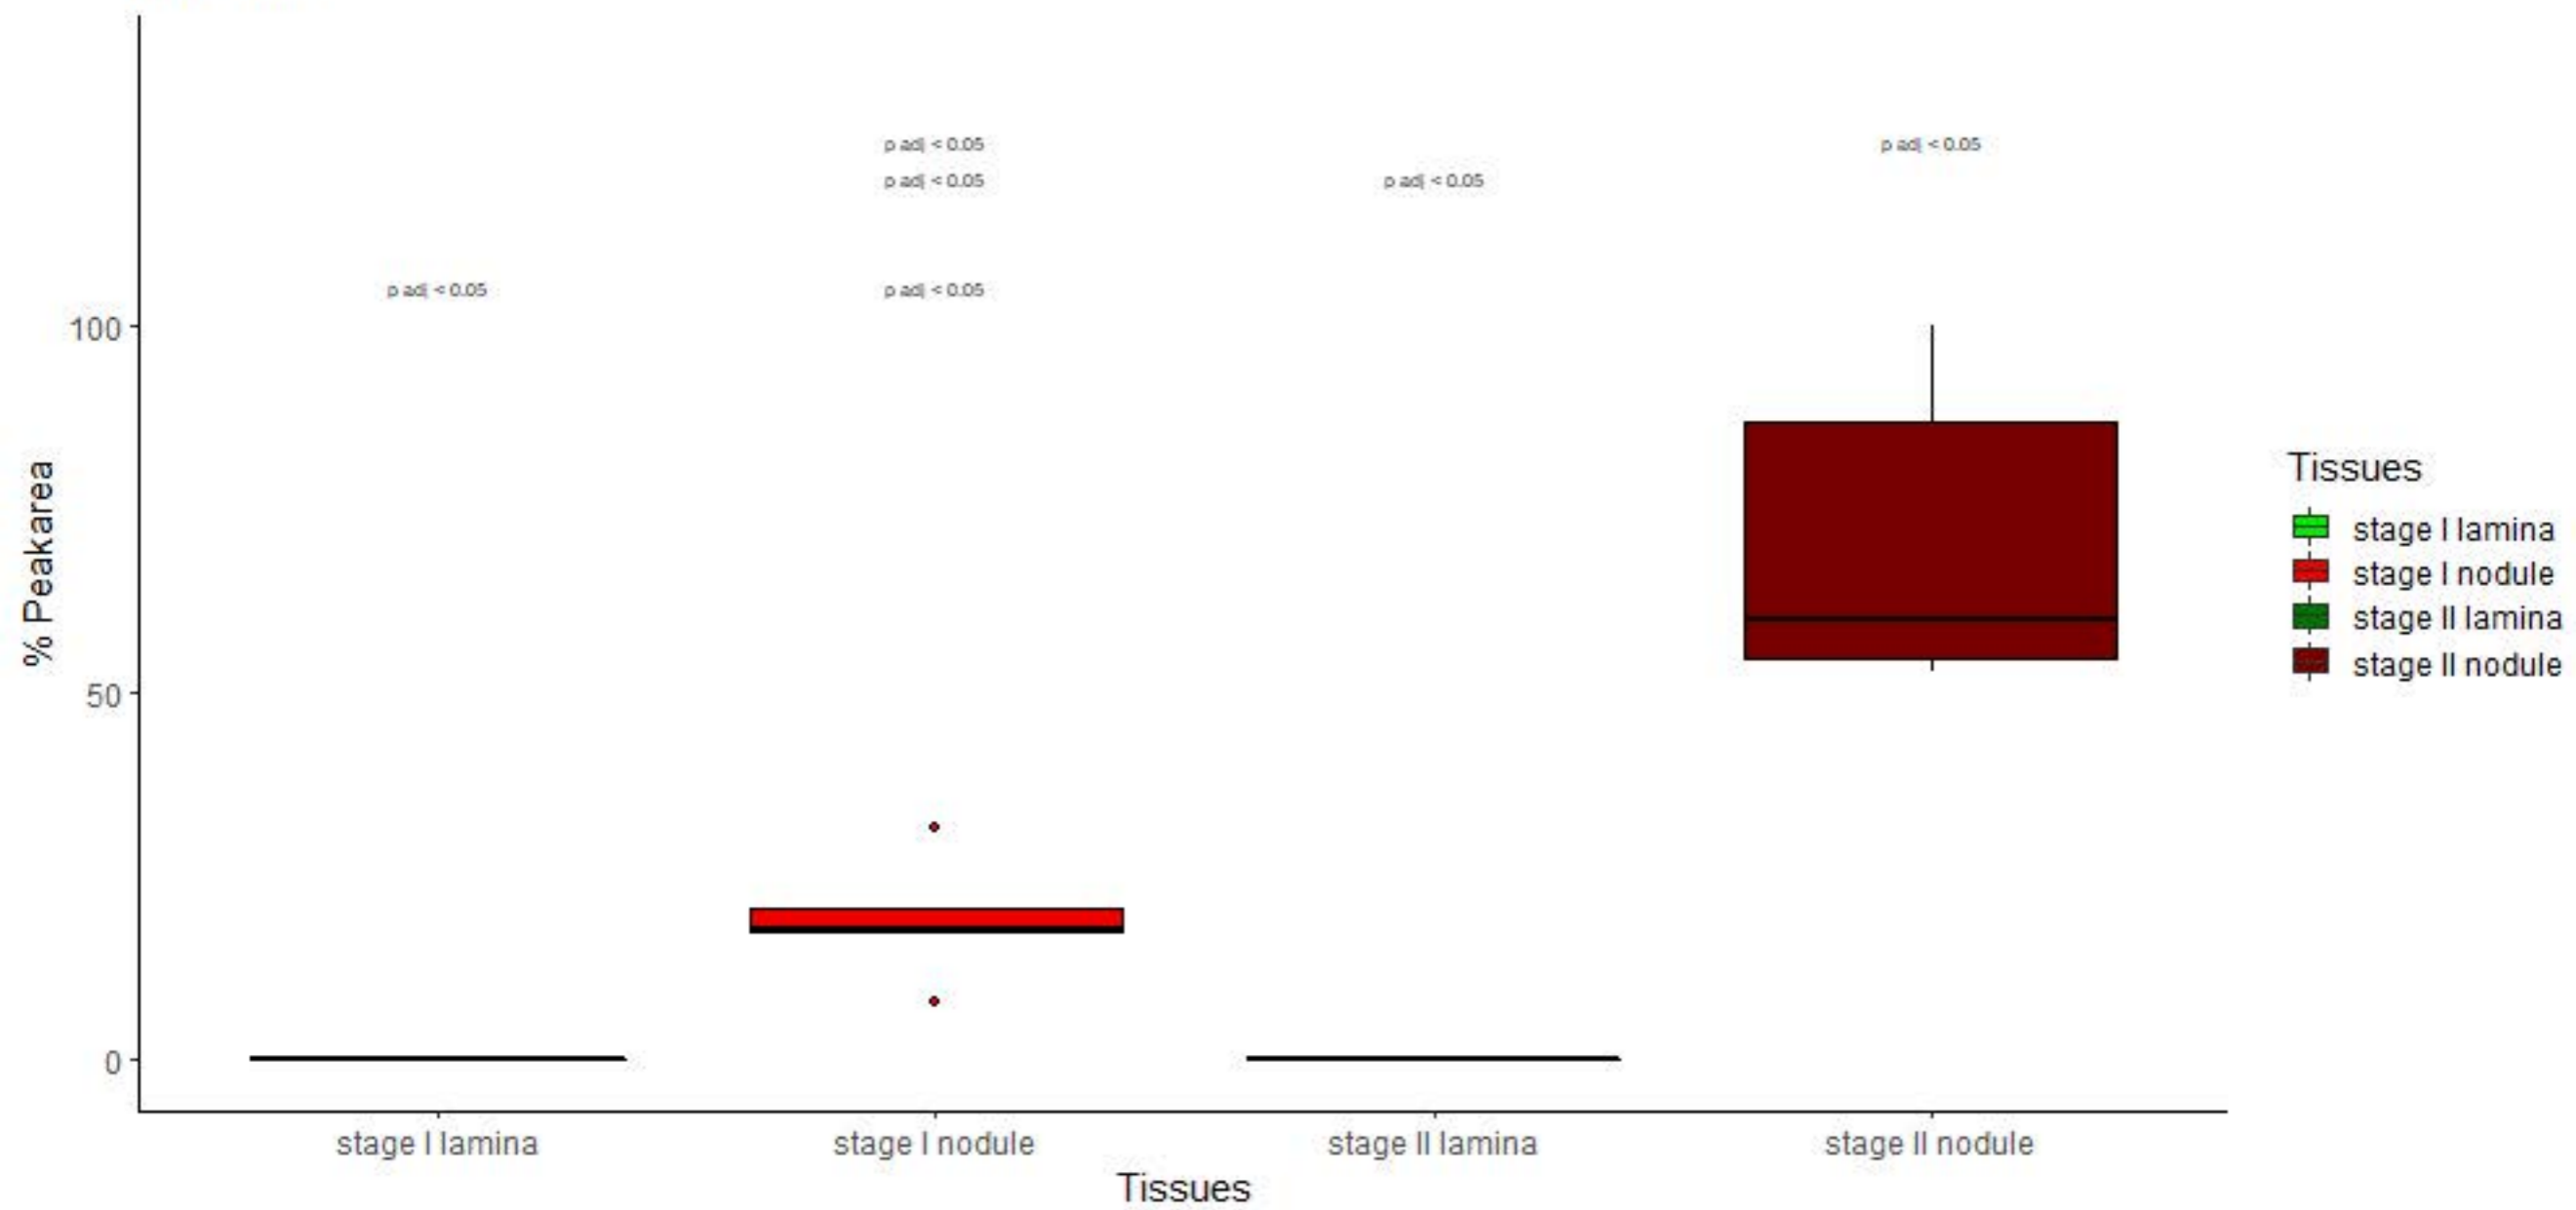

NA 25

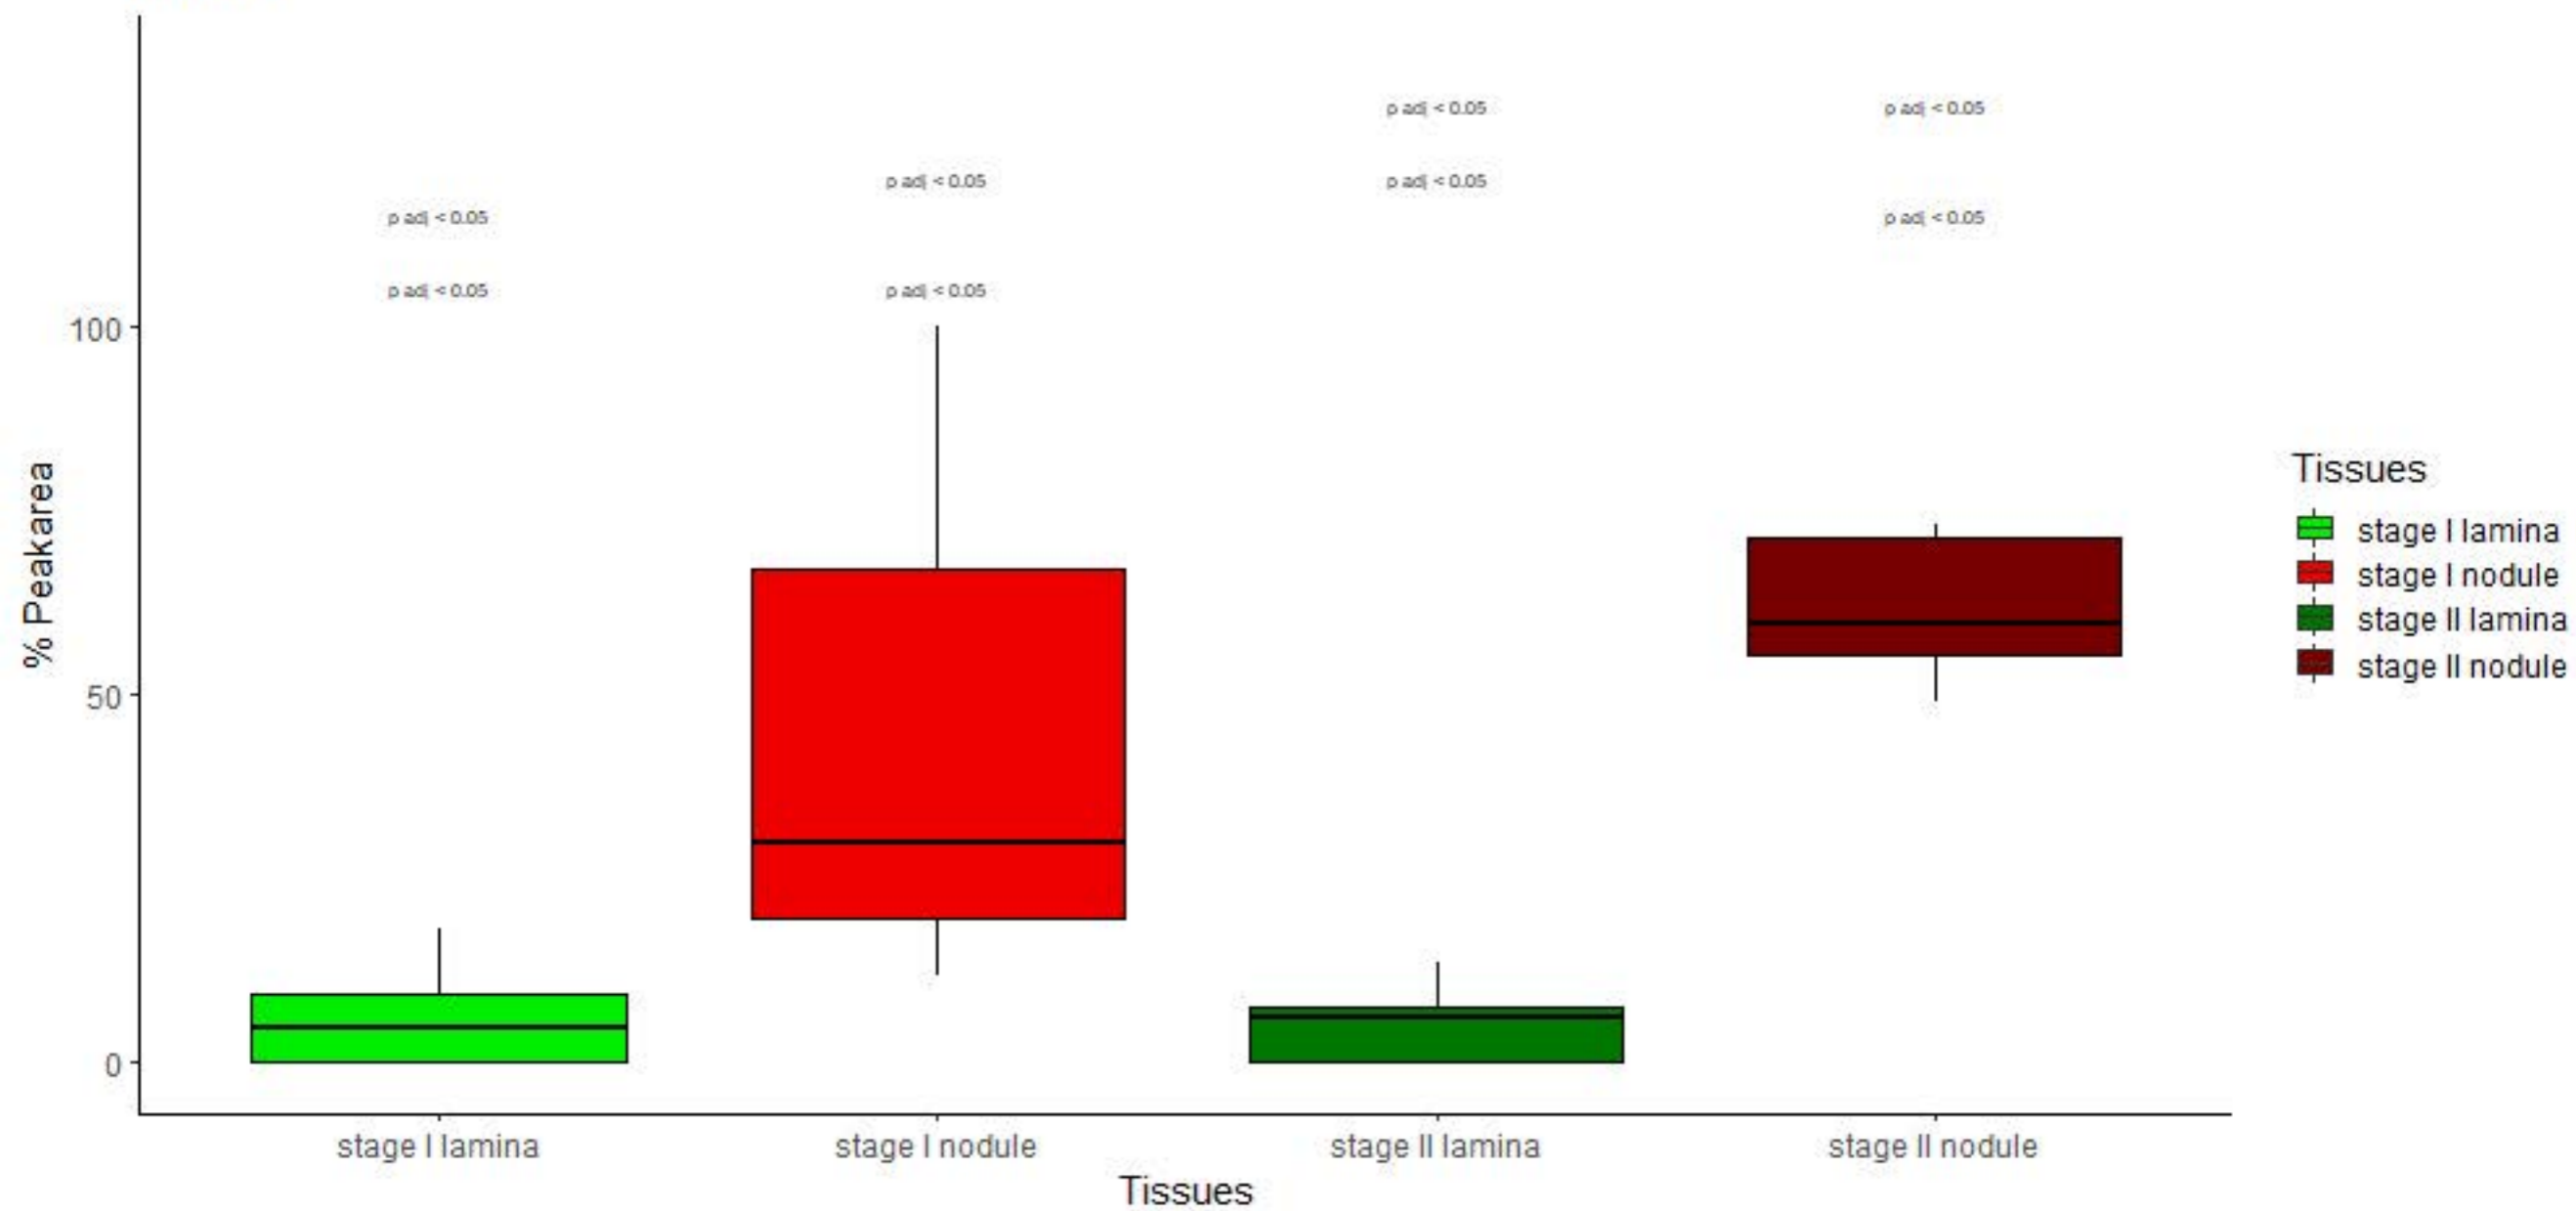

NA 39

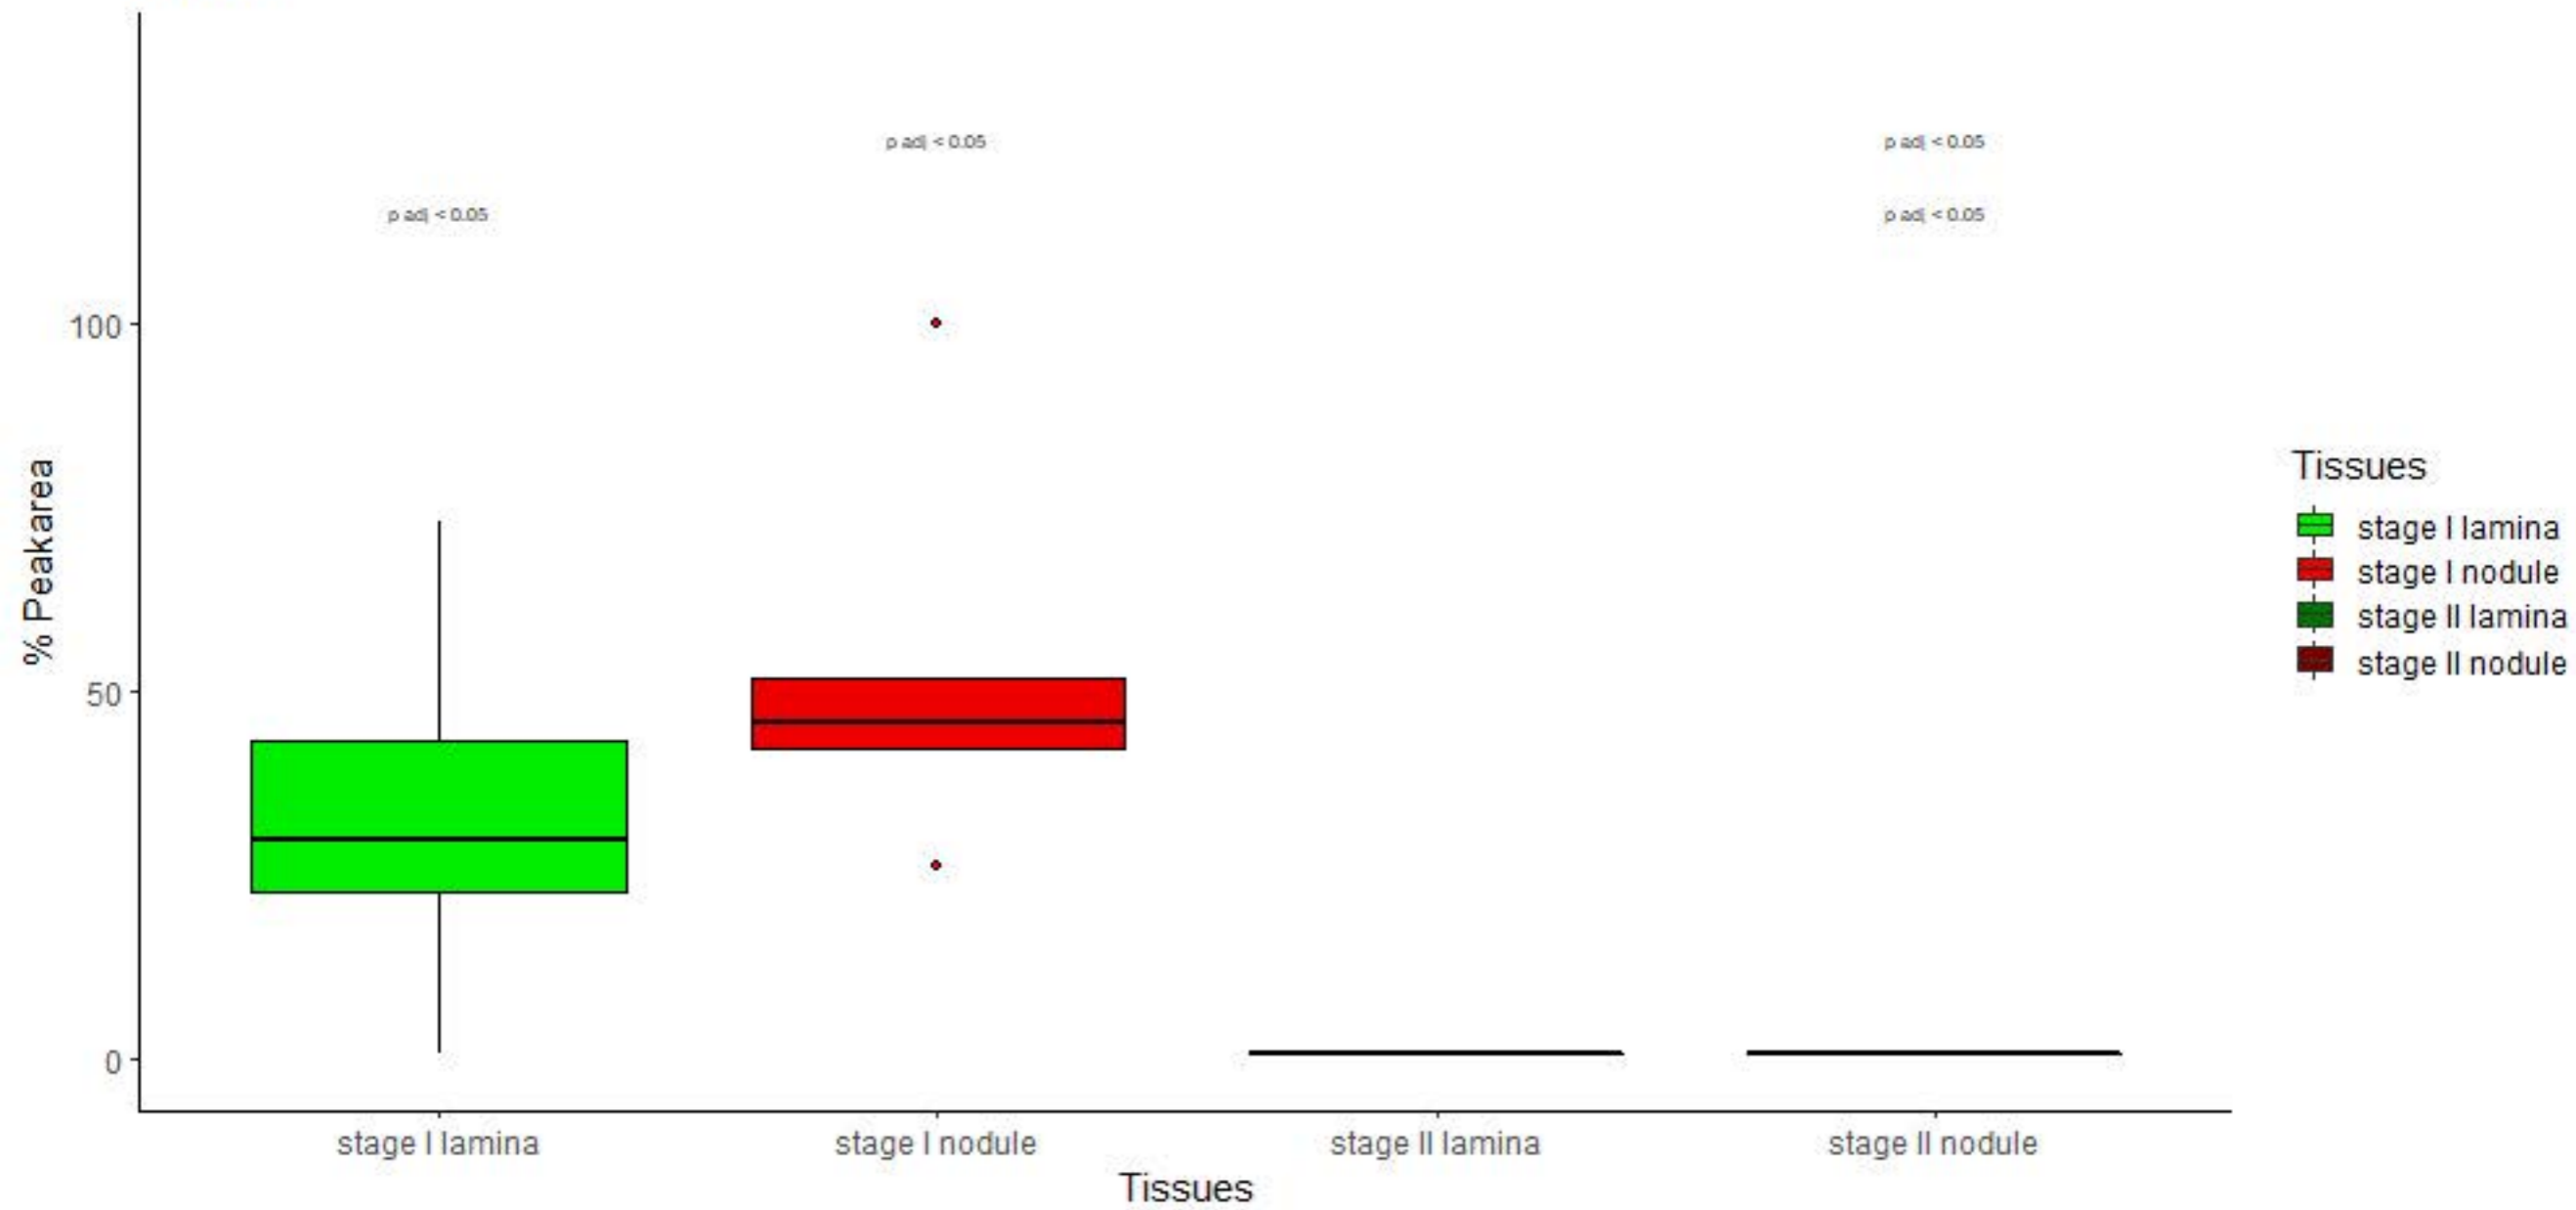

NA 46

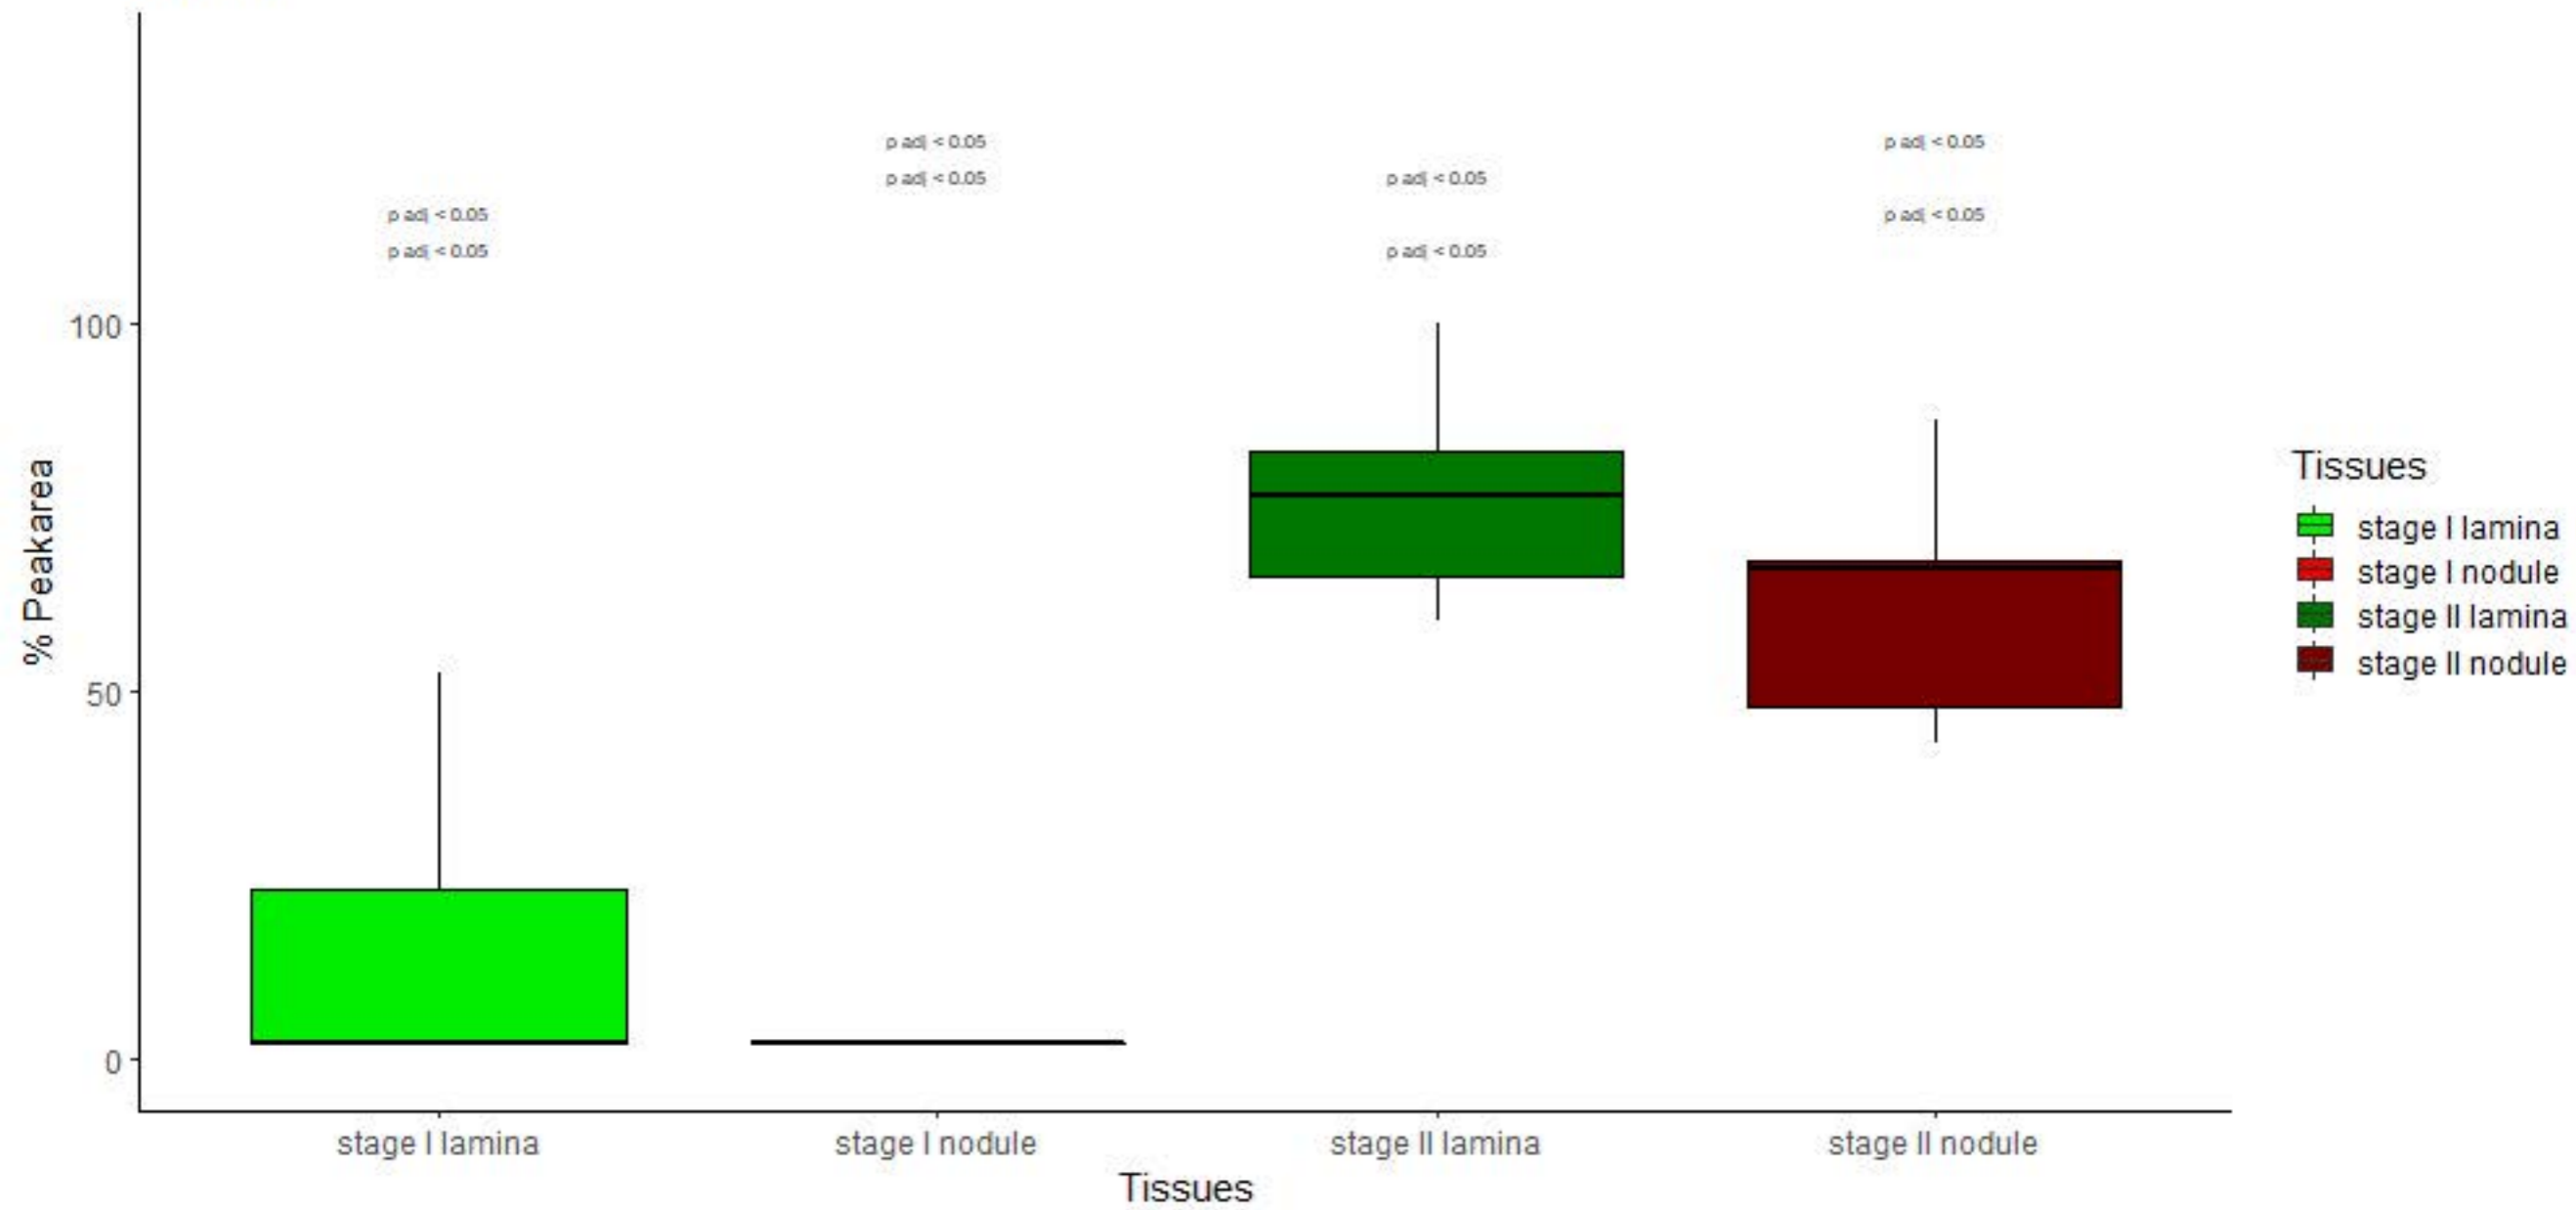

NA 5

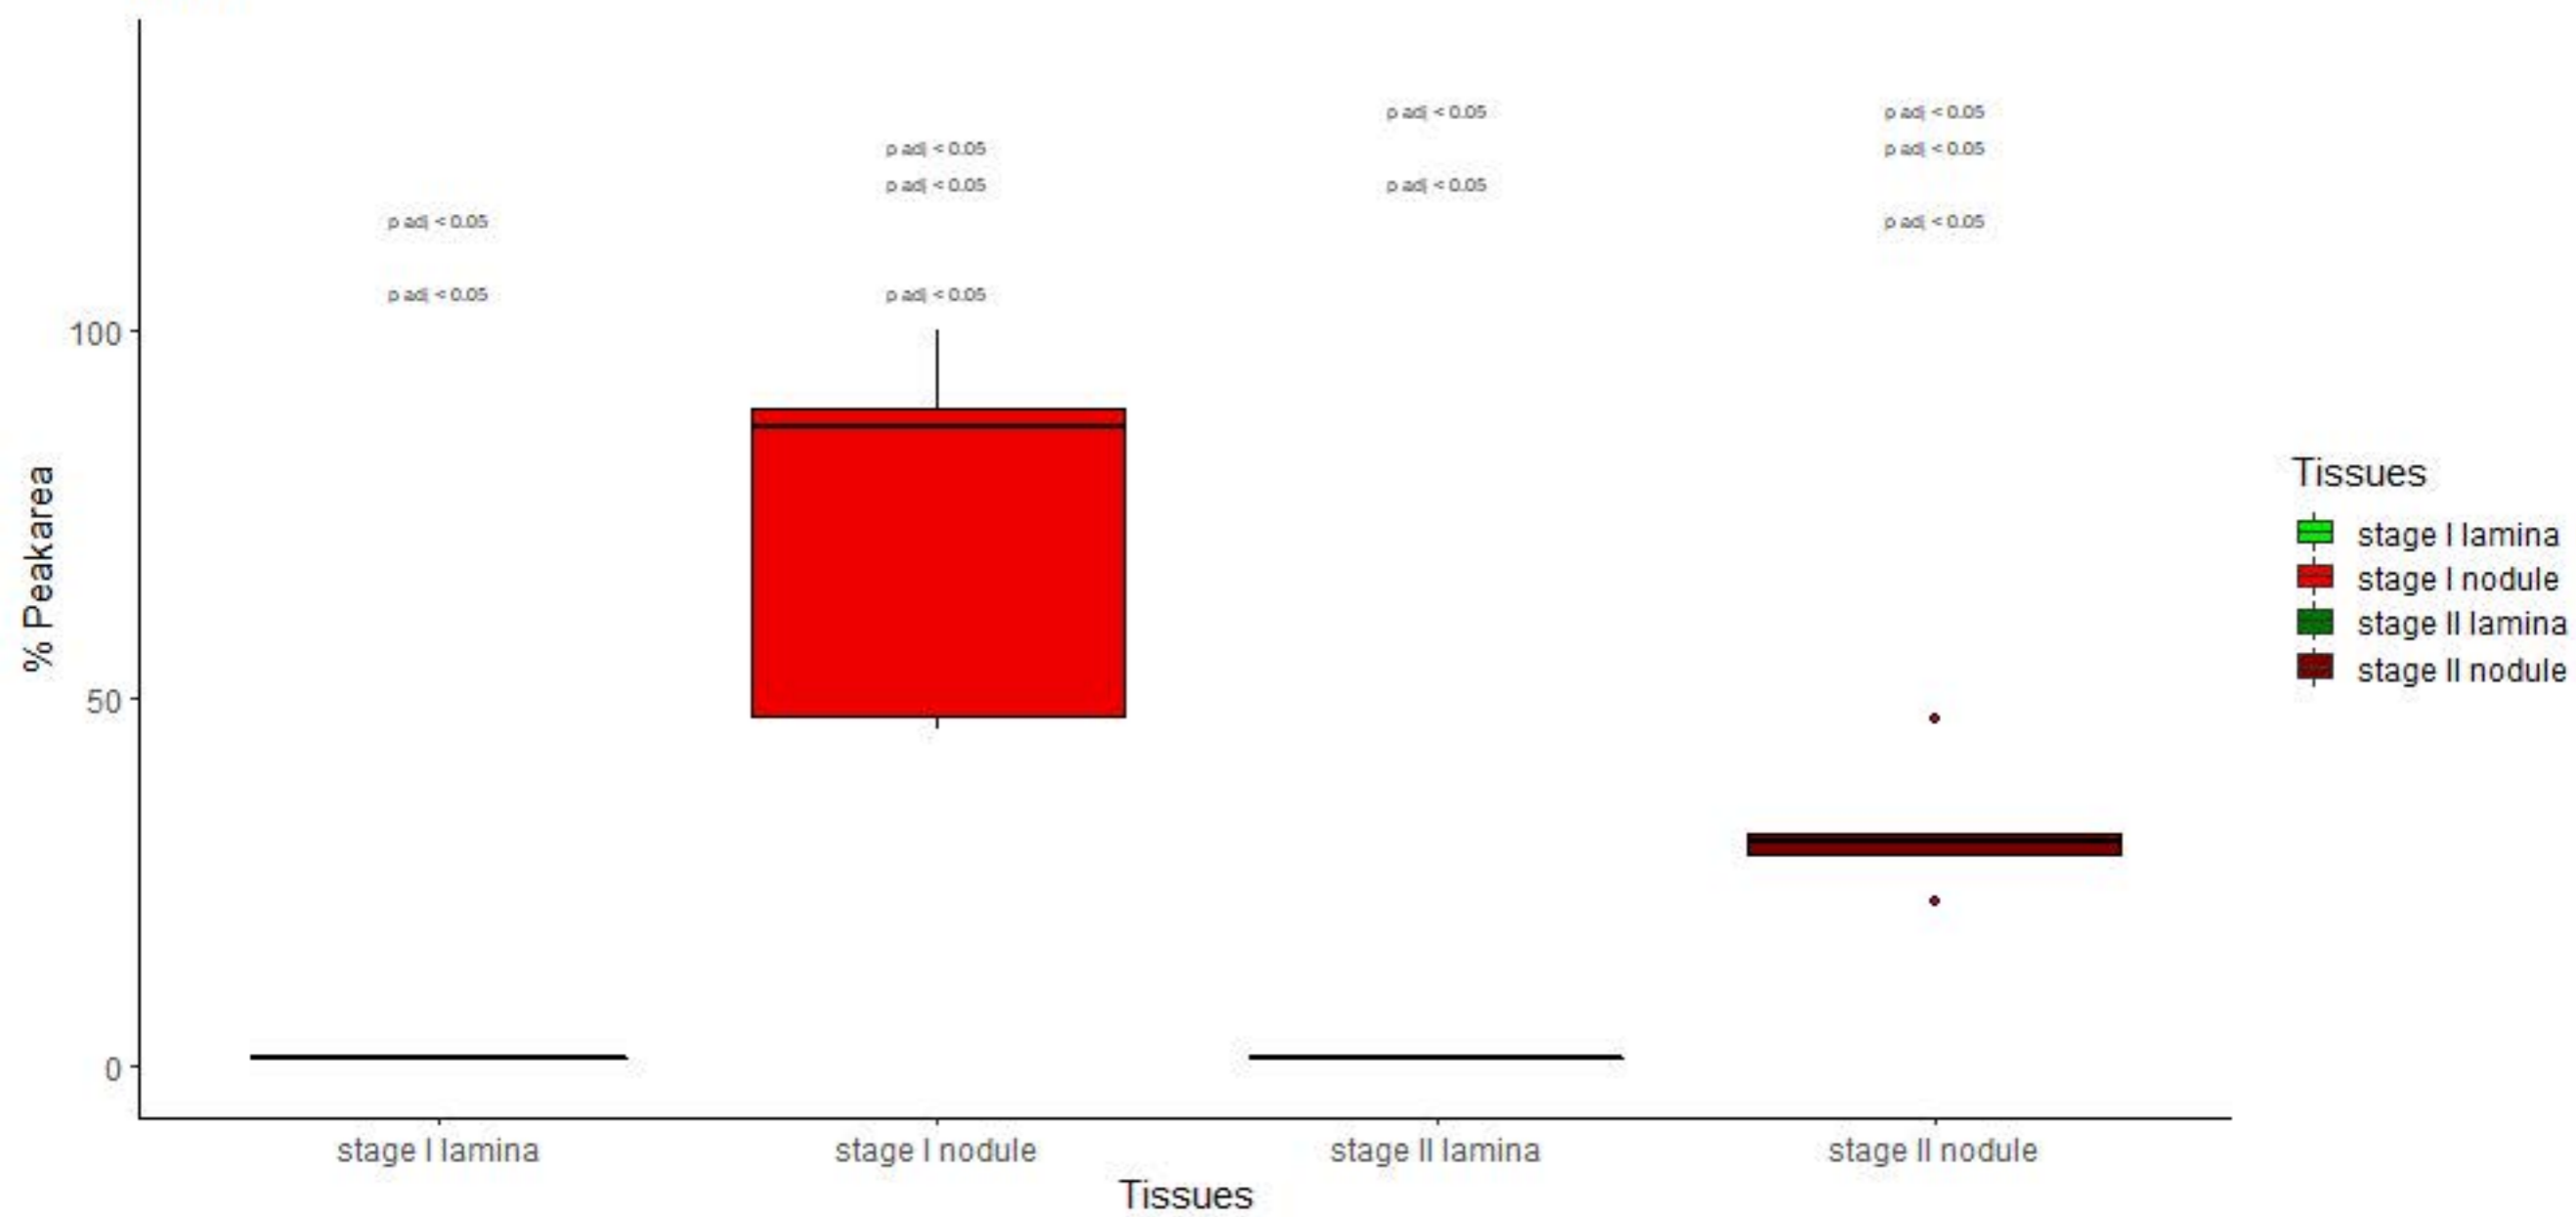

NA 64

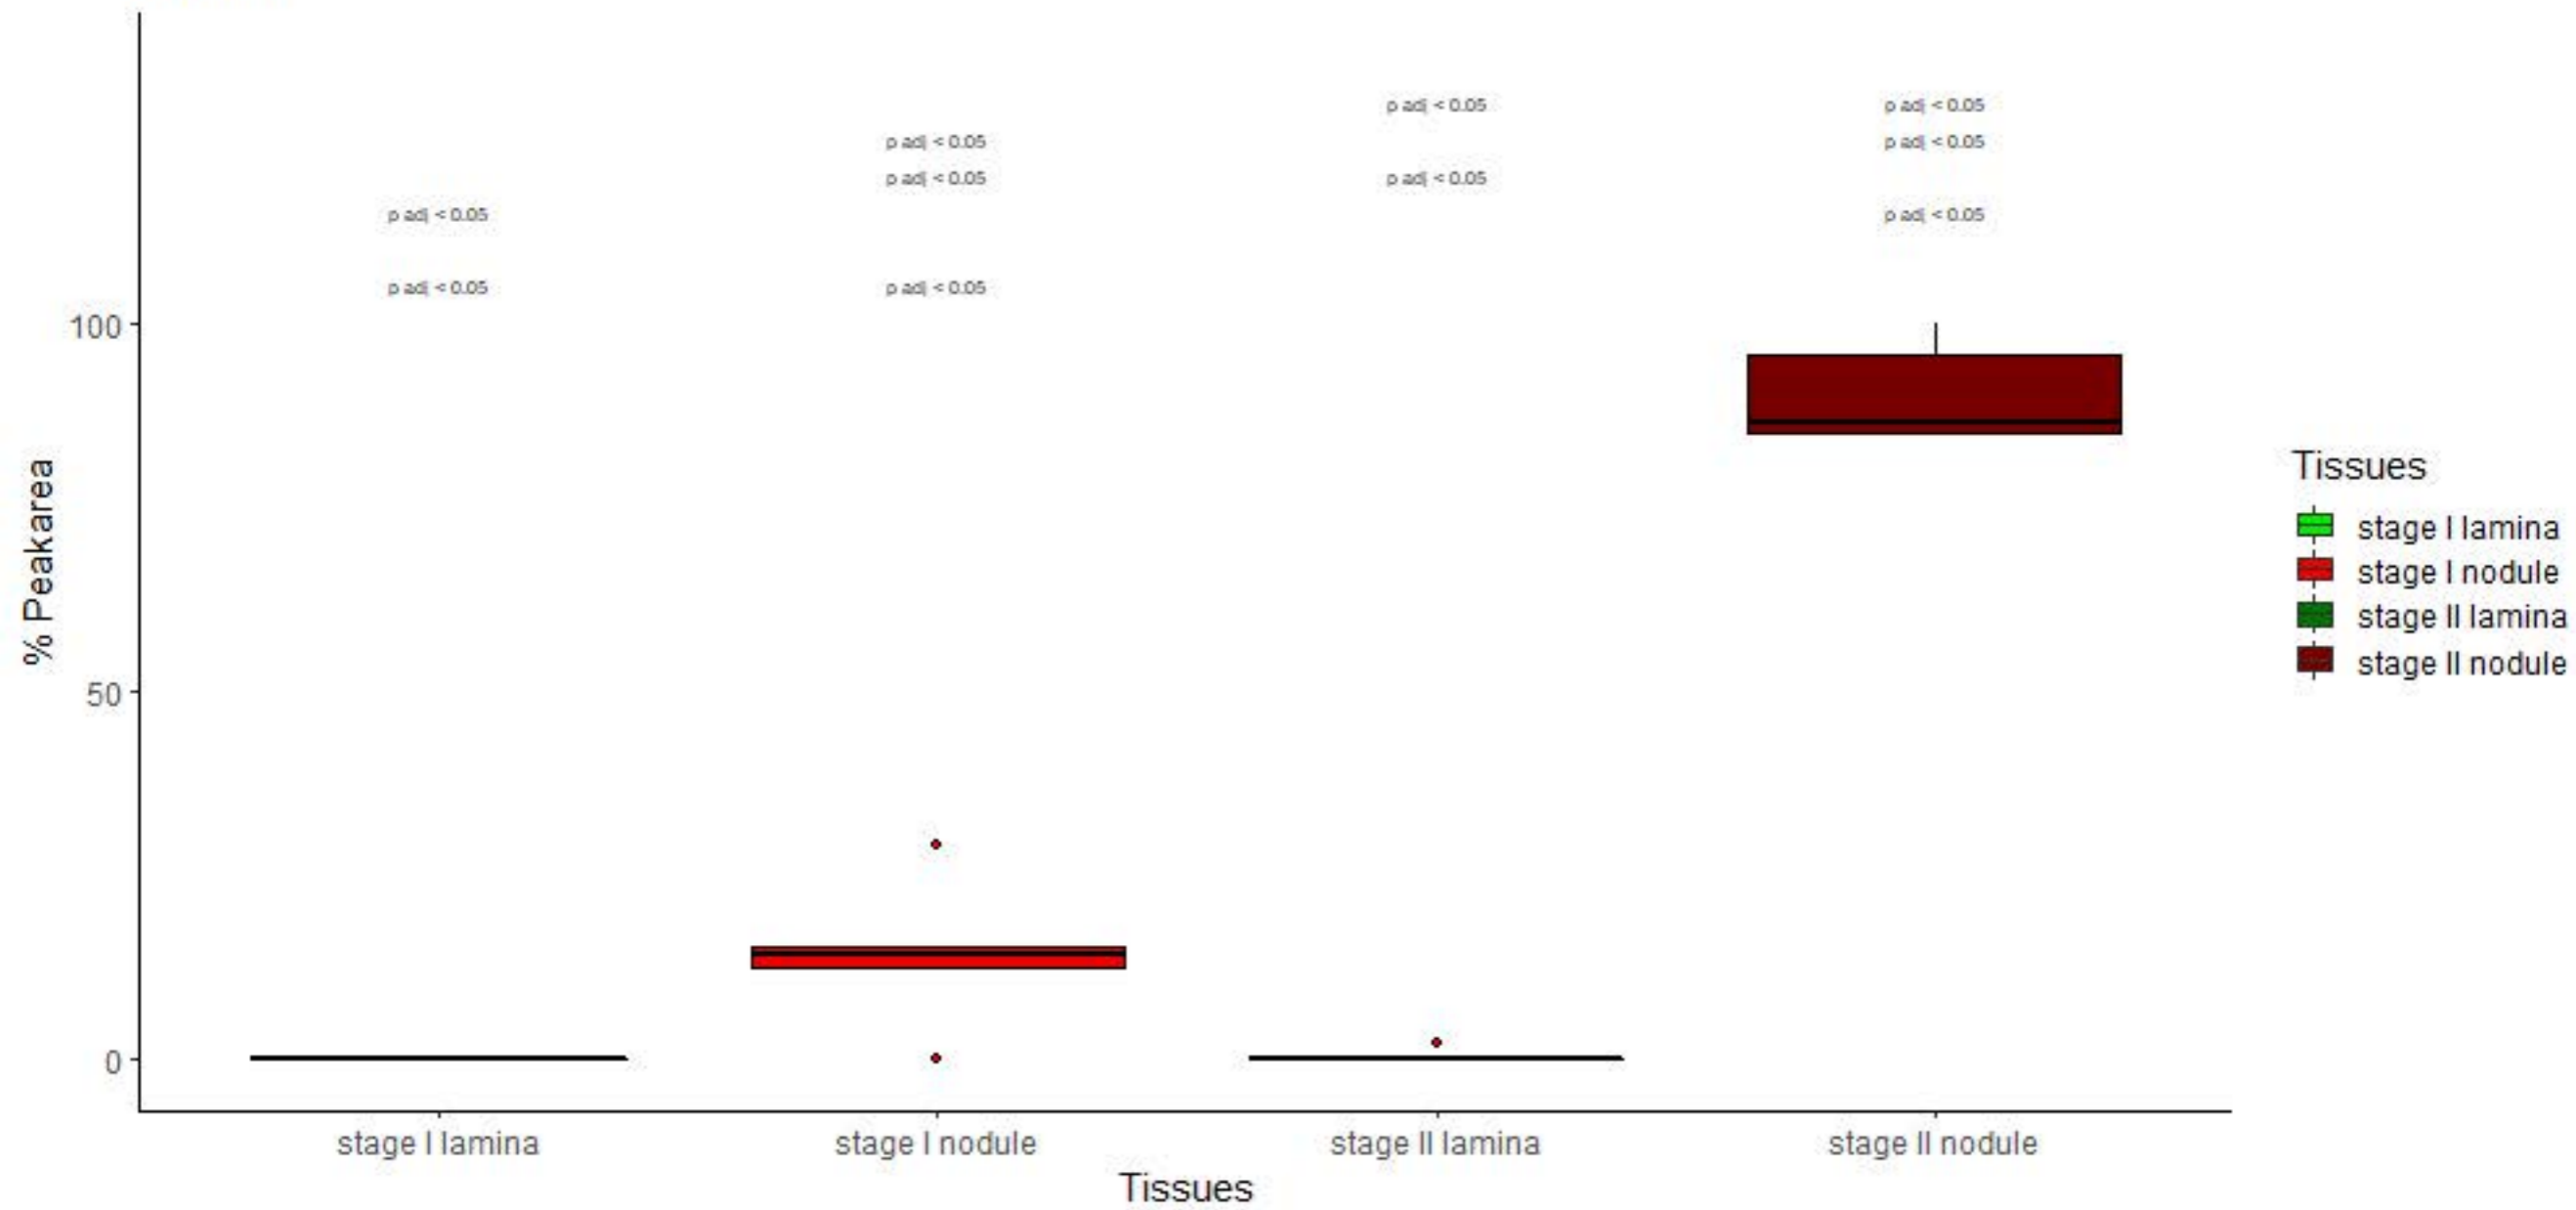



NA 78

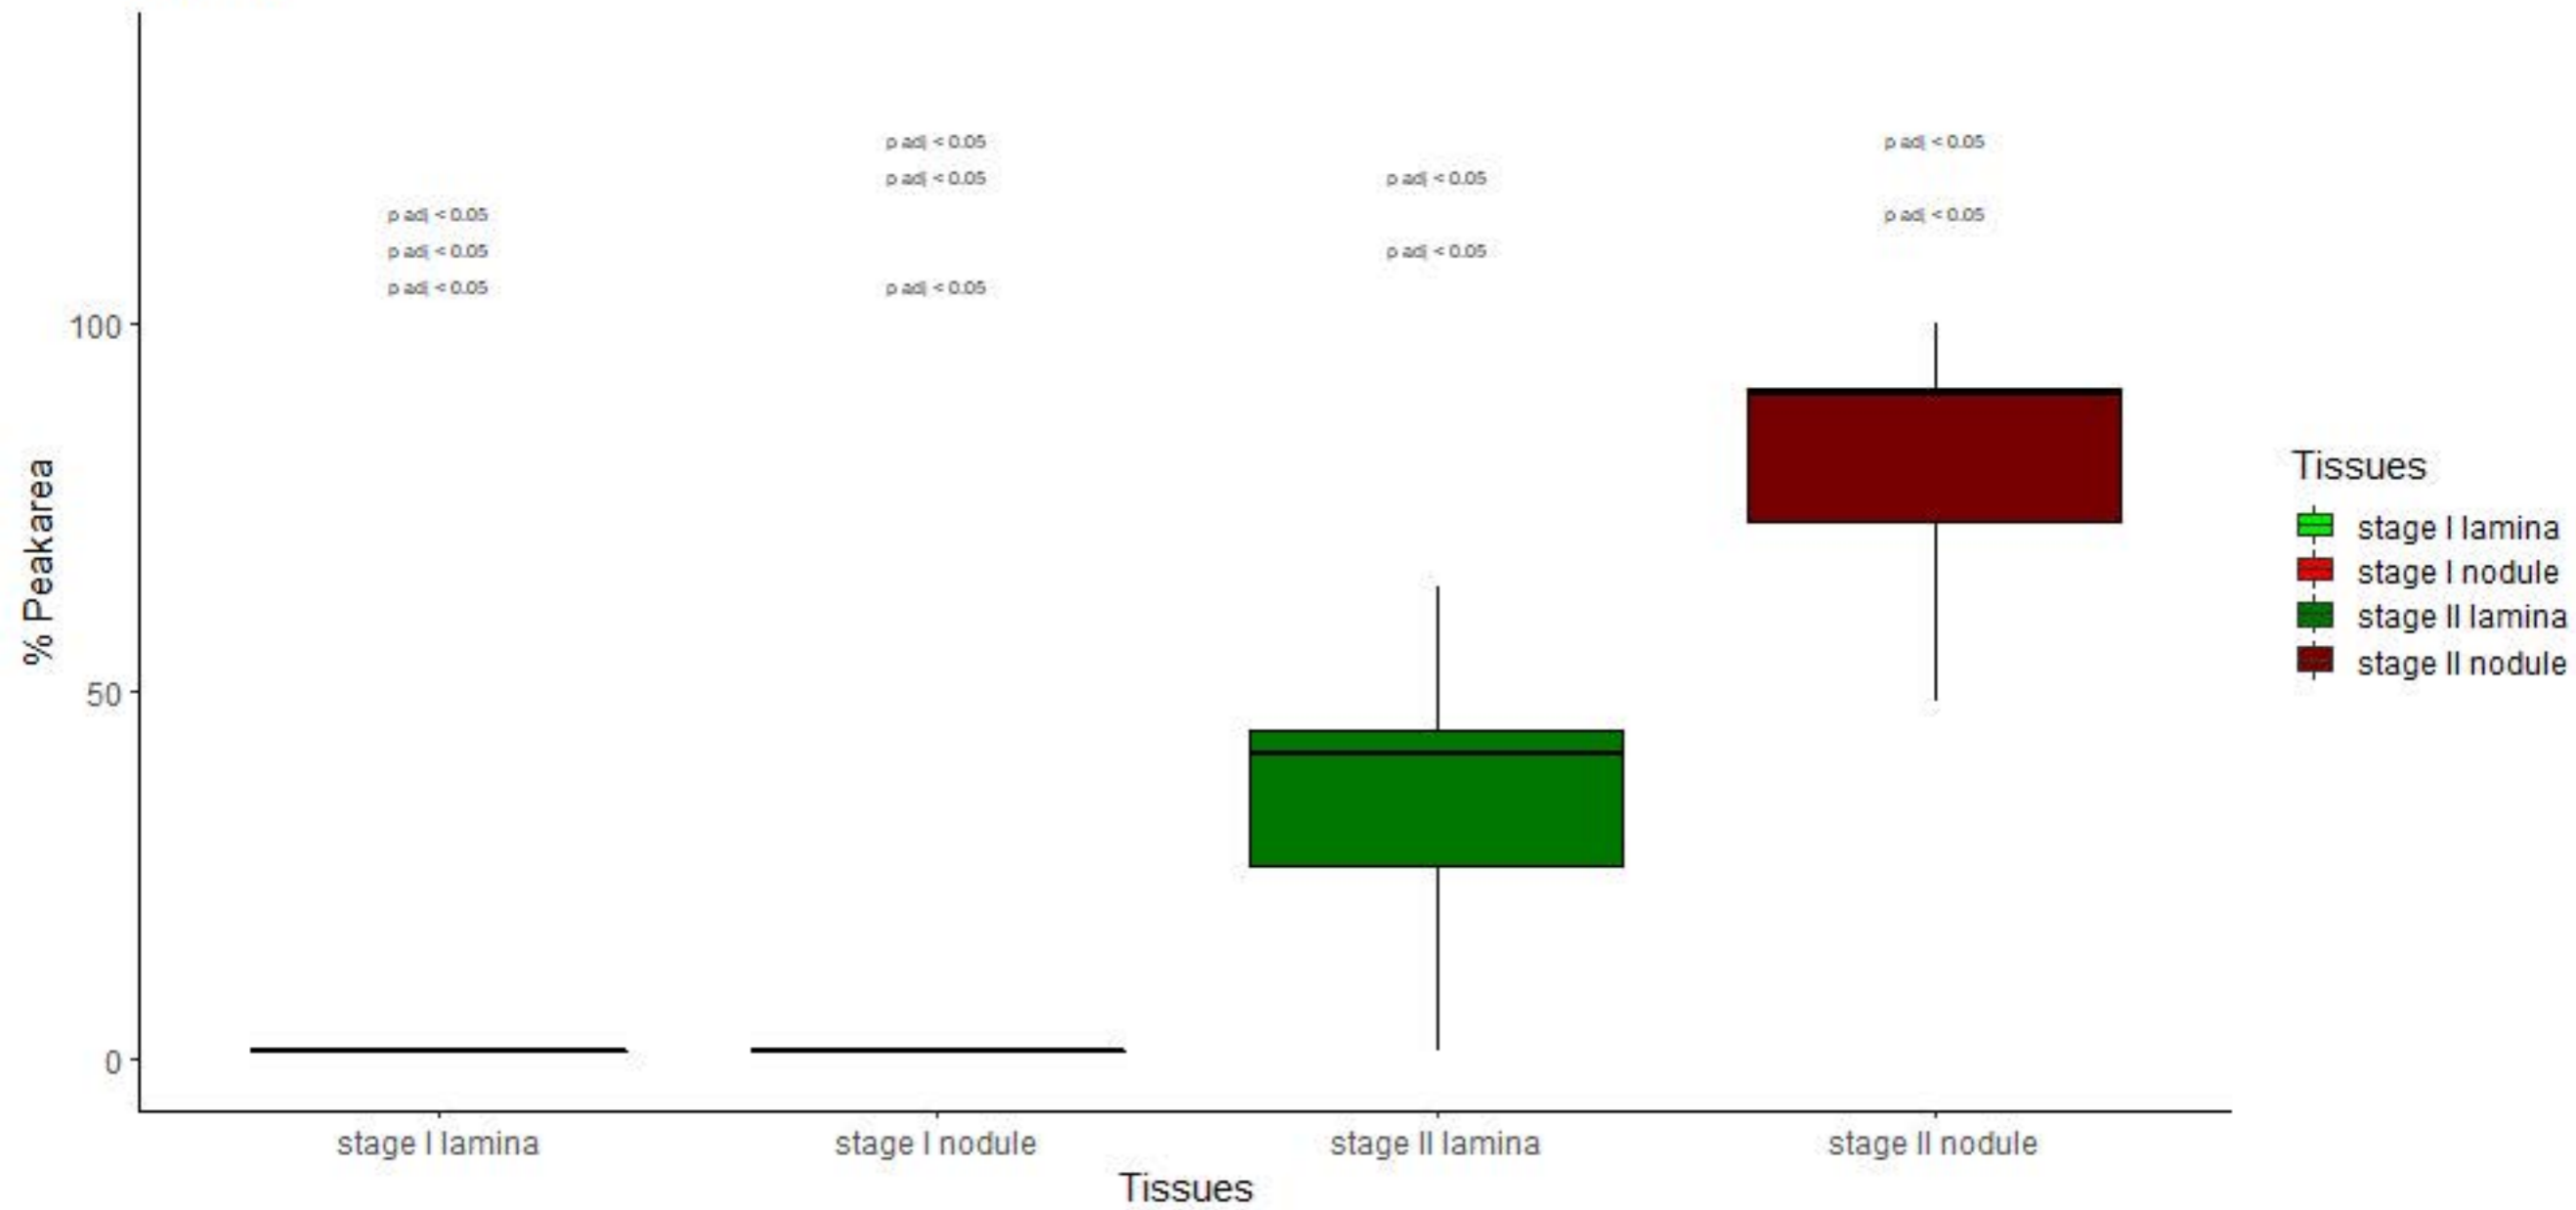

NA 80

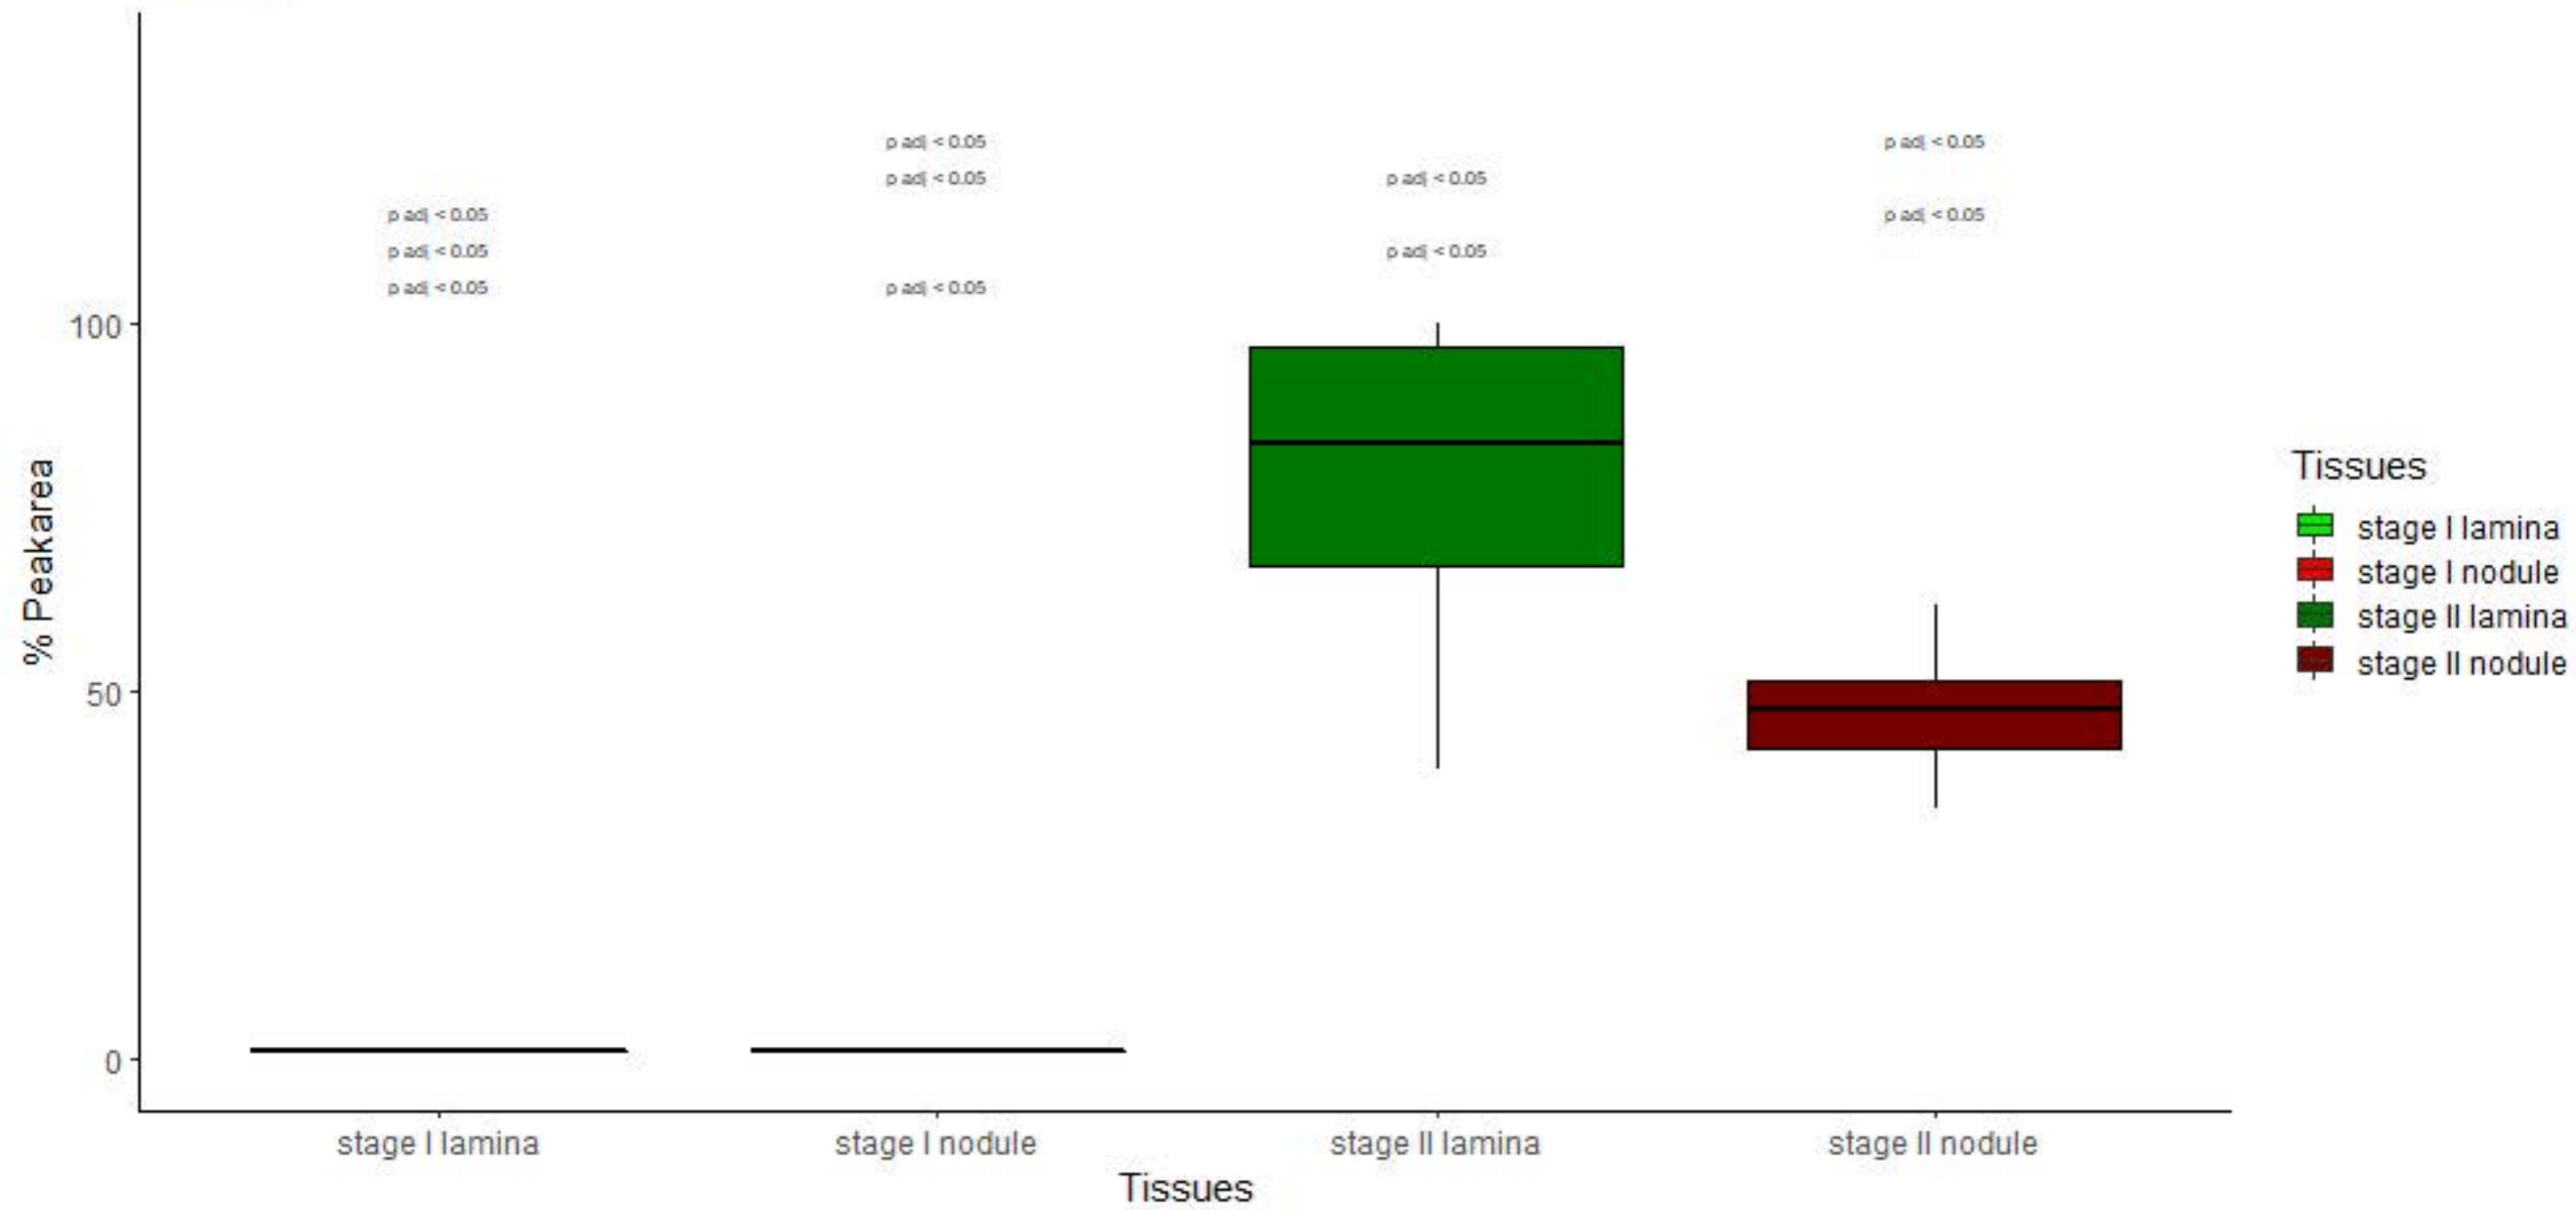

NA 102

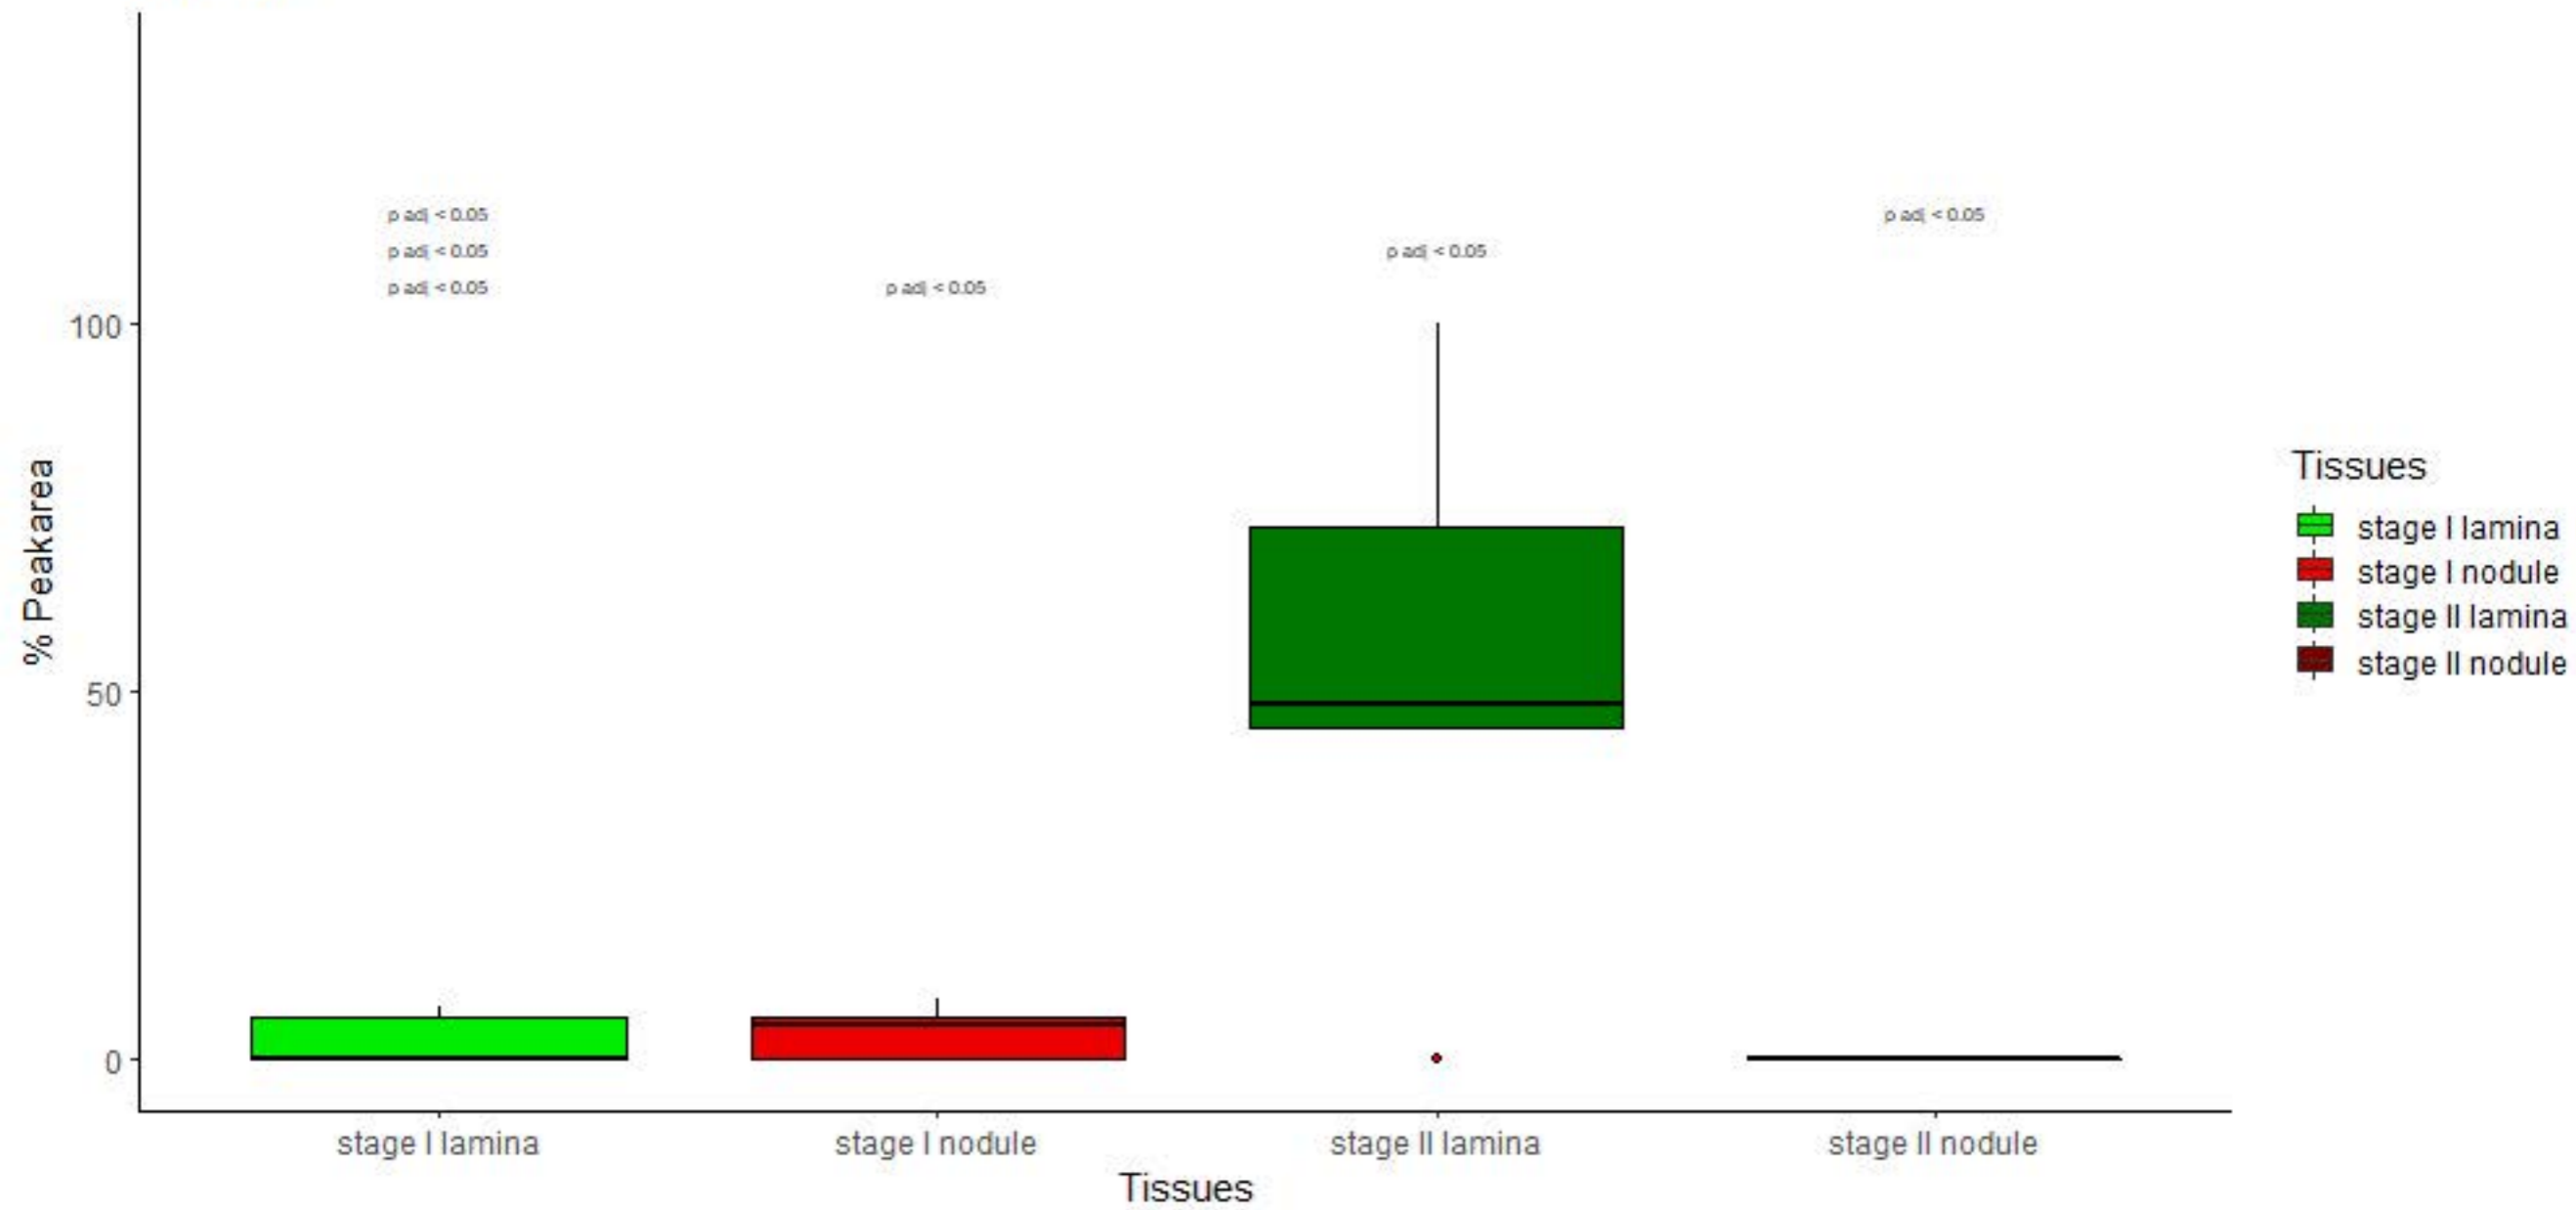

NA 121

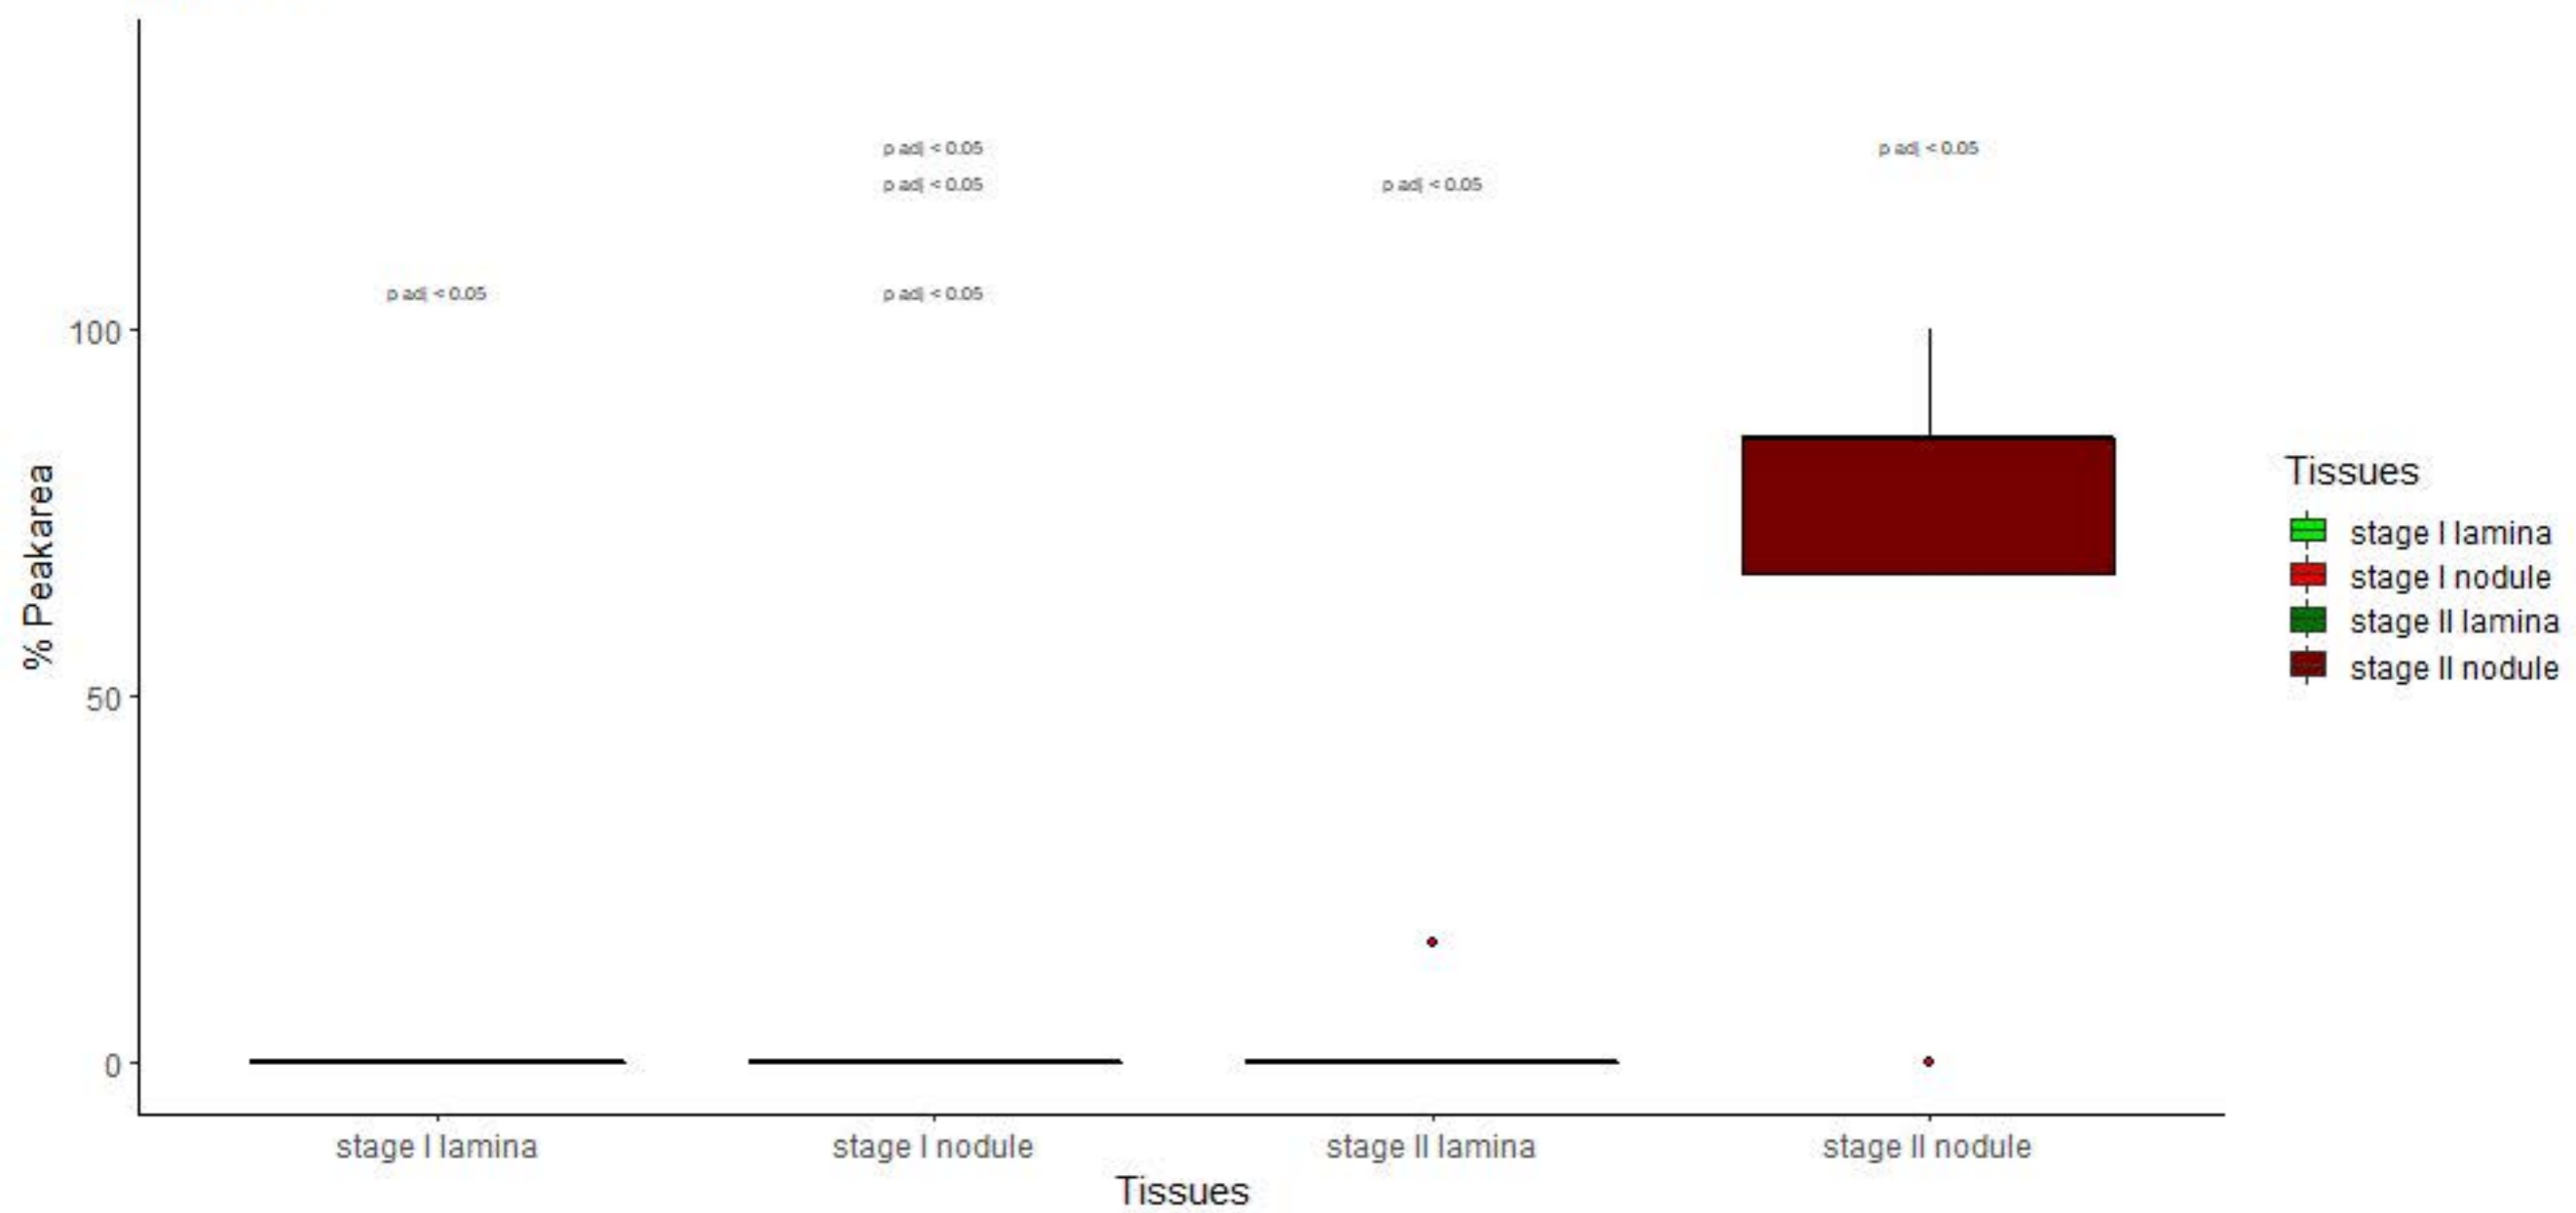

NA 3

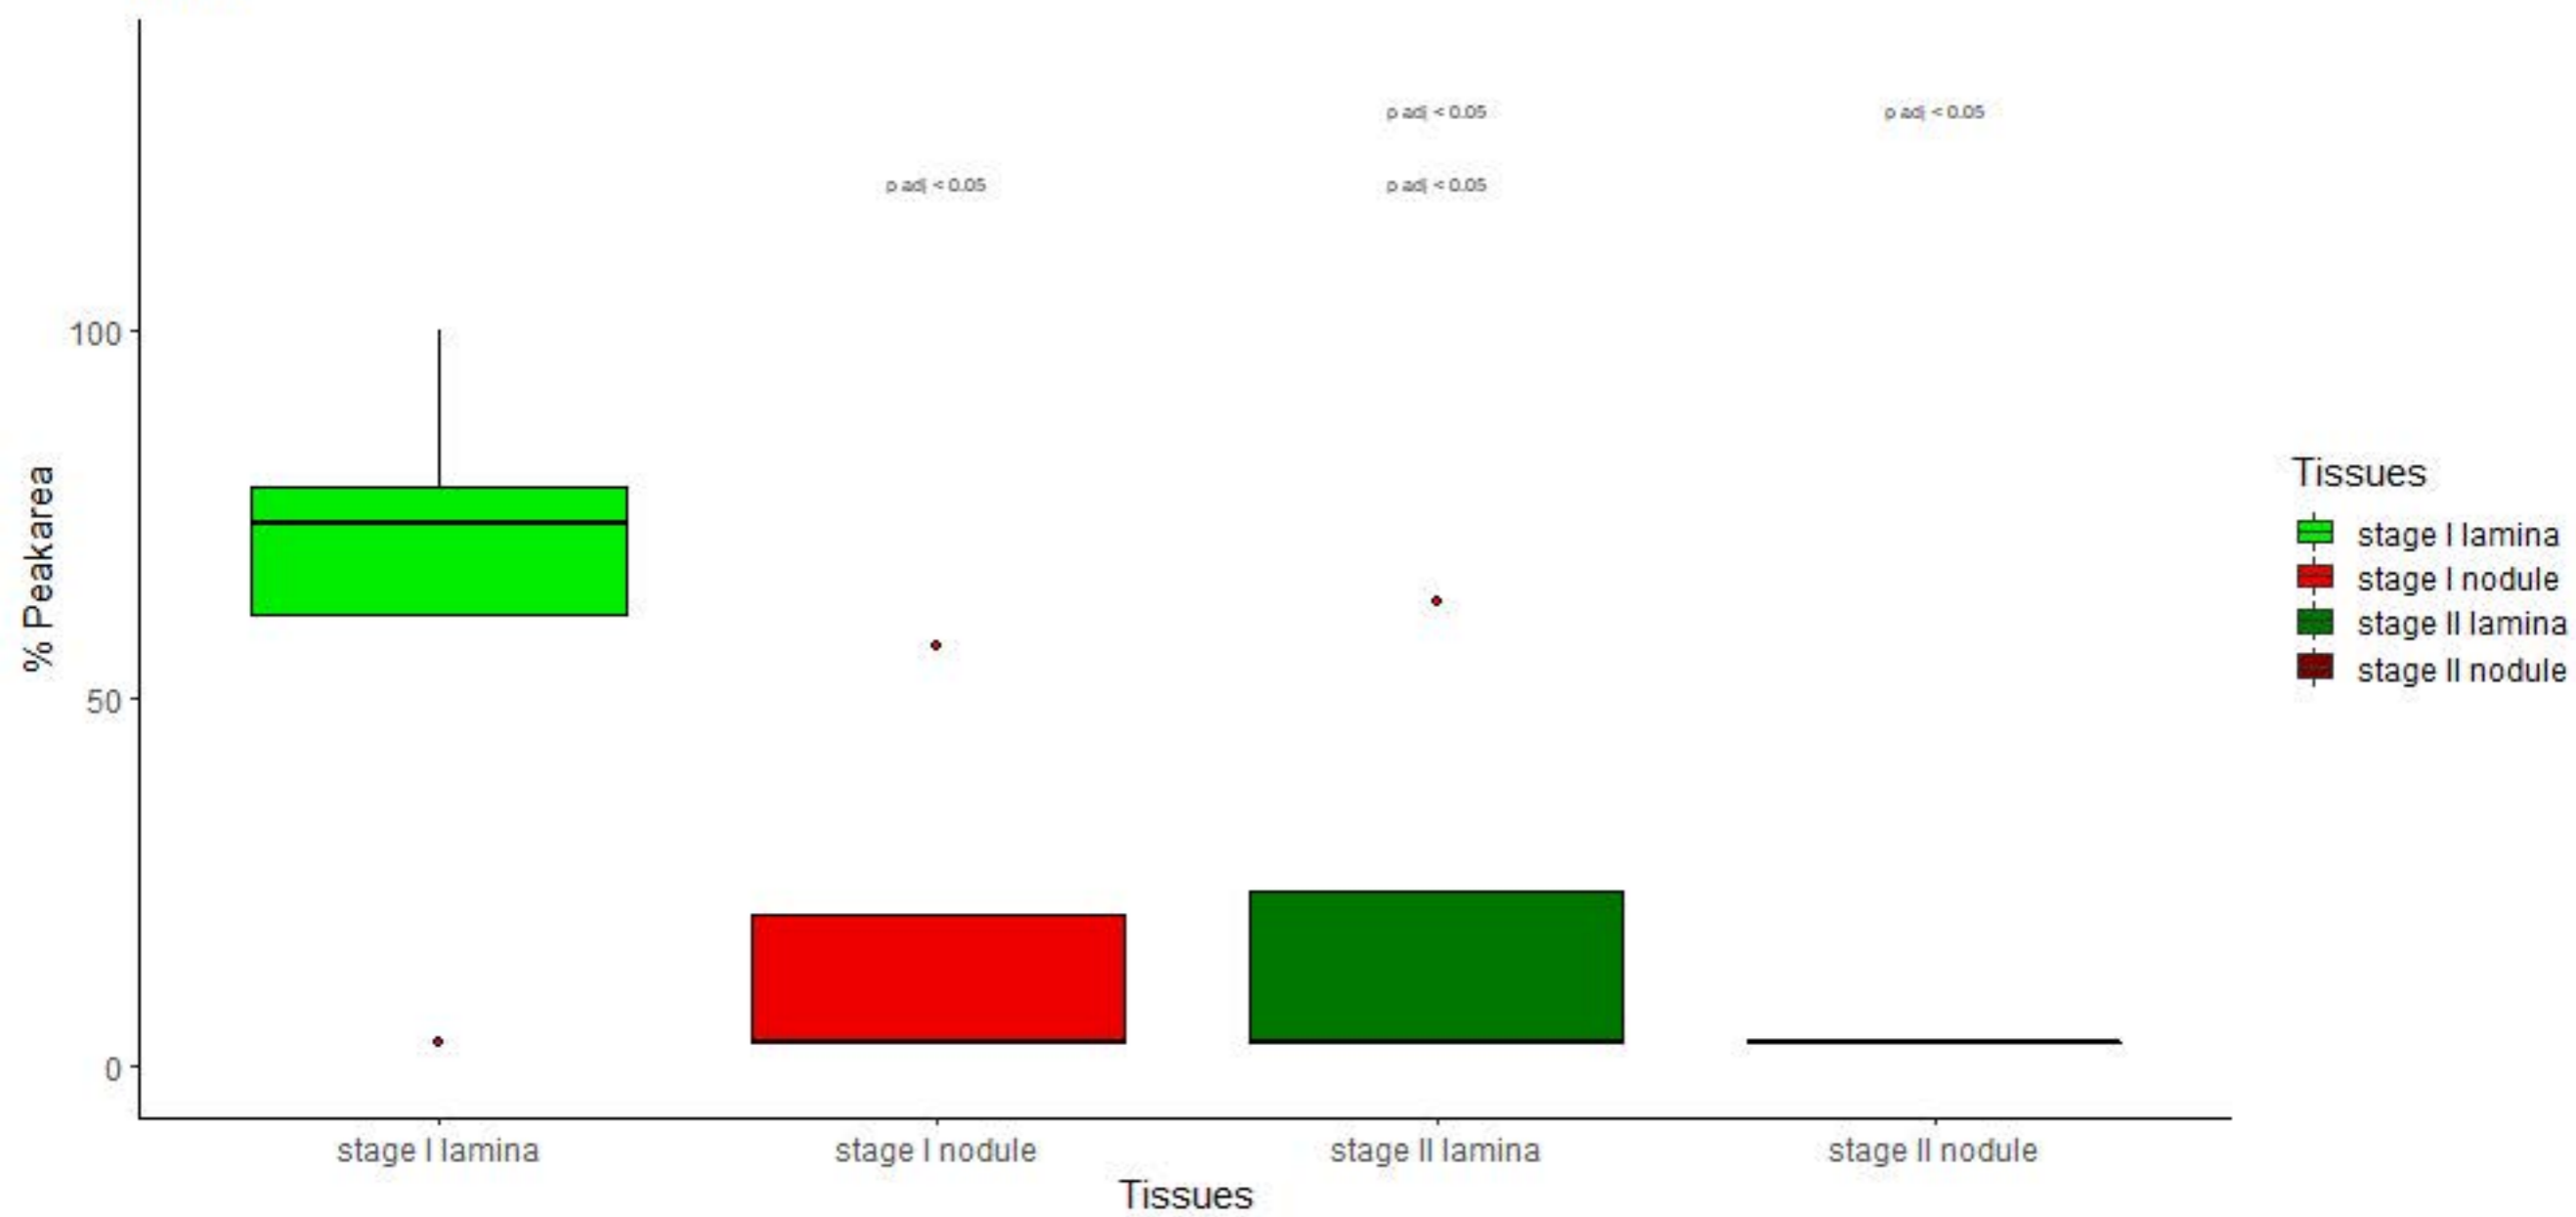

NA 63

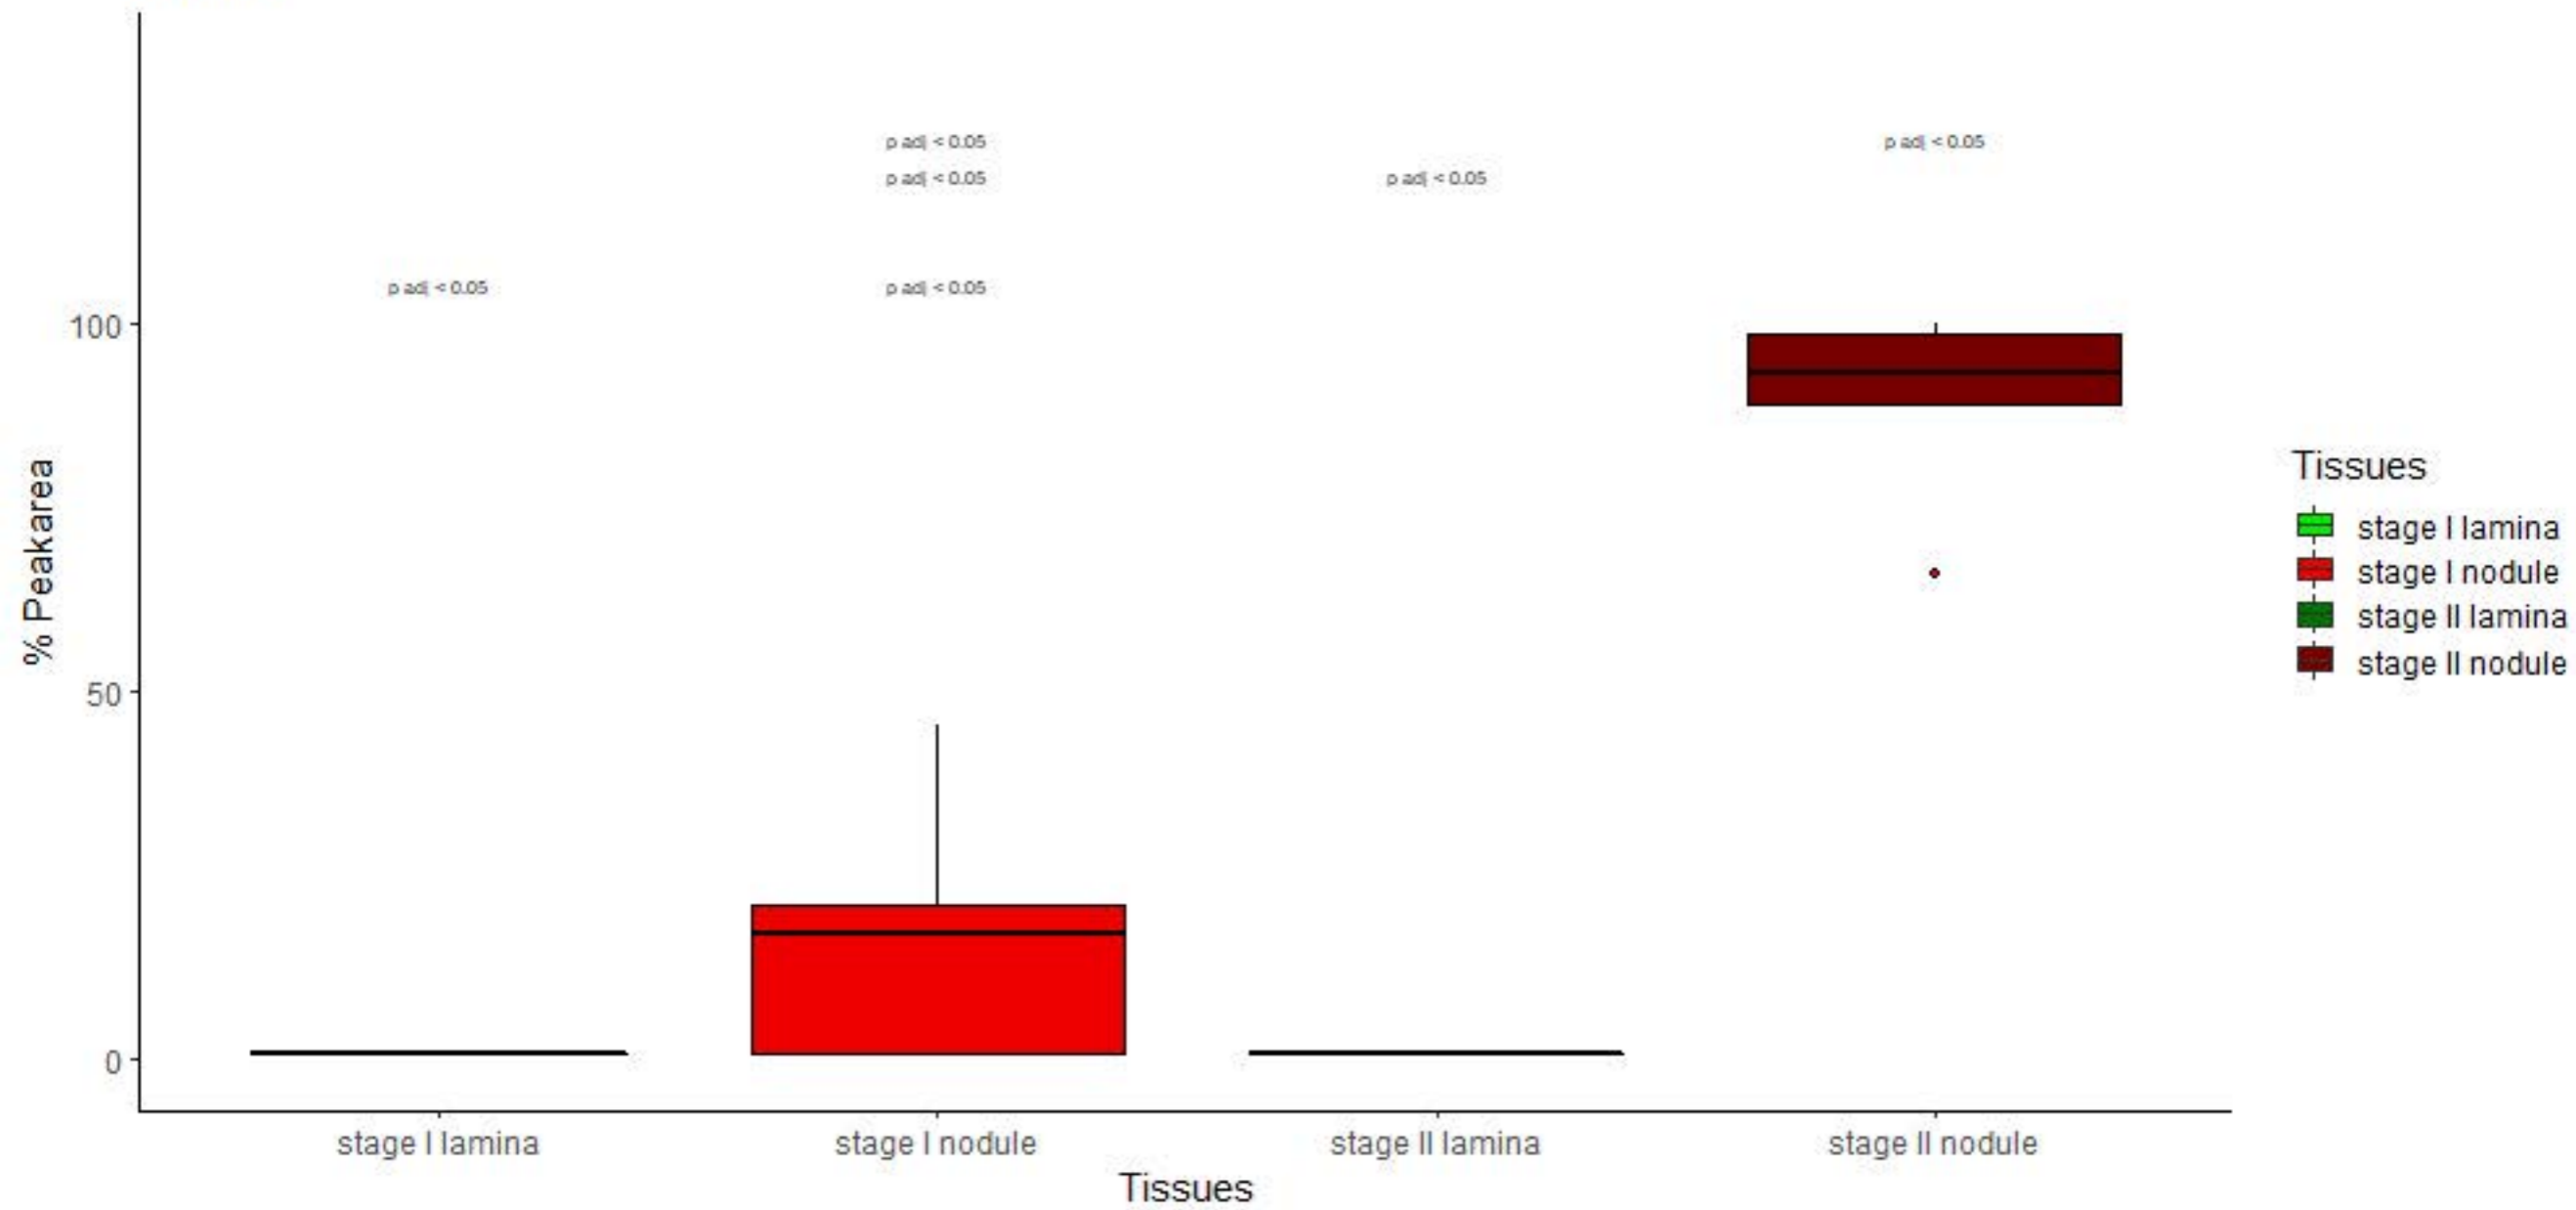

NA 88

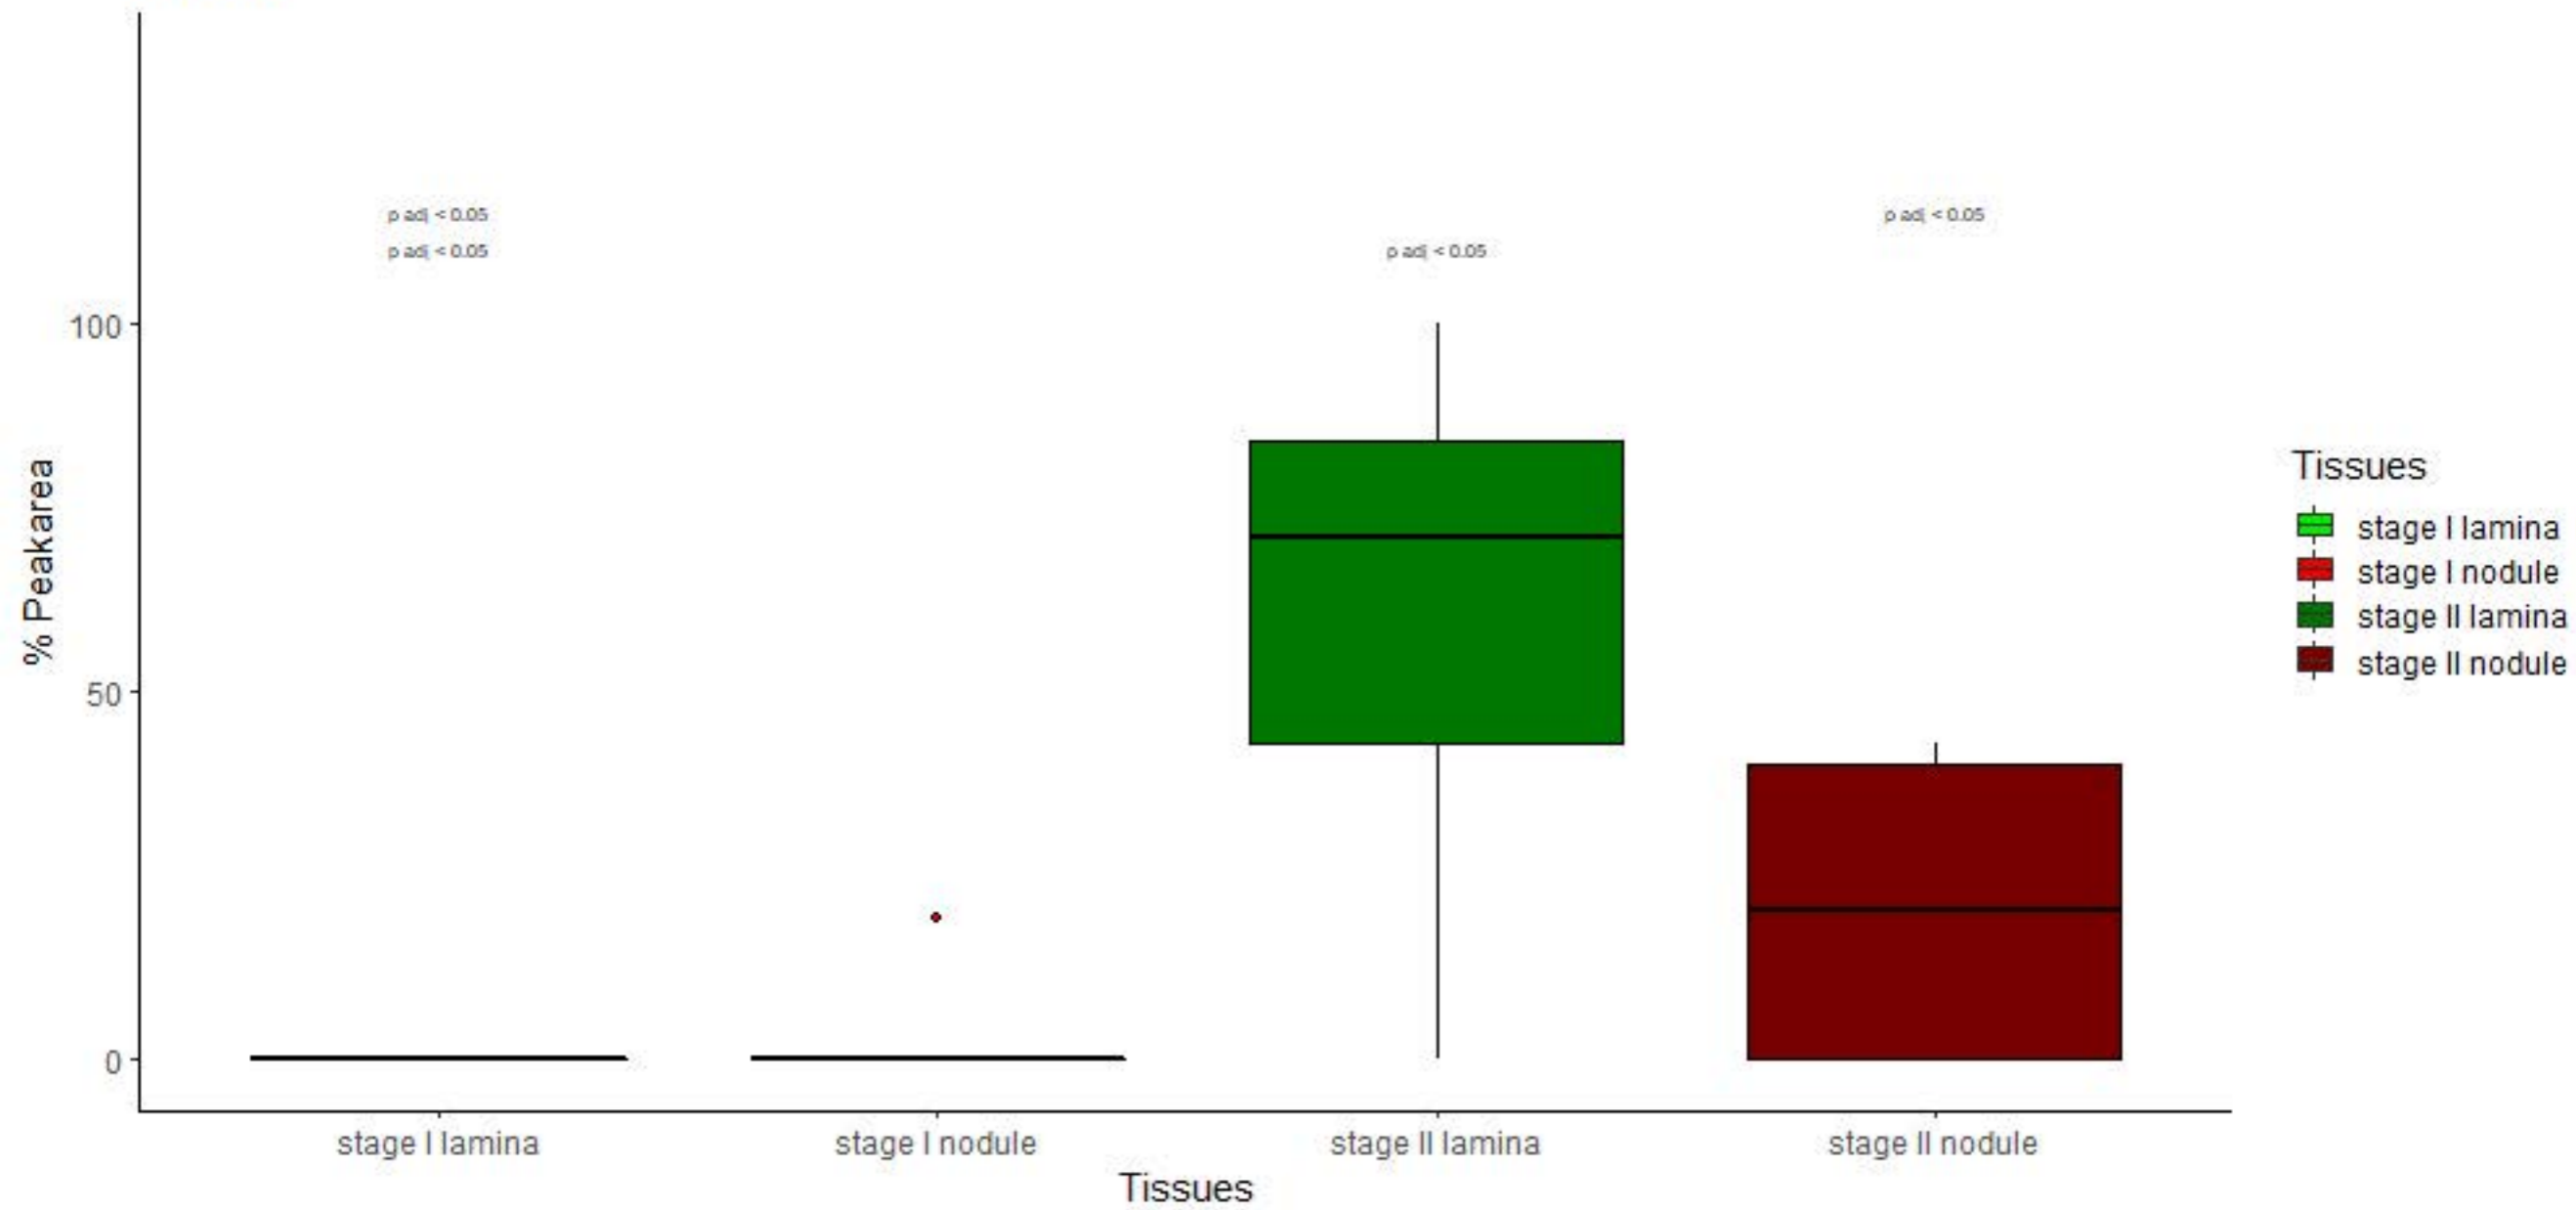

Supplement: DataSheet3.pdf [file DataSheet3.pdf]
